# Supplementary material for: Comparative proteomic analysis of pepper (Capsicum annuum L.) seedlings under selenium stress
Source: PeerJ. 2019 Nov 27;7:e8020. doi: 10.7717/peerj.8020 (PMC6884995; doi:10.7717/peerj.8020)
Supplement: Supplemental Information 3 [file peerj-07-8020-s003.xlsx]

## Sheet: Table S1
Table S1 The primer sequences for qRT-PCR.
Protein Description	protein ID	gene ID	Up	Down
heat shock 70kDa protein 5	A0A2G2XX20	T459_34102	ATGAACTCGTGCTCGTTGGT	CCCCTTGTATTGCTGCTCCA
Heat shock 22 kDa protein	A0A2G3AEQ2	T459_00593	GACGCTTTCCCCAGCTTCTT	ACGTCCCATCCTCTCCTTGA
Small heat shock protein	A0A2G3A055	T459_09696	GTGCAGCATGTCAAAAACGGT	CCGCATTGTTCTCATGGGTG
18.5 kDa class I heat shock protein	A0A1U8E820	T459_32217	GAAGGAGACCCCACAAGCTC	TCCTGCTCTCTGCTCCTCTC
HSP40/DnaJ peptide-binding	A0A2G2YH15	T459_28486	GTACTCGGACATGGAGCTGG	CCACCACCAGGCATCTCTTC
16.6 kDa heat shock protein	A0A1U8FR15	T459_07099	TATTGAGCAGCAGTGACCCA	TCTTTGGTCAGCCCTGGAAG
18.5 kDa class I heat shock protein	A0A1U8E6M6	T459_32218	GCTGCCGGAGAATACGAAAAC	TTGCCTTGACCTCAGGTTTCT
17.9 kDa class II heat shock protein	A0A2G3A1B9	T459_10097	CTGTGAATGCCCCGTCTAGG	CAACCCCGGCATATCAACGA
18.5 kDa class I heat shock protein	A0A1U8DWR1	T459_32220	CGGTGAGAGGAGCAGAGAAC	TCGCCTTCACCTCAGGTTTC
Heat shock 22 kDa protein	A0A2G3AET1	T459_00592	TGAAGATGATCGCGGAGTCG	GAGCATCAGCATCCTCCCTC
15.7 kDa heat shock protein	A0A1U8GLK8	T459_13779	GAGGTGGCAAGAAGGACGAA	TCACATCTTCCGGCAACTCG
17.4 kDa class III heat shock protein	A0A1U8FTF7	T459_11007	GAGAACACGCTGGTGGTACA	GGCAGCCTGAACTTCCTCAT
Heat shock 70 kDa protein	A0A1U8FVW2	T459_10610	GATCTCGGCACGACCTACAG	CTGATTCTTGGCTGCATCGC
Heat shock cognate 70 kDa	A0A1U8GLV8	T459_13912	TGTTGGTGGCTCTACGAGGA	AGCTCCATATGCAACAGCCTC
CaACTIN	Capana12g001934	Capana12g001934	GCCCCTTGTTTGTGACAATG	ACACGAAGCTCATTGTAGAA
