# Supplementary material for: Comparative proteomic analysis of pepper (Capsicum annuum L.) seedlings under selenium stress
Source: PeerJ. 2019 Nov 27;7:e8020. doi: 10.7717/peerj.8020 (PMC6884995; doi:10.7717/peerj.8020)
Supplement: Supplemental Information 4 [file peerj-07-8020-s004.xlsx]

## Sheet: Table S2
TableS2.The detail information of all identified peptides
ID	Identified peptide index number
Sequence	Identified peptide amino acid sequence
Protein accession	Protein accession number of database used for search
Protein description	Protein functional description
Charge	Carried charge of peptide
m/z	Mass-to-charge ratio of peptide
mass error [ppm]	Parts per million ratio of peptide mass error between the theory and practice
PEP	The maximal posterior error probability for peptides
Score	A simple rule to be used to judge whether a result is significant or not
Unique [yes/no]	When marked with 'yes', this particular peptide is unique to a single identified protein group
ID	Sequence	Protein accession	Protein description	Charge	m/z	mass error [ppm]	PEP	Score	Unique [yes/no]	Mock_1	Mock_2	Mock_3	Se_1	Se_2	Se_3
0	AAAAAAADVAR	A0A2G2ZCJ2	Peroxisomal membrane protein PEX14 OS=Capsicum annuum OX=4072 GN=T459_17768	2	479.259	-1.9977	0.00049427	82.008	yes	1.005	0.917	0.825	1.109	1.081	1.063
1	AAAAADAVVLVMGSDQTIER	A0A2G2Y364	Beta-D-xylosidase 4 OS=Capsicum annuum OX=4072 GN=T459_32055	3	668.674	-0.97906	2.5752e-29	125.73	yes	1.072	0.91	0.985	0.994	1.017	1.022
2	AAAAADAVVLVMGSDQTIER	A0A2G2Y364	Beta-D-xylosidase 4 OS=Capsicum annuum OX=4072 GN=T459_32055	3	663.342	-0.9126	1.8832e-36	136.66	yes	0.896	0.93	0.967	1.217	0.89	1.1
3	AAAAADAVVLVMGSDQTIER	A0A2G2Y364	Beta-D-xylosidase 4 OS=Capsicum annuum OX=4072 GN=T459_32055	2	994.509	-0.68878	4.2742e-36	138.75	yes	1.078	0.796	1.016	1.011	1.03	1.069
4	AAAAAFQENVGR	A0A2G3AMI2	Tubulin-folding cofactor D OS=Capsicum annuum OX=4072 GN=T459_03328	2	602.807	-1.3968	5.2218e-05	93.839	yes	1.096	0.992	1.051	0.895	1.012	0.954
5	AAAAAFQENVGR	A0A2G3AMI2	Tubulin-folding cofactor D OS=Capsicum annuum OX=4072 GN=T459_03328	3	402.207	-0.21546	0.0051717	45.653	yes	NA	NA	NA	NA	NA	NA
6	AAAAAGLTVAEVTGSNTVSVAEDELMR	A0A2G3ABY2	Formate dehydrogenase, mitochondrial OS=Capsicum annuum OX=4072 GN=T459_06869	3	883.773	-1.1068	4.7187e-13	67.655	yes	0.983	0.88	0.925	0.917	1.063	1.231
7	AAAAAGLTVAEVTGSNTVSVAEDELMR	A0A2G3ABY2	Formate dehydrogenase, mitochondrial OS=Capsicum annuum OX=4072 GN=T459_06869	4	663.081	-0.50355	2.28e-06	45.679	yes	1.006	1.024	0.913	1.104	0.982	0.97
8	AAAAAGLTVAEVTGSNTVSVAEDELMR	A0A2G3ABY2	Formate dehydrogenase, mitochondrial OS=Capsicum annuum OX=4072 GN=T459_06869	3	883.773	-1.0401	9.5098e-17	77.675	yes	0.954	0.936	0.903	0.909	1.248	1.05
9	AAAAAGLTVAEVTGSNTVSVAEDELMR	A0A2G3ABY2	Formate dehydrogenase, mitochondrial OS=Capsicum annuum OX=4072 GN=T459_06869	3	878.441	-0.9861	6.4561e-79	154.13	yes	1.145	0.844	0.899	0.971	1.06	1.08
10	AAAAAGLTVAEVTGSNTVSVAEDELMR	A0A2G3ABY2	Formate dehydrogenase, mitochondrial OS=Capsicum annuum OX=4072 GN=T459_06869	4	659.083	-0.37727	1.1384e-21	80.786	yes	0.882	0.87	0.814	0.997	1.291	1.146
11	AAAADEEDGAVVVVGK	A0A1U8HGG2	Mitochondrial import receptor subunit TOM7-1 OS=Capsicum annuum OX=4072 GN=T459_19362	2	750.881	-1.4818	1.523e-05	69.92	yes	1.055	0.848	1.002	1	1.086	1.009
12	AAAADEEDGAVVVVGK	A0A1U8HGG2	Mitochondrial import receptor subunit TOM7-1 OS=Capsicum annuum OX=4072 GN=T459_19362	3	500.923	-1.0997	6.0702e-08	86.944	yes	0.993	0.867	0.985	1.026	1.134	0.996
13	AAAAGFEK	A0A2G2YYD6	Photosystem II CP43 reaction center protein OS=Capsicum annuum OX=4072 GN=T459_16087	3	255.469	0.84582	0.0086925	60.76	yes	1.17	1.08	0.963	0.904	0.988	0.896
14	AAAATQFGSGWAWLAYKPEDK	A0A1U8H5G9	Superoxide dismutase OS=Capsicum annuum OX=4072 GN=T459_16343	4	567.783	-1.2445	2.0716e-21	108.71	yes	1.126	1.04	1.027	0.894	1.051	0.862
15	AAAATQFGSGWAWLAYKPEDK	A0A1U8H5G9	Superoxide dismutase OS=Capsicum annuum OX=4072 GN=T459_16343	3	756.708	-0.99543	0.021057	28.333	yes	0.985	0.936	1.046	0.961	1.073	0.999
16	AAAATQFGSGWAWLAYKPEDK	A0A1U8H5G9	Superoxide dismutase OS=Capsicum annuum OX=4072 GN=T459_16343	3	756.708	-0.96011	3.1965e-37	137.61	yes	0.918	1	0.968	1.061	1.045	1.008
17	AAAATQFGSGWAWLAYKPEDK	A0A1U8H5G9	Superoxide dismutase OS=Capsicum annuum OX=4072 GN=T459_16343	4	567.783	-1.0237	2.5698e-07	63.125	yes	NA	NA	NA	NA	NA	NA
18	AAAATQFGSGWAWLAYKPEDK	A0A1U8H5G9	Superoxide dismutase OS=Capsicum annuum OX=4072 GN=T459_16343	3	756.708	-1.0013	2.1894e-09	70.094	yes	1.001	0.935	1.015	1.025	1.096	0.927
19	AAADGWSHLNIGK	A0A2G3A1W4	Putative acyl-activating enzyme 17, peroxisomal OS=Capsicum annuum OX=4072 GN=T459_10333	3	447.23	-1.8826	2.0053e-08	103.91	yes	NA	NA	NA	NA	NA	NA
20	AAADHVLR	A0A2G3A0B6	Exportin-1 OS=Capsicum annuum OX=4072 GN=T459_09764	3	284.828	-0.083741	0.0014619	103.83	yes	1.024	0.951	1.037	0.882	1.022	1.084
21	AAADHVLR	A0A2G3A0B6	Exportin-1 OS=Capsicum annuum OX=4072 GN=T459_09764	2	426.738	-0.71584	0.022305	70.69	yes	1.026	1.111	1.049	0.921	0.962	0.931
22	AAADPLVQNSNDAK	A0A2G2YH09	Methyl-CpG-binding domain-containing protein 11 OS=Capsicum annuum OX=4072 GN=T459_28530	3	471.904	0.35425	4.8789e-06	91.28	yes	0.958	0.924	0.986	0.988	1.105	1.039
23	AAADPLVQNSNDAK	A0A2G2YH09	Methyl-CpG-binding domain-containing protein 11 OS=Capsicum annuum OX=4072 GN=T459_28530	2	707.352	-0.60901	0.0012063	64.104	yes	0.906	0.957	0.97	0.94	1.088	1.14
24	AAAEDPLTK	A0A2G2YR93	Tropinone reductase 2 OS=Capsicum annuum OX=4072 GN=T459_23048	2	458.243	-1.5924	0.002899	85.355	yes	1.034	0.95	0.985	0.978	1.101	0.953
25	AAAELSSHDPPIVLAK	A0A1U8GX36	Protein disulfide-isomerase OS=Capsicum annuum OX=4072 GN=T459_16228	3	540.298	-0.42746	0.0048496	36.993	yes	NA	NA	NA	NA	NA	NA
26	AAAELSSHDPPIVLAK	A0A1U8GX36	Protein disulfide-isomerase OS=Capsicum annuum OX=4072 GN=T459_16228	3	540.298	-0.86784	5.911e-15	113.76	yes	0.99	0.909	1.169	0.925	0.996	1.01
27	AAAELSSHDPPIVLAK	A0A1U8GX36	Protein disulfide-isomerase OS=Capsicum annuum OX=4072 GN=T459_16228	4	405.475	0.52522	0.00065892	46.318	yes	NA	NA	NA	NA	NA	NA
28	AAAELSSHDPPIVLAK	A0A1U8GX36	Protein disulfide-isomerase OS=Capsicum annuum OX=4072 GN=T459_16228	3	540.298	-2.2508	1.2792e-06	75.764	yes	1.02	0.975	0.884	1.014	1.122	0.985
29	AAAELSSHDPPIVLAK	A0A1U8GX36	Protein disulfide-isomerase OS=Capsicum annuum OX=4072 GN=T459_16228	4	405.475	0.47303	2.1964e-06	69.92	yes	NA	NA	NA	NA	NA	NA
30	AAAFLHLVK	A0A2G2XX96	Uncharacterized protein OS=Capsicum annuum OX=4072 GN=T459_34020	3	323.868	0.61069	0.029356	37.727	yes	NA	NA	NA	NA	NA	NA
31	AAAGLFNWEEDIFVAR	A0A2G3AGT3	L-arabinokinase OS=Capsicum annuum OX=4072 GN=T459_01280	3	603.637	-0.67292	9.6325e-05	60.55	yes	NA	NA	NA	NA	NA	NA
32	AAAIAALSGVLTAEK	A0A2G2ZF64	Villin-2 OS=Capsicum annuum OX=4072 GN=T459_13668	3	462.605	-0.026364	1.4715e-20	126.1	yes	0.94	0.904	0.852	0.969	1.301	1.034
33	AAAIAALSGVLTAEK	A0A2G2ZF64	Villin-2 OS=Capsicum annuum OX=4072 GN=T459_13668	2	693.404	-0.65222	7.9164e-30	142.45	yes	0.961	0.875	0.922	1.074	1.156	1.012
34	AAAIAALSGVLTAEK	A0A2G2ZF64	Villin-2 OS=Capsicum annuum OX=4072 GN=T459_13668	3	462.605	0.3484	2.8513e-10	100.22	yes	NA	NA	NA	NA	NA	NA
35	AAAIEAAAR	A0A2G2YXG3	Uncharacterized protein OS=Capsicum annuum OX=4072 GN=T459_21711	2	422.238	-1.1488	0.010729	70.816	yes	NA	NA	NA	NA	NA	NA
36	AAAIGANNQAAQSILK	A0A1U8FNG0	Proteasome subunit alpha type OS=Capsicum annuum OX=4072 GN=T459_06029	3	514.286	-1.8609	1.0529e-20	122.64	yes	1.083	0.971	0.865	1.024	1.055	1.003
37	AAAIGANNQAAQSILK	A0A1U8FNG0	Proteasome subunit alpha type OS=Capsicum annuum OX=4072 GN=T459_06029	2	770.926	-2.5815	3.0293e-28	139.58	yes	0.993	0.899	0.883	1.015	1.146	1.064
38	AAAIGANNQAAQSILK	A0A1U8FNG0	Proteasome subunit alpha type OS=Capsicum annuum OX=4072 GN=T459_06029	3	514.614	-0.81943	5.8463e-07	77.776	yes	0.975	0.859	1.001	0.952	1.12	1.093
39	AAAIGANNQAAQSILK	A0A1U8FNG0	Proteasome subunit alpha type OS=Capsicum annuum OX=4072 GN=T459_06029	3	514.614	-1.0427	5.3507e-06	69.92	yes	NA	NA	NA	NA	NA	NA
40	AAAIVSAGGGFGGGR	A0A2G2YYF9	NAD(P)H:quinone oxidoreductase OS=Capsicum annuum OX=4072 GN=T459_22051	2	624.328	-1.8599	5.2966e-10	105.41	yes	1.038	0.927	0.969	1.055	0.998	1.012
41	AAAIVSTGYDFGGGR	B9VXZ6	NAD(P)H:quinone oxidoreductase OS=Capsicum annuum OX=4072 GN=NADPH	2	721.357	-0.74474	1.2471e-27	138.21	no	0.994	1.013	0.965	1.015	1.026	0.987
42	AAAIVSTGYDFGGGR	B9VXZ6	NAD(P)H:quinone oxidoreductase OS=Capsicum annuum OX=4072 GN=NADPH	3	481.241	-0.63675	4.5398e-07	78.401	no	0.918	1.001	0.937	1.197	1.077	0.87
43	AAAIVSTGYDFGGGR	B9VXZ6	NAD(P)H:quinone oxidoreductase OS=Capsicum annuum OX=4072 GN=NADPH	2	721.357	-1.1592	3.9038e-07	88.282	no	1.006	0.875	0.823	1.054	1.076	1.166
44	AAAIVSTGYDFGGGR	B9VXZ6	NAD(P)H:quinone oxidoreductase OS=Capsicum annuum OX=4072 GN=NADPH	3	481.241	-0.19356	0.00019083	57.267	no	0.628	0.665	0.777	0.824	2.224	0.882
45	AAAIVSTGYDFGGGR	B9VXZ6	NAD(P)H:quinone oxidoreductase OS=Capsicum annuum OX=4072 GN=NADPH	2	721.357	-1.5038	2.7419e-14	117.2	no	0.938	0.921	1.031	1.052	1.026	1.031
46	AAAIVSTGYDFGGGR	B9VXZ6	NAD(P)H:quinone oxidoreductase OS=Capsicum annuum OX=4072 GN=NADPH	2	721.357	-1.6393	1.3445e-06	81.703	no	NA	NA	NA	NA	NA	NA
47	AAAIVSTGYDFGGGR	B9VXZ6	NAD(P)H:quinone oxidoreductase OS=Capsicum annuum OX=4072 GN=NADPH	3	481.241	-1.4775	3.7374e-05	66.215	no	0.881	0.952	0.943	1.072	1.089	1.062
48	AAAIVSTGYDFGGGR	B9VXZ6	NAD(P)H:quinone oxidoreductase OS=Capsicum annuum OX=4072 GN=NADPH	2	721.357	-2.8313	9.5752e-20	123.1	no	0.989	0.983	0.922	1.059	0.937	1.11
49	AAAIVSTGYDFGGGR	B9VXZ6	NAD(P)H:quinone oxidoreductase OS=Capsicum annuum OX=4072 GN=NADPH	2	721.357	-0.83438	5.4475e-30	145.43	no	0.962	0.982	0.92	1.008	1.015	1.114
50	AAAIVSTGYDFGGGR	B9VXZ6	NAD(P)H:quinone oxidoreductase OS=Capsicum annuum OX=4072 GN=NADPH	3	481.241	0.62031	4.3908e-07	78.814	no	1.032	1.018	0.932	1.076	1.103	0.839
51	AAAIVSTGYDFGGGR	B9VXZ6	NAD(P)H:quinone oxidoreductase OS=Capsicum annuum OX=4072 GN=NADPH	2	721.357	-0.5819	8.4369e-14	110.55	no	0.972	1.029	0.996	0.963	1.019	1.02
52	AAAIVSTGYDFGGGR	B9VXZ6	NAD(P)H:quinone oxidoreductase OS=Capsicum annuum OX=4072 GN=NADPH	3	481.241	0.2314	0.00046103	54.09	no	0.93	0.993	0.937	1.117	1.004	1.018
53	AAAIVSTGYDFGGGR	B9VXZ6	NAD(P)H:quinone oxidoreductase OS=Capsicum annuum OX=4072 GN=NADPH	3	481.241	-0.15139	0.00046103	54.09	no	NA	NA	NA	NA	NA	NA
54	AAAIVSTGYDFGGGR	B9VXZ6	NAD(P)H:quinone oxidoreductase OS=Capsicum annuum OX=4072 GN=NADPH	2	721.357	-2.111	1.6475e-06	79.614	no	0.982	0.948	0.915	1.081	0.912	1.163
55	AAAIVSTGYDFGGGR	B9VXZ6	NAD(P)H:quinone oxidoreductase OS=Capsicum annuum OX=4072 GN=NADPH	3	481.241	-0.66479	0.0051769	37.657	no	NA	NA	NA	NA	NA	NA
56	AAAIVSTGYDFGGGR	B9VXZ6	NAD(P)H:quinone oxidoreductase OS=Capsicum annuum OX=4072 GN=NADPH	3	481.241	-0.98629	0.0036955	40.941	no	NA	NA	NA	NA	NA	NA
57	AAAIVSTGYDFGGGR	B9VXZ6	NAD(P)H:quinone oxidoreductase OS=Capsicum annuum OX=4072 GN=NADPH	2	721.357	-3.1401	0.0051022	46.318	no	0.926	0.938	0.99	1.039	1.016	1.092
58	AAAIVSTGYDFGGGR	B9VXZ6	NAD(P)H:quinone oxidoreductase OS=Capsicum annuum OX=4072 GN=NADPH	3	481.241	-1.9694	5.4466e-05	65.219	no	NA	NA	NA	NA	NA	NA
59	AAAIVSTGYDFGGGR	B9VXZ6	NAD(P)H:quinone oxidoreductase OS=Capsicum annuum OX=4072 GN=NADPH	3	481.241	0.51743	1.7092e-09	99.161	no	NA	NA	NA	NA	NA	NA
60	AAAIVSTGYDFGGGR	B9VXZ6	NAD(P)H:quinone oxidoreductase OS=Capsicum annuum OX=4072 GN=NADPH	3	481.241	-1.5357	6.5973e-11	107.65	no	1.065	1.002	0.966	0.909	1.094	0.964
61	AAAIVSTGYDFGGGR	B9VXZ6	NAD(P)H:quinone oxidoreductase OS=Capsicum annuum OX=4072 GN=NADPH	2	721.357	-2.9478	7.3391e-14	111.83	no	0.965	0.977	0.939	1.017	1.083	1.019
62	AAAIVSTGYDFGGGR	B9VXZ6	NAD(P)H:quinone oxidoreductase OS=Capsicum annuum OX=4072 GN=NADPH	3	481.241	-1.5544	0.014229	33.842	no	NA	NA	NA	NA	NA	NA
63	AAAIVSTGYDFGGGR	B9VXZ6	NAD(P)H:quinone oxidoreductase OS=Capsicum annuum OX=4072 GN=NADPH	3	481.241	-0.82736	2.152e-08	96.464	no	1.049	0.755	0.995	0.833	1.255	1.113
64	AAAIVSTGYDFGGGR	B9VXZ6	NAD(P)H:quinone oxidoreductase OS=Capsicum annuum OX=4072 GN=NADPH	2	721.357	-2.1919	1.7975e-33	155.43	no	1.017	1	0.973	0.97	1.04	1
65	AAAIVSTGYDFGGGR	B9VXZ6	NAD(P)H:quinone oxidoreductase OS=Capsicum annuum OX=4072 GN=NADPH	3	481.241	-1.6328	0.00067062	51.643	no	NA	NA	NA	NA	NA	NA
66	AAAIVSTGYDFGGGR	B9VXZ6	NAD(P)H:quinone oxidoreductase OS=Capsicum annuum OX=4072 GN=NADPH	3	481.241		4.052e-08	60.55	no	NA	NA	NA	NA	NA	NA
67	AAAIVSTGYDFGGGR	B9VXZ6	NAD(P)H:quinone oxidoreductase OS=Capsicum annuum OX=4072 GN=NADPH	3	481.241	0.44699	1.857e-08	96.866	no	NA	NA	NA	NA	NA	NA
68	AAAIVSTGYDFGGGR	B9VXZ6	NAD(P)H:quinone oxidoreductase OS=Capsicum annuum OX=4072 GN=NADPH	2	721.357	-1.1792	3.6312e-27	131.96	no	0.907	0.966	0.995	0.956	1.135	1.041
69	AAAIVSTGYDFGGGR	B9VXZ6	NAD(P)H:quinone oxidoreductase OS=Capsicum annuum OX=4072 GN=NADPH	2	721.357	-1.6211	2.1032e-07	92.265	no	NA	NA	NA	NA	NA	NA
70	AAAIVSTGYDFGGGR	B9VXZ6	NAD(P)H:quinone oxidoreductase OS=Capsicum annuum OX=4072 GN=NADPH	3	481.241		0.017273	29.355	no	NA	NA	NA	NA	NA	NA
71	AAAIVSTGYDFGGGR	B9VXZ6	NAD(P)H:quinone oxidoreductase OS=Capsicum annuum OX=4072 GN=NADPH	2	721.357	-1.1823	4.7102e-08	97.797	no	0.987	1	0.956	1.022	0.993	1.042
72	AAAIVSTGYDFGGGR	B9VXZ6	NAD(P)H:quinone oxidoreductase OS=Capsicum annuum OX=4072 GN=NADPH	3	481.241	-0.15227	4.1972e-06	74.475	no	0.918	1.032	0.877	1.119	0.981	1.073
73	AAAIVSTGYDFGGGR	B9VXZ6	NAD(P)H:quinone oxidoreductase OS=Capsicum annuum OX=4072 GN=NADPH	3	481.241	-0.63862	0.0001198	61.409	no	NA	NA	NA	NA	NA	NA
74	AAAIVSTGYDFGGGR	B9VXZ6	NAD(P)H:quinone oxidoreductase OS=Capsicum annuum OX=4072 GN=NADPH	3	481.241	-2.101	2.913e-08	95.428	no	0.894	0.78	0.994	0.831	1.336	1.164
75	AAAIVSTGYDFGGGR	B9VXZ6	NAD(P)H:quinone oxidoreductase OS=Capsicum annuum OX=4072 GN=NADPH	3	481.241	-0.29354	0.00039184	54.898	no	NA	NA	NA	NA	NA	NA
76	AAAIVSTGYDFGGGR	B9VXZ6	NAD(P)H:quinone oxidoreductase OS=Capsicum annuum OX=4072 GN=NADPH	2	721.357	-1.6923	1.4063e-27	137.8	no	1.034	1.043	0.927	0.961	1.074	0.962
77	AAALNIVPTSTGAAK	A0A2G2YA75	Glyceraldehyde-3-phosphate dehydrogenase OS=Capsicum annuum OX=4072 GN=T459_31090	3	462.265	-0.18032	2.8478e-07	83.087	no	NA	NA	NA	NA	NA	NA
78	AAALNIVPTSTGAAK	A0A2G2YA75	Glyceraldehyde-3-phosphate dehydrogenase OS=Capsicum annuum OX=4072 GN=T459_31090	2	692.893	-1.3946	3.8806e-06	77.776	no	0.957	0.979	0.958	1.089	0.926	1.092
79	AAALNIVPTSTGAAK	A0A2G2YA75	Glyceraldehyde-3-phosphate dehydrogenase OS=Capsicum annuum OX=4072 GN=T459_31090	3	462.265	-0.13824	2.8478e-07	83.087	no	1.001	0.919	0.985	1.06	1.045	0.991
80	AAALNIVPTSTGAAK	A0A2G2YA75	Glyceraldehyde-3-phosphate dehydrogenase OS=Capsicum annuum OX=4072 GN=T459_31090	2	692.893	-1.3647	7.9965e-10	103.14	no	1.014	0.908	0.972	0.993	1.106	1.008
81	AAALNIVPTSTGAAK	A0A2G2YA75	Glyceraldehyde-3-phosphate dehydrogenase OS=Capsicum annuum OX=4072 GN=T459_31090	4	346.95	0.14278	3.9037e-06	71.879	no	0.972	1.113	0.816	1.084	1.228	0.788
82	AAALNIVPTSTGAAK	A0A2G2YA75	Glyceraldehyde-3-phosphate dehydrogenase OS=Capsicum annuum OX=4072 GN=T459_31090	3	462.265	-0.21954	0.039372	26.825	no	NA	NA	NA	NA	NA	NA
83	AAALNIVPTSTGAAK	A0A2G2YA75	Glyceraldehyde-3-phosphate dehydrogenase OS=Capsicum annuum OX=4072 GN=T459_31090	3	462.265		0.0033359	36.993	no	NA	NA	NA	NA	NA	NA
84	AAALNIVPTSTGAAK	A0A2G2YA75	Glyceraldehyde-3-phosphate dehydrogenase OS=Capsicum annuum OX=4072 GN=T459_31090	2	692.893	-2.022	2.563e-07	90.707	no	0.942	0.872	0.92	1.088	1.156	1.022
85	AAALNIVPTSTGAAK	A0A2G2YA75	Glyceraldehyde-3-phosphate dehydrogenase OS=Capsicum annuum OX=4072 GN=T459_31090	3	462.265	-1.1412	0.00027258	56.29	no	NA	NA	NA	NA	NA	NA
86	AAALNIVPTSTGAAK	A0A2G2YA75	Glyceraldehyde-3-phosphate dehydrogenase OS=Capsicum annuum OX=4072 GN=T459_31090	3	462.265	-0.9527	4.3908e-07	78.814	no	0.421	0.577	0.786	0.62	2.778	0.819
87	AAALNIVPTSTGAAK	A0A2G2YA75	Glyceraldehyde-3-phosphate dehydrogenase OS=Capsicum annuum OX=4072 GN=T459_31090	2	692.893	-1.8279	0.00014798	66.246	no	0.502	0.563	0.759	0.618	2.722	0.836
88	AAALNIVPTSTGAAK	A0A2G2YA75	Glyceraldehyde-3-phosphate dehydrogenase OS=Capsicum annuum OX=4072 GN=T459_31090	3	462.265	-0.78575	8.6567e-06	69.92	no	NA	NA	NA	NA	NA	NA
89	AAALNIVPTSTGAAK	A0A2G2YA75	Glyceraldehyde-3-phosphate dehydrogenase OS=Capsicum annuum OX=4072 GN=T459_31090	2	692.893	-1.6621	0.012351	42.317	no	1.094	1.094	0.848	0.967	1.001	0.996
90	AAALNIVPTSTGAAK	A0A2G2YA75	Glyceraldehyde-3-phosphate dehydrogenase OS=Capsicum annuum OX=4072 GN=T459_31090	2	693.385	-1.6161	6.4896e-06	77.746	no	NA	NA	NA	NA	NA	NA
91	AAALNIVPTSTGAAK	A0A2G2YA75	Glyceraldehyde-3-phosphate dehydrogenase OS=Capsicum annuum OX=4072 GN=T459_31090	3	462.593	-0.63607	6.1959e-07	78.814	no	1.058	0.933	1.001	0.965	1.075	0.967
92	AAALNIVPTSTGAAK	A0A2G2YA75	Glyceraldehyde-3-phosphate dehydrogenase OS=Capsicum annuum OX=4072 GN=T459_31090	2	693.385	-1.187	1.8319e-07	95.57	no	0.932	0.993	1.02	1.008	1.056	0.991
93	AAALNIVPTSTGAAK	A0A2G2YA75	Glyceraldehyde-3-phosphate dehydrogenase OS=Capsicum annuum OX=4072 GN=T459_31090	2	693.385	-0.95785	1.5538e-10	109.07	no	0.995	0.974	0.927	0.96	1.073	1.071
94	AAALQQGVAPFEEK	A0A1U8EJF5	4-hydroxy-3-methylbut-2-en-1-yl diphosphate synthase (Ferredoxin), chloroplastic OS=Capsicum annuum OX=4072 GN=T459_28778	2	729.883	-1.9397	2.4554e-05	89.231	yes	1.151	1.056	1.121	0.874	0.944	0.854
95	AAALQQGVAPFEEK	A0A1U8EJF5	4-hydroxy-3-methylbut-2-en-1-yl diphosphate synthase (Ferredoxin), chloroplastic OS=Capsicum annuum OX=4072 GN=T459_28778	3	486.924	-0.8656	0.0014774	50.088	yes	1.158	1.145	1.071	0.947	0.959	0.72
96	AAALQQGVAPFEEK	A0A1U8EJF5	4-hydroxy-3-methylbut-2-en-1-yl diphosphate synthase (Ferredoxin), chloroplastic OS=Capsicum annuum OX=4072 GN=T459_28778	4	365.445	-0.10629	0.027878	25.448	yes	NA	NA	NA	NA	NA	NA
97	AAALVSQPALYSK	A0A2G2XW31	Monosaccharide-sensing protein 1 OS=Capsicum annuum OX=4072 GN=T459_34411	3	440.25	-0.73684	0.00010723	79.492	yes	NA	NA	NA	NA	NA	NA
98	AAALVSQPALYSK	A0A2G2XW31	Monosaccharide-sensing protein 1 OS=Capsicum annuum OX=4072 GN=T459_34411	2	659.872	-1.7505	4.6653e-14	129.37	yes	0.994	0.921	1.022	0.945	1.126	0.991
99	AAAMALAQHPVVNSSCK	A0A1U8EIE7	Dihydrolipoamide acetyltransferase component of pyruvate dehydrogenase complex OS=Capsicum annuum OX=4072 GN=T459_26871	3	585.627	-1.475	7.6854e-13	98.676	yes	0.944	0.978	1.02	1.014	1.05	0.993
100	AAAMALAQHPVVNSSCK	A0A1U8EIE7	Dihydrolipoamide acetyltransferase component of pyruvate dehydrogenase complex OS=Capsicum annuum OX=4072 GN=T459_26871	4	439.472	-0.22587	3.9583e-05	59.709	yes	NA	NA	NA	NA	NA	NA
101	AAANFTK	A0A1U8H5Z0	Uncharacterized protein OS=Capsicum annuum OX=4072 GN=T459_16161	2	361.695	-1.9629	0.024564	82.452	yes	0.871	0.77	0.826	1.118	1.2	1.215
102	AAANTYCQLLQSQSDNNVK	A0A1U8EGF1	Coatomer subunit beta OS=Capsicum annuum OX=4072 GN=T459_03385	3	709.332	-1.1091	7.1811e-06	61.477	no	NA	NA	NA	NA	NA	NA
103	AAANTYCQLLQSQSDNNVK	A0A1U8EGF1	Coatomer subunit beta OS=Capsicum annuum OX=4072 GN=T459_03385	3	709.004	-2.0497	2.0738e-08	69.188	no	1.085	1.093	0.979	0.98	0.978	0.885
104	AAAPYFGIK	A0A2G2Y1D5	Nudix hydrolase 24, chloroplastic OS=Capsicum annuum OX=4072 GN=T459_32625	3	313.176	0.023054	0.010479	49.097	yes	NA	NA	NA	NA	NA	NA
105	AAASAAQLAVNGGVK	A0A1U8HCP1	Probable bifunctional methylthioribulose-1-phosphate dehydratase/enolase-phosphatase E1 OS=Capsicum annuum OX=4072 GN=T459_20627	2	665.354	-1.0784	0.023311	54.898	yes	0.955	0.98	0.96	1.009	1.127	0.97
106	AAASAAQLAVNGGVK	A0A1U8HCP1	Probable bifunctional methylthioribulose-1-phosphate dehydratase/enolase-phosphatase E1 OS=Capsicum annuum OX=4072 GN=T459_20627	2	665.354	-2.5046	0.031453	53.3	yes	1.045	0.885	0.998	0.961	1.129	0.983
107	AAASDQLEIWAER	A0A1U8GX13	Cell division protein FtsY-like protein, chloroplastic OS=Capsicum annuum OX=4072 GN=T459_01326	2	730.362	-1.7525	5.3125e-14	128.22	yes	1.101	0.951	0.984	0.958	0.937	1.07
108	AAAVNADTGAPTIFDK	A0A1U8FU10	Histidine triad nucleotide-binding protein 2, mitochondrial OS=Capsicum annuum OX=4072 GN=T459_04945	3	521.267	-1.1685	1.7061e-07	79.652	yes	0.917	0.966	0.9	0.96	1.112	1.146
109	AAAVNADTGAPTIFDK	A0A1U8FU10	Histidine triad nucleotide-binding protein 2, mitochondrial OS=Capsicum annuum OX=4072 GN=T459_04945	2	781.396	-1.9309	3.3895e-20	124.29	yes	1.062	0.965	1.072	0.95	0.976	0.974
110	AAAYGEVVK	A0A2G2ZFG2	Nuclear pore protein OS=Capsicum annuum OX=4072 GN=T459_13689	2	454.248	-2.8252	0.008054	74.376	yes	NA	NA	NA	NA	NA	NA
111	AADAGVDAIIVQGR	A0A2G2Y3J6	Uncharacterized protein OS=Capsicum annuum OX=4072 GN=T459_32014	3	452.581	-0.43167	2.7462e-05	83.204	yes	0.967	0.761	1.01	1.064	1.153	1.044
112	AADASVYSPELLANK	A0A2G2ZSZ8	Uncharacterized protein OS=Capsicum annuum OX=4072 GN=T459_13541	3	516.935	-1.4377	1.455e-07	86.944	yes	NA	NA	NA	NA	NA	NA
113	AADEGLVIIQSPR	A0A2G2ZBU7	Uncharacterized protein OS=Capsicum annuum OX=4072 GN=T459_17501	2	684.878	-1.6923	8.7619e-05	88.075	yes	0.987	0.986	1.028	0.963	1.003	1.033
114	AADELRK	A0A2G2ZI14	Transketolase, chloroplastic OS=Capsicum annuum OX=4072 GN=T459_14631	3	268.152	-1.1097	0.048014	40.103	no	NA	NA	NA	NA	NA	NA
115	AADFSTDDLILEK	A0A1U8HAC6	Chloroplast stem-loop binding protein of 41 kDa b, chloroplastic OS=Capsicum annuum OX=4072 GN=T459_17973	2	719.359	-1.1753	0.003869	59.227	yes	NA	NA	NA	NA	NA	NA
116	AADFSTDDLILEK	A0A1U8HAC6	Chloroplast stem-loop binding protein of 41 kDa b, chloroplastic OS=Capsicum annuum OX=4072 GN=T459_17973	3	479.908	-0.072388	0.0032312	46.069	yes	NA	NA	NA	NA	NA	NA
117	AADFSTDDLILEK	A0A1U8HAC6	Chloroplast stem-loop binding protein of 41 kDa b, chloroplastic OS=Capsicum annuum OX=4072 GN=T459_17973	3	479.908	-0.22882	0.00015496	70.089	yes	0.999	0.89	0.946	0.955	1.214	0.995
118	AADFSTDDLILEK	A0A1U8HAC6	Chloroplast stem-loop binding protein of 41 kDa b, chloroplastic OS=Capsicum annuum OX=4072 GN=T459_17973	2	719.359	-1.1563	1.1932e-25	162.93	yes	1.035	0.927	0.925	1.012	1.08	1.02
119	AADGDIVSAIMELTN	A0A1U8FFI1	Nascent polypeptide-associated complex subunit alpha-like protein 3 OS=Capsicum annuum OX=4072 GN=T459_26407	3	512.58	-0.3255	2.4096e-06	74.987	no	1.078	0.898	0.876	1.008	1.051	1.089
120	AADHDVPVTPDEIVR	A0A2G3ALU1	Phosphoribosylaminoimidazole-succinocarboxamide synthase OS=Capsicum annuum OX=4072 GN=T459_03062	3	545.278	-0.50888	0.00084612	49.595	yes	1.08	1	0.834	0.999	1.15	0.937
121	AADHVNTDK	A0A1U8HCH6	50S ribosomal protein L13 OS=Capsicum annuum OX=4072 GN=T459_20528	3	324.158	0.14627	0.025721	39.622	no	NA	NA	NA	NA	NA	NA
122	AADHVNTDKPWYIVDATDK	A0A1U8E5A8	50S ribosomal protein L13 OS=Capsicum annuum OX=4072 GN=T459_23835	4	540.516	-0.95058	0.024589	25.186	yes	NA	NA	NA	NA	NA	NA
123	AADIPSTSNVGR	A0A2G3A839	Putative F-box/LRR-repeat protein 8 OS=Capsicum annuum OX=4072 GN=T459_05456	2	594.304	-1.9526	0.0051198	56.551	yes	0.454	0.441	0.437	1.489	1.626	1.554
124	AADISTDLK	A0A2G3AD20	Putative inactive shikimate kinase like 1, chloroplastic OS=Capsicum annuum OX=4072 GN=T459_07203	2	467.248	-1.7043	0.0016176	93.096	yes	NA	NA	NA	NA	NA	NA
125	AADKFEPINIEGQR	A0A2G2Z4M9	C2 domain-containing protein OS=Capsicum annuum OX=4072 GN=T459_20499	3	529.942	-1.7308	0.00061005	62.357	yes	1.021	1.101	1.057	0.924	0.972	0.926
126	AADKYHGVAK	A0A2G3ALC4	1-deoxy-D-xylulose-5-phosphate synthase, chloroplastic OS=Capsicum annuum OX=4072 GN=T459_02911	4	265.645	-1.0799	0.027738	33.875	yes	NA	NA	NA	NA	NA	NA
127	AADLDVASVLGMSFPSYR	A0A2G2YUJ3	Glyoxysomal fatty acid beta-oxidation multifunctional protein MFP-a OS=Capsicum annuum OX=4072 GN=T459_24205	3	633.649	-0.51279	1.3263e-07	69.979	yes	0.909	0.962	1.042	0.92	1.171	0.996
128	AADLFQSEDITSSANQCK	A0A1U8GZ48	Alpha-soluble NSF attachment protein OS=Capsicum annuum OX=4072 GN=T459_15118	3	662.302	-1.767	4.5635e-24	123.08	yes	0.974	0.871	0.842	1.061	1.074	1.179
129	AADLFQSEDITSSANQCK	A0A1U8GZ48	Alpha-soluble NSF attachment protein OS=Capsicum annuum OX=4072 GN=T459_15118	3	662.302	-1.4673	2.7423e-18	110.32	yes	0.978	0.915	1.021	1.01	1.005	1.072
130	AADLGVESIVIGMPHR	A0A1U8F591	2-oxoglutarate dehydrogenase, mitochondrial OS=Capsicum annuum OX=4072 GN=T459_15471	3	555.631	-0.38214	8.5127e-07	76.759	yes	0.729	0.918	0.917	1.235	1.149	1.051
131	AADLTISPVHR	A0A1U8EV20	DNA ligase OS=Capsicum annuum OX=4072 GN=T459_28705	3	393.888		0.017798	34.695	yes	NA	NA	NA	NA	NA	NA
132	AADLTYWESAAR	A0A1U8FQ24	UDP-glucose 6-dehydrogenase OS=Capsicum annuum OX=4072 GN=T459_07048	3	451.886	-0.17514	0.013382	38.27	yes	NA	NA	NA	NA	NA	NA
133	AADLYNLQILSSGIQDDSSNVTR	A0A2G2YHC2	Arogenate dehydratase OS=Capsicum annuum OX=4072 GN=T459_28633	3	827.414	-1.0943	0.0010431	35.812	yes	NA	NA	NA	NA	NA	NA
134	AADNIAANLYSVK	A0A2G3A4M3	Photosystem II stability/assembly factor, chloroplastic OS=Capsicum annuum OX=4072 GN=T459_04298	3	450.902	-0.54895	0.0021312	54.898	yes	0.865	0.86	0.941	1.134	1.168	1.032
135	AADNIAANLYSVK	A0A2G3A4M3	Photosystem II stability/assembly factor, chloroplastic OS=Capsicum annuum OX=4072 GN=T459_04298	2	675.849	-0.56839	5.5468e-08	107.35	yes	0.881	0.915	0.991	1.044	1.131	1.039
136	AADNIAANLYSVK	A0A2G3A4M3	Photosystem II stability/assembly factor, chloroplastic OS=Capsicum annuum OX=4072 GN=T459_04298	3	450.574	0.28649	0.0010481	58.32	yes	NA	NA	NA	NA	NA	NA
137	AADNIAANLYSVK	A0A2G3A4M3	Photosystem II stability/assembly factor, chloroplastic OS=Capsicum annuum OX=4072 GN=T459_04298	3	450.574	0.098343	0.033761	30.332	yes	NA	NA	NA	NA	NA	NA
138	AADPHVLPAMDVSYADGSK	A0A2G3AE81	Uncharacterized protein OS=Capsicum annuum OX=4072 GN=T459_00431	3	653.975	-1.8507	5.1309e-06	58.024	yes	0.903	1	0.94	1.045	1.078	1.034
139	AADPHVLPAMDVSYADGSK	A0A2G3AE81	Uncharacterized protein OS=Capsicum annuum OX=4072 GN=T459_00431	3	653.975	-1.6583	6.2502e-07	66.606	yes	0.963	0.926	0.978	1.002	1.109	1.022
140	AADPHVLPAMDVSYADGSK	A0A2G3AE81	Uncharacterized protein OS=Capsicum annuum OX=4072 GN=T459_00431	3	648.644	-1.7619	6.0096e-06	60.334	yes	0.934	1.006	1.027	0.973	1.01	1.05
141	AADSSQPSSVITSSDKDIVPDDEFSLAK	A0A2G2ZMJ9	Uncharacterized protein OS=Capsicum annuum OX=4072 GN=T459_11660	4	728.103	-2.2947	3.0344e-09	56.172	yes	0.982	0.816	0.95	1.056	1.126	1.07
142	AADVGADLVGK	A0A2G2Z0I3	Pyrophosphate-energized vacuolar membrane proton pump OS=Capsicum annuum OX=4072 GN=T459_19030	2	508.275	-1.916	1.2596e-08	128.85	no	1.012	0.857	0.924	1.023	1.222	0.962
143	AADVGADLVGK	A0A2G2Z0I3	Pyrophosphate-energized vacuolar membrane proton pump OS=Capsicum annuum OX=4072 GN=T459_19030	3	339.185	0.18657	0.014187	40.727	no	NA	NA	NA	NA	NA	NA
144	AADVIAAANTAAEVALR	A0A1U8H2T8	Proliferation-associated protein 2G4 OS=Capsicum annuum OX=4072 GN=T459_33207	2	813.944	-1.2407	0.0032169	46.892	yes	0.904	0.833	1.091	1.081	0.99	1.101
145	AADWSENVAPFWPAVIK	A0A2G3AFP9	Tocopherol O-methyltransferase, chloroplastic OS=Capsicum annuum OX=4072 GN=T459_00941	3	634.325	-1.1783	0.00075581	47.548	yes	NA	NA	NA	NA	NA	NA
146	AAEAFLYEK	A0A2G2ZAV6	Flotillin-like protein 3 OS=Capsicum annuum OX=4072 GN=T459_17126	2	521.266	-1.9626	0.00093271	105.98	yes	0.388	0.404	0.378	1.576	1.611	1.642
147	AAEAQQGFWNCPCVPMR	A0A2G3AC23	Ferredoxin-thioredoxin reductase, catalytic chain OS=Capsicum annuum OX=4072 GN=T459_06897	3	679.962	-1.5823	3.6425e-05	61.186	yes	0.991	0.871	1.092	0.941	1.103	1.002
148	AAEAQQGFWNCPCVPMR	A0A2G3AC23	Ferredoxin-thioredoxin reductase, catalytic chain OS=Capsicum annuum OX=4072 GN=T459_06897	2	1011.44	-0.054054	1.6884e-30	132.84	yes	1.138	0.851	0.943	1	1.109	0.959
149	AAEAQQGFWNCPCVPMR	A0A2G3AC23	Ferredoxin-thioredoxin reductase, catalytic chain OS=Capsicum annuum OX=4072 GN=T459_06897	3	674.631	-0.47973	5.7195e-11	86.548	yes	0.975	0.95	0.971	1.033	1.153	0.917
150	AAEDADVYHDLVK	A0A2G2ZWP4	Clathrin heavy chain OS=Capsicum annuum OX=4072 GN=T459_08518	3	482.568	-0.45839	0.00015022	71.176	no	1.076	0.954	0.947	1.009	1.037	0.976
151	AAEDPEFETFYTK	J7H3S6	Photosystem II D2 protein OS=Capsicum annuum OX=4072 GN=psbD	2	774.349	-1.5908	0.00095518	66.989	yes	0.985	0.905	1.019	0.997	1.02	1.074
152	AAEDPEFETFYTK	J7H3S6	Photosystem II D2 protein OS=Capsicum annuum OX=4072 GN=psbD	3	516.568	-1.1451	0.001734	53.448	yes	0.986	0.956	0.942	1.038	1.115	0.964
153	AAEDPEFETFYTK	J7H3S6	Photosystem II D2 protein OS=Capsicum annuum OX=4072 GN=psbD	2	774.349	-1.8105	0.0005175	76.073	yes	1.034	0.971	0.98	0.968	1.064	0.983
154	AAEDPEFETFYTK	J7H3S6	Photosystem II D2 protein OS=Capsicum annuum OX=4072 GN=psbD	4	387.678	0.030526	0.011987	33.589	yes	NA	NA	NA	NA	NA	NA
155	AAEDPEFETFYTK	J7H3S6	Photosystem II D2 protein OS=Capsicum annuum OX=4072 GN=psbD	3	516.568	-0.52342	0.028374	31.675	yes	NA	NA	NA	NA	NA	NA
156	AAEDPEFETFYTK	J7H3S6	Photosystem II D2 protein OS=Capsicum annuum OX=4072 GN=psbD	2	774.349	-1.2459	0.00049801	77.185	yes	0.978	0.893	0.954	1.037	1.05	1.088
157	AAEDPEFETFYTK	J7H3S6	Photosystem II D2 protein OS=Capsicum annuum OX=4072 GN=psbD	2	774.349	-1.4091	8.6767e-13	119.25	yes	1.055	0.926	1.093	0.939	1.1	0.885
158	AAEDPEFETFYTK	J7H3S6	Photosystem II D2 protein OS=Capsicum annuum OX=4072 GN=psbD	3	516.568	-0.71897	0.0077566	39.73	yes	0.989	0.986	1.131	0.986	0.967	0.941
159	AAEDPEFETFYTK	J7H3S6	Photosystem II D2 protein OS=Capsicum annuum OX=4072 GN=psbD	2	774.349	-1.1708	0.0085451	50.897	yes	0.375	0.545	0.769	0.559	2.835	0.916
160	AAEDPEFETFYTK	J7H3S6	Photosystem II D2 protein OS=Capsicum annuum OX=4072 GN=psbD	3	516.568	-0.48942	0.0043437	44.511	yes	NA	NA	NA	NA	NA	NA
161	AAEDPEFETFYTK	J7H3S6	Photosystem II D2 protein OS=Capsicum annuum OX=4072 GN=psbD	3	516.568	-1.1642	0.00078728	61.11	yes	0.927	0.966	0.987	0.941	1.116	1.063
162	AAEDPEFETFYTK	J7H3S6	Photosystem II D2 protein OS=Capsicum annuum OX=4072 GN=psbD	3	516.568	-1.4988	0.009268	37.613	yes	NA	NA	NA	NA	NA	NA
163	AAEDPEFETFYTK	J7H3S6	Photosystem II D2 protein OS=Capsicum annuum OX=4072 GN=psbD	3	516.568	-1.8254	0.0017978	53.034	yes	NA	NA	NA	NA	NA	NA
164	AAEDPEFETFYTK	J7H3S6	Photosystem II D2 protein OS=Capsicum annuum OX=4072 GN=psbD	2	774.349	-2.2155	4.2421e-05	91.62	yes	1.011	0.909	1.006	0.978	1.052	1.045
165	AAEDPEFETFYTK	J7H3S6	Photosystem II D2 protein OS=Capsicum annuum OX=4072 GN=psbD	2	774.349	-2.0467	0.0075047	52.576	yes	1.062	0.802	1.065	0.931	1.139	1.001
166	AAEDSFFDIIR	A0A1U8EIA7	Uncharacterized protein OS=Capsicum annuum OX=4072 GN=T459_27741	2	642.317	-1.1025	0.0089333	55.353	yes	NA	NA	NA	NA	NA	NA
167	AAEEVIYGR	A0A2G3ADA6	Uncharacterized protein OS=Capsicum annuum OX=4072 GN=T459_00114	2	504.261	1.4921	0.017909	59.931	yes	0.997	1.015	0.951	0.978	1.067	0.992
168	AAEEVLYSGR	A0A2G2Z858	ATP-dependent zinc metalloprotease FTSH 7, chloroplastic OS=Capsicum annuum OX=4072 GN=T459_16239	2	547.777	-1.1769	0.0044311	71.066	yes	1.023	1.035	0.96	0.996	0.981	1.006
169	AAEEYVIAGWAPK	A0A089FZ95	Dehydroascorbate reductase OS=Capsicum annuum OX=4072 GN=DHAR	3	468.91	-2.4282	1.1933e-05	90.614	yes	1.015	0.975	0.976	0.98	1.05	1.003
170	AAEEYVIAGWAPK	A0A089FZ95	Dehydroascorbate reductase OS=Capsicum annuum OX=4072 GN=DHAR	2	702.862	-3.1781	4.6653e-14	129.37	yes	1.036	0.997	1.013	0.937	1.057	0.96
171	AAEEYVIAGWAPK	A0A089FZ95	Dehydroascorbate reductase OS=Capsicum annuum OX=4072 GN=DHAR	4	351.934	-1.5583	4.982e-05	81.625	yes	1.167	0.898	1.081	0.973	0.976	0.906
172	AAEIFGQENK	A0A2G2XZK4	Uncharacterized protein OS=Capsicum annuum OX=4072 GN=T459_33383	2	553.777	-1.0327	0.0094848	58.699	yes	1.001	0.94	1.035	0.961	1.068	0.995
173	AAEILGHK	A0A1U8G367	Fumarate hydratase, mitochondrial OS=Capsicum annuum OX=4072 GN=T459_08155	3	280.164	0.34878	0.044213	36.395	no	NA	NA	NA	NA	NA	NA
174	AAELANVSYALADDSTK	A0A1U8E9L7	Probable alanine--tRNA ligase, chloroplastic OS=Capsicum annuum OX=4072 GN=T459_33568	3	580.288	-1.9604	2.1742e-05	65.231	yes	1.088	0.981	0.922	0.961	0.925	1.123
175	AAELANVSYALADDSTK	A0A1U8E9L7	Probable alanine--tRNA ligase, chloroplastic OS=Capsicum annuum OX=4072 GN=T459_33568	3	580.288	-0.80573	2.0017e-12	97.502	yes	0.974	0.923	1.029	0.996	1.099	0.978
176	AAELAVSSVQALLLR	A0A2G3AAM2	Pyridoxal kinase OS=Capsicum annuum OX=4072 GN=T459_06425	3	514.307	0.11465	2.152e-08	96.464	yes	1.048	0.909	0.953	1.059	1.078	0.952
177	AAELAYFLR	J7HAS1	Photosystem I assembly protein Ycf4 OS=Capsicum annuum OX=4072 GN=ycf4	2	527.29	-0.13416	0.014607	65.224	yes	1.039	1.022	1.043	0.963	0.958	0.975
178	AAELAYFLR	J7HAS1	Photosystem I assembly protein Ycf4 OS=Capsicum annuum OX=4072 GN=ycf4	3	351.862	0.86186	0.0025075	71.692	yes	1.022	1.012	0.826	0.874	1.163	1.103
179	AAELMVEFFQR	A0A1U8GCL2	Sucrose synthase OS=Capsicum annuum OX=4072 GN=T459_08242	3	447.56	0.67515	1.5848e-09	133.81	yes	0.9	1.067	0.875	1.098	1.154	0.906
180	AAELTSLLESR	A0A2G2Z291	ATP synthase subunit alpha, mitochondrial OS=Capsicum annuum OX=4072 GN=T459_19615	2	595.325	-4.0816	3.8197e-05	93.614	no	NA	NA	NA	NA	NA	NA
181	AAELTSLLESR	A0A2G2Z291	ATP synthase subunit alpha, mitochondrial OS=Capsicum annuum OX=4072 GN=T459_19615	3	397.219	-2.7699	0.00041891	70.942	no	0.76	0.976	1.257	0.746	0.816	1.445
182	AAELTSLLESR	A0A2G2Z291	ATP synthase subunit alpha, mitochondrial OS=Capsicum annuum OX=4072 GN=T459_19615	2	595.325	-0.81513	5.5856e-09	134.75	no	0.975	0.907	0.995	0.983	1.17	0.97
183	AAELTSLLESR	A0A2G2Z291	ATP synthase subunit alpha, mitochondrial OS=Capsicum annuum OX=4072 GN=T459_19615	3	397.219	0.59587	7.2649e-09	118.28	no	1.202	0.853	0.944	1.162	0.966	0.873
184	AAELYGLQILSEGIQDDSSNVTR	A0A2G2ZDQ1	Arogenate dehydratase OS=Capsicum annuum OX=4072 GN=T459_18083	3	827.082	-1.1304	0.0004422	40.533	yes	NA	NA	NA	NA	NA	NA
185	AAEMADVYLR	A0A2G3A2Z0	Uncharacterized protein OS=Capsicum annuum OX=4072 GN=T459_10711	2	569.782	-0.71815	0.0044311	71.066	yes	1.008	0.952	1.006	1.042	0.964	1.028
186	AAENVYIK	A0A2G2YH73	Uncharacterized protein OS=Capsicum annuum OX=4072 GN=T459_28591	3	303.168	-0.92303	0.029451	42.599	yes	NA	NA	NA	NA	NA	NA
187	AAENVYIK	A0A2G2YH73	Uncharacterized protein OS=Capsicum annuum OX=4072 GN=T459_28591	2	454.248	-2.0469	0.039176	57.59	yes	NA	NA	NA	NA	NA	NA
188	AAEQGPGKDEL	A0A1U8GVQ2	Protein disulfide-isomerase OS=Capsicum annuum OX=4072 GN=T459_16875	3	372.184	0.1191	0.0050726	52.247	yes	NA	NA	NA	NA	NA	NA
189	AAEQVLIGK	A0A2G2YRB5	ATP-dependent zinc metalloprotease FTSH 3, mitochondrial OS=Capsicum annuum OX=4072 GN=T459_23000	2	464.777	-2.2372	0.018677	58.699	yes	NA	NA	NA	NA	NA	NA
190	AAETELLTR	A0A1U8EPI6	Uncharacterized protein OS=Capsicum annuum OX=4072 GN=T459_03657	2	502.275	-0.66702	0.029212	53.756	yes	1.055	0.923	0.918	0.989	1.074	1.04
191	AAETFTAIGYK	A0A1U8FV12	Uncharacterized protein OS=Capsicum annuum OX=4072 GN=T459_05277	2	586.303	-2.2094	0.0032213	64.82	yes	1.087	0.964	0.965	0.988	1.005	0.991
192	AAETLLQDR	A0A2G3A9V6	Uncharacterized protein OS=Capsicum annuum OX=4072 GN=T459_06142	2	508.772	-1.3615	0.0017646	89.886	yes	1.034	0.941	1.038	0.967	1.057	0.964
193	AAETSFSASSSDDLTSK	A0A2G2YEX8	Alpha-glucan water dikinase, chloroplastic OS=Capsicum annuum OX=4072 GN=T459_27784	2	852.384	-1.5178	3.3843e-05	66.809	yes	1.083	0.995	0.954	1.081	0.993	0.895
194	AAEVVDQVNQWAK	A0A2G2ZRV1	Serpin-ZX OS=Capsicum annuum OX=4072 GN=T459_13127	3	486.584	-0.9266	0.0077566	39.73	yes	0.889	0.844	0.935	1.088	1.129	1.114
195	AAEWGLVLK	A0A2G2YGJ9	Phototropin-2 (Fragment) OS=Capsicum annuum OX=4072 GN=T459_28332	2	493.787	-0.20519	0.00013061	136.57	yes	NA	NA	NA	NA	NA	NA
196	AAEWGLVLK	A0A2G2YGJ9	Phototropin-2 (Fragment) OS=Capsicum annuum OX=4072 GN=T459_28332	3	329.527	1.0791	0.015876	44.753	yes	NA	NA	NA	NA	NA	NA
197	AAFAGHDHINDFCGK	A0A2G2YHG9	Putative inactive purple acid phosphatase 14 OS=Capsicum annuum OX=4072 GN=T459_28689	4	415.689	-0.85049	5.519e-06	69.03	yes	0.991	0.924	1.134	0.962	1.004	0.985
198	AAFAGHDHINDFCGK	A0A2G2YHG9	Putative inactive purple acid phosphatase 14 OS=Capsicum annuum OX=4072 GN=T459_28689	3	553.916		1.7483e-13	79.875	yes	NA	NA	NA	NA	NA	NA
199	AAFATIAIGNGR	A0A1U8EHJ3	Photosynthetic NDH subunit of lumenal location 1, chloroplastic OS=Capsicum annuum OX=4072 GN=T459_25214	2	581.814	-1.7356	2.2449e-07	102.28	yes	NA	NA	NA	NA	NA	NA
200	AAFDDFILPTK	A0A2G2Z615	Uridine kinase OS=Capsicum annuum OX=4072 GN=T459_20955	2	619.327	-1.6975	0.00088611	77.062	yes	0.815	0.917	0.838	1.08	1.176	1.175
201	AAFDDFILPTK	A0A2G2Z615	Uridine kinase OS=Capsicum annuum OX=4072 GN=T459_20955	3	413.22	0.21054	0.0024356	54.784	yes	0.941	0.799	0.832	1.02	1.307	1.101
202	AAFEEAEK	A0A2G2XVN9	Calreticulin OS=Capsicum annuum OX=4072 GN=T459_34591	2	447.714	-3.2319	0.0072885	117.89	yes	1.044	1.008	0.922	0.935	1.035	1.058
203	AAFEFFDK	Q5EDD1	Calcium-dependent protein kinase 32 OS=Capsicum annuum OX=4072 GN=CDPK4	2	487.735	-1.3287	0.0040196	130.75	yes	0.802	0.794	0.878	1.097	1.231	1.198
204	AAFEFFDK	Q5EDD1	Calcium-dependent protein kinase 32 OS=Capsicum annuum OX=4072 GN=CDPK4	3	325.492	0.1891	0.012738	54.157	yes	NA	NA	NA	NA	NA	NA
205	AAFEVFSGK	F2YL87	Lipoxygenase OS=Capsicum annuum OX=4072 GN=LOX	2	478.248	-1.5044	0.00082362	107.79	no	0.895	0.878	0.917	1.103	1.12	1.087
206	AAFEVFSGK	F2YL87	Lipoxygenase OS=Capsicum annuum OX=4072 GN=LOX	3	319.168	0.35629	0.02633	39.305	no	1.134	0.869	1.034	0.798	1.203	0.963
207	AAFEVFSGK	F2YL87	Lipoxygenase OS=Capsicum annuum OX=4072 GN=LOX	2	478.248	-0.77637	0.012209	68.847	no	0.759	0.759	0.791	1.11	1.364	1.217
208	AAFHVVK	A0A1U8GPR1	Uncharacterized protein OS=Capsicum annuum OX=4072 GN=T459_28896	3	257.822	-0.3488	0.015842	56.51	yes	0.987	1.027	0.942	0.958	1.124	0.962
209	AAFNNPER	A0A2G2ZHN0	Ubiquitin receptor RAD23c OS=Capsicum annuum OX=4072 GN=T459_14513	2	459.725	-0.83288	0.0061851	102.51	yes	0.938	1.053	1.012	0.955	1.083	0.96
210	AAFPDVSDVQPLVAICNDPR	A0A1U8E1S6	Uncharacterized protein OS=Capsicum annuum OX=4072 GN=T459_24300	3	728.697	-0.70464	4.4174e-09	74.618	yes	NA	NA	NA	NA	NA	NA
211	AAFPQGEVVAHLDNK	A0A1U8F9A2	D-aminoacyl-tRNA deacylase OS=Capsicum annuum OX=4072 GN=T459_17631	3	532.611	-0.82407	3.7343e-07	80.632	yes	NA	NA	NA	NA	NA	NA
212	AAFPQGEVVAHLDNK	A0A1U8F9A2	D-aminoacyl-tRNA deacylase OS=Capsicum annuum OX=4072 GN=T459_17631	4	399.71	0.47063	0.038369	22.857	yes	NA	NA	NA	NA	NA	NA
213	AAFQSMK	A0A1U8F2J9	Uncharacterized protein OS=Capsicum annuum OX=4072 GN=T459_32815	2	391.697	-0.89448	0.026174	81.191	yes	1.052	0.937	1.037	0.978	0.998	0.998
214	AAFSPDASVLDREEEELIAR	A0A1U8EDA7	Uncharacterized protein OS=Capsicum annuum OX=4072 GN=T459_03183	3	740.038	-5.1525	7.7041e-24	118.48	yes	0.821	0.768	0.718	1.167	1.231	1.295
215	AAGAEPLPDGR	A0A1U8E835	Uncharacterized protein OS=Capsicum annuum OX=4072 GN=T459_32204	2	527.27	-2.175	6.1431e-05	90.05	yes	0.986	0.879	0.987	1.023	1.066	1.059
216	AAGDVSDLVK	A0A1U8GUB0	FAD synthetase 2, chloroplastic OS=Capsicum annuum OX=4072 GN=T459_14163	2	487.761	-1.2183	6.3037e-05	99.283	yes	1.018	0.951	1.055	0.972	1.022	0.982
217	AAGEEAVTHELPEATIMR	A0A2G2YSV4	NADH dehydrogenase [ubiquinone] 1 alpha subcomplex subunit 9, mitochondrial OS=Capsicum annuum OX=4072 GN=T459_23607	3	647.651	-1.5781	9.2102e-06	64.454	yes	0.975	0.886	1.061	1.061	0.925	1.092
218	AAGEEAVTHELPEATIMR	A0A2G2YSV4	NADH dehydrogenase [ubiquinone] 1 alpha subcomplex subunit 9, mitochondrial OS=Capsicum annuum OX=4072 GN=T459_23607	3	647.651	-0.162	0.00023211	49.47	yes	0.856	0.944	0.864	1.019	1.188	1.129
219	AAGEEAVTHELPEATIMR	A0A2G2YSV4	NADH dehydrogenase [ubiquinone] 1 alpha subcomplex subunit 9, mitochondrial OS=Capsicum annuum OX=4072 GN=T459_23607	3	642.319	-0.27223	2.1696e-05	62.658	yes	NA	NA	NA	NA	NA	NA
220	AAGEEPLPEEDPSNPIFKPLPEPSR	A0A2G2ZT68	Eukaryotic translation initiation factor 3 subunit H OS=Capsicum annuum OX=4072 GN=T459_07268	3	906.12	-1.1305	3.7366e-06	52.898	yes	1.041	0.944	0.931	0.896	1.126	1.062
221	AAGEEPLPEEDPSNPIFKPLPEPSR	A0A2G2ZT68	Eukaryotic translation initiation factor 3 subunit H OS=Capsicum annuum OX=4072 GN=T459_07268	4	679.842	-1.4964	2.8721e-13	67.827	yes	0.978	0.954	1.01	0.939	0.997	1.122
222	AAGEVLALQK	A0A1U8GLX0	Glucose-6-phosphate isomerase OS=Capsicum annuum OX=4072 GN=T459_12781	3	333.866	-0.14612	0.00090138	73.233	yes	1.041	1.02	0.975	0.986	0.999	0.979
223	AAGEVLALQK	A0A1U8GLX0	Glucose-6-phosphate isomerase OS=Capsicum annuum OX=4072 GN=T459_12781	2	500.295	-2.1465	3.4213e-05	117.7	yes	NA	NA	NA	NA	NA	NA
224	AAGEVLALQK	A0A1U8GLX0	Glucose-6-phosphate isomerase OS=Capsicum annuum OX=4072 GN=T459_12781	3	333.866	-0.11499	0.025345	36.424	yes	NA	NA	NA	NA	NA	NA
225	AAGGYGAIR	A0A1U8FN33	L-ascorbate oxidase-like protein OS=Capsicum annuum OX=4072 GN=T459_05891	2	418.225	-0.60896	0.00085917	113.14	yes	1.119	1.02	1.043	0.952	0.999	0.866
226	AAGILENFEEGEK	A0A1U8FXI2	Uncharacterized protein OS=Capsicum annuum OX=4072 GN=T459_29891	2	703.844	-1.2305	4.0649e-33	176.89	yes	1.108	1.082	1.105	0.871	0.938	0.895
227	AAGISTVSVPAK	A0A1U8EIE7	Dihydrolipoamide acetyltransferase component of pyruvate dehydrogenase complex OS=Capsicum annuum OX=4072 GN=T459_26871	3	367.549	-0.42261	0.00059871	63.624	yes	0.895	0.992	0.96	0.915	1.135	1.103
228	AAGISTVSVPAK	A0A1U8EIE7	Dihydrolipoamide acetyltransferase component of pyruvate dehydrogenase complex OS=Capsicum annuum OX=4072 GN=T459_26871	2	550.819	-2.1316	0.00021011	87.568	yes	1.025	0.955	0.987	0.985	1.102	0.944
229	AAGLALK	A0A2G3ALX3	Uncharacterized protein (Fragment) OS=Capsicum annuum OX=4072 GN=T459_03119	3	215.143	1.0966	0.022675	50.12	yes	1.025	1.002	0.986	0.945	1.013	1.03
230	AAGLLEK	A0A2G2XZL3	Ran-binding protein 1-like protein b OS=Capsicum annuum OX=4072 GN=T459_33209	2	351.213	0.97507	0.016732	91.906	yes	NA	NA	NA	NA	NA	NA
231	AAGLPNMCGVNIPYQISPSTDCTK	A0A2G2ZAL7	Non-specific lipid-transfer protein OS=Capsicum annuum OX=4072 GN=T459_16967	4	649.307	-2.0911	2.1213e-13	72.316	yes	0.965	1.101	1.054	0.982	0.942	0.957
232	AAGLPNMCGVNIPYQISPSTDCTK	A0A2G2ZAL7	Non-specific lipid-transfer protein OS=Capsicum annuum OX=4072 GN=T459_16967	3	865.406	-1.9313	6.9357e-06	49.66	yes	1.189	0.939	1.162	0.931	0.95	0.83
233	AAGLSGVCGVK	A0A2G2YKI8	Non-specific lipid-transfer protein OS=Capsicum annuum OX=4072 GN=T459_25343	3	340.183	-0.63681	2.2371e-05	88.495	yes	0.874	1.076	0.915	0.952	1.009	1.174
234	AAGLSSVLESGTK	A0A2G2Y4P8	THO complex subunit 4D OS=Capsicum annuum OX=4072 GN=T459_29137	3	407.222	-1.9368	2.1632e-08	103.44	yes	1.055	0.989	1.033	0.993	0.928	1.003
235	AAGMAVVAVPSLAK	A0A1U8FL67	Bifunctional riboflavin kinase/FMN phosphatase OS=Capsicum annuum OX=4072 GN=T459_05812	3	434.248	-0.2539	0.00060454	55.261	yes	NA	NA	NA	NA	NA	NA
236	AAGMAVVAVPSLAK	A0A1U8FL67	Bifunctional riboflavin kinase/FMN phosphatase OS=Capsicum annuum OX=4072 GN=T459_05812	3	428.916	0.048152	0.0011201	53.448	yes	1.054	0.895	1.015	0.95	1.117	0.97
237	AAGMYGGLR	A0A2G2YQV3	Arginine biosynthesis bifunctional protein ArgJ, chloroplastic OS=Capsicum annuum OX=4072 GN=T459_22913	2	456.224	-0.5023	0.012956	53.754	yes	0.952	1.046	1.031	0.964	1.087	0.92
238	AAGQFTVTANMR	A0A1U8E5E7	ATP phosphoribosyltransferase 1, chloroplastic OS=Capsicum annuum OX=4072 GN=T459_32435	2	633.817	-2.1594	8.0333e-05	90.861	yes	NA	NA	NA	NA	NA	NA
239	AAGSYYYLDD	A0A1U8GLE7	ATP-binding cassette sub-family E member 1 OS=Capsicum annuum OX=4072 GN=T459_01073	2	569.24	-2.2083	0.017048	53.756	yes	NA	NA	NA	NA	NA	NA
240	AAGTGYWK	A0A2G2ZGJ3	NAC domain-containing protein 48 OS=Capsicum annuum OX=4072 GN=T459_14050	2	427.214	-1.2115	0.0068232	89.698	yes	NA	NA	NA	NA	NA	NA
241	AAGTSVEIVHYDPK	A0A1U8E4G4	Chloroplast stem-loop binding protein of 41 kDa a, chloroplastic OS=Capsicum annuum OX=4072 GN=T459_23325	3	496.256	-1.1656	4.7881e-05	77.644	yes	1.013	0.99	0.95	0.924	1.073	1.05
242	AAGTSVEIVHYDPK	A0A1U8E4G4	Chloroplast stem-loop binding protein of 41 kDa a, chloroplastic OS=Capsicum annuum OX=4072 GN=T459_23325	3	496.256	-1.0597	6.2386e-05	72.891	yes	1.046	0.942	0.964	0.997	1.051	1
243	AAGTSVEIVHYDPK	A0A1U8E4G4	Chloroplast stem-loop binding protein of 41 kDa a, chloroplastic OS=Capsicum annuum OX=4072 GN=T459_23325	4	372.444	-0.27095	0.0012649	46.069	yes	1.05	1.076	0.947	0.959	1.099	0.87
244	AAGTSVEIVHYDPK	A0A1U8E4G4	Chloroplast stem-loop binding protein of 41 kDa a, chloroplastic OS=Capsicum annuum OX=4072 GN=T459_23325	3	496.256		0.017841	29.355	yes	NA	NA	NA	NA	NA	NA
245	AAGVLAEEGGLAVK	A0A1U8E2J1	La protein 1 OS=Capsicum annuum OX=4072 GN=T459_21701	2	642.862	-1.5869	1.3547e-18	127.02	yes	0.963	0.874	0.873	1.088	1.1	1.102
246	AAGVPIVIAINK	A0A2G2Z4L1	Translation initiation factor IF-2 OS=Capsicum annuum OX=4072 GN=T459_20448	3	389.248		5.749e-26	105.2	yes	NA	NA	NA	NA	NA	NA
247	AAHALGLPEVSDFFAK	A0A1U8H4D5	Delta-1-pyrroline-5-carboxylate dehydrogenase 12A1, mitochondrial OS=Capsicum annuum OX=4072 GN=T459_17725	4	418.973	0.63348	0.0029707	36.292	yes	NA	NA	NA	NA	NA	NA
248	AAHFEESMK	A0A1U8G4N4	Cell division cycle protein 48-like protein OS=Capsicum annuum OX=4072 GN=T459_33423	3	350.496	0.26533	0.0048225	57.59	yes	1.115	1.058	0.943	0.89	1.07	0.924
249	AAHLALR	A0A1U8FC73	Thiamine thiazole synthase, chloroplastic OS=Capsicum annuum OX=4072 GN=THI1	2	376.232	-0.023479	0.048765	63.642	yes	1.413	1.418	1.3	0.598	0.721	0.551
250	AAHLVDSTNQVGHFQK	A0A1U8E8S2	Plasma membrane ATPase OS=Capsicum annuum OX=4072 GN=T459_24500	4	438.972	-0.83111	0.00011279	56.569	yes	NA	NA	NA	NA	NA	NA
251	AAHPEWSPSAIR	A0A1U8FIT0	Uncharacterized protein OS=Capsicum annuum OX=4072 GN=T459_02595	3	441.226	-0.93075	0.0011021	57.175	yes	0.92	0.947	0.985	1.091	0.993	1.064
252	AAHVFSEAK	A0A2G3AJ57	Galactokinase OS=Capsicum annuum OX=4072 GN=T459_02159	2	480.251	-2.6556	0.046218	47.603	yes	NA	NA	NA	NA	NA	NA
253	AAHVFSEAK	A0A2G3AJ57	Galactokinase OS=Capsicum annuum OX=4072 GN=T459_02159	3	320.503	-0.27115	0.0031565	68.224	yes	1.01	1.069	0.952	1.028	1.025	0.914
254	AAHVLAAANTAAEVALR	A0A2G2Z9C6	Proliferation-associated protein 2G4 OS=Capsicum annuum OX=4072 GN=T459_16553	3	550.309	-0.59378	5.8809e-18	110.84	yes	0.916	1.026	1.005	0.842	0.949	1.261
255	AAIEEAAEK	A0A2G3AKK4	Omega-amidase NIT2 (Fragment) OS=Capsicum annuum OX=4072 GN=T459_02651	2	466.24	-2.9319	0.00099029	115.78	yes	1.003	0.957	1.055	0.999	1.036	0.95
256	AAIEEAAEK	A0A2G3AKK4	Omega-amidase NIT2 (Fragment) OS=Capsicum annuum OX=4072 GN=T459_02651	3	311.163	-1.1685	0.02633	39.305	yes	NA	NA	NA	NA	NA	NA
257	AAIEGGATIIQLR	A0A2G2Y1U3	Thiamine biosynthetic bifunctional enzyme TH1, chloroplastic OS=Capsicum annuum OX=4072 GN=T459_32409	2	656.883	-1.0766	5.0743e-12	112.95	yes	0.971	0.937	0.944	1.076	1.046	1.026
258	AAIFISEDPGVFR	A0A1U8FIT0	Uncharacterized protein OS=Capsicum annuum OX=4072 GN=T459_02595	2	711.375	-0.1189	0.0016345	65.179	yes	0.963	1.032	0.988	0.997	1.091	0.929
259	AAIFISEDPGVFR	A0A1U8FIT0	Uncharacterized protein OS=Capsicum annuum OX=4072 GN=T459_02595	3	474.586	0.97598	0.00045734	64.64	yes	0.943	0.885	1.094	0.832	1.352	0.895
260	AAIGGPFNLIDHNGK	A0A1U8EGC7	Protein SCO1-like protein 1, mitochondrial OS=Capsicum annuum OX=4072 GN=T459_22354	3	508.932	-0.70411	0.00093636	51.726	yes	NA	NA	NA	NA	NA	NA
261	AAIGQSEPIPILVEVIR	A0A1U8EX65	RING-type E3 ubiquitin transferase OS=Capsicum annuum OX=4072 GN=T459_33308	3	602.356	-0.67886	0.0046864	36.127	yes	NA	NA	NA	NA	NA	NA
262	AAIKEESEGK	A0A1U8F1D8	Glyceraldehyde-3-phosphate dehydrogenase OS=Capsicum annuum OX=4072 GN=T459_27945	3	354.521	0.2688	1.1392e-05	110.39	yes	0.749	0.704	0.779	1.219	1.314	1.233
263	AAINTEAR	A0A1U8EHG4	Uncharacterized protein OS=Capsicum annuum OX=4072 GN=T459_11705	2	423.227	-1.0067	0.0069334	99.136	yes	NA	NA	NA	NA	NA	NA
264	AAIPTIK	A0A2G2Z688	Phosphoglycerate kinase OS=Capsicum annuum OX=4072 GN=T459_21042	3	238.49	2.2389	0.0042197	94.163	yes	1.042	0.992	1.011	0.989	1.052	0.913
265	AAIPTIK	A0A2G2Z688	Phosphoglycerate kinase OS=Capsicum annuum OX=4072 GN=T459_21042	2	357.231	1.1543	0.033299	75.109	yes	1.041	0.952	1	1.008	0.953	1.045
266	AAIQCLK	A0A2G2YI53	Vacuolar protein sorting-associated protein 32-like protein 1 OS=Capsicum annuum OX=4072 GN=T459_28892	2	402.226	-1.0554	0.017226	97.071	yes	0.978	0.915	0.891	1.011	1.156	1.048
267	AAIQETVSATLNR	A0A2G3A4M3	Photosystem II stability/assembly factor, chloroplastic OS=Capsicum annuum OX=4072 GN=T459_04298	2	687.373	-1.104	0.0034424	60.364	yes	1.043	0.939	0.965	0.992	1.02	1.042
268	AAIQETVSATLNR	A0A2G3A4M3	Photosystem II stability/assembly factor, chloroplastic OS=Capsicum annuum OX=4072 GN=T459_04298	3	458.584	-0.10027	2.8037e-08	101.53	yes	1.031	1.072	0.901	1.09	0.986	0.921
269	AAIQTAEEYLVSQNRPR	A0A2G2ZF64	Villin-2 OS=Capsicum annuum OX=4072 GN=T459_13668	3	649.341	0.46871	3.0297e-14	106.33	yes	0.942	0.928	0.98	1.095	1.036	1.019
270	AAISTVDVLTPK	A0A2G2Z0I3	Pyrophosphate-energized vacuolar membrane proton pump OS=Capsicum annuum OX=4072 GN=T459_19030	3	405.571	-1.7016	4.1617e-08	100.69	yes	0.967	0.962	1.002	1.022	1.007	1.04
271	AAISTVDVLTPK	A0A2G2Z0I3	Pyrophosphate-energized vacuolar membrane proton pump OS=Capsicum annuum OX=4072 GN=T459_19030	2	607.853	-3.4389	5.9641e-12	113.61	yes	1.021	1.03	0.942	0.969	1.016	1.022
272	AAIVNSQTLEEVAR	A0A2G3A2T7	U2 small nuclear ribonucleoprotein A (Fragment) OS=Capsicum annuum OX=4072 GN=T459_10642	3	500.939	-0.59251	3.6093e-05	80.905	yes	0.998	0.878	0.967	0.97	1.138	1.049
273	AAKPPPIGPK	A0A2G2ZEM6	Photosystem I reaction center subunit IV, chloroplastic OS=Capsicum annuum OX=4072 GN=T459_18456	2	488.303		6.5283e-09	91.265	yes	NA	NA	NA	NA	NA	NA
274	AAKPPPIGPK	A0A2G2ZEM6	Photosystem I reaction center subunit IV, chloroplastic OS=Capsicum annuum OX=4072 GN=T459_18456	3	325.871		0.0087606	57.55	yes	NA	NA	NA	NA	NA	NA
275	AAKPPPIGPK	A0A2G2ZEM6	Photosystem I reaction center subunit IV, chloroplastic OS=Capsicum annuum OX=4072 GN=T459_18456	3	325.871		0.019114	51.445	yes	NA	NA	NA	NA	NA	NA
276	AAKPPPIGPK	A0A2G2ZEM6	Photosystem I reaction center subunit IV, chloroplastic OS=Capsicum annuum OX=4072 GN=T459_18456	3	325.871		0.044096	46.001	yes	NA	NA	NA	NA	NA	NA
277	AAKPPPIGPK	A0A2G2ZEM6	Photosystem I reaction center subunit IV, chloroplastic OS=Capsicum annuum OX=4072 GN=T459_18456	3	325.871		1.8559e-05	77.662	yes	NA	NA	NA	NA	NA	NA
278	AAKPPPIGPK	A0A2G2ZEM6	Photosystem I reaction center subunit IV, chloroplastic OS=Capsicum annuum OX=4072 GN=T459_18456	3	325.871		0.00030826	71.614	yes	NA	NA	NA	NA	NA	NA
279	AAKPPPIGPK	A0A2G2ZEM6	Photosystem I reaction center subunit IV, chloroplastic OS=Capsicum annuum OX=4072 GN=T459_18456	3	325.871		0.049318	44.863	yes	NA	NA	NA	NA	NA	NA
280	AALECCHK	A0A1U8E3G8	S-(hydroxymethyl)glutathione dehydrogenase OS=Capsicum annuum OX=4072 GN=T459_23668	3	330.149	0.47468	0.0098572	57.281	yes	NA	NA	NA	NA	NA	NA
281	AALEDMCK	A0A1U8F7V0	HD domain-containing protein 2 OS=Capsicum annuum OX=4072 GN=T459_33449	2	477.207	-2.1445	0.044839	44.395	yes	1.056	0.998	0.921	1.015	1.034	0.977
282	AALEMLK	A0A1U8EV97	Carboxypeptidase OS=Capsicum annuum OX=4072 GN=T459_29444	2	396.22	-1.4836	0.031995	54.525	yes	NA	NA	NA	NA	NA	NA
283	AALEMLQR	A0A1U8EWA6	Carboxypeptidase OS=Capsicum annuum OX=4072 GN=T459_28685	2	466.255	0.14135	0.044223	56.014	no	0.971	1.054	0.984	1.008	0.964	1.018
284	AALEPNAFQQK	A0A2G2YY02	Beta-adaptin-like protein OS=Capsicum annuum OX=4072 GN=T459_21914	2	608.82	-0.91846	1.4136e-08	128.01	yes	1.006	0.986	0.898	1.021	1.007	1.083
285	AALETGASLAPGESR	A0A2G2ZZK2	Protein SGT1-like protein A OS=Capsicum annuum OX=4072 GN=T459_09496	2	715.368	-1.5077	8.3784e-34	159.22	yes	0.947	0.858	0.875	1.046	1.11	1.164
286	AALETGASLAPGESR	A0A2G2ZZK2	Protein SGT1-like protein A OS=Capsicum annuum OX=4072 GN=T459_09496	3	477.248	-0.25599	2.384e-20	123.1	yes	0.912	0.859	0.896	0.994	1.197	1.141
287	AALGVHEAAYEVK	A0A1U8EUB1	Asparagine synthetase [glutamine-hydrolyzing] 2 OS=Capsicum annuum OX=4072 GN=T459_30355	3	453.242	-1.1959	1.7323e-06	98.105	yes	1.124	0.928	1.05	0.91	1.009	0.978
288	AALGVHEAAYEVK	A0A1U8EUB1	Asparagine synthetase [glutamine-hydrolyzing] 2 OS=Capsicum annuum OX=4072 GN=T459_30355	2	679.359	-2.4105	7.6027e-08	104.24	yes	NA	NA	NA	NA	NA	NA
289	AALLDIGIER	A0A2G3AHD3	UPF0061 protein OS=Capsicum annuum OX=4072 GN=T459_01538	2	535.814	-1.656	8.3643e-09	150.15	yes	NA	NA	NA	NA	NA	NA
290	AALNDFDR	A0A1U8FD63	Uncharacterized protein OS=Capsicum annuum OX=4072 GN=T459_08791	2	461.225	-0.25107	0.03681	59.35	yes	1.097	1.015	0.912	0.89	1.118	0.968
291	AALPAPR	A0A1U8F1N7	Peroxisomal (S)-2-hydroxy-acid oxidase GLO1 OS=Capsicum annuum OX=4072 GN=T459_20462	2	348.214	-0.15503	0.016922	93.885	yes	NA	NA	NA	NA	NA	NA
292	AALPLLSDEQIHEMMK	A0A1U8G4F5	Cyanate hydratase OS=Capsicum annuum OX=4072 GN=CYN	3	614.643	-1.5643	8.996e-10	98.943	yes	0.977	0.96	0.92	1.082	1.014	1.048
293	AALPLLSDEQIHEMMK	A0A1U8G4F5	Cyanate hydratase OS=Capsicum annuum OX=4072 GN=CYN	3	614.643	-2.7643	5.4674e-15	110.97	yes	0.98	0.95	0.94	1.028	1.072	1.03
294	AALPQPR	A0A2G2YIR9	Peroxisomal (S)-2-hydroxy-acid oxidase GLO1 OS=Capsicum annuum OX=4072 GN=T459_24757	2	376.724	0.52606	0.047106	64.547	yes	1.009	0.998	0.995	0.924	1.097	0.977
295	AALPSSTIMIK	A0A2G3AF35	ATP-dependent Clp protease proteolytic subunit OS=Capsicum annuum OX=4072 GN=T459_00729	3	383.218	0.09218	9.3585e-05	80.688	yes	0.958	1.129	0.989	0.98	0.943	1.002
296	AALPSSTIMIK	A0A2G3AF35	ATP-dependent Clp protease proteolytic subunit OS=Capsicum annuum OX=4072 GN=T459_00729	3	377.886	0.057508	1.5132e-05	90.15	yes	1.092	0.987	1.026	0.91	1.079	0.905
297	AALPSSTIMIK	A0A2G3AF35	ATP-dependent Clp protease proteolytic subunit OS=Capsicum annuum OX=4072 GN=T459_00729	2	566.326	-1.9357	0.0027493	66.056	yes	1.013	0.948	0.992	0.997	1.081	0.969
298	AALPTLAR	A0A2G2Z6I1	Importin subunit alpha OS=Capsicum annuum OX=4072 GN=T459_15660	2	406.753	-0.46001	0.034913	60.76	yes	1.047	1.017	0.88	0.917	1.042	1.096
299	AALPVGTVSGAPK	A0A1U8FU77	Anthranilate synthase alpha subunit 1, chloroplastic OS=Capsicum annuum OX=4072 GN=T459_34727	2	584.34	-2.2937	5.7076e-08	105.65	yes	1.051	0.992	1.048	0.93	1.061	0.919
300	AALQEITQLVEAR	A0A2G2ZMK9	Putative serine protease EDA2 OS=Capsicum annuum OX=4072 GN=T459_11587	3	481.272	0.32793	9.4415e-18	150.69	yes	0.942	0.81	0.888	1.058	1.162	1.139
301	AALQEITQLVEAR	A0A2G2ZMK9	Putative serine protease EDA2 OS=Capsicum annuum OX=4072 GN=T459_11587	2	721.404	-1.1132	3.3716e-14	132.08	yes	0.946	0.969	0.945	1.003	1.082	1.054
302	AALSDEYFVK	A0A2G2YTL0	Citrate synthase OS=Capsicum annuum OX=4072 GN=T459_23883	2	571.79	-1.9251	2.7891e-12	156.48	yes	0.95	0.893	0.929	1.036	1.158	1.033
303	AALSDEYFVK	A0A2G2YTL0	Citrate synthase OS=Capsicum annuum OX=4072 GN=T459_23883	3	381.529	-0.30032	0.0089576	46.001	yes	1.114	0.824	0.789	0.975	1.197	1.101
304	AALSYEK	A0A2G3AM22	Uncharacterized protein OS=Capsicum annuum OX=4072 GN=T459_03169	2	391.208	-0.98208	0.054047	60.76	yes	NA	NA	NA	NA	NA	NA
305	AALTVEPR	A0A1U8EQ77	Single-stranded DNA-binding protein WHY1, chloroplastic OS=Capsicum annuum OX=4072 GN=T459_27395	2	428.748	-0.73494	0.0092825	85.212	yes	NA	NA	NA	NA	NA	NA
306	AALTVEPR	A0A1U8EQ77	Single-stranded DNA-binding protein WHY1, chloroplastic OS=Capsicum annuum OX=4072 GN=T459_27395	2	428.748	-1.1053	0.017373	75.213	yes	1.037	1.034	1.014	0.927	1.013	0.976
307	AALVADEIAK	A0A2G3AL55	Pyruvate, phosphate dikinase, chloroplastic OS=Capsicum annuum OX=4072 GN=T459_02858	3	334.194	0.56474	0.0015232	66.692	yes	1.03	0.861	1.054	0.963	1.141	0.951
308	AALVADEIAK	A0A2G3AL55	Pyruvate, phosphate dikinase, chloroplastic OS=Capsicum annuum OX=4072 GN=T459_02858	2	500.787	-0.83528	4.656e-05	104.22	yes	0.936	0.887	0.951	0.975	1.194	1.057
309	AALVEFYAPWCGHCK	A0A1U8DUR9	Uncharacterized protein OS=Capsicum annuum OX=4072 GN=T459_33662	4	452.962	0.52823	5.3364e-06	69.352	yes	NA	NA	NA	NA	NA	NA
310	AALVEFYAPWCGHCK	A0A1U8DUR9	Uncharacterized protein OS=Capsicum annuum OX=4072 GN=T459_33662	3	603.613	-0.54416	2.4646e-10	101.53	yes	0.931	0.911	0.922	1.069	1.075	1.091
311	AAMEAFGTYVEPIAGDAR	A0A2G2Y950	Uncharacterized protein OS=Capsicum annuum OX=4072 GN=T459_30710	3	628.965	-0.93992	0.00026529	48.201	yes	NA	NA	NA	NA	NA	NA
312	AAMEDGVLTVTVPK	A0A1U8DWR1	18.5 kDa class I heat shock protein OS=Capsicum annuum OX=4072 GN=T459_32220	2	715.882	-3.4455	9.0886e-39	180.09	no	0.09	0.118	0.136	1.894	1.962	1.8
313	AAMEDGVLTVTVPK	A0A1U8DWR1	18.5 kDa class I heat shock protein OS=Capsicum annuum OX=4072 GN=T459_32220	2	715.882	-1.2206	1.2201e-26	161.21	no	0.175	0.211	0.176	1.75	1.906	1.783
314	AAMEDGVLTVTVPK	A0A1U8DWR1	18.5 kDa class I heat shock protein OS=Capsicum annuum OX=4072 GN=T459_32220	3	477.59	-0.30605	5.1723e-06	90.793	no	0.298	0.225	0.157	1.621	2.078	1.62
315	AAMEDGVLTVTVPK	A0A1U8DWR1	18.5 kDa class I heat shock protein OS=Capsicum annuum OX=4072 GN=T459_32220	2	723.879	-1.6878	1.7406e-05	87.914	no	0.188	0.141	0.159	1.782	1.997	1.733
316	AAMEDGVLTVTVPKEEQK	A0A1U8DWR1	18.5 kDa class I heat shock protein OS=Capsicum annuum OX=4072 GN=T459_32220	4	487.004	-0.67601	7.232e-13	97.235	yes	NA	NA	NA	NA	NA	NA
317	AAMENGVLTVTVPK	A0A1U8E820	18.5 kDa class I heat shock protein OS=Capsicum annuum OX=4072 GN=T459_32217	3	477.262	-0.11818	0.0012806	51.939	yes	NA	NA	NA	NA	NA	NA
318	AAMENGVLTVTVPKEEEKR	A0A1U8E820	18.5 kDa class I heat shock protein OS=Capsicum annuum OX=4072 GN=T459_32217	4	526.275	-1.5034	6.1247e-06	61.477	yes	0.357	0.401	0.384	1.585	1.761	1.513
319	AAMGTENIDDIK	A0A1U8E7S7	Heat shock 70 kDa protein, mitochondrial OS=Capsicum annuum OX=4072 GN=T459_31907	2	639.306	-2.4568	0.0005945	83.204	yes	0.985	1.007	0.968	1.009	1.009	1.022
320	AAMGTENVDEIK	A0A2G2Y3C6	Heat shock 70 kDa protein, mitochondrial OS=Capsicum annuum OX=4072 GN=T459_31904	2	647.303	-0.86156	0.017947	41.242	yes	0.838	0.876	0.876	1.185	1.195	1.031
321	AAMGTENVDEIK	A0A2G2Y3C6	Heat shock 70 kDa protein, mitochondrial OS=Capsicum annuum OX=4072 GN=T459_31904	2	639.306	-1.7115	3.7881e-25	166.62	yes	1.001	0.909	0.921	0.978	1.123	1.067
322	AAMGTENVDEIK	A0A2G2Y3C6	Heat shock 70 kDa protein, mitochondrial OS=Capsicum annuum OX=4072 GN=T459_31904	3	426.54	-0.84269	0.0027305	51.286	yes	NA	NA	NA	NA	NA	NA
323	AANAHEFIISMPQGYDTLVGER	A0A2G2ZYY1	ABC transporter B family member 28 OS=Capsicum annuum OX=4072 GN=T459_09282	3	812.394	-1.4327	5.4964e-06	55.844	yes	0.906	1.011	0.887	1.032	1.123	1.042
324	AANAPYVLHYTSYDSK	A0A2G3A2E4	Geranylgeranyl diphosphate reductase, chloroplastic OS=Capsicum annuum OX=4072 GN=T459_10457	3	600.625	0.6175	1.0286e-10	101.53	yes	0.997	1.04	0.954	1.005	0.875	1.13
325	AANAQAALAYK	A0A1U8F4J3	Transaldolase 2 OS=Capsicum annuum OX=4072 GN=T459_14083	3	364.533	0.57826	0.0018332	56.404	yes	NA	NA	NA	NA	NA	NA
326	AANAQAALAYK	A0A1U8F4J3	Transaldolase 2 OS=Capsicum annuum OX=4072 GN=T459_14083	2	546.296	-2.0406	1.1395e-20	164.64	yes	NA	NA	NA	NA	NA	NA
327	AANGVVIATEK	A0A2G2YJ28	Proteasome subunit alpha type OS=Capsicum annuum OX=4072 GN=T459_24834	3	358.533	-1.1406	0.00064694	69.721	yes	0.913	0.933	1.026	1.004	1.064	1.061
328	AANIKPDPDIDIYMK	A0A2G2ZTV6	Pleiotropic drug resistance protein 1 OS=Capsicum annuum OX=4072 GN=T459_07508	3	573.959	-2.6063	0.00020435	65.374	no	NA	NA	NA	NA	NA	NA
329	AANIKPDPDIDIYMK	A0A2G2ZTV6	Pleiotropic drug resistance protein 1 OS=Capsicum annuum OX=4072 GN=T459_07508	4	426.722	-0.50367	2.6427e-05	66.246	no	0.911	0.963	0.881	1.063	1.136	1.046
330	AANIKPDPDIDIYMK	A0A2G2ZTV6	Pleiotropic drug resistance protein 1 OS=Capsicum annuum OX=4072 GN=T459_07508	3	568.627	-1.9321	5.84e-06	74.789	no	0.906	0.879	0.987	1.017	1.145	1.066
331	AANPAEAAR	A0A1U8EL35	Uridine 5'-monophosphate synthase OS=Capsicum annuum OX=4072 GN=T459_28572	2	435.725		0.00027007	77.14	yes	NA	NA	NA	NA	NA	NA
332	AAPEGSFILLHGCAHNPTGIDPTPEQWEK	A0A1U8DRU2	Aspartate aminotransferase OS=Capsicum annuum OX=4072 GN=T459_21468	4	793.884	-1.0272	4.7042e-11	57.21	yes	1.071	0.821	1.025	0.968	1.203	0.912
333	AAPETCAEFLGSFVAEK	A0A2G2YLR4	Serine/threonine-protein kinase STN8, chloroplastic OS=Capsicum annuum OX=4072 GN=T459_25797	3	609.626	-1.0655	6.9664e-12	92.773	yes	1.041	0.899	0.982	0.993	1.039	1.046
334	AAPLLAMTDFVLHR	A0A2G3AAD3	Geranylgeranyl pyrophosphate synthase, chloroplastic OS=Capsicum annuum OX=4072 GN=T459_06287	3	518.954	0.60269	5.1723e-06	90.793	yes	1.124	1.133	0.863	0.863	0.822	1.195
335	AAPLLDIMGK	A0A2G2ZVV1	Glyoxylate/succinic semialdehyde reductase 2, chloroplastic OS=Capsicum annuum OX=4072 GN=T459_08209	3	348.863	-0.15781	0.0047601	47.603	yes	1.088	1.159	1.014	0.833	0.955	0.951
336	AAPLLDIMGK	A0A2G2ZVV1	Glyoxylate/succinic semialdehyde reductase 2, chloroplastic OS=Capsicum annuum OX=4072 GN=T459_08209	2	522.792	-2.6784	0.00045699	83.948	yes	0.982	0.979	1.021	0.998	1.069	0.951
337	AAPLLDIMGK	A0A2G2ZVV1	Glyoxylate/succinic semialdehyde reductase 2, chloroplastic OS=Capsicum annuum OX=4072 GN=T459_08209	2	514.794	-0.8877	1.6681e-08	148.32	yes	1.087	0.922	0.946	0.976	1.073	0.996
338	AAPLLDIMGK	A0A2G2ZVV1	Glyoxylate/succinic semialdehyde reductase 2, chloroplastic OS=Capsicum annuum OX=4072 GN=T459_08209	3	343.532	0.4432	0.00090138	73.233	yes	1.066	0.965	1.068	0.974	1.057	0.871
339	AAPLLDIMGK	A0A2G2ZVV1	Glyoxylate/succinic semialdehyde reductase 2, chloroplastic OS=Capsicum annuum OX=4072 GN=T459_08209	2	514.794	-1.5248	4.1495e-05	105.98	yes	0.997	1.011	0.918	1.013	1.007	1.054
340	AAPLLDIMGK	A0A2G2ZVV1	Glyoxylate/succinic semialdehyde reductase 2, chloroplastic OS=Capsicum annuum OX=4072 GN=T459_08209	3	343.532	0.50067	0.046844	32.415	yes	0.974	0.958	0.875	1.125	0.978	1.089
341	AAPMMEEISLLK	A0A2G2YSH0	Uncharacterized protein OS=Capsicum annuum OX=4072 GN=T459_23477	3	444.902	0.23283	0.00082894	60.598	yes	NA	NA	NA	NA	NA	NA
342	AAPSQVSDMNHAPVNNK	A0A2G2ZA14	Uncharacterized protein OS=Capsicum annuum OX=4072 GN=T459_16899	3	593.953	-2.3348	0.00044181	52.112	yes	NA	NA	NA	NA	NA	NA
343	AAPVNTLNPQR	A0A2G2YCE3	Protein root UVB sensitive 2, chloroplastic OS=Capsicum annuum OX=4072 GN=T459_26910	2	590.825	-2.1996	0.012091	53.237	yes	0.921	1.024	1.044	1.037	1.007	0.967
344	AAQDALLTR	A0A2G3AH23	Fructose-bisphosphate aldolase OS=Capsicum annuum OX=4072 GN=T459_01409	2	479.769	-0.83621	0.0055229	77.744	yes	1.03	1.004	0.881	0.925	1.041	1.119
345	AAQDALLTR	A0A2G3AH23	Fructose-bisphosphate aldolase OS=Capsicum annuum OX=4072 GN=T459_01409	3	320.182	-0.010054	0.00019539	108.43	yes	0.959	0.998	0.854	0.925	1.324	0.94
346	AAQDALLVR	A0A2G3AA97	Fructose-bisphosphate aldolase OS=Capsicum annuum OX=4072 GN=T459_06243	2	478.78	-1.3022	0.016893	61.56	yes	0.903	0.935	0.855	1.04	1.237	1.03
347	AAQDALLVR	A0A2G3AA97	Fructose-bisphosphate aldolase OS=Capsicum annuum OX=4072 GN=T459_06243	3	319.522	-0.65461	0.00045177	88.819	yes	0.978	0.869	1.031	0.995	1.09	1.036
348	AAQDALLVR	A0A2G3AA97	Fructose-bisphosphate aldolase OS=Capsicum annuum OX=4072 GN=T459_06243	2	478.78	-0.91841	0.015728	63.426	yes	0.962	0.969	0.959	0.958	1.057	1.096
349	AAQDALLVR	A0A2G3AA97	Fructose-bisphosphate aldolase OS=Capsicum annuum OX=4072 GN=T459_06243	3	319.522	-0.27643	0.0012993	78.149	yes	NA	NA	NA	NA	NA	NA
350	AAQDIALAELAPTHPIR	A0A1U8EW42	14-3-3 protein 10 OS=Capsicum annuum OX=4072 GN=T459_29344	3	596.332	-1.1261	2.6222e-08	77.506	yes	0.866	0.824	0.813	0.832	1.37	1.296
351	AAQDIALAELAPTHPIR	A0A1U8EW42	14-3-3 protein 10 OS=Capsicum annuum OX=4072 GN=T459_29344	4	447.501	0.058361	0.0086979	33.36	yes	NA	NA	NA	NA	NA	NA
352	AAQDIANAELAPTHPIR	A0A2G2Y8S1	14-3-3 protein 2 OS=Capsicum annuum OX=4072 GN=T459_30557	3	596.979	-1.1104	4.6689e-07	68.261	yes	NA	NA	NA	NA	NA	NA
353	AAQDIANAELAPTHPIR	A0A2G2Y8S1	14-3-3 protein 2 OS=Capsicum annuum OX=4072 GN=T459_30557	3	596.651	-1.9889	1.3153e-10	82.877	yes	0.949	0.92	0.848	1.197	1.05	1.036
354	AAQDIANAELAPTHPIR	A0A2G2Y8S1	14-3-3 protein 2 OS=Capsicum annuum OX=4072 GN=T459_30557	4	447.74	-0.85179	0.019933	28.166	yes	1.065	1.002	0.88	0.779	1.135	1.139
355	AAQDIANAELAPTHPIR	A0A2G2Y8S1	14-3-3 protein 2 OS=Capsicum annuum OX=4072 GN=T459_30557	2	894.474	-1.976	8.1174e-10	79.393	yes	0.992	0.914	0.998	0.979	1.121	0.996
356	AAQDIASAELAPTHPIR	A0A1U8GCY2	14-3-3-like protein OS=Capsicum annuum OX=4072 GN=T459_12702	3	587.648	-1.1776	4.4359e-14	102.08	yes	1	0.927	0.904	1.108	0.967	1.094
357	AAQDIASAELAPTHPIR	A0A1U8GCY2	14-3-3-like protein OS=Capsicum annuum OX=4072 GN=T459_12702	4	440.988	-0.10697	0.0013576	42.314	yes	0.998	0.925	1.009	1.021	1.03	1.017
358	AAQDIASAELAPTHPIR	A0A1U8GCY2	14-3-3-like protein OS=Capsicum annuum OX=4072 GN=T459_12702	2	880.968	-1.1161	0.0056609	44.998	yes	0.94	0.951	0.929	1.044	1.227	0.908
359	AAQEFLDEHNK	A0A1U8FJN9	STS14 protein OS=Capsicum annuum OX=4072 GN=T459_04687	3	434.542	-0.85955	9.1453e-06	93.839	yes	NA	NA	NA	NA	NA	NA
360	AAQEFLDEHNK	A0A1U8FJN9	STS14 protein OS=Capsicum annuum OX=4072 GN=T459_04687	4	326.158	0.090165	0.00059425	62.466	yes	1.044	0.993	0.888	0.947	1.149	0.979
361	AAQEFLDEHNK	A0A1U8FJN9	STS14 protein OS=Capsicum annuum OX=4072 GN=T459_04687	2	651.31	-1.9732	0.0018228	69.864	yes	1.196	1.112	0.996	0.971	0.852	0.874
362	AAQEIALTDLPPTHPIR	A0A2G2ZQP9	14-3-3 protein 10 OS=Capsicum annuum OX=4072 GN=T459_12753	3	615.007	-1.3528	3.0031e-07	69.188	yes	0.833	0.922	0.948	0.995	1.054	1.248
363	AAQEIALTDLPPTHPIR	A0A2G2ZQP9	14-3-3 protein 10 OS=Capsicum annuum OX=4072 GN=T459_12753	3	615.007	-0.45329	8.1199e-11	85.362	yes	1.144	0.968	1.012	0.895	0.991	0.989
364	AAQFDLVK	A0A2G2XW69	Uncharacterized protein OS=Capsicum annuum OX=4072 GN=T459_34416	2	446.25	-1.801	0.006391	101.65	yes	1.091	0.976	1.063	0.932	0.994	0.944
365	AAQGMPMSVAPAR	A0A2G3AMG9	T-complex protein 1 subunit alpha OS=Capsicum annuum OX=4072 GN=T459_03291	3	440.213	-0.26861	0.00039929	62.088	yes	0.796	0.949	0.97	1.028	1.187	1.07
366	AAQGMPMSVAPAR	A0A2G3AMG9	T-complex protein 1 subunit alpha OS=Capsicum annuum OX=4072 GN=T459_03291	3	434.881	-0.24542	0.004798	40.287	yes	NA	NA	NA	NA	NA	NA
367	AAQGMPMSVAPAR	A0A2G3AMG9	T-complex protein 1 subunit alpha OS=Capsicum annuum OX=4072 GN=T459_03291	2	643.821	-2.9073	2.9137e-12	116.19	yes	0.955	1.064	0.915	1.017	1.112	0.936
368	AAQIFSDPK	B5LAU9	Glutamine synthetase OS=Capsicum annuum OX=4072 GN=T459_02814	2	488.759	-2.1867	0.0016431	92.538	yes	1.021	0.959	0.918	1.015	1.023	1.064
369	AAQIFSDPK	B5LAU9	Glutamine synthetase OS=Capsicum annuum OX=4072 GN=T459_02814	2	488.759		0.017468	52.49	yes	NA	NA	NA	NA	NA	NA
370	AAQLDVVVTNK	Q6RW44	60S ribosomal protein L32 OS=Capsicum annuum OX=4072 GN=T459_05141	2	579.33	-1.5302	6.6319e-05	89.301	yes	1.043	0.946	1.031	1	1.003	0.977
371	AAQLGLK	A0A1U8GZI9	Dihydrolipoyl dehydrogenase OS=Capsicum annuum OX=4072 GN=T459_15259	3	234.15	-0.0020804	0.0049616	86.086	yes	1.142	0.968	0.92	0.979	1.063	0.929
372	AAQLGLK	A0A1U8GZI9	Dihydrolipoyl dehydrogenase OS=Capsicum annuum OX=4072 GN=T459_15259	2	350.721		0.0024714	84.244	yes	NA	NA	NA	NA	NA	NA
373	AAQLWVEEKPNYNYDSNR	A0A2G2YQL4	Pathogenesis-related protein 1 OS=Capsicum annuum OX=4072 GN=T459_22750	3	733.015	-1.2803	8.378e-49	164.02	yes	1.23	1.156	1.116	0.807	0.946	0.745
374	AAQNLIAK	A0A2G2ZPX2	Dynamin-related protein 4C OS=Capsicum annuum OX=4072 GN=T459_12489	2	414.751		0.032609	54.157	yes	NA	NA	NA	NA	NA	NA
375	AAQQASEDWYR	A0A1U8F657	Membrane-associated protein VIPP1, chloroplastic OS=Capsicum annuum OX=4072 GN=T459_29392	2	662.799	-2.4258	4.8974e-05	91.961	yes	0.999	1.05	0.977	0.984	1.109	0.881
376	AAQQASEDWYR	A0A1U8F657	Membrane-associated protein VIPP1, chloroplastic OS=Capsicum annuum OX=4072 GN=T459_29392	2	662.799	-2.2435	0.00023829	86.114	yes	1.072	0.929	0.991	0.962	1.048	0.998
377	AAQVLSQTDPPIFLAK	A0A1U8GVQ2	Protein disulfide-isomerase OS=Capsicum annuum OX=4072 GN=T459_16875	3	566.986	-1.372	1.3798e-09	98.943	yes	0.984	0.886	1.072	0.971	1.084	1.003
378	AAQVLSQTDPPIFLAK	A0A1U8GVQ2	Protein disulfide-isomerase OS=Capsicum annuum OX=4072 GN=T459_16875	2	849.975	-1.3302	2.7486e-39	168.41	yes	1.054	0.974	0.973	0.916	1.093	0.99
379	AAQYGQITEK	A0A2G3A7G5	Uncharacterized protein (Fragment) OS=Capsicum annuum OX=4072 GN=T459_05299	2	554.785	-2.6126	0.0099763	57.532	yes	1.004	1.036	1.177	0.956	0.939	0.886
380	AAQYGQITEK	A0A2G3A7G5	Uncharacterized protein (Fragment) OS=Capsicum annuum OX=4072 GN=T459_05299	3	370.193	-0.94713	0.0064579	49.3	yes	NA	NA	NA	NA	NA	NA
381	AASCAQLASLATSSTK	A0A1U8G4P2	Phosphoglucan, water dikinase, chloroplastic OS=Capsicum annuum OX=4072 GN=T459_32331	3	522.931	-1.5183	7.84e-05	61.962	yes	1.102	1.002	1.056	0.9	1.088	0.851
382	AASDAAFVAK	A0A2G2Z788	Mitochondrial import receptor subunit TOM9-1 (Fragment) OS=Capsicum annuum OX=4072 GN=T459_15823	2	475.751	-1.7379	3.1906e-05	121.9	yes	NA	NA	NA	NA	NA	NA
383	AASDASAPADAKPPVSK	A0A1U8DWX6	Uncharacterized protein OS=Capsicum annuum OX=4072 GN=T459_33523	4	396.457	-0.64189	1.5839e-07	71.601	yes	NA	NA	NA	NA	NA	NA
384	AASDASAPADAKPPVSK	A0A1U8DWX6	Uncharacterized protein OS=Capsicum annuum OX=4072 GN=T459_33523	3	528.274	-2.4205	2.6839e-10	80.545	yes	1.059	0.923	1.037	0.99	1.073	0.918
385	AASDDEPFSGLAFK	A0A2G3AEH8	Elongation factor G OS=Capsicum annuum OX=4072 GN=T459_00523	2	727.844	-0.89559	2.3743e-08	106.32	yes	1.038	0.998	0.951	1.021	1.047	0.945
386	AASEMAEAAASGGK	A0A2G3A0H6	Alanine--tRNA ligase OS=Capsicum annuum OX=4072 GN=T459_09845	3	422.859	-0.93205	4.0673e-05	72.891	yes	0.986	0.986	0.963	0.972	1.048	1.045
387	AASEMAEAAASGGK	A0A2G3A0H6	Alanine--tRNA ligase OS=Capsicum annuum OX=4072 GN=T459_09845	2	633.785	-2.2744	0.0017203	54.898	yes	1.047	1.068	0.975	0.828	1.044	1.037
388	AASEMAEAAASGGK	A0A2G3A0H6	Alanine--tRNA ligase OS=Capsicum annuum OX=4072 GN=T459_09845	3	417.528	-1.0277	0.0013914	50.897	yes	1.011	1.033	0.906	0.963	1.15	0.937
389	AASEMAEAAASGGK	A0A2G3A0H6	Alanine--tRNA ligase OS=Capsicum annuum OX=4072 GN=T459_09845	2	625.788	-1.7598	6.4903e-13	118.52	yes	1.001	1.028	0.972	0.984	1.026	0.989
390	AASESAELLYK	A0A1U8FNU7	Protein CROWDED NUCLEI 4 OS=Capsicum annuum OX=4072 GN=T459_06556	2	591.306	-2.278	2.3799e-07	107.06	yes	0.923	0.907	0.966	1.034	1.113	1.057
391	AASESVDFQNK	A0A1U8GBL3	Serpin-ZX OS=Capsicum annuum OX=4072 GN=T459_13124	3	399.191	0.03915	7.8777e-08	105.98	yes	0.899	0.924	0.93	1.079	1.139	1.029
392	AASESVDFQNK	A0A1U8GBL3	Serpin-ZX OS=Capsicum annuum OX=4072 GN=T459_13124	2	598.283	-1.6367	2.4664e-08	122.33	yes	0.987	0.894	0.924	1.023	1.136	1.036
393	AASESVDFTNK	A0A2G2ZRV1	Serpin-ZX OS=Capsicum annuum OX=4072 GN=T459_13127	2	584.778	-2.8066	0.012091	53.237	yes	NA	NA	NA	NA	NA	NA
394	AASEVICSR	A0A1U8GCB4	Annexin OS=Capsicum annuum OX=4072 GN=T459_32926	2	496.745	-1.0317	0.026542	54.722	yes	0.904	0.978	0.869	0.968	1.129	1.152
395	AASFNIIPSSTGAAK	A0A1U8F1D8	Glyceraldehyde-3-phosphate dehydrogenase OS=Capsicum annuum OX=4072 GN=T459_27945	3	478.924	-0.94483	0.00019047	57.288	yes	NA	NA	NA	NA	NA	NA
396	AASFNIIPSSTGAAK	A0A1U8F1D8	Glyceraldehyde-3-phosphate dehydrogenase OS=Capsicum annuum OX=4072 GN=T459_27945	2	717.883	-1.9195	2.1032e-07	92.265	yes	0.927	0.876	0.961	0.984	1.166	1.086
397	AASFNIIPSSTGAAK	A0A1U8F1D8	Glyceraldehyde-3-phosphate dehydrogenase OS=Capsicum annuum OX=4072 GN=T459_27945	3	478.924	-0.77693	1.314e-06	77.42	yes	1.011	0.874	0.932	0.938	1.21	1.034
398	AASFNIIPSSTGAAK	A0A1U8F1D8	Glyceraldehyde-3-phosphate dehydrogenase OS=Capsicum annuum OX=4072 GN=T459_27945	4	359.445	0.54638	4.2435e-06	71.279	yes	0.973	0.936	1.068	0.981	1.081	0.961
399	AASFNIIPSSTGAAK	A0A1U8F1D8	Glyceraldehyde-3-phosphate dehydrogenase OS=Capsicum annuum OX=4072 GN=T459_27945	2	717.883	-1.0787	1.207e-06	82.651	yes	NA	NA	NA	NA	NA	NA
400	AASFNIIPSSTGAAK	A0A1U8F1D8	Glyceraldehyde-3-phosphate dehydrogenase OS=Capsicum annuum OX=4072 GN=T459_27945	3	478.924	-0.8538	9.3017e-06	69.261	yes	0.983	0.993	1.017	0.936	1.062	1.009
401	AASFNIIPSSTGAAK	A0A1U8F1D8	Glyceraldehyde-3-phosphate dehydrogenase OS=Capsicum annuum OX=4072 GN=T459_27945	2	717.883	-1.3121	5.2777e-06	77.42	yes	1	0.866	0.937	1.055	1.038	1.105
402	AASFNIIPSSTGAAK	A0A1U8F1D8	Glyceraldehyde-3-phosphate dehydrogenase OS=Capsicum annuum OX=4072 GN=T459_27945	2	718.375	-2.1218	0.00033779	65.374	yes	1.062	0.862	0.992	1.068	1.021	0.995
403	AASFNIIPSSTGAAK	A0A1U8F1D8	Glyceraldehyde-3-phosphate dehydrogenase OS=Capsicum annuum OX=4072 GN=T459_27945	2	718.375	-1.8467	0.00077746	61.444	yes	1.006	0.952	1.121	0.985	0.982	0.955
404	AASKPASSGSPWYGPDR	A0A1U8FAB3	Chlorophyll a-b binding protein, chloroplastic OS=Capsicum annuum OX=4072 GN=T459_05312	3	578.613	-1.8332	6.1657e-05	62.94	yes	1.001	0.947	0.935	1.009	1.056	1.051
405	AASKPASSGSPWYGPDR	A0A1U8FAB3	Chlorophyll a-b binding protein, chloroplastic OS=Capsicum annuum OX=4072 GN=T459_05312	3	578.613	-2.4057	2.2048e-10	82.121	yes	0.991	0.93	0.929	1.013	1.068	1.069
406	AASKPASSGSPWYGPDR	A0A1U8FAB3	Chlorophyll a-b binding protein, chloroplastic OS=Capsicum annuum OX=4072 GN=T459_05312	3	578.613	-1.9226	0.0055776	38.376	yes	0.923	0.837	0.928	1.193	0.808	1.311
407	AASKPASSGSPWYGPDR	A0A1U8FAB3	Chlorophyll a-b binding protein, chloroplastic OS=Capsicum annuum OX=4072 GN=T459_05312	3	578.613	-1.456	1.1592e-39	141.86	yes	1.146	0.938	0.974	0.933	1.046	0.963
408	AASKPASSGSPWYGPDR	A0A1U8FAB3	Chlorophyll a-b binding protein, chloroplastic OS=Capsicum annuum OX=4072 GN=T459_05312	3	578.613	-0.86123	0.028324	32.329	yes	1.023	0.83	0.969	1.048	0.991	1.138
409	AASKPASSGSPWYGPDR	A0A1U8FAB3	Chlorophyll a-b binding protein, chloroplastic OS=Capsicum annuum OX=4072 GN=T459_05312	3	578.613	-1.4056	0.0039542	41.482	yes	0.89	0.979	0.863	1.253	0.74	1.274
410	AASKPASSGSPWYGPDR	A0A1U8FAB3	Chlorophyll a-b binding protein, chloroplastic OS=Capsicum annuum OX=4072 GN=T459_05312	4	434.212	-0.28112	2.316e-14	104.21	yes	1.055	1.041	0.958	0.955	1.118	0.872
411	AASKPASSGSPWYGPDR	A0A1U8FAB3	Chlorophyll a-b binding protein, chloroplastic OS=Capsicum annuum OX=4072 GN=T459_05312	2	867.416	-1.7962	9.0862e-54	181.4	yes	1.062	1.069	0.987	0.906	1.066	0.909
412	AASKPASSGSPWYGPDR	A0A1U8FAB3	Chlorophyll a-b binding protein, chloroplastic OS=Capsicum annuum OX=4072 GN=T459_05312	3	578.613	-1.2784	2.8993e-10	79.837	yes	0.972	0.929	1.013	0.967	1.107	1.013
413	AASKPASSGSPWYGPDR	A0A1U8FAB3	Chlorophyll a-b binding protein, chloroplastic OS=Capsicum annuum OX=4072 GN=T459_05312	3	578.613	-0.61752	1.3193e-23	124.25	yes	0.991	0.907	0.98	0.952	1.125	1.045
414	AASKPASSGSPWYGPDR	A0A1U8FAB3	Chlorophyll a-b binding protein, chloroplastic OS=Capsicum annuum OX=4072 GN=T459_05312	4	434.212	0.11142	3.1712e-12	95.197	yes	0.948	0.974	0.975	1	1.075	1.028
415	AASKPASSGSPWYGPDR	A0A1U8FAB3	Chlorophyll a-b binding protein, chloroplastic OS=Capsicum annuum OX=4072 GN=T459_05312	3	578.613	-1.2844	3.4129e-14	105.89	yes	0.925	0.982	0.939	0.945	1.256	0.953
416	AASKPASSGSPWYGPDR	A0A1U8FAB3	Chlorophyll a-b binding protein, chloroplastic OS=Capsicum annuum OX=4072 GN=T459_05312	3	578.613	-1.7009	6.345e-31	132.79	yes	0.883	1.04	1.026	0.879	1.18	0.992
417	AASKPASSGSPWYGPDR	A0A1U8FAB3	Chlorophyll a-b binding protein, chloroplastic OS=Capsicum annuum OX=4072 GN=T459_05312	3	578.613	-1.6621	0.00092945	49.535	yes	0.469	0.658	0.855	0.528	2.618	0.872
418	AASLYGDAR	A0A1U8FV12	Uncharacterized protein OS=Capsicum annuum OX=4072 GN=T459_05277	2	462.233	0.54706	0.0055321	77.732	yes	0.992	1.103	0.971	0.948	1.005	0.98
419	AASSEPETVLHYEFMQDYK	A0A1U8G5L9	7-hydroxymethyl chlorophyll a reductase, chloroplastic OS=Capsicum annuum OX=4072 GN=T459_07599	3	754.34	-2.6504	9.3647e-13	81.346	yes	1.041	0.938	0.996	0.986	1.069	0.969
420	AASSEPETVLHYEFMQDYK	A0A1U8G5L9	7-hydroxymethyl chlorophyll a reductase, chloroplastic OS=Capsicum annuum OX=4072 GN=T459_07599	3	749.009	-1.3466	6.582e-36	132.64	yes	1.02	1.084	1.01	0.962	1.005	0.919
421	AASSSSSLEKEPTQK	A0A1U8ELA2	Fructokinase-like 2, chloroplastic OS=Capsicum annuum OX=4072 GN=T459_27128	3	517.262	-2.2536	0.045501	29.355	yes	1.111	0.851	0.979	0.969	1.195	0.894
422	AASSYADELVK	A0A2G3AH23	Fructose-bisphosphate aldolase OS=Capsicum annuum OX=4072 GN=T459_01409	3	385.196	0.72174	0.00068449	66.056	yes	NA	NA	NA	NA	NA	NA
423	AASSYADELVK	A0A2G3AH23	Fructose-bisphosphate aldolase OS=Capsicum annuum OX=4072 GN=T459_01409	2	577.29	-1.4892	0.00072284	78.342	yes	1.045	0.972	1.027	0.94	0.978	1.038
424	AATAEDPDWLLDQR	A0A1U8FQ97	Uncharacterized protein OS=Capsicum annuum OX=4072 GN=T459_06555	2	800.884	-1.4888	1.296e-05	94.023	yes	1.049	0.959	0.927	1.018	1.008	1.041
425	AATAEDPDWLLDQR	A0A1U8FQ97	Uncharacterized protein OS=Capsicum annuum OX=4072 GN=T459_06555	3	534.258	-0.54889	0.0012209	52.5	yes	NA	NA	NA	NA	NA	NA
426	AATAEDPDWLLDQR	A0A1U8FQ97	Uncharacterized protein OS=Capsicum annuum OX=4072 GN=T459_06555	3	534.258	0.5413	7.1453e-05	69.92	yes	NA	NA	NA	NA	NA	NA
427	AATAEDPDWLLDQR	A0A1U8FQ97	Uncharacterized protein OS=Capsicum annuum OX=4072 GN=T459_06555	2	800.884	-0.054767	2.9796e-19	130.19	yes	1.006	1.018	0.861	1.042	1.034	1.04
428	AATAGEPKPVYVGGDYR	A0A1U8E1T5	Putative mitochondrial-processing peptidase subunit alpha-1 OS=Capsicum annuum OX=4072 GN=T459_24308	3	584.297	-1.2807	1.0984e-11	92.439	yes	NA	NA	NA	NA	NA	NA
429	AATAGEPKPVYVGGDYR	A0A1U8E1T5	Putative mitochondrial-processing peptidase subunit alpha-1 OS=Capsicum annuum OX=4072 GN=T459_24308	4	438.474	-0.12189	0.001458	43.208	yes	NA	NA	NA	NA	NA	NA
430	AATAGVSYSDR	A0A2G3AP59	Uncharacterized protein OS=Capsicum annuum OX=4072 GN=T459_03904	2	549.265	-1.9235	1.8705e-05	96.604	yes	0.298	0.288	0.255	1.6	1.841	1.718
431	AATAPPNSLNK	A0A2G2XYV4	Uncharacterized protein (Fragment) OS=Capsicum annuum OX=4072 GN=T459_33488	3	361.865	0.019115	0.0054296	46.73	yes	0.845	0.853	0.824	1.173	1.15	1.155
432	AATAPPNSLNK	A0A2G2XYV4	Uncharacterized protein (Fragment) OS=Capsicum annuum OX=4072 GN=T459_33488	2	542.293	-1.6491	0.00042963	83.045	yes	NA	NA	NA	NA	NA	NA
433	AATAVANSLNK	A0A1U8H291	Vesicle-associated membrane protein OS=Capsicum annuum OX=4072 GN=T459_18442	3	353.865	-0.53865	0.00096814	63.073	yes	0.836	0.83	0.891	1.191	1.128	1.124
434	AATDNFSPTCLIK	A0A2G3ABB5	Uncharacterized protein OS=Capsicum annuum OX=4072 GN=T459_06640	3	479.906	-0.6844	0.0044043	44.426	yes	NA	NA	NA	NA	NA	NA
435	AATDPVFPPGVIDVHGILR	A0A1U8EPI6	Uncharacterized protein OS=Capsicum annuum OX=4072 GN=T459_03657	3	658.698	-0.9861	7.2798e-07	66.893	yes	NA	NA	NA	NA	NA	NA
436	AATEDAEASEDVPLLEESRPSGGTITAADPK	A0A2G2ZTQ9	26S proteasome non-ATPase regulatory subunit 1 homolog OS=Capsicum annuum OX=4072 GN=T459_07465	4	782.628	-1.4753	0.023968	19.733	yes	0.994	0.99	0.945	0.956	1.043	1.071
437	AATGEEVSAEDLGGATVHCK	A0A1U8DZI7	Methylcrotonoyl-CoA carboxylase beta chain, mitochondrial OS=Capsicum annuum OX=4072 GN=T459_33045	4	501.235	-0.90087	2.682e-13	84.249	yes	NA	NA	NA	NA	NA	NA
438	AATGEEVSAEDLGGATVHCK	A0A1U8DZI7	Methylcrotonoyl-CoA carboxylase beta chain, mitochondrial OS=Capsicum annuum OX=4072 GN=T459_33045	3	667.978	-2.2261	6.9838e-24	117.78	yes	0.904	0.997	1.043	0.96	1.107	0.989
439	AATGGSEVLLR	A0A1U8E588	Uncharacterized protein OS=Capsicum annuum OX=4072 GN=T459_23747	2	537.301	-1.7401	0.00072284	78.342	yes	NA	NA	NA	NA	NA	NA
440	AATGVGVMMSDHK	A0A1U8E3G8	S-(hydroxymethyl)glutathione dehydrogenase OS=Capsicum annuum OX=4072 GN=T459_23668	3	445.873	-1.1541	0.0010315	53.034	yes	0.874	0.965	1.1	1.127	0.886	1.048
441	AATGVGVMMSDHK	A0A1U8E3G8	S-(hydroxymethyl)glutathione dehydrogenase OS=Capsicum annuum OX=4072 GN=T459_23668	3	445.873	-0.85582	0.0021771	45.28	yes	0.951	0.962	1.02	0.962	0.998	1.108
442	AATGVGVMMSDHK	A0A1U8E3G8	S-(hydroxymethyl)glutathione dehydrogenase OS=Capsicum annuum OX=4072 GN=T459_23668	3	440.541	-1.438	0.00057136	60.157	yes	NA	NA	NA	NA	NA	NA
443	AATLHDGMLSTK	A0A2G3A0H5	Uncharacterized protein OS=Capsicum annuum OX=4072 GN=T459_09839	3	420.88	-0.3888	0.0065699	41.242	yes	NA	NA	NA	NA	NA	NA
444	AATLMLQR	A0A2G2Y6C6	Uncharacterized protein OS=Capsicum annuum OX=4072 GN=T459_29703	2	452.258	-0.86211	0.015994	76.478	yes	0.977	0.869	1.008	1.03	1.023	1.092
445	AATNGFSSELIVSESGEK	A0A1U8EA32	Putative serine/threonine-protein kinase OS=Capsicum annuum OX=4072 GN=T459_03152	3	609.627	-0.63954	0.00056432	48.376	yes	0.881	1.011	0.984	0.994	1.076	1.052
446	AATNNFSSEFIVSESGEK	A0A1U8GAD8	Putative serine/threonine-protein kinase OS=Capsicum annuum OX=4072 GN=T459_13474	3	639.634	-1.9432	0.002667	39.387	yes	NA	NA	NA	NA	NA	NA
447	AATPQETLK	A0A2G2Y413	Uncharacterized protein OS=Capsicum annuum OX=4072 GN=T459_31660	2	479.764	-2.5021	0.0011404	102.52	yes	0.692	0.604	0.693	1.323	1.341	1.346
448	AATPQETLK	A0A2G2Y413	Uncharacterized protein OS=Capsicum annuum OX=4072 GN=T459_31660	3	320.178		0.016751	39.305	yes	NA	NA	NA	NA	NA	NA
449	AATSSEEGQVFGCHNVEEWDQHFK	Q6RJZ7	Thioredoxin OS=Capsicum annuum OX=4072 GN=T459_13310	4	709.308	-1.5713	3.9961e-06	48.5	yes	NA	NA	NA	NA	NA	NA
450	AATSSEEGQVFGCHNVEEWDQHFK	Q6RJZ7	Thioredoxin OS=Capsicum annuum OX=4072 GN=T459_13310	4	709.308	-1.5774	9.0358e-39	111.65	yes	1.104	0.904	0.927	1.004	1.059	1.002
451	AATTEEMLHR	A0A1U8GHA4	Uncharacterized protein OS=Capsicum annuum OX=4072 GN=T459_34913	3	392.189	0.090591	0.000686	71.614	yes	NA	NA	NA	NA	NA	NA
452	AATTEEMLHR	A0A1U8GHA4	Uncharacterized protein OS=Capsicum annuum OX=4072 GN=T459_34913	3	386.857	-0.55083	0.0075079	47.187	yes	1.05	1.005	0.9	1.024	1.055	0.967
453	AATTLDMGAGHVDPNR	A0A1U8FIT0	Uncharacterized protein OS=Capsicum annuum OX=4072 GN=T459_02595	3	547.926	-1.1206	8.1638e-08	82.663	yes	1.041	1.176	0.85	0.999	1.014	0.919
454	AATTLDMGAGHVDPNR	A0A1U8FIT0	Uncharacterized protein OS=Capsicum annuum OX=4072 GN=T459_02595	3	547.926	-0.24471	4.3675e-05	62.861	yes	NA	NA	NA	NA	NA	NA
455	AATTLDMGAGHVDPNR	A0A1U8FIT0	Uncharacterized protein OS=Capsicum annuum OX=4072 GN=T459_02595	3	542.595	-0.33364	1.8503e-28	136.81	yes	1.029	1.068	1.072	0.862	1.046	0.923
456	AATVSIDDFYLTAEEQAK	A0A1U8FV49	D-glycerate 3-kinase, chloroplastic OS=Capsicum annuum OX=4072 GN=T459_10897	3	657.99	-0.96516	7.0588e-44	153.23	yes	0.967	0.998	0.956	0.954	1.039	1.087
457	AAVDAGFVPNDLQVGQTGK	A0A2G2ZY23	Electron transfer flavoprotein subunit alpha, mitochondrial OS=Capsicum annuum OX=4072 GN=T459_08975	3	629.658	-1.4438	7.9768e-09	74.793	yes	1.012	0.866	0.936	0.95	1.183	1.054
458	AAVDAVTR	A0A2G2Z682	Peroxisomal 2,4-dienoyl-CoA reductase OS=Capsicum annuum OX=4072 GN=T459_21040	2	401.725	-0.60696	0.022124	70.856	yes	NA	NA	NA	NA	NA	NA
459	AAVDLCHR	A0A1U8GBP1	Uncharacterized protein OS=Capsicum annuum OX=4072 GN=T459_13266	3	314.492	0.82093	0.0062888	67.981	yes	0.93	1.055	1.094	1.02	0.898	1.003
460	AAVDSEMEVLSR	A0A2G2ZZ54	Uncharacterized protein OS=Capsicum annuum OX=4072 GN=T459_09368	2	661.816	-2.0404	0.0089902	45.764	yes	1.158	1.07	1.061	0.878	0.96	0.873
461	AAVEEGIVAGGGVALLYAAR	A0A1U8G5L2	Chaperonin CPN60-2, mitochondrial OS=Capsicum annuum OX=4072 GN=T459_07591	3	629.683	-0.3523	0.015825	29.603	yes	NA	NA	NA	NA	NA	NA
462	AAVEEGIVPGGGVALLYASK	A0A1U8GR36	Chaperonin CPN60-2, mitochondrial OS=Capsicum annuum OX=4072 GN=T459_15223	3	634.351	-0.89836	1.4743e-17	93.812	no	1.005	0.932	0.936	1.025	1.131	0.971
463	AAVEEGIVPGGGVALLYASK	A0A1U8GR36	Chaperonin CPN60-2, mitochondrial OS=Capsicum annuum OX=4072 GN=T459_15223	4	476.015	0.0027818	3.9969e-05	52.185	no	1.056	1.095	0.986	0.948	0.943	0.973
464	AAVEEGIVPGGGVALLYASK	A0A1U8GR36	Chaperonin CPN60-2, mitochondrial OS=Capsicum annuum OX=4072 GN=T459_15223	2	951.023	-0.96612	0.00027715	52.185	no	0.96	1.024	0.968	0.931	1.051	1.065
465	AAVEEGIVPGGGVALLYASK	A0A1U8GR36	Chaperonin CPN60-2, mitochondrial OS=Capsicum annuum OX=4072 GN=T459_15223	3	634.351	-1.4302	1.6405e-06	63.998	no	1.107	0.922	1.024	0.948	1.007	0.991
466	AAVEEGIVVGGGCALLR	A0A2G3AJ36	RuBisCO large subunit-binding protein subunit beta, chloroplastic OS=Capsicum annuum OX=4072 GN=T459_02139	3	557.635	-0.36528	0.00019124	55.755	yes	0.909	0.988	0.862	1.011	1.15	1.08
467	AAVEEGIVVGGGCALLR	A0A2G3AJ36	RuBisCO large subunit-binding protein subunit beta, chloroplastic OS=Capsicum annuum OX=4072 GN=T459_02139	2	835.948	-1.3329	4.2527e-55	178.03	yes	1.025	0.862	0.948	1.071	1.101	0.993
468	AAVEEGIVVGGGCTLLR	A0A2G3A3L0	RuBisCO large subunit-binding protein subunit beta, chloroplastic OS=Capsicum annuum OX=4072 GN=T459_10935	3	567.638	-0.42744	3.2363e-07	68.481	yes	1.235	0.818	0.886	0.948	0.948	1.165
469	AAVEEINSHK	A0A2G2ZVI9	Uncharacterized protein OS=Capsicum annuum OX=4072 GN=T459_08091	3	366.524	-0.63525	0.01523	42.336	yes	NA	NA	NA	NA	NA	NA
470	AAVEICK	B9VXZ6	NAD(P)H:quinone oxidoreductase OS=Capsicum annuum OX=4072 GN=NADPH	2	395.71	-0.68	0.016507	89.55	no	1.015	0.956	0.968	1.029	1.006	1.026
471	AAVEICKK	B9VXZ6	NAD(P)H:quinone oxidoreductase OS=Capsicum annuum OX=4072 GN=NADPH	3	306.841	-1.0757	0.013362	54.157	yes	0.95	0.889	0.918	1.06	1.174	1.009
472	AAVESILK	A0A2G2Z5Q5	Trigger factor-like protein TIG, Chloroplastic OS=Capsicum annuum OX=4072 GN=T459_20845	2	415.753	-0.92642	0.0069135	97.431	yes	1.112	1.029	1.037	0.904	0.987	0.93
473	AAVESILK	A0A2G2Z5Q5	Trigger factor-like protein TIG, Chloroplastic OS=Capsicum annuum OX=4072 GN=T459_20845	2	415.753	-0.54369	0.0068232	89.698	yes	1.043	0.977	1.105	1.023	0.901	0.951
474	AAVETVK	A0A1U8FMA7	Protein GRIP OS=Capsicum annuum OX=4072 GN=T459_06185	2	359.211	-2.676	0.0312	77.058	yes	0.85	0.893	0.829	1.092	1.242	1.094
475	AAVGAPNVLGDCPFSQR	A0A089FZ95	Dehydroascorbate reductase OS=Capsicum annuum OX=4072 GN=DHAR	2	879.933	-2.5918	2.798e-11	92.773	yes	1.071	1.026	1.024	0.905	0.952	1.021
476	AAVGAPNVLGDCPFSQR	A0A089FZ95	Dehydroascorbate reductase OS=Capsicum annuum OX=4072 GN=DHAR	3	586.958	-1.9005	0.00066288	48.899	yes	1.025	0.734	0.839	0.99	1.333	1.079
477	AAVHSFSDSLR	A0A2G2Y7P5	Uncharacterized protein OS=Capsicum annuum OX=4072 GN=T459_30134	3	397.204	0.49947	0.017032	38.783	yes	0.929	0.947	0.949	1.026	1.166	0.983
478	AAVIGDTIGDPLK	A0A1U8FVU1	Pyrophosphate-energized vacuolar membrane proton pump OS=Capsicum annuum OX=4072 GN=T459_10595	3	423.906	-0.17722	0.010191	36.32	yes	NA	NA	NA	NA	NA	NA
479	AAVINIVAHR	A0A2G2Z6A4	Annexin OS=Capsicum annuum OX=4072 GN=T459_20953	3	355.217	-0.32839	3.1872e-05	97.431	yes	1.046	1.274	0.909	0.901	0.787	1.083
480	AAVLAEMDAVGR	A0A1U8F7R4	Long chain acyl-CoA synthetase 7, peroxisomal OS=Capsicum annuum OX=4072 GN=T459_32996	2	609.811	-1.9281	0.0049243	51.162	yes	NA	NA	NA	NA	NA	NA
481	AAVLAEMDAVGR	A0A1U8F7R4	Long chain acyl-CoA synthetase 7, peroxisomal OS=Capsicum annuum OX=4072 GN=T459_32996	2	601.814	-1.7905	0.00070758	81.92	yes	NA	NA	NA	NA	NA	NA
482	AAVLAEMDAVGR	A0A1U8F7R4	Long chain acyl-CoA synthetase 7, peroxisomal OS=Capsicum annuum OX=4072 GN=T459_32996	3	401.545	0.0893	0.020689	35.138	yes	NA	NA	NA	NA	NA	NA
483	AAVLFEGGNWDR	A0A2G3ADI8	NAD(P)H-quinone oxidoreductase subunit S, chloroplastic OS=Capsicum annuum OX=4072 GN=T459_00130	3	445.554	-0.15387	0.0032852	49.28	yes	NA	NA	NA	NA	NA	NA
484	AAVPSFFNADEDEDAQK	A0A2G2YEM4	Uncharacterized protein OS=Capsicum annuum OX=4072 GN=T459_27687	3	618.611	-1.6941	2.1286e-14	106.14	yes	NA	NA	NA	NA	NA	NA
485	AAVPSGASTGIYEALELR	A0A2G2YPT6	Enolase OS=Capsicum annuum OX=4072 GN=T459_22470	3	602.32	-2.2429	1.2285e-24	128.82	yes	0.896	1.007	1.066	0.999	1.126	0.907
486	AAVPSGASTGIYEALELR	A0A2G2YPT6	Enolase OS=Capsicum annuum OX=4072 GN=T459_22470	2	902.976	-1.9752	6.6452e-31	133.78	yes	0.931	0.962	0.985	1.097	1.067	0.959
487	AAVPTIK	A0A1U8HDS2	Phosphoglycerate kinase OS=Capsicum annuum OX=4072 GN=T459_21043	2	350.224	-1.585	0.018351	87.323	yes	1.104	0.969	0.929	1.011	1.062	0.925
488	AAVPTIK	A0A1U8HDS2	Phosphoglycerate kinase OS=Capsicum annuum OX=4072 GN=T459_21043	3	233.818	-0.90595	0.011624	64.776	yes	1.035	1.038	0.98	1.1	0.971	0.876
489	AAVSAMPELLR	A0A2G3AIG1	Uncharacterized protein OS=Capsicum annuum OX=4072 GN=T459_01907	2	579.321	0.38074	0.0025172	66.663	yes	NA	NA	NA	NA	NA	NA
490	AAVSAMPELLR	A0A2G3AIG1	Uncharacterized protein OS=Capsicum annuum OX=4072 GN=T459_01907	2	579.321	-1.6698	0.00034022	84.479	yes	NA	NA	NA	NA	NA	NA
491	AAVSAMPELLR	A0A2G3AIG1	Uncharacterized protein OS=Capsicum annuum OX=4072 GN=T459_01907	2	587.318		0.0034816	48.028	yes	NA	NA	NA	NA	NA	NA
492	AAVSASLVK	A0A2G2Z1J1	Elongation factor Ts, mitochondrial OS=Capsicum annuum OX=4072 GN=EFTS	2	423.258	-1.8164	1.4316e-06	144.77	yes	1.08	0.909	1.009	0.91	1.099	0.994
493	AAVSASLVK	A0A2G2Z1J1	Elongation factor Ts, mitochondrial OS=Capsicum annuum OX=4072 GN=EFTS	3	282.508	-0.37845	0.00029864	101.54	yes	1.104	0.929	0.887	0.991	1.125	0.965
494	AAVSSLINSPK	A0A1U8G6S3	Pentatricopeptide repeat-containing protein OS=Capsicum annuum OX=4072 GN=T459_09609	3	362.877	0.452	5.083e-06	96.342	yes	NA	NA	NA	NA	NA	NA
495	AAVSSLINSPK	A0A1U8G6S3	Pentatricopeptide repeat-containing protein OS=Capsicum annuum OX=4072 GN=T459_09609	2	543.811	-1.5938	9.4644e-14	151.98	yes	1.087	0.959	0.962	0.94	1.033	1.019
496	AAVTEALTGVFR	A0A1U8FCZ3	Uncharacterized protein OS=Capsicum annuum OX=4072 GN=T459_12552	2	617.843	-1.3939	1.9599e-13	130.69	yes	1.008	0.988	0.911	1.042	1.024	1.026
497	AAVTEALTGVFR	A0A1U8FCZ3	Uncharacterized protein OS=Capsicum annuum OX=4072 GN=T459_12552	3	412.231	0.55146	1.2787e-08	107.06	yes	NA	NA	NA	NA	NA	NA
498	AAVTPAFAAQFPGLNGLGLSAAR	A0A1U8G802	Germin-like protein 1 OS=Capsicum annuum OX=4072 GN=T459_08102	3	734.395	-1.1479	3.6687e-44	141.08	yes	0.961	1.024	0.962	0.983	1.036	1.035
499	AAVTPAFAAQFPGLNGLGLSAAR	A0A1U8G802	Germin-like protein 1 OS=Capsicum annuum OX=4072 GN=T459_08102	4	551.048	-0.048438	4.8366e-36	120.41	yes	1.217	1.206	0.967	0.826	0.938	0.846
500	AAVTPAFAAQFPGLNGLGLSAAR	A0A1U8G802	Germin-like protein 1 OS=Capsicum annuum OX=4072 GN=T459_08102	2	1101.09	-0.56082	3.891e-42	132.72	yes	0.963	0.949	0.868	0.988	1.1	1.132
501	AAVTPAFAAQFPGLNGLGLSAAR	A0A1U8G802	Germin-like protein 1 OS=Capsicum annuum OX=4072 GN=T459_08102	4	551.048	0.44094	7.5693e-16	81.144	yes	0.844	1.002	0.993	0.893	1.228	1.04
502	AAVTPAFAAQFPGLNGLGLSAAR	A0A1U8G802	Germin-like protein 1 OS=Capsicum annuum OX=4072 GN=T459_08102	2	1101.09	-0.46269	4.6292e-26	102.66	yes	1.086	0.861	1.049	0.995	1.029	0.978
503	AAVTPAFAAQFPGLNGLGLSAAR	A0A1U8G802	Germin-like protein 1 OS=Capsicum annuum OX=4072 GN=T459_08102	4	551.048	-0.37998	4.8808e-16	83.871	yes	0.733	1	0.971	1.068	1.135	1.092
504	AAVTPAFAPQFPGLNGLGISMAR	A0A1U8HA07	Auxin-binding protein ABP19a OS=Capsicum annuum OX=4072 GN=T459_19490	3	768.4	-1.1632	1.7508e-05	53.96	yes	0.994	0.93	0.937	1.1	1.089	0.951
505	AAVTPAFAPQFPGLNGLGISMAR	A0A1U8HA07	Auxin-binding protein ABP19a OS=Capsicum annuum OX=4072 GN=T459_19490	3	768.4	-0.24795	7.1845e-05	46.569	yes	0.896	1.048	1.022	1.18	0.958	0.895
506	AAVTPAFAPQFPGLNGLGISMAR	A0A1U8HA07	Auxin-binding protein ABP19a OS=Capsicum annuum OX=4072 GN=T459_19490	4	576.552	0.12599	2.7593e-05	49.125	yes	1.034	0.919	0.836	1.175	1.023	1.014
507	AAVTPAFAPQFPGLNGLGISMAR	A0A1U8HA07	Auxin-binding protein ABP19a OS=Capsicum annuum OX=4072 GN=T459_19490	4	572.553	-0.34922	5.3572e-37	129.77	yes	1.095	0.966	0.997	0.955	1.102	0.886
508	AAVTPAFAPQFPGLNGLGISMAR	A0A1U8HA07	Auxin-binding protein ABP19a OS=Capsicum annuum OX=4072 GN=T459_19490	2	1144.1	-0.67886	1.6292e-35	127.74	yes	0.992	1.005	0.954	1.075	0.937	1.036
509	AAVTPAFAPQFPGLNGLGISMAR	A0A1U8HA07	Auxin-binding protein ABP19a OS=Capsicum annuum OX=4072 GN=T459_19490	4	572.553	-0.35387	9.0022e-16	79.69	yes	0.972	1.014	0.83	1.035	0.951	1.198
510	AAVTPAFAPQFPGLNGLGISMAR	A0A1U8HA07	Auxin-binding protein ABP19a OS=Capsicum annuum OX=4072 GN=T459_19490	2	1144.1	-1.31	1.2667e-07	64.761	yes	1.06	0.892	0.951	0.957	1.103	1.038
511	AAVVGGNVLTSQR	A0A2G2YQS3	5-oxoprolinase OS=Capsicum annuum OX=4072 GN=T459_22892	2	636.357	-1.2022	0.00049801	77.185	yes	NA	NA	NA	NA	NA	NA
512	AAVVSDTELK	A0A2G3A550	Protein NRT1/ PTR FAMILY 8.2 OS=Capsicum annuum OX=4072 GN=T459_04451	2	516.782	-2.6786	3.1906e-05	121.9	yes	NA	NA	NA	NA	NA	NA
513	AAVYLEMGK	A0A1U8GC69	Hsp70-Hsp90 organizing protein 1 OS=Capsicum annuum OX=4072 GN=T459_00526	2	499.255	-1.9805	0.0085888	57.59	yes	0.918	0.888	0.887	1.008	1.143	1.155
514	AAVYLEMGK	A0A1U8GC69	Hsp70-Hsp90 organizing protein 1 OS=Capsicum annuum OX=4072 GN=T459_00526	3	333.172	0.36925	0.0077358	47.082	yes	0.847	1.031	0.879	1.028	1.085	1.131
515	AAVYVDK	A0A2G3AGG7	Uncharacterized protein OS=Capsicum annuum OX=4072 GN=T459_01218	2	383.211	-3.2753	0.05046	62.717	yes	NA	NA	NA	NA	NA	NA
516	AAWEELIYR	A0A2G3A0R6	Dihydropyrimidine dehydrogenase (NADP(+)), chloroplastic OS=Capsicum annuum OX=4072 GN=T459_09904	2	575.798	-1.6604	0.0045798	79.986	yes	0.937	0.888	0.983	1.018	1.128	1.048
517	AAWEFAEK	A0A2G2XXL3	Uncharacterized protein OS=Capsicum annuum OX=4072 GN=T459_33939	2	476.232	-1.6306	0.0049836	107.57	yes	1.049	0.989	0.906	1.009	1.063	0.983
518	AAWEIFTPLLHR	A0A1U8FSB9	Glucose-6-phosphate 1-dehydrogenase OS=Capsicum annuum OX=4072 GN=T459_07126	3	485.27	0.69709	0.00026565	74.53	yes	NA	NA	NA	NA	NA	NA
519	AAWTTYGTCLISK	A0A2G2YZZ1	Uncharacterized protein OS=Capsicum annuum OX=4072 GN=T459_18733	2	736.366	-1.4835	0.002795	62.088	yes	1.155	1.17	1.193	0.766	0.943	0.773
520	AAYAPLDQR	A0A1U8E5A8	50S ribosomal protein L13 OS=Capsicum annuum OX=4072 GN=T459_23835	2	502.762	-1.4821	0.026393	54.776	yes	1.087	1.046	0.944	0.94	1.025	0.959
521	AAYAPLDQR	A0A1U8E5A8	50S ribosomal protein L13 OS=Capsicum annuum OX=4072 GN=T459_23835	3	335.51	-0.75243	0.0045491	59.35	yes	NA	NA	NA	NA	NA	NA
522	AAYLQNLCEELNFDPQK	A0A2G2XVT4	Protein, chloroplastic OS=Capsicum annuum OX=4072 GN=T459_34548	3	684.995	-0.91235	0.000615	49.595	yes	1.048	0.968	0.901	1.045	1.088	0.951
523	AAYLQNLCEELNFDPQK	A0A2G2XVT4	Protein, chloroplastic OS=Capsicum annuum OX=4072 GN=T459_34548	4	513.998	-0.16771	0.011311	32.152	yes	NA	NA	NA	NA	NA	NA
524	AAYNNPER	A0A2G3AB18	Ubiquitin receptor RAD23c OS=Capsicum annuum OX=4072 GN=T459_06501	2	467.722	-0.82967	0.0068748	94.114	no	1.043	0.874	0.882	1.054	1.113	1.036
525	AAYNSPFEFK	A0A1U8EZN6	Uncharacterized protein OS=Capsicum annuum OX=4072 GN=T459_20487	2	587.774	-1.5682	0.035168	51.445	yes	NA	NA	NA	NA	NA	NA
526	AAYNSPFEFK	A0A1U8EZN6	Uncharacterized protein OS=Capsicum annuum OX=4072 GN=T459_20487	2	587.282	-2.3802	0.00080085	85.813	yes	1.022	0.925	0.966	0.985	1.111	0.991
527	AAYNSPFEFK	A0A1U8EZN6	Uncharacterized protein OS=Capsicum annuum OX=4072 GN=T459_20487	3	391.857	-0.64663	0.0013276	68.657	yes	0.918	0.868	1.072	1.011	1.179	0.953
528	AAYPIEYIPNAK	A0A1U8GJT2	Phosphoenolpyruvate carboxykinase [ATP] OS=Capsicum annuum OX=4072 GN=T459_12859	3	450.903	-0.26978	0.0022662	55.353	yes	NA	NA	NA	NA	NA	NA
529	AAYPIEYIPNAK	A0A1U8GJT2	Phosphoenolpyruvate carboxykinase [ATP] OS=Capsicum annuum OX=4072 GN=T459_12859	2	675.851	-1.3805	0.0018363	68.536	yes	NA	NA	NA	NA	NA	NA
530	AAYPIEYIPNAK	A0A1U8GJT2	Phosphoenolpyruvate carboxykinase [ATP] OS=Capsicum annuum OX=4072 GN=T459_12859	2	675.359	-1.6156	4.9542e-12	114.86	yes	0.839	0.834	0.775	1.131	1.274	1.148
531	AAYPIEYIPNAK	A0A1U8GJT2	Phosphoenolpyruvate carboxykinase [ATP] OS=Capsicum annuum OX=4072 GN=T459_12859	3	450.575	-0.14398	0.00050775	64.82	yes	0.81	0.777	0.858	1.024	1.43	1.101
532	ACAAAITLDTPGANYR	A0A2G2YXI5	K(+) efflux antiporter 1, chloroplastic OS=Capsicum annuum OX=4072 GN=T459_21757	3	555.607	-1.0283	1.9805e-06	74.133	yes	NA	NA	NA	NA	NA	NA
533	ACAAAITLDTPGANYR	A0A2G2YXI5	K(+) efflux antiporter 1, chloroplastic OS=Capsicum annuum OX=4072 GN=T459_21757	2	832.907	-1.4429	2.5032e-14	113.4	yes	0.972	0.949	0.877	0.929	1.127	1.145
534	ACAAQTNATFLK	A0A2G2XX05	26S protease regulatory subunit 6A-like protein OS=Capsicum annuum OX=4072 GN=T459_34111	3	432.88	-0.20604	0.013527	41.684	yes	NA	NA	NA	NA	NA	NA
535	ACAAQTNATFLK	A0A2G2XX05	26S protease regulatory subunit 6A-like protein OS=Capsicum annuum OX=4072 GN=T459_34111	3	432.552	-0.94703	0.0002294	79.492	yes	1.023	0.836	0.963	0.934	1.207	1.037
536	ACAAQTNATFLK	A0A2G2XX05	26S protease regulatory subunit 6A-like protein OS=Capsicum annuum OX=4072 GN=T459_34111	2	648.324	-2.2206	1.2219e-13	134.68	yes	0.903	0.943	0.923	1.036	1.188	1.006
537	ACASLEPNYQPPVTFVVVQK	A0A2G3A0W3	Protein argonaute 1A OS=Capsicum annuum OX=4072 GN=T459_09942	3	749.721	-1.7235	0.0017369	39.387	no	0.979	1.02	0.934	0.985	1.086	0.995
538	ACCAYQTWVMEFHK	A0A1U8G682	Caffeic acid 3-O-methyltransferase OS=Capsicum annuum OX=4072 GN=T459_09715	3	610.93	-0.9659	3.1723e-05	82.069	yes	0.963	0.983	1.017	0.921	1.143	0.972
539	ACCEASLK	A0A2G2Y0P8	Putative aldo-keto reductase 2 OS=Capsicum annuum OX=4072 GN=T459_32825	2	469.707		1.6297e-06	95.502	yes	NA	NA	NA	NA	NA	NA
540	ACDEQQHWK	A0A1U8F1S0	Clathrin heavy chain OS=Capsicum annuum OX=4072 GN=T459_16507	3	401.173	-1.017	0.0034699	66.299	yes	1.104	0.912	0.964	1.007	1.039	0.975
541	ACDLGLQVKPWVK	A0A2G2YU50	Aconitate hydratase OS=Capsicum annuum OX=4072 GN=T459_23936	3	505.278	-2.5435	1.0086e-12	116.51	yes	1.05	0.925	1.022	0.978	1.048	0.977
542	ACEDLIFNHLK	A0A2G2Y4I1	Inositol-1-monophosphatase OS=Capsicum annuum OX=4072 GN=T459_29059	3	453.896	0.48462	0.0010878	61.815	yes	NA	NA	NA	NA	NA	NA
543	ACEEILGLAK	A0A2G3A9F0	Uncharacterized protein OS=Capsicum annuum OX=4072 GN=T459_05995	2	552.292	-1.3696	0.00038344	90.15	yes	1.085	1.002	0.96	0.94	1.056	0.957
544	ACEEILGLAK	A0A2G3A9F0	Uncharacterized protein OS=Capsicum annuum OX=4072 GN=T459_05995	3	368.53	0.31837	0.0010674	71.451	yes	0.945	0.988	0.914	0.94	1.126	1.088
545	ACENAQQPLK	A0A2G3AHP8	C-1-tetrahydrofolate synthase, cytoplasmic OS=Capsicum annuum OX=4072 GN=T459_01612	3	386.857	-1.0074	0.0023615	58.699	yes	0.926	0.955	0.925	0.98	1.108	1.107
546	ACGISISSQFTQIEGR	A0A1U8HA05	Protein argonaute 9 OS=Capsicum annuum OX=4072 GN=T459_01828	3	585.289	-1.0808	7.7217e-05	62.055	yes	NA	NA	NA	NA	NA	NA
547	ACMSLPATK	A0A2G2ZG40	Chorismate synthase OS=Capsicum annuum OX=4072 GN=T459_13994	2	497.738	-2.5152	0.027898	44.863	yes	1.061	0.923	1.103	0.939	1.04	0.934
548	ACMSLPATK	A0A2G2ZG40	Chorismate synthase OS=Capsicum annuum OX=4072 GN=T459_13994	2	489.741	-1.9733	0.00097964	105.2	yes	1.122	1.017	0.992	0.925	1.002	0.942
549	ACMSLPATK	A0A2G2ZG40	Chorismate synthase OS=Capsicum annuum OX=4072 GN=T459_13994	3	326.83	-0.80682	0.0013773	77.732	yes	1.005	1.046	1.027	0.95	1.005	0.967
550	ACNALLLK	A0A2G3A202	Enolase OS=Capsicum annuum OX=4072 GN=T459_10327	2	451.76	-1.1685	0.0068668	93.429	yes	1.113	0.97	0.918	0.944	1.103	0.951
551	ACNALLLK	A0A2G3A202	Enolase OS=Capsicum annuum OX=4072 GN=T459_10327	3	301.509	0.14716	0.049503	35.295	yes	NA	NA	NA	NA	NA	NA
552	ACNFASGVVNLGHDVETR	A0A2G2YV04	Long chain acyl-CoA synthetase 9, chloroplastic OS=Capsicum annuum OX=4072 GN=T459_24357	3	649.311	-1.1286	4.6385e-11	84.249	yes	NA	NA	NA	NA	NA	NA
553	ACPTDVLEMIPWDGCK	J7HAV1	Photosystem I iron-sulfur center OS=Capsicum annuum OX=4072 GN=psaC	3	636.616	-0.89921	5.6578e-29	139.3	yes	1.015	0.917	0.942	1.016	1.032	1.078
554	ACPTDVLEMIPWDGCK	J7HAV1	Photosystem I iron-sulfur center OS=Capsicum annuum OX=4072 GN=psaC	4	477.714	0.11696	4.7954e-05	61.409	yes	1	0.839	0.86	1.176	1.212	0.912
555	ACPTDVLEMIPWDGCK	J7HAV1	Photosystem I iron-sulfur center OS=Capsicum annuum OX=4072 GN=psaC	4	477.714	-0.13798	4.893e-21	124.07	yes	0.937	0.897	1.036	1.066	1.032	1.033
556	ACPTDVLEMIPWDGCK	J7HAV1	Photosystem I iron-sulfur center OS=Capsicum annuum OX=4072 GN=psaC	3	636.616	-2.1343	0.0004521	50.305	yes	0.971	0.886	1.007	1.066	1.066	1.004
557	ACPTDVLEMIPWDGCK	J7HAV1	Photosystem I iron-sulfur center OS=Capsicum annuum OX=4072 GN=psaC	3	636.616	-1.5774	5.9214e-11	102.5	yes	0.947	1.051	0.996	0.995	1.023	0.988
558	ACPTDVLEMIPWDGCK	J7HAV1	Photosystem I iron-sulfur center OS=Capsicum annuum OX=4072 GN=psaC	4	477.714	-0.44177	5.2616e-08	84.753	yes	1.062	1.136	1.109	0.905	0.825	0.963
559	ACPTDVLEMIPWDGCK	J7HAV1	Photosystem I iron-sulfur center OS=Capsicum annuum OX=4072 GN=psaC	2	954.42	-1.1672	3.756e-06	73.834	yes	1.047	1.043	0.945	0.936	1.059	0.969
560	ACPTDVLEMIPWDGCK	J7HAV1	Photosystem I iron-sulfur center OS=Capsicum annuum OX=4072 GN=psaC	3	636.616	-1.1484	1.1072e-06	74.789	yes	NA	NA	NA	NA	NA	NA
561	ACPTDVLEMIPWDGCK	J7HAV1	Photosystem I iron-sulfur center OS=Capsicum annuum OX=4072 GN=psaC	3	636.616	-0.81935	0.00037559	51.771	yes	NA	NA	NA	NA	NA	NA
562	ACPTDVLEMIPWDGCK	J7HAV1	Photosystem I iron-sulfur center OS=Capsicum annuum OX=4072 GN=psaC	3	636.616	-1.0592	0.0017995	42.242	yes	NA	NA	NA	NA	NA	NA
563	ACPTDVLEMIPWDGCK	J7HAV1	Photosystem I iron-sulfur center OS=Capsicum annuum OX=4072 GN=psaC	3	631.284	-1.1784	1.6759e-15	118.52	yes	1.107	0.936	0.901	0.967	1.149	0.94
564	ACPTDVLEMIPWDGCK	J7HAV1	Photosystem I iron-sulfur center OS=Capsicum annuum OX=4072 GN=psaC	3	631.284	-1.0454	1.4772e-21	129.77	yes	1.009	0.939	1.007	1.023	1.054	0.967
565	ACPTDVLEMIPWDGCK	J7HAV1	Photosystem I iron-sulfur center OS=Capsicum annuum OX=4072 GN=psaC	2	946.423	-0.54616	2.9397e-14	112.17	yes	1.025	0.999	1.048	0.853	1.089	0.986
566	ACPTDVLEMIPWDGCK	J7HAV1	Photosystem I iron-sulfur center OS=Capsicum annuum OX=4072 GN=psaC	4	473.715	0.12443	4.1108e-15	112.42	yes	1.05	1.031	1.051	0.981	0.982	0.906
567	ACPTDVLEMIPWDGCK	J7HAV1	Photosystem I iron-sulfur center OS=Capsicum annuum OX=4072 GN=psaC	3	631.284	-1.2668	1.254e-07	82.651	yes	1.023	1.007	0.947	0.983	0.984	1.056
568	ACQLLVQK	A0A2G3A1V9	Uncharacterized protein OS=Capsicum annuum OX=4072 GN=T459_10314	2	480.271	-1.1554	0.0168	75.738	no	NA	NA	NA	NA	NA	NA
569	ACRPNSALTVR	A0A2G2YFT1	Outer envelope protein 80, chloroplastic OS=Capsicum annuum OX=4072 GN=T459_28056	3	415.556	-0.17989	0.018439	42.031	yes	1.038	0.91	0.956	0.981	1.133	0.982
570	ACTHENPLIR	A0A2G2Z2U4	Chitin elicitor receptor kinase 1 OS=Capsicum annuum OX=4072 GN=T459_19840	3	404.205	-0.06179	0.00063441	76.1	yes	1.028	1.007	0.79	1.11	1.021	1.044
571	ACTHYPTLFDNFQR	A0A2G3A0H5	Uncharacterized protein OS=Capsicum annuum OX=4072 GN=T459_09839	3	590.607	-2.8314	0.034826	28.812	yes	1.051	0.94	0.97	0.979	1.038	1.023
572	ACVVFPDKPEK	A0A1U8H521	Protein LOW PSII ACCUMULATION 3, chloroplastic OS=Capsicum annuum OX=4072 GN=T459_17547	4	323.169	-0.032648	0.0037422	47.302	yes	1.084	0.989	1.066	0.885	0.985	0.99
573	ACVVFPDKPEK	A0A1U8H521	Protein LOW PSII ACCUMULATION 3, chloroplastic OS=Capsicum annuum OX=4072 GN=T459_17547	3	430.557	-0.99942	0.0061293	50.353	yes	1.111	1.018	0.951	0.927	1.022	0.972
574	ACYPILK	A0A2G3AIQ7	50S ribosomal protein L22, chloroplastic OS=Capsicum annuum OX=4072 GN=T459_02007	2	432.736	-1.1986	0.016808	92.692	yes	NA	NA	NA	NA	NA	NA
575	ACYPILK	A0A2G3AIQ7	50S ribosomal protein L22, chloroplastic OS=Capsicum annuum OX=4072 GN=T459_02007	3	288.826	0.13404	0.03705	43.066	yes	NA	NA	NA	NA	NA	NA
576	ADAFEYADQVLEK	A0A1U8E5D6	UPF0603 protein, chloroplastic OS=Capsicum annuum OX=4072 GN=T459_22341	3	500.24	-0.84332	0.00016409	67.997	yes	NA	NA	NA	NA	NA	NA
577	ADAFEYADQVLEK	A0A1U8E5D6	UPF0603 protein, chloroplastic OS=Capsicum annuum OX=4072 GN=T459_22341	4	375.432	0.033724	0.016435	31.675	yes	NA	NA	NA	NA	NA	NA
578	ADAFLLVGTQPR	A0A1U8EU30	NADH-ubiquinone oxidoreductase 75 kDa subunit, mitochondrial OS=Capsicum annuum OX=4072 GN=T459_29172	2	644.356	-1.6243	4.0625e-08	107.65	yes	1.11	0.903	0.953	0.987	1.047	0.999
579	ADAFLLVGTQPR	A0A1U8EU30	NADH-ubiquinone oxidoreductase 75 kDa subunit, mitochondrial OS=Capsicum annuum OX=4072 GN=T459_29172	3	429.907	-0.080391	0.010077	41.242	yes	NA	0.914	0.573	0.867	1.014	1.632
580	ADAGHVGVEK	A0A1U8E4G4	Chloroplast stem-loop binding protein of 41 kDa a, chloroplastic OS=Capsicum annuum OX=4072 GN=T459_23325	3	328.17	-0.90575	0.002929	56.404	yes	0.965	0.927	0.911	1.066	1.121	1.011
581	ADAGHVGVEK	A0A1U8E4G4	Chloroplast stem-loop binding protein of 41 kDa a, chloroplastic OS=Capsicum annuum OX=4072 GN=T459_23325	2	491.751	-2.1489	0.016044	54.259	yes	0.936	0.757	0.848	1.221	1.237	1.001
582	ADAHGKDQEIYSVK	A0A2G2ZVY7	Callose synthase 1 OS=Capsicum annuum OX=4072 GN=T459_08256	4	390.947	-1.0781	0.00025541	63.185	yes	NA	NA	NA	NA	NA	NA
584	ADAPSFVQIL	A0A2G2ZQT3	Protein AUXIN SIGNALING F-BOX 2 OS=Capsicum annuum OX=4072 GN=T459_12764	2	530.787	-0.66952	0.0089756	59.908	yes	NA	NA	NA	NA	NA	NA
585	ADASLLESTVFR	A0A1U8GJ76	Phosphoacetylglucosamine mutase OS=Capsicum annuum OX=4072 GN=T459_00803	3	436.898	-0.57114	0.0021494	53.388	yes	NA	NA	NA	NA	NA	NA
586	ADATIPDNQLLIPLK	A0A2G3AHD3	UPF0061 protein OS=Capsicum annuum OX=4072 GN=T459_01538	3	541.31	-1.268	0.00052208	53.377	yes	0.993	0.906	0.891	1.01	1.15	1.049
587	ADDATHFLDVIR	A0A1U8F1S0	Clathrin heavy chain OS=Capsicum annuum OX=4072 GN=T459_16507	3	458.233		6.152e-05	62.088	yes	NA	NA	NA	NA	NA	NA
588	ADDATQFLDVIR	A0A2G2ZWP4	Clathrin heavy chain OS=Capsicum annuum OX=4072 GN=T459_08518	2	682.346	-1.2184	0.022439	45.28	yes	NA	NA	NA	NA	NA	NA
589	ADDCIGPEVEK	A0A2G2Z688	Phosphoglycerate kinase OS=Capsicum annuum OX=4072 GN=T459_21042	2	616.777	-1.6094	0.00049978	81.92	yes	0.984	0.856	1.032	1.075	1.052	1.001
590	ADDGSDTVTFMFESPTQDK	A0A1U8H2L3	Proliferating cell nuclear antigen OS=Capsicum annuum OX=4072 GN=T459_18302	3	702.965	-1.6627	2.937e-06	62.203	yes	0.993	1.04	1.02	0.982	0.986	0.98
591	ADDGSDTVTFMFESPTQDK	A0A1U8H2L3	Proliferating cell nuclear antigen OS=Capsicum annuum OX=4072 GN=T459_18302	3	697.633	-1.1886	4.5191e-17	90.385	yes	1.042	0.982	0.934	0.962	1.029	1.052
592	ADDGSFLHR	A0A2G2Y6D5	Aspartyl aminopeptidase OS=Capsicum annuum OX=4072 GN=T459_29556	3	339.83	-0.95553	0.00044538	89.355	yes	NA	NA	NA	NA	NA	NA
593	ADDIKEEKPSDDAEK	A0A2G2XZL3	Ran-binding protein 1-like protein b OS=Capsicum annuum OX=4072 GN=T459_33209	4	423.201	-1.8001	4.6468e-08	89.484	yes	0.989	1.008	0.942	1.002	1.056	1.002
594	ADDIKEEKPSDDAEK	A0A2G2XZL3	Ran-binding protein 1-like protein b OS=Capsicum annuum OX=4072 GN=T459_33209	4	423.201	-2.7862	0.0005782	48.899	yes	1.144	0.82	1.043	0.869	1.298	0.826
595	ADDISGFHANTHIPVVVGTQMR	A0A2G2YC13	Uncharacterized protein OS=Capsicum annuum OX=4072 GN=T459_31516	4	592.048	-0.64709	3.2195e-16	87.388	yes	1.245	1.262	0.882	0.873	0.85	0.887
596	ADDLEVMLR	A0A2G2ZR45	Uncharacterized protein OS=Capsicum annuum OX=4072 GN=T459_12896	2	531.268	-0.26751	0.010253	71.451	yes	0.974	0.947	1.067	0.973	1.02	1.018
597	ADDVPLHWR	A0A2G2ZKU2	ATP-sulfurylase 3, chloroplastic OS=Capsicum annuum OX=4072 GN=T459_11061	3	370.189	-0.32909	0.0048225	57.59	yes	NA	NA	NA	NA	NA	NA
598	ADDVPLHWR	A0A2G2ZKU2	ATP-sulfurylase 3, chloroplastic OS=Capsicum annuum OX=4072 GN=T459_11061	2	554.78	-1.3147	0.0093836	72.607	yes	NA	NA	NA	NA	NA	NA
599	ADDYLSK	A0A1U8GCL2	Sucrose synthase OS=Capsicum annuum OX=4072 GN=T459_08242	2	406.195	-1.1817	0.028364	79.474	yes	1.025	0.918	0.916	0.986	1.162	0.993
600	ADEATQPDALK	A0A2G2YMK7	Aquaporin TIP1-1 OS=Capsicum annuum OX=4072 GN=T459_26097	3	386.859	0.44758	0.0011327	61.344	yes	NA	NA	NA	NA	NA	NA
601	ADEATQPDALK	A0A2G2YMK7	Aquaporin TIP1-1 OS=Capsicum annuum OX=4072 GN=T459_26097	2	579.785	-1.3952	0.0019956	68.536	yes	0.978	1.044	0.935	0.971	1.032	1.039
602	ADEFTLK	A0A1U8DUR9	Uncharacterized protein OS=Capsicum annuum OX=4072 GN=T459_33662	2	412.213	-0.95167	0.047624	64.265	yes	0.986	0.933	1.014	0.98	1.09	0.997
603	ADEFTLK	A0A1U8DUR9	Uncharacterized protein OS=Capsicum annuum OX=4072 GN=T459_33662	3	275.145	0.63463	0.014268	58.981	yes	1.076	0.907	0.903	0.963	1.127	1.025
604	ADEISDIIR	A0A2G2ZTK6	ATP synthase subunit alpha, chloroplastic OS=Capsicum annuum OX=4072 GN=T459_07399	2	516.272	-1.4981	0.0017525	90.15	yes	1.047	0.939	0.953	1.059	0.965	1.037
605	ADEISDIIR	A0A2G2ZTK6	ATP synthase subunit alpha, chloroplastic OS=Capsicum annuum OX=4072 GN=T459_07399	2	516.272	-1.188	0.0072942	75.387	yes	1.033	0.923	1.035	0.98	1.028	1.002
606	ADEISNIIR	A0A2G2ZTV3	ATP synthase subunit alpha, chloroplastic OS=Capsicum annuum OX=4072 GN=T459_07526	3	344.189	0.86495	0.00022551	106.42	no	0.988	0.955	0.947	0.977	1.057	1.076
607	ADEISNIIR	A0A2G2ZTV3	ATP synthase subunit alpha, chloroplastic OS=Capsicum annuum OX=4072 GN=T459_07526	2	515.78	0.27802	0.0017525	90.15	no	1.058	1.007	1.018	1.027	0.941	0.949
608	ADELMEFYK	A0A2G2YW57	Putative phenylalanine--tRNA ligase beta subunit OS=Capsicum annuum OX=4072 GN=T459_21138	2	573.263	-1.8118	0.046218	47.603	yes	1.082	0.912	0.977	0.923	1.085	1.022
609	ADEPAPIIVEEVK	A0A2G2XYX9	Uncharacterized protein OS=Capsicum annuum OX=4072 GN=T459_33601	2	705.38	-1.4995	1.5931e-05	96.464	yes	NA	NA	NA	NA	NA	NA
610	ADEPAPIIVEEVK	A0A2G2XYX9	Uncharacterized protein OS=Capsicum annuum OX=4072 GN=T459_33601	3	470.589	0.10085	0.00012884	76.073	yes	NA	NA	NA	NA	NA	NA
611	ADEPIPTIAEEVK	A0A2G2XYX9	Uncharacterized protein OS=Capsicum annuum OX=4072 GN=T459_33601	3	471.249	-0.3765	0.00023781	66.989	yes	NA	NA	NA	NA	NA	NA
612	ADEPIPTIAEEVK	A0A2G2XYX9	Uncharacterized protein OS=Capsicum annuum OX=4072 GN=T459_33601	2	706.369	-1.9924	0.00013282	86.944	yes	0.919	0.817	0.955	1.086	1.109	1.114
613	ADESVLSSNLALVR	A0A1U8HHA0	Uncharacterized protein OS=Capsicum annuum OX=4072 GN=T459_18986	2	737.399	-1.4656	0.025441	38.399	yes	NA	NA	NA	NA	NA	NA
614	ADEWNVNK	A0A1U8FK18	Uncharacterized protein OS=Capsicum annuum OX=4072 GN=T459_20342	2	488.23	-1.0286	0.027504	66.27	yes	1.041	0.933	0.977	1.016	1	1.033
615	ADFELLEK	A0A1U8H8G3	Xylose isomerase OS=Capsicum annuum OX=4072 GN=T459_18724	2	482.753	-1.2568	0.0068285	90.15	yes	1.107	1.052	1.028	0.877	1.023	0.913
616	ADFELLEK	A0A1U8H8G3	Xylose isomerase OS=Capsicum annuum OX=4072 GN=T459_18724	3	322.171	-0.049443	0.015354	51.346	yes	NA	NA	NA	NA	NA	NA
617	ADFGSVMDVLK	A0A1U8H4Z2	Threonine synthase, chloroplastic OS=Capsicum annuum OX=4072 GN=T459_17344	3	399.866	0.58309	0.00059703	63.624	no	NA	NA	NA	NA	NA	NA
618	ADFGSVMDVLK	A0A1U8H4Z2	Threonine synthase, chloroplastic OS=Capsicum annuum OX=4072 GN=T459_17344	2	591.297	-1.5306	1.2596e-08	128.85	no	1.013	1.042	1.054	0.965	1.006	0.919
619	ADFGSVMDVLK	A0A1U8H4Z2	Threonine synthase, chloroplastic OS=Capsicum annuum OX=4072 GN=T459_17344	3	394.534	0.48532	0.00015952	79.659	no	1.002	0.83	0.989	0.978	1.134	1.066
620	ADFVVSDVVPVACR	A0A2G3AGT3	L-arabinokinase OS=Capsicum annuum OX=4072 GN=T459_01280	3	511.929	-0.35486	0.00059224	59.294	yes	NA	NA	NA	NA	NA	NA
621	ADGFAGVFPEHK	A0A2G2Z2N6	Plasma membrane ATPase OS=Capsicum annuum OX=4072 GN=T459_19647	3	425.544	0.3576	0.00026855	73.435	no	1.19	1.004	1.054	0.852	0.919	0.982
622	ADGFAGVFPEHK	A0A2G2Z2N6	Plasma membrane ATPase OS=Capsicum annuum OX=4072 GN=T459_19647	4	319.41	0.32068	0.0006384	57.175	no	1.117	0.975	1.153	0.941	1.045	0.77
623	ADGFAGVFPEHK	A0A2G2Z2N6	Plasma membrane ATPase OS=Capsicum annuum OX=4072 GN=T459_19647	2	637.812	-1.5383	0.0025676	63.091	no	0.973	1.023	1.089	0.945	0.937	1.033
624	ADGFVVQTGDPEGPAEGFIDPSTEK	A0A2G3AC46	Peptidyl-prolyl cis-trans isomerase CYP38, chloroplastic OS=Capsicum annuum OX=4072 GN=T459_06871	3	855.066	-1.0286	4.3859e-44	125.39	yes	1.07	0.862	1.016	1.025	1.08	0.948
625	ADGFVVQTGDPEGPAEGFIDPSTEK	A0A2G3AC46	Peptidyl-prolyl cis-trans isomerase CYP38, chloroplastic OS=Capsicum annuum OX=4072 GN=T459_06871	3	855.066	-1.5079	9.4453e-19	78.758	yes	0.98	0.858	0.955	1.065	1.074	1.067
626	ADGGLWLLVR	A0A2G3A4M3	Photosystem II stability/assembly factor, chloroplastic OS=Capsicum annuum OX=4072 GN=T459_04298	2	550.317	-0.61705	0.00080152	85.807	yes	NA	NA	NA	NA	NA	NA
627	ADGGLWLLVR	A0A2G3A4M3	Photosystem II stability/assembly factor, chloroplastic OS=Capsicum annuum OX=4072 GN=T459_04298	3	367.213	0.22952	0.0048736	52.49	yes	NA	NA	NA	NA	NA	NA
628	ADGGLWLLVR	A0A2G3A4M3	Photosystem II stability/assembly factor, chloroplastic OS=Capsicum annuum OX=4072 GN=T459_04298	2	550.317	-0.33536	5.9367e-05	99.788	yes	0.965	0.982	0.967	1.09	0.938	1.058
629	ADGINIINVGK	A0A1U8G5B2	40S ribosomal protein SA OS=Capsicum annuum OX=4072 GN=T459_09985	3	371.88	-0.9472	0.0012362	60.255	yes	0.991	1.003	0.993	0.946	1.146	0.921
630	ADGINIINVGK	A0A1U8G5B2	40S ribosomal protein SA OS=Capsicum annuum OX=4072 GN=T459_09985	2	557.317	-3.0935	0.0022415	67.385	yes	NA	NA	NA	NA	NA	NA
631	ADGMIAHLASLAENR	A0A1U8G303	Magnesium protoporphyrin IX methyltransferase, chloroplastic OS=Capsicum annuum OX=4072 GN=T459_10675	3	528.931	-1.5313	0.0007027	46.89	yes	0.951	0.997	0.947	0.986	1.067	1.051
632	ADGMIAHLASLAENR	A0A1U8G303	Magnesium protoporphyrin IX methyltransferase, chloroplastic OS=Capsicum annuum OX=4072 GN=T459_10675	3	523.6	0.068456	4.4979e-11	108.36	yes	1.103	0.979	1.1	0.965	0.965	0.888
633	ADGNPGMSDEEVLDFVSR	A0A1U8FV49	D-glycerate 3-kinase, chloroplastic OS=Capsicum annuum OX=4072 GN=T459_10897	3	651.955	-1.1519	3.1991e-24	122.49	yes	0.937	0.973	0.998	1.062	1.023	1.006
634	ADGNPGMSDEEVLDFVSR	A0A1U8FV49	D-glycerate 3-kinase, chloroplastic OS=Capsicum annuum OX=4072 GN=T459_10897	2	977.428	-1.3031	1.7091e-10	78.78	yes	0.933	0.916	1.052	0.948	1.069	1.082
635	ADGNPGMSDEEVLDFVSR	A0A1U8FV49	D-glycerate 3-kinase, chloroplastic OS=Capsicum annuum OX=4072 GN=T459_10897	3	646.623	-0.85962	3.4612e-24	124.98	yes	0.991	0.956	0.972	1.1	0.973	1.008
636	ADGSLSSVALDVSGDQVSEEK	A0A2G2ZTE8	Uncharacterized protein OS=Capsicum annuum OX=4072 GN=T459_07348	3	698.334	-1.7426	3.5534e-18	89.859	yes	0.787	0.971	0.929	1.171	0.983	1.16
637	ADGYILEGK	A0A2G2YIY9	40S ribosomal protein S8 OS=Capsicum annuum OX=4072 GN=T459_24665	2	483.251	-1.4363	0.002899	85.355	no	1.062	1.018	1.076	0.947	0.959	0.938
638	ADHQVMTVDSLLTHFK	A0A2G2YEB9	Threonine--tRNA ligase, cytoplasmic OS=Capsicum annuum OX=4072 GN=T459_27590	4	461.236	-0.78831	0.0033304	36.029	yes	0.993	0.989	0.93	1.02	0.985	1.083
639	ADIEPQSLFPFHTHPR	A0A1U8FI09	Germin-like protein subfamily 1 member 7 OS=Capsicum annuum OX=4072 GN=T459_02685	4	473.742	0.29091	0.020747	28.032	yes	NA	NA	NA	NA	NA	NA
640	ADIGIAVADATDAAR	A0A2G2Z2N6	Plasma membrane ATPase OS=Capsicum annuum OX=4072 GN=T459_19647	3	477.248	0.17761	0.00096419	48.216	no	NA	NA	NA	NA	NA	NA
641	ADIGIAVADATDAAR	A0A2G2Z2N6	Plasma membrane ATPase OS=Capsicum annuum OX=4072 GN=T459_19647	2	715.368	-1.1659	1.9006e-07	92.952	no	NA	NA	NA	NA	NA	NA
642	ADIGIAVDDATDAAR	A0A2G3A1L7	Plasma membrane ATPase 1 OS=Capsicum annuum OX=4072 GN=T459_10230	3	491.911	-0.027219	8.0814e-05	63.682	no	0.904	0.952	0.979	1.034	1.068	1.063
643	ADIGIAVDDATDAAR	A0A2G3A1L7	Plasma membrane ATPase 1 OS=Capsicum annuum OX=4072 GN=T459_10230	2	737.363	-0.99813	3.7646e-27	131.61	no	1.084	1.007	0.952	0.973	1.037	0.946
644	ADIGIAVDDATDAAR	A0A2G3A1L7	Plasma membrane ATPase 1 OS=Capsicum annuum OX=4072 GN=T459_10230	2	737.363	-1.4276	0.0010178	56.514	no	1.129	0.873	0.955	0.882	1.105	1.057
645	ADILDSALLR	A0A2G2Z460	ATP-dependent zinc metalloprotease FTSH 8, chloroplastic OS=Capsicum annuum OX=4072 GN=T459_20256	2	543.811	-0.064852	0.0063859	66.056	yes	1.005	1.013	0.991	0.953	1.017	1.022
646	ADILDSALLR	A0A2G2Z460	ATP-dependent zinc metalloprotease FTSH 8, chloroplastic OS=Capsicum annuum OX=4072 GN=T459_20256	2	543.811	-0.46112	0.0063294	66.19	yes	NA	NA	NA	NA	NA	NA
647	ADILDSALLRPGR	A0A2G2Z460	ATP-dependent zinc metalloprotease FTSH 8, chloroplastic OS=Capsicum annuum OX=4072 GN=T459_20256	3	466.268	0.29883	6.8861e-15	136.38	yes	1.135	0.912	1.007	0.995	0.923	1.028
648	ADILDSALLRPGR	A0A2G2Z460	ATP-dependent zinc metalloprotease FTSH 8, chloroplastic OS=Capsicum annuum OX=4072 GN=T459_20256	4	349.953	0.4741	1.2426e-06	98.105	yes	1.092	0.735	1.174	0.984	1.067	0.948
649	ADILGELVSK	A0A1U8G218	Uncharacterized protein OS=Capsicum annuum OX=4072 GN=T459_10891	2	522.8	-1.4376	5.6065e-05	100.93	yes	NA	NA	NA	NA	NA	NA
650	ADILGELVSK	A0A1U8G218	Uncharacterized protein OS=Capsicum annuum OX=4072 GN=T459_10891	3	348.869	0.35824	0.0028578	56.548	yes	1.031	1.046	1.024	0.85	1.045	1.005
651	ADISDTDLNTCK	A0A2G2Z4E1	Uncharacterized protein OS=Capsicum annuum OX=4072 GN=T459_20361	3	451.538	-1.3772	0.00026222	75.819	yes	NA	NA	NA	NA	NA	NA
652	ADISDTDLNTCK	A0A2G2Z4E1	Uncharacterized protein OS=Capsicum annuum OX=4072 GN=T459_20361	2	676.804	-2.447	3.417e-13	125.53	yes	0.873	0.903	0.844	1.069	1.269	1.042
653	ADITSLNK	A0A2G2YVI2	Adenylate kinase 5, chloroplastic OS=Capsicum annuum OX=4072 GN=T459_24499	2	431.237	-0.91598	0.006514	115.71	yes	1.003	0.966	0.9	0.967	1.145	1.019
654	ADITSLNK	A0A2G2YVI2	Adenylate kinase 5, chloroplastic OS=Capsicum annuum OX=4072 GN=T459_24499	3	287.827	0.025499	0.0043254	75.213	yes	0.969	0.939	1.034	0.999	1.027	1.033
655	ADIVITPVIK	A0A1U8GGX4	Uncharacterized protein OS=Capsicum annuum OX=4072 GN=T459_00497	2	534.837	-1.9552	0.002188	77.062	yes	1.043	0.94	0.93	0.953	1.144	0.99
656	ADIVITPVIK	A0A1U8GGX4	Uncharacterized protein OS=Capsicum annuum OX=4072 GN=T459_00497	3	356.894	-0.28536	0.0053925	51.445	yes	0.916	1.086	0.987	1.05	0.912	1.049
657	ADIVLWTIGSK	A0A1U8GPZ1	Alternative NAD(P)H-ubiquinone oxidoreductase C1, chloroplastic/mitochondrial OS=Capsicum annuum OX=4072 GN=T459_11700	2	601.843	-1.5188	0.016397	50.354	yes	1.022	0.983	0.994	1.019	1.04	0.942
658	ADKEVLGHAAK	A0A2G3AJ36	RuBisCO large subunit-binding protein subunit beta, chloroplastic OS=Capsicum annuum OX=4072 GN=T459_02139	4	285.411	-0.66872	0.00021522	74.611	yes	1.095	1.021	0.982	0.875	1.053	0.974
659	ADKEVLGHAAK	A0A2G3AJ36	RuBisCO large subunit-binding protein subunit beta, chloroplastic OS=Capsicum annuum OX=4072 GN=T459_02139	3	380.212	-1.8203	0.00024339	79.492	yes	1.074	0.96	1.015	0.937	1.085	0.928
660	ADKEVLGHAAK	A0A2G3AJ36	RuBisCO large subunit-binding protein subunit beta, chloroplastic OS=Capsicum annuum OX=4072 GN=T459_02139	4	285.411	-1.4803	0.0079574	42.843	yes	NA	NA	NA	NA	NA	NA
661	ADKEVLGHAAK	A0A2G3AJ36	RuBisCO large subunit-binding protein subunit beta, chloroplastic OS=Capsicum annuum OX=4072 GN=T459_02139	3	380.212	-1.7169	1.7432e-07	103.91	yes	0.977	0.931	1.071	1.023	1.114	0.884
662	ADKEVLGHAAK	A0A2G3AJ36	RuBisCO large subunit-binding protein subunit beta, chloroplastic OS=Capsicum annuum OX=4072 GN=T459_02139	4	285.411	0.32394	0.040516	29.544	yes	NA	NA	NA	NA	NA	NA
663	ADLEPALK	A0A2G2YVH0	Signal recognition particle receptor subunit alpha OS=Capsicum annuum OX=4072 GN=T459_24521	2	428.742	-0.043027	0.017692	74.92	yes	0.818	0.816	0.83	1.13	1.206	1.199
664	ADLGIIGFPPR	A0A1U8H521	Protein LOW PSII ACCUMULATION 3, chloroplastic OS=Capsicum annuum OX=4072 GN=T459_17547	2	578.33	-1.3949	0.0010478	75.819	yes	NA	NA	NA	NA	NA	NA
665	ADLGIIGFPPR	A0A1U8H521	Protein LOW PSII ACCUMULATION 3, chloroplastic OS=Capsicum annuum OX=4072 GN=T459_17547	3	385.889	0.44092	0.00080202	64.82	yes	NA	NA	NA	NA	NA	NA
666	ADLGIIGFPPR	A0A1U8H521	Protein LOW PSII ACCUMULATION 3, chloroplastic OS=Capsicum annuum OX=4072 GN=T459_17547	2	578.33	-0.73949	0.0022415	67.385	yes	NA	NA	NA	NA	NA	NA
667	ADLGIIGFPPR	A0A1U8H521	Protein LOW PSII ACCUMULATION 3, chloroplastic OS=Capsicum annuum OX=4072 GN=T459_17547	3	385.889	0.53011	0.00080202	64.82	yes	0.998	0.833	0.999	1.026	1.184	0.96
668	ADLGIIGFPPR	A0A1U8H521	Protein LOW PSII ACCUMULATION 3, chloroplastic OS=Capsicum annuum OX=4072 GN=T459_17547	2	578.33	-0.59309	0.00088611	77.062	yes	NA	NA	NA	NA	NA	NA
669	ADLHHLGMFLQGR	A0A1U8H3Y6	Protein argonaute 1B OS=Capsicum annuum OX=4072 GN=T459_17882	4	374.446	0.14832	5.849e-06	91.961	yes	1.053	1.181	0.708	1.134	0.841	1.083
670	ADLHHLGMFLQGR	A0A1U8H3Y6	Protein argonaute 1B OS=Capsicum annuum OX=4072 GN=T459_17882	4	374.692	-0.0069689	0.0082058	50.354	yes	1.233	0.979	0.727	0.907	1.11	1.044
671	ADLIAYLK	A0A1U8DVD3	Cytochrome c OS=Capsicum annuum OX=4072 GN=T459_32486	2	453.768	-0.77254	0.0069144	99.442	yes	1.049	0.946	1.008	1.038	1.008	0.95
672	ADLIAYLK	A0A1U8DVD3	Cytochrome c OS=Capsicum annuum OX=4072 GN=T459_32486	3	302.848	1.0229	0.022118	45.68	yes	0.927	1.252	0.909	0.967	0.998	0.948
673	ADLLDPDSLAAAIK	A0A1U8GAR2	Uncharacterized protein OS=Capsicum annuum OX=4072 GN=T459_13518	2	706.885	-1.2634	2.1952e-38	175.15	yes	0.994	0.948	0.907	1.061	1.097	0.993
674	ADLLDPDSLAAAIK	A0A1U8GAR2	Uncharacterized protein OS=Capsicum annuum OX=4072 GN=T459_13518	3	471.593	-0.10188	5.5683e-05	75.088	yes	0.983	0.871	1.062	0.959	1.161	0.963
675	ADLLDPDSLAAAIK	A0A1U8GAR2	Uncharacterized protein OS=Capsicum annuum OX=4072 GN=T459_13518	2	706.885	-1.7022	2.1952e-38	175.15	yes	1.07	0.927	1.006	0.986	1.101	0.91
676	ADLNVPLDDAQNITDDTR	A0A2G2Z688	Phosphoglycerate kinase OS=Capsicum annuum OX=4072 GN=T459_21042	3	662.652	-1.2648	0.00032041	50.358	yes	0.926	0.971	0.897	1.01	1.166	1.031
677	ADLNVPLDDAQNITDDTR	A0A2G2Z688	Phosphoglycerate kinase OS=Capsicum annuum OX=4072 GN=T459_21042	3	662.652	-1.4715	7.4087e-12	88.548	yes	0.995	0.883	0.888	1.065	1.052	1.118
678	ADLNVPLDDAQNITDDTR	A0A2G2Z688	Phosphoglycerate kinase OS=Capsicum annuum OX=4072 GN=T459_21042	2	993.474	-1.4134	0.0010924	51.566	yes	1.031	0.781	0.957	1.254	0.999	0.979
679	ADLNVPLDDAQNITDDTR	A0A2G2Z688	Phosphoglycerate kinase OS=Capsicum annuum OX=4072 GN=T459_21042	2	993.474	-0.93191	8.1182e-133	240.82	yes	1.036	0.972	0.902	0.995	1.005	1.089
680	ADLNVPLDDAQNITDDTR	A0A2G2Z688	Phosphoglycerate kinase OS=Capsicum annuum OX=4072 GN=T459_21042	3	662.652	-0.97849	6.8524e-11	81.807	yes	0.743	0.968	1.022	1.193	1.311	0.764
681	ADLNVPLDDAQNITDDTR	A0A2G2Z688	Phosphoglycerate kinase OS=Capsicum annuum OX=4072 GN=T459_21042	3	662.652	-1.1325	0.00024697	52.19	yes	NA	NA	NA	NA	NA	NA
682	ADLNVPLDDAQNITDDTR	A0A2G2Z688	Phosphoglycerate kinase OS=Capsicum annuum OX=4072 GN=T459_21042	2	993.474	-1.7042	7.5656e-14	102.39	yes	1.011	0.949	0.937	0.985	1.12	0.998
683	ADLNVPLDDAQNITDDTR	A0A2G2Z688	Phosphoglycerate kinase OS=Capsicum annuum OX=4072 GN=T459_21042	3	662.652	-1.5488	1.1037e-07	71.376	yes	NA	NA	NA	NA	NA	NA
684	ADLNVPLDDAQNITDDTR	A0A2G2Z688	Phosphoglycerate kinase OS=Capsicum annuum OX=4072 GN=T459_21042	3	662.652	-0.13456	3.8406e-05	58.693	yes	NA	NA	NA	NA	NA	NA
685	ADLPGLK	A0A1U8HBF0	Uncharacterized protein OS=Capsicum annuum OX=4072 GN=T459_18291	3	238.478	0.34193	0.036881	43.124	no	0.407	0.375	0.337	1.568	1.684	1.628
686	ADLSELEEQVK	A0A2G3AJB7	RING-type E3 ubiquitin transferase OS=Capsicum annuum OX=4072 GN=T459_02201	2	630.82	-1.5405	0.0049652	60.255	yes	NA	NA	NA	NA	NA	NA
687	ADLVNNLGTIAR	A0A2G2ZZH4	Heat shock protein 82 OS=Capsicum annuum OX=4072 GN=T459_09482	2	629.344	-0.13278	0.0017552	73.219	no	NA	NA	NA	NA	NA	NA
688	ADLVNNLGTIAR	A0A2G2ZZH4	Heat shock protein 82 OS=Capsicum annuum OX=4072 GN=T459_09482	2	629.344	-0.9775	0.0017518	73.415	no	0.9	0.792	0.871	1.075	1.198	1.164
689	ADLVNNLGTIAR	A0A2G2ZZH4	Heat shock protein 82 OS=Capsicum annuum OX=4072 GN=T459_09482	2	629.344	-0.84194	2.7022e-07	100.73	no	0.707	0.773	0.721	1.273	1.396	1.13
690	ADLVNNLGTIAR	A0A2G2ZZH4	Heat shock protein 82 OS=Capsicum annuum OX=4072 GN=T459_09482	3	419.898	0.46168	0.00032372	79.492	no	1.003	0.705	0.728	1.215	1.299	1.05
691	ADLVNNLGTIAR	A0A2G2ZZH4	Heat shock protein 82 OS=Capsicum annuum OX=4072 GN=T459_09482	2	628.852	-0.95952	0.00027748	86.803	no	0.669	0.711	0.58	1.307	1.39	1.343
692	ADLVNNLGTIAR	A0A2G2ZZH4	Heat shock protein 82 OS=Capsicum annuum OX=4072 GN=T459_09482	3	419.57	0.10337	1.7414e-05	91.961	no	0.339	0.68	1.008	1.351	1.181	1.442
693	ADNIVHDAEFIR	A0A2G2YXU3	Uncharacterized protein OS=Capsicum annuum OX=4072 GN=T459_21857	3	467.237	-0.19386	0.0010696	57.434	yes	NA	NA	NA	NA	NA	NA
694	ADNVWLAAEGVYFPVTESK	A0A1U8FUT4	Stromal cell-derived factor 2-like protein OS=Capsicum annuum OX=4072 GN=T459_10552	3	699.349	-1.4669	1.5635e-06	65.855	yes	0.881	0.836	0.882	1.096	1.18	1.126
695	ADNYAAQR	A0A1U8G3B6	Beta-glucosidase 43 OS=Capsicum annuum OX=4072 GN=T459_10756	2	454.715	-0.67824	0.016138	76.345	yes	0.68	0.696	0.777	1.163	1.484	1.2
696	ADPAIPEDK	A0A2G2YBE3	Uncharacterized protein OS=Capsicum annuum OX=4072 GN=T459_31501	2	478.24	-2.9657	0.010569	71.03	yes	1.023	0.99	1	1.008	1.005	0.975
697	ADPPIYTIQIGIPK	A0A2G2Y8H9	Uncharacterized protein OS=Capsicum annuum OX=4072 GN=T459_30500	3	509.292	-0.50469	5.5989e-05	74.987	yes	1.024	0.931	1.031	0.987	1.033	0.995
698	ADPPIYTIQIGIPK	A0A2G2Y8H9	Uncharacterized protein OS=Capsicum annuum OX=4072 GN=T459_30500	2	763.435	-1.3118	0.013787	43.761	yes	0.985	0.877	1.07	1.105	0.938	1.025
699	ADPYVVLIMK	A0A2G2YVG9	Synaptotagmin-4 OS=Capsicum annuum OX=4072 GN=T459_24552	2	574.823	-1.2852	0.0053322	68.657	yes	1.052	0.923	0.995	1.003	0.979	1.047
700	ADPYVVVTMK	A0A1U8FLX3	Synaptotagmin-4 OS=Capsicum annuum OX=4072 GN=T459_19050	3	374.867	-0.080008	0.002929	56.404	yes	NA	NA	NA	NA	NA	NA
701	ADQAEEIASK	A0A1U8HAK9	Succinate--CoA ligase [ADP-forming] subunit beta, mitochondrial OS=Capsicum annuum OX=4072 GN=T459_18468	2	531.259	-1.9166	3.1195e-05	111.79	yes	NA	NA	NA	NA	NA	NA
702	ADQAILDR	A0A2G2ZCX9	Putative 3,4-dihydroxy-2-butanone kinase OS=Capsicum annuum OX=4072 GN=T459_17891	2	451.241	-2.0629	0.026074	67.334	yes	1.107	1.038	0.934	0.961	1.104	0.856
703	ADQDWNIILLR	A0A1U8G7H2	Bifunctional UDP-glucose 4-epimerase and UDP-xylose 4-epimerase 1 OS=Capsicum annuum OX=4072 GN=T459_00351	2	678.867	-2.1315	0.026653	45.891	yes	0.942	0.862	0.936	1.101	1.061	1.098
704	ADQDWNIILLR	A0A1U8G7H2	Bifunctional UDP-glucose 4-epimerase and UDP-xylose 4-epimerase 1 OS=Capsicum annuum OX=4072 GN=T459_00351	3	452.914	-0.51401	0.00049685	68.536	yes	1.074	0.829	0.891	1.14	0.967	1.098
705	ADQHLPDGK	A0A2G2YPP0	1,4-alpha-glucan-branching enzyme 1, chloroplastic/amyloplastic OS=Capsicum annuum OX=4072 GN=T459_22483	3	327.498	-0.56313	0.035845	35.541	yes	0.861	0.971	0.913	1.066	1.099	1.09
706	ADRDESSPYAAMLAAQDVSQR	A0A2G2YPH6	40S ribosomal protein S14 OS=Capsicum annuum OX=4072 GN=T459_22428	3	766.354	-1.9122	3.8009e-07	66.536	yes	0.975	0.954	0.826	0.999	1.183	1.063
707	ADRDESSPYAAMLAAQDVSQR	A0A2G2YPH6	40S ribosomal protein S14 OS=Capsicum annuum OX=4072 GN=T459_22428	3	766.354	-1.6674	3.8009e-07	66.536	yes	1.137	0.881	0.892	1.051	1.231	0.808
708	ADRDESSPYAAMLAAQDVSQR	A0A2G2YPH6	40S ribosomal protein S14 OS=Capsicum annuum OX=4072 GN=T459_22428	3	761.022	-1.3984	3.7337e-37	136.96	yes	1.063	1.025	0.96	0.917	1.075	0.96
709	ADRDESSPYAAMLAAQDVSQR	A0A2G2YPH6	40S ribosomal protein S14 OS=Capsicum annuum OX=4072 GN=T459_22428	4	571.018	-0.31644	3.2168e-10	75.773	yes	NA	NA	NA	NA	NA	NA
710	ADRVEGGYVLNGNK	A0A2G2YHX5	Isovaleryl-CoA dehydrogenase, mitochondrial OS=Capsicum annuum OX=4072 GN=T459_28796	3	498.251	-0.86677	0.0062065	44.511	yes	NA	NA	NA	NA	NA	NA
711	ADSPPYGIDYPTHRPTGR	A0A1U8H273	GDSL esterase/lipase OS=Capsicum annuum OX=4072 GN=T459_18454	4	500.746	-0.49609	6.1968e-11	79.837	no	NA	NA	NA	NA	NA	NA
712	ADSQVFLFVNSK	A0A2G2YPH5	60S ribosomal protein L24 OS=Capsicum annuum OX=4072 GN=T459_22451	3	452.238	-1.7021	0.00027049	72.705	no	0.967	0.965	0.994	0.954	1.08	1.04
713	ADSQVFLFVNSK	A0A2G2YPH5	60S ribosomal protein L24 OS=Capsicum annuum OX=4072 GN=T459_22451	2	677.854	-2.4188	3.8766e-05	95.264	no	NA	NA	NA	NA	NA	NA
714	ADSVDYDVK	A0A1U8G5S4	Pathogenesis-related protein STH-21 OS=Capsicum annuum OX=4072 GN=T459_07760	2	506.235	-2.4277	0.0011404	102.52	yes	0.932	0.896	0.794	1.128	1.139	1.111
715	ADSVDYDVK	A0A1U8G5S4	Pathogenesis-related protein STH-21 OS=Capsicum annuum OX=4072 GN=T459_07760	3	337.826	-0.22229	0.023607	40.724	yes	NA	NA	NA	NA	NA	NA
716	ADTCASVVDTLSSPSSALK	A0A1U8GNB7	Dolichyl-diphosphooligosaccharide--protein glycosyltransferase subunit 2 OS=Capsicum annuum OX=4072 GN=T459_14882	3	636.979	-1.8772	4.5191e-17	90.385	yes	NA	NA	NA	NA	NA	NA
717	ADTLLPEYFK	A0A2G3A7P9	Uncharacterized protein OS=Capsicum annuum OX=4072 GN=T459_05388	2	598.814	-1.2257	0.00017422	96.113	yes	NA	NA	NA	NA	NA	NA
718	ADTLLPEYFK	A0A2G3A7P9	Uncharacterized protein OS=Capsicum annuum OX=4072 GN=T459_05388	3	399.545	0.35394	0.0064579	49.3	yes	NA	NA	NA	NA	NA	NA
719	ADTNYSLTIR	A0A2G3ALX3	Uncharacterized protein (Fragment) OS=Capsicum annuum OX=4072 GN=T459_03119	2	577.296	-1.5116	3.464e-05	108.35	yes	1.037	0.926	0.968	0.944	1.076	1.05
720	ADTNYSLTIR	A0A2G3ALX3	Uncharacterized protein (Fragment) OS=Capsicum annuum OX=4072 GN=T459_03119	3	385.2	-0.26672	0.019869	39.625	yes	1.059	1.014	0.985	1.052	0.917	0.973
721	ADTNYSLTIR	A0A2G3ALX3	Uncharacterized protein (Fragment) OS=Capsicum annuum OX=4072 GN=T459_03119	2	577.788	-1.1259	0.014038	60.691	yes	NA	NA	NA	NA	NA	NA
722	ADTNYSLTIR	A0A2G3ALX3	Uncharacterized protein (Fragment) OS=Capsicum annuum OX=4072 GN=T459_03119	2	577.788		2.384e-05	79.23	yes	NA	NA	NA	NA	NA	NA
723	ADTSIDYADIPVAQIR	A0A1U8HER3	Acetyltransferase component of pyruvate dehydrogenase complex OS=Capsicum annuum OX=4072 GN=T459_18710	3	583.3	-0.975	0.0011375	46.318	yes	0.862	0.722	0.979	1.144	1.119	1.173
724	ADTSIDYADIPVAQIR	A0A1U8HER3	Acetyltransferase component of pyruvate dehydrogenase complex OS=Capsicum annuum OX=4072 GN=T459_18710	2	874.447	-1.435	0.00038694	60.549	yes	0.989	0.924	0.93	1.039	1.023	1.094
725	ADTTSNGHPLFSCR	A0A1U8G6J2	Protein yippee-like OS=Capsicum annuum OX=4072 GN=T459_09655	3	535.904	-1.267	0.0010096	61.409	yes	0.987	0.929	0.921	0.963	1.172	1.029
726	ADVAEVCIQALQYEEAK	A0A2G2XVY2	Sanguinarine reductase OS=Capsicum annuum OX=4072 GN=T459_34518	3	646.316	-1.1158	1.2469e-31	138.91	yes	0.964	1.028	0.922	1.02	1.105	0.961
727	ADVAEVCIQALQYEEAK	A0A2G2XVY2	Sanguinarine reductase OS=Capsicum annuum OX=4072 GN=T459_34518	2	968.97	-0.62209	3.5102e-23	124.29	yes	0.915	1.098	0.881	0.993	1.061	1.052
728	ADVAEVCIQALQYEEAK	A0A2G2XVY2	Sanguinarine reductase OS=Capsicum annuum OX=4072 GN=T459_34518	4	484.988	0.31098	4.8972e-12	91.355	yes	1.119	0.957	1.003	0.941	0.941	1.041
729	ADVSATIPAIAQPLSEEPTEIASNIK	A0A1U8E418	Alpha-1,4 glucan phosphorylase OS=Capsicum annuum OX=4072 GN=T459_23272	4	667.104	-0.96573	4.1765e-14	73.831	yes	0.863	0.909	0.902	1.089	1.113	1.124
730	ADVVIPVPTVSAVHAR	A0A1U8H449	Uncharacterized protein OS=Capsicum annuum OX=4072 GN=T459_01822	3	544.314	-0.48082	2.1092e-06	73.833	yes	0.947	0.971	0.818	1.15	0.977	1.136
731	ADWEEYDATCLVSK	A0A2G2ZFA7	S-formylglutathione hydrolase OS=Capsicum annuum OX=4072 GN=T459_13695	2	843.869	-1.1734	7.5643e-13	118.21	yes	0.919	0.919	0.948	1.003	1.091	1.12
732	ADWEEYDATCLVSK	A0A2G2ZFA7	S-formylglutathione hydrolase OS=Capsicum annuum OX=4072 GN=T459_13695	3	562.915	-1.5485	0.0017235	47.774	yes	0.933	0.93	1.081	1.025	1.059	0.973
733	ADWEPTLDWDK	A0A2G2YMX2	GDSL esterase/lipase CPRD49 OS=Capsicum annuum OX=4072 GN=T459_26217	3	459.21	-0.23556	0.00026089	75.819	no	1.059	1.073	1.028	0.899	0.96	0.981
734	ADWEPTLDWDK	A0A2G2YMX2	GDSL esterase/lipase CPRD49 OS=Capsicum annuum OX=4072 GN=T459_26217	2	688.312	-1.2331	0.0053688	59.198	no	1.054	0.9	1.086	0.886	1.044	1.03
735	ADYDFGHTSDAK	A0A1U8GVQ2	Protein disulfide-isomerase OS=Capsicum annuum OX=4072 GN=T459_16875	3	442.858	-1.4374	0.00027479	71.085	yes	0.906	0.948	1.037	0.984	0.981	1.145
736	ADYDFGHTSDAK	A0A1U8GVQ2	Protein disulfide-isomerase OS=Capsicum annuum OX=4072 GN=T459_16875	2	663.783		0.021168	40.475	yes	NA	NA	NA	NA	NA	NA
737	ADYDFGHTSDAK	A0A1U8GVQ2	Protein disulfide-isomerase OS=Capsicum annuum OX=4072 GN=T459_16875	3	442.858	-1.7441	0.0023961	52.495	yes	0.986	0.921	0.853	1.056	1.166	1.018
738	ADYFLVGK	A0A2G2YDS4	Alpha-1,4 glucan phosphorylase OS=Capsicum annuum OX=4072 GN=T459_27188	2	456.745	-1.3483	0.0069144	99.442	yes	NA	NA	NA	NA	NA	NA
739	ADYFLVGK	A0A2G2YDS4	Alpha-1,4 glucan phosphorylase OS=Capsicum annuum OX=4072 GN=T459_27188	3	304.832	0.64758	0.026573	43.808	yes	NA	NA	NA	NA	NA	NA
740	ADYFLVGMDFPSYIECQEK	A0A1U8GFE1	Alpha-1,4 glucan phosphorylase OS=Capsicum annuum OX=4072 GN=T459_12102	3	771.347	-1.328	0.0055735	35.133	yes	1.218	1.001	0.847	0.799	1.046	1.089
741	ADYHDVVR	A0A2G2XY41	Uncharacterized protein OS=Capsicum annuum OX=4072 GN=T459_33759	3	325.495	-0.6875	0.052276	34.781	yes	NA	NA	NA	NA	NA	NA
742	ADYKEPLYDVK	A0A1U8DZI7	Methylcrotonoyl-CoA carboxylase beta chain, mitochondrial OS=Capsicum annuum OX=4072 GN=T459_33045	3	447.563	-1.273	0.0015943	62.088	yes	1.016	0.929	0.989	1.033	1.109	0.924
743	ADYKEPLYDVK	A0A1U8DZI7	Methylcrotonoyl-CoA carboxylase beta chain, mitochondrial OS=Capsicum annuum OX=4072 GN=T459_33045	4	335.924	0.27179	0.040516	29.544	yes	NA	NA	NA	NA	NA	NA
744	ADYLAAEK	A0A1U8E5E4	Thioredoxin-like protein AAED1, chloroplastic OS=Capsicum annuum OX=4072 GN=T459_22823	2	440.724	-1.3697	0.0068285	90.15	yes	1.11	0.966	1.032	0.904	1.041	0.947
745	ADYLAAEK	A0A1U8E5E4	Thioredoxin-like protein AAED1, chloroplastic OS=Capsicum annuum OX=4072 GN=T459_22823	3	294.152		0.01713	41.876	yes	NA	NA	NA	NA	NA	NA
746	AEAALAEALK	A0A2G2YEB9	Threonine--tRNA ligase, cytoplasmic OS=Capsicum annuum OX=4072 GN=T459_27590	2	493.779	-2.5415	3.2638e-06	137.89	yes	1.093	0.954	0.986	0.966	1.037	0.962
749	AEAFDCPISYYTR	A0A1U8FU65	Uncharacterized protein OS=Capsicum annuum OX=4072 GN=T459_10919	2	796.856	-1.5523	1.1569e-07	101.3	yes	0.959	0.949	0.953	1.02	1.109	1.011
750	AEAFDCPISYYTR	A0A1U8FU65	Uncharacterized protein OS=Capsicum annuum OX=4072 GN=T459_10919	3	531.573	-0.63436	0.012397	35.657	yes	NA	NA	NA	NA	NA	NA
751	AEAHFCADQTR	A0A2G2ZYI2	Acid beta-fructofuranosidase OS=Capsicum annuum OX=4072 GN=T459_09149	3	435.86	-1.1793	0.00071883	65.695	yes	0.938	1.168	1.109	0.833	0.926	1.026
752	AEAHLYTIIK	A0A2G2XX24	Ubiquitin carboxyl-terminal hydrolase 12 OS=Capsicum annuum OX=4072 GN=T459_34146	3	386.889	-1.1494	0.013586	43.297	no	NA	NA	NA	NA	NA	NA
753	AEAIYAESK	A0A2G3A6M1	CSC1-like protein ERD4 OS=Capsicum annuum OX=4072 GN=T459_05000	2	491.248	-1.9807	0.0016884	91.549	yes	1.134	1.048	1.085	0.86	0.921	0.951
754	AEALTNSHR	A0A1U8G8J3	Protein phosphatase 2C 57 OS=Capsicum annuum OX=4072 GN=T459_09638	3	333.505	-0.066157	0.016712	44.318	yes	1.145	0.807	0.926	1.099	1.237	0.786
755	AEALTNSHRPYGNNK	A0A1U8G8J3	Protein phosphatase 2C 57 OS=Capsicum annuum OX=4072 GN=T459_09638	4	418.956	-0.070731	2.8466e-10	105.03	yes	NA	NA	NA	NA	NA	NA
756	AEALTNSHRPYGNNK	A0A1U8G8J3	Protein phosphatase 2C 57 OS=Capsicum annuum OX=4072 GN=T459_09638	4	418.956	-0.6258	1.1423e-05	72.891	yes	NA	NA	NA	NA	NA	NA
757	AEALTNSHRPYGNNK	A0A1U8G8J3	Protein phosphatase 2C 57 OS=Capsicum annuum OX=4072 GN=T459_09638	4	419.202	-1.0883	0.0027509	41.621	yes	NA	NA	NA	NA	NA	NA
758	AEAQIGVDVHSALNAALTG	A0A1U8GQC6	ATP synthase subunit delta', mitochondrial OS=Capsicum annuum OX=4072 GN=T459_15156	3	612.987	-0.46577	7.3316e-06	58.693	yes	NA	NA	NA	NA	NA	NA
759	AEASKPSLTPEEIK	A0A1U8EUV4	Uncharacterized protein OS=Capsicum annuum OX=4072 GN=T459_31277	3	500.603	-2.0982	0.00061005	62.357	yes	NA	NA	NA	NA	NA	NA
760	AEATDVANAVLDGSDAILLGAETLR	A0A2G2Y675	Pyruvate kinase OS=Capsicum annuum OX=4072 GN=T459_29653	3	829.426	-1.4225	6.4396e-06	49.266	yes	NA	NA	NA	NA	NA	NA
761	AEATDVANAVLDGTDCVMLSGESAAGAYPELAVK	A0A1U8FFF7	Pyruvate kinase OS=Capsicum annuum OX=4072 GN=T459_04473	4	849.655	-1.1321	0.015316	20.126	no	NA	NA	NA	NA	NA	NA
762	AEATPAAAESVQCFGR	A0A1U8DZA9	40S ribosomal protein S16 OS=Capsicum annuum OX=4072 GN=T459_02663	2	832.888	-2.2534	7.9907e-55	184.48	yes	0.934	1.017	0.994	1.025	0.994	1.037
763	AEATPAAAESVQCFGR	A0A1U8DZA9	40S ribosomal protein S16 OS=Capsicum annuum OX=4072 GN=T459_02663	3	555.595	-1.447	3.2931e-06	71.08	yes	NA	NA	NA	NA	NA	NA
764	AEATPAAAESVQCFGR	A0A1U8DZA9	40S ribosomal protein S16 OS=Capsicum annuum OX=4072 GN=T459_02663	3	555.595	-1.8945	2.5115e-06	72.898	yes	NA	NA	NA	NA	NA	NA
765	AEATPAAAESVQCFGR	A0A1U8DZA9	40S ribosomal protein S16 OS=Capsicum annuum OX=4072 GN=T459_02663	2	832.888	-2.2392	4.9902e-39	164.63	yes	0.98	1.014	0.995	0.978	0.998	1.035
766	AEAVGSSSGR	B1PDK0	Peptidyl-prolyl cis-trans isomerase OS=Capsicum annuum OX=4072 GN=T459_32100	2	460.725	-0.5503	0.0073807	63.694	yes	0.861	0.939	0.862	0.993	1.21	1.134
767	AEAVHSAIDDVGPDCPTLPAK	A0A1U8EUW4	Putative 6-phosphogluconolactonase 1 OS=Capsicum annuum OX=4072 GN=T459_27127	3	721.684	-0.43523	6.2729e-05	50.358	yes	NA	NA	NA	NA	NA	NA
768	AECCNLDPAEQCTK	A0A2G2YEM0	Carbonic anhydrase OS=Capsicum annuum OX=4072 GN=T459_27674	3	565.897	-1.4224	3.1865e-06	94.09	yes	1.127	1.001	1.007	0.863	0.985	1.017
769	AEDDYDYLFK	A0A2G3A7R3	Ras-related protein RABA1d OS=Capsicum annuum OX=4072 GN=T459_05387	2	639.78	-0.98044	0.00011738	97.734	no	0.999	0.85	0.937	1.038	1.191	0.985
770	AEDDYDYLFK	A0A2G3A7R3	Ras-related protein RABA1d OS=Capsicum annuum OX=4072 GN=T459_05387	3	426.856	-0.079327	0.0022347	59.908	no	NA	NA	NA	NA	NA	NA
771	AEDGEIWNFTVR	A0A1U8GCZ8	Pyruvate kinase OS=Capsicum annuum OX=4072 GN=T459_07887	2	718.844	-1.2851	7.9601e-09	109.44	yes	1.041	1.051	0.965	0.951	1.03	0.962
772	AEDGEIWNFTVR	A0A1U8GCZ8	Pyruvate kinase OS=Capsicum annuum OX=4072 GN=T459_07887	3	479.565	0.29148	1.0053e-05	95.094	yes	1.102	1.013	0.875	1.024	0.978	1.008
773	AEDGPCGAITR	A0A2G2XYW8	Uncharacterized protein OS=Capsicum annuum OX=4072 GN=T459_33474	2	573.764	-1.6582	0.0010519	75.788	yes	NA	NA	NA	NA	NA	NA
774	AEDGYNWR	A0A1U8EFD1	Uncharacterized protein OS=Capsicum annuum OX=4072 GN=T459_23511	2	505.72	-1.1136	0.02535	67.897	yes	0.443	0.41	0.425	1.484	1.622	1.617
775	AEDKPGFLK	A0A2G2YYH2	Rhodanese-like domain-containing protein 4, chloroplastic OS=Capsicum annuum OX=4072 GN=T459_21968	4	251.891	-1.4613	0.003201	59.908	yes	NA	NA	NA	NA	NA	NA
776	AEDKTEWSYYK	A0A2G2ZFP8	GLABRA2 expression modulator OS=Capsicum annuum OX=4072 GN=T459_13746	3	473.886	-2.4104	0.0056087	51.286	yes	NA	NA	NA	NA	NA	NA
777	AEDLDLPEFDIVDK	A0A2G2YIQ9	Uncharacterized protein OS=Capsicum annuum OX=4072 GN=T459_24699	3	540.266	-0.39754	0.00041056	62.287	yes	1.056	0.866	0.953	1.107	1.111	0.907
778	AEDLDLPEFDIVDK	A0A2G2YIQ9	Uncharacterized protein OS=Capsicum annuum OX=4072 GN=T459_24699	2	809.896	-0.61435	0.00029861	68.972	yes	1.039	0.881	1.091	0.978	1.094	0.918
779	AEDSFTHR	A0A2G2XVE4	Aspartate--tRNA ligase, cytoplasmic OS=Capsicum annuum OX=4072 GN=T459_34866	3	321.482	-0.38786	0.001385	105.14	yes	NA	NA	NA	NA	NA	NA
780	AEDSKPLAVPTSAGS	A0A1U8E0S1	26S proteasome non-ATPase regulatory subunit 7 OS=Capsicum annuum OX=4072 GN=T459_21134	2	715.362	-2.1588	3.7558e-05	86.214	yes	0.957	0.98	1.02	1.009	1.083	0.95
781	AEDSKPLAVPTSAGS	A0A1U8E0S1	26S proteasome non-ATPase regulatory subunit 7 OS=Capsicum annuum OX=4072 GN=T459_21134	3	477.244	-1.0382	0.044084	29.618	yes	1.047	0.848	0.934	0.944	1.139	1.089
782	AEDSVDKFLDEAK	A0A1U8EKC1	Uncharacterized protein OS=Capsicum annuum OX=4072 GN=T459_26857	3	489.572	-1.3567	0.0028053	52.576	yes	NA	NA	NA	NA	NA	NA
783	AEEAIKENEIR	A0A2G2ZTW2	Uncharacterized protein OS=Capsicum annuum OX=4072 GN=T459_07521	3	434.561	-0.91325	0.0011528	65.179	yes	1.04	0.947	0.962	0.992	1.071	0.988
784	AEEAYVALDLNK	A0A2G2Y2G5	Putative zinc metalloprotease EGY3, chloroplastic OS=Capsicum annuum OX=4072 GN=T459_32254	3	445.898	-0.32566	0.00017617	81.92	yes	NA	NA	NA	NA	NA	NA
785	AEEAYVALDLNK	A0A2G2Y2G5	Putative zinc metalloprotease EGY3, chloroplastic OS=Capsicum annuum OX=4072 GN=T459_32254	2	668.343	-1.763	1.2741e-07	102.87	yes	0.959	0.931	0.886	1.077	1.098	1.05
786	AEEDGVACVEFIAGK	A0A1U8GZI9	Dihydrolipoyl dehydrogenase OS=Capsicum annuum OX=4072 GN=T459_15259	2	797.875	-0.70146	3.5843e-27	132.08	no	1.003	0.977	1.006	0.995	1.049	0.97
787	AEEDGVACVEFIAGK	A0A1U8GZI9	Dihydrolipoyl dehydrogenase OS=Capsicum annuum OX=4072 GN=T459_15259	4	399.441	0.60201	0.001963	41.621	no	NA	NA	NA	NA	NA	NA
788	AEEDGVACVEFIAGK	A0A1U8GZI9	Dihydrolipoyl dehydrogenase OS=Capsicum annuum OX=4072 GN=T459_15259	3	532.252	-0.35001	8.6567e-06	69.92	no	0.821	1.056	0.876	0.964	1.17	1.113
789	AEEEFAK	A0A2G2XZ82	Adenosylhomocysteinase OS=Capsicum annuum OX=4072 GN=T459_33381	2	412.195	-1.285	0.025417	81.784	yes	1.029	1.062	0.968	0.941	1.05	0.95
790	AEEEFAK	A0A2G2XZ82	Adenosylhomocysteinase OS=Capsicum annuum OX=4072 GN=T459_33381	3	275.133	-0.022318	0.011611	64.803	yes	NA	NA	NA	NA	NA	NA
791	AEEETGSWK	A0A1U8ESC0	Malate dehydrogenase [NADP], chloroplastic OS=Capsicum annuum OX=4072 GN=T459_31834	2	518.733	-1.2309	0.00056184	127.76	yes	1.082	0.998	1.095	0.947	0.985	0.893
792	AEEETGSWK	A0A1U8ESC0	Malate dehydrogenase [NADP], chloroplastic OS=Capsicum annuum OX=4072 GN=T459_31834	3	346.158		0.0023727	58.433	yes	NA	NA	NA	NA	NA	NA
793	AEEGREDVHVVSLAK	A0A2G2ZTE8	Uncharacterized protein OS=Capsicum annuum OX=4072 GN=T459_07348	4	410.467	-0.18129	0.00042674	52.527	yes	NA	NA	NA	NA	NA	NA
794	AEEGSFSVPLRDEFLENAR	A0A2G2YNY0	Eukaryotic translation initiation factor 3 subunit E OS=Capsicum annuum OX=4072 GN=T459_26518	3	723.015	-1.6974	1.5041e-05	58.688	yes	0.983	0.913	0.904	1.079	1.073	1.048
795	AEEGSFSVPLRDEFLENAR	A0A2G2YNY0	Eukaryotic translation initiation factor 3 subunit E OS=Capsicum annuum OX=4072 GN=T459_26518	3	722.687	-1.6063	3.4412e-17	94.838	yes	NA	NA	NA	NA	NA	NA
796	AEEHLPNTLR	A0A1U8E8C4	Glutamate--tRNA ligase, chloroplastic/mitochondrial OS=Capsicum annuum OX=4072 GN=T459_34417	3	393.875	-0.69132	0.0045587	53.124	yes	1.02	0.998	0.883	0.949	1.062	1.088
797	AEEIKEELER	A0A1U8GDM7	Chaperone protein dnaJ 13 OS=Capsicum annuum OX=4072 GN=T459_00589	3	415.882	0.86237	0.043128	35.652	yes	0.958	0.887	0.928	1.052	1.21	0.964
798	AEEILNNTPDAYILQQFDNPANPK	A0A2G3AN00	Cysteine synthase OS=Capsicum annuum OX=4072 GN=T459_03488	3	905.78	-1.0835	2.1236e-39	119.38	yes	0.959	1.081	1.104	0.933	1.058	0.865
799	AEEILNNTPDAYILQQFDNPANPK	A0A2G3AN00	Cysteine synthase OS=Capsicum annuum OX=4072 GN=T459_03488	4	679.833	-0.60878	8.0769e-19	79.69	yes	0.931	0.992	1.06	1.003	0.998	1.016
800	AEEIMGQAIR	A0A1U8F694	Putative voltage-gated potassium channel subunit beta OS=Capsicum annuum OX=4072 GN=T459_31261	2	567.285	-2.1977	0.027086	42.348	yes	0.95	0.977	0.864	1.026	1.202	0.98
801	AEEIMGQAIR	A0A1U8F694	Putative voltage-gated potassium channel subunit beta OS=Capsicum annuum OX=4072 GN=T459_31261	2	559.287	-1.3091	0.00077603	86.014	yes	1.043	1.022	0.932	1.013	1.02	0.971
802	AEEIMGQAIR	A0A1U8F694	Putative voltage-gated potassium channel subunit beta OS=Capsicum annuum OX=4072 GN=T459_31261	3	373.194	0.32698	0.0020384	61.78	yes	1.023	0.874	0.963	0.992	1.038	1.109
803	AEELAAK	A0A2G2ZVE1	Remorin OS=Capsicum annuum OX=4072 GN=T459_08060	2	366.2	0.24052	0.021044	85.212	yes	0.977	0.847	0.833	1.069	1.189	1.086
804	AEELGFTLSSIEK	A0A1U8G6D5	Uncharacterized protein OS=Capsicum annuum OX=4072 GN=T459_10250	3	475.249	-0.26477	5.3493e-05	84.892	yes	NA	NA	NA	NA	NA	NA
805	AEELGFTLSSIEK	A0A1U8G6D5	Uncharacterized protein OS=Capsicum annuum OX=4072 GN=T459_10250	2	712.369	-1.4424	3.5088e-53	202.13	yes	0.977	0.958	0.974	0.964	1.091	1.035
806	AEELGFTLSSIEK	A0A1U8G6D5	Uncharacterized protein OS=Capsicum annuum OX=4072 GN=T459_10250	4	356.688	0.68649	0.041406	23.092	yes	NA	NA	NA	NA	NA	NA
807	AEELHLILR	A0A2G2ZVQ1	Uncharacterized protein OS=Capsicum annuum OX=4072 GN=T459_08159	3	365.217	0.20861	0.011507	47.603	yes	NA	NA	NA	NA	NA	NA
808	AEELLEK	A0A2G3AAX1	Organellar oligopeptidase A, chloroplastic/mitochondrial OS=Capsicum annuum OX=4072 GN=T459_06525	3	277.82	0.015347	0.025104	47.849	yes	1.273	0.816	1.15	0.908	0.921	0.932
809	AEEMAQTFR	A0A1U8ESA9	30S ribosomal protein S1, chloroplastic OS=Capsicum annuum OX=4072 GN=T459_31408	2	549.748	-1.9763	0.0085998	57.55	yes	1.133	0.974	1.089	0.899	0.998	0.907
810	AEEMAQTFR	A0A1U8ESA9	30S ribosomal protein S1, chloroplastic OS=Capsicum annuum OX=4072 GN=T459_31408	3	366.834	-0.81691	0.0030586	58.433	yes	NA	NA	NA	NA	NA	NA
811	AEENPDFFNWNR	A0A1U8DXH7	Pectin acetylesterase OS=Capsicum annuum OX=4072 GN=T459_33597	2	769.837	-0.97331	1.4646e-13	133.32	yes	1.013	0.969	0.992	0.961	1.02	1.045
812	AEENPDFFNWNR	A0A1U8DXH7	Pectin acetylesterase OS=Capsicum annuum OX=4072 GN=T459_33597	3	513.56	0.082378	6.6725e-05	86.911	yes	1.006	1.027	1	0.928	1.044	0.995
813	AEEPINEQAIANIYSAMR	A0A2G2Z6G8	Putative prefoldin subunit 2 OS=Capsicum annuum OX=4072 GN=T459_15654	3	673.998	-1.0284	1.7882e-12	95.554	yes	NA	NA	NA	NA	NA	NA
814	AEESFGNYHPK	A0A2G2YR03	Uncharacterized protein OS=Capsicum annuum OX=4072 GN=T459_22954	3	426.863	0.024128	0.0158	39.625	yes	NA	NA	NA	NA	NA	NA
815	AEETAESGGLK	A0A2G3A2T4	Calnexin-like protein OS=Capsicum annuum OX=4072 GN=T459_10651	3	364.512	-0.34963	0.00096814	63.073	yes	0.974	0.954	0.984	0.946	1.077	1.065
816	AEETAESGGLK	A0A2G3A2T4	Calnexin-like protein OS=Capsicum annuum OX=4072 GN=T459_10651	2	546.264	-2.3419	2.5417e-09	138.45	yes	0.913	0.886	0.867	1.104	1.126	1.105
817	AEETAESGGLKR	A0A2G3A2T4	Calnexin-like protein OS=Capsicum annuum OX=4072 GN=T459_10651	3	416.546	-0.62303	0.00016338	82.85	yes	0.915	0.828	0.876	1.128	1.136	1.117
818	AEEVSGSQPAEVHNLVQGK	A0A1U8H4D5	Delta-1-pyrroline-5-carboxylate dehydrogenase 12A1, mitochondrial OS=Capsicum annuum OX=4072 GN=T459_17725	3	660.332	-2.6856	1.1638e-28	122.87	yes	1	1.014	1.01	1.006	1.029	0.942
819	AEEYFAK	A0A2G2YCB4	50S ribosomal protein L15 OS=Capsicum annuum OX=4072 GN=T459_26836	3	286.473	0.44038	0.02177	50.966	yes	NA	NA	NA	NA	NA	NA
820	AEEYFAK	A0A2G2YCB4	50S ribosomal protein L15 OS=Capsicum annuum OX=4072 GN=T459_26836	2	429.206	-1.4086	0.019026	86.794	yes	1.172	1.017	1.113	0.9	0.986	0.813
821	AEEYHQQYLAK	A0A1U8G894	Peptide methionine sulfoxide reductase OS=Capsicum annuum OX=4072 GN=T459_08714	3	460.558	-1.5507	0.00022062	77.062	no	1.078	0.928	1.028	0.895	1.089	0.982
822	AEEYHQQYLAK	A0A1U8G894	Peptide methionine sulfoxide reductase OS=Capsicum annuum OX=4072 GN=T459_08714	3	460.558	-1.3362	0.0012036	60.598	no	0.959	0.972	0.963	1.084	0.973	1.05
823	AEEYHQQYLAK	A0A1U8G894	Peptide methionine sulfoxide reductase OS=Capsicum annuum OX=4072 GN=T459_08714	4	345.67	-0.21446	9.2403e-05	79.659	no	NA	NA	NA	NA	NA	NA
824	AEEYHQQYLAK	A0A1U8G894	Peptide methionine sulfoxide reductase OS=Capsicum annuum OX=4072 GN=T459_08714	2	690.333	-2.0689	5.4623e-11	142.08	no	1.084	0.952	0.986	0.999	1.074	0.905
825	AEEYHQQYLAK	A0A1U8G894	Peptide methionine sulfoxide reductase OS=Capsicum annuum OX=4072 GN=T459_08714	3	460.558	-1.1717	0.00041891	70.942	no	1.022	0.948	1.045	0.946	1.007	1.034
826	AEEYHQQYLEK	A0A2G2ZW11	Peptide methionine sulfoxide reductase A1 OS=Capsicum annuum OX=4072 GN=T459_08269	3	479.893	-1.0908	0.00010484	83.182	yes	NA	NA	NA	NA	NA	NA
827	AEEYLNDLTK	A0A1U8EKC1	Uncharacterized protein OS=Capsicum annuum OX=4072 GN=T459_26857	2	598.296	-1.7357	0.029926	47.302	yes	0.986	0.917	0.959	1.027	1.134	0.976
828	AEFDESGPSIVHR	A0A1U8E731	Actin OS=Capsicum annuum OX=4072 GN=T459_25669	3	481.9	-0.71945	1.2487e-15	140.14	yes	0.88	0.995	1.236	0.779	1.051	1.059
829	AEFDESGPSIVHR	A0A1U8E731	Actin OS=Capsicum annuum OX=4072 GN=T459_25669	2	722.347	-2.0669	2.635e-08	107.93	yes	NA	NA	NA	NA	NA	NA
830	AEFDESGPSIVHR	A0A1U8E731	Actin OS=Capsicum annuum OX=4072 GN=T459_25669	3	481.9	0.17176	1.7758e-08	104.59	yes	NA	NA	NA	NA	NA	NA
831	AEFDESGPSIVHR	A0A1U8E731	Actin OS=Capsicum annuum OX=4072 GN=T459_25669	3	481.9	-0.32045	0.028418	31.664	yes	NA	NA	NA	NA	NA	NA
832	AEFDESGPSIVHR	A0A1U8E731	Actin OS=Capsicum annuum OX=4072 GN=T459_25669	3	481.9	-0.096747	0.0058325	42.426	yes	NA	NA	NA	NA	NA	NA
833	AEFDVDEMK	A0A1U8GN34	Acyl-coenzyme A oxidase OS=Capsicum annuum OX=4072 GN=T459_00658	2	542.237	-2.9366	0.0013183	99.568	yes	0.961	1.003	0.934	0.998	1.018	1.086
834	AEFEEVNK	A0A2G2ZVG7	Heat shock 70 kDa protein 8 OS=Capsicum annuum OX=4072 GN=T459_08079	2	483.232	-0.48403	0.013206	79.474	yes	NA	NA	NA	NA	NA	NA
835	AEFPALFVPYK	A0A2G3A192	Uncharacterized protein OS=Capsicum annuum OX=4072 GN=T459_10084	3	427.901	-0.052512	0.00080202	64.82	yes	0.88	0.872	0.855	1.046	1.149	1.199
836	AEFPFEVIPK	A0A1U8E9W4	Acyl-coenzyme A oxidase 4, peroxisomal OS=Capsicum annuum OX=4072 GN=T459_25881	3	392.881	0.23948	0.0011999	70.028	yes	0.941	0.943	0.927	1.064	1.092	1.034
837	AEFPFEVIPK	A0A1U8E9W4	Acyl-coenzyme A oxidase 4, peroxisomal OS=Capsicum annuum OX=4072 GN=T459_25881	2	588.819	-1.4549	0.0025002	76.228	yes	0.894	0.916	0.919	1.088	1.101	1.082
838	AEFPGAK	A0A1U8FSC8	Uncharacterized protein OS=Capsicum annuum OX=4072 GN=T459_32280	3	240.462	-2.1023	0.013444	60.788	yes	0.976	0.964	1.119	0.964	1.024	0.953
839	AEFPIFDK	A0A1U8EXY8	Glutathione peroxidase OS=Capsicum annuum OX=4072 GN=T459_32070	3	322.836	0.80225	0.029451	42.599	yes	1.151	0.884	1.051	0.926	1.105	0.884
840	AEFPIFDK	A0A1U8EXY8	Glutathione peroxidase OS=Capsicum annuum OX=4072 GN=T459_32070	2	483.75	-1.0301	0.0068693	93.649	yes	1.05	1.037	0.962	0.933	1.01	1.009
841	AEFPVFEK	A0A1U8HA99	Glutathione peroxidase OS=Capsicum annuum OX=4072 GN=T459_17991	2	483.75	-0.98706	0.0068285	90.15	yes	0.952	0.944	0.935	0.996	1.183	0.989
842	AEFPVFEK	A0A1U8HA99	Glutathione peroxidase OS=Capsicum annuum OX=4072 GN=T459_17991	3	322.836	0.6791	0.00829	61.962	yes	0.814	0.867	0.932	1.188	1.145	1.055
843	AEFTLPSITAEESVPER	A0A1U8FC27	AP-1 complex subunit mu-1 OS=Capsicum annuum OX=4072 GN=T459_27805	3	625.983	-1.0226	1.0386e-06	67.685	yes	NA	NA	NA	NA	NA	NA
844	AEGAMYLFPR	A0A2G3A3T6	Alanine aminotransferase 2 OS=Capsicum annuum OX=4072 GN=T459_11000	2	585.784	-0.94624	0.010018	50.978	no	0.995	0.937	0.983	0.994	1.051	1.039
845	AEGAMYLFPR	A0A2G3A3T6	Alanine aminotransferase 2 OS=Capsicum annuum OX=4072 GN=T459_11000	2	585.784	-2.2542	0.0097535	51.276	no	0.95	0.919	0.911	1.083	1.05	1.087
846	AEGAMYLFPR	A0A2G3A3T6	Alanine aminotransferase 2 OS=Capsicum annuum OX=4072 GN=T459_11000	2	577.787	-1.2867	0.00022409	94.692	no	0.876	0.873	0.974	1.115	1.097	1.065
847	AEGEVIVEDVRPTIGQAK	A0A2G2Y1P8	Coatomer subunit delta OS=Capsicum annuum OX=4072 GN=T459_32461	4	478.51	-0.11382	0.04743	22.435	yes	NA	NA	NA	NA	NA	NA
848	AEGEVIVEDVRPTIGQAK	A0A2G2Y1P8	Coatomer subunit delta OS=Capsicum annuum OX=4072 GN=T459_32461	3	637.678	-1.9037	1.8934e-64	186.97	yes	1	0.938	0.985	0.983	1.095	1
849	AEGFDLK	A0A2G2YA34	Glycine cleavage system P protein OS=Capsicum annuum OX=4072 GN=T459_31028	2	390.2	-0.26914	0.042552	67.032	yes	1.052	1.058	0.997	0.93	0.992	0.97
850	AEGFDLK	A0A2G2YA34	Glycine cleavage system P protein OS=Capsicum annuum OX=4072 GN=T459_31028	3	260.469	0.71754	0.0084766	74.415	yes	NA	NA	NA	NA	NA	NA
851	AEGFDLK	A0A2G2YA34	Glycine cleavage system P protein OS=Capsicum annuum OX=4072 GN=T459_31028	2	390.2	-1.3322	0.033187	75.213	yes	1.115	0.956	1.002	0.923	1.055	0.95
852	AEGFDLK	A0A2G2YA34	Glycine cleavage system P protein OS=Capsicum annuum OX=4072 GN=T459_31028	3	260.469	0.37027	0.0058222	83.377	yes	1.142	0.897	1.051	0.883	1.105	0.922
853	AEGFGASSIGGR	A0A1U8E5I9	Pectate lyase OS=Capsicum annuum OX=4072 GN=T459_22779	2	554.773	-0.036719	0.00086168	80.17	yes	1.028	1.03	1.017	0.923	1.026	0.976
854	AEGGQATVEIEK	A0A1U8EIE7	Dihydrolipoamide acetyltransferase component of pyruvate dehydrogenase complex OS=Capsicum annuum OX=4072 GN=T459_26871	3	411.21	-0.84306	6.976e-05	86.772	yes	1.096	0.968	1.02	0.85	1.089	0.977
855	AEGGQATVEIEK	A0A1U8EIE7	Dihydrolipoamide acetyltransferase component of pyruvate dehydrogenase complex OS=Capsicum annuum OX=4072 GN=T459_26871	2	616.312	-2.0282	4.0135e-14	139.3	yes	1	0.994	1.066	0.926	1.059	0.955
856	AEGIPSESHVVR	A0A2G3A6T3	CSC1-like protein ERD4 OS=Capsicum annuum OX=4072 GN=T459_05003	3	427.558	-0.18133	0.0021024	53.557	yes	NA	NA	NA	NA	NA	NA
857	AEGNILVDSPR	A0A1U8FNL1	Uncharacterized protein OS=Capsicum annuum OX=4072 GN=T459_04361	2	585.809	-1.1985	0.014519	51.612	yes	NA	NA	NA	NA	NA	NA
858	AEGSAVI	B5LAV3	2-isopropylmalate synthase B OS=Capsicum annuum OX=4072 GN=T459_16615	2	323.674	-0.12449	0.042623	66.994	yes	1.133	1.058	1.048	0.891	0.907	0.963
859	AEGVNKNSAPEFQK	A0A1U8FZN5	Oxygen-evolving enhancer protein 1, chloroplastic OS=Capsicum annuum OX=4072 GN=T459_06651	3	507.579	-2.3961	0.00011257	73.834	yes	0.995	0.966	1.035	0.964	1.023	1.018
860	AEGVNKNSAPEFQK	A0A1U8FZN5	Oxygen-evolving enhancer protein 1, chloroplastic OS=Capsicum annuum OX=4072 GN=T459_06651	3	507.251	-2.1096	4.7059e-06	95.57	yes	1.055	0.953	0.965	0.94	1.118	0.969
861	AEGVNKNSAPEFQK	A0A1U8FZN5	Oxygen-evolving enhancer protein 1, chloroplastic OS=Capsicum annuum OX=4072 GN=T459_06651	4	380.69	-0.73502	0.00036763	66.004	yes	NA	NA	NA	NA	NA	NA
862	AEGVSKNSAPEFQK	A0A1U8FJN4	Oxygen-evolving enhancer protein 1, chloroplastic OS=Capsicum annuum OX=4072 GN=T459_04694	3	498.247	-2.0395	1.1777e-18	124.16	yes	1.08	0.908	0.972	0.988	1.075	0.977
863	AEGVSKNSAPEFQK	A0A1U8FJN4	Oxygen-evolving enhancer protein 1, chloroplastic OS=Capsicum annuum OX=4072 GN=T459_04694	4	373.937	-1.1029	0.00014775	68.972	yes	NA	NA	NA	NA	NA	NA
864	AEHFHLVTK	A0A1U8H4D5	Delta-1-pyrroline-5-carboxylate dehydrogenase 12A1, mitochondrial OS=Capsicum annuum OX=4072 GN=T459_17725	4	271.15	0.79143	0.0072972	46.462	yes	1.001	0.91	1.131	0.798	1.038	1.123
865	AEIESTGVSTAMDLDQGLK	B5LAS6	Acetyl-coenzyme A carboxylase carboxyl transferase subunit alpha OS=Capsicum annuum OX=4072 GN=T459_23141	3	660.986	-1.7982	0.001138	40.616	yes	NA	NA	NA	NA	NA	NA
866	AEIESTGVSTAMDLDQGLK	B5LAS6	Acetyl-coenzyme A carboxylase carboxyl transferase subunit alpha OS=Capsicum annuum OX=4072 GN=T459_23141	3	655.654	-1.6942	9.4993e-20	107.03	yes	NA	NA	NA	NA	NA	NA
867	AEIPLAIMTSDDTHLR	A0A2G2ZP67	UDP-sugar pyrophosphorylase OS=Capsicum annuum OX=4072 GN=T459_12219	3	594.973	-0.015109	0.0040949	38.889	yes	NA	NA	NA	NA	NA	NA
868	AEISAALNK	A0A1U8GUM8	ATP synthase subunit b', chloroplastic OS=Capsicum annuum OX=4072 GN=T459_17104	2	458.759	-2.4723	0.00093271	105.98	yes	1.034	1.008	0.989	0.948	1.062	0.959
869	AEISAALNK	A0A1U8GUM8	ATP synthase subunit b', chloroplastic OS=Capsicum annuum OX=4072 GN=T459_17104	3	306.175	-1.0805	0.0043068	60.91	yes	NA	NA	NA	NA	NA	NA
870	AEISEYSK	A0A1U8E1T5	Putative mitochondrial-processing peptidase subunit alpha-1 OS=Capsicum annuum OX=4072 GN=T459_24308	2	463.727	-1.4862	0.005769	113.62	yes	1.068	1.063	1.034	0.915	1.044	0.875
871	AEISHIFR	A0A1U8H9L5	Dolichyl-diphosphooligosaccharide--protein glycosyltransferase subunit 2 OS=Capsicum annuum OX=4072 GN=T459_19366	3	324.847	-0.47878	0.0017095	93.374	yes	NA	NA	NA	NA	NA	NA
872	AEITEDDLGNMQYLK	A0A2G2ZZC6	Cytochrome P450 71A6 OS=Capsicum annuum OX=4072 GN=T459_09433	3	580.61	-1.3141	1.2933e-11	109.44	yes	1.062	0.958	0.997	0.945	1.047	0.991
873	AEKEELESSLSK	A0A2G2Y0B8	Acyl-CoA-binding domain-containing protein 4 OS=Capsicum annuum OX=4072 GN=T459_33002	3	450.565	-2.5678	0.0033738	53.034	yes	NA	NA	NA	NA	NA	NA
874	AEKPHLIVFTGDNIYGFDAK	A0A2G2YHG9	Putative inactive purple acid phosphatase 14 OS=Capsicum annuum OX=4072 GN=T459_28689	4	559.542	-1.6941	4.9348e-09	72.568	yes	0.995	0.891	0.972	0.918	1.159	1.064
875	AELALGVLYLNK	A0A1U8EDJ6	Peroxisomal membrane protein 11C OS=Capsicum annuum OX=4072 GN=T459_25097	3	435.259	0.36101	3.8487e-06	97.734	yes	0.935	1.106	0.965	0.994	1.04	0.96
876	AELDVFSK	A0A2G3A0H6	Alanine--tRNA ligase OS=Capsicum annuum OX=4072 GN=T459_09845	2	454.74	-1.4907	0.006391	101.65	yes	NA	NA	NA	NA	NA	NA
877	AELDVFSK	A0A2G3A0H6	Alanine--tRNA ligase OS=Capsicum annuum OX=4072 GN=T459_09845	3	303.496	0.10258	0.032189	41.448	yes	1.262	0.882	0.948	0.903	1.187	0.818
878	AELFADYVSVWPTK	A0A1U8E418	Alpha-1,4 glucan phosphorylase OS=Capsicum annuum OX=4072 GN=T459_23272	3	542.612	-0.40835	0.0017397	47.621	yes	1.017	0.981	0.964	0.942	1.203	0.893
879	AELGWEPK	A0A2G2ZA18	Uncharacterized protein OS=Capsicum annuum OX=4072 GN=T459_16793	2	465.24	-1.1304	0.014171	78.149	yes	NA	NA	NA	NA	NA	NA
880	AELGWEPK	A0A2G2ZA18	Uncharacterized protein OS=Capsicum annuum OX=4072 GN=T459_16793	3	310.496	0.54918	0.044213	36.395	yes	1.03	0.981	1.123	1.011	0.967	0.888
881	AELSAGTDIGNK	A0A2G2YVI2	Adenylate kinase 5, chloroplastic OS=Capsicum annuum OX=4072 GN=T459_24499	3	392.535	0.14747	5.4398e-14	129.89	yes	1.071	1.018	0.954	0.912	1.04	1.004
882	AELSAGTDIGNK	A0A2G2YVI2	Adenylate kinase 5, chloroplastic OS=Capsicum annuum OX=4072 GN=T459_24499	2	588.299	-1.9737	5.0683e-12	114.72	yes	1.011	1.003	0.968	1.032	1.034	0.953
883	AELSAGTDIGNK	A0A2G2YVI2	Adenylate kinase 5, chloroplastic OS=Capsicum annuum OX=4072 GN=T459_24499	3	392.535	0.4866	3.8487e-06	97.734	yes	0.976	0.929	1.019	1.009	1.112	0.955
884	AELSAGTDIGNK	A0A2G2YVI2	Adenylate kinase 5, chloroplastic OS=Capsicum annuum OX=4072 GN=T459_24499	2	588.299	-1.5373	5.426e-05	93.623	yes	NA	NA	NA	NA	NA	NA
885	AELSVFDADCELK	A0A1U8H8J3	Bifunctional dethiobiotin synthetase/7,8-diamino-pelargonic acid aminotransferase, mitochondrial OS=Capsicum annuum OX=4072 GN=T459_18709	3	499.569	-0.36913	0.00069589	62.088	yes	NA	NA	NA	NA	NA	NA
886	AELSVTSEWSPDGR	A0A2G3AN44	Eukaryotic translation initiation factor 2A OS=Capsicum annuum OX=4072 GN=T459_03538	3	511.911	-0.53307	5.2869e-05	76.01	yes	NA	NA	NA	NA	NA	NA
887	AENILITDK	A0A2G2Y593	Kinesin-like protein KCA2 (Fragment) OS=Capsicum annuum OX=4072 GN=T459_29325	2	508.785	-4.1693	0.013259	67.385	yes	1.043	1.021	1.008	0.989	1.007	0.932
888	AENILITDK	A0A2G2Y593	Kinesin-like protein KCA2 (Fragment) OS=Capsicum annuum OX=4072 GN=T459_29325	3	339.526	-2.9764	0.019782	42.718	yes	NA	NA	NA	NA	NA	NA
889	AENKEEDVSLGANK	A0A1U8GG90	Putative aquaporin PIP-type pTOM75 OS=Capsicum annuum OX=4072 GN=T459_00271	3	501.914		0.0019837	46.797	yes	NA	NA	NA	NA	NA	NA
890	AENLQHDNLAR	A0A2G2Z251	Uncharacterized protein OS=Capsicum annuum OX=4072 GN=T459_19590	3	427.55	-0.090961	1.5694e-05	89.805	yes	NA	NA	NA	NA	NA	NA
891	AEPDFSVLGK	A0A1U8F4P4	Isoleucine--tRNA ligase, cytoplasmic OS=Capsicum annuum OX=4072 GN=T459_29088	3	354.854	0.62692	0.0010674	71.451	yes	NA	NA	NA	NA	NA	NA
892	AEPDFSVLGK	A0A1U8F4P4	Isoleucine--tRNA ligase, cytoplasmic OS=Capsicum annuum OX=4072 GN=T459_29088	2	531.777	-1.5715	0.00033436	91.549	yes	0.953	0.957	1.014	1.017	1.042	1.017
893	AEPFDPSWADLYAQDVCALK	A0A2G2YPG4	Beta-fructofuranosidase, insoluble isoenzyme 1 OS=Capsicum annuum OX=4072 GN=T459_22427	3	766.025	-0.91253	0.0012729	41.513	yes	NA	NA	NA	NA	NA	NA
894	AEPPLRK	A0A2G2YNQ0	Protein QUIRKY OS=Capsicum annuum OX=4072 GN=T459_26470	3	270.833	-0.16686	0.014307	60.358	yes	NA	NA	NA	NA	NA	NA
895	AEPVIYK	A0A1U8E4S2	Thioredoxin-like protein Clot OS=Capsicum annuum OX=4072 GN=T459_33072	2	410.234	-2.3846	0.016507	89.55	yes	1.113	1.055	0.967	0.919	1.037	0.908
896	AEPVIYK	A0A1U8E4S2	Thioredoxin-like protein Clot OS=Capsicum annuum OX=4072 GN=T459_33072	3	273.825	0.37824	0.02177	50.966	yes	1.099	1.043	0.966	0.892	1.101	0.899
897	AEQAHGANNGIDIAIR	A0A2G2Z970	L-ascorbate peroxidase 1, cytosolic OS=Capsicum annuum OX=4072 GN=T459_16600	3	551.273	-0.87552	0.0083727	46.892	yes	NA	NA	NA	NA	NA	NA
898	AEQAHGANNGIDIAIR	A0A2G2Z970	L-ascorbate peroxidase 1, cytosolic OS=Capsicum annuum OX=4072 GN=T459_16600	3	550.945	-1.0283	2.3681e-07	79.837	yes	1.094	0.888	1.037	0.993	1.139	0.849
899	AEQAHGANNGIDIAIR	A0A2G2Z970	L-ascorbate peroxidase 1, cytosolic OS=Capsicum annuum OX=4072 GN=T459_16600	2	825.913		1.4282e-17	92.38	yes	NA	NA	NA	NA	NA	NA
900	AEQAHGANNGIDIAIR	A0A2G2Z970	L-ascorbate peroxidase 1, cytosolic OS=Capsicum annuum OX=4072 GN=T459_16600	3	550.945	-1.1213	5.5197e-28	131.61	yes	1.014	0.959	1.007	0.992	1.047	0.981
901	AEQAHGANNGIDIAIR	A0A2G2Z970	L-ascorbate peroxidase 1, cytosolic OS=Capsicum annuum OX=4072 GN=T459_16600	2	825.913	-2.0629	5.857e-46	176.49	yes	0.826	0.9	0.955	1.084	1.224	1.011
902	AEQAHGANNGIDIAIR	A0A2G2Z970	L-ascorbate peroxidase 1, cytosolic OS=Capsicum annuum OX=4072 GN=T459_16600	3	550.945	-1.2019	1.4617e-09	99.055	yes	1.113	0.867	0.956	1.008	1.049	1.008
903	AEQAHGANNGIDIAIR	A0A2G2Z970	L-ascorbate peroxidase 1, cytosolic OS=Capsicum annuum OX=4072 GN=T459_16600	3	550.617	-1.4123	9.761e-09	96.208	yes	1.096	1.043	0.92	0.884	1.049	1.007
904	AEQIQIYAGDVVPR	A0A1U8G4W6	Haloacid dehalogenase-like hydrolase domain-containing protein OS=Capsicum annuum OX=4072 GN=T459_08259	3	520.279	-0.36045	0.0001703	66.246	yes	1.346	0.527	1.216	0.781	1.084	1.046
905	AEQIQIYAGDVVPR	A0A1U8G4W6	Haloacid dehalogenase-like hydrolase domain-containing protein OS=Capsicum annuum OX=4072 GN=T459_08259	2	779.915	-1.8828	1.5913e-08	107.5	yes	1.075	0.939	0.944	0.957	1.047	1.039
906	AEQLLHILR	A0A2G2YPS4	Protein SHOOT GRAVITROPISM 6 OS=Capsicum annuum OX=4072 GN=T459_22528	3	364.889	0.18915	0.0037254	64.654	yes	0.941	1.011	1.093	1.071	0.942	0.942
907	AEQWNVEVY	A0A1U8FMQ7	Ferredoxin--NADP reductase, chloroplastic OS=Capsicum annuum OX=4072 GN=T459_06219	2	569.264	-0.77703	0.0076454	74.92	yes	1.056	0.939	1.108	0.937	0.968	0.992
908	AEQYLADSGIPYTIIR	A0A2G2XVY2	Sanguinarine reductase OS=Capsicum annuum OX=4072 GN=T459_34518	3	603.984	-0.68825	1.0153e-06	76.378	yes	NA	NA	NA	NA	NA	NA
909	AEQYLADSGIPYTIIR	A0A2G2XVY2	Sanguinarine reductase OS=Capsicum annuum OX=4072 GN=T459_34518	2	905.473	-1.2723	0.0095406	43.208	yes	NA	NA	NA	NA	NA	NA
910	AERPEVR	A0A2G2YPH5	60S ribosomal protein L24 OS=Capsicum annuum OX=4072 GN=T459_22451	3	286.159	-0.17263	0.011663	77.058	yes	0.92	0.841	1.031	1.146	1.04	1.023
911	AERPWDPPLHQDGK	A0A1U8GWB5	Uncharacterized protein OS=Capsicum annuum OX=4072 GN=T459_14798	3	549.274	-1.4729	0.0027435	46.797	yes	1.046	0.917	0.99	1.045	1.003	0.998
912	AERPWDPPLHQDGK	A0A1U8GWB5	Uncharacterized protein OS=Capsicum annuum OX=4072 GN=T459_14798	4	412.207	-0.35872	0.0048487	37.613	yes	1.011	0.937	1.176	0.964	1.122	0.79
913	AESDKLPSDVR	A0A1U8EU58	Uncharacterized protein OS=Capsicum annuum OX=4072 GN=T459_30138	3	406.21	-0.7733	0.0045344	53.211	yes	NA	NA	NA	NA	NA	NA
914	AESEVLSK	A0A2G3AFN6	Uncharacterized protein OS=Capsicum annuum OX=4072 GN=T459_00926	2	431.729	-1.6403	0.0068693	93.649	yes	0.983	0.892	0.887	1.051	1.143	1.044
915	AESIVQSTVR	A0A1U8DW23	Peroxidase OS=Capsicum annuum OX=4072 GN=T459_32043	2	545.299	-1.1195	0.00032903	91.701	yes	NA	NA	NA	NA	NA	NA
916	AESSAYIPSGTAR	A0A2G2YQ26	Uncharacterized protein OS=Capsicum annuum OX=4072 GN=T459_22633	2	655.323	-2.5982	0.0016857	65.043	yes	1.174	0.942	1.257	0.765	1.018	0.844
917	AESSSGSQEQVFVR	A0A2G2ZF41	Cullin-1 OS=Capsicum annuum OX=4072 GN=T459_18583	2	755.86	-2.6482	0.00020316	76.759	yes	0.839	1.105	0.979	1.113	0.964	1
918	AESVDYDGK	A0A1U8GEH7	Pathogenesis-related protein STH-21 OS=Capsicum annuum OX=4072 GN=T459_07754	2	492.219	-0.63415	0.00089834	113.93	yes	0.435	0.467	0.386	1.508	1.564	1.641
919	AESVDYDGK	A0A1U8GEH7	Pathogenesis-related protein STH-21 OS=Capsicum annuum OX=4072 GN=T459_07754	2	492.219	-1.8697	0.00089834	113.93	yes	0.494	0.454	0.533	1.438	1.686	1.394
920	AESVDYDGK	A0A1U8GEH7	Pathogenesis-related protein STH-21 OS=Capsicum annuum OX=4072 GN=T459_07754	3	328.482	0.13144	0.047744	33.378	yes	NA	NA	NA	NA	NA	NA
921	AESWVITK	A0A2G3A9A3	Leucine--tRNA ligase OS=Capsicum annuum OX=4072 GN=T459_05920	3	311.84		0.0052558	61.962	yes	NA	NA	NA	NA	NA	NA
922	AETGILFEK	B5LAW1	Alanine--glyoxylate aminotransferase 2-like protein 1, mitochondrial OS=Capsicum annuum OX=4072 GN=T459_30335	2	504.274	-1.7803	0.00080928	112.13	yes	0.941	0.956	0.884	1.064	1.12	1.036
923	AETLAPGFWVGIK	A0A2G3A0Q6	Tubulin-folding cofactor B OS=Capsicum annuum OX=4072 GN=T459_09928	3	463.591	-0.21267	0.0031672	46.159	yes	NA	NA	NA	NA	NA	NA
924	AETVATPQSAHK	A0A2G3AGG7	Uncharacterized protein OS=Capsicum annuum OX=4072 GN=T459_01218	3	413.882	-0.77464	0.00026543	74.611	yes	0.984	0.921	1.067	1.012	0.988	1.028
925	AETVAYDDFVSAGSFGAAR	A0A2G2Z6A1	Obg-like ATPase 1 OS=Capsicum annuum OX=4072 GN=T459_21060	3	645.302	-1.4828	0.00016264	48.006	yes	NA	NA	NA	NA	NA	NA
926	AEVADVSEAVR	A0A1U8GCZ8	Pyruvate kinase OS=Capsicum annuum OX=4072 GN=T459_07887	2	573.293	-1.3037	5.0046e-07	103.44	yes	1.051	1.012	1.038	1.049	0.925	0.925
927	AEVESLIK	A0A1U8GDS5	Uncharacterized protein OS=Capsicum annuum OX=4072 GN=T459_12407	2	444.755	-3.3968	0.0068693	93.649	yes	0.91	0.871	0.956	0.819	1.524	0.921
928	AEVGVGPLTWSSMLAK	A0A1U8FJN9	STS14 protein OS=Capsicum annuum OX=4072 GN=T459_04687	3	549.292	-1.0101	0.0013145	45.873	yes	NA	NA	NA	NA	NA	NA
929	AEVGVGPLTWSSMLAK	A0A1U8FJN9	STS14 protein OS=Capsicum annuum OX=4072 GN=T459_04687	3	554.624	-0.75614	0.00026022	53.981	yes	1.04	0.933	0.83	1.069	1.122	1.006
930	AEVIGGHK	A0A2G2Y0V8	Thioredoxin-like 3-1, chloroplastic OS=Capsicum annuum OX=4072 GN=T459_32724	3	270.82	0.069832	0.0048555	73.26	yes	0.98	0.875	0.871	1.104	1.03	1.141
931	AEVISGER	A0A2G2Z2V0	Threonine--tRNA ligase OS=Capsicum annuum OX=4072 GN=T459_19825	2	430.727	-0.75803	0.020625	72.23	yes	0.942	0.941	0.943	1.101	1.102	0.972
932	AEVNGGTTVK	A0A2G3AIQ7	50S ribosomal protein L22, chloroplastic OS=Capsicum annuum OX=4072 GN=T459_02007	2	488.751	-1.979	0.00079532	88.338	yes	0.962	0.87	0.923	1.055	1.156	1.034
933	AEVSGASAVALASGLAK	A0A2G2ZQ98	Uncharacterized protein OS=Capsicum annuum OX=4072 GN=T459_12606	3	501.279	-1.6487	0.0026337	41.482	yes	NA	NA	NA	NA	NA	NA
934	AEVSPPSTGPAYPTR	A0A1U8HLF6	Thioredoxin-like protein, chloroplastic OS=Capsicum annuum OX=4072 GN=T459_20844	2	765.383	-1.0396	1.5623e-05	74.789	yes	1.017	0.899	0.961	1.154	1.021	0.949
935	AEVSPPSTGPAYPTR	A0A1U8HLF6	Thioredoxin-like protein, chloroplastic OS=Capsicum annuum OX=4072 GN=T459_20844	3	510.591	-0.6554	3.3475e-07	81.703	yes	0.844	0.803	1.032	1.135	1.096	1.09
936	AEVSPPSTGPAYPTR	A0A1U8HLF6	Thioredoxin-like protein, chloroplastic OS=Capsicum annuum OX=4072 GN=T459_20844	2	765.383	-1.816	0.003154	50.305	yes	0.891	1.066	1.061	0.895	1.102	0.984
937	AEVVSPAEWER	A0A2G2ZW59	Protein LOW PSII ACCUMULATION 1, chloroplastic OS=Capsicum annuum OX=4072 GN=T459_08297	2	636.815	-1.1246	1.8705e-05	96.604	yes	NA	NA	NA	NA	NA	NA
938	AEVVSQDEK	A0A1U8FXN4	3-dehydroquinate synthase, chloroplastic OS=Capsicum annuum OX=4072 GN=T459_06199	2	502.748	-1.8537	0.0016884	91.549	yes	0.932	0.914	0.819	1.091	1.101	1.142
939	AEYAVDHNSGTGAVFFR	A0A2G2ZEA8	Protein TOC75, chloroplastic OS=Capsicum annuum OX=4072 GN=T459_18277	3	614.292	-2.0552	1.3568e-14	107.5	yes	0.983	1.037	1.097	0.992	0.905	0.986
940	AEYAVEPAK	A0A1U8G1U5	Uncharacterized protein OS=Capsicum annuum OX=4072 GN=T459_08525	3	326.503	-0.11799	0.010687	48.794	yes	NA	NA	NA	NA	NA	NA
941	AEYAVEPAK	A0A1U8G1U5	Uncharacterized protein OS=Capsicum annuum OX=4072 GN=T459_08525	2	489.251	-1.4115	0.00093271	105.98	yes	1.098	1.029	0.935	0.963	1.031	0.944
942	AEYDESGPAIVHR	A0A2G2Y8W6	Actin-7 OS=Capsicum annuum OX=4072 GN=T459_30603	3	481.9	-0.41035	1.154e-12	113.61	yes	0.873	0.997	0.958	1.038	1.102	1.033
943	AEYPIFDK	A0A2G3AE16	Glutathione peroxidase OS=Capsicum annuum OX=4072 GN=T459_00315	3	328.168	0.39387	0.0092882	58.981	yes	0.786	0.646	0.773	1.217	1.411	1.166
944	AFADASMNMAYQK	A0A2G2YW44	Isocitrate dehydrogenase [NADP] OS=Capsicum annuum OX=4072 GN=T459_21257	3	493.88	-1.9775	0.00055425	59.198	yes	0.903	0.896	0.893	1.088	1.148	1.073
945	AFADASMNMAYQK	A0A2G2YW44	Isocitrate dehydrogenase [NADP] OS=Capsicum annuum OX=4072 GN=T459_21257	3	493.88	-0.51906	0.0001152	67.385	yes	0.921	0.971	0.958	1.031	1.073	1.046
946	AFADASMNMAYQK	A0A2G2YW44	Isocitrate dehydrogenase [NADP] OS=Capsicum annuum OX=4072 GN=T459_21257	3	493.88	-0.96729	0.0012688	50.354	yes	NA	NA	NA	NA	NA	NA
947	AFADASMNMAYQK	A0A2G2YW44	Isocitrate dehydrogenase [NADP] OS=Capsicum annuum OX=4072 GN=T459_21257	3	488.548	-1.8984	0.0039617	42.083	yes	NA	NA	NA	NA	NA	NA
948	AFADEIGIPFLETSAK	A0A2G2ZKD5	Ras-related protein RABD2a OS=Capsicum annuum OX=4072 GN=T459_15420	3	570.298	-0.78125	2.6413e-11	107.74	yes	0.993	0.969	0.93	1.034	1.028	1.047
949	AFADEIGIPFLETSAK	A0A2G2ZKD5	Ras-related protein RABD2a OS=Capsicum annuum OX=4072 GN=T459_15420	2	854.943	-1.0739	3.5766e-10	102.65	yes	0.927	0.942	0.987	1.047	1.04	1.058
950	AFADEIGIPFLETSAK	A0A2G2ZKD5	Ras-related protein RABD2a OS=Capsicum annuum OX=4072 GN=T459_15420	4	427.975	0.37294	0.0024246	38.661	yes	NA	NA	NA	NA	NA	NA
951	AFADEIGIPFMEASAK	A0A2G2YRT3	Uncharacterized protein OS=Capsicum annuum OX=4072 GN=T459_23238	3	566.28	-0.86108	9.102e-05	60.968	yes	1.025	1.007	0.998	0.909	1.038	1.022
952	AFAFAELEAR	A0A2G2ZYR9	Clp protease-related protein, chloroplastic OS=Capsicum annuum OX=4072 GN=T459_09223	2	562.79	0.12207	0.0019635	77.662	yes	1.031	0.896	1.078	0.915	1.104	0.977
953	AFAFAELEAR	A0A2G2ZYR9	Clp protease-related protein, chloroplastic OS=Capsicum annuum OX=4072 GN=T459_09223	3	375.529	0.96837	0.00035656	80.688	yes	1.34	0.616	1.035	1.276	0.514	1.219
954	AFAGIVPR	A0A1U8GNB7	Dolichyl-diphosphooligosaccharide--protein glycosyltransferase subunit 2 OS=Capsicum annuum OX=4072 GN=T459_14882	2	415.748	-0.010014	0.023956	69.176	yes	1.052	1.128	1.056	0.862	0.92	0.981
955	AFAGTLVQFMEK	A0A2G2Y873	Uncharacterized protein (Fragment) OS=Capsicum annuum OX=4072 GN=T459_30390	3	447.901	-0.2309	0.0029883	50.354	yes	NA	NA	NA	NA	NA	NA
956	AFAHPPK	A0A2G2YS78	Uncharacterized protein OS=Capsicum annuum OX=4072 GN=T459_23393	3	256.478	1.1801	0.022675	50.12	yes	NA	NA	NA	NA	NA	NA
957	AFALMSEEGIAK	A0A2G3A0H6	Alanine--tRNA ligase OS=Capsicum annuum OX=4072 GN=T459_09845	2	641.821	-1.478	0.0043898	52.247	yes	0.978	0.958	1.029	1.01	1.037	0.988
958	AFALSTTQFPELR	A0A2G3A4Q7	Uncharacterized protein OS=Capsicum annuum OX=4072 GN=T459_04342	3	494.265	-0.07972	0.0014542	55.261	yes	NA	NA	NA	NA	NA	NA
959	AFAQGMIK	A0A1U8EYL5	Peroxidase OS=Capsicum annuum OX=4072 GN=T459_29363	2	433.234	-0.49276	0.01269	80.229	yes	NA	NA	NA	NA	NA	NA
960	AFASDFAAAMIR	A4ZCI6	Peroxidase OS=Capsicum annuum OX=4072 GN=PO2	2	635.816	-1.487	0.0038844	58.781	yes	NA	NA	NA	NA	NA	NA
961	AFATGGYAAMQR	A0A2G2Y5C6	Phospho-2-dehydro-3-deoxyheptonate aldolase OS=Capsicum annuum OX=4072 GN=T459_29357	2	630.296	-2.1774	0.001759	58.511	no	1.081	1.007	0.937	0.938	1.045	0.993
962	AFATGGYAAMQR	A0A2G2Y5C6	Phospho-2-dehydro-3-deoxyheptonate aldolase OS=Capsicum annuum OX=4072 GN=T459_29357	2	630.296	-1.5095	0.0019241	57.293	no	NA	NA	NA	NA	NA	NA
963	AFATGGYAAMQR	A0A2G2Y5C6	Phospho-2-dehydro-3-deoxyheptonate aldolase OS=Capsicum annuum OX=4072 GN=T459_29357	2	622.298	-3.3626	8.4361e-05	90.434	no	1	1.009	1.007	0.918	1.011	1.056
964	AFATGGYAAMQR	A0A2G2Y5C6	Phospho-2-dehydro-3-deoxyheptonate aldolase OS=Capsicum annuum OX=4072 GN=T459_29357	3	415.201	-2.3202	0.0077822	43.306	no	NA	NA	NA	NA	NA	NA
965	AFATPNLLK	A0A2G2Y2M7	5'-methylthioadenosine/S-adenosylhomocysteine nucleosidase 1 OS=Capsicum annuum OX=4072 GN=T459_32089	2	487.787	-1.4279	0.0024158	86.898	yes	1.028	1.046	0.995	0.952	1.017	0.962
966	AFATYTNAK	A0A1U8E418	Alpha-1,4 glucan phosphorylase OS=Capsicum annuum OX=4072 GN=T459_23272	2	493.751	-1.9045	1.4554e-06	144.65	yes	1.017	0.973	0.943	0.961	1.044	1.062
967	AFATYVQAK	A0A2G2YDS4	Alpha-1,4 glucan phosphorylase OS=Capsicum annuum OX=4072 GN=T459_27188	2	499.769	-1.6065	0.00025017	132.01	no	0.94	0.965	0.998	0.994	1.103	1
968	AFCDSSKPGR	A0A1U8EEI1	Uncharacterized protein OS=Capsicum annuum OX=4072 GN=T459_24627	3	375.51	-0.68593	0.024592	41.664	yes	0.991	0.999	0.915	0.964	1.145	0.986
969	AFCDVYPLIPK	A0A2G2XUZ0	Uncharacterized protein OS=Capsicum annuum OX=4072 GN=T459_34867	2	661.844	-2.1556	2.5454e-08	121.9	yes	0.971	0.933	0.928	1.019	1.067	1.083
970	AFCSGGDQALR	A0A2G2XZJ4	1,4-dihydroxy-2-naphthoyl-CoA synthase OS=Capsicum annuum OX=4072 GN=T459_33283	2	591.272	-2.1097	2.1704e-07	107.34	yes	1.11	0.95	0.968	0.957	1.04	0.975
971	AFDDEEQPYLPK	A0A2G2Z916	Asparagine synthetase [glutamine-hydrolyzing] OS=Capsicum annuum OX=4072 GN=T459_16555	2	726.338	-1.6533	0.0025676	63.091	yes	0.766	0.671	0.701	1.126	1.436	1.3
972	AFDDVNSQLQTK	A0A1U8ELT5	ATP synthase subunit d, mitochondrial OS=Capsicum annuum OX=4072 GN=T459_28370	3	456.221	-1.6344	0.00034195	78.903	yes	0.977	1.001	0.901	1.016	1.047	1.058
973	AFDDVNSQLQTK	A0A1U8ELT5	ATP synthase subunit d, mitochondrial OS=Capsicum annuum OX=4072 GN=T459_28370	2	683.828	-2.5469	4.456e-05	96.464	yes	1.052	0.924	0.877	0.942	1.184	1.021
974	AFDDVNSQLQTK	A0A1U8ELT5	ATP synthase subunit d, mitochondrial OS=Capsicum annuum OX=4072 GN=T459_28370	2	683.336	-1.4017	4.0135e-14	139.3	yes	0.974	0.971	0.988	0.963	1.061	1.044
975	AFDDVNSQLQTK	A0A1U8ELT5	ATP synthase subunit d, mitochondrial OS=Capsicum annuum OX=4072 GN=T459_28370	3	455.893	-0.33579	0.00027159	72.29	yes	NA	NA	NA	NA	NA	NA
976	AFDDVNSQLQTK	A0A1U8ELT5	ATP synthase subunit d, mitochondrial OS=Capsicum annuum OX=4072 GN=T459_28370	2	683.336	-1.5745	2.8015e-26	172.57	yes	1.031	0.962	1.037	0.993	1.044	0.933
977	AFDDVNSQLQTK	A0A1U8ELT5	ATP synthase subunit d, mitochondrial OS=Capsicum annuum OX=4072 GN=T459_28370	4	342.172	0.11262	0.00049526	60.255	yes	1.008	0.905	1.119	0.944	1.066	0.958
978	AFDEDGNLK	A0A2G2YBU1	Phytanoyl-CoA dioxygenase OS=Capsicum annuum OX=4072 GN=T459_26704	2	504.735	-1.89	0.007699	74.849	yes	NA	NA	NA	NA	NA	NA
979	AFDEGPWPK	A0A1U8G625	Aldehyde dehydrogenase, mitochondrial OS=Capsicum annuum OX=4072 GN=T459_10267	2	523.751	-2.158	0.00019148	134.25	no	1.1	0.961	0.967	0.965	1.026	0.98
980	AFDEGTR	A0A1U8H1J1	60S ribosomal protein L27 OS=Capsicum annuum OX=4072 GN=T459_18534	2	398.185	0.6302	0.019436	86.472	yes	0.982	0.966	0.962	1.073	0.944	1.073
981	AFDEGWGAVIAK	A0A2G3A0R6	Dihydropyrimidine dehydrogenase (NADP(+)), chloroplastic OS=Capsicum annuum OX=4072 GN=T459_09904	3	421.884	0.25682	1.5288e-05	92.866	yes	1.008	1.027	0.918	1.029	0.994	1.024
982	AFDEGWGAVIAK	A0A2G3A0R6	Dihydropyrimidine dehydrogenase (NADP(+)), chloroplastic OS=Capsicum annuum OX=4072 GN=T459_09904	2	632.322	-0.95246	9.0555e-20	158.04	yes	0.99	0.925	0.994	0.978	1.111	1.002
983	AFDLASKPEGTGTPTK	A0A2G2XVY2	Sanguinarine reductase OS=Capsicum annuum OX=4072 GN=T459_34518	3	540.614	0.64994	3.0587e-28	136.34	yes	1.092	1.001	0.99	0.914	1.068	0.934
984	AFDLASKPEGTGTPTK	A0A2G2XVY2	Sanguinarine reductase OS=Capsicum annuum OX=4072 GN=T459_34518	4	405.712	1.5756	8.7944e-08	82.837	yes	1.124	0.97	0.974	0.906	1.074	0.953
985	AFDLGGHQIAR	A0A1U8DX63	GTP-binding protein SAR1B OS=Capsicum annuum OX=4072 GN=T459_34595	3	395.544	-1.5727	0.00080202	64.82	no	NA	NA	NA	NA	NA	NA
986	AFDLGGHQIAR	A0A1U8DX63	GTP-binding protein SAR1B OS=Capsicum annuum OX=4072 GN=T459_34595	2	592.812	-2.3474	0.00039182	83.652	no	NA	NA	NA	NA	NA	NA
987	AFDNPDFFNK	A0A2G2YK41	Uncharacterized protein OS=Capsicum annuum OX=4072 GN=T459_25220	3	405.521	-0.80546	0.0053925	51.445	yes	0.959	0.911	1.059	1.077	1.055	0.939
988	AFDPPLPER	A0A1U8GCZ8	Pyruvate kinase OS=Capsicum annuum OX=4072 GN=T459_07887	2	521.272	-1.8858	0.019202	57.859	yes	NA	NA	NA	NA	NA	NA
989	AFDQTVR	A0A1U8F484	Uncharacterized protein OS=Capsicum annuum OX=4072 GN=T459_31455	2	418.717	-0.79972	0.049557	63.21	yes	NA	NA	NA	NA	NA	NA
990	AFDTSYVGFMK	A0A1U8DZD5	Uncharacterized protein OS=Capsicum annuum OX=4072 GN=T459_33518	2	641.295	-2.2743	0.022723	41.704	yes	1.049	0.983	1.059	0.948	1.031	0.931
991	AFDTSYVGFMK	A0A1U8DZD5	Uncharacterized protein OS=Capsicum annuum OX=4072 GN=T459_33518	2	633.297	-0.69274	4.0595e-15	155.97	yes	1.112	1.066	1.03	0.873	1.01	0.908
992	AFDYHIR	A0A1U8EE55	Uncharacterized protein OS=Capsicum annuum OX=4072 GN=T459_24705	3	307.824	0.75374	0.010593	67.035	yes	1.13	1.016	0.975	1.039	0.972	0.868
993	AFEDPDIIHVDDTVDPVR	Q9M7P3	Obg-like ATPase 1 OS=Capsicum annuum OX=4072 GN=T459_04458	3	685.001	-1.1679	1.1812e-18	116.06	yes	0.905	0.9	1.067	1.01	1.182	0.935
994	AFEDSIR	A0A2G2Z5Q5	Trigger factor-like protein TIG, Chloroplastic OS=Capsicum annuum OX=4072 GN=T459_20845	2	419.209	-1.3311	0.024285	82.671	yes	1.083	1.129	1.075	0.914	0.945	0.854
995	AFEEAEK	A0A1U8H311	Cell division cycle protein 48-like protein OS=Capsicum annuum OX=4072 GN=T459_18122	2	412.195	-2.5824	0.016873	93.374	no	0.659	0.622	0.689	1.252	1.509	1.269
996	AFEEVLLFDPNNK	A0A1U8GLW1	Uncharacterized protein OS=Capsicum annuum OX=4072 GN=T459_12166	3	512.596	-0.27339	0.00013522	74.611	yes	1.002	1.062	0.921	1.043	0.96	1.011
997	AFEEVLLFDPNNK	A0A1U8GLW1	Uncharacterized protein OS=Capsicum annuum OX=4072 GN=T459_12166	2	768.391	-1.1318	9.467e-14	120.87	yes	1.074	0.956	0.961	0.928	1.046	1.035
998	AFEEVLLFDPNNK	A0A1U8GLW1	Uncharacterized protein OS=Capsicum annuum OX=4072 GN=T459_12166	3	512.924	-0.4422	0.0033175	49.448	yes	NA	NA	NA	NA	NA	NA
999	AFEFGQTYVVKPK	A0A2G2YUS0	Uncharacterized protein OS=Capsicum annuum OX=4072 GN=T459_24170	3	505.273	-1.2381	8.7383e-17	143.98	yes	0.969	0.982	0.999	0.95	1.148	0.952
1000	AFEPGLLAK	A0A2G2YJA3	Mg-protoporphyrin IX chelatase OS=Capsicum annuum OX=4072 GN=T459_24927	2	473.274	-0.65525	0.0012912	100.02	yes	1.175	1.101	1.184	0.832	0.842	0.865
1001	AFEPGLLAK	A0A2G2YJA3	Mg-protoporphyrin IX chelatase OS=Capsicum annuum OX=4072 GN=T459_24927	2	473.274	-0.58665	0.0033395	83.948	yes	NA	NA	NA	NA	NA	NA
1002	AFEPGLLAK	A0A2G2YJA3	Mg-protoporphyrin IX chelatase OS=Capsicum annuum OX=4072 GN=T459_24927	3	315.852	0.62558	0.024321	40.352	yes	1.373	1.098	1.091	0.863	0.798	0.778
1003	AFEPILLLGR	A0A1U8DZA9	40S ribosomal protein S16 OS=Capsicum annuum OX=4072 GN=T459_02663	2	564.842	-0.70112	2.183e-05	125.97	yes	1.041	1.021	0.955	0.964	1.049	0.97
1004	AFEPILLLGR	A0A1U8DZA9	40S ribosomal protein S16 OS=Capsicum annuum OX=4072 GN=T459_02663	3	376.897	0.34818	0.00025659	83.948	yes	1.006	1.037	0.917	0.831	1.041	1.168
1005	AFEPILLLGR	A0A1U8DZA9	40S ribosomal protein S16 OS=Capsicum annuum OX=4072 GN=T459_02663	2	564.842	-0.46412	9.011e-06	131.52	yes	0.957	1.033	0.948	0.941	1.064	1.057
1006	AFEPILLLGR	A0A1U8DZA9	40S ribosomal protein S16 OS=Capsicum annuum OX=4072 GN=T459_02663	3	376.897	0.66373	4.8722e-05	95.502	yes	1.007	1.01	0.935	1.099	1.006	0.942
1007	AFETQLEK	A0A1U8F4P4	Isoleucine--tRNA ligase, cytoplasmic OS=Capsicum annuum OX=4072 GN=T459_29088	2	483.251	-1.6692	0.0050713	107.21	yes	1.013	1.015	0.99	0.96	1.06	0.963
1008	AFETQLEK	A0A1U8F4P4	Isoleucine--tRNA ligase, cytoplasmic OS=Capsicum annuum OX=4072 GN=T459_29088	3	322.503	0.25116	0.026573	43.808	yes	NA	NA	NA	NA	NA	NA
1009	AFEVIEAFK	A0A2G2YEQ1	Uncharacterized protein OS=Capsicum annuum OX=4072 GN=T459_27704	2	527.284	-1.4266	1.8958e-06	142.43	yes	1.06	1.022	1.066	0.944	0.979	0.927
1010	AFEVIEAFK	A0A2G2YEQ1	Uncharacterized protein OS=Capsicum annuum OX=4072 GN=T459_27704	3	351.859	0.15737	0.0013773	77.732	yes	1.092	1.06	1.035	0.892	1.01	0.91
1011	AFEYFDKDK	A0A2G3APE8	Calcium-dependent protein kinase 34 OS=Capsicum annuum OX=4072 GN=T459_03905	3	388.185	-1.3213	0.010925	53.751	yes	NA	NA	NA	NA	NA	NA
1012	AFEYFDKDK	A0A2G3APE8	Calcium-dependent protein kinase 34 OS=Capsicum annuum OX=4072 GN=T459_03905	3	388.185	-1.0306	0.015771	49.06	yes	NA	NA	NA	NA	NA	NA
1013	AFEYYDGMTK	A0A1U8HEG3	Uncharacterized protein OS=Capsicum annuum OX=4072 GN=T459_02119	2	620.763	-2.6145	0.024162	43.308	yes	NA	NA	NA	NA	NA	NA
1014	AFFAGSQR	A0A1U8EB09	Putative glucan 1,3-alpha-glucosidase OS=Capsicum annuum OX=4072 GN=T459_03186	2	442.225	-0.78095	0.021553	71.379	yes	1.194	0.976	0.935	0.91	0.96	1.025
1015	AFFDSTGQLWK	A0A2G3A420	Putative NAD(P)H dehydrogenase (Quinone) FQR1-like 2 OS=Capsicum annuum OX=4072 GN=T459_04100	2	650.322	-1.3374	3.2796e-08	110.31	yes	0.927	0.884	0.965	1.032	1.142	1.049
1016	AFFQEFSQLDGK	A0A1U8FXA5	Aspartyl aminopeptidase OS=Capsicum annuum OX=4072 GN=T459_10051	3	472.898	-0.51061	2.0385e-05	90.697	yes	1.069	0.972	0.899	1.03	1.051	0.978
1017	AFFQEFSQLDGK	A0A1U8FXA5	Aspartyl aminopeptidase OS=Capsicum annuum OX=4072 GN=T459_10051	2	708.843	-1.4413	3.768e-17	151.74	yes	0.969	0.946	1.019	1.015	1.014	1.037
1018	AFFSSGEAK	A0A2G2ZBB3	Uncharacterized protein OS=Capsicum annuum OX=4072 GN=T459_17311	2	472.23	0.9602	0.0084562	73.841	yes	1.05	0.95	0.996	0.953	1.017	1.035
1019	AFFTNQQGK	A0A2G3A1K5	HIPL2 protein OS=Capsicum annuum OX=4072 GN=T459_10221	2	520.762	-1.9934	0.036066	51.276	yes	NA	NA	NA	NA	NA	NA
1020	AFFTNSGSEANDTQVK	A0A2G3A109	Gamma-aminobutyrate transaminase 1, mitochondrial OS=Capsicum annuum OX=4072 GN=T459_10018	3	572.601	-0.84066	1.4065e-28	137.93	no	1.008	0.944	1.034	1.025	1.078	0.911
1021	AFFTNSGSEANDTQVK	A0A2G3A109	Gamma-aminobutyrate transaminase 1, mitochondrial OS=Capsicum annuum OX=4072 GN=T459_10018	2	858.397	-0.87969	3.2793e-14	111.22	no	1.032	0.954	0.989	1.051	0.943	1.031
1022	AFFTNSGSEANDTQVK	A0A2G3A109	Gamma-aminobutyrate transaminase 1, mitochondrial OS=Capsicum annuum OX=4072 GN=T459_10018	3	572.929	-1.1449	2.7562e-15	118.21	no	0.944	0.998	0.863	1.048	1.065	1.082
1023	AFFTNSGSEANDTQVK	A0A2G3A109	Gamma-aminobutyrate transaminase 1, mitochondrial OS=Capsicum annuum OX=4072 GN=T459_10018	3	572.929	-2.5716	1.3604e-08	96.247	no	1.025	0.954	0.951	0.971	1.079	1.021
1024	AFGADLILTDPTK	A0A1U8DSU5	Cysteine synthase OS=Capsicum annuum OX=4072 GN=T459_21819	3	454.582	0.32852	0.00042092	65.03	yes	NA	NA	NA	NA	NA	NA
1025	AFGADLILTDPTK	A0A1U8DSU5	Cysteine synthase OS=Capsicum annuum OX=4072 GN=T459_21819	2	681.369	-0.23786	9.467e-14	120.87	yes	1.045	0.813	0.927	1.003	1.115	1.097
1026	AFGAELVLTDPAK	A0A2G3AN00	Cysteine synthase OS=Capsicum annuum OX=4072 GN=T459_03488	3	444.578	-0.22123	0.00014535	72.29	no	1.127	0.887	1.024	0.951	1.082	0.929
1027	AFGAELVLTDPAK	A0A2G3AN00	Cysteine synthase OS=Capsicum annuum OX=4072 GN=T459_03488	2	666.364	-1.6113	5.8473e-12	111.79	no	0.955	0.987	1.028	0.977	1.098	0.954
1028	AFGALLK	A0A1U8EFP6	RAN GTPase-activating protein 1 OS=Capsicum annuum OX=4072 GN=T459_23324	2	360.226	-0.74843	0.02839	79.454	yes	NA	NA	NA	NA	NA	NA
1029	AFGASEIIAVDVQDEK	A0A1U8FEW5	Uncharacterized protein OS=Capsicum annuum OX=4072 GN=T459_21027	3	564.621	-0.7794	8.2187e-31	142.45	yes	1.038	0.978	1.022	1.008	1.006	0.947
1030	AFGEDFLGDK	A0A2G2YHV6	Protein disulfide-isomerase OS=Capsicum annuum OX=4072 GN=T459_28776	2	549.759	-1.4655	0.0074101	63.624	yes	1.024	0.911	0.986	0.939	1.145	0.994
1031	AFGHIHSPYWYEER	A0A1U8FEY8	Uncharacterized protein OS=Capsicum annuum OX=4072 GN=T459_12287	4	448.711	-0.15522	0.0039154	37.613	yes	NA	NA	NA	NA	NA	NA
1032	AFGIPVR	A0A2G2YA50	Cell division control protein 2-like protein (Fragment) OS=Capsicum annuum OX=4072 GN=T459_31052	2	380.229	0.36089	0.042623	66.994	yes	NA	NA	NA	NA	NA	NA
1033	AFGLEEK	B5LAS6	Acetyl-coenzyme A carboxylase carboxyl transferase subunit alpha OS=Capsicum annuum OX=4072 GN=T459_23141	3	265.141	0.00512	0.0082365	75.311	yes	1.067	0.938	1.104	0.909	1.095	0.888
1034	AFGMELLR	A0A1U8DS55	Lactoylglutathione lyase OS=Capsicum annuum OX=4072 GN=T459_21573	2	468.752	-0.58265	0.030201	64.265	yes	1.087	0.956	1.032	0.962	0.947	1.015
1035	AFGMELLR	A0A1U8DS55	Lactoylglutathione lyase OS=Capsicum annuum OX=4072 GN=T459_21573	2	468.752	-0.55904	0.011723	81.642	yes	1.016	0.999	0.962	0.992	1.025	1.006
1036	AFGNENFK	A0A1U8DZQ5	Peptidyl-prolyl cis-trans isomerase D OS=Capsicum annuum OX=4072 GN=T459_31717	2	463.722	-0.58819	0.006891	95.502	yes	NA	NA	NA	NA	NA	NA
1037	AFGQDLEYSWLAR	A0A1U8FCS5	Uncharacterized protein OS=Capsicum annuum OX=4072 GN=T459_02414	2	778.381	-0.64042	1.1569e-07	101.3	yes	0.908	1.016	0.949	0.993	1.138	0.996
1038	AFGQDLEYSWLAR	A0A1U8FCS5	Uncharacterized protein OS=Capsicum annuum OX=4072 GN=T459_02414	3	519.256	0.017923	6.4745e-07	98.902	yes	1.008	0.939	0.825	0.932	1.192	1.105
1039	AFHIIDQDK	A0A2G2ZI52	Caltractin (Fragment) OS=Capsicum annuum OX=4072 GN=T459_14671	3	362.857	-0.24874	0.0034089	66.692	yes	1.051	1.036	0.936	0.928	1.05	0.998
1040	AFHIIDQDK	A0A2G2ZI52	Caltractin (Fragment) OS=Capsicum annuum OX=4072 GN=T459_14671	3	362.857	-0.040208	0.0013773	77.732	yes	NA	NA	NA	NA	NA	NA
1041	AFHIMDPK	A0A2G3ACJ5	Uncharacterized protein OS=Capsicum annuum OX=4072 GN=T459_07021	3	320.165	0.57534	0.023543	45.081	yes	1.104	0.894	1.001	0.942	1.082	0.977
1042	AFIAGATAPESK	A0A1U8FM34	Uncharacterized protein OS=Capsicum annuum OX=4072 GN=T459_05980	2	581.809	0.020176	0.00017024	88.021	yes	NA	NA	NA	NA	NA	NA
1043	AFIAGATAPESK	A0A1U8FM34	Uncharacterized protein OS=Capsicum annuum OX=4072 GN=T459_05980	3	388.208	2.0844	0.048559	29.303	yes	NA	NA	NA	NA	NA	NA
1044	AFIAGVADDNGYGWAIAK	A0A2G3AHH4	Enoyl-[acyl-carrier-protein] reductase [NADH], chloroplastic OS=Capsicum annuum OX=4072 GN=T459_01577	3	613.969	-0.99368	1.3086e-18	117	yes	NA	NA	NA	NA	NA	NA
1045	AFIAGVADDNGYGWAIAK	A0A2G3AHH4	Enoyl-[acyl-carrier-protein] reductase [NADH], chloroplastic OS=Capsicum annuum OX=4072 GN=T459_01577	4	460.728	0.4412	6.0227e-06	65.374	yes	0.88	0.925	0.951	1.096	1.099	1.048
1046	AFISTEPSAEHVR	A0A1U8GC64	Uncharacterized protein OS=Capsicum annuum OX=4072 GN=T459_07289	3	481.912	-0.85369	1.6675e-13	119.55	yes	1.016	0.924	1.03	0.93	1.076	1.024
1047	AFISWIDR	A0A2G3AHI1	3-oxo-Delta(4,5)-steroid 5-beta-reductase OS=Capsicum annuum OX=4072 GN=T459_01583	2	504.269	-0.77596	0.0049836	107.57	no	0.995	0.961	0.978	1.04	1.056	0.97
1048	AFITTDINPYFDSFVR	A0A2G2XZ91	Leucine--tRNA ligase, cytoplasmic OS=Capsicum annuum OX=4072 GN=T459_33489	3	635.984	-0.15007	0.011552	34.485	yes	NA	NA	NA	NA	NA	NA
1049	AFLAQAQR	A0A2G2ZUA6	Pre-mRNA-processing factor 19-like protein 1 OS=Capsicum annuum OX=4072 GN=T459_07662	2	452.754	-1.233	0.037391	58.917	yes	NA	NA	NA	NA	NA	NA
1050	AFLAQAQR	A0A2G2ZUA6	Pre-mRNA-processing factor 19-like protein 1 OS=Capsicum annuum OX=4072 GN=T459_07662	3	302.171	-0.079962	0.0098572	57.281	yes	NA	NA	NA	NA	NA	NA
1051	AFLDATGGLWR	A0A2G2XZH4	NAD(P)H dehydrogenase (Quinone) OS=Capsicum annuum OX=4072 GN=T459_33263	3	402.88	-0.11128	0.012759	41.704	no	NA	NA	NA	NA	NA	NA
1052	AFLHVLK	A0A1U8EUZ4	Exocyst complex component SEC3A OS=Capsicum annuum OX=4072 GN=T459_30926	3	276.509	0.42482	0.015842	56.51	yes	1.056	1.004	0.954	0.94	1.174	0.871
1053	AFLNSPVGPK	A0A1U8GCA8	Mitochondrial pyruvate carrier OS=Capsicum annuum OX=4072 GN=T459_00081	3	343.862	0.39437	0.0018248	63.816	yes	0.936	0.98	1.006	0.997	1.125	0.957
1054	AFLNSPVGPK	A0A1U8GCA8	Mitochondrial pyruvate carrier OS=Capsicum annuum OX=4072 GN=T459_00081	2	515.29	-1.1246	0.00063188	87.184	yes	NA	NA	NA	NA	NA	NA
1055	AFLTTLDGSCR	A0A2G2Z6B1	Porphobilinogen deaminase, chloroplastic OS=Capsicum annuum OX=4072 GN=T459_21055	2	620.803	-1.5475	1.4408e-08	127.87	yes	1	0.922	1	1.001	1.057	1.02
1056	AFLTTLDGSCR	A0A2G2Z6B1	Porphobilinogen deaminase, chloroplastic OS=Capsicum annuum OX=4072 GN=T459_21055	3	414.205	0.050134	3.6768e-05	87.568	yes	0.998	0.95	1.074	0.987	0.876	1.116
1057	AFLVDTLALVR	A0A1U8EPS3	Uncharacterized protein OS=Capsicum annuum OX=4072 GN=T459_25279	2	609.366	-0.96379	2.9273e-21	170.89	yes	0.957	0.933	0.911	1.044	1.161	0.994
1058	AFLVDTLALVR	A0A1U8EPS3	Uncharacterized protein OS=Capsicum annuum OX=4072 GN=T459_25279	3	406.58	0.6069	0.0032884	52.49	yes	0.74	0.537	0.489	1.504	1.586	1.143
1059	AFLVEEQK	A0A1U8GY55	60S ribosomal protein L34 OS=Capsicum annuum OX=4072 GN=T459_27294	2	482.261	-0.37801	0.006891	95.502	yes	NA	NA	NA	NA	NA	NA
1060	AFLVEEQK	A0A1U8GY55	60S ribosomal protein L34 OS=Capsicum annuum OX=4072 GN=T459_27294	3	321.843	1.2214	0.028202	43.124	yes	NA	NA	NA	NA	NA	NA
1061	AFNDENVQIK	A0A1U8FTB6	Cystathionine gamma-synthase 1, chloroplastic OS=Capsicum annuum OX=4072 GN=T459_04735	2	589.296	-1.9879	0.00038695	90.05	yes	0.931	0.918	0.92	1.018	1.147	1.066
1062	AFNDENVQIK	A0A1U8FTB6	Cystathionine gamma-synthase 1, chloroplastic OS=Capsicum annuum OX=4072 GN=T459_04735	3	393.2	-0.20807	0.0023615	58.699	yes	0.893	0.95	0.828	1.116	1.072	1.142
1063	AFNPTQAEETYSMVTANR	J7H3S6	Photosystem II D2 protein OS=Capsicum annuum OX=4072 GN=psbD	3	682.646	-1.0507	5.6065e-11	79.88	yes	0.897	0.847	0.83	1.004	1.252	1.171
1064	AFNPTQAEETYSMVTANR	J7H3S6	Photosystem II D2 protein OS=Capsicum annuum OX=4072 GN=psbD	3	682.646	-1.6339	3.1211e-11	84.085	yes	1.019	0.973	0.993	0.967	1.047	1
1065	AFNPTQAEETYSMVTANR	J7H3S6	Photosystem II D2 protein OS=Capsicum annuum OX=4072 GN=psbD	3	682.646		9.5394e-12	71.909	yes	NA	NA	NA	NA	NA	NA
1066	AFNPTQAEETYSMVTANR	J7H3S6	Photosystem II D2 protein OS=Capsicum annuum OX=4072 GN=psbD	3	682.646	-0.76367	5.7446e-08	72.772	yes	NA	NA	NA	NA	NA	NA
1067	AFNPTQAEETYSMVTANR	J7H3S6	Photosystem II D2 protein OS=Capsicum annuum OX=4072 GN=psbD	3	682.646	-1.2578	0.00010442	54.355	yes	1.054	0.964	0.931	0.983	1.033	1.035
1068	AFNPTQAEETYSMVTANR	J7H3S6	Photosystem II D2 protein OS=Capsicum annuum OX=4072 GN=psbD	3	682.646	-0.54706	2.0354e-12	92.679	yes	0.997	0.952	0.937	1.054	1.052	1.008
1069	AFNPTQAEETYSMVTANR	J7H3S6	Photosystem II D2 protein OS=Capsicum annuum OX=4072 GN=psbD	3	682.646	-1.4133	2.3867e-12	91.518	yes	1.15	0.949	0.874	0.986	1.041	1
1070	AFNPTQAEETYSMVTANR	J7H3S6	Photosystem II D2 protein OS=Capsicum annuum OX=4072 GN=psbD	3	677.314	-1.6272	9.1811e-57	182.49	yes	1.058	0.946	0.936	1.006	1.006	1.048
1071	AFNPTQAEETYSMVTANR	J7H3S6	Photosystem II D2 protein OS=Capsicum annuum OX=4072 GN=psbD	2	1015.47	-1.4301	1.6329e-48	166.47	yes	1	0.992	1.061	0.872	1.04	1.036
1072	AFNPTQAEETYSMVTANR	J7H3S6	Photosystem II D2 protein OS=Capsicum annuum OX=4072 GN=psbD	3	677.314	-0.99095	1.9502e-12	95.205	yes	NA	NA	NA	NA	NA	NA
1073	AFNPTQAEETYSMVTANR	J7H3S6	Photosystem II D2 protein OS=Capsicum annuum OX=4072 GN=psbD	2	1015.47	-1.3443	2.799e-07	73.928	yes	1.056	0.913	0.94	0.902	1.198	0.99
1074	AFNPTQAEETYSMVTANR	J7H3S6	Photosystem II D2 protein OS=Capsicum annuum OX=4072 GN=psbD	3	677.314	-1.309	1.1037e-07	71.376	yes	NA	NA	NA	NA	NA	NA
1075	AFNPTQAEETYSMVTANR	J7H3S6	Photosystem II D2 protein OS=Capsicum annuum OX=4072 GN=psbD	3	677.642	-0.91657	3.9529e-12	93.371	yes	NA	NA	NA	NA	NA	NA
1076	AFPEELFSVLR	A0A2G3A119	Uncharacterized protein OS=Capsicum annuum OX=4072 GN=T459_10028	2	654.353	-0.87483	0.020865	47.361	yes	0.925	0.934	1.036	1.126	0.978	1
1077	AFPVTADNSVNFHIK	A0A1U8GHM8	Outer envelope pore protein 21, chloroplastic OS=Capsicum annuum OX=4072 GN=T459_13507	4	415.718	-0.22422	9.2171e-05	59.116	yes	NA	NA	NA	NA	NA	NA
1078	AFPVTADNSVNFHIK	A0A1U8GHM8	Outer envelope pore protein 21, chloroplastic OS=Capsicum annuum OX=4072 GN=T459_13507	3	553.954	-1.4756	1.4169e-14	113.76	yes	NA	NA	NA	NA	NA	NA
1079	AFQDCINSSGSDIGK	A0A1U8GMV8	Uncharacterized protein OS=Capsicum annuum OX=4072 GN=T459_14312	3	533.575	-1.5152	4.4356e-07	78.69	yes	1.275	1.103	1.274	0.734	0.831	0.782
1080	AFQDLDALQYR	A0A2G2XXI9	Xyloglucan endotransglucosylase/hydrolase OS=Capsicum annuum OX=4072 GN=T459_34098	2	670.336	-1.1701	3.8486e-07	105.03	yes	1.154	1.158	1.107	0.823	0.885	0.873
1081	AFQDLDALQYR	A0A2G2XXI9	Xyloglucan endotransglucosylase/hydrolase OS=Capsicum annuum OX=4072 GN=T459_34098	3	447.226	0.19377	0.00011672	82.417	yes	0.969	1.123	0.948	1.124	0.908	0.928
1082	AFQELINEGK	A0A2G2Z9B0	Uncharacterized protein OS=Capsicum annuum OX=4072 GN=T459_16632	3	383.536	0.042087	7.4606e-05	92.538	yes	1.001	0.93	0.881	1.018	1.117	1.053
1083	AFQELINEGK	A0A2G2Z9B0	Uncharacterized protein OS=Capsicum annuum OX=4072 GN=T459_16632	2	574.801	-1.5914	0.0017212	78.342	yes	0.972	0.957	1.021	0.932	1.079	1.039
1084	AFQELINEGK	A0A2G2Z9B0	Uncharacterized protein OS=Capsicum annuum OX=4072 GN=T459_16632	3	383.864	-0.17332	0.0040327	56.548	yes	NA	NA	NA	NA	NA	NA
1085	AFQILDQIPGR	A0A2G3A3T6	Alanine aminotransferase 2 OS=Capsicum annuum OX=4072 GN=T459_11000	2	629.351	-1.4064	2.1337e-08	124.12	no	0.928	0.975	0.843	0.993	1.181	1.08
1086	AFQILDQIPGR	A0A2G3A3T6	Alanine aminotransferase 2 OS=Capsicum annuum OX=4072 GN=T459_11000	3	419.903	0.0043469	0.00013845	81.017	no	0.95	0.712	0.931	1.091	1.239	1.077
1087	AFQILDQIPGR	A0A2G3A3T6	Alanine aminotransferase 2 OS=Capsicum annuum OX=4072 GN=T459_11000	3	419.903	-0.20775	1.6722e-05	89.171	no	1.008	0.92	1.095	0.827	0.934	1.216
1088	AFQTAWAAACK	A0A2G2YEK8	Uncharacterized protein OS=Capsicum annuum OX=4072 GN=T459_27661	2	612.795	-2.0231	0.013941	51.998	yes	NA	NA	NA	NA	NA	NA
1089	AFQTAWAAACK	A0A2G2YEK8	Uncharacterized protein OS=Capsicum annuum OX=4072 GN=T459_27661	3	408.866	-0.92791	0.0069833	45.653	yes	NA	NA	NA	NA	NA	NA
1090	AFQTSLPLCK	A0A1U8FWE8	Uncharacterized protein OS=Capsicum annuum OX=4072 GN=T459_06483	3	388.874	0.18824	0.0048736	52.49	yes	1.045	0.961	1.104	0.912	1.034	0.944
1091	AFQYFDK	A0A1U8GAT0	Calcium-dependent protein kinase isoform 2 OS=Capsicum annuum OX=4072 GN=T459_08476	2	459.721	-2.9035	0.04431	66.073	yes	NA	NA	NA	NA	NA	NA
1092	AFSAGGDLK	A0A2G2YT91	3-hydroxyisobutyryl-CoA hydrolase-like protein 5 OS=Capsicum annuum OX=4072 GN=T459_23728	2	433.224	-0.58315	0.0015446	94.692	yes	1.002	0.988	0.982	0.977	1.05	1.001
1093	AFSDSPIVGEIR	A0A2G3A109	Gamma-aminobutyrate transaminase 1, mitochondrial OS=Capsicum annuum OX=4072 GN=T459_10018	2	645.838	-2.0334	0.00099074	78.705	yes	1.012	0.906	0.999	0.998	1.073	1.013
1094	AFSDSPIVGEIR	A0A2G3A109	Gamma-aminobutyrate transaminase 1, mitochondrial OS=Capsicum annuum OX=4072 GN=T459_10018	3	430.894	0.08219	0.00027146	72.34	yes	0.978	0.957	1.048	0.983	1.069	0.964
1095	AFSEDTAK	A0A2G2ZX64	Ferredoxin-dependent glutamate synthase, chloroplastic OS=Capsicum annuum OX=4072 GN=T459_08652	3	290.14	0.19584	0.0087187	60.682	yes	0.973	0.95	0.954	1.077	1.117	0.93
1096	AFSELGAK	A0A1U8EGK6	Sorting nexin 1 OS=Capsicum annuum OX=4072 GN=T459_22430	3	274.817	-0.010208	0.020343	46.426	yes	NA	NA	NA	NA	NA	NA
1097	AFSGNGYER	A0A2G2XZZ3	Uncharacterized protein OS=Capsicum annuum OX=4072 GN=T459_33085	2	501.22	0.01075	0.020727	68.107	yes	0.977	0.998	0.983	0.952	1.075	1.015
1098	AFSGPIATLK	A0A1U8EMA7	4-hydroxy-4-methyl-2-oxoglutarate aldolase OS=Capsicum annuum OX=4072 GN=T459_24631	2	502.792	-1.5275	3.4509e-05	118.28	yes	1.084	1.009	1.044	0.955	0.943	0.965
1099	AFSGPIATLK	A0A1U8EMA7	4-hydroxy-4-methyl-2-oxoglutarate aldolase OS=Capsicum annuum OX=4072 GN=T459_24631	3	335.531	0.23405	0.0011972	70.056	yes	NA	NA	NA	NA	NA	NA
1100	AFSNMAVGYNNVDVEAANK	A0A2G2Y2U0	Glycerate dehydrogenase HPR, peroxisomal OS=Capsicum annuum OX=4072 GN=T459_32155	3	677.314	-1.981	2.2857e-06	63.443	yes	0.954	1.003	0.964	0.976	1.103	0.999
1101	AFSNMAVGYNNVDVEAANK	A0A2G2Y2U0	Glycerate dehydrogenase HPR, peroxisomal OS=Capsicum annuum OX=4072 GN=T459_32155	4	508.238	-0.84837	1.0758e-12	78.848	yes	0.975	0.954	1.06	0.944	1.047	1.021
1102	AFSNMAVGYNNVDVEAANK	A0A2G2Y2U0	Glycerate dehydrogenase HPR, peroxisomal OS=Capsicum annuum OX=4072 GN=T459_32155	3	677.314	-1.9411	5.3708e-05	52.814	yes	1.03	0.93	0.98	1.02	1.013	1.028
1103	AFSNMAVGYNNVDVEAANK	A0A2G2Y2U0	Glycerate dehydrogenase HPR, peroxisomal OS=Capsicum annuum OX=4072 GN=T459_32155	4	508.238	-1.0013	4.1161e-06	58.693	yes	NA	NA	NA	NA	NA	NA
1104	AFSNMAVGYNNVDVEAANK	A0A2G2Y2U0	Glycerate dehydrogenase HPR, peroxisomal OS=Capsicum annuum OX=4072 GN=T459_32155	2	1015.47	-2.13	1.3057e-05	58.693	yes	0.943	0.972	0.927	1.009	1.089	1.061
1105	AFSNMAVGYNNVDVEAANK	A0A2G2Y2U0	Glycerate dehydrogenase HPR, peroxisomal OS=Capsicum annuum OX=4072 GN=T459_32155	3	671.983	-0.80208	1.3518e-08	72.359	yes	0.956	1.02	0.985	0.948	1.079	1.011
1106	AFSNMAVGYNNVDVEAANK	A0A2G2Y2U0	Glycerate dehydrogenase HPR, peroxisomal OS=Capsicum annuum OX=4072 GN=T459_32155	4	504.239	0.32208	2.6177e-17	90.385	yes	1.015	1.06	0.965	0.998	1.015	0.946
1107	AFSNMAVGYNNVDVEAANK	A0A2G2Y2U0	Glycerate dehydrogenase HPR, peroxisomal OS=Capsicum annuum OX=4072 GN=T459_32155	2	1007.47	-0.74779	2.0985e-28	127.32	yes	0.963	1.014	0.998	1	1.069	0.956
1108	AFSNMAVGYNNVDVEAANK	A0A2G2Y2U0	Glycerate dehydrogenase HPR, peroxisomal OS=Capsicum annuum OX=4072 GN=T459_32155	3	677.642	-1.2183	1.2416e-05	58.693	yes	0.967	0.936	0.953	1.115	1.051	0.979
1109	AFSNMAVGYNNVDVEAANK	A0A2G2Y2U0	Glycerate dehydrogenase HPR, peroxisomal OS=Capsicum annuum OX=4072 GN=T459_32155	3	677.642	-1.193	2.2433e-06	66.152	yes	1.017	0.954	0.941	1.005	1.143	0.941
1110	AFSNMAVGYNNVDVEAANK	A0A2G2Y2U0	Glycerate dehydrogenase HPR, peroxisomal OS=Capsicum annuum OX=4072 GN=T459_32155	3	677.642	-1.2112	2.2433e-06	66.152	yes	0.96	0.985	0.937	1.015	1.096	1.008
1111	AFSNMAVGYNNVDVEAANK	A0A2G2Y2U0	Glycerate dehydrogenase HPR, peroxisomal OS=Capsicum annuum OX=4072 GN=T459_32155	3	672.311	-1.4738	1.9076e-08	72.359	yes	1.052	0.961	1.017	0.958	1.056	0.955
1112	AFSNMAVGYNNVDVEAANK	A0A2G2Y2U0	Glycerate dehydrogenase HPR, peroxisomal OS=Capsicum annuum OX=4072 GN=T459_32155	4	504.485	-0.32742	5.8435e-09	73.928	yes	NA	NA	NA	NA	NA	NA
1113	AFSNMAVGYNNVDVEAANK	A0A2G2Y2U0	Glycerate dehydrogenase HPR, peroxisomal OS=Capsicum annuum OX=4072 GN=T459_32155	3	672.311	-2.1212	1.8692e-06	66.152	yes	0.993	0.882	1.021	0.987	1.126	0.991
1114	AFSPTTINSGR	A0A1U8ED90	Protein transport protein Sec61 subunit alpha OS=Capsicum annuum OX=4072 GN=T459_24740	2	575.796	-1.3783	0.0071446	56.551	yes	NA	NA	NA	NA	NA	NA
1115	AFSPTTINTGR	A0A1U8FK13	Protein transport protein Sec61 subunit alpha OS=Capsicum annuum OX=4072 GN=T459_05393	2	582.804	-1.9118	0.00070996	78.548	yes	1.044	0.98	0.943	1.005	1.053	0.975
1116	AFSQVVEEAK	A0A1U8GF05	Bifunctional aspartokinase/homoserine dehydrogenase 1, chloroplastic OS=Capsicum annuum OX=4072 GN=T459_12067	2	554.288	-2.0671	0.0074101	63.624	yes	0.991	0.982	1.001	1.038	1.029	0.96
1117	AFSQVVEEAK	A0A1U8GF05	Bifunctional aspartokinase/homoserine dehydrogenase 1, chloroplastic OS=Capsicum annuum OX=4072 GN=T459_12067	3	369.861	0.34292	0.00020797	85.533	yes	1.024	1.037	1.058	0.93	1.024	0.928
1118	AFSSYQDEVLVK	A0A1U8H544	Uncharacterized protein OS=Capsicum annuum OX=4072 GN=T459_16289	3	462.57	-0.62532	0.0092001	42.031	yes	NA	NA	NA	NA	NA	NA
1119	AFSVFLFNSK	A0A1U8GRQ7	Isopentenyl-diphosphate Delta-isomerase II OS=Capsicum annuum OX=4072 GN=T459_15549	2	580.803	-0.95942	0.0022597	81.017	no	1.065	1.019	0.982	0.905	1.046	0.984
1120	AFSVFLFNSK	A0A1U8GRQ7	Isopentenyl-diphosphate Delta-isomerase II OS=Capsicum annuum OX=4072 GN=T459_15549	3	387.538	0.29561	0.0002816	85.807	no	0.969	0.837	1.065	1.006	1.125	0.997
1121	AFSVTPNGPEILLLDYPSHQR	A0A1U8EF39	Acyl-coenzyme A oxidase OS=Capsicum annuum OX=4072 GN=T459_24846	3	785.737	-0.9046	6.9275e-14	85.498	yes	0.918	0.98	0.84	1.016	1.144	1.103
1122	AFTADETSGLDLNQR	A0A2G2Z288	Isoamylase 3, chloroplastic OS=Capsicum annuum OX=4072 GN=T459_19649	2	819.392	-1.3183	7.7142e-20	124.62	yes	1.046	1.016	0.891	1.065	1.015	0.966
1123	AFTGEYWNTK	B7S5L3	Methionine-R-sulfoxide reductase B4 protein OS=Capsicum annuum OX=4072 GN=MsrB4	2	608.785	-0.81378	3.1926e-05	113.22	yes	1.021	0.968	0.973	0.959	1.124	0.954
1124	AFTGEYWNTK	B7S5L3	Methionine-R-sulfoxide reductase B4 protein OS=Capsicum annuum OX=4072 GN=MsrB4	3	406.193	0.51615	0.0031232	56.013	yes	NA	NA	NA	NA	NA	NA
1125	AFTGEYWNTK	B7S5L3	Methionine-R-sulfoxide reductase B4 protein OS=Capsicum annuum OX=4072 GN=MsrB4	2	608.785	-2.4207	0.0086849	60.598	yes	0.912	0.99	0.992	1.057	0.987	1.061
1126	AFTGEYWNTK	B7S5L3	Methionine-R-sulfoxide reductase B4 protein OS=Capsicum annuum OX=4072 GN=MsrB4	3	406.193	-0.66009	0.019335	39.937	yes	NA	NA	NA	NA	NA	NA
1127	AFTGTSER	A0A2G2YUR5	SNW domain-containing protein 1 OS=Capsicum annuum OX=4072 GN=T459_24285	2	434.712	-0.81843	0.019061	73.665	yes	NA	NA	NA	NA	NA	NA
1128	AFTLIDDSNNGFLDK	A0A1U8HHX4	Two pore calcium channel protein 1 OS=Capsicum annuum OX=4072 GN=T459_20175	3	557.602	-0.44557	3.0454e-05	67.136	yes	NA	NA	NA	NA	NA	NA
1129	AFTLIDDSNNGFLDKK	A0A1U8HHX4	Two pore calcium channel protein 1 OS=Capsicum annuum OX=4072 GN=T459_20175	3	600.3	-1.2749	0.0018924	45.614	yes	1.005	0.894	0.917	1.049	1.129	1.006
1130	AFTLIDDSNNGFLDKK	A0A1U8HHX4	Two pore calcium channel protein 1 OS=Capsicum annuum OX=4072 GN=T459_20175	4	450.477	0.3227	5.1028e-08	86.548	yes	1.03	0.887	0.91	0.978	1.152	1.043
1131	AFTNYLGENK	A0A2G2ZFA7	S-formylglutathione hydrolase OS=Capsicum annuum OX=4072 GN=T459_13695	2	578.785	-1.0855	0.00027135	93.345	yes	1.059	0.905	1.007	0.914	1.084	1.031
1132	AFVDHYYTTFDTNR	A0A2G2ZPW0	Nuclear transport factor 2 OS=Capsicum annuum OX=4072 GN=T459_12461	3	583.934	-1.1352	3.7134e-09	107.65	yes	1.05	1.034	0.96	0.913	1.083	0.959
1133	AFVEHYYSTFDTNR	A0A2G3A699	Nuclear transport factor 2 OS=Capsicum annuum OX=4072 GN=T459_04861	3	583.934	-1.4562	0.0042141	42.317	yes	NA	NA	NA	NA	NA	NA
1134	AFVGNTIGQANGVYDKPLDLR	A0A1U8FZR2	Thylakoid lumenal 17.4 kDa protein, chloroplastic OS=Capsicum annuum OX=4072 GN=T459_09644	3	750.718	-1.2723	7.3543e-46	145.77	yes	1.021	0.945	0.892	1.049	1.101	0.992
1135	AFVGNTIGQANGVYDKPLDLR	A0A1U8FZR2	Thylakoid lumenal 17.4 kDa protein, chloroplastic OS=Capsicum annuum OX=4072 GN=T459_09644	3	750.39	-1.4784	1.7413e-60	163.62	yes	1.004	1.006	0.96	1.006	1.071	0.953
1136	AFVGNTIGQANGVYDKPLDLR	A0A1U8FZR2	Thylakoid lumenal 17.4 kDa protein, chloroplastic OS=Capsicum annuum OX=4072 GN=T459_09644	3	750.39	-1.2272	1.3432e-46	150.94	yes	1.002	0.983	0.941	0.977	1.117	0.98
1137	AFVLGHSR	A0A2G2Z0D6	Peptidyl-prolyl cis-trans isomerase CYP28, chloroplastic OS=Capsicum annuum OX=4072 GN=T459_18956	3	296.168	-0.27749	0.0017116	94.114	yes	1.018	1.025	1.083	0.926	0.957	0.992
1138	AFVLGHSR	A0A2G2Z0D6	Peptidyl-prolyl cis-trans isomerase CYP28, chloroplastic OS=Capsicum annuum OX=4072 GN=T459_18956	2	443.748	-0.99317	0.0089886	85.642	yes	0.944	0.924	0.915	1.019	1.115	1.083
1139	AFVLTPEQYILK	A0A1U8DV20	Aspartic proteinase OS=Capsicum annuum OX=4072 GN=T459_33609	2	711.406	-1.419	2.637e-32	174.9	yes	1.029	0.965	0.99	0.914	1.108	0.994
1140	AFVPPQHFIR	A0A1U8GM57	Dynamin-2B OS=Capsicum annuum OX=4072 GN=T459_12130	3	404.561	-0.57827	0.0036357	54.982	yes	NA	NA	NA	NA	NA	NA
1141	AFVQVLGNEK	A0A1U8HAC6	Chloroplast stem-loop binding protein of 41 kDa b, chloroplastic OS=Capsicum annuum OX=4072 GN=T459_17973	3	369.201	-0.41739	0.0018734	68.657	yes	1.026	0.858	1.051	1.018	1.025	1.021
1142	AFVQVLGNEK	A0A1U8HAC6	Chloroplast stem-loop binding protein of 41 kDa b, chloroplastic OS=Capsicum annuum OX=4072 GN=T459_17973	2	553.298	-1.4884	0.0040597	76.228	yes	0.86	0.942	0.979	1.158	1.093	0.969
1143	AFVQVLGNEK	A0A1U8HAC6	Chloroplast stem-loop binding protein of 41 kDa b, chloroplastic OS=Capsicum annuum OX=4072 GN=T459_17973	3	369.201	-0.61337	0.0020733	67.207	yes	0.987	0.936	0.935	1.028	1.113	1
1144	AFVQVLGNEK	A0A1U8HAC6	Chloroplast stem-loop binding protein of 41 kDa b, chloroplastic OS=Capsicum annuum OX=4072 GN=T459_17973	3	368.873	0.12428	0.00020797	85.533	yes	1.079	0.849	0.96	1.034	1.127	0.951
1145	AFVQVLGNEK	A0A1U8HAC6	Chloroplast stem-loop binding protein of 41 kDa b, chloroplastic OS=Capsicum annuum OX=4072 GN=T459_17973	2	552.806	-2.3515	0.0089756	59.908	yes	0.984	0.933	0.938	1.03	1.066	1.048
1146	AFVSEYAVTGNDAGK	A0A1U8EIA9	Alpha-L-arabinofuranosidase 1 OS=Capsicum annuum OX=4072 GN=T459_26400	3	510.247	-0.55249	6.3431e-08	90.759	yes	0.994	0.956	1.02	0.972	1.114	0.945
1147	AFVSEYAVTGNDAGK	A0A1U8EIA9	Alpha-L-arabinofuranosidase 1 OS=Capsicum annuum OX=4072 GN=T459_26400	2	764.868	-1.3038	4.4355e-10	106.14	yes	1.027	1.021	0.976	0.905	1.058	1.012
1148	AFVVVSDPIVAR	A0A1U8H4M1	Cytochrome 97B3, chloroplastic OS=Capsicum annuum OX=4072 GN=T459_15893	2	636.869	-0.91072	7.5587e-12	111.63	yes	1.046	0.902	0.957	1.011	1.042	1.041
1149	AFYEEEVKR	A0A1U8FH10	V-type proton ATPase subunit OS=Capsicum annuum OX=4072 GN=T459_26353	3	390.865	-0.30693	0.0056982	56.432	yes	1.058	0.951	1.001	0.96	1.093	0.937
1150	AFYGEDYYICR	A0A2G2XUK3	Uncharacterized protein OS=Capsicum annuum OX=4072 GN=T459_34955	2	728.814	-1.7584	0.0004688	82.417	yes	0.99	0.989	0.963	1.022	1.094	0.942
1151	AFYLDPHEVQPVVDIK	A0A2G3AHQ7	Cysteine protease OS=Capsicum annuum OX=4072 GN=T459_01658	3	623.996	-1.5745	5.9552e-09	97.45	yes	NA	NA	NA	NA	NA	NA
1152	AFYLPAWCSTADYVK	A0A2G3AFP9	Tocopherol O-methyltransferase, chloroplastic OS=Capsicum annuum OX=4072 GN=T459_00941	3	597.952	-0.95905	0.00080387	50.088	yes	NA	NA	NA	NA	NA	NA
1153	AGAAAILVADDR	A0A2G2YLM2	Vacuolar-sorting receptor 1 OS=Capsicum annuum OX=4072 GN=T459_25595	2	571.812	-0.98851	0.0010327	77.744	yes	0.975	0.929	0.902	1.061	1.052	1.081
1154	AGACSSCAGK	B1PDK3	Ferredoxin OS=Capsicum annuum OX=4072 GN=T459_32413	2	484.7	-1.7485	0.0063859	66.056	yes	1.008	0.958	0.986	0.975	0.973	1.101
1155	AGADINHYDIR	A0A1U8EV97	Carboxypeptidase OS=Capsicum annuum OX=4072 GN=T459_29444	3	415.539	-0.44438	0.0010259	62.466	yes	1.078	0.925	0.942	1.009	0.994	1.052
1156	AGADVVSPSDMMDGR	A0A1U8FBG2	Delta-aminolevulinic acid dehydratase OS=Capsicum annuum OX=4072 GN=T459_01260	2	754.329	-1.9409	5.2019e-14	114.33	yes	1.094	1.015	1.04	0.939	1.042	0.87
1157	AGADYTVK	A0A1U8ENV2	Protein LHCP TRANSLOCATION DEFECT OS=Capsicum annuum OX=4072 GN=T459_24702	2	412.711	-2.5435	0.014626	77.732	yes	1.043	0.97	0.917	0.963	1.083	1.024
1158	AGAEIETIR	A0A1U8HCK2	Endothelial differentiation-related factor 1-like protein OS=Capsicum annuum OX=4072 GN=T459_20558	2	480.261	-0.73978	0.0067588	76.1	yes	1.064	1.025	0.999	0.884	0.951	1.077
1159	AGAEMLVMAYGR	A0A2G2YJ75	UDP-glucose 4,6-dehydratase OS=Capsicum annuum OX=4072 GN=T459_24745	2	634.81	-0.59821	0.00093979	79.283	no	1.031	1.007	0.905	0.992	1.056	1.009
1160	AGAEYANVPVDNCVLVSGSLPGVAGAER	A0A1U8FSC8	Uncharacterized protein OS=Capsicum annuum OX=4072 GN=T459_32280	3	924.792	-1.7816	2.4894e-05	37.196	yes	NA	NA	NA	NA	NA	NA
1161	AGAGGDEAGIWAGDLVR	A0A1U8G2X0	Peptide chain release factor 1 OS=Capsicum annuum OX=4072 GN=T459_08372	2	807.897		7.9326e-07	58.98	yes	NA	NA	NA	NA	NA	NA
1162	AGAGGPKPTFSSSTTSSNR	A0A2G2ZEA5	Uncharacterized protein OS=Capsicum annuum OX=4072 GN=T459_18389	3	603.962	-1.1534	9.1358e-05	54.103	yes	0.82	0.907	0.786	1.146	1.232	1.108
1163	AGAIILGK	A0A1U8EXS4	Uncharacterized protein OS=Capsicum annuum OX=4072 GN=T459_28442	2	371.745		0.046037	49.358	yes	NA	NA	NA	NA	NA	NA
1164	AGALGDSVTVTR	A0A1U8DUK2	60S ribosomal protein L22-2 OS=Capsicum annuum OX=4072 GN=T459_34117	2	573.809	-1.3721	3.0831e-13	126.71	no	1.058	1.027	0.987	0.918	1.062	0.949
1165	AGAPVDQTIK	A0A1U8F1N4	6-phosphogluconate dehydrogenase, decarboxylating OS=Capsicum annuum OX=4072 GN=T459_26916	2	500.277	-2.1105	2.5049e-05	124.67	yes	1.021	0.85	0.931	1.055	1.111	1.033
1166	AGAPVDQTIK	A0A1U8F1N4	6-phosphogluconate dehydrogenase, decarboxylating OS=Capsicum annuum OX=4072 GN=T459_26916	3	333.854	-0.2373	0.0081697	46.462	yes	NA	NA	NA	NA	NA	NA
1167	AGAPVGAAA	A0A1U8GZ15	Sedoheptulose-1,7-bisphosphatase, chloroplastic OS=Capsicum annuum OX=4072 GN=T459_15071	2	342.687	0.13465	0.045538	47.849	yes	1.049	1.012	0.974	0.992	0.936	1.038
1168	AGAPVGAAA	A0A1U8GZ15	Sedoheptulose-1,7-bisphosphatase, chloroplastic OS=Capsicum annuum OX=4072 GN=T459_15071	2	342.687	-0.44688	0.045538	47.849	yes	0.941	1.014	1.091	0.804	1.036	1.113
1169	AGAQVVGISGDGPESHK	A0A2G2Z1D2	Peroxiredoxin Q, chloroplastic OS=Capsicum annuum OX=4072 GN=T459_19321	3	536.937	1.9874	0.00043768	52.172	yes	1.02	1.159	0.943	1.011	0.878	0.988
1170	AGAQVVGISGDGPESHK	A0A2G2Z1D2	Peroxiredoxin Q, chloroplastic OS=Capsicum annuum OX=4072 GN=T459_19321	3	536.937	-1.7695	2.0065e-14	106.35	yes	0.996	0.994	0.974	1.029	0.997	1.009
1171	AGAQVVGISGDGPESHK	A0A2G2Z1D2	Peroxiredoxin Q, chloroplastic OS=Capsicum annuum OX=4072 GN=T459_19321	4	402.955	-0.86214	0.0025107	36.597	yes	0.874	1.17	0.883	1.15	0.888	1.034
1172	AGAQVVGISGDGPESHK	A0A2G2Z1D2	Peroxiredoxin Q, chloroplastic OS=Capsicum annuum OX=4072 GN=T459_19321	2	804.902	-1.9929	2.9386e-11	92.439	yes	1.026	0.95	0.96	1.026	1.031	1.006
1173	AGAQVVGISGDGPESHK	A0A2G2Z1D2	Peroxiredoxin Q, chloroplastic OS=Capsicum annuum OX=4072 GN=T459_19321	4	402.955	-0.76607	0.03356	24.053	yes	1.017	1.102	0.964	0.942	1.051	0.925
1174	AGAQVVGISGDGPESHK	A0A2G2Z1D2	Peroxiredoxin Q, chloroplastic OS=Capsicum annuum OX=4072 GN=T459_19321	3	536.937	-1.3732	3.9352e-11	87.429	yes	1.024	0.906	1.032	0.939	1.065	1.034
1175	AGAQVVGISGDGPESHK	A0A2G2Z1D2	Peroxiredoxin Q, chloroplastic OS=Capsicum annuum OX=4072 GN=T459_19321	4	402.955	-0.408	0.03356	24.053	yes	1.117	0.926	0.975	0.957	1.042	0.983
1176	AGATALFQDANK	A0A1U8GM42	PsbP domain-containing protein 2, chloroplastic OS=Capsicum annuum OX=4072 GN=T459_13951	3	402.875	-1.0146	0.01375	37.94	yes	NA	NA	NA	NA	NA	NA
1177	AGATALFQDANK	A0A1U8GM42	PsbP domain-containing protein 2, chloroplastic OS=Capsicum annuum OX=4072 GN=T459_13951	2	603.809		0.0054718	49.448	yes	NA	NA	NA	NA	NA	NA
1178	AGCYASNVIIQR	A0A1U8EFW0	Adenosine kinase OS=Capsicum annuum OX=4072 GN=T459_22607	3	451.231	-0.41825	1.1771e-05	94.363	no	0.838	0.944	1.174	0.916	1.2	0.928
1179	AGDGDGYFGTAPLR	A0A2G3AKI6	Protein transport protein SEC31-like protein B OS=Capsicum annuum OX=4072 GN=T459_02614	2	698.828	-1.9738	0.0083077	46.282	yes	0.934	0.951	1.034	1.047	1.1	0.933
1180	AGDLFGYPLMIK	A0A2G2Y6X3	Phosphoribosylaminoimidazole carboxylase OS=Capsicum annuum OX=4072 GN=T459_29746	3	442.237	-0.52083	0.0073661	43.68	yes	NA	NA	NA	NA	NA	NA
1181	AGDSSAEELATATQVQGPYLPITR	A0A1U8GMG9	60S ribosomal protein L13 OS=Capsicum annuum OX=4072 GN=T459_01017	3	825.75	-1.8545	6.7887e-33	108.96	yes	0.972	0.991	1.11	1.151	0.875	0.902
1182	AGEEAFLFNFK	A0A1U8FNJ7	Uncharacterized protein OS=Capsicum annuum OX=4072 GN=T459_06431	3	424.88	0.39267	0.0017799	56.548	yes	NA	NA	NA	NA	NA	NA
1183	AGEITIASHTLK	A0A1U8F4P4	Isoleucine--tRNA ligase, cytoplasmic OS=Capsicum annuum OX=4072 GN=T459_29088	3	414.235	-0.7741	0.0018853	54.343	yes	NA	NA	NA	NA	NA	NA
1184	AGEPSLIR	A0A2G2XZY5	Uncharacterized protein OS=Capsicum annuum OX=4072 GN=T459_33084	2	421.74	-0.36714	0.048849	54.776	yes	0.954	0.876	1.104	0.909	1.155	1.002
1185	AGESEYESLGVINTNPVTK	A0A2G3A1R5	Uncharacterized protein OS=Capsicum annuum OX=4072 GN=T459_10281	3	670	-1.3313	9.288e-05	52.185	yes	0.992	0.963	1.032	0.912	1.084	1.017
1186	AGEYAEYAK	A0A2G2YPI4	Uncharacterized protein OS=Capsicum annuum OX=4072 GN=T459_22447	3	334.491	-0.006159	0.0055516	56.258	yes	NA	NA	NA	NA	NA	NA
1187	AGFAGDDAPR	A0A2G2Y8W6	Actin-7 OS=Capsicum annuum OX=4072 GN=T459_30603	2	488.728	-0.77108	0.0084475	61.161	no	1.03	0.936	1.088	0.963	1.037	0.946
1188	AGFGAIGLRPSPPGYEESVEQFVR	A0A2G3AKJ8	Protoporphyrinogen oxidase, chloroplastic OS=Capsicum annuum OX=4072 GN=T459_02641	3	855.103	-0.78485	1.1771e-43	124.76	yes	1.065	1.059	1.003	0.908	1.03	0.935
1189	AGFGAIGLRPSPPGYEESVEQFVR	A0A2G3AKJ8	Protoporphyrinogen oxidase, chloroplastic OS=Capsicum annuum OX=4072 GN=T459_02641	3	855.103	-0.95463	8.3042e-09	63.869	yes	0.94	0.922	0.974	1.004	1.146	1.014
1190	AGFGGIILEDQVSPK	A0A2G2XUZ0	Uncharacterized protein OS=Capsicum annuum OX=4072 GN=T459_34867	2	765.912	-0.68974	3.8035e-15	119.96	yes	0.911	0.924	1.049	0.956	1.082	1.08
1191	AGFIHFK	A0A1U8FYP5	Carbonic anhydrase OS=Capsicum annuum OX=4072 GN=T459_06863	3	273.822		0.050791	35.105	yes	NA	NA	NA	NA	NA	NA
1192	AGFIHFK	A0A1U8FYP5	Carbonic anhydrase OS=Capsicum annuum OX=4072 GN=T459_06863	3	273.822	0.45388	0.032502	44.611	yes	NA	NA	NA	NA	NA	NA
1193	AGFIHFK	A0A1U8FYP5	Carbonic anhydrase OS=Capsicum annuum OX=4072 GN=T459_06863	3	273.822	-0.94758	0.022675	50.12	yes	1.065	0.86	1.027	0.988	1.048	1.011
1194	AGFIHFK	A0A1U8FYP5	Carbonic anhydrase OS=Capsicum annuum OX=4072 GN=T459_06863	3	273.822	-0.015642	0.032502	44.611	yes	NA	NA	NA	NA	NA	NA
1195	AGFIHFK	A0A1U8FYP5	Carbonic anhydrase OS=Capsicum annuum OX=4072 GN=T459_06863	3	273.822	0.26215	0.032502	44.611	yes	NA	NA	NA	NA	NA	NA
1196	AGFIHFK	A0A1U8FYP5	Carbonic anhydrase OS=Capsicum annuum OX=4072 GN=T459_06863	3	273.822	0.35433	0.032502	44.611	yes	0.986	0.93	1.003	1.144	0.994	0.943
1197	AGFIHFK	A0A1U8FYP5	Carbonic anhydrase OS=Capsicum annuum OX=4072 GN=T459_06863	3	273.822	0.24283	0.022675	50.12	yes	1.006	0.923	0.993	0.932	1.113	1.034
1198	AGFIHFK	A0A1U8FYP5	Carbonic anhydrase OS=Capsicum annuum OX=4072 GN=T459_06863	3	273.822	-0.26455	0.032502	44.611	yes	1.154	0.805	1.166	0.844	1.012	1.018
1199	AGFIHFK	A0A1U8FYP5	Carbonic anhydrase OS=Capsicum annuum OX=4072 GN=T459_06863	3	273.822		0.050791	35.105	yes	NA	NA	NA	NA	NA	NA
1200	AGFIHFK	A0A1U8FYP5	Carbonic anhydrase OS=Capsicum annuum OX=4072 GN=T459_06863	3	273.822	-0.3723	0.032502	44.611	yes	0.82	1.031	0.857	1.147	1.075	1.07
1201	AGFIHFK	A0A1U8FYP5	Carbonic anhydrase OS=Capsicum annuum OX=4072 GN=T459_06863	3	273.822	-1.9824	0.032502	44.611	yes	1.131	0.935	0.946	1.019	0.85	1.119
1202	AGFIHFK	A0A1U8FYP5	Carbonic anhydrase OS=Capsicum annuum OX=4072 GN=T459_06863	3	273.822	-1.071	0.012892	61.997	yes	0.547	1.256	0.517	1.481	1.073	1.127
1203	AGFTQVK	A0A1U8GPI4	2-methyl-6-phytyl-1,4-hydroquinone methyltransferase, chloroplastic OS=Capsicum annuum OX=4072 GN=T459_11065	3	250.81	-0.15477	0.0041206	88.734	yes	0.952	1.069	0.989	0.965	0.997	1.028
1204	AGGAYTLNTASAVTVR	A0A2G3AM54	60S ribosomal protein L37a OS=Capsicum annuum OX=4072 GN=T459_03180	2	776.41	-2.1876	3.0988e-14	111.73	yes	NA	NA	NA	NA	NA	NA
1205	AGGAYTLNTASAVTVR	A0A2G3AM54	60S ribosomal protein L37a OS=Capsicum annuum OX=4072 GN=T459_03180	3	517.942	-0.91733	4.6835e-06	67.846	yes	NA	NA	NA	NA	NA	NA
1206	AGGECLTFDQLALR	A0A1U8DUL4	Putative 60S ribosomal protein L18-1 OS=Capsicum annuum OX=4072 GN=T459_33707	3	517.593	0.0057786	4.2915e-05	79.089	no	NA	NA	NA	NA	NA	NA
1207	AGGECLTFDQLALR	A0A1U8DUL4	Putative 60S ribosomal protein L18-1 OS=Capsicum annuum OX=4072 GN=T459_33707	2	775.885	-1.1591	2.3561e-20	136.33	no	1.025	0.99	1.033	0.962	1.013	0.977
1208	AGGFIHAGR	A0A2G3ANS2	Uncharacterized protein OS=Capsicum annuum OX=4072 GN=T459_03769	3	295.828	0.49863	0.0046322	58.815	yes	1.26	0.988	0.922	1.102	0.964	0.765
1209	AGGFPEPELVHYNPK	A0A1U8HAC6	Chloroplast stem-loop binding protein of 41 kDa b, chloroplastic OS=Capsicum annuum OX=4072 GN=T459_17973	3	552.279	-0.96655	3.2155e-07	82.069	yes	1.099	0.925	0.987	1.021	1.023	0.946
1210	AGGFPEPELVHYNPK	A0A1U8HAC6	Chloroplast stem-loop binding protein of 41 kDa b, chloroplastic OS=Capsicum annuum OX=4072 GN=T459_17973	4	414.461	0.4355	0.0033553	36.292	yes	1.011	0.91	1.059	0.756	1.084	1.18
1211	AGGFPEPELVHYNPK	A0A1U8HAC6	Chloroplast stem-loop binding protein of 41 kDa b, chloroplastic OS=Capsicum annuum OX=4072 GN=T459_17973	2	827.915	-1.1973	0.00035882	63.185	yes	NA	NA	NA	NA	NA	NA
1212	AGGFPEPELVHYNPK	A0A1U8HAC6	Chloroplast stem-loop binding protein of 41 kDa b, chloroplastic OS=Capsicum annuum OX=4072 GN=T459_17973	3	552.279	-1.1196	0.00080387	50.088	yes	NA	NA	NA	NA	NA	NA
1213	AGGFPEPELVHYNPK	A0A1U8HAC6	Chloroplast stem-loop binding protein of 41 kDa b, chloroplastic OS=Capsicum annuum OX=4072 GN=T459_17973	4	414.461	-0.9201	0.052873	19.767	yes	NA	NA	NA	NA	NA	NA
1214	AGGFPEPELVHYNPK	A0A1U8HAC6	Chloroplast stem-loop binding protein of 41 kDa b, chloroplastic OS=Capsicum annuum OX=4072 GN=T459_17973	3	552.279	-2.4437	3.6959e-06	74.987	yes	0.962	0.906	0.995	0.982	1.131	1.023
1215	AGGIFLPLVK	A0A2G2YG16	Dicarboxylate transporter 1, chloroplastic OS=Capsicum annuum OX=4072 GN=T459_28180	3	338.883	0.80968	0.0024778	57.59	yes	0.993	1.014	0.985	0.938	1.063	1.007
1216	AGGIFLPLVK	A0A2G2YG16	Dicarboxylate transporter 1, chloroplastic OS=Capsicum annuum OX=4072 GN=T459_28180	2	507.821	-1.1755	3.6875e-05	107.57	yes	1.069	0.957	0.991	0.973	1.031	0.979
1217	AGGLGDLAELK	A0A1U8EKC1	Uncharacterized protein OS=Capsicum annuum OX=4072 GN=T459_26857	2	522.29	-0.87424	3.0729e-08	114.86	yes	1.061	0.928	0.928	1.047	1.019	1.017
1218	AGGLGDLAELK	A0A1U8EKC1	Uncharacterized protein OS=Capsicum annuum OX=4072 GN=T459_26857	3	348.529	0.96598	0.0018332	56.404	yes	NA	NA	NA	NA	NA	NA
1219	AGGLGSEVK	A0A2G2YJ01	Glutamyl-tRNA(Gln) amidotransferase subunit A, chloroplastic/mitochondrial OS=Capsicum annuum OX=4072 GN=GATA	2	409.224	-1.3403	0.025825	54.982	yes	NA	NA	NA	NA	NA	NA
1220	AGGTMTGVMSAANEK	A0A2G3A1W2	1-deoxy-D-xylulose 5-phosphate reductoisomerase, chloroplastic OS=Capsicum annuum OX=4072 GN=T459_10287	3	480.887	-1.783	0.0016009	43.69	yes	1.014	1.007	1.037	0.904	1.111	0.927
1221	AGGTMTGVMSAANEK	A0A2G3A1W2	1-deoxy-D-xylulose 5-phosphate reductoisomerase, chloroplastic OS=Capsicum annuum OX=4072 GN=T459_10287	2	712.829	-1.7077	0.01722	39.629	yes	1.109	1.031	1.108	0.836	0.929	0.987
1222	AGGVCIADEVQTGFGR	B5LAW1	Alanine--glyoxylate aminotransferase 2-like protein 1, mitochondrial OS=Capsicum annuum OX=4072 GN=T459_30335	2	818.891	-0.6642	1.1669e-07	89.911	yes	NA	NA	NA	NA	NA	NA
1223	AGGVFLPIIK	A0A2G2Y318	Dicarboxylate transporter 2.1, chloroplastic OS=Capsicum annuum OX=4072 GN=T459_32001	2	507.821	-0.57947	3.0377e-05	122.52	yes	0.994	0.927	0.998	0.911	1.069	1.101
1224	AGGVFLPIIK	A0A2G2Y318	Dicarboxylate transporter 2.1, chloroplastic OS=Capsicum annuum OX=4072 GN=T459_32001	3	338.883	1.1474	0.0073013	47.603	yes	NA	NA	NA	NA	NA	NA
1225	AGHIEDVVVDSSAR	A0A1U8E2K1	Glucosamine 6-phosphate N-acetyltransferase OS=Capsicum annuum OX=4072 GN=T459_22397	3	485.579	-0.79236	0.00034525	63.364	yes	NA	NA	NA	NA	NA	NA
1226	AGHQTSAESWGTGR	A0A2G2YQK1	60S ribosomal protein L4 OS=Capsicum annuum OX=4072 GN=T459_22817	4	361.92	-0.34431	0.00070253	52.576	yes	NA	NA	NA	NA	NA	NA
1227	AGHQTSAESWGTGR	A0A2G2YQK1	60S ribosomal protein L4 OS=Capsicum annuum OX=4072 GN=T459_22817	3	482.224	-0.049796	0.016402	33.787	yes	1.085	1.035	0.918	0.984	0.918	1.06
1228	AGIALSK	A0A1U8F1D8	Glyceraldehyde-3-phosphate dehydrogenase OS=Capsicum annuum OX=4072 GN=T459_27945	2	330.208	-1.2824	0.03997	68.915	yes	NA	NA	NA	NA	NA	NA
1229	AGIALSK	A0A1U8F1D8	Glyceraldehyde-3-phosphate dehydrogenase OS=Capsicum annuum OX=4072 GN=T459_27945	3	220.474	-0.39089	0.0098258	69.383	yes	0.957	1.002	1.001	0.885	1.125	1.029
1230	AGIFISEDPAVFR	A0A2G3AKE2	Uncharacterized protein OS=Capsicum annuum OX=4072 GN=T459_02593	2	711.375	-1.2342	3.9733e-05	92.112	yes	1.058	1.076	0.964	0.909	1.012	0.981
1231	AGIIDPLK	A0A1U8GR36	Chaperonin CPN60-2, mitochondrial OS=Capsicum annuum OX=4072 GN=T459_15223	2	413.755	0.064001	0.045487	55.676	no	1.036	0.916	0.976	1.01	1.066	0.995
1232	AGIIDPLK	A0A1U8GR36	Chaperonin CPN60-2, mitochondrial OS=Capsicum annuum OX=4072 GN=T459_15223	3	276.173	-0.52391	0.0093094	58.917	no	1.032	0.938	0.928	0.937	1.059	1.106
1233	AGIIESLDTLVK	A0A1U8DUR9	Uncharacterized protein OS=Capsicum annuum OX=4072 GN=T459_33662	3	420.247	0.28675	1.9048e-13	120.06	yes	0.976	0.926	0.857	1.09	1.149	1.002
1234	AGIIESLDTLVK	A0A1U8DUR9	Uncharacterized protein OS=Capsicum annuum OX=4072 GN=T459_33662	3	420.247	-0.15525	2.1312e-12	110.39	yes	0.985	0.894	0.978	1.041	1.081	1.02
1235	AGIIESLDTLVK	A0A1U8DUR9	Uncharacterized protein OS=Capsicum annuum OX=4072 GN=T459_33662	2	629.866	-0.97159	4.2157e-13	122.7	yes	0.927	0.924	0.936	1.091	1.191	0.931
1236	AGIPLEQYDDSYK	A0A1U8FJB8	Putative ribose-5-phosphate isomerase 4, chloroplastic OS=Capsicum annuum OX=4072 GN=T459_32302	3	500.24		0.009006	34.264	yes	NA	NA	NA	NA	NA	NA
1237	AGISNLTGVQGAVNVQGEDQK	A0A1U8EG73	Fructose-1,6-bisphosphatase, chloroplastic OS=Capsicum annuum OX=4072 GN=T459_23150	3	695.691	-0.88527	1.2384e-24	117.11	yes	0.989	0.942	0.941	1.001	1.097	1.03
1238	AGISNLTGVQGAVNVQGEDQK	A0A1U8EG73	Fructose-1,6-bisphosphatase, chloroplastic OS=Capsicum annuum OX=4072 GN=T459_23150	4	522.02	-0.3342	9.5182e-47	149.36	yes	0.98	0.846	0.842	1.06	1.116	1.156
1239	AGISNLTGVQGAVNVQGEDQK	A0A1U8EG73	Fructose-1,6-bisphosphatase, chloroplastic OS=Capsicum annuum OX=4072 GN=T459_23150	5	417.817	0.50875	0.053479	14.89	yes	NA	NA	NA	NA	NA	NA
1240	AGISNLTGVQGAVNVQGEDQK	A0A1U8EG73	Fructose-1,6-bisphosphatase, chloroplastic OS=Capsicum annuum OX=4072 GN=T459_23150	2	1043.03	-0.54642	4.299e-13	81.574	yes	0.881	0.984	1.014	0.922	1.043	1.157
1241	AGISNLTGVQGAVNVQGEDQK	A0A1U8EG73	Fructose-1,6-bisphosphatase, chloroplastic OS=Capsicum annuum OX=4072 GN=T459_23150	3	695.691	-1.6504	3.0637e-14	86.748	yes	1.01	0.948	0.855	1.003	1.111	1.073
1242	AGITVIQIDEAALR	A0A2G2YNR6	5-methyltetrahydropteroyltriglutamate--homocysteine methyltransferase OS=Capsicum annuum OX=4072 GN=T459_26355	2	735.42	-2.2119	6.9492e-05	85.909	yes	1.045	0.989	0.909	0.949	1.143	0.965
1243	AGITVIQIDEAALR	A0A2G2YNR6	5-methyltetrahydropteroyltriglutamate--homocysteine methyltransferase OS=Capsicum annuum OX=4072 GN=T459_26355	3	490.616	-1.0757	1.4671e-09	109	yes	1.075	1.011	1.181	0.848	0.984	0.901
1244	AGIVGLPNVGK	A0A2G2Z6A1	Obg-like ATPase 1 OS=Capsicum annuum OX=4072 GN=T459_21060	3	342.21	0.11893	0.0032884	52.49	yes	NA	NA	NA	NA	NA	NA
1245	AGLFGNMQNLYETVK	A0A2G2YVE2	Uncharacterized protein OS=Capsicum annuum OX=4072 GN=T459_24522	3	562.284	-0.98939	9.7959e-21	127.71	yes	0.969	0.888	0.96	1.037	1.102	1.043
1246	AGLFNEDGK	A0A2G2YZN2	Uncharacterized protein OS=Capsicum annuum OX=4072 GN=T459_18711	2	475.733		2.2216e-05	83.862	yes	NA	NA	NA	NA	NA	NA
1247	AGLGPSHWVK	A0A1U8E849	Basic secretory protease OS=Capsicum annuum OX=4072 GN=T459_32189	3	351.194	0.57427	0.00122	69.812	yes	NA	NA	NA	NA	NA	NA
1248	AGLGPSHWVKPGQGDR	A0A1U8E849	Basic secretory protease OS=Capsicum annuum OX=4072 GN=T459_32189	3	554.622	-1.5844	2.4354e-06	74.966	yes	0.894	0.847	0.908	1.024	1.237	1.09
1249	AGLLDINGQIYAAQGK	A0A1U8ESC0	Malate dehydrogenase [NADP], chloroplastic OS=Capsicum annuum OX=4072 GN=T459_31834	3	544.958	-0.76758	1.0767e-07	85.909	yes	NA	NA	NA	NA	NA	NA
1250	AGLLDINGQIYAAQGK	A0A1U8ESC0	Malate dehydrogenase [NADP], chloroplastic OS=Capsicum annuum OX=4072 GN=T459_31834	2	816.933	-0.83184	2.7382e-30	147.12	yes	0.997	0.96	1.031	0.926	1.116	0.97
1251	AGLLDINGQIYAAQGK	A0A1U8ESC0	Malate dehydrogenase [NADP], chloroplastic OS=Capsicum annuum OX=4072 GN=T459_31834	3	544.958	-1.0462	0.0010144	49.988	yes	NA	NA	NA	NA	NA	NA
1252	AGLLSAAEK	A0A1U8G5N3	Uncharacterized protein OS=Capsicum annuum OX=4072 GN=T459_10435	2	430.248	0.35771	0.0024158	86.898	yes	0.984	0.99	0.984	1.003	1.053	0.986
1253	AGLLSAAEK	A0A1U8G5N3	Uncharacterized protein OS=Capsicum annuum OX=4072 GN=T459_10435	3	287.168	1.8531	0.00061924	86.67	yes	1.011	0.965	0.977	0.962	1.123	0.963
1254	AGLLSAAEK	A0A1U8G5N3	Uncharacterized protein OS=Capsicum annuum OX=4072 GN=T459_10435	2	430.248	0.46057	0.001391	98.048	yes	1.041	0.967	1.012	0.973	1.009	0.997
1255	AGLLSAAEK	A0A1U8G5N3	Uncharacterized protein OS=Capsicum annuum OX=4072 GN=T459_10435	3	287.168	1.5742	0.00038892	94.309	yes	1.009	0.946	0.935	1.078	0.986	1.046
1256	AGLQFPVGR	A0A2G2ZXN4	Histone H2A (Fragment) OS=Capsicum annuum OX=4072 GN=T459_08835	2	472.769	0.10144	0.035682	51.415	no	NA	NA	NA	NA	NA	NA
1257	AGLQFPVGR	A0A2G2ZXN4	Histone H2A (Fragment) OS=Capsicum annuum OX=4072 GN=T459_08835	3	315.515	-0.38197	0.00022651	106.36	no	1.046	1.005	1.037	0.94	1.055	0.917
1258	AGLQFPVGR	A0A2G2ZXN4	Histone H2A (Fragment) OS=Capsicum annuum OX=4072 GN=T459_08835	2	472.769	-1.4129	0.018271	59.35	no	1.181	1.01	1.093	0.828	1.039	0.848
1259	AGLQLTEAQK	A0A1U8EU58	Uncharacterized protein OS=Capsicum annuum OX=4072 GN=T459_30138	2	529.796	-1.675	0.0013917	81.017	yes	0.919	0.968	1.019	0.959	1.127	1.008
1260	AGLVFNPYGGR	A0A2G2Z0L1	Reticuline oxidase-like protein OS=Capsicum annuum OX=4072 GN=T459_19035	2	575.804	-1.5035	0.014781	51.436	yes	NA	NA	NA	NA	NA	NA
1261	AGLYMHLR	A0A1U8E8Z4	Beta-galactosidase OS=Capsicum annuum OX=4072 GN=T459_34213	3	320.841	0.59789	0.0093423	58.819	yes	NA	NA	NA	NA	NA	NA
1263	AGMIQNAIK	A0A1U8EVD4	Pentatricopeptide repeat-containing protein, mitochondrial OS=Capsicum annuum OX=4072 GN=T459_27140	2	481.26	-2.6328	0.035638	42.599	yes	1.054	0.933	0.958	0.969	1.092	0.995
1264	AGMTHIVR	A0A1U8DVW7	60S ribosomal protein L3 OS=Capsicum annuum OX=4072 GN=T459_33859	3	300.829	-0.45114	0.014955	45.335	no	1.201	1.14	1.064	0.795	1.006	0.794
1265	AGMTHIVR	A0A1U8DVW7	60S ribosomal protein L3 OS=Capsicum annuum OX=4072 GN=T459_33859	3	295.497	-0.54789	0.0017132	94.662	no	NA	NA	NA	NA	NA	NA
1266	AGMTHIVR	A0A1U8DVW7	60S ribosomal protein L3 OS=Capsicum annuum OX=4072 GN=T459_33859	2	442.742	-1.157	0.026295	67.169	no	NA	NA	NA	NA	NA	NA
1267	AGMVPLQMELGGK	A0A2G2Z009	NADP-dependent glyceraldehyde-3-phosphate dehydrogenase (Fragment) OS=Capsicum annuum OX=4072 GN=T459_18879	2	673.844		0.0015225	43.405	yes	NA	NA	NA	NA	NA	NA
1268	AGMVPLQMELGGK	A0A2G2Z009	NADP-dependent glyceraldehyde-3-phosphate dehydrogenase (Fragment) OS=Capsicum annuum OX=4072 GN=T459_18879	3	444.233	-0.64726	0.0095374	37.236	yes	NA	NA	NA	NA	NA	NA
1269	AGNASLEEVVMALK	B5LAV3	2-isopropylmalate synthase B OS=Capsicum annuum OX=4072 GN=T459_16615	3	478.25	-0.23399	0.001239	55.724	yes	1.007	1.129	1.069	0.952	0.977	0.865
1270	AGNASLEEVVMALK	B5LAV3	2-isopropylmalate synthase B OS=Capsicum annuum OX=4072 GN=T459_16615	3	477.922	-0.2492	0.00011033	67.234	yes	1.113	0.92	1.026	0.961	1.001	0.978
1271	AGNASLEEVVMALK	B5LAV3	2-isopropylmalate synthase B OS=Capsicum annuum OX=4072 GN=T459_16615	2	716.379	-1.7197	3.2879e-08	104.95	yes	1.108	1.014	1.011	0.835	1.04	0.993
1272	AGNDTEVLWNDAR	A0A1U8E9Z5	Eukaryotic translation initiation factor 3 subunit B OS=Capsicum annuum OX=4072 GN=T459_03147	2	730.842	-1.821	0.010259	48.131	yes	NA	NA	NA	NA	NA	NA
1273	AGNLSSAANFAR	A0A2G2Z2H7	Coatomer subunit alpha OS=Capsicum annuum OX=4072 GN=T459_19754	2	589.799	-0.26452	0.02652	44.366	yes	NA	NA	NA	NA	NA	NA
1274	AGNVQPYTFILPPTWK	A0A1U8GUS7	PsbP domain-containing protein 6, chloroplastic OS=Capsicum annuum OX=4072 GN=T459_17173	3	611.33	-1.2959	1.8289e-08	93.424	yes	0.969	0.934	0.949	1.086	1.066	0.996
1275	AGPGAAISPSELAAQLPTK	A0A1U8G682	Caffeic acid 3-O-methyltransferase OS=Capsicum annuum OX=4072 GN=T459_09715	3	593.66	-1.5545	4.7196e-13	86.367	yes	0.979	0.866	0.91	1.051	1.095	1.099
1276	AGPGAAISPSELAAQLPTK	A0A1U8G682	Caffeic acid 3-O-methyltransferase OS=Capsicum annuum OX=4072 GN=T459_09715	4	445.497	-0.60519	0.014913	27.271	yes	NA	NA	NA	NA	NA	NA
1277	AGPGAAISPSELAAQLPTK	A0A1U8G682	Caffeic acid 3-O-methyltransferase OS=Capsicum annuum OX=4072 GN=T459_09715	3	593.66	-1.0084	1.8967e-12	78.95	yes	0.964	0.996	1.056	0.96	1.029	0.995
1278	AGPGILGVNLGK	A0A1U8E220	Dihydroorotate dehydrogenase (quinone), mitochondrial OS=Capsicum annuum OX=4072 GN=T459_21139	2	548.33	-1.0187	0.001078	73.499	yes	0.989	0.954	0.979	1.011	1.049	1.018
1279	AGPGILGVNLGK	A0A1U8E220	Dihydroorotate dehydrogenase (quinone), mitochondrial OS=Capsicum annuum OX=4072 GN=T459_21139	3	365.889	0.495	0.00031653	67.334	yes	1.011	0.874	0.909	1.019	1.16	1.028
1280	AGPGTIAEAMIR	A0A1U8EP93	Putative monogalactosyldiacylglycerol synthase, chloroplastic OS=Capsicum annuum OX=4072 GN=T459_31619	2	593.816	-1.261	0.0019296	65.179	yes	NA	NA	NA	NA	NA	NA
1281	AGPHAAVVK	A0A1U8FI50	Uncharacterized protein OS=Capsicum annuum OX=4072 GN=T459_04622	3	283.836	-1.174	0.0037858	64.265	yes	NA	NA	NA	NA	NA	NA
1282	AGPHAAVVR	A0A2G2XZ91	Leucine--tRNA ligase, cytoplasmic OS=Capsicum annuum OX=4072 GN=T459_33489	3	293.172	0.21017	0.00025063	104.75	yes	1.021	0.949	1.05	0.934	1.105	0.941
1283	AGPHAAVVR	A0A2G2XZ91	Leucine--tRNA ligase, cytoplasmic OS=Capsicum annuum OX=4072 GN=T459_33489	2	439.254	-0.83868	0.010215	71.501	yes	NA	NA	NA	NA	NA	NA
1284	AGPISHGASSPDSLLK	A0A2G2ZA69	Ubiquitin carboxyl-terminal hydrolase OS=Capsicum annuum OX=4072 GN=T459_16959	3	512.939	-0.040994	0.038707	27.263	yes	NA	NA	NA	NA	NA	NA
1285	AGPNNEIFDPEANLPVK	A0A2G2YRS0	Phosphoinositide phospholipase C OS=Capsicum annuum OX=4072 GN=T459_23224	3	608.976	-1.6671	2.0304e-10	79.346	yes	0.974	0.945	0.986	1.033	1.07	0.993
1286	AGPNNEIFDPEANLPVK	A0A2G2YRS0	Phosphoinositide phospholipase C OS=Capsicum annuum OX=4072 GN=T459_23224	4	456.984	-0.37836	0.0041287	35.473	yes	NA	NA	NA	NA	NA	NA
1287	AGPSATLPEQVK	A0A2G2ZVE7	Photosystem II D1 processing protein PSB27-H2, chloroplastic OS=Capsicum annuum OX=4072 GN=T459_08037	2	599.327	-2.6614	0.00092139	79.492	yes	0.997	0.936	0.961	0.914	1.19	1.002
1288	AGPSATLPEQVK	A0A2G2ZVE7	Photosystem II D1 processing protein PSB27-H2, chloroplastic OS=Capsicum annuum OX=4072 GN=T459_08037	3	399.887	-0.36551	0.00028156	68.536	yes	NA	NA	NA	NA	NA	NA
1289	AGQEALANVFR	A0A2G2ZRN5	Succinate dehydrogenase subunit 5, mitochondrial OS=Capsicum annuum OX=4072 GN=T459_13092	2	588.312	-1.0383	6.8361e-05	88.987	yes	NA	NA	NA	NA	NA	NA
1290	AGQESHAALTEFDR	A0A1U8DVW7	60S ribosomal protein L3 OS=Capsicum annuum OX=4072 GN=T459_33859	3	511.243	-0.62496	1.6307e-06	96.673	yes	0.918	1.014	0.921	0.978	0.995	1.173
1291	AGQESHAALTEFDR	A0A1U8DVW7	60S ribosomal protein L3 OS=Capsicum annuum OX=4072 GN=T459_33859	3	511.243	-0.41694	3.4056e-05	81.448	yes	1.159	0.933	1.054	0.877	0.99	0.987
1292	AGQESHAALTEFDR	A0A1U8DVW7	60S ribosomal protein L3 OS=Capsicum annuum OX=4072 GN=T459_33859	2	766.36	-1.9121	2.4136e-12	113.4	yes	1.033	1.136	1.133	0.895	0.977	0.825
1293	AGQGAFGNMCR	A0A2G2YQK1	60S ribosomal protein L4 OS=Capsicum annuum OX=4072 GN=T459_22817	2	584.753	-2.2101	0.00055608	81.017	yes	1.02	0.985	1.041	0.938	1.017	0.999
1294	AGQHDEPVHAAAVR	A0A2G2Y834	Calmodulin-binding transcription activator 3 (Fragment) OS=Capsicum annuum OX=4072 GN=T459_30350	4	365.187	-0.43001	2.3965e-19	126.1	yes	0.762	0.489	0.74	1.293	1.138	1.579
1295	AGQNGYHHR	A0A1U8DVW7	60S ribosomal protein L3 OS=Capsicum annuum OX=4072 GN=T459_33859	3	347.493	0.009394	0.030193	41.876	no	0.868	0.595	1.038	1.226	1.108	1.166
1296	AGQNGYHHR	A0A1U8DVW7	60S ribosomal protein L3 OS=Capsicum annuum OX=4072 GN=T459_33859	3	347.493	-0.18954	0.00046582	99.442	no	0.627	0.625	0.835	1.291	1.224	1.397
1297	AGQPECQYYLK	A0A1U8EV01	Zinc finger CCCH domain-containing protein 33 OS=Capsicum annuum OX=4072 GN=T459_29401	2	678.816	-1.4941	0.0053688	59.198	yes	1.027	1.001	1.035	0.933	1.033	0.971
1298	AGQPHAEVFALR	A0A2G2YXQ8	Riboflavin biosynthesis protein PYRD, chloroplastic OS=Capsicum annuum OX=4072 GN=T459_21780	3	432.567	0.12266	0.003905	47.039	yes	NA	NA	NA	NA	NA	NA
1299	AGRPIPIPNSGMQITQLGHVK	A0A1U8HAC6	Chloroplast stem-loop binding protein of 41 kDa b, chloroplastic OS=Capsicum annuum OX=4072 GN=T459_17973	5	447.045	0.12978	0.00064585	42.118	yes	0.953	0.963	0.968	1.058	1.081	0.977
1300	AGSAASLSSLLNR	A0A2G2YEX8	Alpha-glucan water dikinase, chloroplastic OS=Capsicum annuum OX=4072 GN=T459_27784	2	623.841	-1.7653	5.164e-12	112.82	yes	0.984	0.9	0.979	1.069	1.022	1.046
1301	AGSAASLSSLLNR	A0A2G2YEX8	Alpha-glucan water dikinase, chloroplastic OS=Capsicum annuum OX=4072 GN=T459_27784	3	416.23	-0.46208	0.0010742	58.04	yes	NA	NA	NA	NA	NA	NA
1302	AGSCSSCAGK	A0A1U8DVL9	Ferredoxin OS=Capsicum annuum OX=4072 GN=T459_32412	2	492.697	-1.6233	5.6217e-05	100.88	yes	0.991	0.929	0.996	0.931	1.072	1.081
1303	AGSCSSCAGK	A0A1U8DVL9	Ferredoxin OS=Capsicum annuum OX=4072 GN=T459_32412	2	492.697	-2.8793	0.023837	50.353	yes	0.953	0.937	1.046	1.001	1.106	0.957
1304	AGSCSSCAGK	A0A1U8DVL9	Ferredoxin OS=Capsicum annuum OX=4072 GN=T459_32412	3	328.801	-0.63033	0.00092979	72.928	yes	NA	NA	NA	NA	NA	NA
1305	AGSMDNGDGIAVGWLGHPIFR	A0A2G2YFA9	Photosystem II CP47 reaction center protein OS=Capsicum annuum OX=4072 GN=T459_27897	3	729.681	-1.6103	1.1662e-13	84.159	no	1.029	0.921	0.985	0.937	1.093	1.034
1306	AGSMDNGDGIAVGWLGHPIFR	A0A2G2YFA9	Photosystem II CP47 reaction center protein OS=Capsicum annuum OX=4072 GN=T459_27897	4	547.513	-0.47167	7.0151e-07	59.351	no	NA	NA	NA	NA	NA	NA
1307	AGSMDNGDGIAVGWLGHPIFR	A0A2G2YFA9	Photosystem II CP47 reaction center protein OS=Capsicum annuum OX=4072 GN=T459_27897	2	1094.02	-1.5609	1.1696e-09	77.554	no	0.953	1.093	1.046	1.026	1.002	0.88
1308	AGSMDNGDGIAVGWLGHPIFR	A0A2G2YFA9	Photosystem II CP47 reaction center protein OS=Capsicum annuum OX=4072 GN=T459_27897	3	729.681	-1.9573	1.6186e-14	88.176	no	1.029	0.946	1.034	1.077	1.017	0.897
1309	AGSMDNGDGIAVGWLGHPIFR	A0A2G2YFA9	Photosystem II CP47 reaction center protein OS=Capsicum annuum OX=4072 GN=T459_27897	3	729.681	-1.2645	1.6585e-20	105.91	no	0.94	0.947	1.002	1.012	1.04	1.06
1310	AGSMDNGDGIAVGWLGHPIFR	A0A2G2YFA9	Photosystem II CP47 reaction center protein OS=Capsicum annuum OX=4072 GN=T459_27897	3	729.681	-0.82046	8.2137e-30	126.4	no	0.899	1.021	0.916	1.058	0.953	1.154
1311	AGSMDNGDGIAVGWLGHPIFR	A0A2G2YFA9	Photosystem II CP47 reaction center protein OS=Capsicum annuum OX=4072 GN=T459_27897	4	547.513	0.42931	3.4696e-05	53.768	no	0.985	1.016	1.087	1.055	1.015	0.843
1312	AGSMDNGDGIAVGWLGHPIFR	A0A2G2YFA9	Photosystem II CP47 reaction center protein OS=Capsicum annuum OX=4072 GN=T459_27897	2	1094.02	-0.070785	3.3443e-09	76.176	no	0.969	1.003	1.018	0.924	1.091	0.995
1313	AGSMDNGDGIAVGWLGHPIFR	A0A2G2YFA9	Photosystem II CP47 reaction center protein OS=Capsicum annuum OX=4072 GN=T459_27897	3	729.681	-1.004	1.6007e-29	122.1	no	0.98	0.96	0.932	1.054	1.062	1.012
1314	AGSMDNGDGIAVGWLGHPIFR	A0A2G2YFA9	Photosystem II CP47 reaction center protein OS=Capsicum annuum OX=4072 GN=T459_27897	3	724.349	-0.94145	2.7166e-20	102.07	no	1.041	0.963	1.008	0.974	1.081	0.934
1315	AGSMDNGDGIAVGWLGHPIFR	A0A2G2YFA9	Photosystem II CP47 reaction center protein OS=Capsicum annuum OX=4072 GN=T459_27897	2	1086.02	-1.6077	3.62e-06	60.561	no	0.982	1.092	0.857	0.957	1.063	1.049
1316	AGSMDNGDGIAVGWLGHPIFR	A0A2G2YFA9	Photosystem II CP47 reaction center protein OS=Capsicum annuum OX=4072 GN=T459_27897	4	543.514	-1.0955	1.3211e-18	93.371	no	1.07	0.932	0.948	0.892	1.134	1.024
1317	AGSMDNGDGIAVGWLGHPIFR	A0A2G2YFA9	Photosystem II CP47 reaction center protein OS=Capsicum annuum OX=4072 GN=T459_27897	3	724.349	-0.93	2.0973e-07	65.855	no	NA	NA	NA	NA	NA	NA
1318	AGSMDNGDGIAVGWLGHPIFR	A0A2G2YFA9	Photosystem II CP47 reaction center protein OS=Capsicum annuum OX=4072 GN=T459_27897	4	543.514	-0.48155	2.9388e-07	61.276	no	NA	NA	NA	NA	NA	NA
1319	AGSMDNGDGIAVGWLGHPIFR	A0A2G2YFA9	Photosystem II CP47 reaction center protein OS=Capsicum annuum OX=4072 GN=T459_27897	3	729.353	-1.4114	0.00024674	45.157	no	1.068	0.941	0.91	1.055	0.998	1.027
1320	AGSMDNGDGIAVGWLGHPIFR	A0A2G2YFA9	Photosystem II CP47 reaction center protein OS=Capsicum annuum OX=4072 GN=T459_27897	3	729.353	-0.94145	1.2044e-18	94.45	no	1.076	1.026	1.07	1.043	0.822	0.964
1321	AGSMDNGDGIAVGWLGHPIFR	A0A2G2YFA9	Photosystem II CP47 reaction center protein OS=Capsicum annuum OX=4072 GN=T459_27897	3	729.353	-2.7907	5.8895e-30	122.49	no	1.007	0.92	0.978	0.932	1.114	1.049
1322	AGSMDNGDGIAVGWLGHPIFR	A0A2G2YFA9	Photosystem II CP47 reaction center protein OS=Capsicum annuum OX=4072 GN=T459_27897	3	724.021	-1.6237	0.00057939	44.054	no	NA	NA	NA	NA	NA	NA
1323	AGSVFDNILICDDPDYAK	A0A2G2XV13	Calreticulin OS=Capsicum annuum OX=4072 GN=T459_34864	3	671.647	-1.1567	1.7214e-08	77.221	yes	0.917	0.873	0.859	1.083	1.178	1.089
1324	AGTIIPR	A0A1U8EB09	Putative glucan 1,3-alpha-glucosidase OS=Capsicum annuum OX=4072 GN=T459_03186	2	364.227	-0.33764	0.052579	61.561	yes	1.01	1.045	1.026	0.945	1.006	0.968
1325	AGVELLPR	A0A1U8FLX2	Uncharacterized protein OS=Capsicum annuum OX=4072 GN=T459_06058	2	427.758	-0.38314	0.035293	60.478	yes	NA	NA	NA	NA	NA	NA
1326	AGVGCLVGSCR	A0A1U8F3A9	Putative mannitol dehydrogenase OS=Capsicum annuum OX=4072 GN=T459_34734	2	568.271	-1.0001	0.026549	45.908	yes	NA	NA	NA	NA	NA	NA
1327	AGVIFCSISEAIK	A0A2G3A971	UPF0051 protein OS=Capsicum annuum OX=4072 GN=T459_05836	3	465.583	-0.32438	0.0010619	58.172	yes	NA	NA	NA	NA	NA	NA
1328	AGVIPISHR	A0A1U8EXS4	Uncharacterized protein OS=Capsicum annuum OX=4072 GN=T459_28442	3	317.191	0.29156	0.0020193	74.301	no	1.195	1.031	0.947	1.087	0.909	0.83
1329	AGVIPISHR	A0A1U8EXS4	Uncharacterized protein OS=Capsicum annuum OX=4072 GN=T459_28442	2	475.283	-0.59707	0.019157	57.931	no	1.072	0.921	0.864	0.969	1.07	1.105
1330	AGVIQECK	A0A2G3A661	30S ribosomal protein S21, chloroplastic OS=Capsicum annuum OX=4072 GN=T459_04840	2	452.731	-2.4044	0.017692	74.92	no	NA	NA	NA	NA	NA	NA
1331	AGVLDIDK	A0A1U8FJU2	Uncharacterized protein OS=Capsicum annuum OX=4072 GN=T459_05200	2	415.735	-1.4948	0.02535	67.897	yes	1.017	0.995	1.019	0.989	1.018	0.963
1332	AGVLGLIEK	A0A1U8FJW5	Uncharacterized protein OS=Capsicum annuum OX=4072 GN=T459_05332	3	300.524	0.35718	0.042933	34.253	yes	NA	NA	NA	NA	NA	NA
1333	AGVPLLEIVSEPDMR	A0A2G2ZU60	Glutamyl-tRNA(Gln) amidotransferase subunit B, chloroplastic/mitochondrial OS=Capsicum annuum OX=4072 GN=GATB	3	547.955	-0.27018	0.0011549	45.207	yes	NA	NA	NA	NA	NA	NA
1334	AGVPLLEIVSEPDMR	A0A2G2ZU60	Glutamyl-tRNA(Gln) amidotransferase subunit B, chloroplastic/mitochondrial OS=Capsicum annuum OX=4072 GN=GATB	3	542.624	-0.37928	2.152e-08	96.464	yes	0.979	1.028	0.867	1.053	1.039	1.034
1335	AGVQFYTQIK	A0A2G2Y3D1	Methylmalonate-semialdehyde dehydrogenase [acylating], mitochondrial OS=Capsicum annuum OX=4072 GN=T459_31943	2	577.814	-1.5919	0.0098273	57.885	yes	NA	NA	NA	NA	NA	NA
1336	AGVQFYTQIK	A0A2G2Y3D1	Methylmalonate-semialdehyde dehydrogenase [acylating], mitochondrial OS=Capsicum annuum OX=4072 GN=T459_31943	3	385.545	-0.11611	0.004247	53.751	yes	NA	NA	NA	NA	NA	NA
1337	AGVSDLGAAQELAR	A0A1U8H5Z0	Uncharacterized protein OS=Capsicum annuum OX=4072 GN=T459_16161	2	679.357	-2.3522	0.03002	36.292	yes	1.087	0.963	0.904	0.97	1.106	0.971
1338	AGVSDLGAAQELAR	A0A1U8H5Z0	Uncharacterized protein OS=Capsicum annuum OX=4072 GN=T459_16161	3	453.241	-0.47005	5.3794e-23	147.33	yes	1.008	0.99	1.031	0.895	1.112	0.963
1339	AGVTHILK	A0A1U8FV75	Histidinol dehydrogenase, chloroplastic OS=Capsicum annuum OX=4072 GN=T459_05413	3	280.176	-2.4652	0.0098572	57.281	yes	NA	NA	NA	NA	NA	NA
1340	AGVTHILK	A0A1U8FV75	Histidinol dehydrogenase, chloroplastic OS=Capsicum annuum OX=4072 GN=T459_05413	3	280.176	-0.42546	0.0086925	60.76	yes	NA	NA	NA	NA	NA	NA
1341	AGWGVMTSHR	A0A2G2YPT6	Enolase OS=Capsicum annuum OX=4072 GN=T459_22470	3	367.847	-0.38077	0.0076907	46.819	yes	NA	NA	NA	NA	NA	NA
1342	AGWNSAAYR	A0A2G2Z2M4	Uncharacterized protein OS=Capsicum annuum OX=4072 GN=T459_19673	2	498.238	-0.24789	0.036066	51.276	yes	0.997	0.917	0.901	0.925	1.185	1.075
1343	AGYAPSDYHSESEWK	A0A2G2YZ83	Glutathione synthetase OS=Capsicum annuum OX=4072 GN=T459_22335	3	576.25	-1.7549	1.9611e-06	76.759	yes	0.889	0.91	1.036	1.127	1.107	0.932
1344	AGYEVAVHDINHDVMK	A0A1U8FBY0	3-hydroxyisobutyrate dehydrogenase OS=Capsicum annuum OX=4072 GN=T459_04456	4	450.22	-0.75807	0.00065892	46.318	yes	NA	NA	NA	NA	NA	NA
1345	AGYFDLDGTVIR	A0A1U8ELY2	4-coumarate--CoA ligase-like 7 OS=Capsicum annuum OX=4072 GN=T459_28675	3	442.894	1.2854	0.0074499	43.604	yes	1.002	0.974	0.846	0.972	1.049	1.157
1346	AHAESVNLQFEKPLDEDTAR	A0A2G2YVY9	Aspartate-semialdehyde dehydrogenase OS=Capsicum annuum OX=4072 GN=T459_21215	4	568.282	-0.70829	3.2315e-06	57.366	yes	0.955	0.999	1.031	1.017	1.012	0.986
1347	AHAESVNLQFEKPLDEDTAR	A0A2G2YVY9	Aspartate-semialdehyde dehydrogenase OS=Capsicum annuum OX=4072 GN=T459_21215	3	757.373	-1.3028	2.9143e-06	63.302	yes	1.038	1.082	1.014	0.877	1.027	0.963
1348	AHASTEGVTK	A0A2G2Z688	Phosphoglycerate kinase OS=Capsicum annuum OX=4072 GN=T459_21042	3	334.173	-0.040146	0.00020797	85.533	yes	NA	NA	NA	NA	NA	NA
1349	AHASTEGVTK	A0A2G2Z688	Phosphoglycerate kinase OS=Capsicum annuum OX=4072 GN=T459_21042	2	500.757	-1.6555	1.6765e-05	128.01	yes	0.549	0.645	0.615	1.308	1.434	1.449
1350	AHDQQPYLVYSPVEK	A0A1U8HC38	GEM-like protein 5 OS=Capsicum annuum OX=4072 GN=T459_02312	3	591.965	-2.2074	0.00010872	62.055	yes	NA	NA	NA	NA	NA	NA
1351	AHDTAQVSSDASEATASK	A0A2G2YPI4	Uncharacterized protein OS=Capsicum annuum OX=4072 GN=T459_22447	3	592.606	-2.4034	5.8743e-24	120.82	yes	0.827	0.856	0.954	1.163	1.039	1.161
1352	AHDVDHGLNLEK	A0A2G2YXI5	K(+) efflux antiporter 1, chloroplastic OS=Capsicum annuum OX=4072 GN=T459_21757	3	449.893	-0.18175	7.3491e-14	127.17	yes	1.014	0.968	0.976	0.993	1.08	0.97
1353	AHDVDHGLNLEK	A0A2G2YXI5	K(+) efflux antiporter 1, chloroplastic OS=Capsicum annuum OX=4072 GN=T459_21757	4	337.672	0.015432	0.00032491	64.121	yes	1.05	1.036	1.021	0.939	1.087	0.867
1354	AHEAEQSILNR	A0A1U8GM57	Dynamin-2B OS=Capsicum annuum OX=4072 GN=T459_12130	3	423.218	-0.24215	7.8453e-05	84.882	yes	NA	NA	NA	NA	NA	NA
1355	AHEAEQSILNR	A0A1U8GM57	Dynamin-2B OS=Capsicum annuum OX=4072 GN=T459_12130	2	634.323	-1.6366	0.0023581	67.08	yes	0.914	1.051	0.903	0.988	1.113	1.031
1356	AHEAWEEILLTPGEHFLVVTHK	A0A2G3A8K4	Uncharacterized protein OS=Capsicum annuum OX=4072 GN=T459_05643	5	512.071	-0.086287	2.2912e-11	71.148	yes	1.052	0.922	0.933	0.974	1.148	0.972
1357	AHEEVPTPK	A0A2G2YG20	Uncharacterized protein OS=Capsicum annuum OX=4072 GN=T459_28157	3	336.51	-0.30524	0.012598	46.462	yes	NA	NA	NA	NA	NA	NA
1358	AHELEGEVSK	A0A1U8HC81	Uncharacterized protein OS=Capsicum annuum OX=4072 GN=T459_20411	3	366.852	-0.73206	0.00030355	82.417	yes	NA	NA	NA	NA	NA	NA
1359	AHELLYLGTVYGLYPGLHTK	A0A2G3AFE9	Pentatricopeptide repeat-containing protein, chloroplastic OS=Capsicum annuum OX=4072 GN=T459_00836	4	562.056	-0.64698	0.0091669	29.603	yes	NA	NA	NA	NA	NA	NA
1360	AHELSTLK	A0A2G2ZD36	LL-diaminopimelate aminotransferase, chloroplastic OS=Capsicum annuum OX=4072 GN=T459_17975	3	300.171	0.3489	0.026573	43.808	no	1.041	1.079	1.067	0.918	0.988	0.907
1361	AHELSTLK	A0A2G2ZD36	LL-diaminopimelate aminotransferase, chloroplastic OS=Capsicum annuum OX=4072 GN=T459_17975	2	449.753	-1.0516	0.006891	95.502	no	1.056	1.071	1.102	0.877	1.006	0.887
1362	AHEMVMQEVR	A0A1U8G5J6	Chaperone protein ClpB1 OS=Capsicum annuum OX=4072 GN=T459_10363	3	421.194	-0.41508	0.0031422	51.276	yes	0.745	0.594	0.583	1.274	1.408	1.395
1363	AHEMVMQEVR	A0A1U8G5J6	Chaperone protein ClpB1 OS=Capsicum annuum OX=4072 GN=T459_10363	3	421.194	0.24104	0.0077842	43.308	yes	0.876	0.368	0.764	1.235	1.428	1.329
1364	AHEMVMQEVR	A0A1U8G5J6	Chaperone protein ClpB1 OS=Capsicum annuum OX=4072 GN=T459_10363	3	421.194	-1.0065	0.0013395	58.955	yes	0.783	0.661	0.417	1.235	1.526	1.378
1365	AHEMVMQEVR	A0A1U8G5J6	Chaperone protein ClpB1 OS=Capsicum annuum OX=4072 GN=T459_10363	3	415.862	-0.22141	0.00096428	67.113	yes	NA	NA	NA	NA	NA	NA
1366	AHEMVMQEVR	A0A1U8G5J6	Chaperone protein ClpB1 OS=Capsicum annuum OX=4072 GN=T459_10363	3	410.53	-0.37172	0.0022183	60.064	yes	NA	NA	NA	NA	NA	NA
1367	AHEMVMQEVR	A0A1U8G5J6	Chaperone protein ClpB1 OS=Capsicum annuum OX=4072 GN=T459_10363	2	615.292	-1.5147	0.0021037	77.288	yes	NA	NA	NA	NA	NA	NA
1368	AHEWNYR	A0A1U8G8C0	Photosynthetic NDH subunit of subcomplex B 3, chloroplastic OS=Capsicum annuum OX=4072 GN=T459_10370	3	325.819	0.8965	0.0088456	73.039	yes	0.973	0.99	0.789	0.997	1.238	1.014
1369	AHEWNYR	A0A1U8G8C0	Photosynthetic NDH subunit of subcomplex B 3, chloroplastic OS=Capsicum annuum OX=4072 GN=T459_10370	3	326.147	-0.4972	0.013847	69.432	yes	NA	NA	NA	NA	NA	NA
1370	AHEWNYR	A0A1U8G8C0	Photosynthetic NDH subunit of subcomplex B 3, chloroplastic OS=Capsicum annuum OX=4072 GN=T459_10370	3	326.147	-0.49435	0.028129	52.683	yes	NA	NA	NA	NA	NA	NA
1371	AHFETETTR	A0A2G2ZCC9	Eukaryotic peptide chain release factor GTP-binding subunit ERF3B (Fragment) OS=Capsicum annuum OX=4072 GN=T459_17587	3	364.509	-0.36884	0.00041465	92.051	yes	0.994	0.892	1.005	0.925	1.116	1.068
1372	AHFETETTR	A0A2G2ZCC9	Eukaryotic peptide chain release factor GTP-binding subunit ERF3B (Fragment) OS=Capsicum annuum OX=4072 GN=T459_17587	2	546.259	-1.2432	0.013241	67.414	yes	0.996	0.984	1.003	1.026	1.01	0.981
1373	AHFTAPSSER	A0A1U8FHZ3	60S ribosomal protein L26 OS=Capsicum annuum OX=4072 GN=T459_04546	3	368.181	-0.12884	0.002929	56.404	yes	0.984	1.035	1.024	0.894	0.878	1.184
1374	AHFTAPSSVR	A0A1U8FNZ6	60S ribosomal protein L26 OS=Capsicum annuum OX=4072 GN=T459_06606	3	358.189	-0.8651	0.0022075	60.167	yes	NA	NA	NA	NA	NA	NA
1375	AHGEGDLGTQALVLALER	A0A2G2Y0S4	Putative 3-hydroxyisobutyrate dehydrogenase-like 1, mitochondrial OS=Capsicum annuum OX=4072 GN=T459_32980	4	463.25	-0.42789	2.5097e-05	57.525	yes	NA	NA	NA	NA	NA	NA
1376	AHGGFSVFAGVGER	A0A2G2ZI24	ATP synthase subunit beta OS=Capsicum annuum OX=4072 GN=T459_14641	3	464.234	-0.27113	0.00018498	66.004	no	0.907	1.076	0.899	0.947	0.991	1.18
1377	AHGGFSVFAGVGER	A0A2G2ZI24	ATP synthase subunit beta OS=Capsicum annuum OX=4072 GN=T459_14641	3	464.234	0.51482	1.8704e-05	85.536	no	0.967	0.973	0.918	1.014	1.008	1.12
1378	AHGGFSVFAGVGER	A0A2G2ZI24	ATP synthase subunit beta OS=Capsicum annuum OX=4072 GN=T459_14641	3	464.234	-0.05055	0.00018498	66.004	no	NA	NA	NA	NA	NA	NA
1379	AHGGLAR	A0A1U8DVK6	40S ribosomal protein S12 OS=Capsicum annuum OX=4072 GN=T459_32428	2	341.193	-0.29328	0.05178	61.997	yes	0.661	0.694	0.667	1.229	1.404	1.344
1380	AHGGVSVFGGVGER	J7H6W5	ATP synthase subunit beta, chloroplastic OS=Capsicum annuum OX=4072 GN=atpB	3	443.562	-0.51779	0.00035636	63.181	no	NA	NA	NA	NA	NA	NA
1381	AHGGVSVFGGVGER	J7H6W5	ATP synthase subunit beta, chloroplastic OS=Capsicum annuum OX=4072 GN=atpB	3	443.562	-0.62263	0.0013914	50.897	no	NA	NA	NA	NA	NA	NA
1382	AHGGVSVFGGVGER	J7H6W5	ATP synthase subunit beta, chloroplastic OS=Capsicum annuum OX=4072 GN=atpB	3	443.562	-1.0079	0.036806	28.277	no	NA	NA	NA	NA	NA	NA
1383	AHGGVSVFGGVGER	J7H6W5	ATP synthase subunit beta, chloroplastic OS=Capsicum annuum OX=4072 GN=atpB	2	664.839	-1.3861	0.0052344	51.726	no	1.025	0.951	1.002	0.952	0.924	1.145
1384	AHGGVSVFGGVGER	J7H6W5	ATP synthase subunit beta, chloroplastic OS=Capsicum annuum OX=4072 GN=atpB	3	443.562	0.57562	0.0015614	49.298	no	0.84	0.982	0.849	1.368	0.823	1.139
1385	AHGGVSVFGGVGER	J7H6W5	ATP synthase subunit beta, chloroplastic OS=Capsicum annuum OX=4072 GN=atpB	3	443.562	-0.60428	7.7322e-05	67.997	no	0.975	0.984	0.854	0.944	1.207	1.035
1386	AHGGVSVFGGVGER	J7H6W5	ATP synthase subunit beta, chloroplastic OS=Capsicum annuum OX=4072 GN=atpB	3	443.562	-0.24411	3.9748e-06	92.781	no	0.995	1.029	0.953	1.016	1.162	0.846
1387	AHGGVSVFGGVGER	J7H6W5	ATP synthase subunit beta, chloroplastic OS=Capsicum annuum OX=4072 GN=atpB	3	443.562	-0.7861	0.00022921	65.276	no	1.072	0.926	0.944	1.032	1.001	1.024
1388	AHGGVSVFGGVGER	J7H6W5	ATP synthase subunit beta, chloroplastic OS=Capsicum annuum OX=4072 GN=atpB	3	443.562	-0.074495	0.00093419	55.196	no	1.179	0.899	0.947	1.115	1.039	0.822
1389	AHGGVSVFGGVGER	J7H6W5	ATP synthase subunit beta, chloroplastic OS=Capsicum annuum OX=4072 GN=atpB	3	443.562	0.31314	0.00038355	62.732	no	0.95	1.017	1.054	0.94	1.018	1.023
1390	AHGGVSVFGGVGER	J7H6W5	ATP synthase subunit beta, chloroplastic OS=Capsicum annuum OX=4072 GN=atpB	3	443.562	0.23033	0.0015614	49.298	no	0.994	0.977	0.93	0.988	1.046	1.065
1391	AHGGVSVFGGVGER	J7H6W5	ATP synthase subunit beta, chloroplastic OS=Capsicum annuum OX=4072 GN=atpB	3	443.562	-0.47193	0.00059628	59.227	no	NA	NA	NA	NA	NA	NA
1392	AHGLAPEIPEDLYHLIK	A0A1U8FF28	40S ribosomal protein S13 OS=Capsicum annuum OX=4072 GN=T459_25380	4	479.762	-0.59983	7.6324e-06	66.246	yes	1.16	1.086	1.016	0.738	1.062	0.938
1393	AHGLAPEIPEDLYHLIK	A0A1U8FF28	40S ribosomal protein S13 OS=Capsicum annuum OX=4072 GN=T459_25380	5	384.011	0.19928	3.6379e-05	58.885	yes	1.048	1.057	1.002	0.894	1.066	0.932
1394	AHGLAPEIPEDLYHLIK	A0A1U8FF28	40S ribosomal protein S13 OS=Capsicum annuum OX=4072 GN=T459_25380	4	479.762	-0.83109	0.011826	31.914	yes	1.072	0.706	1.375	0.939	0.933	0.976
1395	AHGNAVGLPTEDDMGNSEVGHNALGAGR	A0A1U8HA96	2,3-bisphosphoglycerate-independent phosphoglycerate mutase OS=Capsicum annuum OX=4072 GN=T459_19505	4	691.319	-2.0532	5.4296e-16	72.082	yes	1.231	1.054	1.059	0.804	0.923	0.929
1396	AHGNAVGLPTEDDMGNSEVGHNALGAGR	A0A1U8HA96	2,3-bisphosphoglycerate-independent phosphoglycerate mutase OS=Capsicum annuum OX=4072 GN=T459_19505	4	691.319	-1.7726	6.8161e-22	81.315	yes	0.927	0.826	0.815	1.163	1.121	1.147
1397	AHGNAVGLPTEDDMGNSEVGHNALGAGR	A0A1U8HA96	2,3-bisphosphoglycerate-independent phosphoglycerate mutase OS=Capsicum annuum OX=4072 GN=T459_19505	4	687.32	-1.3439	1.022e-60	132.84	yes	0.995	0.915	1.012	1.06	1.068	0.95
1398	AHGNPGGPAPPINNLK	A0A1U8E901	Zinc finger CCCH domain-containing protein 14 OS=Capsicum annuum OX=4072 GN=T459_26464	4	389.21	-0.4511	0.045519	21.666	yes	NA	NA	NA	NA	NA	NA
1399	AHGPLPAPPQDEFDK	A0A2G3AEJ8	Monocopper oxidase-like protein SKS2 OS=Capsicum annuum OX=4072 GN=T459_00543	4	405.452	-0.99352	0.0014038	43.761	yes	1.029	0.976	1.051	0.957	0.988	0.999
1400	AHGPYVNGQNICSVDLSLAPK	A0A089FZ95	Dehydroascorbate reductase OS=Capsicum annuum OX=4072 GN=DHAR	3	747.704	-0.15197	2.4291e-20	102.89	yes	1.206	1.023	1.045	0.816	1.013	0.897
1401	AHGPYVNGQNICSVDLSLAPK	A0A089FZ95	Dehydroascorbate reductase OS=Capsicum annuum OX=4072 GN=DHAR	4	561.03	0.18535	7.9313e-05	46.494	yes	0.96	1.029	0.957	0.991	1.021	1.041
1402	AHGPYVNGQNICSVDLSLAPK	A0A089FZ95	Dehydroascorbate reductase OS=Capsicum annuum OX=4072 GN=DHAR	5	449.025	1.3463	0.00064392	40.432	yes	NA	NA	NA	NA	NA	NA
1403	AHHEIEELGLHEGAGLAEVVK	A0A2G2YXI1	Malic enzyme OS=Capsicum annuum OX=4072 GN=T459_21744	4	560.293	-1.0904	5.3415e-05	47.082	yes	1.025	0.958	0.996	0.983	1.051	0.987
1404	AHHFDSK	A0A1U8EFR8	50S ribosomal protein L5, chloroplastic OS=Capsicum annuum OX=4072 GN=T459_33194	3	281.137	-0.46676	0.023489	49.358	yes	NA	NA	NA	NA	NA	NA
1405	AHIEIDTEAAR	A0A2G2Z636	65-kDa microtubule-associated protein 1 OS=Capsicum annuum OX=4072 GN=T459_20847	3	409.211	0.207	0.0086073	44.543	yes	NA	NA	NA	NA	NA	NA
1406	AHIQDYISTHYGAHR	A0A2G2YD43	Mitochondrial-processing peptidase subunit beta OS=Capsicum annuum OX=4072 GN=T459_27152	4	442.968	-0.35932	0.0057613	35.037	yes	1.014	0.891	1.072	1.018	1.023	0.982
1407	AHIQDYISTHYGAHR	A0A2G2YD43	Mitochondrial-processing peptidase subunit beta OS=Capsicum annuum OX=4072 GN=T459_27152	3	590.289	-1.5938	0.0048528	38.376	yes	0.928	0.9	0.963	1.152	1.095	0.963
1408	AHIQDYISTHYGAHR	A0A2G2YD43	Mitochondrial-processing peptidase subunit beta OS=Capsicum annuum OX=4072 GN=T459_27152	5	354.576	-0.14488	0.00038845	50.088	yes	1.642	0.919	0.543	0.783	1.101	1.011
1409	AHLEALEEK	A0A1U8ELT9	Uncharacterized protein OS=Capsicum annuum OX=4072 GN=T459_27729	3	347.185	0.020503	0.00069675	85.676	yes	NA	NA	NA	NA	NA	NA
1410	AHLEALEEK	A0A1U8ELT9	Uncharacterized protein OS=Capsicum annuum OX=4072 GN=T459_27729	2	520.275	-1.6874	0.00056184	127.76	yes	1.092	1.035	1.019	0.902	1.016	0.937
1411	AHLLFDFHQEIDGLR	A0A2G2YNP0	Adenylosuccinate synthetase, chloroplastic OS=Capsicum annuum OX=4072 GN=PURA	4	453.486	0.60573	0.01762	29.324	no	NA	NA	NA	NA	NA	NA
1412	AHLLQALADAK	A0A2G2Z636	65-kDa microtubule-associated protein 1 OS=Capsicum annuum OX=4072 GN=T459_20847	3	384.224	1.4337	0.00037813	72.2	yes	NA	NA	NA	NA	NA	NA
1413	AHLLSIGR	A0A2G3AL86	Uncharacterized protein OS=Capsicum annuum OX=4072 GN=T459_02887	3	289.512	-0.035554	0.0071887	65.252	yes	0.898	0.976	1.139	1.002	0.81	1.174
1414	AHLMEIQVNGGNVAQK	A0A1U8DVF8	60S ribosomal protein L3 OS=Capsicum annuum OX=4072 GN=T459_32459	3	575.958	-1.3333	1.8582e-07	83.692	yes	1.127	0.985	1.019	0.86	0.982	1.026
1415	AHLMEIQVNGGNVAQK	A0A1U8DVF8	60S ribosomal protein L3 OS=Capsicum annuum OX=4072 GN=T459_32459	3	570.626	-1.0849	1.6975e-10	100.11	yes	1.115	0.955	0.984	0.928	0.995	1.024
1416	AHLMEIQVNGGTIAQK	A0A1U8DVW7	60S ribosomal protein L3 OS=Capsicum annuum OX=4072 GN=T459_33859	3	576.298	-2.9223	5.768e-15	116.58	yes	0.971	0.955	1.059	0.936	1.092	0.988
1417	AHLMEIQVNGGTIAQK	A0A1U8DVW7	60S ribosomal protein L3 OS=Capsicum annuum OX=4072 GN=T459_33859	3	576.298	-0.69536	1.0555e-14	113.4	yes	1.044	1.054	1.01	0.929	1.057	0.906
1418	AHLMEIQVNGGTIAQK	A0A1U8DVW7	60S ribosomal protein L3 OS=Capsicum annuum OX=4072 GN=T459_33859	3	570.966	-1.5333	9.264e-11	104.55	yes	1.05	1.06	0.98	0.939	1.001	0.97
1419	AHLMEIQVNGGTIAQK	A0A1U8DVW7	60S ribosomal protein L3 OS=Capsicum annuum OX=4072 GN=T459_33859	4	428.477	-0.71335	0.0019261	40.941	yes	NA	NA	NA	NA	NA	NA
1420	AHLSCAAGQK	A0A2G2XXC6	Beta-galactosidase OS=Capsicum annuum OX=4072 GN=T459_33981	3	348.175	-0.94131	0.0015644	66.299	yes	NA	NA	NA	NA	NA	NA
1421	AHMMTDGFNSCR	A0A2G2YEZ3	Putative alanine aminotransferase, mitochondrial OS=Capsicum annuum OX=4072 GN=T459_27803	3	486.857	-0.89291	2.1556e-05	88.24	yes	1.034	1.013	0.935	0.943	1.085	0.99
1422	AHMMTDGFNSCR	A0A2G2YEZ3	Putative alanine aminotransferase, mitochondrial OS=Capsicum annuum OX=4072 GN=T459_27803	3	486.857	-0.74729	2.2627e-05	88.155	yes	0.878	1.013	0.976	0.893	1.232	1.008
1423	AHMMTDGFNSCR	A0A2G2YEZ3	Putative alanine aminotransferase, mitochondrial OS=Capsicum annuum OX=4072 GN=T459_27803	3	486.857	-0.56042	7.1853e-09	107.11	yes	1.034	0.881	1.001	1.148	0.932	1.004
1424	AHMMTDGFNSCR	A0A2G2YEZ3	Putative alanine aminotransferase, mitochondrial OS=Capsicum annuum OX=4072 GN=T459_27803	3	486.857	-0.85244	5.061e-06	95.618	yes	0.924	1.027	1.056	0.764	1.147	1.082
1425	AHMMTDGFNSCR	A0A2G2YEZ3	Putative alanine aminotransferase, mitochondrial OS=Capsicum annuum OX=4072 GN=T459_27803	3	486.857	-0.75338	1.3626e-05	89.266	yes	1.053	0.966	0.972	0.883	1.109	1.018
1426	AHMMTDGFNSCR	A0A2G2YEZ3	Putative alanine aminotransferase, mitochondrial OS=Capsicum annuum OX=4072 GN=T459_27803	3	481.525	-0.26233	1.1975e-12	111.86	yes	0.929	0.846	1.125	1.17	0.91	1.02
1427	AHMMTDGFNSCR	A0A2G2YEZ3	Putative alanine aminotransferase, mitochondrial OS=Capsicum annuum OX=4072 GN=T459_27803	3	481.525	-0.84892	7.3383e-05	84.821	yes	0.997	0.938	1.05	1.004	0.996	1.014
1428	AHMMTDGFNSCR	A0A2G2YEZ3	Putative alanine aminotransferase, mitochondrial OS=Capsicum annuum OX=4072 GN=T459_27803	3	481.525	-0.9556	1.3802e-08	105.2	yes	NA	NA	NA	NA	NA	NA
1429	AHMMTDGFNSCR	A0A2G2YEZ3	Putative alanine aminotransferase, mitochondrial OS=Capsicum annuum OX=4072 GN=T459_27803	3	481.525	-0.67285	0.0059981	42.031	yes	NA	NA	NA	NA	NA	NA
1430	AHMMTDGFNSCR	A0A2G2YEZ3	Putative alanine aminotransferase, mitochondrial OS=Capsicum annuum OX=4072 GN=T459_27803	3	487.185	-0.69899	0.00017497	79.036	yes	1.193	0.926	0.876	0.812	1.245	0.947
1431	AHMMTDGFNSCR	A0A2G2YEZ3	Putative alanine aminotransferase, mitochondrial OS=Capsicum annuum OX=4072 GN=T459_27803	3	487.185	-0.60616	1.7758e-05	89.032	yes	0.974	0.88	1.198	1.034	0.945	0.969
1432	AHMMTDGFNSCR	A0A2G2YEZ3	Putative alanine aminotransferase, mitochondrial OS=Capsicum annuum OX=4072 GN=T459_27803	3	487.185	-0.62956	1.6331e-08	104.94	yes	0.958	0.991	0.954	1.03	1.027	1.041
1433	AHMMTDGFNSCR	A0A2G2YEZ3	Putative alanine aminotransferase, mitochondrial OS=Capsicum annuum OX=4072 GN=T459_27803	3	481.853	-0.74388	0.00020329	84.479	yes	NA	NA	NA	NA	NA	NA
1434	AHMMTDGFNSCR	A0A2G2YEZ3	Putative alanine aminotransferase, mitochondrial OS=Capsicum annuum OX=4072 GN=T459_27803	3	481.853	-0.86437	0.00047086	69.864	yes	NA	NA	NA	NA	NA	NA
1435	AHMMTDGFNSCR	A0A2G2YEZ3	Putative alanine aminotransferase, mitochondrial OS=Capsicum annuum OX=4072 GN=T459_27803	3	481.853	-1.1184	0.00045973	72.34	yes	0.908	1.082	1.004	0.947	1.091	0.967
1436	AHMMTDGFNSCR	A0A2G2YEZ3	Putative alanine aminotransferase, mitochondrial OS=Capsicum annuum OX=4072 GN=T459_27803	3	476.194	-0.54524	0.00039771	66.267	yes	1.29	1.051	1.069	1.023	0.77	0.797
1437	AHMMTDGFNSCR	A0A2G2YEZ3	Putative alanine aminotransferase, mitochondrial OS=Capsicum annuum OX=4072 GN=T459_27803	2	713.787	-1.8608	0.0044266	57.175	yes	1.048	0.956	1.029	0.894	1.002	1.071
1438	AHMMTDGFNSCR	A0A2G2YEZ3	Putative alanine aminotransferase, mitochondrial OS=Capsicum annuum OX=4072 GN=T459_27803	3	476.522	-0.38727	5.7205e-09	108.98	yes	NA	NA	NA	NA	NA	NA
1439	AHMQTFIDK	A0A1U8G267	ABC transporter F family member 3 OS=Capsicum annuum OX=4072 GN=T459_00060	3	364.183	-1.2254	0.0022762	72.928	yes	NA	NA	NA	NA	NA	NA
1440	AHNISGVFPHLVK	A0A1U8FIR3	Chloride channel protein OS=Capsicum annuum OX=4072 GN=T459_04839	4	355.453	0.30487	0.0038679	41.242	yes	NA	NA	NA	NA	NA	NA
1441	AHNLVFK	A0A1U8GM57	Dynamin-2B OS=Capsicum annuum OX=4072 GN=T459_12130	3	276.829	-1.0228	0.02177	50.966	yes	0.941	0.913	0.948	0.933	1.235	1.031
1442	AHPALSDMER	A0A1U8FWX7	BTB/POZ domain-containing protein OS=Capsicum annuum OX=4072 GN=T459_06592	3	376.182	-0.20705	0.03867	33.875	yes	0.917	0.887	1.006	1.015	1.158	1.017
1443	AHPDNSAEAIQGSNISR	A0A1U8EM24	Uncharacterized protein OS=Capsicum annuum OX=4072 GN=T459_26861	3	589.619	-0.93645	0.00025913	54.768	yes	1.048	1.006	0.778	1.511	1.157	0.5
1444	AHPDVFNMMLQILEDGR	A0A2G3A2X5	Chaperone protein ClpC1, chloroplastic OS=Capsicum annuum OX=4072 GN=T459_10684	3	673.321	-1.4494	1.2111e-10	78.95	no	NA	NA	NA	NA	NA	NA
1445	AHPEYVK	A0A1U8EWA6	Carboxypeptidase OS=Capsicum annuum OX=4072 GN=T459_28685	3	281.817	-0.40515	0.019934	52.683	yes	1.232	0.936	0.95	1.095	0.906	0.88
1446	AHPEYVK	A0A1U8EWA6	Carboxypeptidase OS=Capsicum annuum OX=4072 GN=T459_28685	2	422.222	-1.9118	0.03997	68.915	yes	1.086	1.014	0.896	1.054	1.051	0.899
1447	AHPHLDEIER	A0A2G3A4M7	Root phototropism protein 2 OS=Capsicum annuum OX=4072 GN=T459_04254	4	304.907	1.3242	0.012376	38.75	yes	NA	NA	NA	NA	NA	NA
1448	AHPQELK	A0A2G3AES2	Diaminopimelate decarboxylase 2, chloroplastic OS=Capsicum annuum OX=4072 GN=T459_00606	3	274.82	0.069247	0.013444	60.788	yes	NA	NA	NA	NA	NA	NA
1449	AHPQELK	A0A2G3AES2	Diaminopimelate decarboxylase 2, chloroplastic OS=Capsicum annuum OX=4072 GN=T459_00606	3	274.82	-0.39737	0.012565	62.714	yes	NA	NA	NA	NA	NA	NA
1450	AHQAPFR	A0A2G3A0D2	Uncharacterized protein OS=Capsicum annuum OX=4072 GN=T459_09784	3	276.149	0.1047	0.024129	48.761	yes	NA	NA	NA	NA	NA	NA
1451	AHQLVMEGFNWCQDK	A0A1U8GDF9	Serine/threonine-protein phosphatase OS=Capsicum annuum OX=4072 GN=T459_02209	3	621.943	-1.9447	0.0055101	40.477	yes	0.986	0.963	0.95	1.085	0.986	1.03
1452	AHQLVMEGFNWCQDK	A0A1U8GDF9	Serine/threonine-protein phosphatase OS=Capsicum annuum OX=4072 GN=T459_02209	3	621.615	-0.97594	3.0315e-07	82.578	yes	0.963	1.05	1.027	0.917	1.008	1.035
1453	AHQLVMEGYNWSHEQK	A0A1U8EGY9	Serine/threonine-protein phosphatase OS=Capsicum annuum OX=4072 GN=T459_03034	4	489.981	-0.57921	9.8824e-08	79.652	yes	0.955	1.01	0.996	1.007	1.025	1.008
1454	AHQLVMEGYNWSHEQK	A0A1U8EGY9	Serine/threonine-protein phosphatase OS=Capsicum annuum OX=4072 GN=T459_03034	3	652.972	-1.7156	5.8409e-11	105.14	yes	0.959	0.932	0.971	1.035	1.008	1.095
1455	AHQLVQEGLK	A0A1U8HAQ4	Serine/threonine-protein phosphatase OS=Capsicum annuum OX=4072 GN=T459_17866	3	374.88	-0.51027	1.4761e-05	99.815	yes	1.015	0.998	1.03	0.901	1.033	1.023
1456	AHQVVEDGYEFFAER	A0A1U8HBG4	Serine/threonine-protein phosphatase OS=Capsicum annuum OX=4072 GN=T459_18282	3	599.613	-0.86165	0.0027909	42.947	yes	NA	NA	NA	NA	NA	NA
1457	AHQVVEDGYEFFANR	A0A1U8GR53	Serine/threonine-protein phosphatase OS=Capsicum annuum OX=4072 GN=T459_34149	3	594.613	-2.3127	0.0045733	38.995	yes	1.033	0.908	0.972	0.928	1.086	1.074
1458	AHRPGIPGQELAITSDEALSLEELPK	A0A2G2ZTR4	Glutathione reductase, cytosolic OS=Capsicum annuum OX=4072 GN=T459_07473	4	693.62	-2.3472	2.282e-15	78.098	yes	NA	NA	NA	NA	NA	NA
1459	AHRPGIPGQELAITSDEALSLEELPK	A0A2G2ZTR4	Glutathione reductase, cytosolic OS=Capsicum annuum OX=4072 GN=T459_07473	4	693.62	-1.3981	2.2616e-09	59.359	yes	NA	NA	NA	NA	NA	NA
1460	AHSIYYR	A0A1U8GJE2	Dolichyl-diphosphooligosaccharide--protein glycosyltransferase subunit 1 OS=Capsicum annuum OX=4072 GN=T459_13506	3	303.824	1.062	0.0064561	81.381	yes	NA	NA	NA	NA	NA	NA
1461	AHSIYYR	A0A1U8GJE2	Dolichyl-diphosphooligosaccharide--protein glycosyltransferase subunit 1 OS=Capsicum annuum OX=4072 GN=T459_13506	3	303.824	-0.43636	0.0084703	74.439	yes	NA	NA	NA	NA	NA	NA
1462	AHTDAGGIILLFQDDK	A0A1U8FN87	1-aminocyclopropane-1-carboxylate oxidase OS=Capsicum annuum OX=4072 GN=T459_04250	3	571.965	-1.0569	3.7242e-28	132.08	no	1.152	1.275	1.142	0.822	0.791	0.818
1463	AHTDAGGIILLFQDDK	A0A1U8FN87	1-aminocyclopropane-1-carboxylate oxidase OS=Capsicum annuum OX=4072 GN=T459_04250	4	429.226	0.095049	2.2794e-05	65.038	no	1.147	1.216	1.197	0.793	0.783	0.864
1464	AHTDAGGIILLFQDDK	A0A1U8FN87	1-aminocyclopropane-1-carboxylate oxidase OS=Capsicum annuum OX=4072 GN=T459_04250	3	571.965	-0.84298	2.4706e-34	153.14	no	1.286	1.179	1.223	0.755	0.809	0.748
1465	AHTDAGGIILLFQDDK	A0A1U8FN87	1-aminocyclopropane-1-carboxylate oxidase OS=Capsicum annuum OX=4072 GN=T459_04250	4	429.226	0.46161	2.3605e-06	69.261	no	1.407	1.239	1.274	0.624	0.818	0.638
1466	AHTDAGGIILLFQDDK	A0A1U8FN87	1-aminocyclopropane-1-carboxylate oxidase OS=Capsicum annuum OX=4072 GN=T459_04250	2	857.444	-0.96827	7.851e-34	155.1	no	1.219	1.246	1.214	0.758	0.819	0.744
1467	AHTDAGGIILLFQDDK	A0A1U8FN87	1-aminocyclopropane-1-carboxylate oxidase OS=Capsicum annuum OX=4072 GN=T459_04250	3	571.965	-0.86764	0.0014879	45.438	no	0.921	1.046	1.024	0.99	1.004	1.016
1468	AHTDAGGIVLLFQDDK	A0A1U8FEU9	1-aminocyclopropane-1-carboxylate oxidase 1 OS=Capsicum annuum OX=4072 GN=T459_19927	3	567.293	-0.70519	7.3952e-11	103.88	yes	0.413	0.404	0.426	1.629	1.635	1.494
1469	AHTDWVTAIATPIDNSDMIVTSSR	A0A1U8FJH9	Guanine nucleotide-binding protein subunit beta-like protein OS=Capsicum annuum OX=4072 GN=T459_17586	3	873.09	-0.71804	3.2944e-32	103.02	no	0.806	0.966	1.073	1.074	1.085	0.995
1470	AHTDWVTAIATPIDNSDMIVTSSR	A0A1U8FJH9	Guanine nucleotide-binding protein subunit beta-like protein OS=Capsicum annuum OX=4072 GN=T459_17586	3	873.09	-2.9278	1.1946e-38	111.53	no	0.973	0.866	1.019	0.99	1.062	1.09
1471	AHTDWVTAIATPIDNSDMIVTSSR	A0A1U8FJH9	Guanine nucleotide-binding protein subunit beta-like protein OS=Capsicum annuum OX=4072 GN=T459_17586	3	867.759	-0.84034	3.7344e-32	104.81	no	0.913	0.849	0.984	1.121	1.107	1.026
1472	AHTDWVTAIATPIDNSDMIVTSSR	A0A1U8FJH9	Guanine nucleotide-binding protein subunit beta-like protein OS=Capsicum annuum OX=4072 GN=T459_17586	4	651.071	-0.39912	6.2127e-19	81.696	no	1.012	0.929	0.989	0.947	1.062	1.061
1473	AHVDDINNTHLR	A0A2G2ZXC6	Glucose-6-phosphate isomerase OS=Capsicum annuum OX=4072 GN=T459_08743	4	352.176	0.072466	0.00054964	59.198	yes	1.053	1.019	0.732	0.944	1.12	1.132
1474	AHVDDINNTHLR	A0A2G2ZXC6	Glucose-6-phosphate isomerase OS=Capsicum annuum OX=4072 GN=T459_08743	4	352.176	-0.57051	4.4979e-05	86.463	yes	0.969	0.849	0.993	1.025	1.074	1.09
1475	AHVDDINNTHLR	A0A2G2ZXC6	Glucose-6-phosphate isomerase OS=Capsicum annuum OX=4072 GN=T459_08743	3	469.232	-0.8879	2.6556e-12	111.63	yes	NA	NA	NA	NA	NA	NA
1476	AHVDDINNTHLR	A0A2G2ZXC6	Glucose-6-phosphate isomerase OS=Capsicum annuum OX=4072 GN=T459_08743	4	352.176	-0.48494	0.00016545	68.536	yes	1.05	0.964	1.028	0.967	1.017	0.973
1477	AHVDDINNTHLR	A0A2G2ZXC6	Glucose-6-phosphate isomerase OS=Capsicum annuum OX=4072 GN=T459_08743	3	469.232	-0.79825	2.6556e-12	111.63	yes	1.016	0.925	0.817	1.02	1.172	1.05
1478	AHVDDINNTHLR	A0A2G2ZXC6	Glucose-6-phosphate isomerase OS=Capsicum annuum OX=4072 GN=T459_08743	4	351.93	-0.31541	0.00015251	75.416	yes	0.803	1.111	0.955	0.986	1.031	1.114
1479	AHVDDINNTHLR	A0A2G2ZXC6	Glucose-6-phosphate isomerase OS=Capsicum annuum OX=4072 GN=T459_08743	3	468.904	-1.0573	4.0511e-08	100.93	yes	1.121	0.82	0.94	1.053	1.029	1.037
1480	AHVDDINNTHLR	A0A2G2ZXC6	Glucose-6-phosphate isomerase OS=Capsicum annuum OX=4072 GN=T459_08743	4	351.93	-0.54294	0.00016309	68.536	yes	1.013	0.652	1.049	0.997	1.011	1.278
1481	AHVEGQLK	A0A1U8F6U2	Uncharacterized protein OS=Capsicum annuum OX=4072 GN=T459_31444	3	294.499	0.90725	0.028202	43.124	yes	NA	NA	NA	NA	NA	NA
1482	AHVIVMGATNRPNSIDPALR	A0A1U8H311	Cell division cycle protein 48-like protein OS=Capsicum annuum OX=4072 GN=T459_18122	4	533.79	-0.73462	0.00033014	45.237	no	0.859	0.938	0.892	1.025	1.133	1.152
1483	AHVIVMGATNRPNSIDPALR	A0A1U8H311	Cell division cycle protein 48-like protein OS=Capsicum annuum OX=4072 GN=T459_18122	3	711.385	-1.5998	0.00020597	46.838	no	NA	NA	NA	NA	NA	NA
1484	AHVIVMGATNRPNSIDPALR	A0A1U8H311	Cell division cycle protein 48-like protein OS=Capsicum annuum OX=4072 GN=T459_18122	4	534.036	-0.97173	0.0002202	48.907	no	1.017	0.945	1.042	0.944	1.165	0.888
1485	AHVIVMGATNRPNSIDPALR	A0A1U8H311	Cell division cycle protein 48-like protein OS=Capsicum annuum OX=4072 GN=T459_18122	3	711.713	-1.7927	0.00038147	46.494	no	0.739	0.784	0.841	1.038	1.257	1.341
1486	AHVLAQDSGYHQLISHWLR	F2YL87	Lipoxygenase OS=Capsicum annuum OX=4072 GN=LOX	5	447.035	0.2295	8.3423e-13	79.837	yes	0.87	1.036	0.702	1.214	0.995	1.183
1487	AHVLAQDSGYHQLISHWLR	F2YL87	Lipoxygenase OS=Capsicum annuum OX=4072 GN=LOX	3	744.387	-1.0759	2.202e-23	116.06	yes	0.995	0.855	1.01	1.042	1.032	1.066
1488	AHYDEYR	A0A2G3AJJ8	Uncharacterized protein (Fragment) OS=Capsicum annuum OX=4072 GN=T459_02262	3	318.475	-0.35454	0.020892	51.787	yes	NA	NA	NA	NA	NA	NA
1489	AHYKDEEAR	A0A2G2Z1I4	Uncharacterized protein OS=Capsicum annuum OX=4072 GN=T459_19336	4	280.386	-0.43795	0.0064411	51.276	yes	NA	NA	NA	NA	NA	NA
1490	AIAAAVEGVEK	A0A2G2XWC8	CBS domain-containing protein CBSCBSPB1 OS=Capsicum annuum OX=4072 GN=T459_34348	2	529.298	-1.236	2.6053e-05	95.477	yes	0.927	0.861	0.961	1.106	1.151	0.994
1491	AIAADSTFLK	A0A1U8H3D2	Uncharacterized protein OS=Capsicum annuum OX=4072 GN=T459_34131	2	518.787	-1.5604	0.0093294	59.067	yes	1.046	0.994	1.038	0.928	1.058	0.936
1492	AIAADSTFLK	A0A1U8H3D2	Uncharacterized protein OS=Capsicum annuum OX=4072 GN=T459_34131	3	346.194	-0.34993	0.036819	34.206	yes	1.205	0.989	1.03	0.942	0.928	0.907
1493	AIADLGDEEYK	A0A1U8FJ74	Glucose-6-phosphate 1-epimerase OS=Capsicum annuum OX=4072 GN=T459_00176	2	612.293	-3.3268	4.6635e-07	103.91	yes	1.003	0.977	0.958	1.053	1.024	0.986
1494	AIADLGDEEYK	A0A1U8FJ74	Glucose-6-phosphate 1-epimerase OS=Capsicum annuum OX=4072 GN=T459_00176	3	408.531	-1.7516	0.0020555	55.806	yes	NA	NA	NA	NA	NA	NA
1495	AIADLVK	K4FXE7	Triose phosphate isomerase cytosolic isoform-like protein OS=Capsicum annuum OX=4072 GN=TPI	2	365.229	-1.6188	0.02882	79.116	yes	NA	NA	NA	NA	NA	NA
1496	AIADLVK	K4FXE7	Triose phosphate isomerase cytosolic isoform-like protein OS=Capsicum annuum OX=4072 GN=TPI	3	243.822	0.20375	0.012564	62.715	yes	1.058	1.01	0.947	0.964	1.057	0.964
1497	AIADLVK	K4FXE7	Triose phosphate isomerase cytosolic isoform-like protein OS=Capsicum annuum OX=4072 GN=TPI	2	365.229	-1.553	0.018351	87.323	yes	1.021	0.965	1.122	0.901	1.05	0.941
1498	AIADLVK	K4FXE7	Triose phosphate isomerase cytosolic isoform-like protein OS=Capsicum annuum OX=4072 GN=TPI	3	243.822	-1.0535	0.0098127	69.432	yes	1.025	0.961	0.99	0.977	1.054	0.992
1499	AIADLVK	K4FXE7	Triose phosphate isomerase cytosolic isoform-like protein OS=Capsicum annuum OX=4072 GN=TPI	2	365.229	-0.27092	0.053976	60.799	yes	NA	NA	NA	NA	NA	NA
1500	AIADVAYK	A0A2G2YA34	Glycine cleavage system P protein OS=Capsicum annuum OX=4072 GN=T459_31028	2	425.737	-1.4079	0.0068232	89.698	no	1.029	1.022	0.987	0.921	1.061	0.979
1501	AIADVAYK	A0A2G2YA34	Glycine cleavage system P protein OS=Capsicum annuum OX=4072 GN=T459_31028	3	284.16	-0.10369	0.0065928	67.032	no	NA	NA	NA	NA	NA	NA
1502	AIADVAYK	A0A2G2YA34	Glycine cleavage system P protein OS=Capsicum annuum OX=4072 GN=T459_31028	2	425.737	-2.3583	0.0063417	124.98	no	1.078	0.945	0.945	0.953	1.102	0.978
1503	AIADVAYK	A0A2G2YA34	Glycine cleavage system P protein OS=Capsicum annuum OX=4072 GN=T459_31028	3	284.16	-1.2239	0.0065928	67.032	no	1.067	1.005	0.986	0.902	1.095	0.945
1504	AIAEALGLAAVK	A0A2G2YXI5	K(+) efflux antiporter 1, chloroplastic OS=Capsicum annuum OX=4072 GN=T459_21757	2	563.845	-2.1233	0.0010227	78.342	yes	0.972	0.965	0.955	1.014	1.037	1.058
1505	AIAEALGLAAVK	A0A2G2YXI5	K(+) efflux antiporter 1, chloroplastic OS=Capsicum annuum OX=4072 GN=T459_21757	3	376.233	-0.16746	0.0060679	44.847	yes	NA	NA	NA	NA	NA	NA
1506	AIAEGKPDPCPLHTAWLK	A0A1U8G2T2	Uncharacterized protein OS=Capsicum annuum OX=4072 GN=T459_10620	4	501.765	-2.5448	0.00043429	46.249	yes	1.11	0.937	0.976	0.93	1.067	0.98
1507	AIAEGKPDPCPLHTAWLK	A0A1U8G2T2	Uncharacterized protein OS=Capsicum annuum OX=4072 GN=T459_10620	5	401.613	-1.7871	3.4187e-12	89.484	yes	0.99	1.038	0.955	0.974	1.114	0.929
1508	AIAEGKPDPCPLHTAWLK	A0A1U8G2T2	Uncharacterized protein OS=Capsicum annuum OX=4072 GN=T459_10620	3	668.684	-2.5653	6.4132e-11	84.653	yes	0.971	0.873	0.908	1.096	1.154	0.998
1509	AIAELIPK	A0A2G3A8H5	Clathrin light chain OS=Capsicum annuum OX=4072 GN=T459_05672	2	427.771	-0.5052	0.030201	64.265	yes	NA	NA	NA	NA	NA	NA
1510	AIAELIPK	A0A2G3A8H5	Clathrin light chain OS=Capsicum annuum OX=4072 GN=T459_05672	3	285.516	0.98689	0.018607	47.849	yes	1.014	0.922	0.913	1.029	1.15	0.972
1511	AIAFDEIDKAPEEK	A0A2G2ZWE9	Elongation factor Tu OS=Capsicum annuum OX=4072 GN=T459_08405	3	525.935	-3.2639	0.00027773	66.004	no	NA	NA	NA	NA	NA	NA
1512	AIALGLNK	A0A2G3A0H5	Uncharacterized protein OS=Capsicum annuum OX=4072 GN=T459_09839	3	267.173	-0.96175	0.002583	83.614	yes	0.94	0.985	1.021	0.97	1.121	0.963
1513	AIALHSQVITEFCK	A0A2G2ZU96	Protein PROTON GRADIENT REGULATION 5, chloroplastic OS=Capsicum annuum OX=4072 GN=T459_07652	3	539.62	-1.0887	4.6739e-06	91.62	yes	0.982	0.997	0.924	0.982	1.118	0.996
1514	AIALHSQVITEFCK	A0A2G2ZU96	Protein PROTON GRADIENT REGULATION 5, chloroplastic OS=Capsicum annuum OX=4072 GN=T459_07652	4	404.967	-0.0059528	3.7199e-05	72.29	yes	1.023	0.909	0.858	1.137	1.006	1.066
1515	AIALSEDHKPNR	A0A1U8G8S5	Uncharacterized protein OS=Capsicum annuum OX=4072 GN=T459_09560	4	338.434	0.37622	0.007291	41.164	yes	NA	NA	NA	NA	NA	NA
1516	AIALTVDTPR	A0A1U8F1N7	Peroxisomal (S)-2-hydroxy-acid oxidase GLO1 OS=Capsicum annuum OX=4072 GN=T459_20462	2	528.806	0.0021892	3.3233e-05	115.78	no	0.976	0.931	0.983	1.09	1.042	0.978
1517	AIALTVDTPR	A0A1U8F1N7	Peroxisomal (S)-2-hydroxy-acid oxidase GLO1 OS=Capsicum annuum OX=4072 GN=T459_20462	3	352.873	0.79768	1.3444e-05	101.65	no	1.075	1.104	0.834	0.813	1.066	1.108
1518	AIANECQANFISIK	A0A2G2YQ21	Cell division cycle protein 48-like protein OS=Capsicum annuum OX=4072 GN=T459_22589	2	789.901	-2.4592	0.0014301	63.185	no	0.355	0.322	0.275	1.624	1.822	1.602
1519	AIANECQANFISIK	A0A2G2YQ21	Cell division cycle protein 48-like protein OS=Capsicum annuum OX=4072 GN=T459_22589	3	526.936	-2.184	0.0042141	42.317	no	NA	NA	NA	NA	NA	NA
1520	AIANECQANFISVK	A0A1U8H311	Cell division cycle protein 48-like protein OS=Capsicum annuum OX=4072 GN=T459_18122	3	522.592	-1.3599	0.00080019	59.709	no	0.985	0.934	0.948	1.072	1.049	1.012
1521	AIANECQANFISVK	A0A1U8H311	Cell division cycle protein 48-like protein OS=Capsicum annuum OX=4072 GN=T459_18122	2	782.893	-3.2229	0.00020316	76.759	no	NA	NA	NA	NA	NA	NA
1522	AIANSTFGETLR	A0A1U8GA31	Chlorophyll a-b binding protein, chloroplastic OS=Capsicum annuum OX=4072 GN=T459_13532	2	640.336	-2.2135	0.0039477	58.574	yes	NA	NA	NA	NA	NA	NA
1523	AIAPTDLK	A0A1U8DZI7	Methylcrotonoyl-CoA carboxylase beta chain, mitochondrial OS=Capsicum annuum OX=4072 GN=T459_33045	2	414.745	-2.8074	0.05187	53.968	yes	1.065	0.977	0.99	0.985	1.064	0.919
1524	AIAQYTADAR	A0A2G3AJ30	Phytochrome B OS=Capsicum annuum OX=4072 GN=T459_02127	2	540.278	-1.6045	0.02616	49.189	yes	1.168	0.999	1.062	0.992	0.987	0.792
1525	AIASISAGNDDTIGAMIADAIDK	A0A2G2YI86	RuBisCO large subunit-binding protein subunit alpha, chloroplastic OS=Capsicum annuum OX=4072 GN=T459_28933	3	750.37	-0.87511	2.3513e-32	120.23	yes	0.939	0.892	1.09	0.939	0.989	1.151
1526	AIASISAGNDDTIGAMIADAIDK	A0A2G2YI86	RuBisCO large subunit-binding protein subunit alpha, chloroplastic OS=Capsicum annuum OX=4072 GN=T459_28933	3	750.37	-1.1141	2.7871e-31	118.32	yes	0.994	1.051	0.823	1.049	1	1.083
1527	AIASNIDANFLK	A0A1U8E037	26S protease regulatory subunit 10B OS=Capsicum annuum OX=4072 GN=T459_34208	2	638.848		3.2275e-48	143.25	yes	NA	NA	NA	NA	NA	NA
1528	AIASNIDANFLK	A0A1U8E037	26S protease regulatory subunit 10B OS=Capsicum annuum OX=4072 GN=T459_34208	2	638.848	-3.0252	4.9293e-25	164.68	yes	0.946	0.986	1.002	1.064	1.044	0.958
1529	AIATAEALEGK	A0A2G2YGA3	E3 UFM1-protein ligase 1-like protein OS=Capsicum annuum OX=4072 GN=T459_28237	3	358.533	0.34698	0.037615	33.057	yes	NA	NA	NA	NA	NA	NA
1530	AIATHCFPALIR	A0A2G3A0B6	Exportin-1 OS=Capsicum annuum OX=4072 GN=T459_09764	3	457.252	0.22302	0.013572	38.1	yes	NA	NA	NA	NA	NA	NA
1531	AIATSAPQSSQDFVGADDEVAEK	A0A2G2Y058	Presequence protease 2, chloroplastic/mitochondrial OS=Capsicum annuum OX=4072 GN=T459_33014	3	779.368	-2.9836	1.532e-15	79.69	yes	1.007	1.039	1.037	1.062	0.876	0.978
1532	AIAVLSSASSVSLER	A0A2G2Y5J2	Uncharacterized protein OS=Capsicum annuum OX=4072 GN=T459_29423	3	497.279	0.18919	9.3017e-06	69.261	yes	NA	NA	NA	NA	NA	NA
1533	AIAVYATEDK	A0A2G3AEC1	Copper chaperone for superoxide dismutase, chloroplastic/cytosolic OS=Capsicum annuum OX=4072 GN=T459_00432	2	540.782	-1.3017	3.0477e-05	110.39	yes	0.855	0.881	0.866	1.075	1.214	1.109
1534	AICCLCQLR	A0A2G3A0D4	D-xylose-proton symporter-like 2 OS=Capsicum annuum OX=4072 GN=T459_09767	2	597.283	-1.5788	0.026569	54.712	yes	NA	NA	NA	NA	NA	NA
1535	AICIVHNETATGVTNNLATVR	A0A2G2YAX9	Serine--glyoxylate aminotransferase OS=Capsicum annuum OX=4072 GN=T459_31337	3	752.386	-1.5799	1.3487e-14	88.176	yes	0.95	0.941	0.951	1.045	1.16	0.953
1536	AICIVHNETATGVTNNLATVR	A0A2G2YAX9	Serine--glyoxylate aminotransferase OS=Capsicum annuum OX=4072 GN=T459_31337	4	564.542	-0.64305	2.4466e-37	133.93	yes	NA	NA	NA	NA	NA	NA
1537	AICIVHNETATGVTNNLATVR	A0A2G2YAX9	Serine--glyoxylate aminotransferase OS=Capsicum annuum OX=4072 GN=T459_31337	3	752.386	-1.4969	1.437e-09	72.568	yes	0.982	0.949	0.915	1.041	1.039	1.074
1538	AICIVHNETATGVTNNLATVR	A0A2G2YAX9	Serine--glyoxylate aminotransferase OS=Capsicum annuum OX=4072 GN=T459_31337	3	752.386	-1.7593	2.8247e-07	65.184	yes	0.966	0.946	0.946	1.01	1.12	1.012
1539	AICIVHNETATGVTNNLATVR	A0A2G2YAX9	Serine--glyoxylate aminotransferase OS=Capsicum annuum OX=4072 GN=T459_31337	3	752.058	-2.0848	1.0359e-13	81.807	yes	1.009	0.881	0.951	1.047	1.13	0.982
1540	AICIVHNETATGVTNNLATVR	A0A2G2YAX9	Serine--glyoxylate aminotransferase OS=Capsicum annuum OX=4072 GN=T459_31337	4	564.296	-1.5758	9.022e-68	175.33	yes	0.9	0.871	0.909	1.092	1.097	1.131
1541	AICSEYR	A0A2G2Y815	Developmentally-regulated GTP-binding protein 1 OS=Capsicum annuum OX=4072 GN=T459_30299	2	449.708	-2.0311	0.018401	87.284	yes	NA	NA	NA	NA	NA	NA
1542	AICTEAGLLALR	A0A2G2ZEH3	26S protease regulatory subunit 4 OS=Capsicum annuum OX=4072 GN=T459_18451	3	429.908	-0.010212	0.00027824	69.786	yes	NA	NA	NA	NA	NA	NA
1543	AIDCAYPCDR	A0A1U8DXH7	Pectin acetylesterase OS=Capsicum annuum OX=4072 GN=T459_33597	2	620.758	-1.4639	0.0092743	59.198	yes	NA	NA	NA	NA	NA	NA
1544	AIDCAYPCDR	A0A1U8DXH7	Pectin acetylesterase OS=Capsicum annuum OX=4072 GN=T459_33597	2	620.758	-1.7711	0.0053776	68.536	yes	1.107	0.944	0.928	0.938	1.008	1.074
1545	AIDDAEGIVK	A0A1U8GZI9	Dihydrolipoyl dehydrogenase OS=Capsicum annuum OX=4072 GN=T459_15259	2	515.774	-2.4048	3.4509e-05	118.28	no	1.093	0.994	0.998	0.999	1.008	0.908
1546	AIDDAEGIVK	A0A1U8GZI9	Dihydrolipoyl dehydrogenase OS=Capsicum annuum OX=4072 GN=T459_15259	3	344.185	-0.2319	0.010905	44.863	no	NA	NA	NA	NA	NA	NA
1547	AIDEFNNVLR	A0A2G3ALF2	Bifunctional 3-dehydroquinate dehydratase/shikimate dehydrogenase, chloroplastic (Fragment) OS=Capsicum annuum OX=4072 GN=T459_02922	2	595.812	-1.4988	1.7008e-05	127.92	yes	1.018	0.913	0.917	1.076	1.036	1.039
1548	AIDHHLTAK	A0A1U8EMH5	Uncharacterized protein OS=Capsicum annuum OX=4072 GN=T459_28412	4	252.142	0.024224	0.049752	26.442	yes	NA	NA	NA	NA	NA	NA
1549	AIDIYLK	A0A1U8FWX7	BTB/POZ domain-containing protein OS=Capsicum annuum OX=4072 GN=T459_06592	2	418.25	-1.9341	0.037355	71.342	no	NA	NA	NA	NA	NA	NA
1550	AIDLDDIK	A0A1U8FC27	AP-1 complex subunit mu-1 OS=Capsicum annuum OX=4072 GN=T459_27805	2	451.745	0.16049	0.0068693	93.649	yes	NA	NA	NA	NA	NA	NA
1551	AIDLIDEAGSK	A0A1U8FW02	Chaperone protein ClpD, chloroplastic OS=Capsicum annuum OX=4072 GN=T459_10643	2	566.298	-1.7043	0.0030841	65.179	yes	0.79	0.79	0.786	1.24	1.228	1.165
1552	AIDLIDEAGSR	A0A2G3A2X5	Chaperone protein ClpC1, chloroplastic OS=Capsicum annuum OX=4072 GN=T459_10684	2	580.301	-0.88134	3.1297e-08	113.61	no	0.952	0.96	0.974	1.073	1.009	1.032
1553	AIDLIDEAGSR	A0A2G3A2X5	Chaperone protein ClpC1, chloroplastic OS=Capsicum annuum OX=4072 GN=T459_10684	3	387.203	0.19966	0.0030105	53.237	no	1.042	0.877	0.965	1.108	1.096	0.912
1554	AIDLVDEAAAK	A0A2G3ACG7	Chaperone protein ClpB3, chloroplastic OS=Capsicum annuum OX=4072 GN=T459_07040	3	372.536	0.098403	0.00041891	70.942	yes	1.011	0.972	0.9	1.118	0.996	1.003
1555	AIDLVDEAAAK	A0A2G3ACG7	Chaperone protein ClpB3, chloroplastic OS=Capsicum annuum OX=4072 GN=T459_07040	2	558.301	-1.676	8.358e-05	88.596	yes	1	0.931	0.963	1.024	1.095	0.986
1556	AIDLVDEACANVR	A0A1U8G5J6	Chaperone protein ClpB1 OS=Capsicum annuum OX=4072 GN=T459_10363	2	723.356	-1.4459	4.7983e-08	106.32	yes	0.535	0.539	0.562	1.398	1.527	1.44
1557	AIDLVDEACANVR	A0A1U8G5J6	Chaperone protein ClpB1 OS=Capsicum annuum OX=4072 GN=T459_10363	3	482.573	0.029762	0.0043437	44.511	yes	NA	NA	NA	NA	NA	NA
1558	AIDNMSEVSVEDTEK	A0A2G2ZFT2	Uncharacterized protein OS=Capsicum annuum OX=4072 GN=T459_13872	3	556.254	-1.1898	0.00019047	57.288	yes	NA	NA	NA	NA	NA	NA
1559	AIDNPGLTPSSSLR	A0A1U8EI55	Uncharacterized protein OS=Capsicum annuum OX=4072 GN=T459_22417	2	714.378	-1.4848	1.4846e-05	93.243	yes	0.973	0.963	1.007	0.972	1.066	1.019
1560	AIDNPGLTPSSSLR	A0A1U8EI55	Uncharacterized protein OS=Capsicum annuum OX=4072 GN=T459_22417	2	714.378	-2.1752	0.00823	46.318	yes	1.018	0.947	0.953	1.05	1.04	0.992
1561	AIDVDSLEK	A0A2G2YL73	Signal recognition particle subunit SRP72 OS=Capsicum annuum OX=4072 GN=T459_25597	2	495.261	-3.2458	0.0011404	102.52	yes	1.039	0.995	1.001	0.951	1.048	0.966
1562	AIDVFGR	A0A2G2Z1F1	Uncharacterized protein OS=Capsicum annuum OX=4072 GN=T459_19253	2	389.216	-0.7913	0.040107	68.787	yes	NA	NA	NA	NA	NA	NA
1563	AIEAANK	A0A2G2YEZ3	Putative alanine aminotransferase, mitochondrial OS=Capsicum annuum OX=4072 GN=T459_27803	2	358.701	-1.3137	0.033187	75.213	yes	NA	NA	NA	NA	NA	NA
1564	AIEFNSIIER	A0A2G2YEH5	AP-1 complex subunit gamma OS=Capsicum annuum OX=4072 GN=T459_27586	2	596.322	-1.0021	0.00051229	88.155	no	0.995	0.958	1.058	1.02	1.007	0.962
1565	AIEGAFEK	A0A1U8EL35	Uridine 5'-monophosphate synthase OS=Capsicum annuum OX=4072 GN=T459_28572	3	288.82	1.0266	0.01146	55.531	yes	NA	NA	NA	NA	NA	NA
1566	AIEGVPELK	A0A2G2ZK37	60S ribosomal protein L6 OS=Capsicum annuum OX=4072 GN=T459_15358	2	478.277	-1.7344	0.0010853	117.7	yes	1.086	0.992	1.015	0.95	1.057	0.9
1567	AIEIFEEIAR	A0A1U8GZ48	Alpha-soluble NSF attachment protein OS=Capsicum annuum OX=4072 GN=T459_15118	3	397.552	0.61073	0.0023228	59.067	no	0.897	0.823	0.951	1.259	1.079	0.991
1568	AIELDDGDISFITNR	A0A1U8GC69	Hsp70-Hsp90 organizing protein 1 OS=Capsicum annuum OX=4072 GN=T459_00526	3	560.281	-0.84546	0.0001198	61.409	yes	0.929	0.884	0.891	0.87	1.235	1.191
1569	AIELDPYMSK	A0A2G2ZZK2	Protein SGT1-like protein A OS=Capsicum annuum OX=4072 GN=T459_09496	3	394.862	0.12869	0.0031486	52.579	yes	0.945	1.036	0.804	1.242	0.996	0.977
1570	AIELDPYMSK	A0A2G2ZZK2	Protein SGT1-like protein A OS=Capsicum annuum OX=4072 GN=T459_09496	2	591.789	-1.5622	0.0096039	51.445	yes	NA	NA	NA	NA	NA	NA
1571	AIELDPYMSK	A0A2G2ZZK2	Protein SGT1-like protein A OS=Capsicum annuum OX=4072 GN=T459_09496	3	394.862	0.66509	0.005014	46.819	yes	NA	NA	NA	NA	NA	NA
1572	AIELDPYMSK	A0A2G2ZZK2	Protein SGT1-like protein A OS=Capsicum annuum OX=4072 GN=T459_09496	2	583.792	-1.3872	0.0015589	79.659	yes	0.96	0.864	0.928	1.07	1.097	1.081
1573	AIELDPYMSK	A0A2G2ZZK2	Protein SGT1-like protein A OS=Capsicum annuum OX=4072 GN=T459_09496	3	389.53	0.30785	0.0015899	66.056	yes	0.959	0.845	0.918	1.087	1.093	1.098
1574	AIELLSLWQEK	A0A1U8G2J6	Factor of DNA methylation 1 OS=Capsicum annuum OX=4072 GN=T459_10555	3	443.919	0.41561	9.429e-05	83.862	yes	0.982	1.027	1.174	0.865	0.952	1.001
1575	AIELPDAMENAGASLIR	A0A2G2YI86	RuBisCO large subunit-binding protein subunit alpha, chloroplastic OS=Capsicum annuum OX=4072 GN=T459_28933	3	596.305	-0.88873	5.1368e-08	75.911	yes	1.046	0.891	0.991	1.006	1.135	0.931
1576	AIELPDAMENAGASLIR	A0A2G2YI86	RuBisCO large subunit-binding protein subunit alpha, chloroplastic OS=Capsicum annuum OX=4072 GN=T459_28933	2	893.954	-1.2397	9.3788e-11	86.772	yes	0.957	0.981	0.965	1.042	1.011	1.044
1577	AIELPDAMENAGASLIR	A0A2G2YI86	RuBisCO large subunit-binding protein subunit alpha, chloroplastic OS=Capsicum annuum OX=4072 GN=T459_28933	3	596.305	-0.48216	1.6953e-07	70.41	yes	0.884	0.905	0.836	1.069	1.21	1.096
1578	AIELPDAMENAGASLIR	A0A2G2YI86	RuBisCO large subunit-binding protein subunit alpha, chloroplastic OS=Capsicum annuum OX=4072 GN=T459_28933	2	893.954	-0.84559	0.00014045	58.461	yes	0.911	0.88	0.993	1.039	1.117	1.061
1579	AIELPDAMENAGASLIR	A0A2G2YI86	RuBisCO large subunit-binding protein subunit alpha, chloroplastic OS=Capsicum annuum OX=4072 GN=T459_28933	3	590.973	-0.28962	3.4822e-05	63.681	yes	0.9	1.471	0.553	0.771	1.209	1.095
1580	AIELPDAMENAGASLIR	A0A2G2YI86	RuBisCO large subunit-binding protein subunit alpha, chloroplastic OS=Capsicum annuum OX=4072 GN=T459_28933	2	885.956	-0.81884	1.5008e-39	147.09	yes	1.019	0.974	0.953	0.999	1.029	1.026
1581	AIELPDAMENAGASLIR	A0A2G2YI86	RuBisCO large subunit-binding protein subunit alpha, chloroplastic OS=Capsicum annuum OX=4072 GN=T459_28933	3	596.633	-0.82745	0.0016498	46.249	yes	0.982	0.828	0.919	1.164	1.053	1.053
1582	AIELPDAMENAGASLIR	A0A2G2YI86	RuBisCO large subunit-binding protein subunit alpha, chloroplastic OS=Capsicum annuum OX=4072 GN=T459_28933	2	894.446	-1.3808	7.3535e-10	85.28	yes	0.994	0.877	0.956	1.063	1.056	1.054
1583	AIELPDAMENAGASLIR	A0A2G2YI86	RuBisCO large subunit-binding protein subunit alpha, chloroplastic OS=Capsicum annuum OX=4072 GN=T459_28933	3	596.633	-1.4258	0.0020218	45.618	yes	0.954	1.006	0.94	1.073	1.064	0.964
1584	AIELPDAMENAGASLIR	A0A2G2YI86	RuBisCO large subunit-binding protein subunit alpha, chloroplastic OS=Capsicum annuum OX=4072 GN=T459_28933	2	894.446	-1.7953	0.024587	41.088	yes	0.886	0.941	0.936	0.954	1.12	1.163
1585	AIELPDAMENAGASLIR	A0A2G2YI86	RuBisCO large subunit-binding protein subunit alpha, chloroplastic OS=Capsicum annuum OX=4072 GN=T459_28933	3	591.301	-0.55766	4.5221e-07	68.576	yes	0.897	1.014	0.911	1.077	1	1.1
1586	AIELPDAMENAGASLIR	A0A2G2YI86	RuBisCO large subunit-binding protein subunit alpha, chloroplastic OS=Capsicum annuum OX=4072 GN=T459_28933	2	886.448	-1.0852	0.00045703	59.502	yes	0.929	0.929	0.948	1.077	1.057	1.061
1587	AIELTEQADTK	J7H3V0	30S ribosomal protein S3, chloroplastic OS=Capsicum annuum OX=4072 GN=rps3	3	406.879	-0.37349	3.4383e-08	108.43	yes	1.058	0.908	0.957	0.948	1.124	1.004
1588	AIELTEQADTK	J7H3V0	30S ribosomal protein S3, chloroplastic OS=Capsicum annuum OX=4072 GN=rps3	2	609.814	-1.3534	3.8221e-28	178.1	yes	1.077	1.009	1.056	0.937	0.99	0.93
1589	AIELTEQADTK	J7H3V0	30S ribosomal protein S3, chloroplastic OS=Capsicum annuum OX=4072 GN=rps3	3	406.879	-1.4936	0.033839	33.761	yes	NA	NA	NA	NA	NA	NA
1590	AIELTEQADTK	J7H3V0	30S ribosomal protein S3, chloroplastic OS=Capsicum annuum OX=4072 GN=rps3	2	609.814	-2.7761	8.1084e-09	131.69	yes	1.095	0.934	1.103	0.912	1.102	0.854
1591	AIELVAGK	A0A1U8DSA1	Uncharacterized protein OS=Capsicum annuum OX=4072 GN=T459_21618	3	267.501	0.2036	0.0087187	60.682	yes	1.063	1.014	1.001	0.952	1.019	0.951
1592	AIELVAGK	A0A1U8DSA1	Uncharacterized protein OS=Capsicum annuum OX=4072 GN=T459_21618	2	400.747	-1.1585	0.019515	73.248	yes	1.046	1.033	0.998	0.885	1.114	0.925
1593	AIESVPELK	A0A2G2Y4M8	60S ribosomal protein L6 OS=Capsicum annuum OX=4072 GN=T459_29084	2	493.282	-1.8841	0.0023031	87.258	yes	1.1	0.925	0.966	0.922	1.074	1.013
1594	AIESVPELK	A0A2G2Y4M8	60S ribosomal protein L6 OS=Capsicum annuum OX=4072 GN=T459_29084	3	329.19	-0.23076	0.0034089	66.692	yes	0.971	0.973	1.011	0.996	1.184	0.865
1595	AIEVVDVDQK	A0A2G2Z7W6	Pumilio-like protein 1 OS=Capsicum annuum OX=4072 GN=T459_16155	3	372.536	-0.96994	0.0022347	59.908	yes	NA	NA	NA	NA	NA	NA
1596	AIEWFEK	A0A2G2Y4A4	Pentatricopeptide repeat-containing protein, chloroplastic OS=Capsicum annuum OX=4072 GN=T459_29028	2	461.737	-1.0528	0.016873	93.374	yes	NA	NA	NA	NA	NA	NA
1597	AIEYDNFIECCLTVK	A0A2G2YNT2	Putative calcium-binding protein CML50 OS=Capsicum annuum OX=4072 GN=T459_26517	3	625.627	-0.89873	4.0334e-07	79.804	yes	0.901	0.869	0.808	1.166	1.156	1.099
1598	AIFEAQNDIR	A0A1U8FE20	Uncharacterized protein OS=Capsicum annuum OX=4072 GN=T459_23306	2	588.804	-0.58885	0.00010255	98.156	yes	0.987	0.981	0.893	1.046	1.004	1.09
1599	AIFEAQNDIR	A0A1U8FE20	Uncharacterized protein OS=Capsicum annuum OX=4072 GN=T459_23306	2	588.804	-1.0418	8.2845e-06	132.32	yes	1.055	0.984	1.022	0.896	1.026	1.017
1600	AIFEAQNDIR	A0A1U8FE20	Uncharacterized protein OS=Capsicum annuum OX=4072 GN=T459_23306	3	392.872	0.50861	0.0053925	51.445	yes	NA	NA	NA	NA	NA	NA
1601	AIFPDSNILITR	A0A2G2Y8H9	Uncharacterized protein OS=Capsicum annuum OX=4072 GN=T459_30500	2	680.385	-1.7158	0.003782	59.116	yes	0.989	0.964	0.97	0.964	1.083	1.03
1602	AIFPDSNILITR	A0A2G2Y8H9	Uncharacterized protein OS=Capsicum annuum OX=4072 GN=T459_30500	3	453.926	-0.4448	0.00025751	77.597	yes	NA	NA	NA	NA	NA	NA
1603	AIFPDSNILITR	A0A2G2Y8H9	Uncharacterized protein OS=Capsicum annuum OX=4072 GN=T459_30500	2	680.385	-0.7165	0.0011256	69.03	yes	1.041	0.986	1.016	0.876	1.005	1.076
1604	AIFTEGCK	A0A1U8GR36	Chaperonin CPN60-2, mitochondrial OS=Capsicum annuum OX=4072 GN=T459_15223	2	463.226	-1.9109	0.0068192	89.355	yes	1.05	1.012	1.079	0.915	1.063	0.882
1605	AIGAAGLGNDIK	A0A1U8HEC1	Glucan endo-1,3-beta-glucosidase, basic isoform 2 OS=Capsicum annuum OX=4072 GN=T459_02123	3	367.208	-0.25911	0.00022574	79.659	yes	0.988	0.847	0.893	1.102	1.125	1.045
1606	AIGAAGLGNDIK	A0A1U8HEC1	Glucan endo-1,3-beta-glucosidase, basic isoform 2 OS=Capsicum annuum OX=4072 GN=T459_02123	3	367.536	0.23001	0.00038358	72.2	yes	0.895	0.897	1.009	1.108	1.043	1.048
1607	AIGAAGLGNDIK	A0A1U8HEC1	Glucan endo-1,3-beta-glucosidase, basic isoform 2 OS=Capsicum annuum OX=4072 GN=T459_02123	2	550.801	-2.3417	0.016075	52.247	yes	0.852	0.861	0.908	1.154	1.148	1.077
1608	AIGANVPR	A0A2G2Y4H0	UTP--glucose-1-phosphate uridylyltransferase OS=Capsicum annuum OX=4072 GN=T459_29070	2	399.235	-0.66503	0.042233	56.547	no	0.803	0.909	0.931	1.108	1.24	1.009
1609	AIGCELDLSDKPVGLGVR	A0A2G2YMS7	Peroxiredoxin-2E, chloroplastic OS=Capsicum annuum OX=4072 GN=T459_26152	3	633.672	-1.1488	1.4328e-64	188.71	yes	1.136	0.926	1.01	0.904	1.035	0.988
1610	AIGCELDLSDKPVGLGVR	A0A2G2YMS7	Peroxiredoxin-2E, chloroplastic OS=Capsicum annuum OX=4072 GN=T459_26152	4	475.506	-0.20696	1.2591e-11	87.429	yes	1.062	0.906	0.998	1.01	1.079	0.945
1611	AIGDPIFFR	A0A1U8HIT8	Heat shock 70 kDa protein 17 OS=Capsicum annuum OX=4072 GN=T459_19283	2	518.285	-0.13121	0.016551	62.107	yes	NA	NA	NA	NA	NA	NA
1612	AIGEGSVR	A0A2G3A7N8	Nuclear pore complex protein OS=Capsicum annuum OX=4072 GN=T459_05331	2	394.717	-1.1112	0.024821	68.383	yes	NA	NA	NA	NA	NA	NA
1613	AIGELIPK	A0A1U8E4P5	Clathrin light chain OS=Capsicum annuum OX=4072 GN=T459_23196	3	280.844	-0.020111	0.031703	41.652	yes	NA	NA	NA	NA	NA	NA
1614	AIGESGEWHVIMACR	A0A1U8F9Y7	NADPH-protochlorophyllide oxidoreductase OS=Capsicum annuum OX=4072 GN=T459_20142	3	577.936	-0.79677	0.0020048	42.317	yes	0.989	0.959	0.921	1.062	1.091	0.978
1615	AIGESGEWHVIMACR	A0A1U8F9Y7	NADPH-protochlorophyllide oxidoreductase OS=Capsicum annuum OX=4072 GN=T459_20142	3	572.605	-0.77398	0.001417	45.992	yes	1.049	1.005	0.98	1.037	0.997	0.933
1616	AIGHPLAK	A0A2G2ZDN6	Carbamoyl-phosphate synthase large chain OS=Capsicum annuum OX=4072 GN=T459_18150	3	269.501	-0.035101	0.009288	58.981	yes	NA	NA	NA	NA	NA	NA
1617	AIGLMPMIDQGEKDDK	A0A1U8E5B7	Soluble inorganic pyrophosphatase 4 OS=Capsicum annuum OX=4072 GN=T459_22857	4	444.968	-1.0114	0.0017258	42.947	no	NA	NA	NA	NA	NA	NA
1618	AIGLMPMIDQGEKDDK	A0A1U8E5B7	Soluble inorganic pyrophosphatase 4 OS=Capsicum annuum OX=4072 GN=T459_22857	4	444.968	-0.5247	0.00098677	45.614	no	NA	NA	NA	NA	NA	NA
1619	AIGLMPMIDQGEKDDK	A0A1U8E5B7	Soluble inorganic pyrophosphatase 4 OS=Capsicum annuum OX=4072 GN=T459_22857	4	444.968	-0.97106	0.00031576	53.3	no	NA	NA	NA	NA	NA	NA
1620	AIGLMPMIDQGEKDDK	A0A1U8E5B7	Soluble inorganic pyrophosphatase 4 OS=Capsicum annuum OX=4072 GN=T459_22857	3	587.623	-1.9617	4.158e-22	130.72	no	NA	NA	NA	NA	NA	NA
1621	AIGLMPMIDQGEKDDK	A0A1U8E5B7	Soluble inorganic pyrophosphatase 4 OS=Capsicum annuum OX=4072 GN=T459_22857	3	587.623	-1.1683	1.4924e-09	99.069	no	NA	NA	NA	NA	NA	NA
1622	AIGSGSEGADSSLQEQYNK	A0A2G3ANC7	Proteasome endopeptidase complex OS=Capsicum annuum OX=4072 GN=T459_03611	3	647.633	-1.7022	1.3118e-96	206.43	yes	0.918	0.961	0.976	0.921	1.11	1.114
1623	AIGSGSEGADSSLQEQYNK	A0A2G3ANC7	Proteasome endopeptidase complex OS=Capsicum annuum OX=4072 GN=T459_03611	2	970.945	-1.4652	3.8556e-28	124.29	yes	0.989	1.007	0.954	0.995	1.086	0.97
1624	AIGSGSEGADSSLQEQYNK	A0A2G3ANC7	Proteasome endopeptidase complex OS=Capsicum annuum OX=4072 GN=T459_03611	4	485.976	-0.61491	0.031466	23.046	yes	NA	NA	NA	NA	NA	NA
1625	AIGTEIDWHQGK	A0A2G2YV08	Uncharacterized protein OS=Capsicum annuum OX=4072 GN=T459_24348	3	452.23	-1.1889	0.00026732	73.9	yes	0.957	0.991	0.898	0.996	1.085	1.073
1626	AIGVDGFGASAPADR	A0A2G2YKL2	Transketolase, chloroplastic OS=Capsicum annuum OX=4072 GN=T459_25378	2	702.349	-1.7756	3.8496e-05	68.972	yes	1.073	1.076	0.968	0.968	0.967	0.948
1627	AIGVDGFGASAPADR	A0A2G2YKL2	Transketolase, chloroplastic OS=Capsicum annuum OX=4072 GN=T459_25378	2	702.349	-1.8373	0.0029504	50.897	yes	1.016	0.911	1.029	1.093	0.995	0.956
1628	AIGVDGFGASAPADR	A0A2G2YKL2	Transketolase, chloroplastic OS=Capsicum annuum OX=4072 GN=T459_25378	3	468.569	-0.35472	9.6616e-07	77.776	yes	1.078	1.043	0.745	0.878	1.308	0.948
1629	AIGVDGFGASAPADR	A0A2G2YKL2	Transketolase, chloroplastic OS=Capsicum annuum OX=4072 GN=T459_25378	2	702.349	-1.9487	0.016045	40.278	yes	0.935	0.966	0.967	1.099	1.073	0.959
1630	AIGVSDPVR	A0A1U8E953	Arginine decarboxylase OS=Capsicum annuum OX=4072 GN=T459_01418	2	457.259	-0.35372	0.040875	49.536	yes	NA	NA	NA	NA	NA	NA
1631	AIGVSNFSTK	A0A1U8EGA1	Aldo-keto reductase family 4 member C11 OS=Capsicum annuum OX=4072 GN=T459_22967	2	512.277	-1.5061	5.1821e-05	102.4	no	1.043	0.917	0.928	0.989	1.077	1.045
1632	AIGVSNFSTK	A0A1U8EGA1	Aldo-keto reductase family 4 member C11 OS=Capsicum annuum OX=4072 GN=T459_22967	3	341.854	0.59011	0.0011999	70.028	no	1.001	0.91	0.945	1.053	1.042	1.049
1633	AIHAEQTTATGPWELCTGK	A0A2G2ZEB3	Carboxypeptidase OS=Capsicum annuum OX=4072 GN=T459_18370	3	691.002	-2.1232	1.3251e-19	105.9	yes	1.073	0.956	0.998	1.014	0.994	0.966
1634	AIHAEQTTATGPWELCTGK	A0A2G2ZEB3	Carboxypeptidase OS=Capsicum annuum OX=4072 GN=T459_18370	4	518.503	-1.8885	1.2153e-08	69.081	yes	NA	NA	NA	NA	NA	NA
1635	AIHDFDLLK	A0A1U8GUT5	Uncharacterized protein OS=Capsicum annuum OX=4072 GN=T459_13690	3	357.866	0.22076	0.0016894	76.064	yes	1.048	0.938	1.007	0.978	1.087	0.943
1636	AIHDIGPR	A0A2G2Y1U3	Thiamine biosynthetic bifunctional enzyme TH1, chloroplastic OS=Capsicum annuum OX=4072 GN=T459_32409	3	293.5	-0.60151	0.0071887	65.252	yes	NA	NA	NA	NA	NA	NA
1637	AIHDQNFTGK	A0A2G3A2U9	Uncharacterized protein OS=Capsicum annuum OX=4072 GN=T459_10648	3	377.524	0.23227	0.0001661	86.898	yes	0.912	0.944	0.964	0.973	1.131	1.076
1638	AIHDQNFTGK	A0A2G3A2U9	Uncharacterized protein OS=Capsicum annuum OX=4072 GN=T459_10648	3	377.524	-1.0256	0.0028578	56.548	yes	1.009	0.857	1.245	0.868	1.075	0.945
1639	AIHDQNFTGK	A0A2G3A2U9	Uncharacterized protein OS=Capsicum annuum OX=4072 GN=T459_10648	3	377.852	-0.76201	0.023016	41.704	yes	NA	NA	NA	NA	NA	NA
1640	AIHNVPIPSR	A0A1U8HB03	Betaine aldehyde dehydrogenase, chloroplastic OS=Capsicum annuum OX=4072 GN=T459_17755	3	368.549	-0.50105	0.051998	31.494	yes	1.239	0.785	1.109	1.085	1.023	0.759
1641	AIHNVPIPSR	A0A1U8HB03	Betaine aldehyde dehydrogenase, chloroplastic OS=Capsicum annuum OX=4072 GN=T459_17755	3	368.549	-0.59476	0.051998	31.494	yes	NA	0.749	NA	1.381	0.856	1.014
1642	AIHSEPNFR	A0A2G2YEX8	Alpha-glucan water dikinase, chloroplastic OS=Capsicum annuum OX=4072 GN=T459_27784	2	535.773	-0.34914	0.021819	56.432	yes	1.074	0.933	1.074	0.9	1.01	1.011
1643	AIHVEAPENIYPITIAK	A0A1U8G568	Electron transfer flavoprotein subunit beta, mitochondrial OS=Capsicum annuum OX=4072 GN=T459_07825	3	627.016	-0.89225	8.4545e-12	91.355	yes	NA	NA	NA	NA	NA	NA
1644	AIIGTIGDVDSYQLPDAK	A0A2G2Y051	Presequence protease 1, chloroplastic/mitochondrial OS=Capsicum annuum OX=4072 GN=T459_33015	3	625.995	-1.0065	2.5948e-40	144.29	yes	1.058	1.052	1.018	0.98	0.988	0.903
1645	AIIGTIGDVDSYQLPDAK	A0A2G2Y051	Presequence protease 1, chloroplastic/mitochondrial OS=Capsicum annuum OX=4072 GN=T459_33015	4	469.748	0.76571	7.4813e-08	70.197	yes	1.104	1.046	1.061	0.914	1.014	0.861
1646	AIIGTIGDVDSYQLPDAK	A0A2G2Y051	Presequence protease 1, chloroplastic/mitochondrial OS=Capsicum annuum OX=4072 GN=T459_33015	2	938.489	-1.2821	6.2862e-07	68.481	yes	1.017	1.087	1.035	0.939	0.998	0.925
1647	AIIGTIGDVDSYQLPDAK	A0A2G2Y051	Presequence protease 1, chloroplastic/mitochondrial OS=Capsicum annuum OX=4072 GN=T459_33015	3	625.995	-1.4119	2.7765e-12	93.424	yes	NA	NA	NA	NA	NA	NA
1648	AIIHEPITTLGLPN	A0A2G2Z6M1	Ent-kaur-16-ene synthase, chloroplastic OS=Capsicum annuum OX=4072 GN=T459_21037	2	744.925	-1.3568	2.4385e-05	89.301	yes	0.986	0.892	1.016	1.084	1.057	0.964
1649	AIIHEPITTLGLPN	A0A2G2Z6M1	Ent-kaur-16-ene synthase, chloroplastic OS=Capsicum annuum OX=4072 GN=T459_21037	3	496.952	0.25706	0.00092726	55.261	yes	NA	NA	NA	NA	NA	NA
1650	AIISDYEEQDTKPPSSSASSSK	A0A1U8FZY1	Nuclear migration protein nudC OS=Capsicum annuum OX=4072 GN=T459_09591	4	582.528	-1.975	5.6011e-29	109.85	yes	0.825	0.806	0.938	1.085	1.215	1.131
1651	AIISDYEEQDTKPPSSSASSSK	A0A1U8FZY1	Nuclear migration protein nudC OS=Capsicum annuum OX=4072 GN=T459_09591	3	776.368	-2.0493	3.5607e-30	115.39	yes	0.797	0.865	0.846	1.145	1.282	1.066
1652	AIIVNGQR	A0A2G2XXC6	Beta-galactosidase OS=Capsicum annuum OX=4072 GN=T459_33981	2	436.253	-1.3204	0.011067	89.046	no	NA	NA	NA	NA	NA	NA
1653	AILDGGK	A0A1U8GAH7	L-ascorbate oxidase-like protein OS=Capsicum annuum OX=4072 GN=T459_13458	2	337.198	-0.75981	0.046721	64.757	yes	NA	NA	NA	NA	NA	NA
1654	AILDGGNDLPFPDGILFNGR	A0A1U8HHI6	L-ascorbate oxidase-like protein OS=Capsicum annuum OX=4072 GN=T459_19929	3	701.357	-0.97053	5.5486e-06	58.693	yes	0.816	1.151	0.777	1.166	1.142	0.947
1655	AILENPNDATK	A0A1U8F6Y1	NADH-cytochrome b5 reductase OS=Capsicum annuum OX=4072 GN=T459_26361	2	593.309	-1.117	0.00049978	81.92	yes	NA	NA	NA	NA	NA	NA
1656	AILENPNDATK	A0A1U8F6Y1	NADH-cytochrome b5 reductase OS=Capsicum annuum OX=4072 GN=T459_26361	3	395.875	0.6211	0.0069833	45.653	yes	NA	NA	NA	NA	NA	NA
1657	AILENPNDATK	A0A1U8F6Y1	NADH-cytochrome b5 reductase OS=Capsicum annuum OX=4072 GN=T459_26361	2	593.309	-2.3481	2.7078e-08	121.02	yes	1.022	0.972	0.997	0.983	1.061	0.965
1658	AILETTLR	A0A2G3AH19	Ubiquitin fusion degradation protein 1-like protein (Fragment) OS=Capsicum annuum OX=4072 GN=T459_01414	2	458.777	-0.90221	0.0053475	106.04	yes	NA	NA	NA	NA	NA	NA
1659	AILFVPK	A0A2G2ZZH4	Heat shock protein 82 OS=Capsicum annuum OX=4072 GN=T459_09482	2	394.257	-0.38155	0.027211	80.377	no	NA	NA	NA	NA	NA	NA
1660	AILFVPK	A0A2G2ZZH4	Heat shock protein 82 OS=Capsicum annuum OX=4072 GN=T459_09482	3	263.174	-0.034863	0.027379	46.351	no	0.34	0.27	0.351	1.389	2.067	1.583
1661	AILFVPK	A0A2G2ZZH4	Heat shock protein 82 OS=Capsicum annuum OX=4072 GN=T459_09482	2	394.257	-1.3403	0.016701	91.584	no	0.339	0.429	0.277	1.621	1.715	1.619
1662	AILFVPK	A0A2G2ZZH4	Heat shock protein 82 OS=Capsicum annuum OX=4072 GN=T459_09482	3	263.174	0.09224	0.031436	44.973	no	0.312	0.292	0.272	1.641	1.831	1.653
1663	AILGIAITDIDHYGR	A0A1U8H7V8	NAD(P)H-quinone oxidoreductase subunit U, chloroplastic OS=Capsicum annuum OX=4072 GN=T459_16400	3	543.298	-0.44167	6.9794e-31	148.62	yes	0.983	0.994	1.295	0.945	0.923	0.86
1664	AILGNQALR	A0A2G2YNQ0	Protein QUIRKY OS=Capsicum annuum OX=4072 GN=T459_26470	2	478.288	0.36649	0.0016155	93.143	yes	NA	NA	NA	NA	NA	NA
1665	AILGSETVQAR	A0A2G2ZU42	Uncharacterized protein OS=Capsicum annuum OX=4072 GN=T459_07604	2	572.82	-0.83113	3.1644e-08	112.85	yes	NA	NA	NA	NA	NA	NA
1666	AILINGAVR	A0A1U8GWH4	Uncharacterized protein OS=Capsicum annuum OX=4072 GN=T459_29119	2	464.285	-0.99315	0.0026231	93.143	yes	1.05	1.036	0.928	0.996	0.966	1.024
1667	AILISDAMETGTVQINSAPAR	A0A2G2Z009	NADP-dependent glyceraldehyde-3-phosphate dehydrogenase (Fragment) OS=Capsicum annuum OX=4072 GN=T459_18879	3	720.044	-1.2627	8.6264e-38	139.9	yes	1.079	0.921	0.919	1.124	0.914	1.043
1668	AILLATSK	A0A1U8G3P9	60S ribosomal protein L28-1 OS=Capsicum annuum OX=4072 GN=T459_34484	2	408.763	-1.9044	0.013861	78.516	yes	NA	NA	NA	NA	NA	NA
1669	AILLATSK	A0A1U8G3P9	60S ribosomal protein L28-1 OS=Capsicum annuum OX=4072 GN=T459_34484	3	272.844	-0.22402	0.0016984	89.55	yes	1.112	1.107	1.024	0.788	0.988	0.981
1670	AILLNTK	A0A2G3AEG8	FAM10 family protein OS=Capsicum annuum OX=4072 GN=T459_00513	2	386.75	-2.8387	0.053996	60.788	yes	NA	NA	NA	NA	NA	NA
1671	AILLNTPHNPTGK	A0A2G2ZNQ4	Uncharacterized protein OS=Capsicum annuum OX=4072 GN=T459_12062	3	459.261	0.36135	0.00016205	68.463	yes	NA	NA	NA	NA	NA	NA
1672	AILNLSLR	B5LAU9	Glutamine synthetase OS=Capsicum annuum OX=4072 GN=T459_02814	2	450.779	-0.29726	0.011147	93.267	yes	0.94	1.062	1.008	0.827	1.09	1.074
1673	AILNLSLR	B5LAU9	Glutamine synthetase OS=Capsicum annuum OX=4072 GN=T459_02814	2	450.779	-0.95061	0.012598	119.21	yes	NA	NA	NA	NA	NA	NA
1674	AILPMLQAEEDER	A0A2G2ZU33	NADH dehydrogenase [ubiquinone] 1 alpha subcomplex subunit 13 (Fragment) OS=Capsicum annuum OX=4072 GN=T459_07592	3	505.589	-0.056385	0.0019463	52.071	yes	0.951	1.092	0.961	1.069	0.951	0.976
1675	AILPMLQAEEDER	A0A2G2ZU33	NADH dehydrogenase [ubiquinone] 1 alpha subcomplex subunit 13 (Fragment) OS=Capsicum annuum OX=4072 GN=T459_07592	2	757.88	-0.88437	0.00010152	87.727	yes	1.061	0.967	0.993	0.984	1.095	0.9
1676	AILPYSQALEK	A0A2G2ZXC6	Glucose-6-phosphate isomerase OS=Capsicum annuum OX=4072 GN=T459_08743	2	616.848	-1.0088	0.01357	52.247	yes	NA	NA	NA	NA	NA	NA
1677	AILPYSQALEK	A0A2G2ZXC6	Glucose-6-phosphate isomerase OS=Capsicum annuum OX=4072 GN=T459_08743	3	411.568	0.48982	0.00091575	63.624	yes	NA	NA	NA	NA	NA	NA
1678	AILSEFVEIPAENR	A0A2G2Z460	ATP-dependent zinc metalloprotease FTSH 8, chloroplastic OS=Capsicum annuum OX=4072 GN=T459_20256	3	530.279	-0.46742	5.24e-09	107.65	yes	1.008	1.014	0.718	1.071	1.011	1.179
1679	AILSEFVEIPAENR	A0A2G2Z460	ATP-dependent zinc metalloprotease FTSH 8, chloroplastic OS=Capsicum annuum OX=4072 GN=T459_20256	2	794.914	-1.6623	5.1932e-12	111.12	yes	1.028	0.97	0.848	0.975	1.09	1.09
1680	AILSEFVEIPAENR	A0A2G2Z460	ATP-dependent zinc metalloprotease FTSH 8, chloroplastic OS=Capsicum annuum OX=4072 GN=T459_20256	3	529.951	-0.38832	2.794e-19	127.71	yes	0.999	0.988	0.905	1.109	1.034	0.965
1681	AILSEFVEIPAENR	A0A2G2Z460	ATP-dependent zinc metalloprotease FTSH 8, chloroplastic OS=Capsicum annuum OX=4072 GN=T459_20256	2	794.422	-0.88017	7.0796e-58	196.42	yes	1.052	0.978	0.955	0.947	1.024	1.044
1682	AILSEFVEIPAENRVPAAVPTPAAV	A0A2G2Z460	ATP-dependent zinc metalloprotease FTSH 8, chloroplastic OS=Capsicum annuum OX=4072 GN=T459_20256	3	854.471	-1.1189	2.574e-09	65.833	yes	0.901	1.011	0.937	1.007	1.1	1.044
1683	AILSPEQFR	B7S5L0	Methionine-R-sulfoxide reductase B1 protein OS=Capsicum annuum OX=4072 GN=MsrB1	3	354.198	-0.78532	0.00029595	101.72	yes	NA	NA	NA	NA	NA	NA
1684	AILVEEWNVQPVK	A0A1U8GDF9	Serine/threonine-protein phosphatase OS=Capsicum annuum OX=4072 GN=T459_02209	3	508.952	-1.3229	0.00086721	60.255	yes	0.915	1.047	1.058	0.95	1.009	1.021
1685	AILVEGLK	A0A2G2ZNQ4	Uncharacterized protein OS=Capsicum annuum OX=4072 GN=T459_12062	2	421.771	0.29272	0.0051726	111.95	yes	NA	NA	NA	NA	NA	NA
1686	AILWITDYELPK	A0A2G2ZQ36	Uncharacterized protein OS=Capsicum annuum OX=4072 GN=T459_12553	3	487.938	-0.59826	0.037603	31.597	yes	0.995	1.068	0.952	1.01	0.935	1.04
1687	AILWITDYELPK	A0A2G2ZQ36	Uncharacterized protein OS=Capsicum annuum OX=4072 GN=T459_12553	2	731.403	-1.6411	0.0011182	69.721	yes	0.928	0.927	0.912	1.028	1.153	1.052
1688	AIMDGFGGADLTISR	A0A1U8FSC8	Uncharacterized protein OS=Capsicum annuum OX=4072 GN=T459_32280	2	770.377	-1.5056	0.0016905	48.391	yes	NA	NA	NA	NA	NA	NA
1689	AIMDGFGGADLTISR	A0A1U8FSC8	Uncharacterized protein OS=Capsicum annuum OX=4072 GN=T459_32280	2	762.38	-1.2631	9.831e-07	84.195	yes	1.003	1.021	0.996	0.979	1.031	0.97
1690	AIMDGFGGADLTISR	A0A1U8FSC8	Uncharacterized protein OS=Capsicum annuum OX=4072 GN=T459_32280	3	508.589	-0.23593	3.084e-08	95.195	yes	0.928	0.977	0.991	0.979	0.975	1.15
1691	AIMDSFR	A0A1U8DWE0	PsbP domain-containing protein 1, chloroplastic OS=Capsicum annuum OX=4072 GN=T459_31940	2	420.208	0.45587	0.017042	101.69	yes	1.098	0.912	0.904	0.978	1.037	1.071
1692	AIMEEHTLAR	A0A2G2YZ00	Cytochrome 98A1 OS=Capsicum annuum OX=4072 GN=T459_22112	3	396.201	-0.71653	0.0027689	53.751	yes	1.118	1.092	1.039	0.985	0.875	0.89
1693	AIMEEHTLAR	A0A2G2YZ00	Cytochrome 98A1 OS=Capsicum annuum OX=4072 GN=T459_22112	3	390.869	0.24429	0.02507	36.585	yes	1.129	0.998	1.223	0.7	1.07	0.879
1694	AIMGSVSNYVVNNATCPVTVVK	A0A1U8HKJ5	Uncharacterized protein OS=Capsicum annuum OX=4072 GN=T459_02121	3	775.064	-0.46057	6.6745e-22	98.543	yes	0.969	0.963	1.089	0.971	1.029	0.979
1695	AIMNAGR	A0A1U8GUH0	Alpha-galactosidase OS=Capsicum annuum OX=4072 GN=T459_14190	2	374.692	-0.50676	0.041243	49.669	yes	NA	NA	NA	NA	NA	NA
1696	AIMNAGR	A0A1U8GUH0	Alpha-galactosidase OS=Capsicum annuum OX=4072 GN=T459_14190	2	366.695	0.0027757	0.010435	136.89	yes	NA	NA	NA	NA	NA	NA
1697	AINAAHVEAESAENGIGVVK	A0A1U8F3J4	ATP-dependent 6-phosphofructokinase OS=Capsicum annuum OX=4072 GN=PFK	3	660.673	-1.328	4.855e-29	126.4	yes	0.958	0.904	0.882	1.069	1.146	1.041
1698	AINECPHGR	A0A1U8HB20	Short-chain type dehydrogenase/reductase OS=Capsicum annuum OX=4072 GN=T459_17733	3	351.835	-0.49683	0.00054369	87.639	yes	0.802	0.762	0.912	1.187	1.045	1.292
1699	AINFYENAYGMK	A0A2G2YUJ2	Lactoylglutathione lyase OS=Capsicum annuum OX=4072 GN=T459_24194	2	719.321	-1.9975	0.00978	57.175	yes	0.905	0.987	0.93	0.979	1.18	1.019
1700	AINFYENAYGMK	A0A2G2YUJ2	Lactoylglutathione lyase OS=Capsicum annuum OX=4072 GN=T459_24194	3	479.883	-0.82491	0.0062979	47.712	yes	NA	NA	NA	NA	NA	NA
1701	AINFYENAYGMK	A0A2G2YUJ2	Lactoylglutathione lyase OS=Capsicum annuum OX=4072 GN=T459_24194	2	711.324	-1.0272	5.5483e-13	125.53	yes	0.978	0.976	0.934	1.003	1.127	0.982
1702	AINFYENAYGMK	A0A2G2YUJ2	Lactoylglutathione lyase OS=Capsicum annuum OX=4072 GN=T459_24194	2	718.829	-3.3717	0.0066232	47.712	yes	1	0.916	0.911	1.11	1.015	1.048
1703	AINFYENAYGMK	A0A2G2YUJ2	Lactoylglutathione lyase OS=Capsicum annuum OX=4072 GN=T459_24194	3	479.555	-1.5882	0.00060983	59.198	yes	NA	NA	NA	NA	NA	NA
1704	AINFYENAYGMK	A0A2G2YUJ2	Lactoylglutathione lyase OS=Capsicum annuum OX=4072 GN=T459_24194	2	718.829	-2.8026	0.00045721	77.894	yes	0.98	0.933	1.011	0.942	1.168	0.967
1705	AINFYENAYGMK	A0A2G2YUJ2	Lactoylglutathione lyase OS=Capsicum annuum OX=4072 GN=T459_24194	3	474.224	-0.80845	6.5029e-06	96.604	yes	1.034	0.935	0.936	0.948	1.152	0.996
1706	AINVIPMLTPAVMEK	A0A1U8F694	Putative voltage-gated potassium channel subunit beta OS=Capsicum annuum OX=4072 GN=T459_31261	3	548.302	-0.89147	2.4951e-06	74.853	yes	0.992	0.943	0.979	1.002	1.071	1.013
1707	AINVIPMLTPAVMEK	A0A1U8F694	Putative voltage-gated potassium channel subunit beta OS=Capsicum annuum OX=4072 GN=T459_31261	3	542.97	-0.75998	1.1952e-08	97.767	yes	1.056	0.927	0.936	0.949	1.112	1.02
1708	AINVIPMLTPAVMEK	A0A1U8F694	Putative voltage-gated potassium channel subunit beta OS=Capsicum annuum OX=4072 GN=T459_31261	2	813.952	-0.88511	1.9379e-05	73.834	yes	1.08	0.843	1.068	0.825	1.129	1.056
1709	AINYLFTHFDR	A0A1U8EGF1	Coatomer subunit beta OS=Capsicum annuum OX=4072 GN=T459_03385	3	466.238	0.42749	0.0026207	54.286	yes	1.162	0.901	1.021	1.03	1.044	0.842
1710	AINYLLTHVDR	A0A1U8EI71	Coatomer subunit beta OS=Capsicum annuum OX=4072 GN=T459_26271	3	438.91	0.42958	0.00010697	83.045	yes	NA	NA	NA	NA	NA	NA
1711	AINYLLTHVDR	A0A1U8EI71	Coatomer subunit beta OS=Capsicum annuum OX=4072 GN=T459_26271	2	658.354	-1.3095	0.04311	45.908	yes	1.13	0.875	0.984	0.963	0.99	1.059
1712	AIPANTNMK	A0A1U8GBH5	Peptidyl-prolyl cis-trans isomerase CYP37, chloroplastic OS=Capsicum annuum OX=4072 GN=T459_08768	2	480.253	-1.6741	0.00078337	111.61	yes	0.997	0.942	0.975	0.973	1.069	1.044
1713	AIPANTNMK	A0A1U8GBH5	Peptidyl-prolyl cis-trans isomerase CYP37, chloroplastic OS=Capsicum annuum OX=4072 GN=T459_08768	3	320.504	-0.1902	0.042933	34.253	yes	NA	NA	NA	NA	NA	NA
1714	AIPESEAYK	A0A2G3AE27	Uncharacterized protein OS=Capsicum annuum OX=4072 GN=T459_00369	2	504.256	-2.4007	0.0014691	96.342	yes	0.808	0.735	0.775	1.226	1.339	1.117
1715	AIPGLNDIGK	A0A2G2XVC6	Uncharacterized protein OS=Capsicum annuum OX=4072 GN=T459_34669	2	499.779	-1.6333	0.011214	64.82	yes	NA	NA	NA	NA	NA	NA
1716	AIPHALPFHVDLK	A0A1U8DSM1	Uncharacterized protein OS=Capsicum annuum OX=4072 GN=T459_21743	4	365.212	0.43107	0.0011976	51.286	yes	0.96	1.131	0.952	0.942	1.09	0.925
1717	AIPNQQIISK	A0A1U8HCK2	Endothelial differentiation-related factor 1-like protein OS=Capsicum annuum OX=4072 GN=T459_20558	3	371.221	-0.98452	0.0059349	50.353	no	NA	NA	NA	NA	NA	NA
1718	AIPNQQIISK	A0A1U8HCK2	Endothelial differentiation-related factor 1-like protein OS=Capsicum annuum OX=4072 GN=T459_20558	2	556.327	-1.6383	0.025938	49.3	no	0.998	0.931	0.941	1.023	1.062	1.045
1719	AIPNQQIISK	A0A1U8HCK2	Endothelial differentiation-related factor 1-like protein OS=Capsicum annuum OX=4072 GN=T459_20558	3	371.221	-0.062874	0.0059349	50.353	no	0.912	1.037	0.964	1.03	0.978	1.08
1720	AIPNVDPPK	A0A1U8GQC6	ATP synthase subunit delta', mitochondrial OS=Capsicum annuum OX=4072 GN=T459_15156	3	317.515	0.43318	0.048379	33.263	yes	NA	NA	NA	NA	NA	NA
1721	AIPNVDPPK	A0A1U8GQC6	ATP synthase subunit delta', mitochondrial OS=Capsicum annuum OX=4072 GN=T459_15156	3	317.515	-0.23858	0.024321	40.352	yes	1.031	1.082	0.94	0.951	0.999	0.996
1722	AIPNVDPPK	A0A1U8GQC6	ATP synthase subunit delta', mitochondrial OS=Capsicum annuum OX=4072 GN=T459_15156	2	475.769	-1.9103	0.044868	48.091	yes	NA	NA	NA	NA	NA	NA
1723	AIPYASSLDEANQIVR	A0A2G2YJ03	Uncharacterized protein OS=Capsicum annuum OX=4072 GN=T459_24836	3	582.972	-1.0629	3.3754e-06	70.889	yes	0.942	0.978	0.959	1.129	1.005	0.987
1724	AIQDVLPNQNEVVVK	A0A1U8HAK9	Succinate--CoA ligase [ADP-forming] subunit beta, mitochondrial OS=Capsicum annuum OX=4072 GN=T459_18468	3	555.977	-0.58283	0.00065971	51.771	yes	1.067	0.884	0.95	1.028	1.068	1.003
1725	AIQDVLPNQNEVVVK	A0A1U8HAK9	Succinate--CoA ligase [ADP-forming] subunit beta, mitochondrial OS=Capsicum annuum OX=4072 GN=T459_18468	2	833.462	-0.99214	1.1282e-07	95.57	yes	1.042	0.897	0.999	0.982	1.142	0.938
1726	AIQDVLPNQNEVVVK	A0A1U8HAK9	Succinate--CoA ligase [ADP-forming] subunit beta, mitochondrial OS=Capsicum annuum OX=4072 GN=T459_18468	4	417.235	0.59908	0.021897	27.263	yes	NA	NA	NA	NA	NA	NA
1727	AIRMAESMISQK	A0A2G2Y610	Protein BTR1 OS=Capsicum annuum OX=4072 GN=T459_29620	2	691.344	-1.131	0.0010513	56.205	yes	0.994	0.971	0.967	0.955	1.119	0.995
1728	AISDGEYSSK	A0A1U8FLD2	DAG protein, chloroplastic OS=Capsicum annuum OX=4072 GN=T459_05738	2	528.746	-1.8703	3.4699e-05	120.77	yes	1.141	1.022	0.979	0.924	1.062	0.873
1729	AISDMYNELSTSDPASQK	A0A1U8F7R4	Long chain acyl-CoA synthetase 7, peroxisomal OS=Capsicum annuum OX=4072 GN=T459_32996	3	658.298	-0.64441	3.8348e-11	82.877	yes	0.913	0.943	1.025	1.063	1.075	0.981
1730	AISDMYNELSTSDPASQK	A0A1U8F7R4	Long chain acyl-CoA synthetase 7, peroxisomal OS=Capsicum annuum OX=4072 GN=T459_32996	3	652.967	-1.4932	7.8581e-32	137.81	yes	0.985	0.982	0.987	0.927	1.092	1.027
1731	AISDTGK	F2YL87	Lipoxygenase OS=Capsicum annuum OX=4072 GN=LOX	2	346.185	-1.4147	0.033299	75.109	yes	0.944	1.019	0.96	0.978	1.079	1.02
1732	AISDTGKDVLLFETPQLLER	F2YL87	Lipoxygenase OS=Capsicum annuum OX=4072 GN=LOX	3	749.074	-1.1928	1.5705e-66	175.77	yes	1.023	0.974	0.997	0.964	1.082	0.961
1733	AISDTGKDVLLFETPQLLER	F2YL87	Lipoxygenase OS=Capsicum annuum OX=4072 GN=LOX	2	1123.11	-0.7068	0.00018017	65.887	yes	1.006	0.918	1.026	0.926	1.113	1.011
1734	AISDTGKDVLLFETPQLLER	F2YL87	Lipoxygenase OS=Capsicum annuum OX=4072 GN=LOX	3	749.074	-1.4363	5.8953e-60	166.91	yes	1.025	0.972	0.915	0.967	1.123	0.998
1735	AISEHEISK	A0A1U8FSB9	Glucose-6-phosphate 1-dehydrogenase OS=Capsicum annuum OX=4072 GN=T459_07126	3	338.514	-0.23468	0.0064299	54.982	yes	1.009	0.892	1.101	0.977	1.138	0.883
1736	AISETPELQQYPSLR	A0A2G2ZI09	Dynamin-related protein 1E OS=Capsicum annuum OX=4072 GN=T459_14628	3	577.969		0.031963	26.825	yes	NA	NA	NA	NA	NA	NA
1737	AISEVEEREGK	A0A1U8EXA8	Protein STRICTOSIDINE SYNTHASE-LIKE 3 OS=Capsicum annuum OX=4072 GN=T459_28483	2	623.817		0.0094075	42.843	yes	NA	NA	NA	NA	NA	NA
1738	AISGQPPLK	A0A1U8GPZ4	Putative plastid-lipid-associated protein 3, chloroplastic OS=Capsicum annuum OX=4072 GN=T459_00923	2	455.771	-1.3368	0.041201	49.418	yes	0.999	1.015	0.994	1.007	1.068	0.917
1739	AISGQPPLK	A0A1U8GPZ4	Putative plastid-lipid-associated protein 3, chloroplastic OS=Capsicum annuum OX=4072 GN=T459_00923	3	304.183	0.2471	0.010687	48.794	yes	1.031	0.884	1.07	0.975	1.035	1.005
1740	AISGVQTVR	A0A1U8HGG1	Eukaryotic translation initiation factor 2 subunit 3 OS=Capsicum annuum OX=4072 GN=T459_02356	2	465.772	-0.19992	0.014927	64.711	no	1.107	0.824	0.96	0.966	1.041	1.101
1741	AISHLQSLPGGDIK	A0A2G3AJ30	Phytochrome B OS=Capsicum annuum OX=4072 GN=T459_02127	3	479.268	-0.16149	0.00078817	56.569	yes	NA	NA	NA	NA	NA	NA
1742	AISLGLDK	A0A2G2YVJ0	Eukaryotic translation initiation factor isoform 4G-1 OS=Capsicum annuum OX=4072 GN=T459_24524	2	408.745	-1.9645	0.047135	55.235	yes	NA	NA	NA	NA	NA	NA
1743	AISLLAPVMGSEITCSK	A0A2G2YC97	Serine/threonine-protein phosphatase 2A 65 kDa regulatory subunit A alpha isoform OS=Capsicum annuum OX=4072 GN=T459_26865	3	592.979	-1.5208	1.9982e-11	88.385	yes	1.09	0.932	1.056	0.915	1.044	0.962
1744	AISPVLVK	A0A2G2Z1J1	Elongation factor Ts, mitochondrial OS=Capsicum annuum OX=4072 GN=EFTS	2	413.773	-1.3008	0.01196	81.296	yes	1.061	0.867	0.918	1.051	1.091	1.013
1745	AISPVLVK	A0A2G2Z1J1	Elongation factor Ts, mitochondrial OS=Capsicum annuum OX=4072 GN=EFTS	3	276.185	-0.51471	0.0071887	65.252	yes	0.927	1.045	0.945	1.006	1.001	1.075
1746	AISTSNAYNDQFR	A0A1U8F4J3	Transaldolase 2 OS=Capsicum annuum OX=4072 GN=T459_14083	2	743.85	-1.7007	2.1138e-26	171.26	yes	0.969	0.979	1.05	0.983	1.091	0.929
1747	AISTSNAYNDQFR	A0A1U8F4J3	Transaldolase 2 OS=Capsicum annuum OX=4072 GN=T459_14083	3	496.236	-0.53004	9.7863e-06	92.19	yes	NA	NA	NA	NA	NA	NA
1748	AISTSNAYNDQFR	A0A1U8F4J3	Transaldolase 2 OS=Capsicum annuum OX=4072 GN=T459_14083	2	744.342	-1.5175	0.00093084	72.891	yes	1.061	1.022	0.952	0.855	1.091	1.019
1749	AITALTLR	A0A2G2YK41	Uncharacterized protein OS=Capsicum annuum OX=4072 GN=T459_25220	2	429.774	0.41812	0.033102	62.107	yes	NA	NA	NA	NA	NA	NA
1750	AITDSFGK	A0A1U8G0U4	Translocase of chloroplast OS=Capsicum annuum OX=4072 GN=T459_09005	2	419.719	-2.0101	0.0069135	97.431	no	1.075	0.976	1.02	0.951	1.035	0.944
1751	AITLGEVLNSK	A0A2G3AHD3	UPF0061 protein OS=Capsicum annuum OX=4072 GN=T459_01538	3	382.552	-0.027619	0.00058707	71.03	yes	0.96	1.009	0.875	1.027	1.024	1.105
1752	AITLGEVLNSK	A0A2G3AHD3	UPF0061 protein OS=Capsicum annuum OX=4072 GN=T459_01538	2	573.324	-1.9318	0.022035	52.247	yes	NA	NA	NA	NA	NA	NA
1753	AITLGEVLNSK	A0A2G3AHD3	UPF0061 protein OS=Capsicum annuum OX=4072 GN=T459_01538	3	382.224	-0.93115	0.00011672	82.417	yes	0.865	0.919	0.783	1.096	1.234	1.104
1754	AITPTPIDAK	A0A1U8ED44	Uncharacterized protein OS=Capsicum annuum OX=4072 GN=T459_24719	2	513.795	-3.4231	0.0053776	68.536	yes	1	0.945	0.979	0.957	1.19	0.929
1755	AITPTPIDAK	A0A1U8ED44	Uncharacterized protein OS=Capsicum annuum OX=4072 GN=T459_24719	3	342.866	-1.2556	0.0020614	61.56	yes	0.935	0.987	1.021	0.985	1.144	0.928
1756	AITQYIAHTYADK	A0A1U8GY32	Glutathione S-transferase OS=Capsicum annuum OX=4072 GN=T459_32893	3	498.924	0.64178	0.00013358	74.987	yes	0.93	0.786	0.874	1.121	1.286	1.003
1757	AITQYIAHTYADK	A0A1U8GY32	Glutathione S-transferase OS=Capsicum annuum OX=4072 GN=T459_32893	2	747.883	-0.43703	0.00013282	86.944	yes	0.946	0.913	0.901	1.041	1.24	0.959
1758	AITQYIAHTYADK	A0A1U8GY32	Glutathione S-transferase OS=Capsicum annuum OX=4072 GN=T459_32893	4	374.445	1.5483	0.0050845	38.3	yes	0.857	0.843	0.882	1.02	1.254	1.144
1759	AITQYIAHTYADK	A0A1U8GY32	Glutathione S-transferase OS=Capsicum annuum OX=4072 GN=T459_32893	3	498.924	-0.17482	0.0023741	49.298	yes	0.977	0.95	0.881	1.014	1.139	1.039
1760	AITSAGASEYR	A0A1U8H1W0	Structural maintenance of chromosomes protein OS=Capsicum annuum OX=4072 GN=T459_18476	2	563.28		0.0010178	60.255	yes	NA	NA	NA	NA	NA	NA
1761	AITSPVISAVGER	A0A1U8E6L7	Cullin-associated NEDD8-dissociated protein 1 OS=Capsicum annuum OX=4072 GN=T459_32507	2	650.367	-0.75504	2.1006e-14	135.65	yes	1.053	0.937	0.955	1.062	1.016	0.977
1762	AITSPVISAVGER	A0A1U8E6L7	Cullin-associated NEDD8-dissociated protein 1 OS=Capsicum annuum OX=4072 GN=T459_32507	3	433.914	0.65914	0.0014587	55.232	yes	NA	NA	NA	NA	NA	NA
1763	AIVANGLK	A0A2G2YZ00	Cytochrome 98A1 OS=Capsicum annuum OX=4072 GN=T459_22112	2	393.74	-2.206	0.042997	67.032	yes	NA	NA	NA	NA	NA	NA
1764	AIVAPALPPPEEDREK	A0A2G2ZVE1	Remorin OS=Capsicum annuum OX=4072 GN=T459_08060	3	577.981	-1.8524	1.1324e-28	139.58	yes	0.963	0.912	1.023	1.004	1.101	0.998
1765	AIVAPALPPPEEDREK	A0A2G2ZVE1	Remorin OS=Capsicum annuum OX=4072 GN=T459_08060	4	433.737	-0.89944	0.002726	39.629	yes	NA	NA	NA	NA	NA	NA
1766	AIVAPALPPPEEDREK	A0A2G2ZVE1	Remorin OS=Capsicum annuum OX=4072 GN=T459_08060	4	433.737	-1.0783	7.6754e-05	59.709	yes	NA	NA	NA	NA	NA	NA
1767	AIVAPALPPPEEDREK	A0A2G2ZVE1	Remorin OS=Capsicum annuum OX=4072 GN=T459_08060	3	577.981	-2.1598	2.5356e-15	118.51	yes	1.059	0.977	0.973	0.999	0.94	1.052
1768	AIVGANAFAHESGIHQDGMLK	B5LAV3	2-isopropylmalate synthase B OS=Capsicum annuum OX=4072 GN=T459_16615	4	542.274	-0.61274	1.6953e-27	120.4	yes	1.019	0.955	1.031	0.999	1.014	0.982
1769	AIVLTGSGGR	A0A2G2YUJ3	Glyoxysomal fatty acid beta-oxidation multifunctional protein MFP-a OS=Capsicum annuum OX=4072 GN=T459_24205	2	465.772	-0.3853	4.0403e-05	106.35	yes	1.009	0.956	0.918	1.058	1.068	0.99
1770	AIVNEVDFFSEK	C7E5X8	Transcription factor WRKY OS=Capsicum annuum OX=4072 GN=RKNIF2	3	466.57	-0.6594	0.00026088	76.326	yes	NA	NA	NA	NA	NA	NA
1771	AIVPALHQK	A0A1U8EVW6	Protein LUTEIN DEFICIENT 5, chloroplastic OS=Capsicum annuum OX=4072 GN=T459_30180	3	326.203	0.28131	0.0015035	77.058	yes	0.96	0.979	1.124	0.983	0.979	0.974
1772	AIVPLLEK	A0A2G3A6G8	RuBisCO large subunit-binding protein subunit alpha, chloroplastic OS=Capsicum annuum OX=4072 GN=T459_04948	2	441.787	-0.92689	0.02142	71.501	yes	NA	NA	NA	NA	NA	NA
1773	AIVQAVR	A0A2G3A3D9	Putative pyridoxal 5'-phosphate synthase subunit PDX1 OS=Capsicum annuum OX=4072 GN=T459_10865	2	378.74	-0.56353	0.033082	75.311	yes	0.377	0.388	0.4	1.619	1.547	1.668
1774	AIVVTGANGK	A0A1U8F3C9	Glyoxysomal fatty acid beta-oxidation multifunctional protein MFP-a OS=Capsicum annuum OX=4072 GN=T459_31376	2	465.766	-2.073	0.00045482	93.096	yes	NA	NA	NA	NA	NA	NA
1775	AIVVTGANGK	A0A1U8F3C9	Glyoxysomal fatty acid beta-oxidation multifunctional protein MFP-a OS=Capsicum annuum OX=4072 GN=T459_31376	3	310.847	-0.22962	0.01882	43.442	yes	0.97	0.978	0.993	0.962	1.142	0.955
1776	AIVVTQR	A0A2G2YFY5	Sulfite reductase [ferredoxin], chloroplastic OS=Capsicum annuum OX=4072 GN=T459_28151	2	393.745	-0.60397	0.044805	65.803	yes	1.037	0.957	0.908	0.93	1.159	1.01
1777	AIVVVGDK	A0A1U8FKT3	30S ribosomal protein S5, chloroplastic OS=Capsicum annuum OX=4072 GN=T459_05559	2	400.747	0.62515	0.0076223	87.639	yes	1.2	0.957	0.998	0.901	1.011	0.933
1778	AIVVVGDK	A0A1U8FKT3	30S ribosomal protein S5, chloroplastic OS=Capsicum annuum OX=4072 GN=T459_05559	3	267.501	1.2523	0.012738	54.157	yes	NA	NA	NA	NA	NA	NA
1779	AIWEELHNVVHAVDQMTTK	A0A2G3A0H0	Protein BOLA4, chloroplastic/mitochondrial OS=Capsicum annuum OX=4072 GN=T459_09840	4	556.032	0.10088	7.5813e-13	82.01	yes	1.164	0.86	0.865	0.958	0.988	1.165
1780	AIWMLDPGIK	A0A2G3AG58	Uncharacterized protein OS=Capsicum annuum OX=4072 GN=T459_01050	2	572.315	-1.6196	0.032813	46.462	yes	1.007	0.92	0.941	1.085	1.077	0.97
1781	AIWMLDPGIK	A0A2G3AG58	Uncharacterized protein OS=Capsicum annuum OX=4072 GN=T459_01050	3	381.879	0.33724	0.0030016	56.258	yes	NA	NA	NA	NA	NA	NA
1782	AIYDQYGEEGLK	A0A1U8FVS2	Uncharacterized protein OS=Capsicum annuum OX=4072 GN=T459_05596	2	693.333	-1.3409	2.658e-20	161.21	yes	0.395	0.384	0.354	1.515	1.77	1.582
1783	AIYDQYGEEGLK	A0A1U8FVS2	Uncharacterized protein OS=Capsicum annuum OX=4072 GN=T459_05596	3	462.558	-0.79677	0.0013703	56.205	yes	0.65	0.685	0.658	1.305	1.435	1.268
1784	AIYEIPSVK	A0A2G2Y751	26S proteasome non-ATPase regulatory subunit 12-like protein B (Fragment) OS=Capsicum annuum OX=4072 GN=T459_29993	2	510.292	-1.5514	0.014607	65.224	yes	0.937	0.99	0.89	1.074	1.119	0.989
1785	AIYPETFYR	A0A2G3A6M1	CSC1-like protein ERD4 OS=Capsicum annuum OX=4072 GN=T459_05000	2	580.293	-0.52566	0.0098085	72.042	yes	1.095	1.117	1.121	0.882	0.938	0.847
1786	AIYPLLTSYASPDK	A0A2G2YHA9	Uncharacterized protein OS=Capsicum annuum OX=4072 GN=T459_28592	3	513.608	-0.38878	0.0067595	37.613	yes	NA	NA	NA	NA	NA	NA
1787	AIYSHYK	A0A1U8E530	Annexin D4 OS=Capsicum annuum OX=4072 GN=T459_22197	3	294.489	-0.50037	0.032502	44.611	no	1.095	1.014	1.106	0.729	1.077	0.981
1788	AIYSHYK	A0A1U8E530	Annexin D4 OS=Capsicum annuum OX=4072 GN=T459_22197	2	441.229	-2.1936	0.017301	100.19	no	1.045	1.033	1.047	0.955	0.999	0.921
1789	AIYYLATDSLQSAR	A0A1U8ELM1	Uncharacterized protein OS=Capsicum annuum OX=4072 GN=T459_32593	3	524.607	-1.3744	6.0963e-07	98.368	yes	0.854	1.119	1.117	0.902	0.876	1.133
1790	AIYYLATDSLQSAR	A0A1U8ELM1	Uncharacterized protein OS=Capsicum annuum OX=4072 GN=T459_32593	3	524.607	0.19973	3.9323e-19	126.34	yes	0.983	0.938	1.006	1.093	1.008	0.973
1791	AIYYLATDSLQSAR	A0A1U8ELM1	Uncharacterized protein OS=Capsicum annuum OX=4072 GN=T459_32593	2	786.407	-1.5414	3.1922e-22	145.1	yes	0.957	0.958	0.956	0.981	1.091	1.058
1792	AKDDLAPTPVMPK	A0A1U8G303	Magnesium protoporphyrin IX methyltransferase, chloroplastic OS=Capsicum annuum OX=4072 GN=T459_10675	3	466.915	-1.6042	0.0026719	62.287	yes	1.12	1.115	1.025	0.856	0.963	0.921
1793	AKDDLAPTPVMPK	A0A1U8G303	Magnesium protoporphyrin IX methyltransferase, chloroplastic OS=Capsicum annuum OX=4072 GN=T459_10675	4	346.439	-1.0314	0.0059351	39.006	yes	0.966	0.95	1.144	0.939	1.019	0.981
1794	AKDDLAPTPVMPK	A0A1U8G303	Magnesium protoporphyrin IX methyltransferase, chloroplastic OS=Capsicum annuum OX=4072 GN=T459_10675	3	461.583	-1.9357	0.0030021	51.726	yes	NA	NA	NA	NA	NA	NA
1795	AKDIEVGTEYAPK	A0A1U8E8E8	Aquaporin PIP2-1 OS=Capsicum annuum OX=4072 GN=T459_22670	4	355.938	-0.75137	0.00069098	59.227	yes	0.977	0.952	1.066	0.836	1.107	1.062
1796	AKDIEVGTEYAPK	A0A1U8E8E8	Aquaporin PIP2-1 OS=Capsicum annuum OX=4072 GN=T459_22670	3	474.249	-1.5769	6.5596e-09	108.58	yes	1.065	0.956	0.91	0.964	1.156	0.949
1797	AKDLFEILMDENR	A0A1U8EBW0	Uncharacterized protein OS=Capsicum annuum OX=4072 GN=T459_32725	3	531.936	-0.54571	1.9938e-05	89.624	yes	0.881	0.795	0.784	1.122	1.297	1.121
1798	AKDPIVTGIEEK	A0A2G2XZ35	Putative prolyl 4-hydroxylase 7 OS=Capsicum annuum OX=4072 GN=T459_33385	3	433.91	-1.5088	0.004597	50.088	yes	NA	NA	NA	NA	NA	NA
1799	AKDVADSVLSDK	A0A2G2YXT7	PsbP domain-containing protein 5, chloroplastic OS=Capsicum annuum OX=4072 GN=T459_21718	3	416.554	-1.3	0.016409	40.475	yes	1.099	0.912	0.901	1.023	1.018	1.048
1800	AKEEGYAPGSYEK	A0A2G2ZJ96	Uncharacterized protein OS=Capsicum annuum OX=4072 GN=T459_15083	3	476.893	-1.0497	0.00114	61.409	yes	0.959	0.899	0.977	0.96	1.181	1.023
1801	AKENAPCIVFVDEIDAVGR	A0A2G2Z460	ATP-dependent zinc metalloprotease FTSH 8, chloroplastic OS=Capsicum annuum OX=4072 GN=T459_20256	3	701.689	-2.3636	2.2025e-08	71.853	yes	0.978	0.907	0.884	0.987	1.182	1.062
1802	AKEYVSLLK	A0A1U8HDK9	Photosystem I reaction center subunit V, chloroplastic OS=Capsicum annuum OX=4072 GN=T459_20985	3	350.878		0.00077603	73.499	yes	NA	NA	NA	NA	NA	NA
1803	AKGEAYETLK	Q2VT56	Probable glutathione-S-transferase OS=Capsicum annuum OX=4072 GN=T459_23080	3	370.533	-1.2001	0.017196	44.543	yes	0.795	0.803	0.788	1.184	1.321	1.11
1804	AKIPDPDAK	A0A2G3A2T4	Calnexin-like protein OS=Capsicum annuum OX=4072 GN=T459_10651	3	318.847	-1.3287	0.012136	52.579	yes	NA	NA	NA	NA	NA	NA
1805	AKPAVPIGGCYR	A0A1U8F6C5	Glucose-1-phosphate adenylyltransferase OS=Capsicum annuum OX=4072 GN=T459_19763	3	430.233	-0.76803	0.013751	42.068	yes	NA	NA	NA	NA	NA	NA
1806	AKPAVPLGANYR	A0A1U8HKG3	Glucose-1-phosphate adenylyltransferase OS=Capsicum annuum OX=4072 GN=T459_20436	3	419.903	-0.67945	0.00057596	68.786	yes	NA	NA	NA	NA	NA	NA
1807	AKPFGLVDDSELGVVTR	A0A1U8F6P2	Mitochondrial adenine nucleotide transporter ADNT1 OS=Capsicum annuum OX=4072 GN=T459_25144	3	601.66	-1.3616	3.7197e-07	70.783	yes	1.147	1.084	0.945	0.899	0.981	0.943
1808	AKPLEGAVVK	A0A2G3A881	Pistil-specific extensin-like protein OS=Capsicum annuum OX=4072 GN=T459_05547	3	337.878		0.0051139	60.255	yes	NA	NA	NA	NA	NA	NA
1809	AKPQVETTPVK	A0A2G2Z5L8	Uncharacterized protein OS=Capsicum annuum OX=4072 GN=T459_20829	3	399.899		0.0033857	58.172	yes	NA	NA	NA	NA	NA	NA
1810	AKPVISNGVSR	A0A1U8HDG2	Triphosphate tunel metalloenzyme 3 OS=Capsicum annuum OX=4072 GN=T459_17524	3	376.884	-1.377	0.0003324	79.492	yes	NA	NA	NA	NA	NA	NA
1811	AKPVSSGSPWYGPDR	A0A1U8GR74	Chlorophyll a-b binding protein, chloroplastic OS=Capsicum annuum OX=4072 GN=T459_11118	4	401.702	-0.33709	5.395e-06	71.08	yes	1.01	0.931	1.101	0.92	0.964	1.074
1812	AKPVSSGSPWYGPDR	A0A1U8GR74	Chlorophyll a-b binding protein, chloroplastic OS=Capsicum annuum OX=4072 GN=T459_11118	2	802.397	-2.0169	3.8671e-37	168.05	yes	1.048	0.953	0.98	0.922	1.12	0.978
1813	AKPVSSGSPWYGPDR	A0A1U8GR74	Chlorophyll a-b binding protein, chloroplastic OS=Capsicum annuum OX=4072 GN=T459_11118	3	535.267	-1.6244	6.9342e-08	93.106	yes	1.014	0.949	0.985	0.98	1.156	0.916
1814	AKPVSSGSPWYGPDR	A0A1U8GR74	Chlorophyll a-b binding protein, chloroplastic OS=Capsicum annuum OX=4072 GN=T459_11118	3	535.267	-1.9381	1.0628e-05	71.531	yes	NA	NA	NA	NA	NA	NA
1815	AKPVSSGSPWYGPDR	A0A1U8GR74	Chlorophyll a-b binding protein, chloroplastic OS=Capsicum annuum OX=4072 GN=T459_11118	3	535.267	-2.315	6.3035e-07	79.346	yes	0.861	1.035	1.481	0.807	0.974	0.842
1816	AKPVSSGSPWYGPDR	A0A1U8GR74	Chlorophyll a-b binding protein, chloroplastic OS=Capsicum annuum OX=4072 GN=T459_11118	4	401.702	-0.97355	0.017282	31.089	yes	NA	NA	NA	NA	NA	NA
1817	AKPVSSGSPWYGPDR	A0A1U8GR74	Chlorophyll a-b binding protein, chloroplastic OS=Capsicum annuum OX=4072 GN=T459_11118	3	535.267	-0.98474	0.014593	35.1	yes	NA	NA	NA	NA	NA	NA
1818	AKPVSSGSPWYGPDR	A0A1U8GR74	Chlorophyll a-b binding protein, chloroplastic OS=Capsicum annuum OX=4072 GN=T459_11118	3	535.267	-0.12074	2.821e-05	67.299	yes	0.949	0.981	0.968	1.084	1.019	0.999
1819	AKPVSSGSPWYGPDR	A0A1U8GR74	Chlorophyll a-b binding protein, chloroplastic OS=Capsicum annuum OX=4072 GN=T459_11118	3	535.267	-0.9289	3.7555e-07	84.046	yes	1.012	0.952	0.987	0.994	0.998	1.057
1820	AKPVSSGSPWYGPDR	A0A1U8GR74	Chlorophyll a-b binding protein, chloroplastic OS=Capsicum annuum OX=4072 GN=T459_11118	3	535.267	-1.2081	1.8772e-14	114.54	yes	0.986	0.96	0.911	1.103	0.814	1.227
1821	AKPVSSGSPWYGPDR	A0A1U8GR74	Chlorophyll a-b binding protein, chloroplastic OS=Capsicum annuum OX=4072 GN=T459_11118	3	535.267		0.00061834	47.301	yes	NA	NA	NA	NA	NA	NA
1822	AKPVSSGSPWYGPDR	A0A1U8GR74	Chlorophyll a-b binding protein, chloroplastic OS=Capsicum annuum OX=4072 GN=T459_11118	3	535.267	-1.5481	0.021849	33.751	yes	0.991	0.941	0.952	0.96	1.153	1.004
1823	AKPVSSGSPWYGPDR	A0A1U8GR74	Chlorophyll a-b binding protein, chloroplastic OS=Capsicum annuum OX=4072 GN=T459_11118	3	535.267	-2.338	4.4111e-07	82.837	yes	0.972	0.924	0.906	1.102	0.837	1.259
1824	AKPYPDPYLK	A0A1U8GHW7	Haloacid dehalogenase-like hydrolase domain-containing protein Sgpp OS=Capsicum annuum OX=4072 GN=T459_00764	3	397.885	-1.0413	0.0023871	66.056	yes	0.545	0.451	0.543	1.482	1.53	1.449
1825	ALAALFVHTPAGELQR	A0A2G2Y593	Kinesin-like protein KCA2 (Fragment) OS=Capsicum annuum OX=4072 GN=T459_29325	3	565.318	-0.42774	0.0011375	46.318	yes	1.109	0.969	0.964	0.92	1.129	0.908
1826	ALAASYFGSESAMLR	A0A1U8FW02	Chaperone protein ClpD, chloroplastic OS=Capsicum annuum OX=4072 GN=T459_10643	3	525.261	-0.43164	0.036114	27.734	yes	NA	NA	NA	NA	NA	NA
1827	ALAAYYFGSEEAMIR	A0A2G2Y8C9	Chaperone protein ClpC1, chloroplastic OS=Capsicum annuum OX=4072 GN=T459_30407	3	564.608	-0.31717	4.0077e-07	79.875	yes	1.054	0.928	1.027	0.996	1.018	0.978
1828	ALADGGITEDLLQDLDK	A0A2G2ZVR7	3-oxoacyl-[acyl-carrier-protein] synthase OS=Capsicum annuum OX=4072 GN=T459_08180	3	596.307	-1.6046	4.1147e-14	102.65	yes	1.092	0.909	1.045	0.934	1.036	0.984
1829	ALADPNADVR	A0A2G2Y873	Uncharacterized protein (Fragment) OS=Capsicum annuum OX=4072 GN=T459_30390	2	521.27	-1.267	0.035978	46.001	yes	0.942	0.907	0.888	1.106	1.118	1.038
1830	ALADYVHGK	A0A1U8G7A3	Alpha-galactosidase OS=Capsicum annuum OX=4072 GN=T459_09981	3	325.175	0.53492	0.022217	41.448	yes	NA	NA	NA	NA	NA	NA
1831	ALADYVHSK	A0A1U8GUH0	Alpha-galactosidase OS=Capsicum annuum OX=4072 GN=T459_14190	3	335.178	0.65832	0.028251	38.303	no	1.116	0.981	1.154	0.914	0.891	0.946
1832	ALADYVHSK	A0A1U8GUH0	Alpha-galactosidase OS=Capsicum annuum OX=4072 GN=T459_14190	3	335.178	-1.0999	0.014697	45.368	no	1.167	1.165	1.055	0.85	0.899	0.865
1833	ALAEAGLTAENIHAVEVVGSSSR	A0A1U8F4Q1	Heat shock 70 kDa protein 14 OS=Capsicum annuum OX=4072 GN=T459_30559	3	761.064		0.0075933	28.035	yes	NA	NA	NA	NA	NA	NA
1834	ALAEAGLTTENIHAVEVVGSSSR	A0A1U8EVK6	Heat shock 70 kDa protein 14 OS=Capsicum annuum OX=4072 GN=T459_30561	3	771.068	-2.0632	1.3707e-30	113.71	yes	0.978	0.934	0.972	0.979	1.019	1.118
1835	ALAEAGLTTENIHAVEVVGSSSR	A0A1U8EVK6	Heat shock 70 kDa protein 14 OS=Capsicum annuum OX=4072 GN=T459_30561	4	578.553	-1.6944	3.0767e-08	59.539	yes	0.94	0.989	0.957	1.086	1.104	0.925
1836	ALAEAVTER	A0A1U8EDN2	Uncharacterized protein OS=Capsicum annuum OX=4072 GN=T459_23505	2	480.261	-0.55504	0.012352	68.657	yes	0.932	0.974	1.056	1.036	1.063	0.939
1837	ALAENEGEGLAK	A0A2G2ZJS5	Dihydrolipoyl dehydrogenase 2, chloroplastic OS=Capsicum annuum OX=4072 GN=T459_15190	2	601.799	-2.4278	0.011037	55.04	yes	0.988	1.01	1.025	0.935	1.039	1.003
1838	ALAENEGEGLAK	A0A2G2ZJS5	Dihydrolipoyl dehydrogenase 2, chloroplastic OS=Capsicum annuum OX=4072 GN=T459_15190	2	601.307	-2.396	5.0812e-12	114.7	yes	1.079	1.054	1.032	0.858	1.051	0.925
1839	ALAENEGEGLAK	A0A2G2ZJS5	Dihydrolipoyl dehydrogenase 2, chloroplastic OS=Capsicum annuum OX=4072 GN=T459_15190	3	401.207	-0.85311	0.0016313	55.261	yes	NA	NA	NA	NA	NA	NA
1840	ALAENEGEGLAK	A0A2G2ZJS5	Dihydrolipoyl dehydrogenase 2, chloroplastic OS=Capsicum annuum OX=4072 GN=T459_15190	2	601.307	-1.4547	3.7029e-13	124.51	yes	1.1	1.022	1.025	0.867	1.108	0.877
1841	ALAENEGEGLAK	A0A2G2ZJS5	Dihydrolipoyl dehydrogenase 2, chloroplastic OS=Capsicum annuum OX=4072 GN=T459_15190	3	401.207	0.1207	0.00020313	80.69	yes	1.167	0.767	0.963	0.955	1.07	1.079
1842	ALAEQLFDDDK	A0A1U8G5J6	Chaperone protein ClpB1 OS=Capsicum annuum OX=4072 GN=T459_10363	2	632.806	-1.719	4.4204e-07	104.24	yes	0.395	0.389	0.371	1.602	1.687	1.555
1843	ALAEQLFDDDK	A0A1U8G5J6	Chaperone protein ClpB1 OS=Capsicum annuum OX=4072 GN=T459_10363	3	422.207	0.070702	0.00045846	69.721	yes	0.376	0.282	0.362	1.647	1.805	1.528
1844	ALAEQLFDDDKLMVR	A0A1U8G5J6	Chaperone protein ClpB1 OS=Capsicum annuum OX=4072 GN=T459_10363	3	588.638	-1.7275	3.7396e-20	122.75	yes	0.336	0.34	0.388	1.603	1.697	1.635
1845	ALAHVGGDLAK	A0A2G3AEK0	Acid beta-fructofuranosidase OS=Capsicum annuum OX=4072 GN=T459_00544	2	526.298	-2.1246	2.0783e-08	124.42	yes	1.041	0.973	1.151	0.897	0.977	0.96
1846	ALAHVGGDLAK	A0A2G3AEK0	Acid beta-fructofuranosidase OS=Capsicum annuum OX=4072 GN=T459_00544	3	351.201	-0.47254	0.0010259	62.466	yes	1.165	1.036	1.031	0.79	1.093	0.885
1847	ALAIVEPESK	A0A1U8F3B7	Remorin OS=Capsicum annuum OX=4072 GN=T459_16405	2	528.8	-1.6441	3.1367e-05	112.13	yes	NA	NA	NA	NA	NA	NA
1848	ALAIYSPHEGGYEGR	A0A1U8G5D4	NAD(P)H-quinone oxidoreductase subunit N, chloroplastic OS=Capsicum annuum OX=4072 GN=T459_07860	3	540.599	-0.89712	8.9337e-05	63.185	yes	0.982	0.966	0.96	1.031	1.004	1.059
1849	ALALDADNLVPK	A0A1U8FBI6	Pathogenesis-related protein STH-21 OS=Capsicum annuum OX=4072 GN=T459_31175	2	620.351	-1.7255	6.8915e-22	162.49	yes	0.297	0.294	0.324	1.626	1.8	1.66
1850	ALALDADNLVPK	A0A1U8FBI6	Pathogenesis-related protein STH-21 OS=Capsicum annuum OX=4072 GN=T459_31175	3	413.903	-0.86868	0.00027841	69.721	yes	0.3	0.305	0.219	1.735	1.741	1.701
1851	ALALNPQFLQGIK	A0A2G3ADX0	Puromycin-sensitive aminopeptidase OS=Capsicum annuum OX=4072 GN=T459_00265	3	471.614	-0.099867	1.218e-12	113.22	yes	NA	NA	NA	NA	NA	NA
1852	ALALNPQFLQGIK	A0A2G3ADX0	Puromycin-sensitive aminopeptidase OS=Capsicum annuum OX=4072 GN=T459_00265	2	706.917	-1.7588	5.2115e-65	206.1	yes	1.045	1.001	0.994	0.968	1.009	0.983
1853	ALALNPQFLQGIK	A0A2G3ADX0	Puromycin-sensitive aminopeptidase OS=Capsicum annuum OX=4072 GN=T459_00265	4	353.962	0.10849	0.022876	28.903	yes	0.884	1.149	0.781	0.984	1.194	1.009
1854	ALANQPLSVAIEASTR	A0A2G2ZSW4	Papaya proteinase 4 OS=Capsicum annuum OX=4072 GN=T459_13511	3	547.637	-0.76153	0.00096824	46.873	yes	0.984	0.957	1.031	1.004	1.009	1.016
1855	ALARPPSYTTK	A0A1U8GPW8	Eukaryotic translation initiation factor 5 OS=Capsicum annuum OX=4072 GN=T459_11702	3	402.228	-1.2071	0.014817	43.68	yes	NA	NA	NA	NA	NA	NA
1856	ALASEMAPNTR	A0A1U8EYX0	Tropinone reductase-like 3 OS=Capsicum annuum OX=4072 GN=T459_29077	2	580.79	-1.9336	3.1402e-08	113.38	yes	0.981	0.938	0.961	1.062	1.03	1.028
1857	ALASEMAPNTR	A0A1U8EYX0	Tropinone reductase-like 3 OS=Capsicum annuum OX=4072 GN=T459_29077	3	387.529	-0.78726	0.018184	37.995	yes	NA	NA	NA	NA	NA	NA
1858	ALASEMAPNTR	A0A1U8EYX0	Tropinone reductase-like 3 OS=Capsicum annuum OX=4072 GN=T459_29077	3	392.861		0.00083305	57.149	yes	NA	NA	NA	NA	NA	NA
1859	ALASEMAPNTR	A0A1U8EYX0	Tropinone reductase-like 3 OS=Capsicum annuum OX=4072 GN=T459_29077	2	588.788	-1.9854	0.0015498	64.103	yes	0.875	0.956	0.995	1.054	1.123	0.997
1860	ALASHPQK	A0A1U8EMA7	4-hydroxy-4-methyl-2-oxoglutarate aldolase OS=Capsicum annuum OX=4072 GN=T459_24631	3	284.496	0.33754	0.018607	47.849	yes	NA	NA	NA	NA	NA	NA
1861	ALASLGNSAPK	A0A2G2Y0K6	Elongation factor Tu OS=Capsicum annuum OX=4072 GN=T459_32863	3	343.529	-0.040083	0.0014711	57.785	no	NA	NA	NA	NA	NA	NA
1862	ALASLGNSAPK	A0A2G2Y0K6	Elongation factor Tu OS=Capsicum annuum OX=4072 GN=T459_32863	3	343.857	-0.89977	0.0027764	56.043	no	NA	NA	NA	NA	NA	NA
1863	ALASLGNSAPK	A0A2G2Y0K6	Elongation factor Tu OS=Capsicum annuum OX=4072 GN=T459_32863	2	515.282	-2.5775	0.0010573	79.492	no	0.973	1.001	0.974	0.95	1.111	0.991
1864	ALASNGDIEPLR	A0A2G2YIM9	Putative bifunctional methylthioribulose-1-phosphate dehydratase/enolase-phosphatase E1 OS=Capsicum annuum OX=4072 GN=T459_24712	2	628.828	-1.5421	0.00096532	83.204	yes	1.045	1.048	0.856	1.039	1.067	0.945
1865	ALASTLDEEELADLR	A0A2G2ZMA0	Calcium-dependent protein kinase 16 OS=Capsicum annuum OX=4072 GN=T459_11571	2	823.418	-1.3423	1.1584e-09	100.11	yes	0.748	0.887	0.874	1.231	1.12	1.14
1866	ALASVQK	A0A2G2Y1D8	Ubiquitin-activating enzyme E1 2 OS=Capsicum annuum OX=4072 GN=T459_32572	2	358.719	-1.0438	0.033299	75.109	yes	0.916	0.754	0.838	1.095	1.292	1.106
1867	ALAVDSQAVQR	A0A2G2YEH5	AP-1 complex subunit gamma OS=Capsicum annuum OX=4072 GN=T459_27586	2	579.317	-1.2446	0.0012051	74.611	yes	0.959	0.969	0.941	0.995	1.095	1.041
1868	ALAVDSQAVQR	A0A2G2YEH5	AP-1 complex subunit gamma OS=Capsicum annuum OX=4072 GN=T459_27586	3	386.547	-0.027714	0.033223	33.875	yes	NA	NA	NA	NA	NA	NA
1869	ALAVSGTPAILR	A0A1U8F295	Uncharacterized protein OS=Capsicum annuum OX=4072 GN=T459_03948	2	584.856	-1.156	5.0692e-08	107.09	yes	0.942	0.977	0.997	1.041	1.116	0.927
1870	ALAVSGTPAILR	A0A1U8F295	Uncharacterized protein OS=Capsicum annuum OX=4072 GN=T459_03948	3	390.24	-0.18944	0.0095798	41.689	yes	NA	NA	NA	NA	NA	NA
1871	ALAVSGTPAILR	A0A1U8F295	Uncharacterized protein OS=Capsicum annuum OX=4072 GN=T459_03948	2	584.856	-2.2367	8.6255e-12	110.31	yes	0.942	0.983	0.97	0.993	1.061	1.052
1872	ALAVSGTPAILR	A0A1U8F295	Uncharacterized protein OS=Capsicum annuum OX=4072 GN=T459_03948	3	390.24	-0.64448	0.00027494	71.03	yes	0.861	0.99	0.941	1.192	1.067	0.95
1873	ALAYLHENIEPK	A0A1U8DV09	Putative serine/threonine-protein kinase OS=Capsicum annuum OX=4072 GN=T459_33924	3	466.586	-1.8114	7.3839e-06	96.229	yes	NA	NA	NA	NA	NA	NA
1874	ALAYSCLT	A0A1U8G3L8	Malate dehydrogenase OS=Capsicum annuum OX=4072 GN=T459_07792	2	449.721	-0.2576	0.022062	70.912	yes	NA	NA	NA	NA	NA	NA
1875	ALCADHNVSLITVPNAK	A0A1U8DVK6	40S ribosomal protein S12 OS=Capsicum annuum OX=4072 GN=T459_32428	3	608.649	-1.7063	3.2362e-15	109.48	yes	1.044	1.049	0.96	0.956	1.036	0.954
1876	ALCADHNVSLITVPNAK	A0A1U8DVK6	40S ribosomal protein S12 OS=Capsicum annuum OX=4072 GN=T459_32428	4	456.738	-0.32904	9.4304e-11	81.448	yes	1.102	0.923	1.021	0.983	1.06	0.912
1877	ALCADHNVSLITVPNAK	A0A1U8DVK6	40S ribosomal protein S12 OS=Capsicum annuum OX=4072 GN=T459_32428	3	608.649	-1.5479	6.7926e-14	101.42	yes	NA	NA	NA	NA	NA	NA
1878	ALCADHNVSLITVPNAK	A0A1U8DVK6	40S ribosomal protein S12 OS=Capsicum annuum OX=4072 GN=T459_32428	3	608.321	-1.7761	6.2751e-24	126.16	yes	0.997	1.042	1.01	0.937	1.106	0.908
1879	ALCADHNVSLITVPNAK	A0A1U8DVK6	40S ribosomal protein S12 OS=Capsicum annuum OX=4072 GN=T459_32428	4	456.492	-0.51196	5.6982e-08	75.316	yes	1.01	0.966	1.017	0.902	1.079	1.025
1880	ALCADHNVSLITVPNAK	A0A1U8DVK6	40S ribosomal protein S12 OS=Capsicum annuum OX=4072 GN=T459_32428	5	365.395	-0.56286	3.5785e-15	108.58	yes	0.941	1.058	0.997	0.936	1.108	0.959
1881	ALCLVMTGQDVTR	A0A2G3AHD3	UPF0061 protein OS=Capsicum annuum OX=4072 GN=T459_01538	3	488.583	-0.11239	0.051228	25.978	yes	NA	NA	NA	NA	NA	NA
1882	ALDAIGVGDQLR	A0A1U8GQN7	Uncharacterized protein OS=Capsicum annuum OX=4072 GN=T459_00717	2	614.338	-1.8001	0.00076412	81.278	yes	NA	NA	NA	NA	NA	NA
1883	ALDAIGVGDQLR	A0A1U8GQN7	Uncharacterized protein OS=Capsicum annuum OX=4072 GN=T459_00717	3	409.895	-0.27398	0.0098125	41.48	yes	NA	NA	NA	NA	NA	NA
1884	ALDAIGVGNDLR	A0A2G2ZA79	Uncharacterized protein OS=Capsicum annuum OX=4072 GN=T459_16968	2	607.33	-1.2625	0.0011235	69.229	yes	1.042	0.93	1.023	0.954	1.053	0.998
1885	ALDAIGVGNDLR	A0A2G2ZA79	Uncharacterized protein OS=Capsicum annuum OX=4072 GN=T459_16968	3	405.223	0.31124	0.026125	34	yes	NA	NA	NA	NA	NA	NA
1886	ALDCAAFWVK	A0A1U8EIS9	Uncharacterized protein OS=Capsicum annuum OX=4072 GN=T459_03460	3	394.199	0.2418	0.0053925	51.445	yes	NA	NA	NA	NA	NA	NA
1887	ALDCAAFWVK	A0A1U8EIS9	Uncharacterized protein OS=Capsicum annuum OX=4072 GN=T459_03460	2	590.795	-0.93255	4.1495e-05	105.98	yes	1	0.959	0.987	0.971	1.052	1.032
1888	ALDEYASHR	A0A2G2ZJX6	26S proteasome non-ATPase regulatory subunit 1 homolog OS=Capsicum annuum OX=4072 GN=T459_15304	3	354.505	-0.31978	0.00061924	86.67	yes	1.011	1.046	0.731	1.003	1.371	0.838
1889	ALDEYASHR	A0A2G2ZJX6	26S proteasome non-ATPase regulatory subunit 1 homolog OS=Capsicum annuum OX=4072 GN=T459_15304	2	531.254	-0.81248	0.041052	49.472	yes	0.99	0.959	1.006	1.078	0.993	0.975
1890	ALDGECVGTLFHR	A0A2G2Z8V8	Delta-1-pyrroline-5-carboxylate synthase OS=Capsicum annuum OX=4072 GN=T459_16482	3	492.242	0.035178	1.6188e-14	126.12	yes	1.005	1.006	0.825	0.892	1.194	1.079
1891	ALDHYESASPGR	A0A1U8GUC7	Putative alkaline/neutral invertase B OS=Capsicum annuum OX=4072 GN=T459_17202	3	434.874	-0.19837	0.0016313	55.261	yes	0.953	1.186	0.932	0.988	1.079	0.862
1892	ALDINER	A0A2G2XYY8	Uncharacterized protein OS=Capsicum annuum OX=4072 GN=T459_33442	2	415.722	-0.40812	0.041066	67.897	no	NA	NA	NA	NA	NA	NA
1893	ALDISLK	A0A2G2YBZ5	Nicotinate-nucleotide pyrophosphorylase [carboxylating] OS=Capsicum annuum OX=4072 GN=T459_26716	2	380.234		0.055305	58.981	yes	NA	NA	NA	NA	NA	NA
1894	ALDLGPDGIMFPMIDSPK	A0A1U8F295	Uncharacterized protein OS=Capsicum annuum OX=4072 GN=T459_03948	3	650.318	-1.1612	2.4115e-06	66.809	yes	0.763	0.809	1.157	1.111	1.11	1.051
1895	ALDLGPDGIMFPMIDSPK	A0A1U8F295	Uncharacterized protein OS=Capsicum annuum OX=4072 GN=T459_03948	3	644.986	-0.99924	3.3184e-11	83.751	yes	1.034	0.959	0.962	1.027	1.036	0.982
1896	ALDLGPDGIMFPMIDSPK	A0A1U8F295	Uncharacterized protein OS=Capsicum annuum OX=4072 GN=T459_03948	3	639.655	-1.3496	1.2226e-12	96.773	yes	1.058	0.995	1.05	0.962	0.985	0.949
1897	ALDLGPDGIMFPMIDSPK	A0A1U8F295	Uncharacterized protein OS=Capsicum annuum OX=4072 GN=T459_03948	4	479.993	-0.75672	1.972e-05	59.728	yes	1.06	0.986	0.816	0.931	1.044	1.164
1898	ALDLPVYFGDAGSR	A0A2G2YXI5	K(+) efflux antiporter 1, chloroplastic OS=Capsicum annuum OX=4072 GN=T459_21757	2	740.875	-0.90282	1.7202e-05	92.269	yes	0.93	0.888	0.936	1.028	1.138	1.081
1899	ALDLPVYFGDAGSR	A0A2G2YXI5	K(+) efflux antiporter 1, chloroplastic OS=Capsicum annuum OX=4072 GN=T459_21757	3	494.253	0.045862	0.00056706	59.709	yes	0.94	0.82	1.016	1.084	0.929	1.21
1900	ALDLVPEK	A0A2G2ZPT4	Fructose-1,6-bisphosphatase, cytosolic OS=Capsicum annuum OX=4072 GN=T459_12404	2	442.758	-1.7414	0.031611	63.216	yes	NA	NA	NA	NA	NA	NA
1901	ALDLVPEK	A0A2G2ZPT4	Fructose-1,6-bisphosphatase, cytosolic OS=Capsicum annuum OX=4072 GN=T459_12404	3	295.508	-0.0011631	0.01146	55.531	yes	0.992	1.019	0.943	0.951	1.104	0.991
1902	ALDLVPEK	A0A2G2ZPT4	Fructose-1,6-bisphosphatase, cytosolic OS=Capsicum annuum OX=4072 GN=T459_12404	2	442.758	-1.0244	0.010147	83.948	yes	NA	NA	NA	NA	NA	NA
1903	ALDLVPEK	A0A2G2ZPT4	Fructose-1,6-bisphosphatase, cytosolic OS=Capsicum annuum OX=4072 GN=T459_12404	3	295.508	0.73546	0.014014	52.786	yes	1.065	0.939	1.046	0.925	1.037	0.988
1904	ALDLVPTK	A0A2G2Y8E5	Fructose-1,6-bisphosphatase, cytosolic OS=Capsicum annuum OX=4072 GN=T459_30461	3	286.176	-1.4837	0.029451	42.599	yes	1.044	0.911	1.002	1.002	1.056	0.985
1905	ALDLVPTK	A0A2G2Y8E5	Fructose-1,6-bisphosphatase, cytosolic OS=Capsicum annuum OX=4072 GN=T459_30461	2	428.761	-1.9894	0.039176	57.59	yes	NA	NA	NA	NA	NA	NA
1906	ALDMDEVISGIIEK	A0A1U8F094	Uncharacterized protein OS=Capsicum annuum OX=4072 GN=T459_00335	3	511.601	-0.18052	0.00046386	61.409	yes	NA	NA	NA	NA	NA	NA
1907	ALDMDLDPIK	A0A2G3AGQ9	Putative carboxylesterase 8 OS=Capsicum annuum OX=4072 GN=T459_01301	3	377.53	0.59862	0.0053925	51.445	yes	1.045	0.977	1.021	0.966	0.969	1.022
1908	ALDMDLDPIK	A0A2G3AGQ9	Putative carboxylesterase 8 OS=Capsicum annuum OX=4072 GN=T459_01301	2	565.792	-1.607	0.035978	46.001	yes	1.123	1.063	0.956	0.981	0.961	0.916
1909	ALDMNAAEDAIVR	A0A1U8FC73	Thiamine thiazole synthase, chloroplastic OS=Capsicum annuum OX=4072 GN=THI1	2	694.846	-1.8043	0.00045781	78.814	yes	1.336	1.303	1.339	0.694	0.637	0.692
1910	ALDMNAAEDAIVR	A0A1U8FC73	Thiamine thiazole synthase, chloroplastic OS=Capsicum annuum OX=4072 GN=THI1	3	463.566	-0.60945	1.3503e-05	89.46	yes	1.16	1.172	1.06	0.924	0.911	0.773
1911	ALDNDQNHIPFR	A0A2G2Z0V5	Uncharacterized protein OS=Capsicum annuum OX=4072 GN=T459_19169	3	480.572	-0.27753	0.01093	40.475	yes	1.005	0.95	0.952	0.996	1.13	0.967
1912	ALDNYNIGDEVR	A0A2G3A5X1	Protease Do-like 8, chloroplastic OS=Capsicum annuum OX=4072 GN=T459_04750	2	689.834	-1.7551	0.0034627	60.161	yes	1.128	0.902	0.886	1.024	1.026	1.035
1913	ALDTLDLSWNR	A0A1U8FNE1	Uncharacterized protein OS=Capsicum annuum OX=4072 GN=T459_06473	2	652.336	-1.5556	2.8515e-08	119.74	yes	0.988	0.913	0.995	0.976	1.081	1.047
1914	ALDWAIDEK	A0A2G2ZYR9	Clp protease-related protein, chloroplastic OS=Capsicum annuum OX=4072 GN=T459_09223	2	530.769	-1.8052	0.00074227	125.75	yes	1.059	0.988	0.979	0.955	1.055	0.963
1915	ALDWAIDEK	A0A2G2ZYR9	Clp protease-related protein, chloroplastic OS=Capsicum annuum OX=4072 GN=T459_09223	3	354.182	-0.33195	0.0064299	54.982	yes	0.914	0.809	1.101	1.06	1.098	1.017
1916	ALDWALEEK	A0A1U8GJ95	Clp protease-related protein, chloroplastic OS=Capsicum annuum OX=4072 GN=T459_00460	3	358.854	-0.73157	0.0025526	71.451	yes	0.981	1.106	0.94	0.963	0.981	1.028
1917	ALEDAVAVLDK	A0A2G2XUT9	T-complex protein 1 subunit gamma OS=Capsicum annuum OX=4072 GN=T459_34871	3	381.88	0.13569	0.0013367	59.198	yes	NA	NA	NA	NA	NA	NA
1918	ALEDAVAVLDK	A0A2G2XUT9	T-complex protein 1 subunit gamma OS=Capsicum annuum OX=4072 GN=T459_34871	2	572.316	-2.0287	0.0012051	74.611	yes	1.054	0.956	0.998	0.938	1.095	0.958
1919	ALEEAEALK	A0A1U8GRT2	Uncharacterized protein OS=Capsicum annuum OX=4072 GN=T459_34868	2	487.264	-1.4567	0.0010853	117.7	yes	1.003	0.978	0.973	0.971	1.055	1.02
1920	ALEEAEALK	A0A1U8GRT2	Uncharacterized protein OS=Capsicum annuum OX=4072 GN=T459_34868	3	325.178	0.39589	0.0046064	58.981	yes	NA	NA	NA	NA	NA	NA
1921	ALEEAIYMK	A0A1U8GAV6	Uncharacterized protein OS=Capsicum annuum OX=4072 GN=T459_13336	2	534.276	-1.4946	0.00078337	111.61	yes	0.968	0.995	0.975	0.962	1.102	0.997
1922	ALEEAYEK	A0A2G3ADN2	1-aminocyclopropane-1-carboxylate synthase OS=Capsicum annuum OX=4072 GN=T459_00227	2	476.735	-1.3954	0.01233	80.755	yes	NA	NA	NA	NA	NA	NA
1923	ALEENCTPK	A0A2G2ZJU5	Putative methionine--tRNA ligase OS=Capsicum annuum OX=4072 GN=T459_15216	2	531.25	-2.4476	0.036066	51.276	yes	0.902	1.089	1.01	0.948	1.08	0.971
1926	ALEGLSFESGANLQK	A0A1U8GN08	Uncharacterized protein OS=Capsicum annuum OX=4072 GN=T459_12402	3	521.939	-1.1754	3.2155e-07	82.069	yes	0.943	1.001	0.988	0.949	1.096	1.023
1927	ALEIDPDNK	A0A1U8H2D5	70 kDa peptidyl-prolyl isomerase OS=Capsicum annuum OX=4072 GN=T459_18359	2	507.759	-1.7496	0.0113	70.056	yes	NA	NA	NA	NA	NA	NA
1928	ALEIDPDNK	A0A1U8H2D5	70 kDa peptidyl-prolyl isomerase OS=Capsicum annuum OX=4072 GN=T459_18359	3	338.842	-0.1006	0.012598	46.462	yes	NA	NA	NA	NA	NA	NA
1929	ALEIDPDNKDVK	A0A1U8H2D5	70 kDa peptidyl-prolyl isomerase OS=Capsicum annuum OX=4072 GN=T459_18359	3	452.905	-1.419	5.6735e-08	101.53	yes	0.908	0.796	0.823	1.107	1.237	1.129
1930	ALEIDPDNKDVK	A0A1U8H2D5	70 kDa peptidyl-prolyl isomerase OS=Capsicum annuum OX=4072 GN=T459_18359	4	339.931	-0.24443	0.0038853	45.433	yes	NA	NA	NA	NA	NA	NA
1931	ALEIHEEIYR	A0A2G2XVT4	Protein, chloroplastic OS=Capsicum annuum OX=4072 GN=T459_34548	3	424.891	0.33561	0.0014559	67.334	yes	NA	NA	NA	NA	NA	NA
1932	ALEIIPR	A0A2G2ZAR3	T-complex protein 1 subunit eta OS=Capsicum annuum OX=4072 GN=T459_17148	2	406.255	-0.0045418	0.019436	86.472	yes	1.055	1.001	0.982	0.925	1.092	0.946
1933	ALEIYEK	A0A2G2YM25	GDSL esterase/lipase CPRD49 OS=Capsicum annuum OX=4072 GN=T459_25896	2	433.237	-1.5562	0.024564	82.452	yes	1.022	1.011	1.054	0.993	1.026	0.894
1934	ALEIYEK	A0A2G2YM25	GDSL esterase/lipase CPRD49 OS=Capsicum annuum OX=4072 GN=T459_25896	3	289.16	0.051747	0.013444	60.788	yes	0.82	0.925	1.084	1.126	1.018	1.027
1935	ALELALK	A0A1U8G5L2	Chaperonin CPN60-2, mitochondrial OS=Capsicum annuum OX=4072 GN=T459_07591	3	253.165	0.94105	0.012565	62.714	no	1.016	0.983	0.95	0.959	1.081	1.011
1936	ALELCNEEQK	A0A1U8G2J5	Farnesyl pyrophosphate synthase 1 OS=Capsicum annuum OX=4072 GN=T459_08678	2	617.293	-1.475	0.00057239	87.667	yes	1.017	0.923	0.966	0.961	1.068	1.066
1937	ALELHPDKR	A0A1U8EDA7	Uncharacterized protein OS=Capsicum annuum OX=4072 GN=T459_03183	4	270.406	-0.15809	0.011212	43.083	yes	NA	NA	NA	NA	NA	NA
1938	ALELPEVYMSANK	A0A1U8G571	Uncharacterized protein OS=Capsicum annuum OX=4072 GN=T459_07818	3	494.25	-0.23026	0.0047102	40.475	yes	1.003	0.957	0.957	1.004	1.043	1.037
1939	ALELYMGEK	A0A2G2ZHF9	Uncharacterized protein OS=Capsicum annuum OX=4072 GN=T459_14431	2	527.268	-1.3643	0.0013183	99.568	yes	NA	NA	NA	NA	NA	NA
1940	ALELYMGEK	A0A2G2ZHF9	Uncharacterized protein OS=Capsicum annuum OX=4072 GN=T459_14431	3	351.848	0.4789	0.011793	47.187	yes	NA	NA	NA	NA	NA	NA
1941	ALENTSIPVGASPEEK	A0A2G2ZZ45	Tripeptidyl-peptidase 2 OS=Capsicum annuum OX=4072 GN=T459_09358	3	547.949	-0.45355	7.1331e-09	97.065	yes	1.081	0.969	1.039	0.95	1.021	0.94
1942	ALENTSIPVGASPEEK	A0A2G2ZZ45	Tripeptidyl-peptidase 2 OS=Capsicum annuum OX=4072 GN=T459_09358	2	821.42	-0.96266	1.1132e-07	90.348	yes	0.996	0.974	0.939	1.057	1.027	1.008
1943	ALEPILPPDDDFPYTVR	A0A1U8DRK9	Polyribonucleotide nucleotidyltransferase 1, chloroplastic OS=Capsicum annuum OX=4072 GN=T459_21393	3	653.335	-0.93528	0.00048424	51.495	yes	NA	NA	NA	NA	NA	NA
1944	ALEPILPPDDDFPYTVR	A0A1U8DRK9	Polyribonucleotide nucleotidyltransferase 1, chloroplastic OS=Capsicum annuum OX=4072 GN=T459_21393	3	653.335	-0.37096	1.9311e-10	79.837	yes	0.981	1.025	0.967	1.086	0.947	0.994
1945	ALEPILPPDDDFPYTVR	A0A1U8DRK9	Polyribonucleotide nucleotidyltransferase 1, chloroplastic OS=Capsicum annuum OX=4072 GN=T459_21393	2	979.499	-0.94134	0.0039128	46.249	yes	0.966	1.021	0.952	1.111	0.939	1.011
1946	ALEPIQEHIQR	A0A2G2YTJ3	F-box protein MAX2 OS=Capsicum annuum OX=4072 GN=T459_23865	3	445.246	-0.72003	0.0010381	62.338	yes	NA	NA	NA	NA	NA	NA
1947	ALERPDLSLQR	A0A1U8EU58	Uncharacterized protein OS=Capsicum annuum OX=4072 GN=T459_30138	3	433.246	-0.3468	0.025369	38.875	yes	NA	NA	NA	NA	NA	NA
1948	ALESASATVLDSK	A0A2G2ZTE8	Uncharacterized protein OS=Capsicum annuum OX=4072 GN=T459_07348	3	431.23	0.39644	1.154e-12	113.61	yes	NA	NA	NA	NA	NA	NA
1949	ALESASATVLDSK	A0A2G2ZTE8	Uncharacterized protein OS=Capsicum annuum OX=4072 GN=T459_07348	2	646.341	-0.89648	3.0565e-14	132.97	yes	0.923	0.877	0.938	1.071	1.175	1.015
1950	ALESMFK	A0A2G2YIQ9	Uncharacterized protein OS=Capsicum annuum OX=4072 GN=T459_24699	2	413.212	1.0244	0.018256	111.82	yes	0.923	1.023	0.897	1.074	1.054	1.029
1951	ALESVEEALVR	A0A2G2YPM0	Uncharacterized protein OS=Capsicum annuum OX=4072 GN=T459_22439	2	608.333	-1.6559	0.00014148	87.667	yes	NA	NA	NA	NA	NA	NA
1952	ALESVEEALVR	A0A2G2YPM0	Uncharacterized protein OS=Capsicum annuum OX=4072 GN=T459_22439	3	405.891	-0.33157	0.0053872	46.844	yes	NA	NA	NA	NA	NA	NA
1953	ALESVIGHLR	A0A1U8H981	RNA-binding KH domain-containing protein PEPPER OS=Capsicum annuum OX=4072 GN=T459_19246	3	365.549	0.2496	0.00092979	72.928	yes	0.807	1.565	0.315	1.692	0.814	0.808
1954	ALETHGNQTENDYKEK	A0A2G2Z9D7	Uncharacterized protein OS=Capsicum annuum OX=4072 GN=T459_16631	4	469.972	-1.9193	0.002726	39.629	yes	1.086	0.959	0.957	0.876	1.167	0.956
1955	ALEVIDLDQK	A0A2G3A3N1	Pumilio-like protein 2 OS=Capsicum annuum OX=4072 GN=T459_10952	3	381.88	-0.67055	0.0059349	50.353	yes	NA	NA	NA	NA	NA	NA
1956	ALEVIHGR	A0A1U8G201	Chlorophyll a-b binding protein, chloroplastic OS=Capsicum annuum OX=4072 GN=T459_08724	3	298.843	-0.10421	0.0080569	62.659	yes	1.563	0.847	1.005	0.897	0.86	0.829
1957	ALEVIHGR	A0A1U8G201	Chlorophyll a-b binding protein, chloroplastic OS=Capsicum annuum OX=4072 GN=T459_08724	3	298.843	-0.77905	0.0038246	77.058	yes	0.983	1.067	0.996	0.856	0.928	1.171
1958	ALEVIHGR	A0A1U8G201	Chlorophyll a-b binding protein, chloroplastic OS=Capsicum annuum OX=4072 GN=T459_08724	2	447.761	-1.1374	1.7265e-05	150.35	yes	1.103	0.976	1.031	0.926	1	0.964
1959	ALEVIHGR	A0A1U8G201	Chlorophyll a-b binding protein, chloroplastic OS=Capsicum annuum OX=4072 GN=T459_08724	3	298.843	1.2447	0.019571	46.813	yes	0.881	0.982	0.847	1.056	1.048	1.187
1960	ALEVIHGR	A0A1U8G201	Chlorophyll a-b binding protein, chloroplastic OS=Capsicum annuum OX=4072 GN=T459_08724	3	298.843		0.004709	64.207	yes	NA	NA	NA	NA	NA	NA
1961	ALEVIHGR	A0A1U8G201	Chlorophyll a-b binding protein, chloroplastic OS=Capsicum annuum OX=4072 GN=T459_08724	3	298.843	0.14409	0.0093094	58.917	yes	0.848	0.823	1.38	0.387	1.315	1.246
1962	ALEVIHGR	A0A1U8G201	Chlorophyll a-b binding protein, chloroplastic OS=Capsicum annuum OX=4072 GN=T459_08724	3	298.843	0.19682	0.0087187	60.682	yes	0.938	1.079	1.024	1.143	0.89	0.925
1963	ALEVIHGR	A0A1U8G201	Chlorophyll a-b binding protein, chloroplastic OS=Capsicum annuum OX=4072 GN=T459_08724	3	298.843	1.2307	0.00829	61.962	yes	0.561	0.449	0.84	0.623	2.535	0.992
1964	ALEVIHGR	A0A1U8G201	Chlorophyll a-b binding protein, chloroplastic OS=Capsicum annuum OX=4072 GN=T459_08724	3	298.843		0.0060732	58.917	yes	NA	NA	NA	NA	NA	NA
1965	ALEVIQFLK	A0A2G2ZF64	Villin-2 OS=Capsicum annuum OX=4072 GN=T459_13668	2	530.824	-1.1833	0.00037532	129.85	yes	0.961	0.857	0.936	1.05	1.205	0.991
1966	ALEVIQFLK	A0A2G2ZF64	Villin-2 OS=Capsicum annuum OX=4072 GN=T459_13668	3	354.218	0.47019	0.0013773	77.732	yes	1.035	0.916	0.816	0.975	1.231	1.026
1967	ALEVLNFTPLNGK	A0A1U8DZF4	Polyadenylate-binding protein OS=Capsicum annuum OX=4072 GN=T459_33534	3	472.929	-0.99323	6.6643e-05	85.522	yes	1.043	1.045	0.991	0.959	0.922	1.039
1968	ALEVVQYIK	A0A2G2XUA1	Villin-2 (Fragment) OS=Capsicum annuum OX=4072 GN=T459_35130	2	531.813	-0.40328	0.0010853	117.7	yes	NA	NA	NA	NA	NA	NA
1969	ALEWGEPK	A0A1U8H8G3	Xylose isomerase OS=Capsicum annuum OX=4072 GN=T459_18724	2	465.24	-1.1304	0.03681	59.35	yes	NA	NA	NA	NA	NA	NA
1970	ALEYENFDKFDR	A0A1U8HA96	2,3-bisphosphoglycerate-independent phosphoglycerate mutase OS=Capsicum annuum OX=4072 GN=T459_19505	3	516.244	-1.3894	0.039223	34	yes	0.997	0.938	0.945	0.999	1.145	0.977
1971	ALFADEPVVVAR	A0A1U8FN05	Derlin OS=Capsicum annuum OX=4072 GN=T459_05840	2	643.859	-1.2998	1.326e-15	142.89	yes	0.922	0.97	0.847	1.072	1.082	1.106
1972	ALFDIPVAR	A0A2G2Y2G5	Putative zinc metalloprotease EGY3, chloroplastic OS=Capsicum annuum OX=4072 GN=T459_32254	2	501.293	-0.5975	0.016551	62.107	yes	0.979	0.89	1.058	1.093	0.991	0.989
1973	ALFEQFGDIR	A0A2G2YIV9	Protein MEI2-like 5 OS=Capsicum annuum OX=4072 GN=T459_24796	2	598.309	-0.949	0.0040247	72.152	yes	0.941	0.915	0.922	1.044	1.053	1.125
1974	ALFGDVQGK	A0A1U8EGS6	Golgi SNAP receptor complex member 1 OS=Capsicum annuum OX=4072 GN=T459_03308	2	467.753	-0.88938	0.016893	61.56	yes	NA	NA	NA	NA	NA	NA
1975	ALFGEYVAAK	A0A1U8EF39	Acyl-coenzyme A oxidase OS=Capsicum annuum OX=4072 GN=T459_24846	2	534.79	-0.33075	9.4923e-06	130.98	yes	0.919	0.864	0.924	1.057	1.167	1.069
1976	ALFGEYVAAK	A0A1U8EF39	Acyl-coenzyme A oxidase OS=Capsicum annuum OX=4072 GN=T459_24846	3	356.862	1.6931	0.0036357	54.982	yes	NA	NA	NA	NA	NA	NA
1977	ALFGIEFDNR	A0A1U8ETY5	Ubiquitin carboxyl-terminal hydrolase 7 OS=Capsicum annuum OX=4072 GN=T459_30537	2	591.301	-1.1254	0.00022409	94.692	yes	1.031	1.043	1.041	0.996	0.915	0.974
1978	ALFPAASVAK	A0A2G2YRD0	Putative glutathione S-transferase OS=Capsicum annuum OX=4072 GN=T459_23085	3	325.527	0.29917	0.0068936	48.423	yes	NA	NA	NA	NA	NA	NA
1979	ALFPPFQK	A0A1U8F9Y7	NADPH-protochlorophyllide oxidoreductase OS=Capsicum annuum OX=4072 GN=T459_20142	3	316.516	1.3263	0.009288	58.981	yes	1.038	1.168	1.025	0.789	1.108	0.872
1980	ALFQGVGR	A0A2G2Z2T2	Plant UBX domain-containing protein 5 OS=Capsicum annuum OX=4072 GN=T459_19852	2	424.243	-1.1517	0.029794	64.567	yes	NA	NA	NA	NA	NA	NA
1981	ALGCGAVLVSGNELK	A0A2G3AES2	Diaminopimelate decarboxylase 2, chloroplastic OS=Capsicum annuum OX=4072 GN=T459_00606	3	496.929	-1.1398	0.00067734	53.869	yes	NA	NA	NA	NA	NA	NA
1982	ALGCGAVLVSGNELK	A0A2G3AES2	Diaminopimelate decarboxylase 2, chloroplastic OS=Capsicum annuum OX=4072 GN=T459_00606	3	496.601	-0.96724	7.4657e-08	89.231	yes	1.046	1.003	0.999	0.895	1.1	0.958
1983	ALGCGAVLVSGNELK	A0A2G3AES2	Diaminopimelate decarboxylase 2, chloroplastic OS=Capsicum annuum OX=4072 GN=T459_00606	2	744.398	-1.8648	0.00063147	59.227	yes	1.041	1.045	1.019	0.97	0.966	0.96
1984	ALGDQFPEGER	A0A1U8F3J0	Ubiquitin carboxyl-terminal hydrolase 46 OS=Capsicum annuum OX=4072 GN=T459_30349	2	609.791	-2.1972	0.047005	42.426	yes	NA	NA	NA	NA	NA	NA
1985	ALGDYLGVK	A0A1U8EU79	Eukaryotic initiation factor 4A-11 OS=Capsicum annuum OX=4072 GN=T459_31038	3	312.511	-0.058013	0.002566	71.379	no	1.02	1.001	0.972	0.987	1.039	0.98
1986	ALGDYLGVK	A0A1U8EU79	Eukaryotic initiation factor 4A-11 OS=Capsicum annuum OX=4072 GN=T459_31038	2	468.263	-2.0521	0.00098697	115.71	no	1.037	1.031	0.947	0.934	1.07	0.982
1987	ALGEELGVPLEVYGPEATMTGICER	A0A2G2XXQ3	ATP-citrate synthase alpha chain protein 3 OS=Capsicum annuum OX=4072 GN=T459_33914	3	903.103	-1.146	7.4774e-07	55.247	yes	0.978	1.027	0.974	1.143	0.973	0.904
1988	ALGFEATEEEINR	A0A2G2ZI52	Caltractin (Fragment) OS=Capsicum annuum OX=4072 GN=T459_14671	3	493.576	-0.34931	1.7323e-06	98.105	yes	NA	NA	NA	NA	NA	NA
1989	ALGFEATEEEINR	A0A2G2ZI52	Caltractin (Fragment) OS=Capsicum annuum OX=4072 GN=T459_14671	2	739.86	-1.478	1.3796e-16	147.26	yes	0.967	0.909	0.904	1.006	1.194	1.021
1990	ALGFLPEEGHGVYVAR	A0A2G3AAM6	Protease Do-like 7 OS=Capsicum annuum OX=4072 GN=T459_06422	3	572.302	-1.2114	0.022346	31.614	yes	0.989	0.926	1.088	0.95	0.953	1.094
1991	ALGGSIVGSGK	A0A1U8FLW7	Protein DJ-1-like protein D OS=Capsicum annuum OX=4072 GN=T459_06061	2	473.272	-1.4008	5.4019e-09	134.98	yes	1.089	0.975	0.997	0.956	1.008	0.975
1992	ALGGSIVGSGK	A0A1U8FLW7	Protein DJ-1-like protein D OS=Capsicum annuum OX=4072 GN=T459_06061	3	315.85	0.26776	0.028402	34.773	yes	NA	NA	NA	NA	NA	NA
1993	ALGHVVTTSPEKPTFDNIQCVR	A0A2G3AG16	Uncharacterized protein OS=Capsicum annuum OX=4072 GN=T459_01010	4	618.069	-1.2334	1.8034e-05	53.033	yes	NA	NA	NA	NA	NA	NA
[truncated: 41,394 more rows]
