# Supplementary material for: Comparative proteomic analysis of pepper (Capsicum annuum L.) seedlings under selenium stress
Source: PeerJ. 2019 Nov 27;7:e8020. doi: 10.7717/peerj.8020 (PMC6884995; doi:10.7717/peerj.8020)
Supplement: Supplemental Information 5 [file peerj-07-8020-s005.xlsx]

## Sheet: TableS3
Table S3. The detail information of all identified proteins.
Protein accession	Protein description	Gene name	MW [kDa]	Score	Coverage [%]	Peptides	PSMs	Unique peptides	Mock_1	Mock_2	Mock_3	Se_1	Se_2	Se_3	Se/Mock Ratio	Se/Mock P value	Subcellular localization	Biological Process	Cellular Component	Molecular Function	KEGG KO No.	KEGG Gene	KEGG pathway	IPR ID	Domain description	KOG category	KOG NO.	KOG description
A0A023H832	1-aminocyclopropane-1-carboxylate oxidase 4 OS=Capsicum annuum OX=4072 GN=T459_05940	T459_05940	36.399	37.487	27.8	7	24	4	1.057	1.051	1.115	1.005	0.884	0.94	0.878	0.034104	cytoplasm	GO:0044699 single-organism process; GO:0008152 metabolic process; GO:0055114 oxidation-reduction process; GO:0044710 single-organism metabolic process;		GO:0046872 metal ion binding; GO:0043169 cation binding; GO:0003824 catalytic activity; GO:0005488 binding; GO:0016491 oxidoreductase activity; GO:0043167 ion binding;	K05933	E1.14.17.4; aminocyclopropanecarboxylate oxidase [EC:1.14.17.4]	sly01110 Biosynthesis of secondary metabolites - Solanum lycopersicum (tomato); sly00270 Cysteine and methionine metabolism - Solanum lycopersicum (tomato); sly01100 Metabolic pathways - Solanum lycopersicum (tomato);	IPR027443; IPR005123; IPR026992;	Isopenicillin N synthase-like; Oxoglutarate/iron-dependent dioxygenase; Non-haem dioxygenase N-terminal domain;	QR	KOG0143	Iron/ascorbate family oxidoreductases
A0A023JGD5	MAF1 OS=Capsicum annuum OX=4072 GN=T459_13043	T459_13043	15.325	60.887	19.7	2	3	2	0.913	0.944	0.944	1.045	0.977	1.124	1.123	0.05238	nucleus							IPR025265;	WPP domain;	DO	KOG0305	Anaphase promoting complex, Cdc20, Cdh1, and Ama1 subunits
A0A023JGD7	Ribulose bisphosphate carboxylase small chain OS=Capsicum annuum OX=4072 GN=T459_04234	T459_04234	20.485	316.45	63.9	13	194	13	1.02	1.004	1.016	0.974	0.994	0.991	0.973	0.026943	chloroplast	GO:0008152 metabolic process; GO:0043094 cellular metabolic compound salvage; GO:0055114 oxidation-reduction process; GO:0044710 single-organism metabolic process; GO:0044699 single-organism process; GO:0015977 carbon fixation; GO:0009853 photorespiration; GO:0009987 cellular process; GO:0044237 cellular metabolic process; GO:0015979 photosynthesis; GO:0071704 organic substance metabolic process;	GO:0043226 organelle; GO:0043231 intracellular membrane-bounded organelle; GO:0043229 intracellular organelle; GO:0044464 cell part; GO:0005622 intracellular; GO:0005737 cytoplasm; GO:0044424 intracellular part; GO:0043227 membrane-bounded organelle; GO:0005623 cell; GO:0009536 plastid; GO:0044444 cytoplasmic part; GO:0009507 chloroplast;	GO:0003824 catalytic activity; GO:0016830 carbon-carbon lyase activity; GO:0016984 ribulose-bisphosphate carboxylase activity; GO:0016831 carboxy-lyase activity; GO:0016829 lyase activity; GO:0004497 monooxygenase activity; GO:0016491 oxidoreductase activity;	K01602	rbcS; ribulose-bisphosphate carboxylase small chain [EC:4.1.1.39]	sly00630 Glyoxylate and dicarboxylate metabolism - Solanum lycopersicum (tomato); sly01200 Carbon metabolism - Solanum lycopersicum (tomato); sly00710 Carbon fixation in photosynthetic organisms - Solanum lycopersicum (tomato); sly01100 Metabolic pathways - Solanum lycopersicum (tomato);	IPR024680; IPR000894;	Ribulose-1,5-bisphosphate carboxylase small subunit, N-terminal; Ribulose bisphosphate carboxylase small chain, domain;
A0A023JGE8	"Photosystem II 10 kDa polypeptide, chloroplastic OS=Capsicum annuum OX=4072 GN=T459_21070"	T459_21070	14.255	6.1703	26.5	4	21	4	1.014	0.999	1.02	1.014	1.013	0.973	0.989	0.49926	chloroplast	GO:0008152 metabolic process; GO:0044237 cellular metabolic process; GO:0009987 cellular process; GO:0015979 photosynthesis;	GO:0016020 membrane; GO:0009523 photosystem II; GO:0098796 membrane protein complex; GO:0009654 photosystem II oxygen evolving complex; GO:0042651 thylakoid membrane; GO:0031224 intrinsic component of membrane; GO:0032991 macromolecular complex; GO:0044424 intracellular part; GO:0005623 cell; GO:0016021 integral component of membrane; GO:0034357 photosynthetic membrane; GO:0009521 photosystem; GO…		K03541	psbR; photosystem II 10kDa protein	sly00195 Photosynthesis - Solanum lycopersicum (tomato); sly01100 Metabolic pathways - Solanum lycopersicum (tomato);
A0A023JGF9	DIN1 OS=Capsicum annuum OX=4072 GN=T459_06129	T459_06129	19.376	38.847	43	6	12	6	1.049	1.09	1.051	0.938	0.93	0.982	0.893	0.0057966	chloroplast							IPR001763;	Rhodanese-like domain;	P	KOG1530	Rhodanese-related sulfurtransferase
A0A059P1E3	Patatin OS=Capsicum annuum OX=4072 GN=PLP1	PLP1	45.298	43.091	25.7	8	12	8	0.626	0.611	0.665	1.338	1.316	1.376	2.119	1.60185e-05	chloroplast	GO:0016042 lipid catabolic process; GO:1901575 organic substance catabolic process; GO:0008152 metabolic process; GO:0044710 single-organism metabolic process; GO:0044712 single-organism catabolic process; GO:0044699 single-organism process; GO:0044238 primary metabolic process; GO:0009056 catabolic process; GO:0071704 organic substance metabolic process; GO:0006629 lipid metabolic process;		GO:0016787 hydrolase activity; GO:0003824 catalytic activity;				IPR016035; IPR002641;	Acyl transferase/acyl hydrolase/lysophospholipase; Patatin/Phospholipase A2-related;	I	KOG0513	Ca2+-independent phospholipase A2
A0A075B8I5	ABA-responsive protein 1 OS=Capsicum annuum OX=4072 GN=ABR1	ABR1	31.696	185.86	55.3	14	36	12	0.482	0.504	0.493	1.413	1.512	1.487	2.983	7.0795e-07	nucleus							IPR004182;	GRAM domain;
A0A075VSL0	"50S ribosomal protein L2, chloroplastic OS=Capsicum annuum OX=4072 GN=orf172"	orf172	19.52	116.14	24.4	4	8	4	1.066	1.011	1.076	0.892	0.941	0.99	0.895	0.036139	chloroplast	GO:0006518 peptide metabolic process; GO:0043043 peptide biosynthetic process; GO:0044267 cellular protein metabolic process; GO:0006807 nitrogen compound metabolic process; GO:0009058 biosynthetic process; GO:0043603 cellular amide metabolic process; GO:0044238 primary metabolic process; GO:1901566 organonitrogen compound biosynthetic process; GO:1901576 organic substance biosynthetic process; G…	GO:0005840 ribosome; GO:0043229 intracellular organelle; GO:0043232 intracellular non-membrane-bounded organelle; GO:0005737 cytoplasm; GO:0032991 macromolecular complex; GO:0044424 intracellular part; GO:0005623 cell; GO:0005739 mitochondrion; GO:0043228 non-membrane-bounded organelle; GO:0043226 organelle; GO:0043231 intracellular membrane-bounded organelle; GO:0005622 intracellular; GO:0044464…	GO:0003735 structural constituent of ribosome; GO:0005198 structural molecule activity;	K02886	RP-L2; large subunit ribosomal protein L2	sly03010 Ribosome - Solanum lycopersicum (tomato);	IPR012340; IPR022666;	Nucleic acid-binding, OB-fold; Ribosomal Proteins L2, RNA binding domain;	J	KOG0438	Mitochondrial/chloroplast ribosomal protein L2
A0A075W1C1	ATP synthase protein MI25 OS=Capsicum annuum OX=4072 GN=orf25	orf25	22.009	5.4786	14.4	3	6	3	1.016	0.987	0.984	1.05	0.974	1.024	1.02	0.46064	chloroplast	GO:0009116 nucleoside metabolic process; GO:0042278 purine nucleoside metabolic process; GO:0009167 purine ribonucleoside monophosphate metabolic process; GO:0009117 nucleotide metabolic process; GO:0044699 single-organism process; GO:0046129 purine ribonucleoside biosynthetic process; GO:0009163 nucleoside biosynthetic process; GO:0009058 biosynthetic process; GO:0009156 ribonucleoside monophosp…	GO:0016020 membrane; GO:0098800 inner mitochondrial membrane protein complex; GO:0031090 organelle membrane; GO:0098796 membrane protein complex; GO:0005737 cytoplasm; GO:0032991 macromolecular complex; GO:0098798 mitochondrial protein complex; GO:0044424 intracellular part; GO:0005623 cell; GO:0044455 mitochondrial membrane part; GO:0044422 organelle part; GO:0005740 mitochondrial envelope; GO:0…	GO:0015075 ion transmembrane transporter activity; GO:0022892 substrate-specific transporter activity; GO:0015077 monovalent inorganic cation transmembrane transporter activity; GO:0022890 inorganic cation transmembrane transporter activity; GO:0015078 hydrogen ion transmembrane transporter activity; GO:0008324 cation transmembrane transporter activity; GO:0022891 substrate-specific transmembrane…
A0A075W230	NADH dehydrogenase [ubiquinone] iron-sulfur protein 3 OS=Capsicum annuum OX=4072 GN=nad9	nad9	22.638	23.056	22.1	4	9	4	1.035	1.014	1.03	0.966	0.955	1.026	0.957	0.127581	nucleus	GO:0044699 single-organism process; GO:0008152 metabolic process; GO:0055114 oxidation-reduction process; GO:0044710 single-organism metabolic process;	GO:0043226 organelle; GO:0043231 intracellular membrane-bounded organelle; GO:0043229 intracellular organelle; GO:0044464 cell part; GO:0005622 intracellular; GO:0005737 cytoplasm; GO:0044424 intracellular part; GO:0043227 membrane-bounded organelle; GO:0005623 cell; GO:0005739 mitochondrion; GO:0044444 cytoplasmic part;	GO:0016651 oxidoreductase activity, acting on NAD(P)H; GO:0003954 NADH dehydrogenase activity; GO:0003824 catalytic activity; GO:0050136 NADH dehydrogenase (quinone) activity; GO:0008137 NADH dehydrogenase (ubiquinone) activity; GO:0016655 oxidoreductase activity, acting on NAD(P)H, quinone or similar compound as acceptor; GO:0016491 oxidoreductase activity;	K03936			IPR001268;	NADH:ubiquinone oxidoreductase, 30kDa subunit;	C	KOG1713	NADH-ubiquinone oxidoreductase, NDUFS3/30 kDa subunit
A0A088D9X5	T-complex protein 1 subunit zeta-like chaperone OS=Capsicum annuum OX=4072 GN=TCP	TCP	58.954	33.963	31.6	16	25	15	1.025	0.99	1.051	0.976	0.959	1.006	0.959	0.135662	cytoplasm	GO:0006457 protein folding; GO:0009987 cellular process;	GO:0044424 intracellular part; GO:0005623 cell; GO:0044464 cell part; GO:0005622 intracellular; GO:0005737 cytoplasm;	GO:0005524 ATP binding; GO:1901265 nucleoside phosphate binding; GO:0001882 nucleoside binding; GO:0043167 ion binding; GO:0005515 protein binding; GO:0000166 nucleotide binding; GO:0097159 organic cyclic compound binding; GO:1901363 heterocyclic compound binding; GO:0032549 ribonucleoside binding; GO:0097367 carbohydrate derivative binding; GO:0032553 ribonucleotide binding; GO:0005488 binding; …	K09498			IPR027410; IPR027409; IPR027413;	TCP-1-like chaperonin intermediate domain; GroEL-like apical domain; GroEL-like equatorial domain;	O	KOG0359	Chaperonin complex component, TCP-1 zeta subunit (CCT6)
A0A088DA02	Spermidine synthase OS=Capsicum annuum OX=4072 GN=SPS	SPS	37.595	52.359	24.6	7	9	7	1.021	0.985	1.043	0.989	0.974	1.033	0.983	0.50922	cytoplasm	GO:0044106 cellular amine metabolic process; GO:0006807 nitrogen compound metabolic process; GO:0009058 biosynthetic process; GO:1901566 organonitrogen compound biosynthetic process; GO:1901576 organic substance biosynthetic process; GO:0044237 cellular metabolic process; GO:0044249 cellular biosynthetic process; GO:0006576 cellular biogenic amine metabolic process; GO:0071704 organic substance m…		GO:0016740 transferase activity; GO:0003824 catalytic activity;	K00797	speE; spermidine synthase [EC:2.5.1.16]	sly00410 beta-Alanine metabolism - Solanum lycopersicum (tomato); sly00330 Arginine and proline metabolism - Solanum lycopersicum (tomato); sly00270 Cysteine and methionine metabolism - Solanum lycopersicum (tomato); sly01100 Metabolic pathways - Solanum lycopersicum (tomato); sly00480 Glutathione metabolism - Solanum lycopersicum (tomato);	IPR029063; IPR030374;	S-adenosyl-L-methionine-dependent methyltransferase; Polyamine biosynthesis domain;	E	KOG1562	Spermidine synthase
A0A089FZ95	Dehydroascorbate reductase OS=Capsicum annuum OX=4072 GN=DHAR	DHAR	23.574	104.97	67	10	25	10	1.031	1.04	1.006	0.979	0.98	0.977	0.954	0.04268	cytoplasm	GO:0008152 metabolic process; GO:1990748 cellular detoxification; GO:0042221 response to chemical; GO:0055114 oxidation-reduction process; GO:0044710 single-organism metabolic process; GO:0009636 response to toxic substance; GO:0044699 single-organism process; GO:0098869 cellular oxidant detoxification; GO:0050896 response to stimulus; GO:0098754 detoxification; GO:0009987 cellular process;		GO:0015036 disulfide oxidoreductase activity; GO:0003824 catalytic activity; GO:0005488 binding; GO:0016667 oxidoreductase activity, acting on a sulfur group of donors; GO:0016209 antioxidant activity; GO:0015038 glutathione disulfide oxidoreductase activity; GO:0005515 protein binding; GO:0016672 oxidoreductase activity, acting on a sulfur group of donors, quinone or similar compound as acceptor…	K21888	DHAR; glutathione dehydrogenase/transferase [EC:1.8.5.1 2.5.1.18]	sly00053 Ascorbate and aldarate metabolism - Solanum lycopersicum (tomato); sly01100 Metabolic pathways - Solanum lycopersicum (tomato); sly00480 Glutathione metabolism - Solanum lycopersicum (tomato);	IPR010987; IPR012336; IPR004045;	Glutathione S-transferase, C-terminal-like; Thioredoxin-like fold; Glutathione S-transferase, N-terminal;	P	KOG1422	Intracellular Cl- channel CLIC, contains GST domain
A0A0G2RJN8	Oligopeptidase B OS=Capsicum annuum OX=4072 GN=OPB	OPB	80.738	36.203	19.2	12	16	12	1.006	1.015	1.018	0.989	0.967	1.003	0.974	0.075544	chloroplast	GO:0006508 proteolysis; GO:0008152 metabolic process; GO:0043170 macromolecule metabolic process; GO:0019538 protein metabolic process; GO:0044238 primary metabolic process; GO:0071704 organic substance metabolic process;		GO:0004252 serine-type endopeptidase activity; GO:0004175 endopeptidase activity; GO:0008238 exopeptidase activity; GO:0008233 peptidase activity; GO:0003824 catalytic activity; GO:0017171 serine hydrolase activity; GO:0008236 serine-type peptidase activity; GO:0070011 peptidase activity, acting on L-amino acid peptides; GO:0016787 hydrolase activity; GO:0070008 serine-type exopeptidase activity;	K01354			IPR001375; IPR029058; IPR023302; IPR011042;	Peptidase S9, prolyl oligopeptidase, catalytic domain; Alpha/Beta hydrolase fold; Peptidase S9A, N-terminal domain; Six-bladed beta-propeller, TolB-like;	O	KOG2237	Predicted serine protease
A0A172QZV1	NAC domain-containing protein 45 OS=Capsicum annuum OX=4072 GN=T459_09731	T459_09731	69.99	15.86	5.1	2	2	2	0.845	0.809	0.818	1.191	1.13	1.196	1.423	9.814e-05	nucleus	GO:0050794 regulation of cellular process; GO:0006725 cellular aromatic compound metabolic process; GO:0097659 nucleic acid-templated transcription; GO:0060255 regulation of macromolecule metabolic process; GO:0019219 regulation of nucleobase-containing compound metabolic process; GO:0009058 biosynthetic process; GO:0044237 cellular metabolic process; GO:0071704 organic substance metabolic proces…	GO:0043226 organelle; GO:0043231 intracellular membrane-bounded organelle; GO:0043229 intracellular organelle; GO:0016020 membrane; GO:0005634 nucleus; GO:0044425 membrane part; GO:0044464 cell part; GO:0005622 intracellular; GO:0031224 intrinsic component of membrane; GO:0044424 intracellular part; GO:0043227 membrane-bounded organelle; GO:0005623 cell; GO:0016021 integral component of membrane;	GO:0097159 organic cyclic compound binding; GO:1901363 heterocyclic compound binding; GO:0003677 DNA binding; GO:0005488 binding; GO:0003676 nucleic acid binding;				IPR003441;	NAC domain;
A0A1U8DQR5	Putative prefoldin subunit 5 OS=Capsicum annuum OX=4072 GN=T459_21141	T459_21141	16.309	2.2308	8.2	1	1	1									cytoplasm	GO:0006457 protein folding; GO:0009987 cellular process;	GO:0016272 prefoldin complex; GO:0032991 macromolecular complex; GO:0043234 protein complex;	GO:0005515 protein binding; GO:0051082 unfolded protein binding; GO:0005488 binding;	K04797					O	KOG3048	Molecular chaperone Prefoldin, subunit 5
A0A1U8DQZ0	"Aspartokinase 3, chloroplastic OS=Capsicum annuum OX=4072 GN=T459_21214"	T459_21214	62.109	3.3652	2.5	1	1	1									chloroplast	GO:0008652 cellular amino acid biosynthetic process; GO:0016053 organic acid biosynthetic process; GO:0044711 single-organism biosynthetic process; GO:0044281 small molecule metabolic process; GO:0044763 single-organism cellular process; GO:0006807 nitrogen compound metabolic process; GO:0044699 single-organism process; GO:0009058 biosynthetic process; GO:0044238 primary metabolic process; GO:190…		GO:0016774 phosphotransferase activity, carboxyl group as acceptor; GO:0016597 amino acid binding; GO:0031406 carboxylic acid binding; GO:0016301 kinase activity; GO:0003824 catalytic activity; GO:0005488 binding; GO:0043167 ion binding; GO:0043177 organic acid binding; GO:0019202 amino acid kinase activity; GO:0043168 anion binding; GO:0004072 aspartate kinase activity; GO:0016740 transferase ac…	K00928	lysC; aspartate kinase [EC:2.7.2.4]	sly00260 Glycine, serine and threonine metabolism - Solanum lycopersicum (tomato); sly01110 Biosynthesis of secondary metabolites - Solanum lycopersicum (tomato); sly01210 2-Oxocarboxylic acid metabolism - Solanum lycopersicum (tomato); sly00300 Lysine biosynthesis - Solanum lycopersicum (tomato); sly00270 Cysteine and methionine metabolism - Solanum lycopersicum (tomato); sly00261 Monobactam bio…	IPR001048; IPR002912; IPR001341;	Aspartate/glutamate/uridylate kinase; ACT domain; Aspartate kinase domain;	E	KOG0456	Aspartate kinase
A0A1U8DQZ8	Microtubule-associated protein 70-2 OS=Capsicum annuum OX=4072 GN=T459_21227	T459_21227	69.417	21.591	4.5	2	2	2									chloroplast	GO:0016043 cellular component organization; GO:0007010 cytoskeleton organization; GO:0009987 cellular process; GO:0006996 organelle organization; GO:0071840 cellular component organization or biogenesis;		GO:0015631 tubulin binding; GO:0005515 protein binding; GO:0008092 cytoskeletal protein binding; GO:0008017 microtubule binding; GO:0005488 binding;
A0A1U8DRC2	Guanosine nucleotide diphosphate dissociation inhibitor OS=Capsicum annuum OX=4072 GN=T459_21350	T459_21350	49.561	61.682	30	12	22	10	1.007	1.011	1.006	0.976	1	0.989	0.98	0.051402	cytoplasm	GO:0050794 regulation of cellular process; GO:0044700 single organism signaling; GO:0051716 cellular response to stimulus; GO:0035556 intracellular signal transduction; GO:0055114 oxidation-reduction process; GO:0044699 single-organism process; GO:0071702 organic substance transport; GO:0007264 small GTPase mediated signal transduction; GO:0023052 signaling; GO:0050896 response to stimulus; GO:00…		GO:0030234 enzyme regulator activity; GO:0003824 catalytic activity; GO:0005093 Rab GDP-dissociation inhibitor activity; GO:0005092 GDP-dissociation inhibitor activity; GO:0060589 nucleoside-triphosphatase regulator activity; GO:0030695 GTPase regulator activity; GO:0098772 molecular function regulator; GO:0016491 oxidoreductase activity;	K17255			IPR023753;	FAD/NAD(P)-binding domain;	O	KOG1439	RAB proteins geranylgeranyltransferase component A (RAB escort protein)
A0A1U8DRF1	Methylthioribose-1-phosphate isomerase OS=Capsicum annuum OX=4072 GN=T459_21340	T459_21340	39.27	10.795	13.9	5	7	5	1.053	0.99	1.082	0.947	0.992	0.986	0.936	0.094256	cytoplasm	GO:0009058 biosynthetic process; GO:0008152 metabolic process; GO:0044237 cellular metabolic process; GO:0009987 cellular process; GO:0044249 cellular biosynthetic process;			K08963	mtnA; methylthioribose-1-phosphate isomerase [EC:5.3.1.23]	sly00270 Cysteine and methionine metabolism - Solanum lycopersicum (tomato); sly01100 Metabolic pathways - Solanum lycopersicum (tomato);	IPR027363;	Methylthioribose-1-phosphate isomerase-like, N-terminal domain;	J	KOG1468	Predicted translation initiation factor related to eIF-2B alpha/beta/delta subunits (CIG2/IDI2)
A0A1U8DRG8	"UDP-sulfoquinovose synthase, chloroplastic OS=Capsicum annuum OX=4072 GN=T459_21371"	T459_21371	53.722	98.023	36.2	16	30	16	1	1.013	1.013	0.987	0.999	0.985	0.982	0.04082	chloroplast			GO:0048037 cofactor binding; GO:0003824 catalytic activity; GO:0005488 binding; GO:0050662 coenzyme binding;	K06118	SQD1; UDP-sulfoquinovose synthase [EC:3.13.1.1]	sly00561 Glycerolipid metabolism - Solanum lycopersicum (tomato); sly00520 Amino sugar and nucleotide sugar metabolism - Solanum lycopersicum (tomato);	IPR001509; IPR016040;	NAD-dependent epimerase/dehydratase; NAD(P)-binding domain;	M	KOG1371	UDP-glucose 4-epimerase/UDP-sulfoquinovose synthase
A0A1U8DRK9	"Polyribonucleotide nucleotidyltransferase 1, chloroplastic OS=Capsicum annuum OX=4072 GN=T459_21393"	T459_21393	96.022	65.868	17.5	15	20	15	0.992	1.065	1.014	0.984	0.973	0.996	0.962	0.153381	chloroplast	GO:0006725 cellular aromatic compound metabolic process; GO:0060255 regulation of macromolecule metabolic process; GO:0048519 negative regulation of biological process; GO:0044237 cellular metabolic process; GO:0071704 organic substance metabolic process; GO:0044270 cellular nitrogen compound catabolic process; GO:0008152 metabolic process; GO:0046483 heterocycle metabolic process; GO:0006139 nuc…		GO:0003723 RNA binding; GO:0000175 3'-5'-exoribonuclease activity; GO:0016896 exoribonuclease activity, producing 5'-phosphomonoesters; GO:0008408 3'-5' exonuclease activity; GO:0016787 hydrolase activity; GO:0016796 exonuclease activity, active with either ribo- or deoxyribonucleic acids and producing 5'-phosphomonoesters; GO:1901363 heterocyclic compound binding; GO:0097159 organic cyclic compo…	K00962	pnp; polyribonucleotide nucleotidyltransferase [EC:2.7.7.8]	sly03018 RNA degradation - Solanum lycopersicum (tomato); sly00230 Purine metabolism - Solanum lycopersicum (tomato); sly00240 Pyrimidine metabolism - Solanum lycopersicum (tomato);	IPR012340; IPR015847; IPR003029; IPR015848; IPR027408; IPR004087; IPR004088; IPR001247; IPR022967; IPR020568;	Nucleic acid-binding, OB-fold; Exoribonuclease, phosphorolytic domain 2; S1 domain; Polyribonucleotide nucleotidyltransferase, RNA-binding domain; PNPase/RNase PH domain; K Homology domain; K Homology domain, type 1; Exoribonuclease, phosphorolytic domain 1; RNA-binding domain, S1; Ribosomal protein S5 domain 2-type fold;	R	KOG1067	Predicted RNA-binding polyribonucleotide nucleotidyltransferase
A0A1U8DRR7	Serine hydroxymethyltransferase OS=Capsicum annuum OX=4072 GN=T459_21456	T459_21456	56.799	30.091	21	11	20	2	1.028	1.015	1.036	1.005	0.951	0.986	0.956	0.056976	chloroplast	GO:0044281 small molecule metabolic process; GO:0044763 single-organism cellular process; GO:0006807 nitrogen compound metabolic process; GO:0044699 single-organism process; GO:0044238 primary metabolic process; GO:0006544 glycine metabolic process; GO:1901605 alpha-amino acid metabolic process; GO:0044237 cellular metabolic process; GO:0071704 organic substance metabolic process; GO:0008152 meta…		GO:0097159 organic cyclic compound binding; GO:1901363 heterocyclic compound binding; GO:0003824 catalytic activity; GO:0005488 binding; GO:0043167 ion binding; GO:0004372 glycine hydroxymethyltransferase activity; GO:0016741 transferase activity, transferring one-carbon groups; GO:0043168 anion binding; GO:0016742 hydroxymethyl-, formyl- and related transferase activity; GO:0048037 cofactor bind…	K00600	glyA; glycine hydroxymethyltransferase [EC:2.1.2.1]	sly00260 Glycine, serine and threonine metabolism - Solanum lycopersicum (tomato); sly01110 Biosynthesis of secondary metabolites - Solanum lycopersicum (tomato); sly00630 Glyoxylate and dicarboxylate metabolism - Solanum lycopersicum (tomato); sly00460 Cyanoamino acid metabolism - Solanum lycopersicum (tomato); sly01200 Carbon metabolism - Solanum lycopersicum (tomato); sly01230 Biosynthesis of …	IPR015424; IPR015421; IPR015422;	Pyridoxal phosphate-dependent transferase; Pyridoxal phosphate-dependent transferase, major region, subdomain 1; Pyridoxal phosphate-dependent transferase, major region, subdomain 2;	E	KOG2467	Glycine/serine hydroxymethyltransferase
A0A1U8DRU2	Aspartate aminotransferase OS=Capsicum annuum OX=4072 GN=T459_21468	T459_21468	50.747	128.49	47.6	18	34	18	0.995	0.984	0.991	1.016	1.028	1.006	1.027	0.0196394	chloroplast	GO:0044281 small molecule metabolic process; GO:0044763 single-organism cellular process; GO:0006807 nitrogen compound metabolic process; GO:0044699 single-organism process; GO:0009058 biosynthetic process; GO:0044238 primary metabolic process; GO:0044237 cellular metabolic process; GO:0071704 organic substance metabolic process; GO:0008152 metabolic process; GO:0006520 cellular amino acid metabo…		GO:0097159 organic cyclic compound binding; GO:1901363 heterocyclic compound binding; GO:0016769 transferase activity, transferring nitrogenous groups; GO:0003824 catalytic activity; GO:0005488 binding; GO:0043167 ion binding; GO:0043168 anion binding; GO:0008483 transaminase activity; GO:0016740 transferase activity; GO:0048037 cofactor binding; GO:0030170 pyridoxal phosphate binding;	K00811	ASP5; aspartate aminotransferase, chloroplastic [EC:2.6.1.1]	sly01110 Biosynthesis of secondary metabolites - Solanum lycopersicum (tomato); sly00350 Tyrosine metabolism - Solanum lycopersicum (tomato); sly00330 Arginine and proline metabolism - Solanum lycopersicum (tomato); sly01210 2-Oxocarboxylic acid metabolism - Solanum lycopersicum (tomato); sly00270 Cysteine and methionine metabolism - Solanum lycopersicum (tomato); sly00950 Isoquinoline alkaloid b…	IPR015424; IPR004839; IPR015421;	Pyridoxal phosphate-dependent transferase; Aminotransferase, class I/classII; Pyridoxal phosphate-dependent transferase, major region, subdomain 1;	E	KOG1411	Aspartate aminotransferase/Glutamic oxaloacetic transaminase AAT1/GOT2
A0A1U8DRZ6	Aminopeptidase OS=Capsicum annuum OX=4072 GN=T459_21592	T459_21592	99.138	58.249	26.4	20	26	20	1.053	1.029	0.995	1.008	0.978	0.952	0.955	0.118315	cytoplasm			GO:0008233 peptidase activity; GO:0046914 transition metal ion binding; GO:0003824 catalytic activity; GO:0005488 binding; GO:0043167 ion binding; GO:0070011 peptidase activity, acting on L-amino acid peptides; GO:0046872 metal ion binding; GO:0043169 cation binding; GO:0016787 hydrolase activity; GO:0008237 metallopeptidase activity; GO:0008270 zinc ion binding;	K08776			IPR014782; IPR024571;	Peptidase M1, membrane alanine aminopeptidase, N-terminal; ERAP1-like C-terminal domain;	EO	KOG1046	Puromycin-sensitive aminopeptidase and related aminopeptidases
A0A1U8DS26	Elongation factor 2 OS=Capsicum annuum OX=4072 GN=T459_21494	T459_21494	94.04	5.7728	42.5	35	103	2	1.165	1.005	0.919	0.933	0.936	1.049	0.945	0.5353	cytoplasm			GO:1901265 nucleoside phosphate binding; GO:0001882 nucleoside binding; GO:0043167 ion binding; GO:0016817 hydrolase activity, acting on acid anhydrides; GO:0016787 hydrolase activity; GO:0000166 nucleotide binding; GO:0017111 nucleoside-triphosphatase activity; GO:0097159 organic cyclic compound binding; GO:1901363 heterocyclic compound binding; GO:0032549 ribonucleoside binding; GO:0097367 carb…	K03234			IPR027417; IPR000795; IPR005517; IPR005225; IPR004161; IPR000640; IPR020568; IPR014721; IPR009022; IPR009000;	P-loop containing nucleoside triphosphate hydrolase; Transcription factor, GTP-binding domain; Translation elongation factor EFG/EF2, domain IV; Small GTP-binding protein domain; Translation elongation factor EFTu-like, domain 2; Translation elongation factor EFG, V domain; Ribosomal protein S5 domain 2-type fold; Ribosomal protein S5 domain 2-type fold, subgroup; Elongation factor G, III-V domai…	J	KOG0469	Elongation factor 2
A0A1U8DS55	Lactoylglutathione lyase OS=Capsicum annuum OX=4072 GN=T459_21573	T459_21573	40.309	59.875	31.4	10	25	9	1.011	1.035	1.019	0.995	0.96	0.993	0.962	0.044658	chloroplast,mitochondria			GO:0004462 lactoylglutathione lyase activity; GO:0046872 metal ion binding; GO:0043169 cation binding; GO:0016829 lyase activity; GO:0016846 carbon-sulfur lyase activity; GO:0003824 catalytic activity; GO:0005488 binding; GO:0043167 ion binding;	K01759	GLO1; lactoylglutathione lyase [EC:4.4.1.5]	sly00620 Pyruvate metabolism - Solanum lycopersicum (tomato);	IPR029068; IPR004360;	Glyoxalase/Bleomycin resistance protein/Dihydroxybiphenyl dioxygenase; Glyoxalase/fosfomycin resistance/dioxygenase domain;	G	KOG2943	Predicted glyoxalase
A0A1U8DS79	Uncharacterized protein OS=Capsicum annuum OX=4072 GN=T459_21628	T459_21628	52.415	17.868	15.4	7	13	7	0.97	0.988	0.961	1.013	0.998	1.052	1.049	0.053255	extracellular	GO:0006508 proteolysis; GO:0008152 metabolic process; GO:0043170 macromolecule metabolic process; GO:0019538 protein metabolic process; GO:0044238 primary metabolic process; GO:0071704 organic substance metabolic process;		GO:0004175 endopeptidase activity; GO:0008233 peptidase activity; GO:0003824 catalytic activity; GO:0004190 aspartic-type endopeptidase activity; GO:0070011 peptidase activity, acting on L-amino acid peptides; GO:0016787 hydrolase activity; GO:0070001 aspartic-type peptidase activity;				IPR032799; IPR033121; IPR021109; IPR033873; IPR032861;	Xylanase inhibitor, C-terminal; Peptidase family A1 domain; Aspartic peptidase domain; CND41-like; Xylanase inhibitor, N-terminal;	O	KOG1339	Aspartyl protease
A0A1U8DSA1	Uncharacterized protein OS=Capsicum annuum OX=4072 GN=T459_21618	T459_21618	40.673	73.752	39.5	11	28	11	1.004	1.027	1.007	0.995	0.986	0.986	0.977	0.037796	cytoplasm							IPR006946; IPR008979;	Domain of unknown function DUF642; Galactose-binding domain-like;
A0A1U8DSI7	Uncharacterized protein OS=Capsicum annuum OX=4072 GN=T459_21696	T459_21696	72.549	4.2725	5.5	3	3	3	1.28	0.357	1.245	1.267	0.969	0.873	1.079	0.65314	nucleus	GO:0045184 establishment of protein localization; GO:0006810 transport; GO:0046907 intracellular transport; GO:0070727 cellular macromolecule localization; GO:0051649 establishment of localization in cell; GO:0006886 intracellular protein transport; GO:0071702 organic substance transport; GO:0008104 protein localization; GO:0033036 macromolecule localization; GO:0034613 cellular protein localizat…	GO:0005623 cell; GO:0005622 intracellular; GO:0044464 cell part;					IPR002014; IPR004152; IPR008942;	VHS domain; GAT domain; ENTH/VHS;	U	KOG1087	Cytosolic sorting protein GGA2/TOM1
A0A1U8DSJ1	Aspartate aminotransferase OS=Capsicum annuum OX=4072 GN=T459_21699	T459_21699	49.732	10.385	13.9	5	6	5	0.975	0.97	1.052	1	1.04	0.987	1.01	0.75076	cytoplasm	GO:0044281 small molecule metabolic process; GO:0044763 single-organism cellular process; GO:0006807 nitrogen compound metabolic process; GO:0044699 single-organism process; GO:0009058 biosynthetic process; GO:0044238 primary metabolic process; GO:0044237 cellular metabolic process; GO:0071704 organic substance metabolic process; GO:0008152 metabolic process; GO:0006520 cellular amino acid metabo…		GO:0097159 organic cyclic compound binding; GO:1901363 heterocyclic compound binding; GO:0016769 transferase activity, transferring nitrogenous groups; GO:0003824 catalytic activity; GO:0005488 binding; GO:0043167 ion binding; GO:0043168 anion binding; GO:0008483 transaminase activity; GO:0016740 transferase activity; GO:0048037 cofactor binding; GO:0030170 pyridoxal phosphate binding;	K14454	GOT1; aspartate aminotransferase, cytoplasmic [EC:2.6.1.1]	sly01110 Biosynthesis of secondary metabolites - Solanum lycopersicum (tomato); sly00350 Tyrosine metabolism - Solanum lycopersicum (tomato); sly00330 Arginine and proline metabolism - Solanum lycopersicum (tomato); sly01210 2-Oxocarboxylic acid metabolism - Solanum lycopersicum (tomato); sly00270 Cysteine and methionine metabolism - Solanum lycopersicum (tomato); sly01200 Carbon metabolism - Sol…	IPR015424; IPR004839; IPR015421;	Pyridoxal phosphate-dependent transferase; Aminotransferase, class I/classII; Pyridoxal phosphate-dependent transferase, major region, subdomain 1;	E	KOG1411	Aspartate aminotransferase/Glutamic oxaloacetic transaminase AAT1/GOT2
A0A1U8DSM1	Uncharacterized protein OS=Capsicum annuum OX=4072 GN=T459_21743	T459_21743	35.4	13.987	13.6	3	3	3	0.965	1.071	1.001	1.004	1.046	0.918	0.977	0.65736	chloroplast							IPR029903; IPR016040;	RmlD-like substrate binding domain; NAD(P)-binding domain;	IE	KOG1430	C-3 sterol dehydrogenase/3-beta-hydroxysteroid dehydrogenase and related dehydrogenases
A0A1U8DSP8	Remorin OS=Capsicum annuum OX=4072 GN=T459_21772	T459_21772	18.562	13.152	23.7	6	7	5	1.052	1.009	0.975	0.983	0.949	1.034	0.977	0.51882	cytoplasm							IPR005516; IPR005518;	Remorin, C-terminal; Remorin, N-terminal;
A0A1U8DSU5	Cysteine synthase OS=Capsicum annuum OX=4072 GN=T459_21819	T459_21819	40.066	57.169	28.2	9	20	8	1.037	0.955	0.977	1.003	1.017	0.983	1.011	0.6764	chloroplast	GO:0000097 sulfur amino acid biosynthetic process; GO:0016053 organic acid biosynthetic process; GO:0044699 single-organism process; GO:0009058 biosynthetic process; GO:1901566 organonitrogen compound biosynthetic process; GO:0044237 cellular metabolic process; GO:0044272 sulfur compound biosynthetic process; GO:0000096 sulfur amino acid metabolic process; GO:0071704 organic substance metabolic p…		GO:0016829 lyase activity; GO:0004124 cysteine synthase activity; GO:0003824 catalytic activity; GO:0016835 carbon-oxygen lyase activity;	K13034	ATCYSC1; L-3-cyanoalanine synthase/ cysteine synthase [EC:2.5.1.47 4.4.1.9]	sly00920 Sulfur metabolism - Solanum lycopersicum (tomato); sly01110 Biosynthesis of secondary metabolites - Solanum lycopersicum (tomato); sly00460 Cyanoamino acid metabolism - Solanum lycopersicum (tomato); sly00270 Cysteine and methionine metabolism - Solanum lycopersicum (tomato); sly01200 Carbon metabolism - Solanum lycopersicum (tomato); sly01230 Biosynthesis of amino acids - Solanum lycope…	IPR001926;	Tryptophan synthase beta subunit-like PLP-dependent enzyme;	E	KOG1252	Cystathionine beta-synthase and related enzymes
A0A1U8DSX1	Uncharacterized protein OS=Capsicum annuum OX=4072 GN=T459_21832	T459_21832	51.608	1.9257	9.6	4	4	1	0.943	1.064	1.05	1.002	0.934	1.022	0.968	0.53058	cytoplasm
A0A1U8DSX2	Mitogen-activated protein kinase OS=Capsicum annuum OX=4072 GN=T459_21839	T459_21839	42.918	8.6596	14.2	5	6	4	0.862	0.878	0.864	1.186	1.092	1.114	1.303	0.00049793	cytoplasm	GO:0016310 phosphorylation; GO:0044267 cellular protein metabolic process; GO:0044238 primary metabolic process; GO:0044237 cellular metabolic process; GO:0006796 phosphate-containing compound metabolic process; GO:0071704 organic substance metabolic process; GO:0008152 metabolic process; GO:0006468 protein phosphorylation; GO:0006793 phosphorus metabolic process; GO:0044260 cellular macromolecul…		GO:0005524 ATP binding; GO:1901265 nucleoside phosphate binding; GO:0016773 phosphotransferase activity, alcohol group as acceptor; GO:0001882 nucleoside binding; GO:0043167 ion binding; GO:0004672 protein kinase activity; GO:0000166 nucleotide binding; GO:0004702 signal transducer, downstream of receptor, with serine/threonine kinase activity; GO:0004871 signal transducer activity; GO:0004707 MA…	K20600	MPK4; mitogen-activated protein kinase 4 [EC:2.7.11.24]	sly04016 MAPK signaling pathway - plant - Solanum lycopersicum (tomato);	IPR000719; IPR011009;	Protein kinase domain; Protein kinase-like domain;	T	KOG0660	Mitogen-activated protein kinase
A0A1U8DT92	DEAD-box ATP-dependent RNA helicase 31 OS=Capsicum annuum OX=4072 GN=T459_21977	T459_21977	96.21	2.6658	1.4	1	2	1									chloroplast			GO:0005524 ATP binding; GO:1901265 nucleoside phosphate binding; GO:0001882 nucleoside binding; GO:0043167 ion binding; GO:0000166 nucleotide binding; GO:0097159 organic cyclic compound binding; GO:1901363 heterocyclic compound binding; GO:0032549 ribonucleoside binding; GO:0097367 carbohydrate derivative binding; GO:0032553 ribonucleotide binding; GO:0005488 binding; GO:0003676 nucleic acid bind…				IPR011545; IPR014014; IPR014001; IPR027417; IPR001650;	DEAD/DEAH box helicase domain; RNA helicase, DEAD-box type, Q motif; Helicase superfamily 1/2, ATP-binding domain; P-loop containing nucleoside triphosphate hydrolase; Helicase, C-terminal;	A	KOG0342	ATP-dependent RNA helicase pitchoune
A0A1U8DTB9	RING-type E3 ubiquitin transferase OS=Capsicum annuum OX=4072 GN=T459_22002	T459_22002	111.18	1.2499	0.9	1	1	1									nucleus	GO:0008152 metabolic process; GO:0032446 protein modification by small protein conjugation; GO:0016567 protein ubiquitination; GO:0044260 cellular macromolecule metabolic process; GO:0044267 cellular protein metabolic process; GO:0006464 cellular protein modification process; GO:0043170 macromolecule metabolic process; GO:0019538 protein metabolic process; GO:0070647 protein modification by small…		GO:0005515 protein binding; GO:0019787 ubiquitin-like protein transferase activity; GO:0003824 catalytic activity; GO:0016740 transferase activity; GO:0005488 binding; GO:0004842 ubiquitin-protein transferase activity;				IPR003613; IPR013083; IPR006911; IPR011989; IPR016024;	U box domain; Zinc finger, RING/FYVE/PHD-type; Armadillo repeat-containing domain; Armadillo-like helical; Armadillo-type fold;	S	KOG0167	FOG: Armadillo/beta-catenin-like repeats
A0A1U8DTC0	Uncharacterized protein OS=Capsicum annuum OX=4072 GN=T459_21167	T459_21167	48.267	20.221	24.4	8	10	8	1.005	0.979	0.991	0.948	0.964	1.12	1.019	0.79104	chloroplast							IPR029058;	Alpha/Beta hydrolase fold;
A0A1U8DTG3	"Alpha,alpha-trehalose-phosphate synthase [UDP-forming] 6 OS=Capsicum annuum OX=4072 GN=T459_21211"	T459_21211	97.243	16.981	8.1	6	7	5	0.947	1.013	1.055	1.017	0.97	1.009	0.994	0.88082	nucleus	GO:0016051 carbohydrate biosynthetic process; GO:0044711 single-organism biosynthetic process; GO:0044763 single-organism cellular process; GO:0044699 single-organism process; GO:0009058 biosynthetic process; GO:0005984 disaccharide metabolic process; GO:0005975 carbohydrate metabolic process; GO:0009312 oligosaccharide biosynthetic process; GO:0044238 primary metabolic process; GO:0044237 cellul…		GO:0003824 catalytic activity;	K16055	TPS; trehalose 6-phosphate synthase/phosphatase [EC:2.4.1.15 3.1.3.12]	sly00500 Starch and sucrose metabolism - Solanum lycopersicum (tomato); sly01100 Metabolic pathways - Solanum lycopersicum (tomato);	IPR001830; IPR023214;	Glycosyl transferase, family 20; HAD-like domain;	G	KOG1050	Trehalose-6-phosphate synthase component TPS1 and related subunits
A0A1U8DTI5	Uncharacterized protein OS=Capsicum annuum OX=4072 GN=T459_22134	T459_22134	60.426	3.3029	6.4	3	3	3									chloroplast
A0A1U8DTJ6	"Putative serine--tRNA ligase, cytoplasmic OS=Capsicum annuum OX=4072 GN=T459_22137"	T459_22137	51.252	31.039	23.6	8	14	8	1.024	0.979	0.967	0.983	0.941	1.009	0.988	0.6614	cytoplasm	GO:0006518 peptide metabolic process; GO:0006725 cellular aromatic compound metabolic process; GO:0044267 cellular protein metabolic process; GO:0044699 single-organism process; GO:0009058 biosynthetic process; GO:1901566 organonitrogen compound biosynthetic process; GO:0043039 tRNA aminoacylation; GO:0044237 cellular metabolic process; GO:0071704 organic substance metabolic process; GO:0008152 m…	GO:0044424 intracellular part; GO:0005623 cell; GO:0044464 cell part; GO:0005622 intracellular; GO:0005737 cytoplasm;	GO:0016876 ligase activity, forming aminoacyl-tRNA and related compounds; GO:0005524 ATP binding; GO:0004828 serine-tRNA ligase activity; GO:1901265 nucleoside phosphate binding; GO:0016875 ligase activity, forming carbon-oxygen bonds; GO:0001882 nucleoside binding; GO:0043167 ion binding; GO:0016874 ligase activity; GO:0000166 nucleotide binding; GO:0097159 organic cyclic compound binding; GO:19…	K01875	SARS; seryl-tRNA synthetase [EC:6.1.1.11]	sly00970 Aminoacyl-tRNA biosynthesis - Solanum lycopersicum (tomato);	IPR010978; IPR002314; IPR015866; IPR006195; IPR033729;	tRNA-binding arm; Aminoacyl-tRNA synthetase, class II (G/ P/ S/T); Serine-tRNA synthetase, type1, N-terminal; Aminoacyl-tRNA synthetase, class II; Serine-tRNA ligase catalytic core domain;	J	KOG2509	Seryl-tRNA synthetase
A0A1U8DTK0	Vacuolar protein sorting-associated protein 9A OS=Capsicum annuum OX=4072 GN=T459_22143	T459_22143	52.777	29.63	11.3	3	3	3	0.939	1.025	0.987	1.138	0.948	0.977	1.038	0.60598	nucleus				K20131			IPR003123;	VPS9 domain;	U	KOG2319	Vacuolar assembly/sorting protein VPS9
A0A1U8DTK8	Uncharacterized protein OS=Capsicum annuum OX=4072 GN=T459_22144	T459_22144	72.877	8.8458	5.6	3	3	3	0.936	1.065	0.95	1.129	0.79	1.155	1.042	0.83918	chloroplast	GO:0008152 metabolic process; GO:0005975 carbohydrate metabolic process; GO:0044238 primary metabolic process; GO:0071704 organic substance metabolic process;		GO:0004553 hydrolase activity, hydrolyzing O-glycosyl compounds; GO:0016787 hydrolase activity; GO:0003824 catalytic activity; GO:0016798 hydrolase activity, acting on glycosyl bonds;	K05349	bglX; beta-glucosidase [EC:3.2.1.21]	sly01110 Biosynthesis of secondary metabolites - Solanum lycopersicum (tomato); sly00500 Starch and sucrose metabolism - Solanum lycopersicum (tomato); sly00940 Phenylpropanoid biosynthesis - Solanum lycopersicum (tomato); sly00460 Cyanoamino acid metabolism - Solanum lycopersicum (tomato); sly01100 Metabolic pathways - Solanum lycopersicum (tomato);	IPR002772; IPR001764; IPR017853;	Glycoside hydrolase family 3 C-terminal domain; Glycoside hydrolase, family 3, N-terminal; Glycoside hydrolase superfamily;
A0A1U8DTN0	"Protease Do-like 5, chloroplastic OS=Capsicum annuum OX=4072 GN=T459_21266"	T459_21266	32.594	10.22	17.9	4	5	4	0.98	0.986	0.965	1.02	1.013	1.037	1.047	0.008036	chloroplast	GO:0006508 proteolysis; GO:0008152 metabolic process; GO:0043170 macromolecule metabolic process; GO:0019538 protein metabolic process; GO:0044238 primary metabolic process; GO:0071704 organic substance metabolic process;		GO:0004252 serine-type endopeptidase activity; GO:0004175 endopeptidase activity; GO:0008233 peptidase activity; GO:0003824 catalytic activity; GO:0017171 serine hydrolase activity; GO:0008236 serine-type peptidase activity; GO:0070011 peptidase activity, acting on L-amino acid peptides; GO:0016787 hydrolase activity;				IPR009003;	Peptidase S1, PA clan;	O	KOG1320	Serine protease
A0A1U8DTN9	"GDP-mannose 3,5-epimerase 1 OS=Capsicum annuum OX=4072 GN=T459_22182"	T459_22182	42.378	41.29	37.1	15	24	8	1.01	0.975	0.977	0.988	0.987	1.03	1.015	0.47264	cytoskeleton			GO:0097159 organic cyclic compound binding; GO:1901363 heterocyclic compound binding; GO:1901265 nucleoside phosphate binding; GO:0047918 GDP-mannose 3,5-epimerase activity; GO:0016853 isomerase activity; GO:0051287 NAD binding; GO:0003824 catalytic activity; GO:0016854 racemase and epimerase activity; GO:0016857 racemase and epimerase activity, acting on carbohydrates and derivatives; GO:0005488…	K10046	GME; GDP-D-mannose 3', 5'-epimerase [EC:5.1.3.18 5.1.3.-]	sly01110 Biosynthesis of secondary metabolites - Solanum lycopersicum (tomato); sly00053 Ascorbate and aldarate metabolism - Solanum lycopersicum (tomato); sly01100 Metabolic pathways - Solanum lycopersicum (tomato); sly00520 Amino sugar and nucleotide sugar metabolism - Solanum lycopersicum (tomato);	IPR001509; IPR016040; IPR033890;	NAD-dependent epimerase/dehydratase; NAD(P)-binding domain; GDP-mannose 3,5-epimerase;	GM	KOG1429	dTDP-glucose 4-6-dehydratase/UDP-glucuronic acid decarboxylase
A0A1U8DTP2	"Sec-independent protein translocase protein TATA, chloroplastic OS=Capsicum annuum OX=4072 GN=T459_22178"	T459_22178	15.891	2.035	8.6	1	4	1	1.079	1.024	1.048	0.954	1.03	0.888	0.911	0.106476	chloroplast	GO:0044763 single-organism cellular process; GO:0044699 single-organism process; GO:0071702 organic substance transport; GO:0015031 protein transport; GO:0051234 establishment of localization; GO:0045184 establishment of protein localization; GO:0006810 transport; GO:1902578 single-organism localization; GO:0032940 secretion by cell; GO:0009306 protein secretion; GO:0008104 protein localization; …	GO:0016020 membrane; GO:0044464 cell part; GO:0071944 cell periphery; GO:0044425 membrane part; GO:0031224 intrinsic component of membrane; GO:0005623 cell; GO:0016021 integral component of membrane; GO:0005886 plasma membrane;	GO:0022892 substrate-specific transporter activity; GO:0008565 protein transporter activity; GO:0005215 transporter activity;	K03116	tatA; sec-independent protein translocase protein TatA	sly03060 Protein export - Solanum lycopersicum (tomato);
A0A1U8DTP6	Uncharacterized protein OS=Capsicum annuum OX=4072 GN=T459_22183	T459_22183	36.023	2.434	7.1	2	3	2	0.768	0.906	0.857	1.159	1.109	1.197	1.369	0.0040768	cytoplasm
A0A1U8DTQ7	Uncharacterized protein OS=Capsicum annuum OX=4072 GN=T459_21359	T459_21359	25.038	63.434	43.9	7	10	7	0.754	0.746	0.783	1.239	1.199	1.258	1.619	1.9546e-05	nucleus				K04507			IPR015120; IPR007052; IPR007699; IPR008978;	Siah interacting protein, N-terminal; CS domain; SGS domain; HSP20-like chaperone;	T	KOG3260	Calcyclin-binding protein CacyBP
A0A1U8DTR2	Aminoacyl tRNA synthase complex-interacting multifunctional protein 1 OS=Capsicum annuum OX=4072 GN=T459_21355	T459_21355	30.47	30.826	27.8	7	11	7	1.009	1.054	1.029	0.986	0.99	0.948	0.946	0.040479	chloroplast			GO:0097159 organic cyclic compound binding; GO:1901363 heterocyclic compound binding; GO:0003723 RNA binding; GO:0000049 tRNA binding; GO:0005488 binding; GO:0003676 nucleic acid binding;	K15437			IPR012340; IPR002547;	Nucleic acid-binding, OB-fold; tRNA-binding domain;	J	KOG2241	tRNA-binding protein
A0A1U8DTV1	"Adenine nucleotide transporter BT1, chloroplastic/mitochondrial OS=Capsicum annuum OX=4072 GN=T459_21268"	T459_21268	42.439	1.7631	3.1	1	1	1	0.905	1.11	0.953	1.068	0.912	1.069	1.027	0.74668	chloroplast	GO:0006810 transport; GO:0055085 transmembrane transport; GO:0051179 localization; GO:0051234 establishment of localization;			K14684			IPR023395;	Mitochondrial carrier domain;	C	KOG0752	Mitochondrial solute carrier protein
A0A1U8DTY1	Rubredoxin 4 OS=Capsicum annuum OX=4072 GN=T459_22257	T459_22257	21.872	124.5	38.5	3	7	3	0.953	1.022	0.991	1.011	0.981	0.992	1.006	0.7867	chloroplast			GO:0046872 metal ion binding; GO:0043169 cation binding; GO:0005506 iron ion binding; GO:0046914 transition metal ion binding; GO:0005488 binding; GO:0043167 ion binding;				IPR024935; IPR024934; IPR004039;	Rubredoxin domain; Rubredoxin-like domain; Rubredoxin-type fold;
A0A1U8DU09	Profilin OS=Capsicum annuum OX=4072 GN=T459_21392	T459_21392	14.185	4.2433	16.8	3	6	3	1.021	0.979	0.976	0.968	1.055	0.993	1.013	0.68302	cytoplasm			GO:0003779 actin binding; GO:0005515 protein binding; GO:0008092 cytoskeletal protein binding; GO:0005488 binding;	K05759					Z	KOG1755	Profilin
A0A1U8DU50	Phosphoglycerate mutase-like protein AT74H OS=Capsicum annuum OX=4072 GN=T459_22329	T459_22329	34.719	2.6934	8.8	2	2	2	0.693	0.653	0.534	1.381	1.358	1.346	2.173	0.0101024	cytoplasm	GO:0008152 metabolic process;		GO:0003824 catalytic activity;
A0A1U8DU57	Senescence-associated protein 13 OS=Capsicum annuum OX=4072 GN=T459_22320	T459_22320	28.726	5.8213	14.1	5	6	4	1.043	1.006	0.953	0.999	1.051	0.949	0.999	0.97752	chloroplast			GO:0003824 catalytic activity; GO:0016491 oxidoreductase activity;	K08081	TR1; tropinone reductase I [EC:1.1.1.206]	sly01110 Biosynthesis of secondary metabolites - Solanum lycopersicum (tomato); sly01100 Metabolic pathways - Solanum lycopersicum (tomato); sly00960 Tropane, piperidine and pyridine alkaloid biosynthesis - Solanum lycopersicum (tomato);	IPR016040;	NAD(P)-binding domain;	R	KOG0725	Reductases with broad range of substrate specificities
A0A1U8DU79	Uncharacterized protein OS=Capsicum annuum OX=4072 GN=T459_21458	T459_21458	22.574	16.006	13.7	2	4	2	1.017	1.02	1.052	0.979	0.937	1.02	0.95	0.128103	nucleus							IPR008979; IPR010400;	Galactose-binding domain-like; PITH domain;	O	KOG1730	Thioredoxin-like protein
A0A1U8DU94	Peroxisomal adenine nucleotide carrier 1 OS=Capsicum annuum OX=4072 GN=T459_33126	T459_33126	34.389	3.3689	4.4	1	1	1									nucleus							IPR023395;	Mitochondrial carrier domain;	C	KOG0769	Predicted mitochondrial carrier protein
A0A1U8DUB7	Sucrose nonfermenting 4-like protein OS=Capsicum annuum OX=4072 GN=T459_32976	T459_32976	53.404	5.3056	5.4	2	3	2	0.955	1.087	1.003	1.157	0.844	0.978	0.978	0.78482	plasma membrane							IPR014756; IPR000644; IPR032640;	Immunoglobulin E-set; CBS domain; AMP-activated protein kinase, glycogen-binding domain;	C	KOG1764	5'-AMP-activated protein kinase, gamma subunit
A0A1U8DUK0	N6-adenosine-methyltransferase MT-A70-like OS=Capsicum annuum OX=4072 GN=T459_21568	T459_21568	80.56	2.3482	4.3	3	3	3	0.948	0.994	1.12	0.946	0.986	1.014	0.962	0.53244	chloroplast	GO:0008152 metabolic process; GO:0006725 cellular aromatic compound metabolic process; GO:0046483 heterocycle metabolic process; GO:0006139 nucleobase-containing compound metabolic process; GO:1901360 organic cyclic compound metabolic process; GO:0006807 nitrogen compound metabolic process; GO:0034641 cellular nitrogen compound metabolic process; GO:0044238 primary metabolic process; GO:0009987 c…		GO:0016741 transferase activity, transferring one-carbon groups; GO:0008168 methyltransferase activity; GO:0003824 catalytic activity; GO:0016740 transferase activity;	K05925			IPR029063;	S-adenosyl-L-methionine-dependent methyltransferase;	A	KOG2098	Predicted N6-adenine RNA methylase
A0A1U8DUK2	60S ribosomal protein L22-2 OS=Capsicum annuum OX=4072 GN=T459_34117	T459_34117	14.066	48.088	18.4	2	4	1	1.041	1.045	0.989	1.024	0.952	0.96	0.955	0.18526	nucleus	GO:0006518 peptide metabolic process; GO:0043043 peptide biosynthetic process; GO:0044267 cellular protein metabolic process; GO:0006807 nitrogen compound metabolic process; GO:0009058 biosynthetic process; GO:0043603 cellular amide metabolic process; GO:0044238 primary metabolic process; GO:1901566 organonitrogen compound biosynthetic process; GO:1901576 organic substance biosynthetic process; G…	GO:0005840 ribosome; GO:0043226 organelle; GO:0043229 intracellular organelle; GO:0043232 intracellular non-membrane-bounded organelle; GO:0044464 cell part; GO:0005622 intracellular; GO:0005737 cytoplasm; GO:0032991 macromolecular complex; GO:0044424 intracellular part; GO:1990904 ribonucleoprotein complex; GO:0005623 cell; GO:0030529 intracellular ribonucleoprotein complex; GO:0044444 cytoplasm…	GO:0003735 structural constituent of ribosome; GO:0005198 structural molecule activity;	K02891	RP-L22e; large subunit ribosomal protein L22e	sly03010 Ribosome - Solanum lycopersicum (tomato);
A0A1U8DUL4	Putative 60S ribosomal protein L18-1 OS=Capsicum annuum OX=4072 GN=T459_33707	T459_33707	20.877	31.656	40.6	7	10	4	1.026	1.043	1	0.971	0.979	0.968	0.951	0.0166794	nucleus				K02883	RP-L18e; large subunit ribosomal protein L18e	sly03010 Ribosome - Solanum lycopersicum (tomato);	IPR021131;	Ribosomal protein L18e/L15P;	J	KOG1714	60s ribosomal protein L18
A0A1U8DUP2	Uncharacterized protein OS=Capsicum annuum OX=4072 GN=T459_02576	T459_02576	29.824	21.69	11.4	2	3	1	0.872	0.943	0.957	1.066	1.101	1.058	1.163	0.0083375	chloroplast
A0A1U8DUR9	Uncharacterized protein OS=Capsicum annuum OX=4072 GN=T459_33662	T459_33662	39.608	95.049	40.7	14	29	12	0.975	0.957	0.956	1.038	1.046	1.037	1.081	0.0003632	chloroplast	GO:0050794 regulation of cellular process; GO:0042592 homeostatic process; GO:0065008 regulation of biological quality; GO:0050789 regulation of biological process; GO:0045454 cell redox homeostasis; GO:0044763 single-organism cellular process; GO:0019725 cellular homeostasis; GO:0044699 single-organism process; GO:0009987 cellular process; GO:0065007 biological regulation;	GO:0043226 organelle; GO:0043231 intracellular membrane-bounded organelle; GO:0043229 intracellular organelle; GO:0005783 endoplasmic reticulum; GO:0044464 cell part; GO:0005622 intracellular; GO:0005737 cytoplasm; GO:0012505 endomembrane system; GO:0044424 intracellular part; GO:0043227 membrane-bounded organelle; GO:0005623 cell; GO:0044444 cytoplasmic part;	GO:0016853 isomerase activity; GO:0003824 catalytic activity;	K09584	PDIA6; protein disulfide-isomerase A6 [EC:5.3.4.1]	sly04141 Protein processing in endoplasmic reticulum - Solanum lycopersicum (tomato);	IPR005788; IPR011679; IPR013766; IPR012336;	Disulphide isomerase; Endoplasmic reticulum, protein ERp29, C-terminal; Thioredoxin domain; Thioredoxin-like fold;	O	KOG0191	Thioredoxin/protein disulfide isomerase
A0A1U8DUS5	Uncharacterized protein OS=Capsicum annuum OX=4072 GN=T459_34593	T459_34593	18.38	4.511	16.1	3	4	3	0.985	0.969	0.819	1.08	1.095	1.19	1.213	0.041725	cytoplasm	GO:0006950 response to stress; GO:0050896 response to stimulus;						IPR014729; IPR006016;	Rossmann-like alpha/beta/alpha sandwich fold; UspA;
A0A1U8DUS7	Pyrophosphate-energized vacuolar membrane proton pump 1 OS=Capsicum annuum OX=4072 GN=T459_34590	T459_34590	80.065	4.1029	11	7	17	2	1.023	0.994	0.974	0.997	1.025	0.99	1.007	0.71016	vacuolar membrane	GO:0006810 transport; GO:1902578 single-organism localization; GO:0006812 cation transport; GO:0006811 ion transport; GO:0044699 single-organism process; GO:0051179 localization; GO:0015672 monovalent inorganic cation transport; GO:0006818 hydrogen transport; GO:0015992 proton transport; GO:0044765 single-organism transport; GO:0051234 establishment of localization;	GO:0016020 membrane;	GO:0022804 active transmembrane transporter activity; GO:0015405 P-P-bond-hydrolysis-driven transmembrane transporter activity; GO:0004427 inorganic diphosphatase activity; GO:0016462 pyrophosphatase activity; GO:0003824 catalytic activity; GO:0015399 primary active transmembrane transporter activity; GO:0016817 hydrolase activity, acting on acid anhydrides; GO:0016787 hydrolase activity; GO:0016…	K01507	ppa; inorganic pyrophosphatase [EC:3.6.1.1]	sly00190 Oxidative phosphorylation - Solanum lycopersicum (tomato);
A0A1U8DUW6	Nucleolar protein 56 OS=Capsicum annuum OX=4072 GN=T459_33078	T459_33078	62.001	6.5107	7.3	4	4	4	1.08	1.103	1.035	0.915	0.936	1	0.886	0.020298	cytoplasm				K14564	NOP56; nucleolar protein 56	sly03008 Ribosome biogenesis in eukaryotes - Solanum lycopersicum (tomato);	IPR002687; IPR012974; IPR012976;	Nop domain; NOP5, N-terminal; NOSIC;	AJ	KOG2573	Ribosome biogenesis protein - Nop56p/Sik1p
A0A1U8DUZ4	Uncharacterized protein OS=Capsicum annuum OX=4072 GN=T459_33096	T459_33096	53.939	4.4655	6.4	3	3	3	0.97	0.967	0.976	0.999	1.048	1.04	1.06	0.0186391	mitochondria			GO:0008233 peptidase activity; GO:0008238 exopeptidase activity; GO:0046914 transition metal ion binding; GO:0003824 catalytic activity; GO:0005488 binding; GO:0043167 ion binding; GO:0043169 cation binding; GO:0070011 peptidase activity, acting on L-amino acid peptides; GO:0046872 metal ion binding; GO:0016787 hydrolase activity; GO:0004177 aminopeptidase activity; GO:0030145 manganese ion bindi…	K01262			IPR007865; IPR000994; IPR029149; IPR028980;	Aminopeptidase P, N-terminal; Peptidase M24; Creatinase/Aminopeptidase P/Spt16, N-terminal; Creatinase/Aminopeptidase P, N-terminal;	E	KOG2414	Putative Xaa-Pro aminopeptidase
A0A1U8DV09	Putative serine/threonine-protein kinase OS=Capsicum annuum OX=4072 GN=T459_33924	T459_33924	56.891	10.94	11.2	4	4	4									chloroplast	GO:0016310 phosphorylation; GO:0044267 cellular protein metabolic process; GO:0044238 primary metabolic process; GO:0044237 cellular metabolic process; GO:0006796 phosphate-containing compound metabolic process; GO:0071704 organic substance metabolic process; GO:0008152 metabolic process; GO:0006468 protein phosphorylation; GO:0006793 phosphorus metabolic process; GO:0044260 cellular macromolecul…		GO:0005524 ATP binding; GO:1901265 nucleoside phosphate binding; GO:0016773 phosphotransferase activity, alcohol group as acceptor; GO:0001882 nucleoside binding; GO:0043167 ion binding; GO:0004672 protein kinase activity; GO:0000166 nucleotide binding; GO:0097159 organic cyclic compound binding; GO:1901363 heterocyclic compound binding; GO:0032549 ribonucleoside binding; GO:0097367 carbohydrate …				IPR000719; IPR011009;	Protein kinase domain; Protein kinase-like domain;	T	KOG1187	Serine/threonine protein kinase
A0A1U8DV20	Aspartic proteinase OS=Capsicum annuum OX=4072 GN=T459_33609	T459_33609	55.009	84.34	18.6	8	16	8	0.998	1.029	0.971	0.991	1.01	1.003	1.002	0.90474	chloroplast	GO:0008152 metabolic process; GO:0044710 single-organism metabolic process; GO:0044699 single-organism process; GO:0006508 proteolysis; GO:0019538 protein metabolic process; GO:0043170 macromolecule metabolic process; GO:0044238 primary metabolic process; GO:0006629 lipid metabolic process; GO:0071704 organic substance metabolic process;		GO:0004175 endopeptidase activity; GO:0008233 peptidase activity; GO:0003824 catalytic activity; GO:0004190 aspartic-type endopeptidase activity; GO:0070011 peptidase activity, acting on L-amino acid peptides; GO:0016787 hydrolase activity; GO:0070001 aspartic-type peptidase activity;	K08245			IPR033869; IPR008139; IPR011001; IPR021109; IPR033121; IPR007856; IPR008138;	Phytepsin; Saposin B type domain; Saposin-like; Aspartic peptidase domain; Peptidase family A1 domain; Saposin-like type B, region 1; Saposin B type, region 2;	O	KOG1339	Aspartyl protease
A0A1U8DV28	50S ribosomal protein L14 OS=Capsicum annuum OX=4072 GN=T459_21746	T459_21746	18.16	2.0369	6.6	1	1	1									chloroplast	GO:0006518 peptide metabolic process; GO:0043043 peptide biosynthetic process; GO:0044267 cellular protein metabolic process; GO:0006807 nitrogen compound metabolic process; GO:0009058 biosynthetic process; GO:0043603 cellular amide metabolic process; GO:0044238 primary metabolic process; GO:1901566 organonitrogen compound biosynthetic process; GO:1901576 organic substance biosynthetic process; G…	GO:0005840 ribosome; GO:0043229 intracellular organelle; GO:0043232 intracellular non-membrane-bounded organelle; GO:0044446 intracellular organelle part; GO:0005737 cytoplasm; GO:0032991 macromolecular complex; GO:0044424 intracellular part; GO:0005623 cell; GO:0044422 organelle part; GO:0043228 non-membrane-bounded organelle; GO:0043226 organelle; GO:0015934 large ribosomal subunit; GO:0044391 …	GO:0003735 structural constituent of ribosome; GO:0005198 structural molecule activity;	K02874	RP-L14; large subunit ribosomal protein L14	sly03010 Ribosome - Solanum lycopersicum (tomato);			J	KOG0901	60S ribosomal protein L14/L17/L23
A0A1U8DV30	Putative carbohydrate esterase OS=Capsicum annuum OX=4072 GN=T459_33600	T459_33600	29.531	19.199	14.5	4	9	4	1.017	1.045	1.041	0.97	0.983	0.944	0.934	0.0092995	chloroplast							IPR005181; IPR013830;	Sialate O-acetylesterase domain; SGNH hydrolase-type esterase domain;
A0A1U8DV73	Putative leucine-rich repeat receptor-like protein kinase OS=Capsicum annuum OX=4072 GN=T459_33944	T459_33944	105.19	10.516	7.3	6	6	5	1.027	1.03	1.035	0.977	0.942	0.989	0.94	0.053223	plasma membrane	GO:0016310 phosphorylation; GO:0044267 cellular protein metabolic process; GO:0044238 primary metabolic process; GO:0044237 cellular metabolic process; GO:0006796 phosphate-containing compound metabolic process; GO:0071704 organic substance metabolic process; GO:0008152 metabolic process; GO:0006468 protein phosphorylation; GO:0006793 phosphorus metabolic process; GO:0044260 cellular macromolecul…		GO:0005524 ATP binding; GO:1901265 nucleoside phosphate binding; GO:0016773 phosphotransferase activity, alcohol group as acceptor; GO:0001882 nucleoside binding; GO:0043167 ion binding; GO:0004672 protein kinase activity; GO:0000166 nucleotide binding; GO:0097159 organic cyclic compound binding; GO:1901363 heterocyclic compound binding; GO:0032549 ribonucleoside binding; GO:0097367 carbohydrate …				IPR000719; IPR013210; IPR001245; IPR032675; IPR013320; IPR011009;	Protein kinase domain; Leucine-rich repeat-containing N-terminal, plant-type; Serine-threonine/tyrosine-protein kinase catalytic domain; Leucine-rich repeat domain, L domain-like; Concanavalin A-like lectin/glucanase domain; Protein kinase-like domain;	R	KOG0619	FOG: Leucine rich repeat
A0A1U8DV81	"2-C-methyl-D-erythritol 4-phosphate cytidylyltransferase, chloroplastic OS=Capsicum annuum OX=4072 GN=T459_33932"	T459_33932	34.528	45.464	36.5	10	19	10	0.974	0.991	1.008	1.024	0.993	1.01	1.018	0.24722	chloroplast	GO:0006720 isoprenoid metabolic process; GO:0044711 single-organism biosynthetic process; GO:0044763 single-organism cellular process; GO:0044699 single-organism process; GO:0009058 biosynthetic process; GO:0044255 cellular lipid metabolic process; GO:0044238 primary metabolic process; GO:1901576 organic substance biosynthetic process; GO:0044237 cellular metabolic process; GO:0044249 cellular bi…		GO:0050518 2-C-methyl-D-erythritol 4-phosphate cytidylyltransferase activity; GO:0070567 cytidylyltransferase activity; GO:0016779 nucleotidyltransferase activity; GO:0003824 catalytic activity; GO:0016740 transferase activity; GO:0016772 transferase activity, transferring phosphorus-containing groups;	K00991	ispD; 2-C-methyl-D-erythritol 4-phosphate cytidylyltransferase [EC:2.7.7.60]	sly01110 Biosynthesis of secondary metabolites - Solanum lycopersicum (tomato); sly00900 Terpenoid backbone biosynthesis - Solanum lycopersicum (tomato); sly01100 Metabolic pathways - Solanum lycopersicum (tomato);	IPR029044;	Nucleotide-diphospho-sugar transferases;
A0A1U8DV83	"Histidine--tRNA ligase, cytoplasmic OS=Capsicum annuum OX=4072 GN=T459_33934"	T459_33934	98.598	35.412	17.8	14	18	14	0.99	1.005	1.023	1.004	1.018	0.973	0.992	0.66144	chloroplast	GO:0006518 peptide metabolic process; GO:0006725 cellular aromatic compound metabolic process; GO:0044267 cellular protein metabolic process; GO:0044699 single-organism process; GO:0009058 biosynthetic process; GO:1901566 organonitrogen compound biosynthetic process; GO:0043039 tRNA aminoacylation; GO:0044237 cellular metabolic process; GO:0071704 organic substance metabolic process; GO:0008152 m…		GO:0016876 ligase activity, forming aminoacyl-tRNA and related compounds; GO:0005524 ATP binding; GO:1901265 nucleoside phosphate binding; GO:0016875 ligase activity, forming carbon-oxygen bonds; GO:0001882 nucleoside binding; GO:0043167 ion binding; GO:0016874 ligase activity; GO:0000166 nucleotide binding; GO:0097159 organic cyclic compound binding; GO:1901363 heterocyclic compound binding; GO:…	K01892	HARS; histidyl-tRNA synthetase [EC:6.1.1.21]	sly00970 Aminoacyl-tRNA biosynthesis - Solanum lycopersicum (tomato);	IPR008948; IPR004154; IPR006195;	L-Aspartase-like; Anticodon-binding; Aminoacyl-tRNA synthetase, class II;	J	KOG1936	Histidyl-tRNA synthetase
A0A1U8DVD1	CAAX prenyl protease 1-like protein OS=Capsicum annuum OX=4072 GN=T459_21836	T459_21836	48.665	4.7208	5	2	2	2	0.919	1.001	1.018	1.053	0.972	1.047	1.046	0.33296	cytoplasm	GO:0006508 proteolysis; GO:0008152 metabolic process; GO:0043170 macromolecule metabolic process; GO:0019538 protein metabolic process; GO:0044238 primary metabolic process; GO:0071704 organic substance metabolic process;		GO:0004175 endopeptidase activity; GO:0004222 metalloendopeptidase activity; GO:0008233 peptidase activity; GO:0003824 catalytic activity; GO:0070011 peptidase activity, acting on L-amino acid peptides; GO:0016787 hydrolase activity; GO:0008237 metallopeptidase activity;	K06013	STE24; STE24 endopeptidase [EC:3.4.24.84]	sly00900 Terpenoid backbone biosynthesis - Solanum lycopersicum (tomato);	IPR001915; IPR032456;	Peptidase M48; CAAX prenyl protease 1, N-terminal;	R	KOG2719	Metalloprotease
A0A1U8DVD3	Cytochrome c OS=Capsicum annuum OX=4072 GN=T459_32486	T459_32486	12.109	1.3611	7.1	1	2	1	0.983	1.146	0.981	1.02	0.936	0.951	0.935	0.3208	mitochondria			GO:0097159 organic cyclic compound binding; GO:1901363 heterocyclic compound binding; GO:0009055 electron carrier activity; GO:0020037 heme binding; GO:0046906 tetrapyrrole binding; GO:0005488 binding;	K08738			IPR009056;	Cytochrome c-like domain;	C	KOG3453	Cytochrome c
A0A1U8DVF8	60S ribosomal protein L3 OS=Capsicum annuum OX=4072 GN=T459_32459	T459_32459	44.323	23.98	39.3	16	35	7	1.068	1.016	1.011	0.952	0.975	1.004	0.947	0.080038	cytoplasm	GO:0006518 peptide metabolic process; GO:0043043 peptide biosynthetic process; GO:0044267 cellular protein metabolic process; GO:0006807 nitrogen compound metabolic process; GO:0009058 biosynthetic process; GO:0043603 cellular amide metabolic process; GO:0044238 primary metabolic process; GO:1901566 organonitrogen compound biosynthetic process; GO:1901576 organic substance biosynthetic process; G…	GO:0005840 ribosome; GO:0043226 organelle; GO:0043229 intracellular organelle; GO:0043232 intracellular non-membrane-bounded organelle; GO:0044464 cell part; GO:0005622 intracellular; GO:0005737 cytoplasm; GO:0032991 macromolecular complex; GO:0044424 intracellular part; GO:1990904 ribonucleoprotein complex; GO:0005623 cell; GO:0030529 intracellular ribonucleoprotein complex; GO:0044444 cytoplasm…	GO:0003735 structural constituent of ribosome; GO:0005198 structural molecule activity;	K02925	RP-L3e; large subunit ribosomal protein L3e	sly03010 Ribosome - Solanum lycopersicum (tomato);	IPR009000;	Translation protein, beta-barrel domain;	J	KOG0746	60S ribosomal protein L3 and related proteins
A0A1U8DVJ1	GDSL esterase/lipase OS=Capsicum annuum OX=4072 GN=T459_21944	T459_21944	42.575	1.2713	2.8	1	1	1									chloroplast			GO:0016787 hydrolase activity; GO:0003824 catalytic activity; GO:0016788 hydrolase activity, acting on ester bonds;				IPR001087; IPR013830;	GDSL lipase/esterase; SGNH hydrolase-type esterase domain;
A0A1U8DVJ9	"NifU-like protein 2, chloroplastic OS=Capsicum annuum OX=4072 GN=T459_32438"	T459_32438	26.143	1.393	4.9	1	1	1									chloroplast	GO:0006790 sulfur compound metabolic process; GO:0044085 cellular component biogenesis; GO:0051188 cofactor biosynthetic process; GO:0016043 cellular component organization; GO:0008152 metabolic process; GO:0031163 metallo-sulfur cluster assembly; GO:0022607 cellular component assembly; GO:0016226 iron-sulfur cluster assembly; GO:0009058 biosynthetic process; GO:0009987 cellular process; GO:00442…		GO:0005506 iron ion binding; GO:0046914 transition metal ion binding; GO:0051536 iron-sulfur cluster binding; GO:0005488 binding; GO:0043167 ion binding; GO:0046872 metal ion binding; GO:0043169 cation binding; GO:0051540 metal cluster binding;				IPR001075;	NIF system FeS cluster assembly, NifU, C-terminal;	O	KOG2358	NifU-like domain-containing proteins
A0A1U8DVK6	40S ribosomal protein S12 OS=Capsicum annuum OX=4072 GN=T459_32428	T459_32428	15.126	112	61.5	8	18	8	1.022	1.021	1.04	0.957	1.019	0.935	0.944	0.092679	cytoplasm	GO:0006518 peptide metabolic process; GO:0043043 peptide biosynthetic process; GO:0044267 cellular protein metabolic process; GO:0006807 nitrogen compound metabolic process; GO:0009058 biosynthetic process; GO:0043603 cellular amide metabolic process; GO:0044238 primary metabolic process; GO:1901566 organonitrogen compound biosynthetic process; GO:1901576 organic substance biosynthetic process; G…	GO:0005840 ribosome; GO:0043226 organelle; GO:0043229 intracellular organelle; GO:0043232 intracellular non-membrane-bounded organelle; GO:0044464 cell part; GO:0005622 intracellular; GO:0005737 cytoplasm; GO:0032991 macromolecular complex; GO:0044424 intracellular part; GO:1990904 ribonucleoprotein complex; GO:0005623 cell; GO:0030529 intracellular ribonucleoprotein complex; GO:0044444 cytoplasm…	GO:0003735 structural constituent of ribosome; GO:0005198 structural molecule activity;	K02951	RP-S12e; small subunit ribosomal protein S12e	sly03010 Ribosome - Solanum lycopersicum (tomato);	IPR029064; IPR004038;	50S ribosomal protein L30e-like; Ribosomal protein L7Ae/L30e/S12e/Gadd45;	J	KOG3406	40S ribosomal protein S12
A0A1U8DVL9	Ferredoxin OS=Capsicum annuum OX=4072 GN=T459_32412	T459_32412	15.193	41.125	30.6	2	5	2	0.967	0.955	1.019	1.001	1.016	0.976	1.018	0.48376	chloroplast	GO:0008152 metabolic process; GO:0006091 generation of precursor metabolites and energy; GO:0044710 single-organism metabolic process; GO:0055114 oxidation-reduction process; GO:0044763 single-organism cellular process; GO:0022900 electron transport chain; GO:0044699 single-organism process; GO:0044237 cellular metabolic process; GO:0009987 cellular process;		GO:0009055 electron carrier activity; GO:0051537 2 iron, 2 sulfur cluster binding; GO:0005488 binding; GO:0051536 iron-sulfur cluster binding; GO:0051540 metal cluster binding;	K02639	petF; ferredoxin	sly00195 Photosynthesis - Solanum lycopersicum (tomato);	IPR001041; IPR012675;	2Fe-2S ferredoxin-type iron-sulfur binding domain; Beta-grasp domain;
A0A1U8DVW7	60S ribosomal protein L3 OS=Capsicum annuum OX=4072 GN=T459_33859	T459_33859	44.351	65.004	43.4	17	38	8	1.045	1.058	1.076	0.928	0.958	0.969	0.898	0.0022411	cytoplasm	GO:0006518 peptide metabolic process; GO:0043043 peptide biosynthetic process; GO:0044267 cellular protein metabolic process; GO:0006807 nitrogen compound metabolic process; GO:0009058 biosynthetic process; GO:0043603 cellular amide metabolic process; GO:0044238 primary metabolic process; GO:1901566 organonitrogen compound biosynthetic process; GO:1901576 organic substance biosynthetic process; G…	GO:0005840 ribosome; GO:0043226 organelle; GO:0043229 intracellular organelle; GO:0043232 intracellular non-membrane-bounded organelle; GO:0044464 cell part; GO:0005622 intracellular; GO:0005737 cytoplasm; GO:0032991 macromolecular complex; GO:0044424 intracellular part; GO:1990904 ribonucleoprotein complex; GO:0005623 cell; GO:0030529 intracellular ribonucleoprotein complex; GO:0044444 cytoplasm…	GO:0003735 structural constituent of ribosome; GO:0005198 structural molecule activity;	K02925	RP-L3e; large subunit ribosomal protein L3e	sly03010 Ribosome - Solanum lycopersicum (tomato);	IPR009000;	Translation protein, beta-barrel domain;	J	KOG0746	60S ribosomal protein L3 and related proteins
A0A1U8DW12	Flowering locus K-like proteiny domain OS=Capsicum annuum OX=4072 GN=T459_22145	T459_22145	51.746	70.884	27.1	10	14	10	0.93	0.984	0.936	1.048	1.029	1.075	1.106	0.0099612	cytoplasm			GO:0097159 organic cyclic compound binding; GO:1901363 heterocyclic compound binding; GO:0003723 RNA binding; GO:0005488 binding; GO:0003676 nucleic acid binding;	K21444			IPR004087; IPR004088;	K Homology domain; K Homology domain, type 1;	AR	KOG2190	PolyC-binding proteins alphaCP-1 and related KH domain proteins
A0A1U8DW23	Peroxidase OS=Capsicum annuum OX=4072 GN=T459_32043	T459_32043	36.129	71.306	23.5	7	9	7	0.755	0.755	0.794	1.22	1.178	1.217	1.569	2.2029e-05	plasma membrane	GO:0008152 metabolic process; GO:0042743 hydrogen peroxide metabolic process; GO:0006950 response to stress; GO:0072593 reactive oxygen species metabolic process; GO:0055114 oxidation-reduction process; GO:0044710 single-organism metabolic process; GO:0006979 response to oxidative stress; GO:0044699 single-organism process; GO:0044248 cellular catabolic process; GO:0050896 response to stimulus; G…		GO:0097159 organic cyclic compound binding; GO:1901363 heterocyclic compound binding; GO:0020037 heme binding; GO:0003824 catalytic activity; GO:0005488 binding; GO:0016209 antioxidant activity; GO:0004601 peroxidase activity; GO:0046906 tetrapyrrole binding; GO:0016491 oxidoreductase activity; GO:0016684 oxidoreductase activity, acting on peroxide as acceptor;	K00430	E1.11.1.7; peroxidase [EC:1.11.1.7]	sly01110 Biosynthesis of secondary metabolites - Solanum lycopersicum (tomato); sly00940 Phenylpropanoid biosynthesis - Solanum lycopersicum (tomato); sly01100 Metabolic pathways - Solanum lycopersicum (tomato);	IPR033905; IPR002016;	Secretory peroxidase; Haem peroxidase, plant/fungal/bacterial;
A0A1U8DW33	Uncharacterized protein OS=Capsicum annuum OX=4072 GN=T459_32035	T459_32035	17.48	1.4254	6.4	1	1	1									nucleus
A0A1U8DW50	Tobamovirus multiplication protein 1 OS=Capsicum annuum OX=4072 GN=T459_32025	T459_32025	33.41	1.8091	5.5	2	3	2	1.037	0.994	0.964	1.048	0.986	0.978	1.006	0.86206	cytoplasm							IPR009457;	Domain of unknown function DUF1084;
A0A1U8DW89	Calmodulin OS=Capsicum annuum OX=4072 GN=T459_31996	T459_31996	16.951	4.8977	17.7	2	2	2									cytoplasm			GO:0043169 cation binding; GO:0046872 metal ion binding; GO:0005509 calcium ion binding; GO:0005488 binding; GO:0043167 ion binding;	K02183	CALM; calmodulin	sly04016 MAPK signaling pathway - plant - Solanum lycopersicum (tomato); sly04626 Plant-pathogen interaction - Solanum lycopersicum (tomato); sly04070 Phosphatidylinositol signaling system - Solanum lycopersicum (tomato);	IPR011992; IPR002048;	EF-hand domain pair; EF-hand domain;	T	KOG0027	Calmodulin and related proteins (EF-Hand superfamily)
A0A1U8DW99	Peptidyl-prolyl cis-trans isomerase FKBP12 OS=Capsicum annuum OX=4072 GN=T459_31988	T459_31988	12.088	10.724	27.7	2	5	2	1.016	0.987	1	0.995	0.985	1.023	1	0.9969	chloroplast				K01802			IPR001179;	FKBP-type peptidyl-prolyl cis-trans isomerase domain;	O	KOG0544	FKBP-type peptidyl-prolyl cis-trans isomerase
A0A1U8DWB3	Putative steroid-binding protein 3 OS=Capsicum annuum OX=4072 GN=T459_17034	T459_17034	10.695	30.034	35.4	3	5	3	1.043	1.063	1.02	0.954	0.997	0.932	0.922	0.024544	chloroplast				K17278			IPR001199;	Cytochrome b5-like heme/steroid binding domain;	R	KOG1110	Putative steroid membrane receptor Hpr6.6/25-Dx
A0A1U8DWC4	Nicotinamidase 1 OS=Capsicum annuum OX=4072 GN=T459_31951	T459_31951	27.464	2.1653	3.7	1	1	1	0.972	1.028	1.076	1.029	0.943	0.966	0.955	0.30892	cytoplasm	GO:0008152 metabolic process;		GO:0003824 catalytic activity;				IPR000868;	Isochorismatase-like;
A0A1U8DWE0	"PsbP domain-containing protein 1, chloroplastic OS=Capsicum annuum OX=4072 GN=T459_31940"	T459_31940	32.513	92.844	43.8	11	18	11	1.009	1.004	0.97	1.024	1.001	1.016	1.019	0.24078	chloroplast	GO:0008152 metabolic process; GO:0044237 cellular metabolic process; GO:0009987 cellular process; GO:0015979 photosynthesis;	GO:0016020 membrane; GO:0009523 photosystem II; GO:0019898 extrinsic component of membrane; GO:0098796 membrane protein complex; GO:0009654 photosystem II oxygen evolving complex; GO:0042651 thylakoid membrane; GO:0032991 macromolecular complex; GO:0044424 intracellular part; GO:0005623 cell; GO:0034357 photosynthetic membrane; GO:0009521 photosystem; GO:1902494 catalytic complex; GO:0044425 memb…	GO:0043169 cation binding; GO:0046872 metal ion binding; GO:0005509 calcium ion binding; GO:0005488 binding; GO:0043167 ion binding;				IPR016123;	Mog1/PsbP, alpha/beta/alpha sandwich;
A0A1U8DWR1	18.5 kDa class I heat shock protein OS=Capsicum annuum OX=4072 GN=T459_32220	T459_32220	18.225	55.893	30.2	5	12	2	0.169	0.19	0.15	1.826	1.801	1.78	10.623	0.00083969	cytoplasm				K13993	HSP20; HSP20 family protein	sly04141 Protein processing in endoplasmic reticulum - Solanum lycopersicum (tomato);	IPR002068; IPR008978;	Alpha crystallin/Hsp20 domain; HSP20-like chaperone;	O	KOG0710	Molecular chaperone (small heat-shock protein Hsp26/Hsp42)
A0A1U8DWU8	Methylthioribose kinase OS=Capsicum annuum OX=4072 GN=T459_32187	T459_32187	47.738	14.706	16.9	6	8	6	1.038	1.11	0.989	0.971	0.925	0.987	0.919	0.096744	chloroplast	GO:0000097 sulfur amino acid biosynthetic process; GO:0016053 organic acid biosynthetic process; GO:0009066 aspartate family amino acid metabolic process; GO:0044699 single-organism process; GO:0009058 biosynthetic process; GO:1901566 organonitrogen compound biosynthetic process; GO:0044237 cellular metabolic process; GO:0044272 sulfur compound biosynthetic process; GO:0000096 sulfur amino acid m…		GO:0046522 S-methyl-5-thioribose kinase activity; GO:0016301 kinase activity; GO:0016773 phosphotransferase activity, alcohol group as acceptor; GO:0003824 catalytic activity; GO:0016740 transferase activity; GO:0016772 transferase activity, transferring phosphorus-containing groups;	K00899	mtnK; 5-methylthioribose kinase [EC:2.7.1.100]	sly00270 Cysteine and methionine metabolism - Solanum lycopersicum (tomato); sly01100 Metabolic pathways - Solanum lycopersicum (tomato);	IPR002575; IPR011009;	Aminoglycoside phosphotransferase; Protein kinase-like domain;
A0A1U8DWV6	Uncharacterized protein OS=Capsicum annuum OX=4072 GN=T459_02568	T459_02568	92.347	9.9955	5.7	5	8	5	1.054	0.981	0.946	1.039	1.04	0.936	1.011	0.82502	chloroplast				K01205	NAGLU; alpha-N-acetylglucosaminidase [EC:3.2.1.50]	sly00531 Glycosaminoglycan degradation - Solanum lycopersicum (tomato); sly01100 Metabolic pathways - Solanum lycopersicum (tomato);	IPR024733; IPR024240; IPR024732; IPR017853;	Alpha-N-acetylglucosaminidase, tim-barrel domain; Alpha-N-acetylglucosaminidase, N-terminal; Alpha-N-acetylglucosaminidase, C-terminal; Glycoside hydrolase superfamily;	U	KOG2233	Alpha-N-acetylglucosaminidase
A0A1U8DWX6	Uncharacterized protein OS=Capsicum annuum OX=4072 GN=T459_33523	T459_33523	67.477	119.91	24.2	10	17	10	1.017	0.996	1.024	1.007	0.989	1.002	0.987	0.26386	nucleus	GO:0008152 metabolic process; GO:0016311 dephosphorylation; GO:0044237 cellular metabolic process; GO:0006793 phosphorus metabolic process; GO:0009987 cellular process; GO:0006796 phosphate-containing compound metabolic process;		GO:0004725 protein tyrosine phosphatase activity; GO:0003824 catalytic activity; GO:0042578 phosphoric ester hydrolase activity; GO:0016791 phosphatase activity; GO:0005488 binding; GO:0016788 hydrolase activity, acting on ester bonds; GO:0005515 protein binding; GO:0016787 hydrolase activity; GO:0004721 phosphoprotein phosphatase activity;	K01110	PTEN; phosphatidylinositol-3,4,5-trisphosphate 3-phosphatase and dual-specificity protein phosphatase PTEN [EC:3.1.3.16 3.1.3.48 3.1.3.67]	sly00562 Inositol phosphate metabolism - Solanum lycopersicum (tomato); sly01100 Metabolic pathways - Solanum lycopersicum (tomato); sly04070 Phosphatidylinositol signaling system - Solanum lycopersicum (tomato);	IPR029021; IPR029023; IPR014020; IPR000008;	Protein-tyrosine phosphatase-like; Tensin phosphatase, lipid phosphatase domain; Tensin phosphatase, C2 domain; C2 domain;	TR	KOG2283	Clathrin coat dissociation kinase GAK/PTEN/Auxilin and related tyrosine phosphatases
A0A1U8DWY6	Uncharacterized protein OS=Capsicum annuum OX=4072 GN=T459_34106	T459_34106	37.361	3.6546	3.6	1	1	1	0.904	1.301	0.71	1.27	0.867	0.975	1.068	0.70922	chloroplast
A0A1U8DX14	PI-PLC X domain-containing protein OS=Capsicum annuum OX=4072 GN=T459_33050	T459_33050	44.268	6.6058	9	3	3	2									extracellular	GO:0044699 single-organism process; GO:0008152 metabolic process; GO:0044238 primary metabolic process; GO:0044710 single-organism metabolic process; GO:0006629 lipid metabolic process; GO:0071704 organic substance metabolic process;		GO:0008081 phosphoric diester hydrolase activity; GO:0016787 hydrolase activity; GO:0003824 catalytic activity; GO:0042578 phosphoric ester hydrolase activity; GO:0016788 hydrolase activity, acting on ester bonds;				IPR000909; IPR017946;	Phosphatidylinositol-specific phospholipase C, X domain; PLC-like phosphodiesterase, TIM beta/alpha-barrel domain;
A0A1U8DX33	Putative fucosyltransferase-like protein OS=Capsicum annuum OX=4072 GN=T459_33039	T459_33039	57.36	1.8057	2	1	1	1	0.809	1.027	1.079	1.115	0.919	1.068	1.064	0.56624	cytoplasm	GO:0006486 protein glycosylation; GO:0043413 macromolecule glycosylation; GO:0009101 glycoprotein biosynthetic process; GO:0044763 single-organism cellular process; GO:0044267 cellular protein metabolic process; GO:0009100 glycoprotein metabolic process; GO:0044699 single-organism process; GO:0009058 biosynthetic process; GO:0044238 primary metabolic process; GO:0044237 cellular metabolic process…	GO:0016020 membrane;	GO:0008417 fucosyltransferase activity; GO:0016757 transferase activity, transferring glycosyl groups; GO:0016758 transferase activity, transferring hexosyl groups; GO:0003824 catalytic activity; GO:0016740 transferase activity;	K00753	E2.4.1.214; glycoprotein 3-alpha-L-fucosyltransferase [EC:2.4.1.214]	sly01100 Metabolic pathways - Solanum lycopersicum (tomato);			GE	KOG2619	Fucosyltransferase
A0A1U8DX39	Uncharacterized protein OS=Capsicum annuum OX=4072 GN=T459_33029	T459_33029	71.101	3.1705	5.7	3	3	3	1.218	1.146	1.024	0.901	0.869	0.861	0.777	0.0089357	mitochondria			GO:0043169 cation binding; GO:0046872 metal ion binding; GO:0005515 protein binding; GO:0008270 zinc ion binding; GO:0046914 transition metal ion binding; GO:0005488 binding; GO:0043167 ion binding;				IPR011990; IPR032867;	Tetratricopeptide-like helical domain; DYW domain;	R	KOG4197	FOG: PPR repeat
A0A1U8DX44	Uncharacterized protein OS=Capsicum annuum OX=4072 GN=T459_02720	T459_02720	47.18	3.467	3.3	1	1	1	0.999	1.02	1.037	1.001	0.996	0.955	0.966	0.132398	chloroplast
A0A1U8DX52	Uncharacterized protein OS=Capsicum annuum OX=4072 GN=T459_02579	T459_02579	28.345	3.5104	7.3	2	2	1	0.984	1.029	1.062	0.992	0.941	1.003	0.955	0.194204	chloroplast
A0A1U8DX54	Uncharacterized protein OS=Capsicum annuum OX=4072 GN=T459_33013	T459_33013	34.518	2.1087	7.4	2	2	2	1.001	1.048	1.113	0.984	0.858	1.017	0.904	0.165259	cytoplasm	GO:0008152 metabolic process;		GO:0016787 hydrolase activity; GO:0003824 catalytic activity;				IPR029058; IPR013094;	Alpha/Beta hydrolase fold; Alpha/beta hydrolase fold-3;	V	KOG1515	Arylacetamide deacetylase
A0A1U8DX63	GTP-binding protein SAR1B OS=Capsicum annuum OX=4072 GN=T459_34595	T459_34595	22.021	41.577	51.3	9	14	2	1.017	1.013	0.969	0.972	0.978	1.059	1.003	0.9338	cytoplasm	GO:0045184 establishment of protein localization; GO:0006810 transport; GO:0046907 intracellular transport; GO:0070727 cellular macromolecule localization; GO:0051649 establishment of localization in cell; GO:0006886 intracellular protein transport; GO:0071702 organic substance transport; GO:0008104 protein localization; GO:0033036 macromolecule localization; GO:0034613 cellular protein localizat…	GO:0005623 cell; GO:0005622 intracellular; GO:0044464 cell part;	GO:1901265 nucleoside phosphate binding; GO:0001882 nucleoside binding; GO:0043167 ion binding; GO:0000166 nucleotide binding; GO:0097159 organic cyclic compound binding; GO:1901363 heterocyclic compound binding; GO:0032549 ribonucleoside binding; GO:0097367 carbohydrate derivative binding; GO:0032553 ribonucleotide binding; GO:0005488 binding; GO:0032550 purine ribonucleoside binding; GO:0043168…	K07953	SAR1; GTP-binding protein SAR1 [EC:3.6.5.-]	sly04141 Protein processing in endoplasmic reticulum - Solanum lycopersicum (tomato);	IPR005225; IPR027417;	Small GTP-binding protein domain; P-loop containing nucleoside triphosphate hydrolase;	U	KOG0077	Vesicle coat complex COPII, GTPase subunit SAR1
A0A1U8DXB3	Putative receptor protein kinase TMK1 OS=Capsicum annuum OX=4072 GN=T459_31754	T459_31754	102.5	5.4574	4.2	3	3	3									nucleus	GO:0016310 phosphorylation; GO:0044267 cellular protein metabolic process; GO:0044238 primary metabolic process; GO:0044237 cellular metabolic process; GO:0006796 phosphate-containing compound metabolic process; GO:0071704 organic substance metabolic process; GO:0008152 metabolic process; GO:0006468 protein phosphorylation; GO:0006793 phosphorus metabolic process; GO:0044260 cellular macromolecul…		GO:0005524 ATP binding; GO:1901265 nucleoside phosphate binding; GO:0016773 phosphotransferase activity, alcohol group as acceptor; GO:0001882 nucleoside binding; GO:0043167 ion binding; GO:0004672 protein kinase activity; GO:0000166 nucleotide binding; GO:0097159 organic cyclic compound binding; GO:1901363 heterocyclic compound binding; GO:0032549 ribonucleoside binding; GO:0097367 carbohydrate …				IPR000719; IPR013210; IPR032675; IPR013320; IPR011009;	Protein kinase domain; Leucine-rich repeat-containing N-terminal, plant-type; Leucine-rich repeat domain, L domain-like; Concanavalin A-like lectin/glucanase domain; Protein kinase-like domain;	R	KOG0619	FOG: Leucine rich repeat
A0A1U8DXD5	Extra-large guanine nucleotide-binding protein 2 OS=Capsicum annuum OX=4072 GN=T459_31775	T459_31775	103.61	4.6272	2.7	2	2	2	0.79	0.807	0.715	1.149	1.277	1.238	1.585	0.00069858	nucleus	GO:0007186 G-protein coupled receptor signaling pathway; GO:0050794 regulation of cellular process; GO:0044700 single organism signaling; GO:0051716 cellular response to stimulus; GO:0007165 signal transduction; GO:0050789 regulation of biological process; GO:0007154 cell communication; GO:0044699 single-organism process; GO:0023052 signaling; GO:0050896 response to stimulus; GO:0009987 cellular …		GO:1901265 nucleoside phosphate binding; GO:0044877 macromolecular complex binding; GO:0031683 G-protein beta/gamma-subunit complex binding; GO:0016817 hydrolase activity, acting on acid anhydrides; GO:0016787 hydrolase activity; GO:0005515 protein binding; GO:0000166 nucleotide binding; GO:0017111 nucleoside-triphosphatase activity; GO:0004871 signal transducer activity; GO:1901363 heterocyclic …				IPR027417; IPR011025;	P-loop containing nucleoside triphosphate hydrolase; G protein alpha subunit, helical insertion;	DT	KOG0082	G-protein alpha subunit (small G protein superfamily)
A0A1U8DXH7	Pectin acetylesterase OS=Capsicum annuum OX=4072 GN=T459_33597	T459_33597	46.651	33.218	24.3	8	13	8	1.008	1.025	1.024	0.966	0.948	1.01	0.956	0.083683	extracellular			GO:0016787 hydrolase activity; GO:0003824 catalytic activity;						M	KOG4287	Pectin acetylesterase and similar proteins
A0A1U8DXI7	Uncharacterized protein OS=Capsicum annuum OX=4072 GN=T459_02612	T459_02612	28.633	1.6389	3.6	1	1	1	0.976	0.948	0.924	1.038	0.987	1.13	1.108	0.076318	cytoplasm	GO:0008152 metabolic process;		GO:0016741 transferase activity, transferring one-carbon groups; GO:0008168 methyltransferase activity; GO:0003824 catalytic activity; GO:0016740 transferase activity;				IPR029063; IPR013216;	S-adenosyl-L-methionine-dependent methyltransferase; Methyltransferase type 11;	E	KOG2352	Predicted spermine/spermidine synthase
A0A1U8DXM3	PHD finger protein ALFIN-LIKE 8 OS=Capsicum annuum OX=4072 GN=T459_33936	T459_33936	27.97	2.666	7.3	2	3	1	0.992	1.025	0.961	1.054	0.958	1.02	1.018	0.62964	chloroplast	GO:0050794 regulation of cellular process; GO:0010468 regulation of gene expression; GO:0006355 regulation of transcription, DNA-templated; GO:0031326 regulation of cellular biosynthetic process; GO:0080090 regulation of primary metabolic process; GO:0060255 regulation of macromolecule metabolic process; GO:0019219 regulation of nucleobase-containing compound metabolic process; GO:0010556 regulat…		GO:0042393 histone binding; GO:0046914 transition metal ion binding; GO:0005488 binding; GO:0043167 ion binding; GO:0046872 metal ion binding; GO:0043169 cation binding; GO:0005515 protein binding; GO:0008270 zinc ion binding;				IPR013083; IPR001965; IPR011011; IPR019787;	Zinc finger, RING/FYVE/PHD-type; Zinc finger, PHD-type; Zinc finger, FYVE/PHD-type; Zinc finger, PHD-finger;	R	KOG1632	Uncharacterized PHD Zn-finger protein
A0A1U8DXQ9	Purple acid phosphatase OS=Capsicum annuum OX=4072 GN=T459_01382	T459_01382	53.745	29.981	10.9	4	7	4	0.977	1.066	0.941	0.978	0.982	1.055	1.01	0.81486	vacuolar membrane			GO:0003993 acid phosphatase activity; GO:0042578 phosphoric ester hydrolase activity; GO:0003824 catalytic activity; GO:0016791 phosphatase activity; GO:0005488 binding; GO:0016788 hydrolase activity, acting on ester bonds; GO:0043167 ion binding; GO:0043169 cation binding; GO:0046872 metal ion binding; GO:0016787 hydrolase activity;	K22390			IPR029052; IPR015914; IPR004843; IPR025733; IPR008963;	Metallo-dependent phosphatase-like; Purple acid phosphatase, N-terminal; Calcineurin-like phosphoesterase domain, ApaH type; Iron/zinc purple acid phosphatase-like C-terminal domain; Purple acid phosphatase-like, N-terminal;	G	KOG1378	Purple acid phosphatase
A0A1U8DXT0	Uncharacterized protein OS=Capsicum annuum OX=4072 GN=T459_01401	T459_01401	41.204	4.8491	9.5	3	4	3	0.973	0.926	0.913	1.088	1.039	1.062	1.134	0.0057827	mitochondria			GO:0005515 protein binding; GO:0005488 binding;				IPR001452; IPR027267;	SH3 domain; Arfaptin homology (AH) domain/BAR domain;
A0A1U8DXV8	Peptidyl-prolyl cis-trans isomerase OS=Capsicum annuum OX=4072 GN=T459_33740	T459_33740	12.896	15.434	27.1	3	4	3	0.952	0.989	0.977	0.99	1.07	0.995	1.047	0.174402	cytoplasm			GO:0016853 isomerase activity; GO:0003824 catalytic activity;	K09578			IPR000297;	Peptidyl-prolyl cis-trans isomerase, PpiC-type;	O	KOG3259	Peptidyl-prolyl cis-trans isomerase
A0A1U8DY12	"Translocase of chloroplast, chloroplastic OS=Capsicum annuum OX=4072 GN=T459_32110"	T459_32110	148.91	30.385	8.8	11	12	11	0.99	1.026	0.977	1.074	1.002	1.062	1.048	0.144535	nucleus			GO:1901265 nucleoside phosphate binding; GO:0001882 nucleoside binding; GO:0043167 ion binding; GO:0016817 hydrolase activity, acting on acid anhydrides; GO:0016787 hydrolase activity; GO:0000166 nucleotide binding; GO:0097159 organic cyclic compound binding; GO:1901363 heterocyclic compound binding; GO:0032549 ribonucleoside binding; GO:0097367 carbohydrate derivative binding; GO:0003824 catalyt…				IPR006703; IPR024283; IPR027417;	AIG1-type guanine nucleotide-binding (G) domain; Translocase of chloroplast 159/132, membrane anchor domain; P-loop containing nucleoside triphosphate hydrolase;
A0A1U8DY17	Uncharacterized protein OS=Capsicum annuum OX=4072 GN=T459_32113	T459_32113	36.237	18.448	18.7	4	5	4	1.036	1.021	1.013	0.996	0.984	0.953	0.955	0.035838	nucleus	GO:0044699 single-organism process; GO:0008152 metabolic process; GO:0044238 primary metabolic process; GO:0044710 single-organism metabolic process; GO:0006629 lipid metabolic process; GO:0071704 organic substance metabolic process;		GO:0008081 phosphoric diester hydrolase activity; GO:0016787 hydrolase activity; GO:0003824 catalytic activity; GO:0042578 phosphoric ester hydrolase activity; GO:0016788 hydrolase activity, acting on ester bonds;				IPR000909; IPR017946;	Phosphatidylinositol-specific phospholipase C, X domain; PLC-like phosphodiesterase, TIM beta/alpha-barrel domain;	T	KOG4306	Glycosylphosphatidylinositol-specific phospholipase C
A0A1U8DY44	Uncharacterized protein OS=Capsicum annuum OX=4072 GN=T459_32134	T459_32134	48.346	47.73	23.6	8	8	8	0.569	0.586	0.604	1.398	1.393	1.406	2.386	0.00040092	cytoplasm				K19366	SPG20; spartin	sly04144 Endocytosis - Solanum lycopersicum (tomato);	IPR009686;	Senescence/spartin-associated;
A0A1U8DY46	Synaptotagmin-1 OS=Capsicum annuum OX=4072 GN=T459_32140	T459_32140	61.349	50.294	21.7	10	15	10	0.967	1.002	0.992	0.997	1.029	0.993	1.02	0.27804	cytoplasm			GO:0008289 lipid binding; GO:0005515 protein binding; GO:0005488 binding;				IPR031468; IPR000008;	Synaptotagmin-like mitochondrial-lipid-binding domain; C2 domain;	R	KOG1012	Ca2+-dependent lipid-binding protein CLB1/vesicle protein vp115/Granuphilin A, contains C2 domain
A0A1U8DY53	Putative L-ascorbate peroxidase 3 OS=Capsicum annuum OX=4072 GN=T459_32139	T459_32139	31.614	105.63	49.5	14	32	12	1.008	0.975	0.989	0.99	1.028	1.028	1.025	0.196175	cytoplasm	GO:0008152 metabolic process; GO:0006950 response to stress; GO:0055114 oxidation-reduction process; GO:0044710 single-organism metabolic process; GO:0006979 response to oxidative stress; GO:0044699 single-organism process; GO:0050896 response to stimulus;		GO:0097159 organic cyclic compound binding; GO:1901363 heterocyclic compound binding; GO:0020037 heme binding; GO:0003824 catalytic activity; GO:0005488 binding; GO:0016209 antioxidant activity; GO:0004601 peroxidase activity; GO:0046906 tetrapyrrole binding; GO:0016491 oxidoreductase activity; GO:0016684 oxidoreductase activity, acting on peroxide as acceptor;	K00434	E1.11.1.11; L-ascorbate peroxidase [EC:1.11.1.11]	sly00053 Ascorbate and aldarate metabolism - Solanum lycopersicum (tomato); sly00480 Glutathione metabolism - Solanum lycopersicum (tomato);	IPR002016;	Haem peroxidase, plant/fungal/bacterial;
A0A1U8DY73	Uncharacterized protein OS=Capsicum annuum OX=4072 GN=T459_34255	T459_34255	57.686	10.252	9.7	5	5	5	1.056	1.076	1.082	0.932	0.934	0.933	0.871	0.0028413	chloroplast
A0A1U8DY77	Transportin-1 OS=Capsicum annuum OX=4072 GN=T459_32170	T459_32170	99.123	10.652	7	5	6	5	0.98	0.951	1.017	1.051	1.005	1.024	1.045	0.132462	plasma membrane	GO:0045184 establishment of protein localization; GO:0006810 transport; GO:0046907 intracellular transport; GO:0070727 cellular macromolecule localization; GO:0051649 establishment of localization in cell; GO:0006886 intracellular protein transport; GO:0071702 organic substance transport; GO:0008104 protein localization; GO:0033036 macromolecule localization; GO:0034613 cellular protein localizat…		GO:0031267 small GTPase binding; GO:0017016 Ras GTPase binding; GO:0005488 binding; GO:0005515 protein binding; GO:0008536 Ran GTPase binding; GO:0051020 GTPase binding; GO:0019899 enzyme binding;	K18752			IPR001494; IPR011989; IPR016024;	Importin-beta, N-terminal domain; Armadillo-like helical; Armadillo-type fold;	YU	KOG2023	Nuclear transport receptor Karyopherin-beta2/Transportin (importin beta superfamily)
A0A1U8DY78	Putative 26S proteasome non-ATPase regulatory subunit 3 OS=Capsicum annuum OX=4072 GN=T459_32162	T459_32162	55.671	57.498	26.9	11	14	11	0.96	0.992	0.964	1.067	1.001	1.063	1.074	0.037501	nucleus	GO:0050789 regulation of biological process; GO:0080090 regulation of primary metabolic process; GO:0060255 regulation of macromolecule metabolic process; GO:0051246 regulation of protein metabolic process; GO:0009894 regulation of catabolic process; GO:0019222 regulation of metabolic process; GO:0042176 regulation of protein catabolic process; GO:0065007 biological regulation;	GO:1902494 catalytic complex; GO:0000502 proteasome complex; GO:0044464 cell part; GO:0005622 intracellular; GO:0032991 macromolecular complex; GO:0044424 intracellular part; GO:1905368 peptidase complex; GO:0005623 cell; GO:0043234 protein complex; GO:1905369 endopeptidase complex;	GO:0005515 protein binding; GO:0030234 enzyme regulator activity; GO:0098772 molecular function regulator; GO:0005488 binding;	K03033	PSMD3; 26S proteasome regulatory subunit N3	sly03050 Proteasome - Solanum lycopersicum (tomato);	IPR000717; IPR011991; IPR011990; IPR013586;	Proteasome component (PCI) domain; Winged helix-turn-helix DNA-binding domain; Tetratricopeptide-like helical domain; 26S proteasome regulatory subunit, C-terminal;	O	KOG2581	26S proteasome regulatory complex, subunit RPN3/PSMD3
A0A1U8DYA0	L-ascorbate oxidase-like protein OS=Capsicum annuum OX=4072 GN=T459_33571	T459_33571	60.607	3.3166	7.4	4	4	2	0.954	1.017	0.9	1.052	1.034	1.046	1.091	0.131796	chloroplast	GO:0044699 single-organism process; GO:0008152 metabolic process; GO:0055114 oxidation-reduction process; GO:0044710 single-organism metabolic process;		GO:0046914 transition metal ion binding; GO:0003824 catalytic activity; GO:0005488 binding; GO:0043167 ion binding; GO:0046872 metal ion binding; GO:0043169 cation binding; GO:0005507 copper ion binding; GO:0016491 oxidoreductase activity;				IPR034275; IPR011706; IPR011707; IPR008972; IPR001117;	Ascorbate oxidase homologue, third cupredoxin domain; Multicopper oxidase, type 2; Multicopper oxidase, type 3; Cupredoxin; Multicopper oxidase, type 1;	Q	KOG1263	Multicopper oxidases
A0A1U8DYD0	SEC1 family transport protein SLY1 OS=Capsicum annuum OX=4072 GN=T459_33543	T459_33543	69.126	3.3823	3.5	2	3	2	0.984	0.926	0.962	1.081	0.991	1.059	1.09	0.053221	chloroplast	GO:0006904 vesicle docking involved in exocytosis; GO:0016192 vesicle-mediated transport; GO:0044763 single-organism cellular process; GO:0044699 single-organism process; GO:0048278 vesicle docking; GO:0022406 membrane docking; GO:0051234 establishment of localization; GO:0006810 transport; GO:1902578 single-organism localization; GO:0032940 secretion by cell; GO:0051179 localization; GO:0009987 …			K19998			IPR027482;	Sec1-like, domain 2;	U	KOG1301	Vesicle trafficking protein Sly1 (Sec1 family)
A0A1U8DYD4	Uncharacterized protein OS=Capsicum annuum OX=4072 GN=T459_33556	T459_33556	38.797	2.4788	3.9	1	2	1	0.984	0.99	0.887	1.03	0.972	1.143	1.099	0.189581	extracellular							IPR018392;	LysM domain;
A0A1U8DYD9	Putative L-cysteine desulfhydrase 2 OS=Capsicum annuum OX=4072 GN=T459_02448	T459_02448	50.302	10.309	13	4	4	4	1.008	1.029	1.086	1.089	0.839	0.971	0.928	0.36892	cytoskeleton			GO:0003824 catalytic activity;	K22207	LCD; L-cysteine desulfhydrase [EC:4.4.1.28]	sly00270 Cysteine and methionine metabolism - Solanum lycopersicum (tomato); sly01100 Metabolic pathways - Solanum lycopersicum (tomato);	IPR015424; IPR000192; IPR015421;	Pyridoxal phosphate-dependent transferase; Aminotransferase class V domain; Pyridoxal phosphate-dependent transferase, major region, subdomain 1;	E	KOG1549	Cysteine desulfurase NFS1
A0A1U8DYE9	Protein transport protein SEC23 OS=Capsicum annuum OX=4072 GN=T459_02449	T459_02449	95.249	17.377	4.8	3	3	3	0.971	1.029	0.991	1.157	0.868	1.002	1.012	0.95238	chloroplast	GO:0045184 establishment of protein localization; GO:0006810 transport; GO:0046907 intracellular transport; GO:0070727 cellular macromolecule localization; GO:0051649 establishment of localization in cell; GO:0016192 vesicle-mediated transport; GO:0006886 intracellular protein transport; GO:0048193 Golgi vesicle transport; GO:0071702 organic substance transport; GO:0008104 protein localization; G…	GO:0016020 membrane; GO:0030658 transport vesicle membrane; GO:0031410 cytoplasmic vesicle; GO:0031090 organelle membrane; GO:0098796 membrane protein complex; GO:0005737 cytoplasm; GO:0031982 vesicle; GO:0044433 cytoplasmic vesicle part; GO:0032991 macromolecular complex; GO:0044424 intracellular part; GO:0030120 vesicle coat; GO:0005623 cell; GO:0044422 organelle part; GO:0030662 coated vesicle…	GO:0043169 cation binding; GO:0046872 metal ion binding; GO:0008270 zinc ion binding; GO:0046914 transition metal ion binding; GO:0005488 binding; GO:0043167 ion binding;				IPR006900; IPR012990; IPR006896; IPR029006; IPR006895; IPR002035; IPR007123;	Sec23/Sec24, helical domain; Sec23/Sec24 beta-sandwich; Sec23/Sec24, trunk domain; ADF-H/Gelsolin-like domain; Zinc finger, Sec23/Sec24-type; von Willebrand factor, type A; Gelsolin-like domain;	U	KOG1986	Vesicle coat complex COPII, subunit SEC23
A0A1U8DYF4	Uncharacterized protein OS=Capsicum annuum OX=4072 GN=T459_34618	T459_34618	25.8	5.6079	13.8	3	4	3	1.02	1.002	0.988	1.025	0.987	0.977	0.993	0.70072	nucleus
A0A1U8DYH7	DEAD-box ATP-dependent RNA helicase 24 OS=Capsicum annuum OX=4072 GN=T459_02456	T459_02456	84.313	3.11	4.5	3	3	3									cytoplasm			GO:0005524 ATP binding; GO:1901265 nucleoside phosphate binding; GO:0001882 nucleoside binding; GO:0043167 ion binding; GO:0000166 nucleotide binding; GO:0097159 organic cyclic compound binding; GO:1901363 heterocyclic compound binding; GO:0032549 ribonucleoside binding; GO:0097367 carbohydrate derivative binding; GO:0032553 ribonucleotide binding; GO:0005488 binding; GO:0003676 nucleic acid bind…	K12835	DDX42; ATP-dependent RNA helicase DDX42 [EC:3.6.4.13]	sly03040 Spliceosome - Solanum lycopersicum (tomato);	IPR011545; IPR014014; IPR014001; IPR027417; IPR001650;	DEAD/DEAH box helicase domain; RNA helicase, DEAD-box type, Q motif; Helicase superfamily 1/2, ATP-binding domain; P-loop containing nucleoside triphosphate hydrolase; Helicase, C-terminal;	A	KOG0339	ATP-dependent RNA helicase
A0A1U8DYI8	Calcium-dependent protein kinase 5 OS=Capsicum annuum OX=4072 GN=T459_34413	T459_34413	60.441	30.292	10.2	4	5	2	1.177	1.156	1.127	0.825	0.943	0.788	0.739	0.0052411	mitochondria	GO:0016310 phosphorylation; GO:0044267 cellular protein metabolic process; GO:0044238 primary metabolic process; GO:0044237 cellular metabolic process; GO:0006796 phosphate-containing compound metabolic process; GO:0071704 organic substance metabolic process; GO:0008152 metabolic process; GO:0006468 protein phosphorylation; GO:0006793 phosphorus metabolic process; GO:0044260 cellular macromolecul…		GO:0005524 ATP binding; GO:1901265 nucleoside phosphate binding; GO:0016773 phosphotransferase activity, alcohol group as acceptor; GO:0001882 nucleoside binding; GO:0043167 ion binding; GO:0004672 protein kinase activity; GO:0000166 nucleotide binding; GO:0097159 organic cyclic compound binding; GO:1901363 heterocyclic compound binding; GO:0032549 ribonucleoside binding; GO:0097367 carbohydrate …	K13412	CPK; calcium-dependent protein kinase [EC:2.7.11.1]	sly04626 Plant-pathogen interaction - Solanum lycopersicum (tomato);	IPR000719; IPR002048; IPR011992; IPR011009;	Protein kinase domain; EF-hand domain; EF-hand domain pair; Protein kinase-like domain;	T	KOG0032	Ca2+/calmodulin-dependent protein kinase, EF-Hand protein superfamily
A0A1U8DYM0	Chaperone protein DnaJ OS=Capsicum annuum OX=4072 GN=T459_32015	T459_32015	48.202	78.484	30	14	26	14	0.988	0.981	0.992	1.013	0.978	1.002	1.011	0.38338	chloroplast	GO:0006457 protein folding; GO:0050896 response to stimulus; GO:0006950 response to stress; GO:0009987 cellular process; GO:0009408 response to heat; GO:0009628 response to abiotic stimulus; GO:0009266 response to temperature stimulus;		GO:0005524 ATP binding; GO:0031072 heat shock protein binding; GO:1901265 nucleoside phosphate binding; GO:0001882 nucleoside binding; GO:0043167 ion binding; GO:0005515 protein binding; GO:0000166 nucleotide binding; GO:0097159 organic cyclic compound binding; GO:1901363 heterocyclic compound binding; GO:0032549 ribonucleoside binding; GO:0097367 carbohydrate derivative binding; GO:0032553 ribon…	K03686			IPR008971; IPR002939; IPR001623; IPR001305;	HSP40/DnaJ peptide-binding; Chaperone DnaJ, C-terminal; DnaJ domain; Heat shock protein DnaJ, cysteine-rich domain;	O	KOG0715	Molecular chaperone (DnaJ superfamily)
A0A1U8DYR9	"Heme oxygenase 1, chloroplastic OS=Capsicum annuum OX=4072 GN=T459_24567"	T459_24567	40.953	22.052	15.3	6	10	6	1.026	0.979	0.965	1.019	1.008	1.044	1.034	0.187578	chloroplast	GO:0006725 cellular aromatic compound metabolic process; GO:0044699 single-organism process; GO:0042168 heme metabolic process; GO:0044237 cellular metabolic process; GO:0071704 organic substance metabolic process; GO:0044270 cellular nitrogen compound catabolic process; GO:0008152 metabolic process; GO:0006778 porphyrin-containing compound metabolic process; GO:0051187 cofactor catabolic process…		GO:0016705 oxidoreductase activity, acting on paired donors, with incorporation or reduction of molecular oxygen; GO:0004392 heme oxygenase (decyclizing) activity; GO:0003824 catalytic activity; GO:0016491 oxidoreductase activity;	K21480	HO; heme oxygenase (biliverdin-producing, ferredoxin) [EC:1.14.15.20]	sly00860 Porphyrin and chlorophyll metabolism - Solanum lycopersicum (tomato); sly01110 Biosynthesis of secondary metabolites - Solanum lycopersicum (tomato); sly01100 Metabolic pathways - Solanum lycopersicum (tomato);	IPR016084;	Haem oxygenase-like, multi-helical;	P	KOG4480	Heme oxygenase
A0A1U8DYU1	Repetitive proline-rich cell wall protein 2 OS=Capsicum annuum OX=4072 GN=T459_24554	T459_24554	25.843	2.2474	3.6	1	5	1	1.072	1.063	1.09	0.929	0.909	0.957	0.867	0.00099948	extracellular							IPR016140; IPR027923;	Bifunctional inhibitor/plant lipid transfer protein/seed storage helical domain; Hydrophobic seed protein;
A0A1U8DYV0	"Malate dehydrogenase, glyoxysomal OS=Capsicum annuum OX=4072 GN=T459_31928"	T459_31928	37.844	82.171	28.8	12	32	10	1.005	1.029	0.999	0.992	0.987	1.006	0.984	0.21076	cytoplasm	GO:0043648 dicarboxylic acid metabolic process; GO:0055114 oxidation-reduction process; GO:0044281 small molecule metabolic process; GO:0044763 single-organism cellular process; GO:0044699 single-organism process; GO:0005975 carbohydrate metabolic process; GO:0044238 primary metabolic process; GO:0044237 cellular metabolic process; GO:0071704 organic substance metabolic process; GO:0008152 metabo…		GO:0016614 oxidoreductase activity, acting on CH-OH group of donors; GO:0016616 oxidoreductase activity, acting on the CH-OH group of donors, NAD or NADP as acceptor; GO:0016615 malate dehydrogenase activity; GO:0003824 catalytic activity; GO:0030060 L-malate dehydrogenase activity; GO:0016491 oxidoreductase activity;	K00026	MDH2; malate dehydrogenase [EC:1.1.1.37]	sly00620 Pyruvate metabolism - Solanum lycopersicum (tomato); sly01110 Biosynthesis of secondary metabolites - Solanum lycopersicum (tomato); sly00630 Glyoxylate and dicarboxylate metabolism - Solanum lycopersicum (tomato); sly00270 Cysteine and methionine metabolism - Solanum lycopersicum (tomato); sly01200 Carbon metabolism - Solanum lycopersicum (tomato); sly00710 Carbon fixation in photosynth…	IPR022383; IPR016040; IPR001236; IPR015955;	Lactate/malate dehydrogenase, C-terminal; NAD(P)-binding domain; Lactate/malate dehydrogenase, N-terminal; Lactate dehydrogenase/glycoside hydrolase, family 4, C-terminal;	C	KOG1494	NAD-dependent malate dehydrogenase
A0A1U8DYX6	Uncharacterized protein OS=Capsicum annuum OX=4072 GN=T459_31911	T459_31911	53.802	53.269	19.3	7	10	7	1.011	0.981	1.024	1.008	1.028	0.973	0.998	0.91172	nucleus			GO:0005515 protein binding; GO:0005488 binding;				IPR000270;	PB1 domain;
A0A1U8DZ46	BTB/POZ domain-containing protein NPY3 OS=Capsicum annuum OX=4072 GN=T459_32233	T459_32233	68.995	4.7311	5.8	3	4	3	1.014	1.014	1.014	0.999	0.976	0.991	0.975	0.065558	nucleus			GO:0005515 protein binding; GO:0005488 binding;				IPR011333; IPR027356; IPR000210;	SKP1/BTB/POZ domain; NPH3 domain; BTB/POZ domain;
A0A1U8DZ76	Uncharacterized protein OS=Capsicum annuum OX=4072 GN=T459_24389	T459_24389	21.208	21.448	19.6	3	5	3	0.905	0.944	0.882	1.06	1.121	1.11	1.205	0.0020752	cytoplasm				K09705			IPR009327; IPR011051; IPR014710;	Cupin domain of unknown function DUF985; RmlC-like cupin domain; RmlC-like jelly roll fold;
A0A1U8DZ77	Uncharacterized protein OS=Capsicum annuum OX=4072 GN=T459_32215	T459_32215	16.027	4.1907	16.4	2	2	2									chloroplast			GO:0005515 protein binding; GO:0005488 binding;				IPR003121; IPR019835;	SWIB/MDM2 domain; SWIB domain;	K	KOG1946	RNA polymerase I transcription factor UAF
A0A1U8DZ99	Charged multivesicular body protein 2a OS=Capsicum annuum OX=4072 GN=T459_24369	T459_24369	25.034	1.1873	4.5	1	1	1	0.746	0.729	0.607	1.097	1.454	1.324	1.861	0.0042169	cytoplasm	GO:0006810 transport; GO:0051179 localization; GO:0007034 vacuolar transport; GO:0051234 establishment of localization;			K12191	CHMP2A; charged multivesicular body protein 2A	sly04144 Endocytosis - Solanum lycopersicum (tomato);			U	KOG3230	Vacuolar assembly/sorting protein DID4
A0A1U8DZA9	40S ribosomal protein S16 OS=Capsicum annuum OX=4072 GN=T459_02663	T459_02663	17.056	73.021	62.7	10	22	10	0.976	1.06	0.977	1.023	0.979	1.017	1.002	0.93752	cytoplasm	GO:0006518 peptide metabolic process; GO:0043043 peptide biosynthetic process; GO:0044267 cellular protein metabolic process; GO:0006807 nitrogen compound metabolic process; GO:0009058 biosynthetic process; GO:0043603 cellular amide metabolic process; GO:0044238 primary metabolic process; GO:1901566 organonitrogen compound biosynthetic process; GO:1901576 organic substance biosynthetic process; G…	GO:0005840 ribosome; GO:0043226 organelle; GO:0043229 intracellular organelle; GO:0043232 intracellular non-membrane-bounded organelle; GO:0044464 cell part; GO:0005622 intracellular; GO:0005737 cytoplasm; GO:0032991 macromolecular complex; GO:0044424 intracellular part; GO:1990904 ribonucleoprotein complex; GO:0005623 cell; GO:0030529 intracellular ribonucleoprotein complex; GO:0044444 cytoplasm…	GO:0003735 structural constituent of ribosome; GO:0005198 structural molecule activity;	K02960	RP-S16e; small subunit ribosomal protein S16e	sly03010 Ribosome - Solanum lycopersicum (tomato);	IPR020568; IPR014721;	Ribosomal protein S5 domain 2-type fold; Ribosomal protein S5 domain 2-type fold, subgroup;	J	KOG1753	40S ribosomal protein S16
A0A1U8DZC1	Translation machinery-associated protein 22 OS=Capsicum annuum OX=4072 GN=T459_24343	T459_24343	20.868	11.536	14.3	2	2	2	1.036	1.133	1.087	0.951	0.938	0.873	0.848	0.0113182	nucleus	GO:0006518 peptide metabolic process; GO:0043043 peptide biosynthetic process; GO:0044267 cellular protein metabolic process; GO:0006807 nitrogen compound metabolic process; GO:0009058 biosynthetic process; GO:0043603 cellular amide metabolic process; GO:0044238 primary metabolic process; GO:1901566 organonitrogen compound biosynthetic process; GO:0044237 cellular metabolic process; GO:1901576 or…		GO:0097159 organic cyclic compound binding; GO:1901363 heterocyclic compound binding; GO:0003723 RNA binding; GO:0008135 translation factor activity, RNA binding; GO:0005488 binding; GO:0003676 nucleic acid binding; GO:0003743 translation initiation factor activity;				IPR001950;	SUI1 domain;	R	KOG3239	Density-regulated protein related to translation initiation factor 1 (eIF-1/SUI1)
A0A1U8DZD5	Uncharacterized protein OS=Capsicum annuum OX=4072 GN=T459_33518	T459_33518	30.477	19.882	13.6	4	8	4	1.095	1.087	1.025	1.008	0.951	0.914	0.896	0.035277	cytoplasm	GO:1901606 alpha-amino acid catabolic process; GO:0006725 cellular aromatic compound metabolic process; GO:0044699 single-organism process; GO:0044237 cellular metabolic process; GO:0071704 organic substance metabolic process; GO:0006576 cellular biogenic amine metabolic process; GO:0044270 cellular nitrogen compound catabolic process; GO:0008152 metabolic process; GO:0006520 cellular amino acid …		GO:0016787 hydrolase activity; GO:0016811 hydrolase activity, acting on carbon-nitrogen (but not peptide) bonds, in linear amides; GO:0004061 arylformamidase activity; GO:0003824 catalytic activity; GO:0016810 hydrolase activity, acting on carbon-nitrogen (but not peptide) bonds;
A0A1U8DZD6	IAA-amino acid hydrolase ILR1-like 1 OS=Capsicum annuum OX=4072 GN=T459_24335	T459_24335	48.942	13.196	7.9	3	4	3	1.01	1.009	1.071	0.98	0.972	0.968	0.945	0.0486	extracellular	GO:0008152 metabolic process;		GO:0016787 hydrolase activity; GO:0003824 catalytic activity;	K14664			IPR011650;	Peptidase M20, dimerisation domain;
A0A1U8DZF4	Polyadenylate-binding protein OS=Capsicum annuum OX=4072 GN=T459_33534	T459_33534	70.51	201.26	38	19	33	17	1.017	1.044	0.998	0.976	1.022	1.006	0.982	0.3888	nucleus			GO:0097159 organic cyclic compound binding; GO:1901363 heterocyclic compound binding; GO:0003723 RNA binding; GO:1901265 nucleoside phosphate binding; GO:0005488 binding; GO:0003676 nucleic acid binding; GO:0000166 nucleotide binding; GO:0036094 small molecule binding;	K13126	PABPC; polyadenylate-binding protein	sly03018 RNA degradation - Solanum lycopersicum (tomato); sly03015 mRNA surveillance pathway - Solanum lycopersicum (tomato); sly03013 RNA transport - Solanum lycopersicum (tomato);	IPR002004; IPR000504; IPR012677; IPR003954;	Polyadenylate-binding protein/Hyperplastic disc protein; RNA recognition motif domain; Nucleotide-binding alpha-beta plait domain; RNA recognition motif domain, eukaryote;	AJ	KOG0123	Polyadenylate-binding protein (RRM superfamily)
A0A1U8DZI7	"Methylcrotonoyl-CoA carboxylase beta chain, mitochondrial OS=Capsicum annuum OX=4072 GN=T459_33045"	T459_33045	62.144	104.83	38.1	18	33	18	0.949	1.009	0.972	1.026	1.03	0.999	1.043	0.106823	mitochondria			GO:0003824 catalytic activity; GO:0016874 ligase activity;	K01969	E6.4.1.4B; 3-methylcrotonyl-CoA carboxylase beta subunit [EC:6.4.1.4]	sly00280 Valine, leucine and isoleucine degradation - Solanum lycopersicum (tomato); sly01100 Metabolic pathways - Solanum lycopersicum (tomato);	IPR011762; IPR000022; IPR029045; IPR011763;	Acetyl-coenzyme A carboxyltransferase, N-terminal; Carboxyl transferase; ClpP/crotonase-like domain; Acetyl-coenzyme A carboxyltransferase, C-terminal;	EI	KOG0540	3-Methylcrotonyl-CoA carboxylase, non-biotin containing subunit/Acetyl-CoA carboxylase carboxyl transferase, subunit beta
A0A1U8DZK8	Protein CYPRO4 OS=Capsicum annuum OX=4072 GN=T459_33022	T459_33022	71.364	19.962	12.6	7	7	7	0.89	0.936	0.956	1.112	1.025	1.083	1.157	0.010337	nucleus			GO:0005515 protein binding; GO:0005488 binding;				IPR017986; IPR015943;	WD40-repeat-containing domain; WD40/YVTN repeat-like-containing domain;	U	KOG2395	Protein involved in vacuole import and degradation
A0A1U8DZL0	Beta-D-xylosidase 1 OS=Capsicum annuum OX=4072 GN=T459_01598	T459_01598	83.523	19.071	9.2	6	8	5	1.029	1.029	1.039	1.001	0.962	0.95	0.941	0.0187413	chloroplast	GO:0008152 metabolic process; GO:0005975 carbohydrate metabolic process; GO:0044238 primary metabolic process; GO:0071704 organic substance metabolic process;		GO:0004553 hydrolase activity, hydrolyzing O-glycosyl compounds; GO:0016787 hydrolase activity; GO:0003824 catalytic activity; GO:0016798 hydrolase activity, acting on glycosyl bonds;				IPR001764; IPR002772; IPR026891; IPR017853;	Glycoside hydrolase, family 3, N-terminal; Glycoside hydrolase family 3 C-terminal domain; Fibronectin type III-like domain; Glycoside hydrolase superfamily;
A0A1U8DZM1	Peroxisomal adenine nucleotide carrier 1 OS=Capsicum annuum OX=4072 GN=T459_02830	T459_02830	35.423	3.3136	4.1	1	2	1	0.923	1.016	1.033	0.961	1.028	1.043	1.02	0.6589	nucleus							IPR023395;	Mitochondrial carrier domain;	C	KOG0769	Predicted mitochondrial carrier protein
A0A1U8DZQ5	Peptidyl-prolyl cis-trans isomerase D OS=Capsicum annuum OX=4072 GN=T459_31717	T459_31717	40.254	5.2068	7.7	3	3	3									cytoplasm	GO:0044267 cellular protein metabolic process; GO:0044238 primary metabolic process; GO:0018208 peptidyl-proline modification; GO:0000413 protein peptidyl-prolyl isomerization; GO:0044237 cellular metabolic process; GO:0071704 organic substance metabolic process; GO:0006457 protein folding; GO:0018193 peptidyl-amino acid modification; GO:0008152 metabolic process; GO:0044260 cellular macromolecul…		GO:0003755 peptidyl-prolyl cis-trans isomerase activity; GO:0005515 protein binding; GO:0016853 isomerase activity; GO:0003824 catalytic activity; GO:0016859 cis-trans isomerase activity; GO:0005488 binding;	K05864			IPR002130; IPR011990; IPR029000; IPR013026;	Cyclophilin-type peptidyl-prolyl cis-trans isomerase domain; Tetratricopeptide-like helical domain; Cyclophilin-like domain; Tetratricopeptide repeat-containing domain;	O	KOG0546	HSP90 co-chaperone CPR7/Cyclophilin
A0A1U8DZQ7	Glucose-1-phosphate adenylyltransferase OS=Capsicum annuum OX=4072 GN=T459_02833	T459_02833	56.627	194.66	50	21	47	19	1.025	1.002	0.989	1.005	1	1.001	0.997	0.78952	chloroplast	GO:0016051 carbohydrate biosynthetic process; GO:0000271 polysaccharide biosynthetic process; GO:0044042 glucan metabolic process; GO:0044699 single-organism process; GO:0009058 biosynthetic process; GO:0006112 energy reserve metabolic process; GO:0044237 cellular metabolic process; GO:0044264 cellular polysaccharide metabolic process; GO:0071704 organic substance metabolic process; GO:0008152 me…		GO:0008878 glucose-1-phosphate adenylyltransferase activity; GO:0016779 nucleotidyltransferase activity; GO:0003824 catalytic activity; GO:0016740 transferase activity; GO:0016772 transferase activity, transferring phosphorus-containing groups; GO:0070566 adenylyltransferase activity;	K00975	glgC; glucose-1-phosphate adenylyltransferase [EC:2.7.7.27]	sly01110 Biosynthesis of secondary metabolites - Solanum lycopersicum (tomato); sly00500 Starch and sucrose metabolism - Solanum lycopersicum (tomato); sly01100 Metabolic pathways - Solanum lycopersicum (tomato); sly00520 Amino sugar and nucleotide sugar metabolism - Solanum lycopersicum (tomato);	IPR011004; IPR029044; IPR005835;	Trimeric LpxA-like; Nucleotide-diphospho-sugar transferases; Nucleotidyl transferase domain;	M	KOG1322	GDP-mannose pyrophosphorylase/mannose-1-phosphate guanylyltransferase
A0A1U8DZV9	9-divinyl ether synthase OS=Capsicum annuum OX=4072 GN=T459_31777	T459_31777	54.061	94.023	42.1	18	35	18	0.362	0.289	0.335	1.58	1.668	1.61	4.927	1.96677e-05	chloroplast	GO:0044699 single-organism process; GO:0008152 metabolic process; GO:0055114 oxidation-reduction process; GO:0044710 single-organism metabolic process;		GO:0097159 organic cyclic compound binding; GO:1901363 heterocyclic compound binding; GO:0020037 heme binding; GO:0005506 iron ion binding; GO:0046914 transition metal ion binding; GO:0003824 catalytic activity; GO:0005488 binding; GO:0043167 ion binding; GO:0043169 cation binding; GO:0046872 metal ion binding; GO:0016705 oxidoreductase activity, acting on paired donors, with incorporation or red…	K17874
A0A1U8E004	"NifU-like protein 1, chloroplastic OS=Capsicum annuum OX=4072 GN=T459_02742"	T459_02742	22.783	7.7562	14.8	2	2	2	0.981	0.942	0.948	1.052	1.056	1.02	1.09	0.0068352	chloroplast	GO:0006790 sulfur compound metabolic process; GO:0044085 cellular component biogenesis; GO:0051188 cofactor biosynthetic process; GO:0016043 cellular component organization; GO:0008152 metabolic process; GO:0031163 metallo-sulfur cluster assembly; GO:0022607 cellular component assembly; GO:0016226 iron-sulfur cluster assembly; GO:0009058 biosynthetic process; GO:0009987 cellular process; GO:00442…		GO:0005506 iron ion binding; GO:0046914 transition metal ion binding; GO:0051536 iron-sulfur cluster binding; GO:0005488 binding; GO:0043167 ion binding; GO:0046872 metal ion binding; GO:0043169 cation binding; GO:0051540 metal cluster binding;	K22074			IPR001075;	NIF system FeS cluster assembly, NifU, C-terminal;	O	KOG2358	NifU-like domain-containing proteins
A0A1U8E016	Uncharacterized protein OS=Capsicum annuum OX=4072 GN=T459_34044	T459_34044	19.496	14.879	20.9	3	6	3	0.91	1.072	0.771	1.087	1.175	0.978	1.177	0.195757	cytoplasm	GO:0006950 response to stress; GO:0050896 response to stimulus;						IPR006016; IPR014729;	UspA; Rossmann-like alpha/beta/alpha sandwich fold;
A0A1U8E037	26S protease regulatory subunit 10B OS=Capsicum annuum OX=4072 GN=T459_34208	T459_34208	44.699	81.422	43.2	16	24	15	1.005	1.01	1.026	1.015	0.973	0.97	0.973	0.154761	cytoplasm	GO:1901575 organic substance catabolic process; GO:0008152 metabolic process; GO:0030163 protein catabolic process; GO:0009057 macromolecule catabolic process; GO:0043170 macromolecule metabolic process; GO:0019538 protein metabolic process; GO:0044238 primary metabolic process; GO:0009056 catabolic process; GO:0071704 organic substance metabolic process;	GO:0044424 intracellular part; GO:0005623 cell; GO:0044464 cell part; GO:0005622 intracellular; GO:0005737 cytoplasm;	GO:0005524 ATP binding; GO:1901265 nucleoside phosphate binding; GO:0001882 nucleoside binding; GO:0043167 ion binding; GO:0016787 hydrolase activity; GO:0000166 nucleotide binding; GO:0097159 organic cyclic compound binding; GO:1901363 heterocyclic compound binding; GO:0032549 ribonucleoside binding; GO:0097367 carbohydrate derivative binding; GO:0003824 catalytic activity; GO:0032553 ribonucleo…	K03064	PSMC6; 26S proteasome regulatory subunit T4	sly03050 Proteasome - Solanum lycopersicum (tomato);	IPR003593; IPR003959; IPR027417;	AAA+ ATPase domain; ATPase, AAA-type, core; P-loop containing nucleoside triphosphate hydrolase;	O	KOG0651	26S proteasome regulatory complex, ATPase RPT4
A0A1U8E0D5	Nuclear transcription factor Y subunit C-9 OS=Capsicum annuum OX=4072 GN=T459_02846	T459_02846	28.442	4.8144	8.1	2	2	2	0.924	0.974	0.945	1.098	1.057	1.004	1.111	0.025176	nucleus			GO:0005515 protein binding; GO:0046982 protein heterodimerization activity; GO:0005488 binding; GO:0046983 protein dimerization activity;	K08066			IPR003958; IPR009072;	Transcription factor CBF/NF-Y/archaeal histone domain; Histone-fold;	K	KOG1657	CCAAT-binding factor, subunit C (HAP5)
A0A1U8E0Q9	Uncharacterized protein OS=Capsicum annuum OX=4072 GN=T459_32181	T459_32181	64.432	3.4201	4.6	2	2	2	1.34	0.925	0.88	0.598	1.096	1.146	0.903	0.64264	cytoplasm	GO:0016310 phosphorylation; GO:0044267 cellular protein metabolic process; GO:0044238 primary metabolic process; GO:0044237 cellular metabolic process; GO:0006796 phosphate-containing compound metabolic process; GO:0071704 organic substance metabolic process; GO:0008152 metabolic process; GO:0006468 protein phosphorylation; GO:0006793 phosphorus metabolic process; GO:0044260 cellular macromolecul…		GO:0016597 amino acid binding; GO:0005524 ATP binding; GO:1901265 nucleoside phosphate binding; GO:0016773 phosphotransferase activity, alcohol group as acceptor; GO:0001882 nucleoside binding; GO:0043167 ion binding; GO:0043177 organic acid binding; GO:0004672 protein kinase activity; GO:0000166 nucleotide binding; GO:0097159 organic cyclic compound binding; GO:1901363 heterocyclic compound bind…				IPR000719; IPR002912; IPR001245; IPR011009;	Protein kinase domain; ACT domain; Serine-threonine/tyrosine-protein kinase catalytic domain; Protein kinase-like domain;	T	KOG0192	Tyrosine kinase specific for activated (GTP-bound) p21cdc42Hs
A0A1U8E0S1	26S proteasome non-ATPase regulatory subunit 7 OS=Capsicum annuum OX=4072 GN=T459_21134	T459_21134	34.878	13.415	21	6	9	6	1.022	0.962	0.956	1.027	1.023	0.995	1.036	0.206	cytoplasm		GO:1902494 catalytic complex; GO:0000502 proteasome complex; GO:0022624 proteasome accessory complex; GO:0044464 cell part; GO:0005622 intracellular; GO:0005838 proteasome regulatory particle; GO:0032991 macromolecular complex; GO:0044424 intracellular part; GO:1905368 peptidase complex; GO:0005623 cell; GO:0043234 protein complex; GO:1905369 endopeptidase complex;	GO:0005515 protein binding; GO:0005488 binding;	K03038	PSMD7; 26S proteasome regulatory subunit N8	sly03050 Proteasome - Solanum lycopersicum (tomato);	IPR000555; IPR024969;	JAB1/MPN/MOV34 metalloenzyme domain; Rpn11/EIF3F, C-terminal;	O	KOG1556	26S proteasome regulatory complex, subunit RPN8/PSMD7
A0A1U8E0S7	"Pentatricopeptide repeat-containing protein, mitochondrial OS=Capsicum annuum OX=4072 GN=T459_33566"	T459_33566	50.158	7.4321	7.8	3	3	3									chloroplast									R	KOG4197	FOG: PPR repeat
A0A1U8E166	"Hydroxymethylglutaryl-CoA lyase, mitochondrial OS=Capsicum annuum OX=4072 GN=T459_02763"	T459_02763	45.332	1.6164	5.5	2	2	2	0.73	0.754	0.662	1.351	1.194	1.291	1.788	0.00039971	chloroplast,mitochondria			GO:0003824 catalytic activity;	K01640	E4.1.3.4; hydroxymethylglutaryl-CoA lyase [EC:4.1.3.4]	sly00650 Butanoate metabolism - Solanum lycopersicum (tomato); sly00072 Synthesis and degradation of ketone bodies - Solanum lycopersicum (tomato); sly00280 Valine, leucine and isoleucine degradation - Solanum lycopersicum (tomato); sly04146 Peroxisome - Solanum lycopersicum (tomato); sly01100 Metabolic pathways - Solanum lycopersicum (tomato);	IPR013785; IPR000891;	Aldolase-type TIM barrel; Pyruvate carboxyltransferase;	CE	KOG2368	Hydroxymethylglutaryl-CoA lyase
A0A1U8E1A1	Importin subunit alpha OS=Capsicum annuum OX=4072 GN=T459_21577	T459_21577	58.378	88.112	32.5	12	14	9	1.028	1.001	1.02	0.986	1	0.986	0.975	0.049884	nucleus	GO:0046907 intracellular transport; GO:0072594 establishment of protein localization to organelle; GO:0017038 protein import; GO:1902593 single-organism nuclear import; GO:0044699 single-organism process; GO:0051169 nuclear transport; GO:0071702 organic substance transport; GO:0015031 protein transport; GO:1902582 single-organism intracellular transport; GO:0051234 establishment of localization; …	GO:0043226 organelle; GO:0043231 intracellular membrane-bounded organelle; GO:0043229 intracellular organelle; GO:0005634 nucleus; GO:0044464 cell part; GO:0005622 intracellular; GO:0005737 cytoplasm; GO:0044424 intracellular part; GO:0043227 membrane-bounded organelle; GO:0005623 cell;	GO:0022892 substrate-specific transporter activity; GO:0005515 protein binding; GO:0008565 protein transporter activity; GO:0005488 binding; GO:0005215 transporter activity;				IPR002652; IPR011989; IPR016024;	Importin-alpha, importin-beta-binding domain; Armadillo-like helical; Armadillo-type fold;	U	KOG0166	Karyopherin (importin) alpha
A0A1U8E1D0	Transmembrane 9 superfamily member OS=Capsicum annuum OX=4072 GN=T459_24498	T459_24498	74.204	1.2332	3.8	3	3	1	1.041	0.907	1.141	0.953	0.942	1.024	0.945	0.5013	plasma membrane		GO:0031224 intrinsic component of membrane; GO:0016020 membrane; GO:0016021 integral component of membrane; GO:0044425 membrane part;							U	KOG1278	Endosomal membrane proteins, EMP70
A0A1U8E1D6	PHD finger-like domain-containing protein 5A OS=Capsicum annuum OX=4072 GN=T459_24501	T459_24501	12.414	1.5436	11.8	1	1	1	1.104	1.153	1.047	0.861	0.957	0.891	0.82	0.0089394	cytoplasm				K12834	PHF5A; PHD finger-like domain-containing protein 5A	sly03040 Spliceosome - Solanum lycopersicum (tomato);			S	KOG1705	Uncharacterized conserved protein, contains CXXC motifs
A0A1U8E1F5	Eukaryotic initiation factor 4A-2 OS=Capsicum annuum OX=4072 GN=T459_33298	T459_33298	46.969	2.5924	42.6	17	45	1									cytoplasm			GO:0005524 ATP binding; GO:1901265 nucleoside phosphate binding; GO:0001882 nucleoside binding; GO:0043167 ion binding; GO:0000166 nucleotide binding; GO:0097159 organic cyclic compound binding; GO:1901363 heterocyclic compound binding; GO:0032549 ribonucleoside binding; GO:0097367 carbohydrate derivative binding; GO:0032553 ribonucleotide binding; GO:0005488 binding; GO:0003676 nucleic acid bind…	K03257	EIF4A; translation initiation factor 4A	sly03013 RNA transport - Solanum lycopersicum (tomato);	IPR014014; IPR011545; IPR027417; IPR014001; IPR001650;	RNA helicase, DEAD-box type, Q motif; DEAD/DEAH box helicase domain; P-loop containing nucleoside triphosphate hydrolase; Helicase superfamily 1/2, ATP-binding domain; Helicase, C-terminal;	J	KOG0327	Translation initiation factor 4F, helicase subunit (eIF-4A) and related helicases
A0A1U8E1G8	"CBS domain-containing protein CBSX3, mitochondrial OS=Capsicum annuum OX=4072 GN=T459_23303"	T459_23303	22.532	32.183	35.8	7	18	7	1.007	1.039	1.028	0.997	0.95	1.002	0.959	0.096901	mitochondria							IPR000644;	CBS domain;
A0A1U8E1K2	Ubiquitin carboxyl-terminal hydrolase OS=Capsicum annuum OX=4072 GN=T459_23302	T459_23302	38.285	10.183	14.7	5	5	5	1.032	0.998	0.983	1.006	1.008	0.962	0.988	0.58642	cytoplasm	GO:0043632 modification-dependent macromolecule catabolic process; GO:0070646 protein modification by small protein removal; GO:0044265 cellular macromolecule catabolic process; GO:0051603 proteolysis involved in cellular protein catabolic process; GO:0044257 cellular protein catabolic process; GO:0019941 modification-dependent protein catabolic process; GO:0044267 cellular protein metabolic proc…	GO:0005623 cell; GO:0005622 intracellular; GO:0044464 cell part;	GO:0004843 thiol-dependent ubiquitin-specific protease activity; GO:0008233 peptidase activity; GO:0036459 thiol-dependent ubiquitinyl hydrolase activity; GO:0003824 catalytic activity; GO:0101005 ubiquitinyl hydrolase activity; GO:0070011 peptidase activity, acting on L-amino acid peptides; GO:0019783 ubiquitin-like protein-specific protease activity; GO:0008234 cysteine-type peptidase activity;…	K05610			IPR001578;	Peptidase C12, ubiquitin carboxyl-terminal hydrolase;	O	KOG2778	Ubiquitin C-terminal hydrolase
A0A1U8E1K8	Uncharacterized protein OS=Capsicum annuum OX=4072 GN=T459_24405	T459_24405	21.448	2.1653	4.7	1	1	1									endoplasmic reticulum			GO:0004857 enzyme inhibitor activity; GO:0098772 molecular function regulator; GO:0030234 enzyme regulator activity;				IPR006501;	Pectinesterase inhibitor domain;
A0A1U8E1L9	Uncharacterized protein OS=Capsicum annuum OX=4072 GN=T459_21438	T459_21438	65.048	77.762	15	7	10	7	0.992	1.015	1	1.022	0.986	1.012	1.004	0.7537	chloroplast	GO:0016072 rRNA metabolic process; GO:0006396 RNA processing; GO:0034470 ncRNA processing; GO:0044085 cellular component biogenesis; GO:0022613 ribonucleoprotein complex biogenesis; GO:0006725 cellular aromatic compound metabolic process; GO:0006807 nitrogen compound metabolic process; GO:0042254 ribosome biogenesis; GO:1901360 organic cyclic compound metabolic process; GO:0044238 primary metabol…		GO:0004175 endopeptidase activity; GO:0004222 metalloendopeptidase activity; GO:0008233 peptidase activity; GO:0003824 catalytic activity; GO:0070011 peptidase activity, acting on L-amino acid peptides; GO:0016787 hydrolase activity; GO:0008237 metallopeptidase activity;				IPR023091; IPR023214;	Metalloprotease catalytic domain, predicted; HAD-like domain;
A0A1U8E1Q7	Mitogen-activated protein kinase kinase 1 OS=Capsicum annuum OX=4072 GN=T459_24356	T459_24356	39.435	13.764	22.1	6	10	6	0.946	0.992	0.977	1.088	1.008	1.033	1.073	0.056361	cytoplasm	GO:0016310 phosphorylation; GO:0044267 cellular protein metabolic process; GO:0044238 primary metabolic process; GO:0044237 cellular metabolic process; GO:0006796 phosphate-containing compound metabolic process; GO:0071704 organic substance metabolic process; GO:0008152 metabolic process; GO:0006468 protein phosphorylation; GO:0006793 phosphorus metabolic process; GO:0044260 cellular macromolecul…		GO:0005524 ATP binding; GO:1901265 nucleoside phosphate binding; GO:0016773 phosphotransferase activity, alcohol group as acceptor; GO:0001882 nucleoside binding; GO:0043167 ion binding; GO:0004672 protein kinase activity; GO:0000166 nucleotide binding; GO:0097159 organic cyclic compound binding; GO:1901363 heterocyclic compound binding; GO:0032549 ribonucleoside binding; GO:0097367 carbohydrate …	K20603	MKK2; mitogen-activated protein kinase kinase 2 [EC:2.7.12.2]	sly04016 MAPK signaling pathway - plant - Solanum lycopersicum (tomato);	IPR000719; IPR001245; IPR011009;	Protein kinase domain; Serine-threonine/tyrosine-protein kinase catalytic domain; Protein kinase-like domain;	T	KOG0581	Mitogen-activated protein kinase kinase (MAP2K)
A0A1U8E1S6	Uncharacterized protein OS=Capsicum annuum OX=4072 GN=T459_24300	T459_24300	73.372	41.441	20.4	12	17	12	1.038	0.988	0.985	1.008	0.999	0.968	0.988	0.60088	chloroplast	GO:0006518 peptide metabolic process; GO:0006725 cellular aromatic compound metabolic process; GO:0044267 cellular protein metabolic process; GO:0044699 single-organism process; GO:0009058 biosynthetic process; GO:1901566 organonitrogen compound biosynthetic process; GO:0043039 tRNA aminoacylation; GO:0044237 cellular metabolic process; GO:0071704 organic substance metabolic process; GO:0008152 m…	GO:0044424 intracellular part; GO:0005623 cell; GO:0044464 cell part; GO:0005622 intracellular; GO:0005737 cytoplasm;	GO:0016876 ligase activity, forming aminoacyl-tRNA and related compounds; GO:0005524 ATP binding; GO:1901265 nucleoside phosphate binding; GO:0016875 ligase activity, forming carbon-oxygen bonds; GO:0001882 nucleoside binding; GO:0043167 ion binding; GO:0016874 ligase activity; GO:0000166 nucleotide binding; GO:0097159 organic cyclic compound binding; GO:1901363 heterocyclic compound binding; GO:…	K01887	RARS; arginyl-tRNA synthetase [EC:6.1.1.19]	sly00970 Aminoacyl-tRNA biosynthesis - Solanum lycopersicum (tomato);	IPR014729; IPR008909; IPR005148; IPR009080;	Rossmann-like alpha/beta/alpha sandwich fold; DALR anticodon binding; Arginyl tRNA synthetase N-terminal domain; Aminoacyl-tRNA synthetase, class Ia, anticodon-binding;	J	KOG4426	Arginyl-tRNA synthetase
A0A1U8E1T0	Histone H4 OS=Capsicum annuum OX=4072 GN=T459_01439	T459_01439	11.425	3.5662	51.5	7	32	1	1.085	1.127	1.195	0.902	0.861	0.897	0.781	0.00146131	nucleus	GO:0044085 cellular component biogenesis; GO:0016043 cellular component organization; GO:0034728 nucleosome organization; GO:0034622 cellular macromolecular complex assembly; GO:0006333 chromatin assembly or disassembly; GO:0043933 macromolecular complex subunit organization; GO:0065004 protein-DNA complex assembly; GO:0006323 DNA packaging; GO:0006334 nucleosome assembly; GO:0051276 chromosome o…	GO:0043229 intracellular organelle; GO:0043232 intracellular non-membrane-bounded organelle; GO:0044446 intracellular organelle part; GO:0032991 macromolecular complex; GO:0044424 intracellular part; GO:0005623 cell; GO:0044422 organelle part; GO:0044427 chromosomal part; GO:0000786 nucleosome; GO:0043228 non-membrane-bounded organelle; GO:0043231 intracellular membrane-bounded organelle; GO:0043…	GO:0097159 organic cyclic compound binding; GO:1901363 heterocyclic compound binding; GO:0003677 DNA binding; GO:0046982 protein heterodimerization activity; GO:0005488 binding; GO:0046983 protein dimerization activity; GO:0003676 nucleic acid binding; GO:0005515 protein binding;	K11254			IPR009072;	Histone-fold;	B	KOG3467	Histone H4
A0A1U8E1T5	Putative mitochondrial-processing peptidase subunit alpha-1 OS=Capsicum annuum OX=4072 GN=T459_24308	T459_24308	54.739	99.668	36.4	13	34	13	1.003	1.023	1.01	0.984	0.999	0.996	0.981	0.062742	mitochondria	GO:0006508 proteolysis; GO:0008152 metabolic process; GO:0043170 macromolecule metabolic process; GO:0019538 protein metabolic process; GO:0044238 primary metabolic process; GO:0071704 organic substance metabolic process;		GO:0004175 endopeptidase activity; GO:0004222 metalloendopeptidase activity; GO:0008233 peptidase activity; GO:0003824 catalytic activity; GO:0005488 binding; GO:0043167 ion binding; GO:0070011 peptidase activity, acting on L-amino acid peptides; GO:0043169 cation binding; GO:0046872 metal ion binding; GO:0008237 metallopeptidase activity; GO:0016787 hydrolase activity;	K01412			IPR007863; IPR011765; IPR011249; IPR011237;	Peptidase M16, C-terminal; Peptidase M16, N-terminal; Metalloenzyme, LuxS/M16 peptidase-like; Peptidase M16 domain;	O	KOG2067	Mitochondrial processing peptidase, alpha subunit
A0A1U8E1W0	Uncharacterized protein OS=Capsicum annuum OX=4072 GN=T459_01592	T459_01592	23.593	10.587	5.6	1	2	1	1.012	0.967	0.962	1.064	0.97	1.032	1.043	0.26296	plasma membrane							IPR025423;	Domain of unknown function DUF4149;	S	KOG2886	Uncharacterized conserved protein
A0A1U8E220	"Dihydroorotate dehydrogenase (quinone), mitochondrial OS=Capsicum annuum OX=4072 GN=T459_21139"	T459_21139	48.848	24.81	14.2	5	8	5	0.99	0.985	1.009	1.02	1.016	1.025	1.026	0.030224	chloroplast	GO:0006725 cellular aromatic compound metabolic process; GO:0044699 single-organism process; GO:0009058 biosynthetic process; GO:1901566 organonitrogen compound biosynthetic process; GO:0044237 cellular metabolic process; GO:0071704 organic substance metabolic process; GO:0072528 pyrimidine-containing compound biosynthetic process; GO:0008152 metabolic process; GO:0046483 heterocycle metabolic pr…	GO:0016020 membrane; GO:0044424 intracellular part; GO:0005623 cell; GO:0044464 cell part; GO:0005622 intracellular; GO:0005737 cytoplasm;	GO:0004152 dihydroorotate dehydrogenase activity; GO:0016627 oxidoreductase activity, acting on the CH-CH group of donors; GO:0016635 oxidoreductase activity, acting on the CH-CH group of donors, quinone or related compound as acceptor; GO:0003824 catalytic activity; GO:0016491 oxidoreductase activity;	K00254	DHODH; dihydroorotate dehydrogenase [EC:1.3.5.2]	sly01100 Metabolic pathways - Solanum lycopersicum (tomato); sly00240 Pyrimidine metabolism - Solanum lycopersicum (tomato);	IPR013785; IPR005720;	Aldolase-type TIM barrel; Dihydroorotate dehydrogenase domain;	F	KOG1436	Dihydroorotate dehydrogenase
A0A1U8E224	"Thioredoxin X, chloroplastic OS=Capsicum annuum OX=4072 GN=T459_21143"	T459_21143	21.107	25.112	17.8	4	9	4	1.031	0.999	1.023	0.977	0.988	0.98	0.965	0.023279	chloroplast	GO:0050794 regulation of cellular process; GO:0065008 regulation of biological quality; GO:0045454 cell redox homeostasis; GO:0044281 small molecule metabolic process; GO:0044763 single-organism cellular process; GO:0019725 cellular homeostasis; GO:0018904 ether metabolic process; GO:0044699 single-organism process; GO:0071704 organic substance metabolic process; GO:0042592 homeostatic process; G…		GO:0015035 protein disulfide oxidoreductase activity; GO:0016667 oxidoreductase activity, acting on a sulfur group of donors; GO:0015036 disulfide oxidoreductase activity; GO:0003824 catalytic activity; GO:0016491 oxidoreductase activity;				IPR012336; IPR013766;	Thioredoxin-like fold; Thioredoxin domain;	O	KOG0910	Thioredoxin-like protein
A0A1U8E233	Elongation factor 2 OS=Capsicum annuum OX=4072 GN=T459_21553	T459_21553	94.062	323.31	42.5	35	103	2	1.105	0.983	0.825	1.037	0.936	1.12	1.062	0.553	cytoplasm			GO:1901265 nucleoside phosphate binding; GO:0001882 nucleoside binding; GO:0043167 ion binding; GO:0016817 hydrolase activity, acting on acid anhydrides; GO:0016787 hydrolase activity; GO:0000166 nucleotide binding; GO:0017111 nucleoside-triphosphatase activity; GO:0097159 organic cyclic compound binding; GO:1901363 heterocyclic compound binding; GO:0032549 ribonucleoside binding; GO:0097367 carb…	K03234			IPR027417; IPR000795; IPR005517; IPR005225; IPR000640; IPR004161; IPR020568; IPR009022; IPR014721; IPR009000;	P-loop containing nucleoside triphosphate hydrolase; Transcription factor, GTP-binding domain; Translation elongation factor EFG/EF2, domain IV; Small GTP-binding protein domain; Translation elongation factor EFG, V domain; Translation elongation factor EFTu-like, domain 2; Ribosomal protein S5 domain 2-type fold; Elongation factor G, III-V domain; Ribosomal protein S5 domain 2-type fold, subgrou…	J	KOG0469	Elongation factor 2
A0A1U8E2B0	Cytochrome b-c1 complex subunit 7 OS=Capsicum annuum OX=4072 GN=T459_21616	T459_21616	14.488	28.321	41.5	4	14	4	0.986	0.981	1.006	0.998	1.016	0.995	1.012	0.29764	mitochondria	GO:0016310 phosphorylation; GO:0009116 nucleoside metabolic process; GO:0042278 purine nucleoside metabolic process; GO:0006725 cellular aromatic compound metabolic process; GO:0009167 purine ribonucleoside monophosphate metabolic process; GO:0042773 ATP synthesis coupled electron transport; GO:0009259 ribonucleotide metabolic process; GO:0009117 nucleotide metabolic process; GO:0044699 single-or…	GO:0016020 membrane; GO:0098800 inner mitochondrial membrane protein complex; GO:0031090 organelle membrane; GO:0098796 membrane protein complex; GO:0005737 cytoplasm; GO:0031224 intrinsic component of membrane; GO:0032991 macromolecular complex; GO:0098798 mitochondrial protein complex; GO:0044424 intracellular part; GO:0005623 cell; GO:0044455 mitochondrial membrane part; GO:0044422 organelle p…		K00417	QCR7; ubiquinol-cytochrome c reductase subunit 7	sly00190 Oxidative phosphorylation - Solanum lycopersicum (tomato); sly01100 Metabolic pathways - Solanum lycopersicum (tomato);			C	KOG3440	Ubiquinol cytochrome c reductase, subunit QCR7
A0A1U8E2E6	Uncharacterized protein OS=Capsicum annuum OX=4072 GN=T459_24151	T459_24151	44.716	38.476	20.2	6	8	6	1.002	0.994	0.995	0.989	1.015	0.986	1	0.96754	mitochondria							IPR011256; IPR032710;	Regulatory factor, effector binding domain; NTF2-like domain;
A0A1U8E2F0	"DEAD-box ATP-dependent RNA helicase 3, chloroplastic OS=Capsicum annuum OX=4072 GN=T459_21333"	T459_21333	81.527	72.468	23.1	15	18	15	1.083	1.087	1.079	0.929	0.9	0.915	0.845	5.8157e-05	chloroplast		GO:0043226 organelle; GO:0043231 intracellular membrane-bounded organelle; GO:0043229 intracellular organelle; GO:0005634 nucleus; GO:0044464 cell part; GO:0005622 intracellular; GO:0044424 intracellular part; GO:0043227 membrane-bounded organelle; GO:0005623 cell;	GO:1901265 nucleoside phosphate binding; GO:0016817 hydrolase activity, acting on acid anhydrides; GO:0016787 hydrolase activity; GO:1901363 heterocyclic compound binding; GO:0097159 organic cyclic compound binding; GO:0016462 pyrophosphatase activity; GO:0003824 catalytic activity; GO:0032553 ribonucleotide binding; GO:0005488 binding; GO:0032550 purine ribonucleoside binding; GO:0043169 cation …				IPR011545; IPR014014; IPR012562; IPR014001; IPR027417; IPR001650; IPR001878;	DEAD/DEAH box helicase domain; RNA helicase, DEAD-box type, Q motif; GUCT; Helicase superfamily 1/2, ATP-binding domain; P-loop containing nucleoside triphosphate hydrolase; Helicase, C-terminal; Zinc finger, CCHC-type;	A	KOG0331	ATP-dependent RNA helicase
A0A1U8E2G5	KH domain-containing protein OS=Capsicum annuum OX=4072 GN=T459_21338	T459_21338	66.678	28.993	18.7	10	13	10	0.971	1.054	0.992	1.028	0.986	0.985	0.994	0.85346	nucleus			GO:0097159 organic cyclic compound binding; GO:1901363 heterocyclic compound binding; GO:0003723 RNA binding; GO:0005488 binding; GO:0003676 nucleic acid binding;	K21444			IPR004087; IPR004088;	K Homology domain; K Homology domain, type 1;	AR	KOG2190	PolyC-binding proteins alphaCP-1 and related KH domain proteins
A0A1U8E2I0	Uncharacterized protein OS=Capsicum annuum OX=4072 GN=T459_21307	T459_21307	37.509	6.6806	13.5	4	4	4	0.958	1.108	1.067	0.99	0.92	0.975	0.921	0.173145	chloroplast
A0A1U8E2J1	La protein 1 OS=Capsicum annuum OX=4072 GN=T459_21701	T459_21701	50.157	29.881	15.4	5	6	5	0.984	0.939	0.977	1.016	1.026	1.021	1.056	0.020823	nucleus	GO:0006396 RNA processing; GO:0006725 cellular aromatic compound metabolic process; GO:1901360 organic cyclic compound metabolic process; GO:0006807 nitrogen compound metabolic process; GO:0044238 primary metabolic process; GO:0044237 cellular metabolic process; GO:0071704 organic substance metabolic process; GO:0016070 RNA metabolic process; GO:0008152 metabolic process; GO:0090304 nucleic acid …	GO:0043226 organelle; GO:0043231 intracellular membrane-bounded organelle; GO:0043229 intracellular organelle; GO:0005634 nucleus; GO:0044464 cell part; GO:0005622 intracellular; GO:0032991 macromolecular complex; GO:0044424 intracellular part; GO:1990904 ribonucleoprotein complex; GO:0030529 intracellular ribonucleoprotein complex; GO:0043227 membrane-bounded organelle; GO:0005623 cell;	GO:0097159 organic cyclic compound binding; GO:1901363 heterocyclic compound binding; GO:0003723 RNA binding; GO:1901265 nucleoside phosphate binding; GO:0005488 binding; GO:0003676 nucleic acid binding; GO:0000166 nucleotide binding; GO:0036094 small molecule binding;	K11090			IPR011991; IPR006630; IPR000504; IPR012677; IPR014886;	Winged helix-turn-helix DNA-binding domain; RNA-binding protein Lupus La; RNA recognition motif domain; Nucleotide-binding alpha-beta plait domain; La protein, RNA-binding domain;	R	KOG0118	FOG: RRM domain
A0A1U8E2K1	Glucosamine 6-phosphate N-acetyltransferase OS=Capsicum annuum OX=4072 GN=T459_22397	T459_22397	18.023	29.607	37.8	5	6	5	1.056	1.044	1.027	0.941	0.957	0.962	0.915	0.00104047	chloroplast			GO:0016746 transferase activity, transferring acyl groups; GO:0008080 N-acetyltransferase activity; GO:0003824 catalytic activity; GO:0016740 transferase activity; GO:0016747 transferase activity, transferring acyl groups other than amino-acyl groups; GO:0016407 acetyltransferase activity; GO:0016410 N-acyltransferase activity;	K00621	GNPNAT1; glucosamine-phosphate N-acetyltransferase [EC:2.3.1.4]	sly00520 Amino sugar and nucleotide sugar metabolism - Solanum lycopersicum (tomato);	IPR000182; IPR016181;	GNAT domain; Acyl-CoA N-acyltransferase;	M	KOG3396	Glucosamine-phosphate N-acetyltransferase
A0A1U8E2K4	Protein EMSY-LIKE 3 OS=Capsicum annuum OX=4072 GN=T459_02374	T459_02374	46.994	6.9445	8.4	3	3	3	0.983	0.904	1.01	0.939	1.04	1.122	1.07	0.33994	nucleus							IPR005491;	ENT domain;	R	KOG4675	Uncharacterized conserved protein, contains ENT domain
A0A1U8E2K7	1-aminocyclopropane-1-carboxylate oxidase-like protein 12 OS=Capsicum annuum OX=4072 GN=T459_22418	T459_22418	45.597	3.3162	5.5	2	2	2	0.833	0.442	0.984	0.994	1.12	1.602	1.645	0.133536	cytoplasm	GO:0044699 single-organism process; GO:0008152 metabolic process; GO:0055114 oxidation-reduction process; GO:0044710 single-organism metabolic process;		GO:0003824 catalytic activity; GO:0016491 oxidoreductase activity;				IPR005123; IPR027443; IPR026992;	Oxoglutarate/iron-dependent dioxygenase; Isopenicillin N synthase-like; Non-haem dioxygenase N-terminal domain;	QR	KOG0143	Iron/ascorbate family oxidoreductases
A0A1U8E2Q2	Putative L-ascorbate peroxidase 6 OS=Capsicum annuum OX=4072 GN=T459_21365	T459_21365	35.509	29.866	26.8	7	12	7	1.029	1.01	1.064	0.942	1.007	0.968	0.94	0.065779	nucleus	GO:0008152 metabolic process; GO:0006950 response to stress; GO:0055114 oxidation-reduction process; GO:0044710 single-organism metabolic process; GO:0006979 response to oxidative stress; GO:0044699 single-organism process; GO:0050896 response to stimulus;		GO:0097159 organic cyclic compound binding; GO:1901363 heterocyclic compound binding; GO:0020037 heme binding; GO:0003824 catalytic activity; GO:0005488 binding; GO:0016209 antioxidant activity; GO:0004601 peroxidase activity; GO:0046906 tetrapyrrole binding; GO:0016491 oxidoreductase activity; GO:0016684 oxidoreductase activity, acting on peroxide as acceptor;	K00434	E1.11.1.11; L-ascorbate peroxidase [EC:1.11.1.11]	sly00053 Ascorbate and aldarate metabolism - Solanum lycopersicum (tomato); sly00480 Glutathione metabolism - Solanum lycopersicum (tomato);	IPR002016;	Haem peroxidase, plant/fungal/bacterial;
A0A1U8E2S3	Glycine cleavage system P protein OS=Capsicum annuum OX=4072 GN=T459_21274	T459_21274	113.22	4.104	33.8	30	120	3	0.771	0.67	0.558	1.14	1.444	1.371	1.978	0.0043442	mitochondria	GO:1901606 alpha-amino acid catabolic process; GO:0044699 single-organism process; GO:0006544 glycine metabolic process; GO:0044237 cellular metabolic process; GO:0071704 organic substance metabolic process; GO:0006546 glycine catabolic process; GO:0008152 metabolic process; GO:0006520 cellular amino acid metabolic process; GO:0044248 cellular catabolic process; GO:0009987 cellular process; GO:00…		GO:0016638 oxidoreductase activity, acting on the CH-NH2 group of donors; GO:0016642 oxidoreductase activity, acting on the CH-NH2 group of donors, disulfide as acceptor; GO:0003824 catalytic activity; GO:0004375 glycine dehydrogenase (decarboxylating) activity; GO:0016491 oxidoreductase activity;	K00281	GLDC; glycine dehydrogenase [EC:1.4.4.2]	sly00260 Glycine, serine and threonine metabolism - Solanum lycopersicum (tomato); sly01110 Biosynthesis of secondary metabolites - Solanum lycopersicum (tomato); sly00630 Glyoxylate and dicarboxylate metabolism - Solanum lycopersicum (tomato); sly01200 Carbon metabolism - Solanum lycopersicum (tomato); sly01100 Metabolic pathways - Solanum lycopersicum (tomato);	IPR015424; IPR015421;	Pyridoxal phosphate-dependent transferase; Pyridoxal phosphate-dependent transferase, major region, subdomain 1;	E	KOG2040	Glycine dehydrogenase (decarboxylating)
A0A1U8E2W4	Histone H2A OS=Capsicum annuum OX=4072 GN=T459_23824	T459_23824	13.86	1.5672	12.1	2	5	1	1.206	1.303	0.926	0.979	0.689	0.935	0.758	0.138975	nucleus		GO:0043229 intracellular organelle; GO:0043232 intracellular non-membrane-bounded organelle; GO:0044446 intracellular organelle part; GO:0032991 macromolecular complex; GO:0044424 intracellular part; GO:0005623 cell; GO:0044422 organelle part; GO:0044427 chromosomal part; GO:0000786 nucleosome; GO:0043228 non-membrane-bounded organelle; GO:0043231 intracellular membrane-bounded organelle; GO:0043…	GO:0097159 organic cyclic compound binding; GO:1901363 heterocyclic compound binding; GO:0003677 DNA binding; GO:0046982 protein heterodimerization activity; GO:0005488 binding; GO:0046983 protein dimerization activity; GO:0003676 nucleic acid binding; GO:0005515 protein binding;	K11251			IPR009072; IPR032454; IPR007125;	Histone-fold; Histone H2A, C-terminal domain; Histone H2A/H2B/H3;	B	KOG1756	Histone 2A
A0A1U8E2Z7	"Eukaryotic translation initiation factor 1A, X-chromosomal OS=Capsicum annuum OX=4072 GN=T459_21878"	T459_21878	16.389	37.478	38.5	6	7	6	0.994	0.967	0.961	1.004	1.076	1.022	1.062	0.062576	cytoplasm	GO:0006518 peptide metabolic process; GO:0043043 peptide biosynthetic process; GO:0044267 cellular protein metabolic process; GO:0006807 nitrogen compound metabolic process; GO:0009058 biosynthetic process; GO:0043603 cellular amide metabolic process; GO:0044238 primary metabolic process; GO:1901566 organonitrogen compound biosynthetic process; GO:0044237 cellular metabolic process; GO:1901576 or…		GO:0097159 organic cyclic compound binding; GO:1901363 heterocyclic compound binding; GO:0003723 RNA binding; GO:0008135 translation factor activity, RNA binding; GO:0005488 binding; GO:0003676 nucleic acid binding; GO:0003743 translation initiation factor activity;	K03236	EIF1A; translation initiation factor 1A	sly03013 RNA transport - Solanum lycopersicum (tomato);	IPR012340; IPR006196;	Nucleic acid-binding, OB-fold; RNA-binding domain, S1, IF1 type;	J	KOG3403	Translation initiation factor 1A (eIF-1A)
A0A1U8E306	SURP and G-patch domain-containing protein 1-like protein OS=Capsicum annuum OX=4072 GN=T459_01442	T459_01442	47.221	3.004	2.8	1	1	1									nucleus	GO:0006396 RNA processing; GO:0006725 cellular aromatic compound metabolic process; GO:1901360 organic cyclic compound metabolic process; GO:0006807 nitrogen compound metabolic process; GO:0044238 primary metabolic process; GO:0044237 cellular metabolic process; GO:0071704 organic substance metabolic process; GO:0016070 RNA metabolic process; GO:0008152 metabolic process; GO:0090304 nucleic acid …		GO:0097159 organic cyclic compound binding; GO:1901363 heterocyclic compound binding; GO:0003723 RNA binding; GO:0005488 binding; GO:0003676 nucleic acid binding;	K13096			IPR000061; IPR000467;	SWAP/Surp; G-patch domain;	R	KOG0965	Predicted RNA-binding protein, contains SWAP and G-patch domains
A0A1U8E385	Uncharacterized protein OS=Capsicum annuum OX=4072 GN=T459_23635	T459_23635	26.83	-2	3.3	1	1	1	1.191	0.997	1.111	0.885	0.934	0.891	0.821	0.023385	nucleus			GO:0097159 organic cyclic compound binding; GO:1901363 heterocyclic compound binding; GO:0003677 DNA binding; GO:0005488 binding; GO:0003676 nucleic acid binding;				IPR001005; IPR009057;	SANT/Myb domain; Homeobox domain-like;
A0A1U8E392	Uncharacterized protein OS=Capsicum annuum OX=4072 GN=T459_23660	T459_23660	53.506	1.4355	2	1	1	1	0.986	1.047	1.016	1.038	0.96	0.965	0.972	0.39762	chloroplast	GO:0044699 single-organism process; GO:0008152 metabolic process; GO:0055114 oxidation-reduction process; GO:0044710 single-organism metabolic process;		GO:0003824 catalytic activity; GO:0016491 oxidoreductase activity;				IPR006076; IPR023753;	FAD dependent oxidoreductase; FAD/NAD(P)-binding domain;
A0A1U8E394	Ubiquitin-60S ribosomal protein L40-1 OS=Capsicum annuum OX=4072 GN=T459_09681	T459_09681	14.673	2.1054	44.5	6	20	1	1.081	1.073	0.962	0.925	1.009	0.955	0.927	0.174777	cytoplasm,nucleus	GO:0006518 peptide metabolic process; GO:0043043 peptide biosynthetic process; GO:0044267 cellular protein metabolic process; GO:0006807 nitrogen compound metabolic process; GO:0009058 biosynthetic process; GO:0043603 cellular amide metabolic process; GO:0044238 primary metabolic process; GO:1901566 organonitrogen compound biosynthetic process; GO:1901576 organic substance biosynthetic process; G…	GO:0005840 ribosome; GO:0043226 organelle; GO:0043229 intracellular organelle; GO:0043232 intracellular non-membrane-bounded organelle; GO:0044464 cell part; GO:0005622 intracellular; GO:0005737 cytoplasm; GO:0032991 macromolecular complex; GO:0044424 intracellular part; GO:1990904 ribonucleoprotein complex; GO:0005623 cell; GO:0030529 intracellular ribonucleoprotein complex; GO:0044444 cytoplasm…	GO:0005515 protein binding; GO:0003735 structural constituent of ribosome; GO:0005198 structural molecule activity; GO:0005488 binding;	K02927	RP-L40e; large subunit ribosomal protein L40e	sly03010 Ribosome - Solanum lycopersicum (tomato);	IPR011332; IPR029071; IPR000626;	Zinc-binding ribosomal protein; Ubiquitin-related domain; Ubiquitin domain;	J	KOG0003	Ubiquitin/60s ribosomal protein L40 fusion
A0A1U8E398	Ran-binding protein 1-like protein b OS=Capsicum annuum OX=4072 GN=T459_21595	T459_21595	23.506	65.491	32.7	7	9	5	1.004	1.03	1.011	1.066	0.968	1	0.996	0.88888	chloroplast	GO:0006810 transport; GO:0046907 intracellular transport; GO:0051649 establishment of localization in cell; GO:0051179 localization; GO:0051234 establishment of localization; GO:0051641 cellular localization;			K15306			IPR000156; IPR011993;	Ran binding domain; PH domain-like;	U	KOG0864	Ran-binding protein RANBP1 and related RanBD domain proteins
A0A1U8E3E3	"Thioredoxin M-type, chloroplastic OS=Capsicum annuum OX=4072 GN=T459_23801"	T459_23801	19.76	51.026	30.3	6	27	5	1.046	1.033	1.013	0.966	0.964	0.987	0.943	0.0083033	chloroplast	GO:0050794 regulation of cellular process; GO:0065008 regulation of biological quality; GO:0045454 cell redox homeostasis; GO:0044281 small molecule metabolic process; GO:0044763 single-organism cellular process; GO:0019725 cellular homeostasis; GO:0018904 ether metabolic process; GO:0044699 single-organism process; GO:0071704 organic substance metabolic process; GO:0042592 homeostatic process; G…		GO:0015035 protein disulfide oxidoreductase activity; GO:0016667 oxidoreductase activity, acting on a sulfur group of donors; GO:0015036 disulfide oxidoreductase activity; GO:0003824 catalytic activity; GO:0016491 oxidoreductase activity;	K03671			IPR013766; IPR012336;	Thioredoxin domain; Thioredoxin-like fold;	O	KOG0910	Thioredoxin-like protein
A0A1U8E3G7	"Putative DNA gyrase subunit A, chloroplastic/mitochondrial OS=Capsicum annuum OX=4072 GN=T459_22135"	T459_22135	104.85	13.286	6.8	5	6	5	1.081	0.996	1.004	0.963	1.036	0.993	0.971	0.43552	chloroplast	GO:0016043 cellular component organization; GO:0006725 cellular aromatic compound metabolic process; GO:0006259 DNA metabolic process; GO:1901360 organic cyclic compound metabolic process; GO:0006807 nitrogen compound metabolic process; GO:0044238 primary metabolic process; GO:0044237 cellular metabolic process; GO:0006265 DNA topological change; GO:0071704 organic substance metabolic process; GO…	GO:0043226 organelle; GO:0043229 intracellular organelle; GO:0043232 intracellular non-membrane-bounded organelle; GO:0044464 cell part; GO:0005622 intracellular; GO:0005694 chromosome; GO:0044424 intracellular part; GO:0005623 cell; GO:0043228 non-membrane-bounded organelle;	GO:0003677 DNA binding; GO:0005524 ATP binding; GO:1901265 nucleoside phosphate binding; GO:0001882 nucleoside binding; GO:0043167 ion binding; GO:0016817 hydrolase activity, acting on acid anhydrides; GO:0016787 hydrolase activity; GO:0000166 nucleotide binding; GO:0017111 nucleoside-triphosphatase activity; GO:0016887 ATPase activity; GO:1901363 heterocyclic compound binding; GO:0097159 organic…	K02469			IPR002205; IPR013758; IPR024946; IPR013760;	DNA topoisomerase, type IIA, subunit A/C-terminal; DNA topoisomerase, type IIA, subunit A/ C-terminal, alpha-beta; Arginine repressor C-terminal-like domain; DNA topoisomerase, type IIA-like domain;	B	KOG0355	DNA topoisomerase type II
A0A1U8E3G8	S-(hydroxymethyl)glutathione dehydrogenase OS=Capsicum annuum OX=4072 GN=T459_23668	T459_23668	40.625	94.796	30.3	11	23	11	1.021	1.027	1.02	0.978	0.964	0.992	0.956	0.0063425	cytoplasm	GO:0006069 ethanol oxidation; GO:0008152 metabolic process; GO:1901615 organic hydroxy compound metabolic process; GO:0044710 single-organism metabolic process; GO:0006066 alcohol metabolic process; GO:0055114 oxidation-reduction process; GO:0044281 small molecule metabolic process; GO:0006067 ethanol metabolic process; GO:0044699 single-organism process; GO:0034308 primary alcohol metabolic proc…		GO:0016614 oxidoreductase activity, acting on CH-OH group of donors; GO:0016616 oxidoreductase activity, acting on the CH-OH group of donors, NAD or NADP as acceptor; GO:0046914 transition metal ion binding; GO:0003824 catalytic activity; GO:0005488 binding; GO:0043167 ion binding; GO:0046872 metal ion binding; GO:0043169 cation binding; GO:0008270 zinc ion binding; GO:0051903 S-(hydroxymethyl)gl…	K00121	frmA; S-(hydroxymethyl)glutathione dehydrogenase / alcohol dehydrogenase [EC:1.1.1.284 1.1.1.1]	sly01110 Biosynthesis of secondary metabolites - Solanum lycopersicum (tomato); sly00350 Tyrosine metabolism - Solanum lycopersicum (tomato); sly01200 Carbon metabolism - Solanum lycopersicum (tomato); sly00010 Glycolysis / Gluconeogenesis - Solanum lycopersicum (tomato); sly01100 Metabolic pathways - Solanum lycopersicum (tomato); sly00071 Fatty acid degradation - Solanum lycopersicum (tomato);	IPR011032; IPR016040; IPR013154; IPR013149;	GroES-like; NAD(P)-binding domain; Alcohol dehydrogenase, N-terminal; Alcohol dehydrogenase, C-terminal;	Q	KOG0022	Alcohol dehydrogenase, class III
A0A1U8E3H0	Uncharacterized protein OS=Capsicum annuum OX=4072 GN=T459_21632	T459_21632	17.987	1.6285	6.5	1	1	1									nucleus			GO:0043169 cation binding; GO:0046872 metal ion binding; GO:0008270 zinc ion binding; GO:0046914 transition metal ion binding; GO:0005488 binding; GO:0043167 ion binding;				IPR001876;	Zinc finger, RanBP2-type;	R	KOG4198	RNA-binding Ran Zn-finger protein and related proteins
A0A1U8E3M7	"Putative glucan endo-1,3-beta-glucosidase A6 OS=Capsicum annuum OX=4072 GN=T459_22187"	T459_22187	51.665	2.7288	4.5	2	2	2	1.019	1.117	0.955	1.039	0.937	0.948	0.946	0.38504	vacuolar membrane	GO:0008152 metabolic process; GO:0005975 carbohydrate metabolic process; GO:0044238 primary metabolic process; GO:0071704 organic substance metabolic process;		GO:0004553 hydrolase activity, hydrolyzing O-glycosyl compounds; GO:0016787 hydrolase activity; GO:0003824 catalytic activity; GO:0016798 hydrolase activity, acting on glycosyl bonds;				IPR012946; IPR017853; IPR013781;	X8 domain; Glycoside hydrolase superfamily; Glycoside hydrolase, catalytic domain;
A0A1U8E3P8	Annexin OS=Capsicum annuum OX=4072 GN=T459_22196	T459_22196	35.819	24.687	15.7	5	6	5	1.046	1.145	1.051	0.843	0.984	0.941	0.854	0.043225	chloroplast			GO:0005544 calcium-dependent phospholipid binding; GO:0005488 binding; GO:0005543 phospholipid binding; GO:0043167 ion binding; GO:0008289 lipid binding; GO:0043169 cation binding; GO:0046872 metal ion binding; GO:0043168 anion binding; GO:0005509 calcium ion binding;	K17098					U	KOG0819	Annexin
A0A1U8E3Q9	Uncharacterized protein OS=Capsicum annuum OX=4072 GN=T459_23621	T459_23621	90.038	5.6641	3.7	3	3	3	1.148	0.939	1.068	0.965	0.95	0.936	0.904	0.24098	nucleus	GO:0006396 RNA processing; GO:0006725 cellular aromatic compound metabolic process; GO:1901360 organic cyclic compound metabolic process; GO:0006807 nitrogen compound metabolic process; GO:0044238 primary metabolic process; GO:0044237 cellular metabolic process; GO:0071704 organic substance metabolic process; GO:0016070 RNA metabolic process; GO:0008152 metabolic process; GO:0090304 nucleic acid …		GO:0005515 protein binding; GO:0005488 binding;	K13217			IPR011990;	Tetratricopeptide-like helical domain;	A	KOG1258	mRNA processing protein
A0A1U8E3S1	"Ferredoxin-thioredoxin reductase, variable chain, chloroplastic OS=Capsicum annuum OX=4072 GN=T459_02552"	T459_02552	17.009	37.703	43.5	5	12	5	1.038	1.031	0.996	0.976	1.005	0.979	0.966	0.092636	chloroplast	GO:0008152 metabolic process; GO:0044237 cellular metabolic process; GO:0009987 cellular process; GO:0015979 photosynthesis;						IPR004207; IPR008990;	Ferredoxin thioredoxin reductase, alpha chain; Electron transport accessory protein-like domain;	H	KOG2672	Lipoate synthase
A0A1U8E3T7	"Bifunctional monothiol glutaredoxin-S16, chloroplastic OS=Capsicum annuum OX=4072 GN=T459_23552"	T459_23552	35.568	67.414	32.2	8	16	8	0.983	1.039	0.979	1.009	0.994	1.035	1.012	0.60888	chloroplast	GO:0050794 regulation of cellular process; GO:0042592 homeostatic process; GO:0065008 regulation of biological quality; GO:0050789 regulation of biological process; GO:0045454 cell redox homeostasis; GO:0044763 single-organism cellular process; GO:0019725 cellular homeostasis; GO:0044699 single-organism process; GO:0009987 cellular process; GO:0065007 biological regulation;		GO:0015035 protein disulfide oxidoreductase activity; GO:0016667 oxidoreductase activity, acting on a sulfur group of donors; GO:0015036 disulfide oxidoreductase activity; GO:0009055 electron carrier activity; GO:0003824 catalytic activity; GO:0016491 oxidoreductase activity;				IPR033658; IPR002109; IPR012336;	Glutaredoxin, PICOT-like; Glutaredoxin; Thioredoxin-like fold;	O	KOG0911	Glutaredoxin-related protein
A0A1U8E3Z7	40S ribosomal protein S24 OS=Capsicum annuum OX=4072 GN=T459_23312	T459_23312	15.393	45.478	32.3	5	11	3	1.072	1.04	1.087	0.921	0.934	0.88	0.855	0.0021208	cytoplasm	GO:0006518 peptide metabolic process; GO:0043043 peptide biosynthetic process; GO:0044267 cellular protein metabolic process; GO:0006807 nitrogen compound metabolic process; GO:0009058 biosynthetic process; GO:0043603 cellular amide metabolic process; GO:0044238 primary metabolic process; GO:1901566 organonitrogen compound biosynthetic process; GO:1901576 organic substance biosynthetic process; G…	GO:0005840 ribosome; GO:0043226 organelle; GO:0043229 intracellular organelle; GO:0043232 intracellular non-membrane-bounded organelle; GO:0044464 cell part; GO:0005622 intracellular; GO:0005737 cytoplasm; GO:0032991 macromolecular complex; GO:0044424 intracellular part; GO:1990904 ribonucleoprotein complex; GO:0005623 cell; GO:0030529 intracellular ribonucleoprotein complex; GO:0044444 cytoplasm…	GO:0097159 organic cyclic compound binding; GO:1901363 heterocyclic compound binding; GO:1901265 nucleoside phosphate binding; GO:0005488 binding; GO:0000166 nucleotide binding; GO:0005198 structural molecule activity; GO:0003735 structural constituent of ribosome; GO:0036094 small molecule binding;	K02974	RP-S24e; small subunit ribosomal protein S24e	sly03010 Ribosome - Solanum lycopersicum (tomato);	IPR012678; IPR012677;	Ribosomal protein L23/L15e core domain; Nucleotide-binding alpha-beta plait domain;	J	KOG3424	40S ribosomal protein S24
A0A1U8E404	"Glyoxylate/succinic semialdehyde reductase 2, chloroplastic OS=Capsicum annuum OX=4072 GN=T459_23301"	T459_23301	30.835	94.375	46.1	9	17	9	0.985	1.012	0.976	1.015	0.974	1.006	1.007	0.68118	chloroplast	GO:0044699 single-organism process; GO:0008152 metabolic process; GO:0055114 oxidation-reduction process; GO:0044710 single-organism metabolic process;		GO:0097159 organic cyclic compound binding; GO:1901363 heterocyclic compound binding; GO:0016614 oxidoreductase activity, acting on CH-OH group of donors; GO:0016616 oxidoreductase activity, acting on the CH-OH group of donors, NAD or NADP as acceptor; GO:0004616 phosphogluconate dehydrogenase (decarboxylating) activity; GO:1901265 nucleoside phosphate binding; GO:0051287 NAD binding; GO:0003824 …	K18121	GLYR; glyoxylate/succinic semialdehyde reductase [EC:1.1.1.79 1.1.1.-]	sly00650 Butanoate metabolism - Solanum lycopersicum (tomato); sly00630 Glyoxylate and dicarboxylate metabolism - Solanum lycopersicum (tomato); sly01200 Carbon metabolism - Solanum lycopersicum (tomato); sly01100 Metabolic pathways - Solanum lycopersicum (tomato);	IPR006115; IPR013328; IPR008927; IPR016040; IPR029154;	6-phosphogluconate dehydrogenase, NADP-binding; 6-phosphogluconate dehydrogenase, domain 2; 6-phosphogluconate dehydrogenase C-terminal domain-like; NAD(P)-binding domain; 3-hydroxyisobutyrate dehydrogenase, NAD-binding domain;	R	KOG0409	Predicted dehydrogenase
A0A1U8E415	"ATP synthase subunit O, mitochondrial OS=Capsicum annuum OX=4072 GN=T459_02505"	T459_02505	26.163	29.977	30.5	9	21	9	1.01	1.013	0.973	0.988	1.023	0.969	0.995	0.80372	chloroplast	GO:0009116 nucleoside metabolic process; GO:0042278 purine nucleoside metabolic process; GO:0009167 purine ribonucleoside monophosphate metabolic process; GO:0009117 nucleotide metabolic process; GO:0044699 single-organism process; GO:0046129 purine ribonucleoside biosynthetic process; GO:0009163 nucleoside biosynthetic process; GO:0009058 biosynthetic process; GO:0009156 ribonucleoside monophosp…	GO:0016020 membrane;	GO:0022804 active transmembrane transporter activity; GO:0042625 ATPase coupled ion transmembrane transporter activity; GO:0015075 ion transmembrane transporter activity; GO:0022853 active ion transmembrane transporter activity; GO:0015399 primary active transmembrane transporter activity; GO:0022892 substrate-specific transporter activity; GO:0044769 ATPase activity, coupled to transmembrane mov…	K02137	ATPeF0O; F-type H+-transporting ATPase subunit O	sly00190 Oxidative phosphorylation - Solanum lycopersicum (tomato); sly01100 Metabolic pathways - Solanum lycopersicum (tomato);	IPR026015;	F1F0 ATP synthase OSCP/delta subunit, N-terminal domain;	C	KOG1662	Mitochondrial F1F0-ATP synthase, subunit OSCP/ATP5
A0A1U8E418	"Alpha-1,4 glucan phosphorylase OS=Capsicum annuum OX=4072 GN=T459_23272"	T459_23272	96.254	68.146	24.9	15	17	14	0.955	1.003	0.98	1.01	0.994	1.034	1.034	0.139424	cytoplasm	GO:0008152 metabolic process; GO:0005975 carbohydrate metabolic process; GO:0044238 primary metabolic process; GO:0071704 organic substance metabolic process;		GO:0097159 organic cyclic compound binding; GO:1901363 heterocyclic compound binding; GO:0016758 transferase activity, transferring hexosyl groups; GO:0003824 catalytic activity; GO:0005488 binding; GO:0043167 ion binding; GO:0004645 phosphorylase activity; GO:0043168 anion binding; GO:0016757 transferase activity, transferring glycosyl groups; GO:0048037 cofactor binding; GO:0016740 transferase …	K00688	PYG; glycogen phosphorylase [EC:2.4.1.1]	sly01110 Biosynthesis of secondary metabolites - Solanum lycopersicum (tomato); sly00500 Starch and sucrose metabolism - Solanum lycopersicum (tomato); sly01100 Metabolic pathways - Solanum lycopersicum (tomato);			G	KOG2099	Glycogen phosphorylase
A0A1U8E430	Uncharacterized protein OS=Capsicum annuum OX=4072 GN=T459_23444	T459_23444	16.567	2.9512	7.1	1	1	1	1.037	1.03	0.941	0.963	1.024	1.009	0.996	0.93068	cytoplasm				K17362			IPR006683; IPR003736; IPR029069;	Thioesterase domain; Phenylacetic acid degradation-related domain; HotDog domain;	R	KOG3328	HGG motif-containing thioesterase
A0A1U8E433	Phosphoglycerate mutase-like protein AT74 OS=Capsicum annuum OX=4072 GN=T459_22330	T459_22330	33.311	24.816	29.6	8	9	2	0.638	0.67	0.685	1.346	1.301	1.333	1.997	3.8325e-06	mitochondria	GO:0008152 metabolic process;		GO:0003824 catalytic activity;
A0A1U8E472	Uncharacterized protein OS=Capsicum annuum OX=4072 GN=T459_32963	T459_32963	37.76	24.998	20.8	4	5	4	1.011	1.006	1.048	0.996	0.967	0.999	0.966	0.108259	chloroplast							IPR018962;	Domain of unknown function DUF1995;
A0A1U8E480	Importin subunit beta-1 OS=Capsicum annuum OX=4072 GN=T459_23522	T459_23522	96.608	4.1666	1.4	1	1	1									chloroplast	GO:0045184 establishment of protein localization; GO:0006810 transport; GO:0046907 intracellular transport; GO:0070727 cellular macromolecule localization; GO:0051649 establishment of localization in cell; GO:0006886 intracellular protein transport; GO:0071702 organic substance transport; GO:0008104 protein localization; GO:0033036 macromolecule localization; GO:0034613 cellular protein localizat…		GO:0031267 small GTPase binding; GO:0017016 Ras GTPase binding; GO:0005488 binding; GO:0005515 protein binding; GO:0008536 Ran GTPase binding; GO:0051020 GTPase binding; GO:0019899 enzyme binding;	K14293	KPNB1; importin subunit beta-1	sly03013 RNA transport - Solanum lycopersicum (tomato);	IPR001494; IPR011989; IPR016024;	Importin-beta, N-terminal domain; Armadillo-like helical; Armadillo-type fold;	YU	KOG1241	Karyopherin (importin) beta 1
A0A1U8E484	Uncharacterized protein OS=Capsicum annuum OX=4072 GN=T459_21843	T459_21843	28.19	1.3013	6.4	2	2	2									chloroplast							IPR032710;	NTF2-like domain;
A0A1U8E489	Uncharacterized protein OS=Capsicum annuum OX=4072 GN=T459_02501	T459_02501	25.5	6.2455	8.6	2	3	2	0.955	1.012	0.986	1.025	0.979	1.037	1.03	0.29354	chloroplast
A0A1U8E4A8	BTB/POZ domain-containing protein OS=Capsicum annuum OX=4072 GN=T459_21877	T459_21877	62.713	1.5805	1.6	1	1	1									nucleus			GO:0005515 protein binding; GO:0005488 binding;				IPR008974; IPR011333; IPR011705; IPR000210;	TRAF-like; SKP1/BTB/POZ domain; BTB/Kelch-associated; BTB/POZ domain;	TR	KOG4441	Proteins containing BTB/POZ and Kelch domains, involved in regulatory/signal transduction processes
A0A1U8E4C0	Zinc finger CCCH domain-containing protein 58 OS=Capsicum annuum OX=4072 GN=T459_02943	T459_02943	51.115	1.8956	3.9	2	2	2	1	0.942	1.016	0.951	1.003	1.092	1.03	0.5758	nucleus			GO:0046872 metal ion binding; GO:0043169 cation binding; GO:0005488 binding; GO:0043167 ion binding;				IPR000571;	Zinc finger, CCCH-type;	R	KOG1677	CCCH-type Zn-finger protein
A0A1U8E4F3	Uncharacterized protein OS=Capsicum annuum OX=4072 GN=T459_23790	T459_23790	22.485	-2	4	1	1	1	1.203	0.866	1.094	0.797	1.145	0.882	0.893	0.47026	nucleus
A0A1U8E4F5	ATP-dependent Clp protease proteolytic subunit OS=Capsicum annuum OX=4072 GN=T459_34105	T459_34105	35.75	40.283	14.2	4	7	4	0.965	1.007	0.982	0.975	1.044	1.016	1.027	0.31594	mitochondria	GO:0006508 proteolysis; GO:0008152 metabolic process; GO:0043170 macromolecule metabolic process; GO:0019538 protein metabolic process; GO:0044238 primary metabolic process; GO:0071704 organic substance metabolic process;		GO:0004252 serine-type endopeptidase activity; GO:0004175 endopeptidase activity; GO:0008233 peptidase activity; GO:0003824 catalytic activity; GO:0017171 serine hydrolase activity; GO:0008236 serine-type peptidase activity; GO:0070011 peptidase activity, acting on L-amino acid peptides; GO:0016787 hydrolase activity;				IPR029045;	ClpP/crotonase-like domain;	O	KOG0840	ATP-dependent Clp protease, proteolytic subunit
A0A1U8E4G2	Uncharacterized protein OS=Capsicum annuum OX=4072 GN=T459_21969	T459_21969	62.083	4.397	4.3	2	2	2	1.01	1.008	1.061	0.938	0.978	1.013	0.951	0.146002	cytoplasm							IPR021099;	Plant organelle RNA recognition domain;
A0A1U8E4G4	"Chloroplast stem-loop binding protein of 41 kDa a, chloroplastic OS=Capsicum annuum OX=4072 GN=T459_23325"	T459_23325	44.091	115.69	38.7	13	40	13	0.968	0.982	0.993	1.011	1.021	1.003	1.031	0.026662	chloroplast			GO:0048037 cofactor binding; GO:0003824 catalytic activity; GO:0005488 binding; GO:0050662 coenzyme binding;				IPR001509; IPR016040;	NAD-dependent epimerase/dehydratase; NAD(P)-binding domain;
A0A1U8E4J4	Sorting nexin 2A OS=Capsicum annuum OX=4072 GN=T459_23289	T459_23289	61.703	7.4834	11.3	6	6	5	1.032	0.949	1.008	0.978	1.021	1.014	1.008	0.78046	nucleus			GO:0008289 lipid binding; GO:0043168 anion binding; GO:0005488 binding; GO:0035091 phosphatidylinositol binding; GO:0005543 phospholipid binding; GO:0043167 ion binding;	K17917	SNX1_2; sorting nexin-1/2	sly04144 Endocytosis - Solanum lycopersicum (tomato);	IPR015404; IPR001683;	Sorting nexin Vps5-like, C-terminal; Phox homologous domain;	U	KOG2273	Membrane coat complex Retromer, subunit VPS5/SNX1, Sorting nexins, and related PX domain-containing proteins
A0A1U8E4N5	"Divinyl chlorophyllide a 8-vinyl-reductase, chloroplastic OS=Capsicum annuum OX=4072 GN=T459_02964"	T459_02964	46.129	28.099	13.8	6	11	6	1.012	1.017	1.028	0.963	0.974	0.938	0.94	0.0070232	chloroplast				K19073	DVR; divinyl chlorophyllide a 8-vinyl-reductase [EC:1.3.1.75]	sly00860 Porphyrin and chlorophyll metabolism - Solanum lycopersicum (tomato); sly01110 Biosynthesis of secondary metabolites - Solanum lycopersicum (tomato); sly01100 Metabolic pathways - Solanum lycopersicum (tomato);	IPR016040;	NAD(P)-binding domain;	G	KOG1203	Predicted dehydrogenase
A0A1U8E4P3	Bifunctional fucokinase/fucose pyrophosphorylase OS=Capsicum annuum OX=4072 GN=T459_22008	T459_22008	117.31	2.6201	1.9	2	2	2									nucleus	GO:0008152 metabolic process;	GO:0044424 intracellular part; GO:0005623 cell; GO:0044464 cell part; GO:0005622 intracellular; GO:0005737 cytoplasm;	GO:0005524 ATP binding; GO:1901265 nucleoside phosphate binding; GO:0016773 phosphotransferase activity, alcohol group as acceptor; GO:0001882 nucleoside binding; GO:0043167 ion binding; GO:0000166 nucleotide binding; GO:0097159 organic cyclic compound binding; GO:1901363 heterocyclic compound binding; GO:0032549 ribonucleoside binding; GO:0097367 carbohydrate derivative binding; GO:0016301 kinas…	K05305	FUK; fucokinase [EC:2.7.1.52]	sly00051 Fructose and mannose metabolism - Solanum lycopersicum (tomato); sly01100 Metabolic pathways - Solanum lycopersicum (tomato); sly00520 Amino sugar and nucleotide sugar metabolism - Solanum lycopersicum (tomato);	IPR020568; IPR006204; IPR012887; IPR014721; IPR013750;	Ribosomal protein S5 domain 2-type fold; GHMP kinase N-terminal domain; L-fucokinase; Ribosomal protein S5 domain 2-type fold, subgroup; GHMP kinase, C-terminal domain;	G	KOG4644	L-fucose kinase
A0A1U8E4P5	Clathrin light chain OS=Capsicum annuum OX=4072 GN=T459_23196	T459_23196	25.564	4.3124	18.1	4	4	4	1.016	0.922	0.962	1.019	0.998	1.086	1.07	0.148057	cytoplasm	GO:0045184 establishment of protein localization; GO:0006810 transport; GO:0046907 intracellular transport; GO:0070727 cellular macromolecule localization; GO:0051649 establishment of localization in cell; GO:0016192 vesicle-mediated transport; GO:0006886 intracellular protein transport; GO:0071702 organic substance transport; GO:0008104 protein localization; GO:0033036 macromolecule localization…	GO:0030658 transport vesicle membrane; GO:0016020 membrane; GO:0030130 clathrin coat of trans-Golgi network vesicle; GO:0031410 cytoplasmic vesicle; GO:0031090 organelle membrane; GO:0098796 membrane protein complex; GO:0071944 cell periphery; GO:0031982 vesicle; GO:0030660 Golgi-associated vesicle membrane; GO:0005737 cytoplasm; GO:0044433 cytoplasmic vesicle part; GO:0032991 macromolecular comp…	GO:0005198 structural molecule activity;
A0A1U8E4S2	Thioredoxin-like protein Clot OS=Capsicum annuum OX=4072 GN=T459_33072	T459_33072	14.416	18.432	43.7	7	10	7	1.056	1.034	1.021	0.983	0.969	0.959	0.936	0.0054779	cytoplasm							IPR012336;	Thioredoxin-like fold;	S	KOG3425	Uncharacterized conserved protein
A0A1U8E4S8	1-aminocyclopropane-1-carboxylate oxidase 1 OS=Capsicum annuum OX=4072 GN=T459_23464	T459_23464	35.812	1.3611	14.6	4	12	0									cytoplasm	GO:0044699 single-organism process; GO:0008152 metabolic process; GO:0055114 oxidation-reduction process; GO:0044710 single-organism metabolic process;		GO:0003824 catalytic activity; GO:0016491 oxidoreductase activity;	K05933	E1.14.17.4; aminocyclopropanecarboxylate oxidase [EC:1.14.17.4]	sly01110 Biosynthesis of secondary metabolites - Solanum lycopersicum (tomato); sly00270 Cysteine and methionine metabolism - Solanum lycopersicum (tomato); sly01100 Metabolic pathways - Solanum lycopersicum (tomato);	IPR027443; IPR005123; IPR026992;	Isopenicillin N synthase-like; Oxoglutarate/iron-dependent dioxygenase; Non-haem dioxygenase N-terminal domain;	QR	KOG0143	Iron/ascorbate family oxidoreductases
A0A1U8E4T4	Uncharacterized protein OS=Capsicum annuum OX=4072 GN=T459_23467	T459_23467	24.725	11.937	14	3	3	3	0.878	0.932	1.102	1.109	1.026	1.08	1.104	0.22384	vacuolar membrane	GO:0045184 establishment of protein localization; GO:0006810 transport; GO:0046907 intracellular transport; GO:0070727 cellular macromolecule localization; GO:0051649 establishment of localization in cell; GO:0006886 intracellular protein transport; GO:0071702 organic substance transport; GO:0008104 protein localization; GO:0033036 macromolecule localization; GO:0034613 cellular protein localizat…	GO:0016020 membrane; GO:0043229 intracellular organelle; GO:0005783 endoplasmic reticulum; GO:0005737 cytoplasm; GO:0031224 intrinsic component of membrane; GO:0012505 endomembrane system; GO:0044424 intracellular part; GO:0005623 cell; GO:0016021 integral component of membrane; GO:0043231 intracellular membrane-bounded organelle; GO:0043226 organelle; GO:0005622 intracellular; GO:0044464 cell pa…		K14009	BCAP31; B-cell receptor-associated protein 31	sly04141 Protein processing in endoplasmic reticulum - Solanum lycopersicum (tomato);			V	KOG1962	B-cell receptor-associated protein and related proteins
A0A1U8E502	Mitochondrial uncoupling protein 1 OS=Capsicum annuum OX=4072 GN=T459_23138	T459_23138	32.525	24.678	23.3	7	9	7									cytoplasm	GO:0006810 transport; GO:0051179 localization; GO:0006839 mitochondrial transport; GO:0051234 establishment of localization;	GO:0016020 membrane; GO:0043229 intracellular organelle; GO:0044429 mitochondrial part; GO:0031090 organelle membrane; GO:0005737 cytoplasm; GO:0044446 intracellular organelle part; GO:0031967 organelle envelope; GO:0044424 intracellular part; GO:0005623 cell; GO:0044422 organelle part; GO:0005739 mitochondrion; GO:0005740 mitochondrial envelope; GO:0043231 intracellular membrane-bounded organell…		K15103			IPR023395;	Mitochondrial carrier domain;	C	KOG0753	Mitochondrial fatty acid anion carrier protein/Uncoupling protein
A0A1U8E514	PITH domain-containing protein OS=Capsicum annuum OX=4072 GN=T459_22192	T459_22192	19.646	34.259	21.6	3	4	3	1.047	0.948	0.951	1.039	1.026	0.993	1.038	0.33976	cytoplasm							IPR008979; IPR010400;	Galactose-binding domain-like; PITH domain;	O	KOG0908	Thioredoxin-like protein
A0A1U8E530	Annexin D4 OS=Capsicum annuum OX=4072 GN=T459_22197	T459_22197	36.266	33.471	32.9	11	16	7	1.004	1.074	1	1.015	1.003	0.949	0.964	0.30398	cytoskeleton			GO:0005544 calcium-dependent phospholipid binding; GO:0005488 binding; GO:0005543 phospholipid binding; GO:0043167 ion binding; GO:0008289 lipid binding; GO:0043169 cation binding; GO:0046872 metal ion binding; GO:0043168 anion binding; GO:0005509 calcium ion binding;	K17098					U	KOG0819	Annexin
A0A1U8E553	Uncharacterized protein OS=Capsicum annuum OX=4072 GN=T459_23068	T459_23068	18.525	3.2529	11.6	2	2	1	0.942	1.005	0.906	1.003	1.046	1.099	1.103	0.070001	cytoplasm	GO:0006950 response to stress; GO:0050896 response to stimulus;						IPR006016; IPR014729;	UspA; Rossmann-like alpha/beta/alpha sandwich fold;
A0A1U8E588	Uncharacterized protein OS=Capsicum annuum OX=4072 GN=T459_23747	T459_23747	37.809	2.3418	3.2	1	1	1									chloroplast				K02116
A0A1U8E591	Cysteine synthase OS=Capsicum annuum OX=4072 GN=T459_22258	T459_22258	34.395	21.304	26.9	7	12	6	0.885	0.907	0.88	1.058	1.116	1.105	1.227	0.00040398	nucleus	GO:0000097 sulfur amino acid biosynthetic process; GO:0016053 organic acid biosynthetic process; GO:0044699 single-organism process; GO:0009058 biosynthetic process; GO:1901566 organonitrogen compound biosynthetic process; GO:0044237 cellular metabolic process; GO:0044272 sulfur compound biosynthetic process; GO:0000096 sulfur amino acid metabolic process; GO:0071704 organic substance metabolic p…		GO:0016829 lyase activity; GO:0004124 cysteine synthase activity; GO:0003824 catalytic activity; GO:0016835 carbon-oxygen lyase activity;	K01738	cysK; cysteine synthase [EC:2.5.1.47]	sly00920 Sulfur metabolism - Solanum lycopersicum (tomato); sly01110 Biosynthesis of secondary metabolites - Solanum lycopersicum (tomato); sly00270 Cysteine and methionine metabolism - Solanum lycopersicum (tomato); sly01200 Carbon metabolism - Solanum lycopersicum (tomato); sly01230 Biosynthesis of amino acids - Solanum lycopersicum (tomato); sly01100 Metabolic pathways - Solanum lycopersicum (…	IPR001926;	Tryptophan synthase beta subunit-like PLP-dependent enzyme;	E	KOG1252	Cystathionine beta-synthase and related enzymes
A0A1U8E5A0	Uncharacterized protein OS=Capsicum annuum OX=4072 GN=T459_32467	T459_32467	53.826	1.8962	2.7	1	1	1									nucleus			GO:0097159 organic cyclic compound binding; GO:1901363 heterocyclic compound binding; GO:1901265 nucleoside phosphate binding; GO:0005488 binding; GO:0003676 nucleic acid binding; GO:0000166 nucleotide binding; GO:0036094 small molecule binding;	K14328	UPF3; regulator of nonsense transcripts 3	sly03015 mRNA surveillance pathway - Solanum lycopersicum (tomato); sly03013 RNA transport - Solanum lycopersicum (tomato);	IPR000504; IPR012677; IPR005120;	RNA recognition motif domain; Nucleotide-binding alpha-beta plait domain; Regulator of nonsense-mediated decay, UPF3;	A	KOG1295	Nonsense-mediated decay protein Upf3
A0A1U8E5A6	60S ribosome subunit biogenesis protein NIP7 homolog OS=Capsicum annuum OX=4072 GN=T459_22278	T459_22278	20.925	2.4413	9.1	1	1	1	0.761	0.76	1.1	0.894	1.125	1.349	1.285	0.21432	cytoplasm	GO:0044085 cellular component biogenesis; GO:0016043 cellular component organization; GO:0034622 cellular macromolecular complex assembly; GO:0022613 ribonucleoprotein complex biogenesis; GO:0022618 ribonucleoprotein complex assembly; GO:0042254 ribosome biogenesis; GO:0042255 ribosome assembly; GO:0043933 macromolecular complex subunit organization; GO:0071826 ribonucleoprotein complex subunit o…	GO:0043226 organelle; GO:0043231 intracellular membrane-bounded organelle; GO:0043229 intracellular organelle; GO:0005634 nucleus; GO:0044464 cell part; GO:0005622 intracellular; GO:0044424 intracellular part; GO:0043227 membrane-bounded organelle; GO:0005623 cell;	GO:0097159 organic cyclic compound binding; GO:1901363 heterocyclic compound binding; GO:0003723 RNA binding; GO:0005488 binding; GO:0003676 nucleic acid binding;	K07565			IPR015947; IPR002478;	PUA-like domain; PUA domain;	J	KOG3492	Ribosome biogenesis protein NIP7
A0A1U8E5A8	50S ribosomal protein L13 OS=Capsicum annuum OX=4072 GN=T459_23835	T459_23835	27.18	12.409	28.9	7	13	4	1.081	1.09	1.072	0.956	0.951	0.961	0.884	2.3476e-05	chloroplast	GO:0006518 peptide metabolic process; GO:0043043 peptide biosynthetic process; GO:0044267 cellular protein metabolic process; GO:0006807 nitrogen compound metabolic process; GO:0009058 biosynthetic process; GO:0043603 cellular amide metabolic process; GO:0044238 primary metabolic process; GO:1901566 organonitrogen compound biosynthetic process; GO:1901576 organic substance biosynthetic process; G…	GO:0005840 ribosome; GO:0043226 organelle; GO:0043229 intracellular organelle; GO:0043232 intracellular non-membrane-bounded organelle; GO:0044464 cell part; GO:0005622 intracellular; GO:0005737 cytoplasm; GO:0032991 macromolecular complex; GO:0044424 intracellular part; GO:1990904 ribonucleoprotein complex; GO:0005623 cell; GO:0030529 intracellular ribonucleoprotein complex; GO:0044444 cytoplasm…	GO:0003735 structural constituent of ribosome; GO:0005198 structural molecule activity;	K02871	RP-L13; large subunit ribosomal protein L13	sly03010 Ribosome - Solanum lycopersicum (tomato);			J	KOG3203	Mitochondrial/chloroplast ribosomal protein L13
A0A1U8E5B1	YTH domain-containing family protein 1 OS=Capsicum annuum OX=4072 GN=T459_32457	T459_32457	63.375	9.4013	9.1	4	4	4	0.87	0.852	0.81	1.19	1.121	1.148	1.366	0.00033965	nucleus			GO:0097159 organic cyclic compound binding; GO:1901363 heterocyclic compound binding; GO:0003723 RNA binding; GO:0005488 binding; GO:0003676 nucleic acid binding;	K20102			IPR007275;	YTH domain;	R	KOG1901	Uncharacterized high-glucose-regulated protein
A0A1U8E5B7	Soluble inorganic pyrophosphatase 4 OS=Capsicum annuum OX=4072 GN=T459_22857	T459_22857	24.577	35.051	25.9	5	11	3	0.822	0.848	0.847	1.163	1.162	1.147	1.379	4.2633e-06	cytoplasm	GO:0008152 metabolic process; GO:0044237 cellular metabolic process; GO:0006793 phosphorus metabolic process; GO:0009987 cellular process; GO:0006796 phosphate-containing compound metabolic process;	GO:0044424 intracellular part; GO:0005623 cell; GO:0044464 cell part; GO:0005622 intracellular; GO:0005737 cytoplasm;	GO:0000287 magnesium ion binding; GO:0004427 inorganic diphosphatase activity; GO:0016462 pyrophosphatase activity; GO:0003824 catalytic activity; GO:0005488 binding; GO:0043167 ion binding; GO:0046872 metal ion binding; GO:0043169 cation binding; GO:0016817 hydrolase activity, acting on acid anhydrides; GO:0016787 hydrolase activity; GO:0016818 hydrolase activity, acting on acid anhydrides, in p…	K01507	ppa; inorganic pyrophosphatase [EC:3.6.1.1]	sly00190 Oxidative phosphorylation - Solanum lycopersicum (tomato);			C	KOG1626	Inorganic pyrophosphatase/Nucleosome remodeling factor, subunit NURF38
A0A1U8E5D6	"UPF0603 protein, chloroplastic OS=Capsicum annuum OX=4072 GN=T459_22341"	T459_22341	31.741	129.26	40.5	10	39	10	1.007	0.985	1.028	0.986	1.028	1.014	1.003	0.88646	chloroplast							IPR007621;	TPM domain;
A0A1U8E5E4	"Thioredoxin-like protein AAED1, chloroplastic OS=Capsicum annuum OX=4072 GN=T459_22823"	T459_22823	30.522	19.634	27.1	7	9	7	1.042	0.984	1.038	0.97	0.989	0.978	0.959	0.095241	chloroplast							IPR012336;	Thioredoxin-like fold;	S	KOG4498	Uncharacterized conserved protein
A0A1U8E5E7	"ATP phosphoribosyltransferase 1, chloroplastic OS=Capsicum annuum OX=4072 GN=T459_32435"	T459_32435	43.18	41.448	33	13	22	13	1.025	1.016	1	0.965	1.008	0.973	0.969	0.104023	chloroplast	GO:0006725 cellular aromatic compound metabolic process; GO:0016053 organic acid biosynthetic process; GO:0052803 imidazole-containing compound metabolic process; GO:0044699 single-organism process; GO:0009058 biosynthetic process; GO:0000105 histidine biosynthetic process; GO:1901566 organonitrogen compound biosynthetic process; GO:0044237 cellular metabolic process; GO:0071704 organic substance…	GO:0044424 intracellular part; GO:0005623 cell; GO:0044464 cell part; GO:0005622 intracellular; GO:0005737 cytoplasm;	GO:0000287 magnesium ion binding; GO:0016763 transferase activity, transferring pentosyl groups; GO:0003879 ATP phosphoribosyltransferase activity; GO:0003824 catalytic activity; GO:0005488 binding; GO:0043167 ion binding; GO:0046872 metal ion binding; GO:0043169 cation binding; GO:0016757 transferase activity, transferring glycosyl groups; GO:0016740 transferase activity;	K00765	hisG; ATP phosphoribosyltransferase [EC:2.4.2.17]	sly01110 Biosynthesis of secondary metabolites - Solanum lycopersicum (tomato); sly00340 Histidine metabolism - Solanum lycopersicum (tomato); sly01230 Biosynthesis of amino acids - Solanum lycopersicum (tomato); sly01100 Metabolic pathways - Solanum lycopersicum (tomato);	IPR015867; IPR013820; IPR013115; IPR011322;	Nitrogen regulatory protein PII/ATP phosphoribosyltransferase, C-terminal; ATP phosphoribosyltransferase, catalytic domain; Histidine biosynthesis HisG, C-terminal; Nitrogen regulatory PII-like, alpha/beta;	E	KOG2831	ATP phosphoribosyltransferase
A0A1U8E5G1	Tryptophan synthase alpha chain OS=Capsicum annuum OX=4072 GN=T459_34889	T459_34889	33.76	7.7039	9.8	2	3	2	1.042	0.978	0.978	1.006	1.044	0.978	1.01	0.74094	chloroplast	GO:0044106 cellular amine metabolic process; GO:0009072 aromatic amino acid family metabolic process; GO:0006725 cellular aromatic compound metabolic process; GO:0044281 small molecule metabolic process; GO:0044763 single-organism cellular process; GO:0006807 nitrogen compound metabolic process; GO:1901360 organic cyclic compound metabolic process; GO:0044699 single-organism process; GO:0044238 p…		GO:0016829 lyase activity; GO:0016836 hydro-lyase activity; GO:0004834 tryptophan synthase activity; GO:0003824 catalytic activity; GO:0016835 carbon-oxygen lyase activity;	K01695	trpA; tryptophan synthase alpha chain [EC:4.2.1.20]	sly00400 Phenylalanine, tyrosine and tryptophan biosynthesis - Solanum lycopersicum (tomato); sly00260 Glycine, serine and threonine metabolism - Solanum lycopersicum (tomato); sly01110 Biosynthesis of secondary metabolites - Solanum lycopersicum (tomato); sly01230 Biosynthesis of amino acids - Solanum lycopersicum (tomato); sly01100 Metabolic pathways - Solanum lycopersicum (tomato);	IPR013785; IPR011060;	Aldolase-type TIM barrel; Ribulose-phosphate binding barrel;	E	KOG4175	Tryptophan synthase alpha chain
A0A1U8E5I6	Uncharacterized protein OS=Capsicum annuum OX=4072 GN=T459_22786	T459_22786	31.305	2.0613	3.2	1	1	1	1.057	0.851	0.949	0.981	1.028	1.13	1.099	0.26922	chloroplast	GO:0044085 cellular component biogenesis; GO:0016043 cellular component organization; GO:0034622 cellular macromolecular complex assembly; GO:0071822 protein complex subunit organization; GO:0017004 cytochrome complex assembly; GO:0044267 cellular protein metabolic process; GO:0017006 protein-tetrapyrrole linkage; GO:0044238 primary metabolic process; GO:0044237 cellular metabolic process; GO:004…	GO:0016020 membrane; GO:0005623 cell; GO:0044464 cell part; GO:0071944 cell periphery; GO:0005886 plasma membrane;
A0A1U8E5I9	Pectate lyase OS=Capsicum annuum OX=4072 GN=T459_22779	T459_22779	40.035	2.8337	5.9	2	2	2	0.951	0.997	0.978	1.016	1.031	1.03	1.052	0.025357	nucleus				K01728	pel; pectate lyase [EC:4.2.2.2]	sly00040 Pentose and glucuronate interconversions - Solanum lycopersicum (tomato);	IPR011050; IPR002022; IPR012334;	Pectin lyase fold/virulence factor; Pectate lyase/Amb allergen; Pectin lyase fold;
A0A1U8E5K5	"Short-chain dehydrogenase TIC 32, chloroplastic OS=Capsicum annuum OX=4072 GN=T459_22928"	T459_22928	35.135	4.3117	6.6	2	2	2	0.9	0.853	1.021	1.135	0.937	1.162	1.166	0.154276	mitochondria				K11153			IPR016040;	NAD(P)-binding domain;	Q	KOG1208	Dehydrogenases with different specificities (related to short-chain alcohol dehydrogenases)
A0A1U8E5M7	Uncharacterized protein OS=Capsicum annuum OX=4072 GN=T459_22916	T459_22916	34.795	67.97	17.5	4	4	4	0.964	0.986	0.981	1.046	1.008	1.021	1.049	0.020215	nucleus			GO:0097159 organic cyclic compound binding; GO:1901363 heterocyclic compound binding; GO:0030151 molybdenum ion binding; GO:0046914 transition metal ion binding; GO:0003824 catalytic activity; GO:0005488 binding; GO:0043167 ion binding; GO:0046872 metal ion binding; GO:0043169 cation binding; GO:0043168 anion binding; GO:0048037 cofactor binding; GO:0030170 pyridoxal phosphate binding;				IPR011037; IPR005303; IPR005302;	Pyruvate kinase-like, insert domain; MOSC, N-terminal beta barrel; Molybdenum cofactor sulfurase, C-terminal;	R	KOG2362	Uncharacterized Fe-S protein
A0A1U8E5R0	Putative ADP-ribosylation factor GTPase-activating protein AGD6 OS=Capsicum annuum OX=4072 GN=T459_22898	T459_22898	49.899	2.2716	4.8	2	2	2									nucleus			GO:0098772 molecular function regulator; GO:0030234 enzyme regulator activity; GO:0008047 enzyme activator activity; GO:0060589 nucleoside-triphosphatase regulator activity; GO:0005096 GTPase activator activity; GO:0030695 GTPase regulator activity;	K12492	ARFGAP1; ADP-ribosylation factor GTPase-activating protein 1	sly04144 Endocytosis - Solanum lycopersicum (tomato);			TUZ	KOG0704	ADP-ribosylation factor GTPase activator
A0A1U8E5R6	D-xylose-proton symporter-like 1 OS=Capsicum annuum OX=4072 GN=T459_23629	T459_23629	59.693	14.1	7.5	3	7	3	1.035	0.998	1.041	0.984	0.962	0.983	0.953	0.033304	chloroplast	GO:0006810 transport; GO:0055085 transmembrane transport; GO:0051179 localization; GO:0051234 establishment of localization;	GO:0031224 intrinsic component of membrane; GO:0016020 membrane; GO:0016021 integral component of membrane; GO:0044425 membrane part;	GO:0022892 substrate-specific transporter activity; GO:0022891 substrate-specific transmembrane transporter activity; GO:0022857 transmembrane transporter activity; GO:0005215 transporter activity;				IPR020846;	Major facilitator superfamily domain;	R	KOG0254	Predicted transporter (major facilitator superfamily)
A0A1U8E5T6	Uncharacterized protein OS=Capsicum annuum OX=4072 GN=T459_22995	T459_22995	8.716	3.0142	16.4	1	1	1	1.087	0.845	1.002	1.05	1.021	0.994	1.045	0.5547	chloroplast
A0A1U8E5U8	ATP-citrate synthase alpha chain protein 2 OS=Capsicum annuum OX=4072 GN=T459_27657	T459_27657	46.624	1.2336	6.6	3	5	1									cytoplasm			GO:0005524 ATP binding; GO:1901265 nucleoside phosphate binding; GO:0001882 nucleoside binding; GO:0043167 ion binding; GO:0000166 nucleotide binding; GO:0097159 organic cyclic compound binding; GO:1901363 heterocyclic compound binding; GO:0032549 ribonucleoside binding; GO:0097367 carbohydrate derivative binding; GO:0032553 ribonucleotide binding; GO:0005488 binding; GO:0032550 purine ribonucleo…	K01648	ACLY; ATP citrate (pro-S)-lyase [EC:2.3.3.8]	sly01110 Biosynthesis of secondary metabolites - Solanum lycopersicum (tomato); sly01100 Metabolic pathways - Solanum lycopersicum (tomato); sly00020 Citrate cycle (TCA cycle) - Solanum lycopersicum (tomato);	IPR032263; IPR013816; IPR013650; IPR016102;	ATP-citrate synthase, citrate-binding domain; ATP-grasp fold, subdomain 2; ATP-grasp fold, succinyl-CoA synthetase-type; Succinyl-CoA synthetase-like;	C	KOG1254	ATP-citrate lyase
A0A1U8E5V9	Uncharacterized protein OS=Capsicum annuum OX=4072 GN=T459_23656	T459_23656	36.42	30.95	9.1	3	6	3	1.017	1.048	1.043	0.954	0.968	0.943	0.922	0.0024649	chloroplast		GO:0016020 membrane;							S	KOG4267	Predicted membrane protein
A0A1U8E5W4	Uncharacterized protein OS=Capsicum annuum OX=4072 GN=T459_34118	T459_34118	13.739	38.296	13.3	1	1	1	1.384	1.366	1.314	0.675	0.593	0.718	0.489	0.00025569	cytoplasm
A0A1U8E600	Uncharacterized protein OS=Capsicum annuum OX=4072 GN=T459_32024	T459_32024	30.935	12.32	17.3	4	4	4	0.914	0.933	0.956	1.091	1.057	1.049	1.141	0.00174409	chloroplast			GO:0003824 catalytic activity;	K17506			IPR001932;	PPM-type phosphatase domain;	T	KOG0698	Serine/threonine protein phosphatase
A0A1U8E601	"Lipid phosphate phosphatase gamma, chloroplastic OS=Capsicum annuum OX=4072 GN=T459_22725"	T459_22725	25.62	1.4676	7.6	2	2	2	0.996	1.059	1.012	1.035	0.91	1.004	0.962	0.40046	plasma membrane				K07252	E3.6.1.43; dolichyldiphosphatase [EC:3.6.1.43]	sly00510 N-Glycan biosynthesis - Solanum lycopersicum (tomato);	IPR000326;	Phosphatidic acid phosphatase type 2/haloperoxidase;	I	KOG3146	Dolichyl pyrophosphate phosphatase and related acid phosphatases
A0A1U8E669	Uncharacterized protein OS=Capsicum annuum OX=4072 GN=T459_30067	T459_30067	21.585	1.8646	10.6	2	2	2									nucleus			GO:0016787 hydrolase activity; GO:0003824 catalytic activity; GO:0042578 phosphoric ester hydrolase activity; GO:0016791 phosphatase activity; GO:0016788 hydrolase activity, acting on ester bonds;	K17619			IPR010033; IPR023214;	HAD-superfamily phosphatase, subfamily IIIC; HAD-like domain;	R	KOG4549	Magnesium-dependent phosphatase
A0A1U8E671	Cytokinin riboside 5'-monophosphate phosphoribohydrolase OS=Capsicum annuum OX=4072 GN=T459_22622	T459_22622	23.99	2.8281	8.7	2	2	2	0.695	0.723	0.76	1.104	1.467	1.211	1.736	0.0033959	cytoplasm				K22522
A0A1U8E675	Uncharacterized protein OS=Capsicum annuum OX=4072 GN=T459_31950	T459_31950	43.733	24.622	20	7	11	7	1.038	0.962	1.004	1.018	1.008	0.963	0.995	0.87128	chloroplast	GO:0008152 metabolic process; GO:0005975 carbohydrate metabolic process; GO:0044238 primary metabolic process; GO:0071704 organic substance metabolic process;		GO:0019203 carbohydrate phosphatase activity; GO:0003824 catalytic activity; GO:0042578 phosphoric ester hydrolase activity; GO:0016791 phosphatase activity; GO:0016788 hydrolase activity, acting on ester bonds; GO:0016787 hydrolase activity; GO:0050308 sugar-phosphatase activity; GO:0042132 fructose 1,6-bisphosphate 1-phosphatase activity;	K03841	FBP; fructose-1,6-bisphosphatase I [EC:3.1.3.11]	sly01110 Biosynthesis of secondary metabolites - Solanum lycopersicum (tomato); sly01200 Carbon metabolism - Solanum lycopersicum (tomato); sly00710 Carbon fixation in photosynthetic organisms - Solanum lycopersicum (tomato); sly00051 Fructose and mannose metabolism - Solanum lycopersicum (tomato); sly00010 Glycolysis / Gluconeogenesis - Solanum lycopersicum (tomato); sly01100 Metabolic pathways …	IPR033391;	Fructose-1-6-bisphosphatase class I, N-terminal;	G	KOG1458	Fructose-1,6-bisphosphatase
A0A1U8E6E6	Peptidyl-prolyl cis-trans isomerase OS=Capsicum annuum OX=4072 GN=T459_22552	T459_22552	26.863	17.828	12.7	2	2	1	0.885	1.007	0.909	1.069	0.989	1.149	1.145	0.082198	chloroplast	GO:0044267 cellular protein metabolic process; GO:0044238 primary metabolic process; GO:0018208 peptidyl-proline modification; GO:0000413 protein peptidyl-prolyl isomerization; GO:0044237 cellular metabolic process; GO:0071704 organic substance metabolic process; GO:0006457 protein folding; GO:0018193 peptidyl-amino acid modification; GO:0008152 metabolic process; GO:0044260 cellular macromolecul…		GO:0003755 peptidyl-prolyl cis-trans isomerase activity; GO:0016853 isomerase activity; GO:0003824 catalytic activity; GO:0016859 cis-trans isomerase activity;	K12736			IPR002130; IPR029000;	Cyclophilin-type peptidyl-prolyl cis-trans isomerase domain; Cyclophilin-like domain;	O	KOG0882	Cyclophilin-related peptidyl-prolyl cis-trans isomerase
A0A1U8E6G6	Endoglucanase OS=Capsicum annuum OX=4072 GN=T459_33952	T459_33952	68.612	1.3731	1.8	1	1	1									chloroplast	GO:0008152 metabolic process; GO:0005975 carbohydrate metabolic process; GO:0044238 primary metabolic process; GO:0071704 organic substance metabolic process;		GO:0004553 hydrolase activity, hydrolyzing O-glycosyl compounds; GO:0016787 hydrolase activity; GO:0003824 catalytic activity; GO:0016798 hydrolase activity, acting on glycosyl bonds;	K01179	E3.2.1.4; endoglucanase [EC:3.2.1.4]	sly00500 Starch and sucrose metabolism - Solanum lycopersicum (tomato); sly01100 Metabolic pathways - Solanum lycopersicum (tomato);	IPR012341; IPR008928;	Six-hairpin glycosidase; Six-hairpin glycosidase-like;
A0A1U8E6I5	"Peptidyl-prolyl cis-trans isomerase FKBP16-4, chloroplastic OS=Capsicum annuum OX=4072 GN=T459_22512"	T459_22512	25.013	35.233	44.6	9	17	9	0.983	0.991	1.009	1.011	0.987	0.997	1.004	0.71824	chloroplast							IPR001179;	FKBP-type peptidyl-prolyl cis-trans isomerase domain;	O	KOG0552	FKBP-type peptidyl-prolyl cis-trans isomerase
A0A1U8E6J2	NADH dehydrogenase [ubiquinone] 1 beta subcomplex subunit 3-A OS=Capsicum annuum OX=4072 GN=T459_33931	T459_33931	7.6977	2.1795	17.6	1	1	1	1.041	0.921	0.996	1.042	1.045	0.954	1.028	0.57992	nucleus	GO:0008152 metabolic process; GO:0006091 generation of precursor metabolites and energy; GO:0044710 single-organism metabolic process; GO:0055114 oxidation-reduction process; GO:0044763 single-organism cellular process; GO:0022900 electron transport chain; GO:0044699 single-organism process; GO:0044237 cellular metabolic process; GO:0009987 cellular process;	GO:0016020 membrane; GO:0098800 inner mitochondrial membrane protein complex; GO:0031090 organelle membrane; GO:0098796 membrane protein complex; GO:0005737 cytoplasm; GO:0032991 macromolecular complex; GO:0045271 respiratory chain complex I; GO:0098798 mitochondrial protein complex; GO:0044424 intracellular part; GO:0005747 mitochondrial respiratory chain complex I; GO:0005623 cell; GO:0044455 m…
A0A1U8E6L2	Uncharacterized protein OS=Capsicum annuum OX=4072 GN=T459_32512	T459_32512	67.621	4.0615	3.6	2	2	2	0.992	0.967	0.981	1.06	1.046	0.956	1.041	0.29892	chloroplast	GO:0044699 single-organism process; GO:0008152 metabolic process; GO:0055114 oxidation-reduction process; GO:0044710 single-organism metabolic process;		GO:0003824 catalytic activity; GO:0016491 oxidoreductase activity;				IPR023753;	FAD/NAD(P)-binding domain;
A0A1U8E6L7	Cullin-associated NEDD8-dissociated protein 1 OS=Capsicum annuum OX=4072 GN=T459_32507	T459_32507	134.79	35.246	14	16	18	16	0.995	1.004	1.015	1.019	0.981	0.988	0.991	0.53722	nucleus			GO:0005488 binding;	K17263			IPR011989; IPR016024; IPR013932;	Armadillo-like helical; Armadillo-type fold; TATA-binding protein interacting (TIP20);	R	KOG1824	TATA-binding protein-interacting protein
A0A1U8E6M6	18.5 kDa class I heat shock protein OS=Capsicum annuum OX=4072 GN=T459_32218	T459_32218	18.122	-2	27.7	4	11	1	0.136	0.113	0.108	1.892	1.778	1.888	15.569	1.5158e-06	cytoplasm				K13993	HSP20; HSP20 family protein	sly04141 Protein processing in endoplasmic reticulum - Solanum lycopersicum (tomato);	IPR002068; IPR008978;	Alpha crystallin/Hsp20 domain; HSP20-like chaperone;	O	KOG0710	Molecular chaperone (small heat-shock protein Hsp26/Hsp42)
A0A1U8E6P9	Ras-related protein YPTC6 OS=Capsicum annuum OX=4072 GN=T459_32472	T459_32472	23.786	108.32	43.5	8	11	6	0.908	0.905	0.961	1.077	1.104	1.073	1.173	0.00172322	chloroplast	GO:0050794 regulation of cellular process; GO:0044700 single organism signaling; GO:0051716 cellular response to stimulus; GO:0007165 signal transduction; GO:0050789 regulation of biological process; GO:0007154 cell communication; GO:0035556 intracellular signal transduction; GO:0044699 single-organism process; GO:0007264 small GTPase mediated signal transduction; GO:0023052 signaling; GO:0050896…		GO:1901265 nucleoside phosphate binding; GO:0001882 nucleoside binding; GO:0043167 ion binding; GO:0000166 nucleotide binding; GO:0097159 organic cyclic compound binding; GO:1901363 heterocyclic compound binding; GO:0032549 ribonucleoside binding; GO:0097367 carbohydrate derivative binding; GO:0032553 ribonucleotide binding; GO:0005488 binding; GO:0032550 purine ribonucleoside binding; GO:0043168…	K07904	RAB11A; Ras-related protein Rab-11A	sly04144 Endocytosis - Solanum lycopersicum (tomato);	IPR005225; IPR027417;	Small GTP-binding protein domain; P-loop containing nucleoside triphosphate hydrolase;	U	KOG0087	GTPase Rab11/YPT3, small G protein superfamily
A0A1U8E6Q9	"Heat shock 70 kDa protein 7, chloroplastic OS=Capsicum annuum OX=4072 GN=T459_32464"	T459_32464	75.277	323.31	51.3	38	97	29	0.996	0.965	0.974	1.013	1.026	1.027	1.045	0.0135192	chloroplast	GO:0006457 protein folding; GO:0009987 cellular process;		GO:0005524 ATP binding; GO:1901265 nucleoside phosphate binding; GO:0001882 nucleoside binding; GO:0043167 ion binding; GO:0005515 protein binding; GO:0000166 nucleotide binding; GO:0097159 organic cyclic compound binding; GO:1901363 heterocyclic compound binding; GO:0032549 ribonucleoside binding; GO:0097367 carbohydrate derivative binding; GO:0032553 ribonucleotide binding; GO:0005488 binding; …	K03283	HSPA1s; heat shock 70kDa protein 1/2/6/8	sly03040 Spliceosome - Solanum lycopersicum (tomato); sly04144 Endocytosis - Solanum lycopersicum (tomato); sly04141 Protein processing in endoplasmic reticulum - Solanum lycopersicum (tomato);	IPR029048; IPR029047;	Heat shock protein 70kD, C-terminal domain; Heat shock protein 70kD, peptide-binding domain;	O	KOG0102	Molecular chaperones mortalin/PBP74/GRP75, HSP70 superfamily
A0A1U8E6U2	Sucrose nonfermenting 4-like protein OS=Capsicum annuum OX=4072 GN=T459_02939	T459_02939	53.396	4.2921	4.6	2	2	2									cytoplasm							IPR014756; IPR000644; IPR032640;	Immunoglobulin E-set; CBS domain; AMP-activated protein kinase, glycogen-binding domain;	C	KOG1764	5'-AMP-activated protein kinase, gamma subunit
A0A1U8E6Y3	"Thioredoxin M3, chloroplastic OS=Capsicum annuum OX=4072 GN=T459_33046"	T459_33046	20.183	14.196	16.7	3	6	3	1.01	1.057	0.982	1.016	0.936	1.019	0.974	0.49704	chloroplast	GO:0050794 regulation of cellular process; GO:0042592 homeostatic process; GO:0065008 regulation of biological quality; GO:0050789 regulation of biological process; GO:0045454 cell redox homeostasis; GO:0044763 single-organism cellular process; GO:0019725 cellular homeostasis; GO:0044699 single-organism process; GO:0009987 cellular process; GO:0065007 biological regulation;			K03671			IPR013766; IPR012336;	Thioredoxin domain; Thioredoxin-like fold;	O	KOG0910	Thioredoxin-like protein
A0A1U8E721	V-type proton ATPase subunit D OS=Capsicum annuum OX=4072 GN=T459_03025	T459_03025	29.098	1.29	41.8	13	16	1									chloroplast			GO:0022804 active transmembrane transporter activity; GO:0015399 primary active transmembrane transporter activity; GO:0016817 hydrolase activity, acting on acid anhydrides; GO:0016787 hydrolase activity; GO:0017111 nucleoside-triphosphatase activity; GO:0016887 ATPase activity; GO:0015405 P-P-bond-hydrolysis-driven transmembrane transporter activity; GO:0016462 pyrophosphatase activity; GO:00426…	K02149	ATPeV1D; V-type H+-transporting ATPase subunit D	sly00190 Oxidative phosphorylation - Solanum lycopersicum (tomato); sly04145 Phagosome - Solanum lycopersicum (tomato); sly01100 Metabolic pathways - Solanum lycopersicum (tomato);			C	KOG1647	Vacuolar H+-ATPase V1 sector, subunit D
A0A1U8E723	Carboxypeptidase OS=Capsicum annuum OX=4072 GN=T459_31699	T459_31699	55.45	24.304	14.8	6	9	6	1.01	1.03	1.006	0.95	1.027	0.984	0.972	0.29144	peroxisome	GO:0006508 proteolysis; GO:0008152 metabolic process; GO:0043170 macromolecule metabolic process; GO:0019538 protein metabolic process; GO:0044238 primary metabolic process; GO:0071704 organic substance metabolic process;		GO:0004180 carboxypeptidase activity; GO:0008233 peptidase activity; GO:0008238 exopeptidase activity; GO:0003824 catalytic activity; GO:0017171 serine hydrolase activity; GO:0008236 serine-type peptidase activity; GO:0070011 peptidase activity, acting on L-amino acid peptides; GO:0016787 hydrolase activity; GO:0004185 serine-type carboxypeptidase activity; GO:0070008 serine-type exopeptidase act…	K16297			IPR029058;	Alpha/Beta hydrolase fold;	OE	KOG1282	Serine carboxypeptidases (lysosomal cathepsin A)
A0A1U8E727	Uncharacterized protein OS=Capsicum annuum OX=4072 GN=T459_25635	T459_25635	14	18.998	22.2	3	8	3	1.089	1.108	1.109	0.932	0.869	0.922	0.824	0.00099706	chloroplast			GO:0005515 protein binding; GO:0051082 unfolded protein binding; GO:0031072 heat shock protein binding; GO:0005488 binding;				IPR001305;	Heat shock protein DnaJ, cysteine-rich domain;
A0A1U8E731	Actin OS=Capsicum annuum OX=4072 GN=T459_25669	T459_25669	41.67	14.104	33.4	8	36	1	0.876	1.038	1.266	0.792	0.98	1.061	0.891	0.46276	cytoskeleton				K10355					Z	KOG0676	Actin and related proteins
A0A1U8E755	Amidase 1 OS=Capsicum annuum OX=4072 GN=T459_25753	T459_25753	45.938	6.5771	7.6	3	3	3	0.992	0.926	1.013	1.043	1.021	1.008	1.048	0.174696	cytoplasm				K01426	E3.5.1.4; amidase [EC:3.5.1.4]	sly00380 Tryptophan metabolism - Solanum lycopersicum (tomato); sly00330 Arginine and proline metabolism - Solanum lycopersicum (tomato); sly00360 Phenylalanine metabolism - Solanum lycopersicum (tomato);	IPR023631;	Amidase signature domain;	J	KOG1211	Amidases
A0A1U8E762	Ethylene-responsive proteinase inhibitor 1 OS=Capsicum annuum OX=4072 GN=T459_25745	T459_25745	11.871	4.1481	14	1	1	1	0.879	1.118	1.126	0.883	1.043	0.961	0.924	0.47496	extracellular	GO:0009611 response to wounding; GO:0050896 response to stimulus; GO:0006950 response to stress;		GO:0004867 serine-type endopeptidase inhibitor activity; GO:0030234 enzyme regulator activity; GO:0030414 peptidase inhibitor activity; GO:0061134 peptidase regulator activity; GO:0061135 endopeptidase regulator activity; GO:0098772 molecular function regulator; GO:0004857 enzyme inhibitor activity; GO:0004866 endopeptidase inhibitor activity;
A0A1U8E7C4	Uncharacterized protein OS=Capsicum annuum OX=4072 GN=T459_31793	T459_31793	83.212	7.6074	7.9	5	5	5	0.969	1.013	0.903	1.069	1.047	1.001	1.08	0.113662	cytoplasm			GO:0005515 protein binding; GO:0005488 binding;	K14018	PLAA; phospholipase A-2-activating protein	sly04141 Protein processing in endoplasmic reticulum - Solanum lycopersicum (tomato);	IPR015155; IPR017986; IPR015943; IPR013535;	PLAA family ubiquitin binding, PFU; WD40-repeat-containing domain; WD40/YVTN repeat-like-containing domain; PUL domain;	I	KOG0301	Phospholipase A2-activating protein (contains WD40 repeats)
A0A1U8E7D5	Tubulin-specific chaperone A OS=Capsicum annuum OX=4072 GN=T459_02635	T459_02635	12.932	9.0799	47.8	7	7	7	1.056	1.085	1.053	0.969	0.929	0.927	0.884	0.0020762	mitochondria	GO:0044085 cellular component biogenesis; GO:0016043 cellular component organization; GO:0034622 cellular macromolecular complex assembly; GO:0071822 protein complex subunit organization; GO:0007021 tubulin complex assembly; GO:0043933 macromolecular complex subunit organization; GO:0006457 protein folding; GO:0022607 cellular component assembly; GO:0065003 macromolecular complex assembly; GO:007…		GO:0015631 tubulin binding; GO:0048487 beta-tubulin binding; GO:0005515 protein binding; GO:0008092 cytoskeletal protein binding; GO:0005488 binding;	K17292					O	KOG3470	Beta-tubulin folding cofactor A
A0A1U8E7F1	Putative glutathione S-transferase OS=Capsicum annuum OX=4072 GN=T459_23071	T459_23071	25.308	9.5514	16.1	3	6	2	0.728	0.815	0.702	1.257	1.26	1.218	1.664	0.00038072	chloroplast			GO:0005515 protein binding; GO:0005488 binding;	K00799	GST; glutathione S-transferase [EC:2.5.1.18]	sly00480 Glutathione metabolism - Solanum lycopersicum (tomato);	IPR004046; IPR010987; IPR012336; IPR004045;	Glutathione S-transferase, C-terminal; Glutathione S-transferase, C-terminal-like; Thioredoxin-like fold; Glutathione S-transferase, N-terminal;	O	KOG0406	Glutathione S-transferase
A0A1U8E7M0	Protein LURP-one-related 15 OS=Capsicum annuum OX=4072 GN=T459_25832	T459_25832	23.672	6.7247	7.6	1	1	1	0.701	0.874	0.818	1.126	1.181	1.287	1.502	0.0057822	nucleus							IPR025659; IPR007612;	Tubby C-terminal-like domain; LURP1-related protein domain;
A0A1U8E7M2	Uncharacterized protein OS=Capsicum annuum OX=4072 GN=T459_30068	T459_30068	22.526	24.281	13.1	3	5	3	0.968	0.967	0.988	1.056	0.979	1.052	1.056	0.102424	plasma membrane
A0A1U8E7N6	NADH dehydrogenase [ubiquinone] 1 beta subcomplex subunit 9 OS=Capsicum annuum OX=4072 GN=T459_01412	T459_01412	13.868	14.682	47.1	5	8	5	1.014	1.005	1.055	0.93	0.979	0.998	0.946	0.095559	mitochondria				K03965	NDUFB9; NADH dehydrogenase (ubiquinone) 1 beta subcomplex subunit 9	sly00190 Oxidative phosphorylation - Solanum lycopersicum (tomato); sly01100 Metabolic pathways - Solanum lycopersicum (tomato);			C	KOG3466	NADH:ubiquinone oxidoreductase, NDUFB9/B22 subunit
A0A1U8E7P7	Uncharacterized protein OS=Capsicum annuum OX=4072 GN=T459_31927	T459_31927	47.596	1.7504	3	1	2	1	0.811	0.826	0.791	1.133	1.112	1.317	1.467	0.0022957	chloroplast
A0A1U8E7S7	"Heat shock 70 kDa protein, mitochondrial OS=Capsicum annuum OX=4072 GN=T459_31907"	T459_31907	73.075	6.8645	32.8	22	38	5	1.009	0.999	0.973	1.018	0.996	1.012	1.015	0.29976	mitochondria	GO:0006457 protein folding; GO:0009987 cellular process;		GO:0005524 ATP binding; GO:1901265 nucleoside phosphate binding; GO:0001882 nucleoside binding; GO:0043167 ion binding; GO:0005515 protein binding; GO:0000166 nucleotide binding; GO:0097159 organic cyclic compound binding; GO:1901363 heterocyclic compound binding; GO:0032549 ribonucleoside binding; GO:0097367 carbohydrate derivative binding; GO:0032553 ribonucleotide binding; GO:0005488 binding; …	K04043	dnaK; molecular chaperone DnaK	sly03018 RNA degradation - Solanum lycopersicum (tomato);	IPR029048; IPR029047;	Heat shock protein 70kD, C-terminal domain; Heat shock protein 70kD, peptide-binding domain;	O	KOG0102	Molecular chaperones mortalin/PBP74/GRP75, HSP70 superfamily
A0A1U8E7T6	Uncharacterized protein OS=Capsicum annuum OX=4072 GN=T459_32087	T459_32087	40.811	5.4201	7.3	3	5	3	0.988	0.979	1.069	1.028	0.933	1.03	0.985	0.7413	cytoplasm			GO:0043169 cation binding; GO:0046872 metal ion binding; GO:0005509 calcium ion binding; GO:0005488 binding; GO:0043167 ion binding;				IPR002048; IPR011992;	EF-hand domain; EF-hand domain pair;
A0A1U8E7U2	Uncharacterized protein OS=Capsicum annuum OX=4072 GN=T459_03045	T459_03045	49.633	14.109	8.4	3	3	3	1.015	1.018	1.011	1.014	0.955	0.99	0.972	0.24424	vacuolar membrane							IPR001480;	Bulb-type lectin domain;	T	KOG1187	Serine/threonine protein kinase
A0A1U8E7W0	Wound-induced protein WIN2 OS=Capsicum annuum OX=4072 GN=T459_32257	T459_32257	19.704	9.9002	9.5	1	1	1	1	1.013	0.858	1.076	0.938	1.124	1.093	0.30898	extracellular	GO:0050832 defense response to fungus; GO:0009605 response to external stimulus; GO:0009620 response to fungus; GO:0006950 response to stress; GO:0042742 defense response to bacterium; GO:0098542 defense response to other organism; GO:0006952 defense response; GO:0043207 response to external biotic stimulus; GO:0050896 response to stimulus; GO:0051707 response to other organism; GO:0009617 respon…						IPR009009; IPR001153;	RlpA-like protein, double-psi beta-barrel domain; Barwin domain;	R	KOG4742	Predicted chitinase
A0A1U8E7W4	40S ribosomal protein S21 OS=Capsicum annuum OX=4072 GN=T459_02996	T459_02996	9.2603	5.5893	18.3	1	1	1									mitochondria	GO:0006518 peptide metabolic process; GO:0043043 peptide biosynthetic process; GO:0044267 cellular protein metabolic process; GO:0006807 nitrogen compound metabolic process; GO:0009058 biosynthetic process; GO:0043603 cellular amide metabolic process; GO:0044238 primary metabolic process; GO:1901566 organonitrogen compound biosynthetic process; GO:1901576 organic substance biosynthetic process; G…	GO:0005840 ribosome; GO:0043226 organelle; GO:0043229 intracellular organelle; GO:0043232 intracellular non-membrane-bounded organelle; GO:0044464 cell part; GO:0005622 intracellular; GO:0005737 cytoplasm; GO:0032991 macromolecular complex; GO:0044424 intracellular part; GO:1990904 ribonucleoprotein complex; GO:0005623 cell; GO:0030529 intracellular ribonucleoprotein complex; GO:0044444 cytoplasm…	GO:0003735 structural constituent of ribosome; GO:0005198 structural molecule activity;	K02971	RP-S21e; small subunit ribosomal protein S21e	sly03010 Ribosome - Solanum lycopersicum (tomato);			J	KOG3486	40S ribosomal protein S21
A0A1U8E7W8	Malic enzyme OS=Capsicum annuum OX=4072 GN=T459_14774	T459_14774	64.244	129.92	35.3	17	51	14	0.935	0.961	0.95	1.04	1.063	1.047	1.107	0.00058192	plasma membrane	GO:0043648 dicarboxylic acid metabolic process; GO:0008152 metabolic process; GO:0055114 oxidation-reduction process; GO:0044710 single-organism metabolic process; GO:0006108 malate metabolic process; GO:0044281 small molecule metabolic process; GO:0019752 carboxylic acid metabolic process; GO:0044763 single-organism cellular process; GO:0044699 single-organism process; GO:0006082 organic acid me…		GO:0004471 malate dehydrogenase (decarboxylating) (NAD+) activity; GO:1901265 nucleoside phosphate binding; GO:0000166 nucleotide binding; GO:0048037 cofactor binding; GO:0016491 oxidoreductase activity; GO:0016614 oxidoreductase activity, acting on CH-OH group of donors; GO:1901363 heterocyclic compound binding; GO:0097159 organic cyclic compound binding; GO:0016616 oxidoreductase activity, acti…	K00029	E1.1.1.40; malate dehydrogenase (oxaloacetate-decarboxylating)(NADP+) [EC:1.1.1.40]	sly00620 Pyruvate metabolism - Solanum lycopersicum (tomato); sly01200 Carbon metabolism - Solanum lycopersicum (tomato); sly00710 Carbon fixation in photosynthetic organisms - Solanum lycopersicum (tomato); sly01100 Metabolic pathways - Solanum lycopersicum (tomato);	IPR012302; IPR012301; IPR016040;	Malic enzyme, NAD-binding; Malic enzyme, N-terminal domain; NAD(P)-binding domain;	C	KOG1257	NADP+-dependent malic enzyme
A0A1U8E7Y7	Proteasome subunit alpha type OS=Capsicum annuum OX=4072 GN=T459_32135	T459_32135	27.142	53.368	27.7	6	13	6	0.982	0.965	0.961	1.048	1.021	1.012	1.059	0.0096427	cytoplasm	GO:0043632 modification-dependent macromolecule catabolic process; GO:0044265 cellular macromolecule catabolic process; GO:0051603 proteolysis involved in cellular protein catabolic process; GO:0044257 cellular protein catabolic process; GO:0019941 modification-dependent protein catabolic process; GO:0044267 cellular protein metabolic process; GO:0006511 ubiquitin-dependent protein catabolic proc…	GO:0019773 proteasome core complex, alpha-subunit complex; GO:1902494 catalytic complex; GO:0000502 proteasome complex; GO:0044464 cell part; GO:0005622 intracellular; GO:0005839 proteasome core complex; GO:0032991 macromolecular complex; GO:0044424 intracellular part; GO:1905368 peptidase complex; GO:0005623 cell; GO:0043234 protein complex; GO:1905369 endopeptidase complex;	GO:0004175 endopeptidase activity; GO:0004298 threonine-type endopeptidase activity; GO:0008233 peptidase activity; GO:0070003 threonine-type peptidase activity; GO:0003824 catalytic activity; GO:0070011 peptidase activity, acting on L-amino acid peptides; GO:0016787 hydrolase activity;	K02731	PSMA7; 20S proteasome subunit alpha 4 [EC:3.4.25.1]	sly03050 Proteasome - Solanum lycopersicum (tomato);	IPR000426; IPR029055;	Proteasome alpha-subunit, N-terminal domain; Nucleophile aminohydrolases, N-terminal;	O	KOG0183	20S proteasome, regulatory subunit alpha type PSMA7/PRE6
A0A1U8E802	Rac-like GTP-binding protein RAC1 OS=Capsicum annuum OX=4072 GN=T459_32146	T459_32146	21.731	3.9727	21.2	3	5	3	1.022	0.915	1.019	0.983	0.992	1.071	1.03	0.538	cytoplasm	GO:0050794 regulation of cellular process; GO:0044700 single organism signaling; GO:0051716 cellular response to stimulus; GO:0007165 signal transduction; GO:0050789 regulation of biological process; GO:0007154 cell communication; GO:0035556 intracellular signal transduction; GO:0044699 single-organism process; GO:0007264 small GTPase mediated signal transduction; GO:0023052 signaling; GO:0050896…		GO:1901265 nucleoside phosphate binding; GO:0001882 nucleoside binding; GO:0043167 ion binding; GO:0000166 nucleotide binding; GO:0097159 organic cyclic compound binding; GO:1901363 heterocyclic compound binding; GO:0032549 ribonucleoside binding; GO:0097367 carbohydrate derivative binding; GO:0032553 ribonucleotide binding; GO:0005488 binding; GO:0032550 purine ribonucleoside binding; GO:0043168…	K04392	RAC1; Ras-related C3 botulinum toxin substrate 1	sly04933 AGE-RAGE signaling pathway in diabetic complications - Solanum lycopersicum (tomato); sly04145 Phagosome - Solanum lycopersicum (tomato);	IPR005225; IPR027417;	Small GTP-binding protein domain; P-loop containing nucleoside triphosphate hydrolase;	R	KOG0393	Ras-related small GTPase, Rho type
A0A1U8E820	18.5 kDa class I heat shock protein OS=Capsicum annuum OX=4072 GN=T459_32217	T459_32217	18.093	8.0286	30.8	5	10	2	0.355	0.419	0.393	1.613	1.642	1.516	4.088	1.63866e-05	cytoplasm				K13993	HSP20; HSP20 family protein	sly04141 Protein processing in endoplasmic reticulum - Solanum lycopersicum (tomato);	IPR002068; IPR008978;	Alpha crystallin/Hsp20 domain; HSP20-like chaperone;	O	KOG0710	Molecular chaperone (small heat-shock protein Hsp26/Hsp42)
A0A1U8E835	Uncharacterized protein OS=Capsicum annuum OX=4072 GN=T459_32204	T459_32204	33.279	8.2735	20.6	5	5	5	1.01	0.952	1.002	1.034	0.975	1.034	1.027	0.38514	cytoplasm				K17607					S	KOG3224	Uncharacterized conserved protein
A0A1U8E849	Basic secretory protease OS=Capsicum annuum OX=4072 GN=T459_32189	T459_32189	25.311	29.171	35	9	19	9	0.898	0.873	0.885	1.094	1.131	1.092	1.249	9.6312e-05	vacuolar membrane
A0A1U8E862	Expansin-like A2 OS=Capsicum annuum OX=4072 GN=T459_33567	T459_33567	28.235	11.476	21.5	6	10	6	0.95	0.966	0.905	1.063	1.077	1.045	1.129	0.0047423	chloroplast	GO:0019953 sexual reproduction; GO:0000003 reproduction; GO:0022414 reproductive process; GO:0051704 multi-organism process; GO:0044703 multi-organism reproductive process;	GO:0005576 extracellular region;					IPR009009; IPR007112; IPR007117;	RlpA-like protein, double-psi beta-barrel domain; Expansin/pollen allergen, DPBB domain; Expansin, cellulose-binding-like domain;
A0A1U8E874	ABC transporter F family member 4 OS=Capsicum annuum OX=4072 GN=T459_26105	T459_26105	81.087	2.9531	2.1	1	1	1									cytoplasm			GO:0005524 ATP binding; GO:1901265 nucleoside phosphate binding; GO:0001882 nucleoside binding; GO:0043167 ion binding; GO:0016817 hydrolase activity, acting on acid anhydrides; GO:0016787 hydrolase activity; GO:0000166 nucleotide binding; GO:0017111 nucleoside-triphosphatase activity; GO:0016887 ATPase activity; GO:0097159 organic cyclic compound binding; GO:1901363 heterocyclic compound binding…	K06184			IPR003593; IPR003439; IPR027417;	AAA+ ATPase domain; ABC transporter-like; P-loop containing nucleoside triphosphate hydrolase;	J	KOG0066	eIF2-interacting protein ABC50 (ABC superfamily)
A0A1U8E8C4	"Glutamate--tRNA ligase, chloroplastic/mitochondrial OS=Capsicum annuum OX=4072 GN=T459_34417"	T459_34417	62.825	36.14	11.3	6	7	6	1.063	1.024	1.071	0.932	0.998	0.981	0.922	0.03012	chloroplast	GO:0006518 peptide metabolic process; GO:0006725 cellular aromatic compound metabolic process; GO:0044267 cellular protein metabolic process; GO:0044699 single-organism process; GO:0009058 biosynthetic process; GO:1901566 organonitrogen compound biosynthetic process; GO:0043039 tRNA aminoacylation; GO:0044237 cellular metabolic process; GO:0071704 organic substance metabolic process; GO:0008152 m…	GO:0044424 intracellular part; GO:0005623 cell; GO:0044464 cell part; GO:0005622 intracellular; GO:0005737 cytoplasm;	GO:0016876 ligase activity, forming aminoacyl-tRNA and related compounds; GO:1901265 nucleoside phosphate binding; GO:0016875 ligase activity, forming carbon-oxygen bonds; GO:0004818 glutamate-tRNA ligase activity; GO:0016874 ligase activity; GO:0097159 organic cyclic compound binding; GO:1901363 heterocyclic compound binding; GO:0000049 tRNA binding; GO:0003824 catalytic activity; GO:0032553 rib…	K01885	EARS; glutamyl-tRNA synthetase [EC:6.1.1.17]	sly00860 Porphyrin and chlorophyll metabolism - Solanum lycopersicum (tomato); sly00970 Aminoacyl-tRNA biosynthesis - Solanum lycopersicum (tomato); sly01110 Biosynthesis of secondary metabolites - Solanum lycopersicum (tomato); sly01100 Metabolic pathways - Solanum lycopersicum (tomato);	IPR014729; IPR020061; IPR033910; IPR008925; IPR020058; IPR020751;	Rossmann-like alpha/beta/alpha sandwich fold; Glutamyl/glutaminyl-tRNA synthetase, class Ib, alpha-bundle domain; Glutamyl-tRNA synthetase; Aminoacyl-tRNA synthetase, class I, anticodon-binding; Glutamyl/glutaminyl-tRNA synthetase, class Ib, catalytic domain; Aminoacyl-tRNA synthetase, class I, anticodon-binding domain, subdomain 2;	J	KOG1149	Glutamyl-tRNA synthetase (mitochondrial)
A0A1U8E8E6	Cell division protein FtsZ OS=Capsicum annuum OX=4072 GN=T459_26172	T459_26172	50.539	60.881	24.5	9	20	5	0.945	1.033	0.995	1.01	0.963	1.035	1.012	0.73904	endoplasmic reticulum		GO:0044424 intracellular part; GO:0005623 cell; GO:0044464 cell part; GO:0005622 intracellular; GO:0005737 cytoplasm;	GO:1901265 nucleoside phosphate binding; GO:0001882 nucleoside binding; GO:0043167 ion binding; GO:0016817 hydrolase activity, acting on acid anhydrides; GO:0016787 hydrolase activity; GO:0000166 nucleotide binding; GO:0017111 nucleoside-triphosphatase activity; GO:0097159 organic cyclic compound binding; GO:1901363 heterocyclic compound binding; GO:0032549 ribonucleoside binding; GO:0097367 carb…	K03531			IPR024757; IPR003008; IPR018316; IPR008280;	Cell division protein FtsZ, C-terminal; Tubulin/FtsZ, GTPase domain; Tubulin/FtsZ, 2-layer sandwich domain; Tubulin/FtsZ, C-terminal;
A0A1U8E8E8	Aquaporin PIP2-1 OS=Capsicum annuum OX=4072 GN=T459_22670	T459_22670	29.803	48.525	14.7	4	8	2	1.016	0.995	1.012	0.956	1.056	0.982	0.99	0.74748	plasma membrane	GO:0006810 transport; GO:0051179 localization; GO:0051234 establishment of localization;	GO:0016020 membrane;	GO:0005215 transporter activity;	K09872			IPR023271;	Aquaporin-like;	G	KOG0223	Aquaporin (major intrinsic protein family)
A0A1U8E8L1	N-acetyl-gamma-glutamyl-phosphate reductase OS=Capsicum annuum OX=4072 GN=T459_31727	T459_31727	44.358	73.842	32.9	9	17	9	1.015	0.997	1.041	0.989	0.946	0.984	0.956	0.075444	chloroplast	GO:0009064 glutamine family amino acid metabolic process; GO:0008652 cellular amino acid biosynthetic process; GO:0006526 arginine biosynthetic process; GO:0016053 organic acid biosynthetic process; GO:0044711 single-organism biosynthetic process; GO:0055114 oxidation-reduction process; GO:0044281 small molecule metabolic process; GO:0006525 arginine metabolic process; GO:0044763 single-organism …	GO:0044424 intracellular part; GO:0005623 cell; GO:0044464 cell part; GO:0005622 intracellular; GO:0005737 cytoplasm;	GO:1901265 nucleoside phosphate binding; GO:0046983 protein dimerization activity; GO:0016903 oxidoreductase activity, acting on the aldehyde or oxo group of donors; GO:0005515 protein binding; GO:0000166 nucleotide binding; GO:0048037 cofactor binding; GO:0016491 oxidoreductase activity; GO:0016620 oxidoreductase activity, acting on the aldehyde or oxo group of donors, NAD or NADP as acceptor; G…	K00145	argC; N-acetyl-gamma-glutamyl-phosphate reductase [EC:1.2.1.38]	sly01110 Biosynthesis of secondary metabolites - Solanum lycopersicum (tomato); sly01210 2-Oxocarboxylic acid metabolism - Solanum lycopersicum (tomato); sly00220 Arginine biosynthesis - Solanum lycopersicum (tomato); sly01230 Biosynthesis of amino acids - Solanum lycopersicum (tomato); sly01100 Metabolic pathways - Solanum lycopersicum (tomato);	IPR012280; IPR000534; IPR016040;	Semialdehyde dehydrogenase, dimerisation domain; Semialdehyde dehydrogenase, NAD-binding; NAD(P)-binding domain;	E	KOG4354	N-acetyl-gamma-glutamyl-phosphate reductase
A0A1U8E8L4	Secoisolariciresinol dehydrogenase OS=Capsicum annuum OX=4072 GN=T459_26235	T459_26235	30.81	5.3106	5.8	1	2	1	1.1	1.077	1.103	0.965	0.827	0.951	0.836	0.067895	chloroplast							IPR016040;	NAD(P)-binding domain;	R	KOG0725	Reductases with broad range of substrate specificities
A0A1U8E8L6	"Phosphoglucomutase, cytoplasmic OS=Capsicum annuum OX=4072 GN=T459_03017"	T459_03017	63.522	201.34	57.6	27	55	14	0.972	0.987	1.006	1.037	1.004	0.985	1.021	0.324	chloroplast	GO:0008152 metabolic process; GO:0005975 carbohydrate metabolic process; GO:0044238 primary metabolic process; GO:0071704 organic substance metabolic process;		GO:0000287 magnesium ion binding; GO:0016853 isomerase activity; GO:0003824 catalytic activity; GO:0005488 binding; GO:0016868 intramolecular transferase activity, phosphotransferases; GO:0043167 ion binding; GO:0046872 metal ion binding; GO:0043169 cation binding; GO:0016866 intramolecular transferase activity;	K01835	pgm; phosphoglucomutase [EC:5.4.2.2]	sly01110 Biosynthesis of secondary metabolites - Solanum lycopersicum (tomato); sly00500 Starch and sucrose metabolism - Solanum lycopersicum (tomato); sly00052 Galactose metabolism - Solanum lycopersicum (tomato); sly00010 Glycolysis / Gluconeogenesis - Solanum lycopersicum (tomato); sly01100 Metabolic pathways - Solanum lycopersicum (tomato); sly00230 Purine metabolism - Solanum lycopersicum (t…	IPR005843; IPR005846; IPR005845; IPR016055; IPR005844;	Alpha-D-phosphohexomutase, C-terminal; Alpha-D-phosphohexomutase, alpha/beta/alpha domain III; Alpha-D-phosphohexomutase, alpha/beta/alpha domain II; Alpha-D-phosphohexomutase, alpha/beta/alpha I/II/III; Alpha-D-phosphohexomutase, alpha/beta/alpha domain I;	G	KOG0625	Phosphoglucomutase
A0A1U8E8M2	Ubiquitin-conjugating enzyme E2 variant 1C OS=Capsicum annuum OX=4072 GN=T459_26238	T459_26238	16.63	38.318	51.7	6	11	2	0.929	0.956	0.964	1.04	1.005	1.111	1.108	0.032081	cytoplasm				K10704			IPR016135; IPR000608;	Ubiquitin-conjugating enzyme/RWD-like; Ubiquitin-conjugating enzyme E2;	O	KOG0896	Ubiquitin-conjugating enzyme E2
A0A1U8E8P0	Uncharacterized protein OS=Capsicum annuum OX=4072 GN=T459_26268	T459_26268	23.953	58.998	17.5	2	3	2	1.099	1.063	1.072	0.914	0.914	0.953	0.86	0.00091842	cytoplasm							IPR004864;	Late embryogenesis abundant protein, LEA-14;
A0A1U8E8Q2	Proteasome assembly chaperone 2 OS=Capsicum annuum OX=4072 GN=T459_31776	T459_31776	30.601	1.8533	8.2	2	2	2	0.971	1.019	0.903	1.029	1.03	1.051	1.075	0.109225	cytoplasm				K11876					S	KOG3112	Uncharacterized conserved protein
A0A1U8E8S2	Plasma membrane ATPase OS=Capsicum annuum OX=4072 GN=T459_24500	T459_24500	101.39	3.1486	7.4	7	12	1									plasma membrane	GO:0009116 nucleoside metabolic process; GO:0042278 purine nucleoside metabolic process; GO:0009167 purine ribonucleoside monophosphate metabolic process; GO:0009117 nucleotide metabolic process; GO:0044699 single-organism process; GO:0046129 purine ribonucleoside biosynthetic process; GO:0009163 nucleoside biosynthetic process; GO:0009058 biosynthetic process; GO:0009156 ribonucleoside monophosp…	GO:0031224 intrinsic component of membrane; GO:0016020 membrane; GO:0016021 integral component of membrane; GO:0044425 membrane part;	GO:1901265 nucleoside phosphate binding; GO:0043167 ion binding; GO:0016817 hydrolase activity, acting on acid anhydrides; GO:0016787 hydrolase activity; GO:0000166 nucleotide binding; GO:0017111 nucleoside-triphosphatase activity; GO:0016887 ATPase activity; GO:1901363 heterocyclic compound binding; GO:0097159 organic cyclic compound binding; GO:0016462 pyrophosphatase activity; GO:0003824 catal…	K01535	PMA1; H+-transporting ATPase [EC:7.1.2.1]	sly00190 Oxidative phosphorylation - Solanum lycopersicum (tomato);	IPR023298; IPR004014; IPR023299; IPR008250; IPR023214;	P-type ATPase, transmembrane domain; Cation-transporting P-type ATPase, N-terminal; P-type ATPase, cytoplasmic domain N; P-type ATPase, A domain; HAD-like domain;	P	KOG0205	Plasma membrane H+-transporting ATPase
A0A1U8E8S7	"50S ribosomal protein 5, chloroplastic OS=Capsicum annuum OX=4072 GN=T459_26401"	T459_26401	16.259	6.4296	10.2	1	2	1	1.051	1.037	0.901	1.026	0.966	1.027	1.01	0.83322	chloroplast				K19034
A0A1U8E8S9	Uncharacterized protein OS=Capsicum annuum OX=4072 GN=T459_31794	T459_31794	46.234	19.455	14.2	5	5	5	0.988	0.992	0.987	1.013	1.02	1.005	1.024	0.006542	nucleus	GO:0006518 peptide metabolic process; GO:0006725 cellular aromatic compound metabolic process; GO:0044267 cellular protein metabolic process; GO:0044699 single-organism process; GO:0009058 biosynthetic process; GO:1901566 organonitrogen compound biosynthetic process; GO:0043039 tRNA aminoacylation; GO:0044237 cellular metabolic process; GO:0071704 organic substance metabolic process; GO:0008152 m…		GO:0016876 ligase activity, forming aminoacyl-tRNA and related compounds; GO:0005524 ATP binding; GO:1901265 nucleoside phosphate binding; GO:0016875 ligase activity, forming carbon-oxygen bonds; GO:0016874 ligase activity; GO:0001882 nucleoside binding; GO:0043167 ion binding; GO:0000166 nucleotide binding; GO:0097159 organic cyclic compound binding; GO:1901363 heterocyclic compound binding; GO:…	K01866	YARS; tyrosyl-tRNA synthetase [EC:6.1.1.1]	sly00970 Aminoacyl-tRNA biosynthesis - Solanum lycopersicum (tomato);	IPR014729;	Rossmann-like alpha/beta/alpha sandwich fold;	J	KOG2144	Tyrosyl-tRNA synthetase, cytoplasmic
A0A1U8E8T0	Proteasome subunit alpha type OS=Capsicum annuum OX=4072 GN=T459_26398	T459_26398	27.097	16.769	32.5	7	15	3	1.018	0.955	0.963	1.008	1.022	1.033	1.043	0.115077	cytoskeleton	GO:0043632 modification-dependent macromolecule catabolic process; GO:0044265 cellular macromolecule catabolic process; GO:0051603 proteolysis involved in cellular protein catabolic process; GO:0044257 cellular protein catabolic process; GO:0019941 modification-dependent protein catabolic process; GO:0044267 cellular protein metabolic process; GO:0006511 ubiquitin-dependent protein catabolic proc…	GO:0019773 proteasome core complex, alpha-subunit complex; GO:1902494 catalytic complex; GO:0000502 proteasome complex; GO:0044464 cell part; GO:0005622 intracellular; GO:0005839 proteasome core complex; GO:0032991 macromolecular complex; GO:0044424 intracellular part; GO:1905368 peptidase complex; GO:0005623 cell; GO:0043234 protein complex; GO:1905369 endopeptidase complex;	GO:0004175 endopeptidase activity; GO:0004298 threonine-type endopeptidase activity; GO:0008233 peptidase activity; GO:0070003 threonine-type peptidase activity; GO:0003824 catalytic activity; GO:0070011 peptidase activity, acting on L-amino acid peptides; GO:0016787 hydrolase activity;	K02727	PSMA3; 20S proteasome subunit alpha 7 [EC:3.4.25.1]	sly03050 Proteasome - Solanum lycopersicum (tomato);	IPR000426; IPR029055;	Proteasome alpha-subunit, N-terminal domain; Nucleophile aminohydrolases, N-terminal;	O	KOG0184	20S proteasome, regulatory subunit alpha type PSMA3/PRE10
A0A1U8E8T7	Dolichyl-diphosphooligosaccharide--protein glycosyltransferase 48 kDa subunit OS=Capsicum annuum OX=4072 GN=T459_31799	T459_31799	48.374	20.334	11	4	6	4	0.984	1.05	1.009	0.966	0.951	1.017	0.964	0.25786	vacuolar membrane	GO:0043413 macromolecule glycosylation; GO:0044267 cellular protein metabolic process; GO:0044699 single-organism process; GO:0009058 biosynthetic process; GO:0018196 peptidyl-asparagine modification; GO:0044237 cellular metabolic process; GO:0071704 organic substance metabolic process; GO:0008152 metabolic process; GO:1901137 carbohydrate derivative biosynthetic process; GO:1901135 carbohydrate …	GO:0016020 membrane; GO:0043229 intracellular organelle; GO:0005783 endoplasmic reticulum; GO:0042175 nuclear outer membrane-endoplasmic reticulum membrane network; GO:0005737 cytoplasm; GO:0044446 intracellular organelle part; GO:0012505 endomembrane system; GO:0044424 intracellular part; GO:0005623 cell; GO:0044422 organelle part; GO:0043231 intracellular membrane-bounded organelle; GO:0043226 …		K12670	WBP1; oligosaccharyltransferase complex subunit beta	sly00510 N-Glycan biosynthesis - Solanum lycopersicum (tomato); sly04141 Protein processing in endoplasmic reticulum - Solanum lycopersicum (tomato); sly01100 Metabolic pathways - Solanum lycopersicum (tomato);			O	KOG2754	Oligosaccharyltransferase, beta subunit
A0A1U8E8U4	Protein phosphatase 2C 70 OS=Capsicum annuum OX=4072 GN=T459_02829	T459_02829	67.549	4.8086	2.6	1	1	1									chloroplast			GO:0043169 cation binding; GO:0005515 protein binding; GO:0003824 catalytic activity; GO:0005488 binding; GO:0043167 ion binding;	K01090			IPR008984; IPR001932; IPR000253;	SMAD/FHA domain; PPM-type phosphatase domain; Forkhead-associated (FHA) domain;	T	KOG0698	Serine/threonine protein phosphatase
A0A1U8E8U9	Uncharacterized protein OS=Capsicum annuum OX=4072 GN=T459_01120	T459_01120	44.701	28.823	3.7	1	2	1	1.02	0.987	1.144	0.914	1.031	0.908	0.905	0.179098	chloroplast
A0A1U8E8Z4	Beta-galactosidase OS=Capsicum annuum OX=4072 GN=T459_34213	T459_34213	81.448	44.567	19.3	12	21	9	0.97	0.993	0.997	1.036	1.015	1.021	1.038	0.024025	chloroplast	GO:0008152 metabolic process; GO:0005975 carbohydrate metabolic process; GO:0044238 primary metabolic process; GO:0071704 organic substance metabolic process;		GO:0004553 hydrolase activity, hydrolyzing O-glycosyl compounds; GO:0016787 hydrolase activity; GO:0003824 catalytic activity; GO:0016798 hydrolase activity, acting on glycosyl bonds;				IPR031330; IPR017853; IPR013781; IPR008979;	Glycoside hydrolase 35, catalytic domain; Glycoside hydrolase superfamily; Glycoside hydrolase, catalytic domain; Galactose-binding domain-like;	G	KOG0496	Beta-galactosidase
A0A1U8E900	"20 kDa chaperonin, chloroplastic OS=Capsicum annuum OX=4072 GN=T459_24397"	T459_24397	26.499	226.9	61.1	15	52	15	1.007	0.996	0.998	0.999	1.012	0.975	0.995	0.67744	chloroplast	GO:0050794 regulation of cellular process; GO:1901671 positive regulation of superoxide dismutase activity; GO:1901033 positive regulation of response to reactive oxygen species; GO:1900409 positive regulation of cellular response to oxidative stress; GO:0080134 regulation of response to stress; GO:0006457 protein folding; GO:1902884 positive regulation of response to oxidative stress; GO:0009893…	GO:0044424 intracellular part; GO:0005623 cell; GO:0044464 cell part; GO:0005622 intracellular; GO:0005737 cytoplasm;	GO:0005524 ATP binding; GO:1901265 nucleoside phosphate binding; GO:0001882 nucleoside binding; GO:0043167 ion binding; GO:0000166 nucleotide binding; GO:0097159 organic cyclic compound binding; GO:1901363 heterocyclic compound binding; GO:0032549 ribonucleoside binding; GO:0097367 carbohydrate derivative binding; GO:0046914 transition metal ion binding; GO:0032553 ribonucleotide binding; GO:0005…	K04078			IPR011032;	GroES-like;	O	KOG1641	Mitochondrial chaperonin
A0A1U8E901	Zinc finger CCCH domain-containing protein 14 OS=Capsicum annuum OX=4072 GN=T459_26464	T459_26464	30.769	41.792	28.5	6	6	6	1.004	0.989	0.989	0.963	0.971	1.026	0.993	0.72382	nucleus			GO:0097159 organic cyclic compound binding; GO:1901363 heterocyclic compound binding; GO:0003723 RNA binding; GO:0005488 binding; GO:0043167 ion binding; GO:0003676 nucleic acid binding; GO:0043169 cation binding; GO:0046872 metal ion binding;				IPR000571; IPR004087; IPR004088;	Zinc finger, CCCH-type; K Homology domain; K Homology domain, type 1;	R	KOG1677	CCCH-type Zn-finger protein
A0A1U8E914	Proteasome subunit alpha type OS=Capsicum annuum OX=4072 GN=T459_24385	T459_24385	27.306	52.605	41.5	9	16	9	0.973	0.973	0.96	1.042	1.041	1.046	1.077	9.8312e-05	cytoplasm	GO:0043632 modification-dependent macromolecule catabolic process; GO:0051603 proteolysis involved in cellular protein catabolic process; GO:0044265 cellular macromolecule catabolic process; GO:0044257 cellular protein catabolic process; GO:0019941 modification-dependent protein catabolic process; GO:0044267 cellular protein metabolic process; GO:0006511 ubiquitin-dependent protein catabolic proc…	GO:0019773 proteasome core complex, alpha-subunit complex; GO:1902494 catalytic complex; GO:0000502 proteasome complex; GO:0044464 cell part; GO:0005622 intracellular; GO:0005839 proteasome core complex; GO:0032991 macromolecular complex; GO:0044424 intracellular part; GO:1905368 peptidase complex; GO:0005623 cell; GO:0043234 protein complex; GO:1905369 endopeptidase complex;	GO:0004175 endopeptidase activity; GO:0004298 threonine-type endopeptidase activity; GO:0008233 peptidase activity; GO:0070003 threonine-type peptidase activity; GO:0003824 catalytic activity; GO:0070011 peptidase activity, acting on L-amino acid peptides; GO:0016787 hydrolase activity;	K02730	PSMA6; 20S proteasome subunit alpha 1 [EC:3.4.25.1]	sly03050 Proteasome - Solanum lycopersicum (tomato);	IPR000426; IPR029055;	Proteasome alpha-subunit, N-terminal domain; Nucleophile aminohydrolases, N-terminal;	O	KOG0182	20S proteasome, regulatory subunit alpha type PSMA6/SCL1
A0A1U8E953	Arginine decarboxylase OS=Capsicum annuum OX=4072 GN=T459_01418	T459_01418	78.211	1.9505	2.3	2	2	2	0.49	0.471	0.429	1.488	1.502	1.568	3.279	4.8968e-06	endoplasmic reticulum	GO:1901606 alpha-amino acid catabolic process; GO:0008216 spermidine metabolic process; GO:0044699 single-organism process; GO:0097164 ammonium ion metabolic process; GO:0009058 biosynthetic process; GO:1901566 organonitrogen compound biosynthetic process; GO:0044237 cellular metabolic process; GO:0006576 cellular biogenic amine metabolic process; GO:0071704 organic substance metabolic process; G…		GO:0016831 carboxy-lyase activity; GO:0016829 lyase activity; GO:0003824 catalytic activity; GO:0016830 carbon-carbon lyase activity; GO:0008792 arginine decarboxylase activity;	K01583	E4.1.1.19; arginine decarboxylase [EC:4.1.1.19]	sly00330 Arginine and proline metabolism - Solanum lycopersicum (tomato); sly01100 Metabolic pathways - Solanum lycopersicum (tomato);	IPR022643; IPR009006; IPR029066; IPR022644;	Orn/DAP/Arg decarboxylase 2, C-terminal; Alanine racemase/group IV decarboxylase, C-terminal; PLP-binding barrel; Orn/DAP/Arg decarboxylase 2, N-terminal;
A0A1U8E958	"ABC transporter B family member 29, chloroplastic OS=Capsicum annuum OX=4072 GN=T459_22410"	T459_22410	67.97	1.4257	1.3	1	1	1	0.894	1.166	0.817	0.923	1.112	1.088	1.086	0.49982	chloroplast	GO:0006810 transport; GO:0055085 transmembrane transport; GO:0051179 localization; GO:0051234 establishment of localization;	GO:0031224 intrinsic component of membrane; GO:0016020 membrane; GO:0016021 integral component of membrane; GO:0044425 membrane part;	GO:1901265 nucleoside phosphate binding; GO:0015399 primary active transmembrane transporter activity; GO:0016817 hydrolase activity, acting on acid anhydrides; GO:0016787 hydrolase activity; GO:0016887 ATPase activity; GO:0097159 organic cyclic compound binding; GO:1901363 heterocyclic compound binding; GO:0016462 pyrophosphatase activity; GO:0003824 catalytic activity; GO:0032553 ribonucleotide…	K02021			IPR003593; IPR003439; IPR011527; IPR027417;	AAA+ ATPase domain; ABC transporter-like; ABC transporter type 1, transmembrane domain; P-loop containing nucleoside triphosphate hydrolase;	U	KOG0058	Peptide exporter, ABC superfamily
A0A1U8E9B3	"Protein FATTY ACID EXPORT 1, chloroplastic OS=Capsicum annuum OX=4072 GN=T459_26579"	T459_26579	24.332	3.5109	4.8	1	2	1	1.01	0.947	0.986	0.986	1.061	1.009	1.038	0.26022	chloroplast		GO:0016020 membrane;							S	KOG4267	Predicted membrane protein
A0A1U8E9F6	E3 ubiquitin-protein ligase UPL3 OS=Capsicum annuum OX=4072 GN=T459_32141	T459_32141	202.56	3.2499	0.7	1	1	1	1.018	1.121	0.855	0.917	1	1.095	1.006	0.92414	nucleus			GO:0005515 protein binding; GO:0019787 ubiquitin-like protein transferase activity; GO:0003824 catalytic activity; GO:0016740 transferase activity; GO:0005488 binding; GO:0004842 ubiquitin-protein transferase activity;	K10590	TRIP12; E3 ubiquitin-protein ligase TRIP12 [EC:2.3.2.26]	sly04120 Ubiquitin mediated proteolysis - Solanum lycopersicum (tomato);	IPR011989; IPR016024; IPR000569;	Armadillo-like helical; Armadillo-type fold; HECT domain;	O	KOG0170	E3 ubiquitin protein ligase
A0A1U8E9G8	Heavy metal-associated isoprenylated plant protein 26 OS=Capsicum annuum OX=4072 GN=T459_32153	T459_32153	17.272	11.469	26.1	5	5	5	1.211	1.161	1.11	0.895	0.734	0.921	0.732	0.0139788	chloroplast	GO:0006810 transport; GO:0051179 localization; GO:0006812 cation transport; GO:0030001 metal ion transport; GO:0006811 ion transport; GO:0051234 establishment of localization;		GO:0046872 metal ion binding; GO:0043169 cation binding; GO:0005488 binding; GO:0043167 ion binding;				IPR006121;	Heavy metal-associated domain, HMA;	P	KOG1603	Copper chaperone
A0A1U8E9H2	Aquaporin PIP2-1 OS=Capsicum annuum OX=4072 GN=T459_32157	T459_32157	30.286	15.973	14.5	3	5	3	1.058	1.089	1.014	1.022	0.979	0.861	0.905	0.141298	plasma membrane	GO:0006810 transport; GO:0051179 localization; GO:0051234 establishment of localization;	GO:0016020 membrane;	GO:0005215 transporter activity;	K09872			IPR023271;	Aquaporin-like;	G	KOG0223	Aquaporin (major intrinsic protein family)
A0A1U8E9I6	"Outer envelope pore protein 16-3, chloroplastic/mitochondrial OS=Capsicum annuum OX=4072 GN=T459_26629"	T459_26629	16.961	6.9705	11.9	2	6	2	0.981	1.016	1.042	0.934	1.05	0.953	0.966	0.43066	cytoplasm									U	KOG3225	Mitochondrial import inner membrane translocase, subunit TIM22
A0A1U8E9J7	Zinc finger CCCH domain-containing protein 14 OS=Capsicum annuum OX=4072 GN=T459_26636	T459_26636	31.472	29.018	25	6	9	6	0.999	0.969	1.012	0.98	1.006	1.01	1.005	0.75096	nucleus			GO:0097159 organic cyclic compound binding; GO:1901363 heterocyclic compound binding; GO:0003723 RNA binding; GO:0005488 binding; GO:0043167 ion binding; GO:0003676 nucleic acid binding; GO:0043169 cation binding; GO:0046872 metal ion binding;				IPR000571; IPR004087; IPR004088;	Zinc finger, CCCH-type; K Homology domain; K Homology domain, type 1;	R	KOG1677	CCCH-type Zn-finger protein
A0A1U8E9K1	Uncharacterized protein OS=Capsicum annuum OX=4072 GN=T459_26640	T459_26640	69.28	7.154	6.4	4	4	4									cytoplasm							IPR028565; IPR018808;	Mu homology domain; Muniscin C-terminal;	D	KOG2398	Predicted proline-serine-threonine phosphatase-interacting protein (PSTPIP)
A0A1U8E9L7	"Probable alanine--tRNA ligase, chloroplastic OS=Capsicum annuum OX=4072 GN=T459_33568"	T459_33568	108.33	52.638	21.3	19	25	19	1.063	1.02	1.044	0.958	0.954	0.959	0.918	0.0194175	chloroplast	GO:0006518 peptide metabolic process; GO:0006725 cellular aromatic compound metabolic process; GO:0044267 cellular protein metabolic process; GO:0044699 single-organism process; GO:0009058 biosynthetic process; GO:1901566 organonitrogen compound biosynthetic process; GO:0043039 tRNA aminoacylation; GO:0044237 cellular metabolic process; GO:0071704 organic substance metabolic process; GO:0008152 m…	GO:0043226 organelle; GO:0043231 intracellular membrane-bounded organelle; GO:0043229 intracellular organelle; GO:0044464 cell part; GO:0005622 intracellular; GO:0005737 cytoplasm; GO:0044424 intracellular part; GO:0043227 membrane-bounded organelle; GO:0005623 cell; GO:0009536 plastid; GO:0044444 cytoplasmic part; GO:0009507 chloroplast;	GO:0016876 ligase activity, forming aminoacyl-tRNA and related compounds; GO:0005524 ATP binding; GO:1901265 nucleoside phosphate binding; GO:0016875 ligase activity, forming carbon-oxygen bonds; GO:0001882 nucleoside binding; GO:0043167 ion binding; GO:0016874 ligase activity; GO:0000166 nucleotide binding; GO:0097159 organic cyclic compound binding; GO:1901363 heterocyclic compound binding; GO:…	K01872	AARS; alanyl-tRNA synthetase [EC:6.1.1.7]	sly00970 Aminoacyl-tRNA biosynthesis - Solanum lycopersicum (tomato);	IPR018164; IPR018163; IPR012947; IPR003156; IPR018162; IPR009000; IPR018165;	Alanyl-tRNA synthetase, class IIc, N-terminal; Threonyl/alanyl tRNA synthetase, class II-like, putative editing domain; Threonyl/alanyl tRNA synthetase, SAD; DHHA1 domain; Alanine-tRNA ligase, class IIc, anti-codon-binding domain; Translation protein, beta-barrel domain; Alanyl-tRNA synthetase, class IIc, core domain;	J	KOG0188	Alanyl-tRNA synthetase
A0A1U8E9L8	60S ribosomal protein L21-2 OS=Capsicum annuum OX=4072 GN=T459_32731	T459_32731	18.658	7.3233	25	5	6	5	0.948	1.017	0.986	1.014	1.011	1.065	1.047	0.155563	cytoplasm	GO:0006518 peptide metabolic process; GO:0043043 peptide biosynthetic process; GO:0044267 cellular protein metabolic process; GO:0006807 nitrogen compound metabolic process; GO:0009058 biosynthetic process; GO:0043603 cellular amide metabolic process; GO:0044238 primary metabolic process; GO:1901566 organonitrogen compound biosynthetic process; GO:1901576 organic substance biosynthetic process; G…	GO:0005840 ribosome; GO:0043226 organelle; GO:0043229 intracellular organelle; GO:0043232 intracellular non-membrane-bounded organelle; GO:0044464 cell part; GO:0005622 intracellular; GO:0005737 cytoplasm; GO:0032991 macromolecular complex; GO:0044424 intracellular part; GO:1990904 ribonucleoprotein complex; GO:0005623 cell; GO:0030529 intracellular ribonucleoprotein complex; GO:0044444 cytoplasm…	GO:0003735 structural constituent of ribosome; GO:0005198 structural molecule activity;	K02889	RP-L21e; large subunit ribosomal protein L21e	sly03010 Ribosome - Solanum lycopersicum (tomato);	IPR008991;	Translation protein SH3-like domain;	J	KOG1732	60S ribosomal protein L21
A0A1U8E9N3	Glutamate dehydrogenase OS=Capsicum annuum OX=4072 GN=T459_32763	T459_32763	44.604	75.807	41.4	14	26	14	0.972	0.963	0.963	1.06	1.038	1.027	1.078	0.00153838	cytoplasm	GO:0055114 oxidation-reduction process; GO:0044281 small molecule metabolic process; GO:0044763 single-organism cellular process; GO:0006807 nitrogen compound metabolic process; GO:0044699 single-organism process; GO:0044238 primary metabolic process; GO:0044237 cellular metabolic process; GO:0071704 organic substance metabolic process; GO:0008152 metabolic process; GO:0006520 cellular amino acid…		GO:0016638 oxidoreductase activity, acting on the CH-NH2 group of donors; GO:0004352 glutamate dehydrogenase (NAD+) activity; GO:0003824 catalytic activity; GO:0016639 oxidoreductase activity, acting on the CH-NH2 group of donors, NAD or NADP as acceptor; GO:0016491 oxidoreductase activity;	K00261	GLUD1_2; glutamate dehydrogenase (NAD(P)+) [EC:1.4.1.3]	sly00910 Nitrogen metabolism - Solanum lycopersicum (tomato); sly01200 Carbon metabolism - Solanum lycopersicum (tomato); sly00220 Arginine biosynthesis - Solanum lycopersicum (tomato); sly00250 Alanine, aspartate and glutamate metabolism - Solanum lycopersicum (tomato); sly01100 Metabolic pathways - Solanum lycopersicum (tomato);	IPR006096; IPR016040; IPR033922; IPR006097;	Glutamate/phenylalanine/leucine/valine dehydrogenase, C-terminal; NAD(P)-binding domain; NAD(P) binding domain of glutamate dehydrogenase; Glutamate/phenylalanine/leucine/valine dehydrogenase, dimerisation domain;	E	KOG2250	Glutamate/leucine/phenylalanine/valine dehydrogenases
A0A1U8E9Q0	U6 snRNA-associated Sm-like protein LSm6 OS=Capsicum annuum OX=4072 GN=T459_32772	T459_32772	9.8181	2.0442	12.1	1	2	1	1.017	0.889	0.957	0.999	1.05	1.085	1.095	0.116216	cytoplasm				K12625	LSM6; U6 snRNA-associated Sm-like protein LSm6	sly03040 Spliceosome - Solanum lycopersicum (tomato); sly03018 RNA degradation - Solanum lycopersicum (tomato);	IPR001163; IPR010920;	LSM domain, eukaryotic/archaea-type; LSM domain;	A	KOG1783	Small nuclear ribonucleoprotein F
A0A1U8E9Q3	"Glucan endo-1,3-beta-glucosidase 5 OS=Capsicum annuum OX=4072 GN=T459_32767"	T459_32767	53.36	1.5598	4	2	2	2									plasma membrane	GO:0008152 metabolic process; GO:0005975 carbohydrate metabolic process; GO:0044238 primary metabolic process; GO:0071704 organic substance metabolic process;		GO:0004553 hydrolase activity, hydrolyzing O-glycosyl compounds; GO:0016787 hydrolase activity; GO:0003824 catalytic activity; GO:0016798 hydrolase activity, acting on glycosyl bonds;				IPR012946; IPR017853; IPR013781;	X8 domain; Glycoside hydrolase superfamily; Glycoside hydrolase, catalytic domain;
A0A1U8E9T2	Uncharacterized protein OS=Capsicum annuum OX=4072 GN=T459_02795	T459_02795	46.874	109.08	15.8	6	12	6	0.97	0.944	0.934	1.07	1.039	1.03	1.102	0.0037977	chloroplast							IPR032799; IPR033121; IPR021109; IPR032861; IPR033868;	Xylanase inhibitor, C-terminal; Peptidase family A1 domain; Aspartic peptidase domain; Xylanase inhibitor, N-terminal; Xylanase inhibitor I-like;	O	KOG1339	Aspartyl protease
A0A1U8E9V7	Nascent polypeptide-associated complex subunit alpha-like protein 3 OS=Capsicum annuum OX=4072 GN=T459_32681	T459_32681	21.65	7.974	45.5	5	11	2	0.959	1.05	1.015	0.994	0.996	0.994	0.987	0.68038	nucleus				K03626			IPR002715;	Nascent polypeptide-associated complex NAC domain;	K	KOG2239	Transcription factor containing NAC and TS-N domains
A0A1U8E9W3	Proteasome subunit alpha type OS=Capsicum annuum OX=4072 GN=T459_32700	T459_32700	27.25	49.276	35.7	8	19	4	0.969	0.926	0.956	1.003	1.113	1.039	1.107	0.039478	cytoplasm	GO:0043632 modification-dependent macromolecule catabolic process; GO:0044265 cellular macromolecule catabolic process; GO:0051603 proteolysis involved in cellular protein catabolic process; GO:0044257 cellular protein catabolic process; GO:0019941 modification-dependent protein catabolic process; GO:0044267 cellular protein metabolic process; GO:0006511 ubiquitin-dependent protein catabolic proc…	GO:0019773 proteasome core complex, alpha-subunit complex; GO:1902494 catalytic complex; GO:0000502 proteasome complex; GO:0044464 cell part; GO:0005622 intracellular; GO:0005839 proteasome core complex; GO:0032991 macromolecular complex; GO:0044424 intracellular part; GO:1905368 peptidase complex; GO:0005623 cell; GO:0043234 protein complex; GO:1905369 endopeptidase complex;	GO:0004175 endopeptidase activity; GO:0004298 threonine-type endopeptidase activity; GO:0008233 peptidase activity; GO:0070003 threonine-type peptidase activity; GO:0003824 catalytic activity; GO:0070011 peptidase activity, acting on L-amino acid peptides; GO:0016787 hydrolase activity;	K02727	PSMA3; 20S proteasome subunit alpha 7 [EC:3.4.25.1]	sly03050 Proteasome - Solanum lycopersicum (tomato);	IPR029055; IPR000426;	Nucleophile aminohydrolases, N-terminal; Proteasome alpha-subunit, N-terminal domain;	O	KOG0184	20S proteasome, regulatory subunit alpha type PSMA3/PRE10
A0A1U8E9W4	"Acyl-coenzyme A oxidase 4, peroxisomal OS=Capsicum annuum OX=4072 GN=T459_25881"	T459_25881	46.908	62.017	27.1	9	15	9	0.94	0.978	0.949	1.072	1.018	1.036	1.09	0.0110403	nucleus	GO:0044699 single-organism process; GO:0008152 metabolic process; GO:0055114 oxidation-reduction process; GO:0044710 single-organism metabolic process;		GO:1901265 nucleoside phosphate binding; GO:0050660 flavin adenine dinucleotide binding; GO:0043167 ion binding; GO:0000166 nucleotide binding; GO:0048037 cofactor binding; GO:0016491 oxidoreductase activity; GO:0016627 oxidoreductase activity, acting on the CH-CH group of donors; GO:1901363 heterocyclic compound binding; GO:0097159 organic cyclic compound binding; GO:0003824 catalytic activity; …	K00232	E1.3.3.6; acyl-CoA oxidase [EC:1.3.3.6]	sly01040 Biosynthesis of unsaturated fatty acids - Solanum lycopersicum (tomato); sly01110 Biosynthesis of secondary metabolites - Solanum lycopersicum (tomato); sly00592 alpha-Linolenic acid metabolism - Solanum lycopersicum (tomato); sly01212 Fatty acid metabolism - Solanum lycopersicum (tomato); sly04146 Peroxisome - Solanum lycopersicum (tomato); sly01100 Metabolic pathways - Solanum lycopers…	IPR009100; IPR013786; IPR006091; IPR009075;	Acyl-CoA dehydrogenase/oxidase, N-terminal and middle domain; Acyl-CoA dehydrogenase/oxidase, N-terminal; Acyl-CoA oxidase/dehydrogenase, central domain; Acyl-CoA dehydrogenase/oxidase C-terminal;	E	KOG0138	Glutaryl-CoA dehydrogenase
A0A1U8E9Y1	Replication factor C subunit 3 OS=Capsicum annuum OX=4072 GN=T459_32712	T459_32712	40.599	4.2852	5.9	2	2	2	1.013	1.038	1.011	0.942	0.956	1.05	0.963	0.32756	cytoplasm	GO:0006260 DNA replication; GO:0006725 cellular aromatic compound metabolic process; GO:0006259 DNA metabolic process; GO:1901360 organic cyclic compound metabolic process; GO:0006807 nitrogen compound metabolic process; GO:0009058 biosynthetic process; GO:0044238 primary metabolic process; GO:1901576 organic substance biosynthetic process; GO:0044237 cellular metabolic process; GO:0044249 cellul…		GO:0097159 organic cyclic compound binding; GO:1901363 heterocyclic compound binding; GO:0003677 DNA binding; GO:0005488 binding; GO:0003676 nucleic acid binding;	K10756	RFC3_5; replication factor C subunit 3/5	sly03030 DNA replication - Solanum lycopersicum (tomato); sly03420 Nucleotide excision repair - Solanum lycopersicum (tomato); sly03430 Mismatch repair - Solanum lycopersicum (tomato);	IPR003593; IPR008921; IPR027417;	AAA+ ATPase domain; DNA polymerase III, clamp loader complex, gamma/delta/delta subunit, C-terminal; P-loop containing nucleoside triphosphate hydrolase;	DL	KOG2035	Replication factor C, subunit RFC3
A0A1U8E9Z5	Eukaryotic translation initiation factor 3 subunit B OS=Capsicum annuum OX=4072 GN=T459_03147	T459_03147	83.014	137.12	23.8	17	22	17	1.022	0.978	0.998	1.005	1.01	0.967	0.995	0.78828	cytoplasm	GO:0006518 peptide metabolic process; GO:0043043 peptide biosynthetic process; GO:0044267 cellular protein metabolic process; GO:0006807 nitrogen compound metabolic process; GO:0009058 biosynthetic process; GO:0043603 cellular amide metabolic process; GO:0044238 primary metabolic process; GO:1901566 organonitrogen compound biosynthetic process; GO:0044237 cellular metabolic process; GO:1901576 or…	GO:0044464 cell part; GO:0005622 intracellular; GO:0005737 cytoplasm; GO:0032991 macromolecular complex; GO:0044424 intracellular part; GO:0043234 protein complex; GO:0005623 cell; GO:0044444 cytoplasmic part; GO:0005852 eukaryotic translation initiation factor 3 complex;	GO:0097159 organic cyclic compound binding; GO:1901363 heterocyclic compound binding; GO:0008135 translation factor activity, RNA binding; GO:0003723 RNA binding; GO:1901265 nucleoside phosphate binding; GO:0031369 translation initiation factor binding; GO:0005488 binding; GO:0003676 nucleic acid binding; GO:0003743 translation initiation factor activity; GO:0005515 protein binding; GO:0000166 nu…	K03253	EIF3B; translation initiation factor 3 subunit B	sly03013 RNA transport - Solanum lycopersicum (tomato);	IPR000504; IPR013979; IPR012677; IPR015943; IPR034363; IPR011042;	RNA recognition motif domain; Translation initiation factor, beta propellor-like domain; Nucleotide-binding alpha-beta plait domain; WD40/YVTN repeat-like-containing domain; eIF3B, RNA recognition motif; Six-bladed beta-propeller, TolB-like;	J	KOG2314	Translation initiation factor 3, subunit b (eIF-3b)
A0A1U8E9Z7	Beta-hexosaminidase OS=Capsicum annuum OX=4072 GN=T459_03041	T459_03041	63.945	14.64	9.1	5	5	5	0.898	0.92	0.971	1.054	1.029	1.071	1.131	0.0088357	chloroplast	GO:0008152 metabolic process; GO:0005975 carbohydrate metabolic process; GO:0044238 primary metabolic process; GO:0071704 organic substance metabolic process;		GO:0004563 beta-N-acetylhexosaminidase activity; GO:0004553 hydrolase activity, hydrolyzing O-glycosyl compounds; GO:0016787 hydrolase activity; GO:0003824 catalytic activity; GO:0015929 hexosaminidase activity; GO:0016798 hydrolase activity, acting on glycosyl bonds;	K12373	HEXA_B; hexosaminidase [EC:3.2.1.52]	sly00604 Glycosphingolipid biosynthesis - ganglio series - Solanum lycopersicum (tomato); sly00531 Glycosaminoglycan degradation - Solanum lycopersicum (tomato); sly00511 Other glycan degradation - Solanum lycopersicum (tomato); sly00603 Glycosphingolipid biosynthesis - globo and isoglobo series - Solanum lycopersicum (tomato); sly01100 Metabolic pathways - Solanum lycopersicum (tomato); sly00520…	IPR029018; IPR029019; IPR015883; IPR017853; IPR013781;	Chitobiase/beta-hexosaminidase domain 2-like; Beta-hexosaminidase, eukaryotic type, N-terminal; Glycoside hydrolase family 20, catalytic domain; Glycoside hydrolase superfamily; Glycoside hydrolase, catalytic domain;	G	KOG2499	Beta-N-acetylhexosaminidase
A0A1U8EA19	NEDD8-activating enzyme E1 catalytic subunit OS=Capsicum annuum OX=4072 GN=T459_02840	T459_02840	49.033	5.2292	12.4	5	5	5	0.975	1.023	1.019	0.995	1.062	1.004	1.015	0.6057	cytoplasm	GO:0045116 protein neddylation; GO:0008152 metabolic process; GO:0032446 protein modification by small protein conjugation; GO:0044260 cellular macromolecule metabolic process; GO:0044267 cellular protein metabolic process; GO:0006464 cellular protein modification process; GO:0043170 macromolecule metabolic process; GO:0019538 protein metabolic process; GO:0070647 protein modification by small pr…		GO:0008641 small protein activating enzyme activity; GO:0005524 ATP binding; GO:1901265 nucleoside phosphate binding; GO:0001882 nucleoside binding; GO:0043167 ion binding; GO:0016874 ligase activity; GO:0016877 ligase activity, forming carbon-sulfur bonds; GO:0000166 nucleotide binding; GO:0016881 acid-amino acid ligase activity; GO:0016879 ligase activity, forming carbon-nitrogen bonds; GO:0097…	K10686	UBE1C; ubiquitin-activating enzyme E1 C [EC:6.2.1.45]	sly04120 Ubiquitin mediated proteolysis - Solanum lycopersicum (tomato);	IPR000594; IPR016040; IPR023318; IPR014929;	THIF-type NAD/FAD binding fold; NAD(P)-binding domain; Ubiquitin activating enzyme, alpha domain; E2 binding;	O	KOG2015	NEDD8-activating complex, catalytic component UBA3
A0A1U8EA32	Putative serine/threonine-protein kinase OS=Capsicum annuum OX=4072 GN=T459_03152	T459_03152	55.192	14.481	10.8	4	4	3	0.922	1.016	1.067	0.965	1.031	1.003	0.998	0.9914	cytoplasm	GO:0016310 phosphorylation; GO:0044267 cellular protein metabolic process; GO:0044238 primary metabolic process; GO:0044237 cellular metabolic process; GO:0006796 phosphate-containing compound metabolic process; GO:0071704 organic substance metabolic process; GO:0008152 metabolic process; GO:0006468 protein phosphorylation; GO:0006793 phosphorus metabolic process; GO:0044260 cellular macromolecul…		GO:0005524 ATP binding; GO:1901265 nucleoside phosphate binding; GO:0016773 phosphotransferase activity, alcohol group as acceptor; GO:0001882 nucleoside binding; GO:0043167 ion binding; GO:0005515 protein binding; GO:0004672 protein kinase activity; GO:0000166 nucleotide binding; GO:0097159 organic cyclic compound binding; GO:1901363 heterocyclic compound binding; GO:0032549 ribonucleoside bindi…	K14500	BSK; BR-signaling kinase [EC:2.7.11.1]	sly04075 Plant hormone signal transduction - Solanum lycopersicum (tomato);	IPR000719; IPR011990; IPR001245; IPR011009;	Protein kinase domain; Tetratricopeptide-like helical domain; Serine-threonine/tyrosine-protein kinase catalytic domain; Protein kinase-like domain;	T	KOG1187	Serine/threonine protein kinase
A0A1U8EAC9	S-adenosylmethionine synthase OS=Capsicum annuum OX=4072 GN=T459_26081	T459_26081	42.616	4.5077	26.7	9	13	2	0.962	0.982	1.08	0.92	0.962	1.102	0.987	0.82846	cytoskeleton	GO:0051188 cofactor biosynthetic process; GO:0006790 sulfur compound metabolic process; GO:0046500 S-adenosylmethionine metabolic process; GO:0009058 biosynthetic process; GO:0006732 coenzyme metabolic process; GO:1901576 organic substance biosynthetic process; GO:0044237 cellular metabolic process; GO:0044272 sulfur compound biosynthetic process; GO:0044249 cellular biosynthetic process; GO:0051…		GO:0005524 ATP binding; GO:1901265 nucleoside phosphate binding; GO:0001882 nucleoside binding; GO:0043167 ion binding; GO:0000166 nucleotide binding; GO:0004478 methionine adenosyltransferase activity; GO:0097159 organic cyclic compound binding; GO:1901363 heterocyclic compound binding; GO:0032549 ribonucleoside binding; GO:0097367 carbohydrate derivative binding; GO:0003824 catalytic activity; …	K00789	metK; S-adenosylmethionine synthetase [EC:2.5.1.6]	sly01110 Biosynthesis of secondary metabolites - Solanum lycopersicum (tomato); sly00270 Cysteine and methionine metabolism - Solanum lycopersicum (tomato); sly01230 Biosynthesis of amino acids - Solanum lycopersicum (tomato); sly01100 Metabolic pathways - Solanum lycopersicum (tomato);	IPR022636; IPR022628; IPR022629; IPR022630;	S-adenosylmethionine synthetase superfamily; S-adenosylmethionine synthetase, N-terminal; S-adenosylmethionine synthetase, central domain; S-adenosylmethionine synthetase, C-terminal;	H	KOG1506	S-adenosylmethionine synthetase
A0A1U8EAH7	Pyruvate kinase OS=Capsicum annuum OX=4072 GN=T459_26128	T459_26128	57.308	44.889	31.1	14	26	8	0.856	0.904	0.892	1.084	1.123	1.129	1.258	0.00038143	cytoplasm	GO:0006757 ATP generation from ADP; GO:0009116 nucleoside metabolic process; GO:0042278 purine nucleoside metabolic process; GO:0006165 nucleoside diphosphate phosphorylation; GO:0046031 ADP metabolic process; GO:0019362 pyridine nucleotide metabolic process; GO:0006096 glycolytic process; GO:0009167 purine ribonucleoside monophosphate metabolic process; GO:0009117 nucleotide metabolic process; G…		GO:0000287 magnesium ion binding; GO:0004743 pyruvate kinase activity; GO:0016773 phosphotransferase activity, alcohol group as acceptor; GO:0003824 catalytic activity; GO:0005488 binding; GO:0043167 ion binding; GO:0030955 potassium ion binding; GO:0046872 metal ion binding; GO:0043169 cation binding; GO:0031420 alkali metal ion binding; GO:0016740 transferase activity; GO:0016772 transferase ac…	K00873	PK; pyruvate kinase [EC:2.7.1.40]	sly00620 Pyruvate metabolism - Solanum lycopersicum (tomato); sly01110 Biosynthesis of secondary metabolites - Solanum lycopersicum (tomato); sly00230 Purine metabolism - Solanum lycopersicum (tomato); sly01200 Carbon metabolism - Solanum lycopersicum (tomato); sly00010 Glycolysis / Gluconeogenesis - Solanum lycopersicum (tomato); sly01230 Biosynthesis of amino acids - Solanum lycopersicum (tomat…	IPR015794; IPR011037; IPR015813; IPR015806; IPR015795; IPR015793;	Pyruvate kinase, alpha/beta; Pyruvate kinase-like, insert domain; Pyruvate/Phosphoenolpyruvate kinase-like domain; Pyruvate kinase, beta-barrel insert domain; Pyruvate kinase, C-terminal; Pyruvate kinase, barrel;	G	KOG2323	Pyruvate kinase
A0A1U8EAL0	Acyl carrier protein OS=Capsicum annuum OX=4072 GN=T459_03167	T459_03167	13.701	12.437	30.3	3	6	3	0.961	1.005	0.994	1.09	0.905	1.097	1.045	0.5696	chloroplast	GO:0044711 single-organism biosynthetic process; GO:0016053 organic acid biosynthetic process; GO:0044281 small molecule metabolic process; GO:0044763 single-organism cellular process; GO:0044699 single-organism process; GO:0009058 biosynthetic process; GO:0044255 cellular lipid metabolic process; GO:0006631 fatty acid metabolic process; GO:0044238 primary metabolic process; GO:0044237 cellular m…			K03955	NDUFAB1; NADH dehydrogenase (ubiquinone) 1 alpha/beta subcomplex 1	sly00190 Oxidative phosphorylation - Solanum lycopersicum (tomato); sly01100 Metabolic pathways - Solanum lycopersicum (tomato);	IPR009081;	Phosphopantetheine binding ACP domain;	CIQ	KOG1748	Acyl carrier protein/NADH-ubiquinone oxidoreductase, NDUFAB1/SDAP subunit
A0A1U8EAP7	60S ribosomal protein L31 OS=Capsicum annuum OX=4072 GN=T459_24333	T459_24333	13.856	19.581	27.5	2	5	2	1.023	1.034	1.034	0.922	0.997	0.981	0.938	0.116338	cytoplasm	GO:0006518 peptide metabolic process; GO:0043043 peptide biosynthetic process; GO:0044267 cellular protein metabolic process; GO:0006807 nitrogen compound metabolic process; GO:0009058 biosynthetic process; GO:0043603 cellular amide metabolic process; GO:0044238 primary metabolic process; GO:1901566 organonitrogen compound biosynthetic process; GO:1901576 organic substance biosynthetic process; G…	GO:0005840 ribosome; GO:0043226 organelle; GO:0043229 intracellular organelle; GO:0043232 intracellular non-membrane-bounded organelle; GO:0044464 cell part; GO:0005622 intracellular; GO:0005737 cytoplasm; GO:0032991 macromolecular complex; GO:0044424 intracellular part; GO:1990904 ribonucleoprotein complex; GO:0005623 cell; GO:0030529 intracellular ribonucleoprotein complex; GO:0044444 cytoplasm…	GO:0003735 structural constituent of ribosome; GO:0005198 structural molecule activity;	K02910	RP-L31e; large subunit ribosomal protein L31e	sly03010 Ribosome - Solanum lycopersicum (tomato);	IPR023621;	Ribosomal protein L31e domain;	J	KOG0893	60S ribosomal protein L31
A0A1U8EAT6	"Heme-binding-like protein, chloroplastic OS=Capsicum annuum OX=4072 GN=T459_26203"	T459_26203	33.409	26.069	34	10	13	10	0.936	0.995	0.949	1.044	1.044	1.038	1.085	0.047515	chloroplast							IPR011256;	Regulatory factor, effector binding domain;
A0A1U8EB05	Putative glutathione S-transferase OS=Capsicum annuum OX=4072 GN=T459_03063	T459_03063	25.64	48.791	29.8	8	15	8	0.998	0.996	0.973	0.998	1.032	1.009	1.024	0.134457	cytoplasm			GO:0005515 protein binding; GO:0005488 binding;	K00799	GST; glutathione S-transferase [EC:2.5.1.18]	sly00480 Glutathione metabolism - Solanum lycopersicum (tomato);	IPR004046; IPR010987; IPR012336; IPR004045;	Glutathione S-transferase, C-terminal; Glutathione S-transferase, C-terminal-like; Thioredoxin-like fold; Glutathione S-transferase, N-terminal;	O	KOG0406	Glutathione S-transferase
A0A1U8EB09	"Putative glucan 1,3-alpha-glucosidase OS=Capsicum annuum OX=4072 GN=T459_03186"	T459_03186	105.49	44.869	10.9	10	12	10	1.061	1.018	1.054	0.973	0.966	0.968	0.928	0.0045578	plasma membrane	GO:0008152 metabolic process; GO:0005975 carbohydrate metabolic process; GO:0044238 primary metabolic process; GO:0071704 organic substance metabolic process;		GO:0004553 hydrolase activity, hydrolyzing O-glycosyl compounds; GO:0030246 carbohydrate binding; GO:0016787 hydrolase activity; GO:0003824 catalytic activity; GO:0005488 binding; GO:0016798 hydrolase activity, acting on glycosyl bonds;	K05546	GANAB; mannosyl-oligosaccharide alpha-1,3-glucosidase [EC:3.2.1.207]	sly00510 N-Glycan biosynthesis - Solanum lycopersicum (tomato); sly04141 Protein processing in endoplasmic reticulum - Solanum lycopersicum (tomato); sly01100 Metabolic pathways - Solanum lycopersicum (tomato);	IPR011013; IPR025887; IPR017853;	Galactose mutarotase-like domain; Glycoside hydrolase family 31, N-terminal domain; Glycoside hydrolase superfamily;	GMO	KOG1066	Glucosidase II catalytic (alpha) subunit and related enzymes, glycosyl hydrolase family 31
A0A1U8EB40	"Fe-S cluster assembly factor, chloroplastic OS=Capsicum annuum OX=4072 GN=T459_24190"	T459_24190	57.988	41.544	14.2	6	8	6	1.088	0.94	1.16	0.932	0.861	1.019	0.882	0.191445	chloroplast			GO:0005524 ATP binding; GO:1901265 nucleoside phosphate binding; GO:0001882 nucleoside binding; GO:0043167 ion binding; GO:0000166 nucleotide binding; GO:0097159 organic cyclic compound binding; GO:1901363 heterocyclic compound binding; GO:0032549 ribonucleoside binding; GO:0097367 carbohydrate derivative binding; GO:0032553 ribonucleotide binding; GO:0005488 binding; GO:0032550 purine ribonucleo…				IPR010376; IPR002744; IPR027417;	Domain of unknown function DUF971; Domain of unknown function DUF59; P-loop containing nucleoside triphosphate hydrolase;	D	KOG3022	Predicted ATPase, nucleotide-binding
A0A1U8EB53	Bifunctional protein FolD 2 OS=Capsicum annuum OX=4072 GN=T459_26413	T459_26413	32.069	78.824	25.1	6	10	6	1.008	1.052	1.027	0.963	1.085	0.962	0.975	0.55746	cytoplasm	GO:0051188 cofactor biosynthetic process; GO:0042559 pteridine-containing compound biosynthetic process; GO:0006725 cellular aromatic compound metabolic process; GO:0016053 organic acid biosynthetic process; GO:0042398 cellular modified amino acid biosynthetic process; GO:0044699 single-organism process; GO:0009058 biosynthetic process; GO:1901566 organonitrogen compound biosynthetic process; GO:…		GO:0004488 methylenetetrahydrofolate dehydrogenase (NADP+) activity; GO:0016645 oxidoreductase activity, acting on the CH-NH group of donors; GO:0016646 oxidoreductase activity, acting on the CH-NH group of donors, NAD or NADP as acceptor; GO:0003824 catalytic activity; GO:0016491 oxidoreductase activity;				IPR020631; IPR016040; IPR020630;	Tetrahydrofolate dehydrogenase/cyclohydrolase, NAD(P)-binding domain; NAD(P)-binding domain; Tetrahydrofolate dehydrogenase/cyclohydrolase, catalytic domain;	H	KOG0089	Methylenetetrahydrofolate dehydrogenase/methylenetetrahydrofolate cyclohydrolase
A0A1U8EB70	"Peroxiredoxin-2F, mitochondrial OS=Capsicum annuum OX=4072 GN=T459_02838"	T459_02838	20.783	22.809	30.4	6	9	6	1.02	1.016	1.004	1.001	1.007	0.958	0.976	0.20468	mitochondria	GO:0050794 regulation of cellular process; GO:0042592 homeostatic process; GO:0065008 regulation of biological quality; GO:0050789 regulation of biological process; GO:0045454 cell redox homeostasis; GO:0044763 single-organism cellular process; GO:0019725 cellular homeostasis; GO:0044699 single-organism process; GO:0009987 cellular process; GO:0065007 biological regulation;		GO:0003824 catalytic activity; GO:0016491 oxidoreductase activity;				IPR013766; IPR012336; IPR013740;	Thioredoxin domain; Thioredoxin-like fold; Redoxin;	O	KOG0541	Alkyl hydroperoxide reductase/peroxiredoxin
A0A1U8EBG6	Cystathionine beta-lyase OS=Capsicum annuum OX=4072 GN=T459_26536	T459_26536	50.973	18.653	10.4	5	7	5	1.069	1.003	1.13	0.972	0.878	0.949	0.874	0.043681	chloroplast	GO:0000097 sulfur amino acid biosynthetic process; GO:0016053 organic acid biosynthetic process; GO:0009066 aspartate family amino acid metabolic process; GO:0044699 single-organism process; GO:0009058 biosynthetic process; GO:1901566 organonitrogen compound biosynthetic process; GO:0044237 cellular metabolic process; GO:0044272 sulfur compound biosynthetic process; GO:0000096 sulfur amino acid m…		GO:0097159 organic cyclic compound binding; GO:1901363 heterocyclic compound binding; GO:0004121 cystathionine beta-lyase activity; GO:0003824 catalytic activity; GO:0005488 binding; GO:0043167 ion binding; GO:0016829 lyase activity; GO:0043168 anion binding; GO:0016846 carbon-sulfur lyase activity; GO:0048037 cofactor binding; GO:0030170 pyridoxal phosphate binding;	K01760	metC; cysteine-S-conjugate beta-lyase [EC:4.4.1.13]	sly00450 Selenocompound metabolism - Solanum lycopersicum (tomato); sly01110 Biosynthesis of secondary metabolites - Solanum lycopersicum (tomato); sly00270 Cysteine and methionine metabolism - Solanum lycopersicum (tomato); sly01230 Biosynthesis of amino acids - Solanum lycopersicum (tomato); sly01100 Metabolic pathways - Solanum lycopersicum (tomato);	IPR015424; IPR015422; IPR015421;	Pyridoxal phosphate-dependent transferase; Pyridoxal phosphate-dependent transferase, major region, subdomain 2; Pyridoxal phosphate-dependent transferase, major region, subdomain 1;	E	KOG0053	Cystathionine beta-lyases/cystathionine gamma-synthases
A0A1U8EBI0	"3-hydroxyisobutyryl-CoA hydrolase-like protein 1, mitochondrial OS=Capsicum annuum OX=4072 GN=T459_03286"	T459_03286	45.056	11.435	11.6	4	4	4	1.09	0.924	1.001	1.009	1.048	1.033	1.025	0.61422	chloroplast			GO:0016787 hydrolase activity; GO:0016289 CoA hydrolase activity; GO:0016790 thiolester hydrolase activity; GO:0003824 catalytic activity; GO:0003860 3-hydroxyisobutyryl-CoA hydrolase activity; GO:0016788 hydrolase activity, acting on ester bonds;	K05605	HIBCH; 3-hydroxyisobutyryl-CoA hydrolase [EC:3.1.2.4]	sly00410 beta-Alanine metabolism - Solanum lycopersicum (tomato); sly00640 Propanoate metabolism - Solanum lycopersicum (tomato); sly01200 Carbon metabolism - Solanum lycopersicum (tomato); sly00280 Valine, leucine and isoleucine degradation - Solanum lycopersicum (tomato); sly01100 Metabolic pathways - Solanum lycopersicum (tomato);	IPR029045;	ClpP/crotonase-like domain;	I	KOG1684	Enoyl-CoA hydratase
A0A1U8EBI5	Uncharacterized protein OS=Capsicum annuum OX=4072 GN=T459_24776	T459_24776	32.824	1.4691	3.5	1	1	1									mitochondria
A0A1U8EBI9	Uncharacterized protein OS=Capsicum annuum OX=4072 GN=T459_01949	T459_01949	25.35	1.9209	9.7	2	2	2	1.378	1.255	1.25	0.675	0.671	0.81	0.555	0.00104413	cytoplasm							IPR024286; IPR029055;	Domain of unknown function DUF3700; Nucleophile aminohydrolases, N-terminal;
A0A1U8EBJ1	Malate dehydrogenase OS=Capsicum annuum OX=4072 GN=T459_03287	T459_03287	35.452	6.8337	20.2	6	8	4	1.029	1.101	1.063	0.855	0.982	0.864	0.846	0.025457	cytoplasm	GO:0043648 dicarboxylic acid metabolic process; GO:0055114 oxidation-reduction process; GO:0044281 small molecule metabolic process; GO:0044763 single-organism cellular process; GO:0044699 single-organism process; GO:0005975 carbohydrate metabolic process; GO:0044238 primary metabolic process; GO:0044237 cellular metabolic process; GO:0071704 organic substance metabolic process; GO:0008152 metabo…		GO:0016614 oxidoreductase activity, acting on CH-OH group of donors; GO:0016616 oxidoreductase activity, acting on the CH-OH group of donors, NAD or NADP as acceptor; GO:0016615 malate dehydrogenase activity; GO:0003824 catalytic activity; GO:0030060 L-malate dehydrogenase activity; GO:0016491 oxidoreductase activity;	K00025	MDH1; malate dehydrogenase [EC:1.1.1.37]	sly00620 Pyruvate metabolism - Solanum lycopersicum (tomato); sly01110 Biosynthesis of secondary metabolites - Solanum lycopersicum (tomato); sly00630 Glyoxylate and dicarboxylate metabolism - Solanum lycopersicum (tomato); sly00270 Cysteine and methionine metabolism - Solanum lycopersicum (tomato); sly01200 Carbon metabolism - Solanum lycopersicum (tomato); sly00710 Carbon fixation in photosynth…	IPR022383; IPR016040; IPR001236; IPR015955;	Lactate/malate dehydrogenase, C-terminal; NAD(P)-binding domain; Lactate/malate dehydrogenase, N-terminal; Lactate dehydrogenase/glycoside hydrolase, family 4, C-terminal;	C	KOG1496	Malate dehydrogenase
A0A1U8EBN0	ATP-dependent (S)-NAD(P)H-hydrate dehydratase OS=Capsicum annuum OX=4072 GN=T459_02844	T459_02844	34.37	9.754	18	4	4	4	1.033	1.05	0.922	1.011	0.898	1.1	1.001	0.99518	extracellular			GO:0016829 lyase activity; GO:0016836 hydro-lyase activity; GO:0003824 catalytic activity; GO:0052855 ADP-dependent NAD(P)H-hydrate dehydratase activity; GO:0016835 carbon-oxygen lyase activity;	K17757			IPR029056;	Ribokinase-like;	G	KOG3974	Predicted sugar kinase
A0A1U8EBP2	Uncharacterized protein OS=Capsicum annuum OX=4072 GN=T459_03280	T459_03280	73.583	12.842	2.5	2	2	2	1.039	1.061	1.1	0.996	0.882	0.94	0.881	0.030042	nucleus				K14306	NUP62; nuclear pore complex protein Nup62	sly03013 RNA transport - Solanum lycopersicum (tomato);	IPR007758;	Nucleoporin, NSP1-like, C-terminal;	Y	KOG2196	Nuclear porin
A0A1U8EBP9	Uncharacterized protein OS=Capsicum annuum OX=4072 GN=T459_23638	T459_23638	25.688	34.274	29.3	6	15	6	1.048	1.001	1.048	0.944	0.956	1.006	0.938	0.061381	chloroplast							IPR005018;	DOMON domain;	T	KOG4293	Predicted membrane protein, contains DoH and Cytochrome b-561/ferric reductase transmembrane domains
A0A1U8EBW0	Uncharacterized protein OS=Capsicum annuum OX=4072 GN=T459_32725	T459_32725	39.636	40.884	33.1	11	16	11	0.887	0.908	0.841	1.147	1.119	1.103	1.278	0.00063906	cytoplasm	GO:0006950 response to stress; GO:0050896 response to stimulus;		GO:0001671 ATPase activator activity; GO:0030234 enzyme regulator activity; GO:0051087 chaperone binding; GO:0005488 binding; GO:0060589 nucleoside-triphosphatase regulator activity; GO:0005515 protein binding; GO:0060590 ATPase regulator activity; GO:0098772 molecular function regulator; GO:0008047 enzyme activator activity;				IPR015310; IPR023393;	Activator of Hsp90 ATPase, N-terminal; START-like domain;	S	KOG2936	Uncharacterized conserved protein
A0A1U8EBY5	Histidine-containing phosphotransfer protein 1 OS=Capsicum annuum OX=4072 GN=T459_33386	T459_33386	17.252	4.1586	11.3	2	2	2	1.056	1.151	1.172	0.73	0.984	0.919	0.779	0.055561	chloroplast	GO:0050794 regulation of cellular process; GO:0044700 single organism signaling; GO:0051716 cellular response to stimulus; GO:0007165 signal transduction; GO:0050789 regulation of biological process; GO:0007154 cell communication; GO:0035556 intracellular signal transduction; GO:0044699 single-organism process; GO:0000160 phosphorelay signal transduction system; GO:0023052 signaling; GO:0050896 r…		GO:0004871 signal transducer activity;	K14490	AHP; histidine-containing phosphotransfer peotein	sly04075 Plant hormone signal transduction - Solanum lycopersicum (tomato);	IPR008207;	Signal transduction histidine kinase, phosphotransfer (Hpt) domain;	T	KOG4747	Two-component phosphorelay intermediate involved in MAP kinase cascade regulation
A0A1U8EC67	NEDD8-activating enzyme E1 regulatory subunit OS=Capsicum annuum OX=4072 GN=T459_23935	T459_23935	59.953	12.51	6.9	3	4	3	0.964	1.049	1.072	0.951	0.995	0.977	0.947	0.20354	cytoplasm	GO:0045116 protein neddylation; GO:0008152 metabolic process; GO:0032446 protein modification by small protein conjugation; GO:0044260 cellular macromolecule metabolic process; GO:0044267 cellular protein metabolic process; GO:0006464 cellular protein modification process; GO:0043170 macromolecule metabolic process; GO:0019538 protein metabolic process; GO:0070647 protein modification by small pr…		GO:0008641 small protein activating enzyme activity; GO:0019781 NEDD8 activating enzyme activity; GO:0016877 ligase activity, forming carbon-sulfur bonds; GO:0003824 catalytic activity; GO:0016874 ligase activity;	K04532			IPR000594; IPR016040;	THIF-type NAD/FAD binding fold; NAD(P)-binding domain;	O	KOG2016	NEDD8-activating complex, APP-BP1/UBA5 component
A0A1U8EC90	"Magnesium-protoporphyrin IX monomethyl ester [oxidative] cyclase, chloroplastic OS=Capsicum annuum OX=4072 GN=T459_32698"	T459_32698	46.645	55.818	33	12	21	12	1.208	1.212	1.203	0.796	0.783	0.783	0.652	1.0817e-07	chloroplast	GO:0051188 cofactor biosynthetic process; GO:0046148 pigment biosynthetic process; GO:0006725 cellular aromatic compound metabolic process; GO:0015994 chlorophyll metabolic process; GO:0044699 single-organism process; GO:0009058 biosynthetic process; GO:1901566 organonitrogen compound biosynthetic process; GO:0044237 cellular metabolic process; GO:0071704 organic substance metabolic process; GO:0…		GO:0016709 oxidoreductase activity, acting on paired donors, with incorporation or reduction of molecular oxygen, NAD(P)H as one donor, and incorporation of one atom of oxygen; GO:0003824 catalytic activity; GO:0005488 binding; GO:0043167 ion binding; GO:0043169 cation binding; GO:0046872 metal ion binding; GO:0016705 oxidoreductase activity, acting on paired donors, with incorporation or reducti…	K04035	E1.14.13.81; magnesium-protoporphyrin IX monomethyl ester (oxidative) cyclase [EC:1.14.13.81]	sly00860 Porphyrin and chlorophyll metabolism - Solanum lycopersicum (tomato); sly01110 Biosynthesis of secondary metabolites - Solanum lycopersicum (tomato); sly01100 Metabolic pathways - Solanum lycopersicum (tomato);	IPR009078; IPR003251;	Ferritin-like superfamily; Rubrerythrin;
A0A1U8EC95	Calmodulin OS=Capsicum annuum OX=4072 GN=T459_28379	T459_28379	16.833	41.629	54.4	11	25	1	0.953	0.965	0.949	1.033	1.057	1.048	1.095	0.00041972	nucleus			GO:0043169 cation binding; GO:0046872 metal ion binding; GO:0005509 calcium ion binding; GO:0005488 binding; GO:0043167 ion binding;	K02183	CALM; calmodulin	sly04016 MAPK signaling pathway - plant - Solanum lycopersicum (tomato); sly04626 Plant-pathogen interaction - Solanum lycopersicum (tomato); sly04070 Phosphatidylinositol signaling system - Solanum lycopersicum (tomato);	IPR002048; IPR011992;	EF-hand domain; EF-hand domain pair;	T	KOG0027	Calmodulin and related proteins (EF-Hand superfamily)
A0A1U8EC97	Uncharacterized protein OS=Capsicum annuum OX=4072 GN=T459_26177	T459_26177	24.896	5.6264	11.8	4	7	4	1.023	1.013	0.976	1	1.027	0.962	0.992	0.75874	chloroplast							IPR032710; IPR009959;	NTF2-like domain; Polyketide cyclase SnoaL-like domain;
A0A1U8ECL6	COP9 signalosome complex subunit 7 OS=Capsicum annuum OX=4072 GN=T459_03256	T459_03256	29.632	4.3866	8.1	2	2	2	0.923	0.878	1.016	1.082	1.044	1.057	1.13	0.048343	nucleus			GO:0005515 protein binding; GO:0005488 binding;	K12180			IPR000717;	Proteasome component (PCI) domain;	OT	KOG3250	COP9 signalosome, subunit CSN7
A0A1U8ECP1	60S ribosomal protein L8 OS=Capsicum annuum OX=4072 GN=T459_23819	T459_23819	28.234	11.994	24.2	5	9	1	0.981	1.05	1.094	0.998	0.98	0.907	0.923	0.138882	cytoplasm	GO:0006518 peptide metabolic process; GO:0043043 peptide biosynthetic process; GO:0044267 cellular protein metabolic process; GO:0006807 nitrogen compound metabolic process; GO:0009058 biosynthetic process; GO:0043603 cellular amide metabolic process; GO:0044238 primary metabolic process; GO:1901566 organonitrogen compound biosynthetic process; GO:1901576 organic substance biosynthetic process; G…	GO:0005840 ribosome; GO:0043226 organelle; GO:0043229 intracellular organelle; GO:0043232 intracellular non-membrane-bounded organelle; GO:0044464 cell part; GO:0005622 intracellular; GO:0005737 cytoplasm; GO:0032991 macromolecular complex; GO:0044424 intracellular part; GO:1990904 ribonucleoprotein complex; GO:0005623 cell; GO:0030529 intracellular ribonucleoprotein complex; GO:0044444 cytoplasm…	GO:0003735 structural constituent of ribosome; GO:0005198 structural molecule activity;	K02938	RP-L8e; large subunit ribosomal protein L8e	sly03010 Ribosome - Solanum lycopersicum (tomato);	IPR008991; IPR012340; IPR022669; IPR014726; IPR022666; IPR014722;	Translation protein SH3-like domain; Nucleic acid-binding, OB-fold; Ribosomal protein L2, C-terminal; Ribosomal protein L2, domain 3; Ribosomal Proteins L2, RNA binding domain; Ribosomal protein L2 domain 2;	J	KOG2309	60s ribosomal protein L2/L8
A0A1U8ECP2	Uncharacterized protein OS=Capsicum annuum OX=4072 GN=T459_25339	T459_25339	50.434	2.9883	4.8	1	1	1									cytoplasm	GO:0006810 transport; GO:0051179 localization; GO:0051234 establishment of localization;	GO:0031224 intrinsic component of membrane; GO:0016020 membrane; GO:0016021 integral component of membrane; GO:0044425 membrane part;					IPR009038;	GOLD domain;
A0A1U8ECQ1	Signal peptidase I OS=Capsicum annuum OX=4072 GN=T459_24086	T459_24086	20.066	8.1903	16.1	4	4	4	0.956	0.935	0.987	1.086	1.037	1.078	1.112	0.0074575	endoplasmic reticulum	GO:0006518 peptide metabolic process; GO:0006465 signal peptide processing; GO:0044267 cellular protein metabolic process; GO:0006807 nitrogen compound metabolic process; GO:0016485 protein processing; GO:0043603 cellular amide metabolic process; GO:0044238 primary metabolic process; GO:0044237 cellular metabolic process; GO:0071704 organic substance metabolic process; GO:0008152 metabolic proces…	GO:0016020 membrane;	GO:0008233 peptidase activity; GO:0016787 hydrolase activity; GO:0003824 catalytic activity;	K13280	SEC11; signal peptidase I [EC:3.4.21.89]	sly03060 Protein export - Solanum lycopersicum (tomato);	IPR019759; IPR015927; IPR028360;	Peptidase S24/S26A/S26B; Peptidase S24/S26A/S26B/S26C; Peptidase S24/S26, beta-ribbon domain;	U	KOG3342	Signal peptidase I
A0A1U8ED05	"Chlorophyll a-b binding protein, chloroplastic OS=Capsicum annuum OX=4072 GN=T459_24767"	T459_24767	29.456	94.909	30.8	7	53	7	1.022	1.011	1.002	0.982	1.007	0.988	0.981	0.111356	chloroplast				K08909	LHCA3; light-harvesting complex I chlorophyll a/b binding protein 3	sly00196 Photosynthesis - antenna proteins - Solanum lycopersicum (tomato);	IPR023329;	Chlorophyll a/b binding protein domain;
A0A1U8ED17	Uncharacterized protein OS=Capsicum annuum OX=4072 GN=T459_03170	T459_03170	14.909	65.657	50.4	6	15	6	0.981	1.016	0.953	1.003	1.026	0.999	1.026	0.26344	chloroplast	GO:0006457 protein folding; GO:0009987 cellular process;	GO:0044424 intracellular part; GO:0005623 cell; GO:0044464 cell part; GO:0005622 intracellular; GO:0005737 cytoplasm;		K04078			IPR011032;	GroES-like;	O	KOG1641	Mitochondrial chaperonin
A0A1U8ED23	Uncharacterized protein OS=Capsicum annuum OX=4072 GN=T459_23804	T459_23804	62.498	6.1545	6.5	3	3	3	1.039	1.005	1.061	1.004	0.938	0.965	0.936	0.05916	plasma membrane	GO:0006810 transport; GO:0055085 transmembrane transport; GO:0051179 localization; GO:0051234 establishment of localization;	GO:0031224 intrinsic component of membrane; GO:0016020 membrane; GO:0016021 integral component of membrane; GO:0044425 membrane part;	GO:0043169 cation binding; GO:0046872 metal ion binding; GO:0005509 calcium ion binding; GO:0005488 binding; GO:0043167 ion binding;				IPR004837; IPR002048; IPR011992;	Sodium/calcium exchanger membrane region; EF-hand domain; EF-hand domain pair;
A0A1U8ED44	Uncharacterized protein OS=Capsicum annuum OX=4072 GN=T459_24719	T459_24719	32.696	19.815	20.1	5	7	5	1.018	1.04	1.044	0.949	1.056	0.924	0.944	0.22852	mitochondria
A0A1U8ED64	Trafficking protein particle complex subunit OS=Capsicum annuum OX=4072 GN=T459_33246	T459_33246	22.746	4.8342	20.5	4	5	4	1.014	1.062	1.034	0.973	0.936	0.996	0.934	0.038702	cytoplasm	GO:0006810 transport; GO:0048193 Golgi vesicle transport; GO:0051179 localization; GO:0051234 establishment of localization; GO:0016192 vesicle-mediated transport;	GO:0044464 cell part; GO:0005622 intracellular; GO:0030008 TRAPP complex; GO:0032991 macromolecular complex; GO:0044424 intracellular part; GO:0043234 protein complex; GO:0005623 cell; GO:0099023 tethering complex;		K20302			IPR024096;	NO signalling/Golgi transport ligand-binding domain;	U	KOG3330	Transport protein particle (TRAPP) complex subunit
A0A1U8ED87	"Chlorophyll a-b binding protein, chloroplastic OS=Capsicum annuum OX=4072 GN=T459_24031"	T459_24031	28.686	95.019	32.1	7	47	2	1.004	1.005	1.018	0.996	0.999	0.982	0.983	0.073704	chloroplast				K08913	LHCB2; light-harvesting complex II chlorophyll a/b binding protein 2	sly00196 Photosynthesis - antenna proteins - Solanum lycopersicum (tomato); sly01100 Metabolic pathways - Solanum lycopersicum (tomato);	IPR023329;	Chlorophyll a/b binding protein domain;
A0A1U8ED88	Ras-related protein Rab11B OS=Capsicum annuum OX=4072 GN=T459_23843	T459_23843	24.328	5.769	20.3	4	5	1									cytoplasm	GO:0050794 regulation of cellular process; GO:0044700 single organism signaling; GO:0051716 cellular response to stimulus; GO:0007165 signal transduction; GO:0050789 regulation of biological process; GO:0007154 cell communication; GO:0035556 intracellular signal transduction; GO:0044699 single-organism process; GO:0007264 small GTPase mediated signal transduction; GO:0023052 signaling; GO:0050896…		GO:1901265 nucleoside phosphate binding; GO:0001882 nucleoside binding; GO:0043167 ion binding; GO:0000166 nucleotide binding; GO:0097159 organic cyclic compound binding; GO:1901363 heterocyclic compound binding; GO:0032549 ribonucleoside binding; GO:0097367 carbohydrate derivative binding; GO:0032553 ribonucleotide binding; GO:0005488 binding; GO:0032550 purine ribonucleoside binding; GO:0043168…				IPR005225; IPR027417;	Small GTP-binding protein domain; P-loop containing nucleoside triphosphate hydrolase;	U	KOG0087	GTPase Rab11/YPT3, small G protein superfamily
A0A1U8ED90	Protein transport protein Sec61 subunit alpha OS=Capsicum annuum OX=4072 GN=T459_24740	T459_24740	52.199	2.842	11.2	5	12	2									plasma membrane	GO:0045184 establishment of protein localization; GO:0006810 transport; GO:0071702 organic substance transport; GO:0051179 localization; GO:0033036 macromolecule localization; GO:0008104 protein localization; GO:0015031 protein transport; GO:0051234 establishment of localization;	GO:0016020 membrane;		K10956	SEC61A; protein transport protein SEC61 subunit alpha	sly03060 Protein export - Solanum lycopersicum (tomato); sly04141 Protein processing in endoplasmic reticulum - Solanum lycopersicum (tomato); sly04145 Phagosome - Solanum lycopersicum (tomato);	IPR023201; IPR019561;	SecY subunit domain; Translocon Sec61/SecY, plug domain;	UO	KOG1373	Transport protein Sec61, alpha subunit
A0A1U8EDA7	Uncharacterized protein OS=Capsicum annuum OX=4072 GN=T459_03183	T459_03183	33.116	26.188	19.1	5	5	5	0.805	0.808	0.746	1.192	1.191	1.241	1.536	0.000123166	nucleus			GO:0097159 organic cyclic compound binding; GO:1901363 heterocyclic compound binding; GO:1901265 nucleoside phosphate binding; GO:0005488 binding; GO:0003676 nucleic acid binding; GO:0000166 nucleotide binding; GO:0036094 small molecule binding;	K09537			IPR000504; IPR034254; IPR012677; IPR001623;	RNA recognition motif domain; DNAJC17, RNA recognition motif; Nucleotide-binding alpha-beta plait domain; DnaJ domain;	O	KOG0691	Molecular chaperone (DnaJ superfamily)
A0A1U8EDB4	Isoaspartyl peptidase/L-asparaginase OS=Capsicum annuum OX=4072 GN=T459_10346	T459_10346	33.353	2.3433	6.3	2	2	2	1.022	1.127	1.029	0.975	0.911	0.954	0.894	0.040135	cytoplasm			GO:0016787 hydrolase activity; GO:0003824 catalytic activity;	K13051			IPR029055;	Nucleophile aminohydrolases, N-terminal;	E	KOG1592	Asparaginase
A0A1U8EDD2	Glutathione peroxidase OS=Capsicum annuum OX=4072 GN=T459_23590	T459_23590	18.92	2.1878	15.3	2	2	2									chloroplast	GO:0008152 metabolic process; GO:0006950 response to stress; GO:0055114 oxidation-reduction process; GO:0044710 single-organism metabolic process; GO:0006979 response to oxidative stress; GO:0044699 single-organism process; GO:0050896 response to stimulus;		GO:0016209 antioxidant activity; GO:0004601 peroxidase activity; GO:0004602 glutathione peroxidase activity; GO:0003824 catalytic activity; GO:0016491 oxidoreductase activity; GO:0016684 oxidoreductase activity, acting on peroxide as acceptor;	K00432	gpx; glutathione peroxidase [EC:1.11.1.9]	sly00590 Arachidonic acid metabolism - Solanum lycopersicum (tomato); sly00480 Glutathione metabolism - Solanum lycopersicum (tomato);	IPR012336;	Thioredoxin-like fold;	O	KOG1651	Glutathione peroxidase
A0A1U8EDD6	1-aminocyclopropane-1-carboxylate synthase OS=Capsicum annuum OX=4072 GN=T459_25142	T459_25142	51.22	1.2304	3.3	2	2	2	1.053	0.896	1.012	1.008	1.019	1.012	1.026	0.61954	cytoplasm	GO:0009058 biosynthetic process; GO:0008152 metabolic process;		GO:0097159 organic cyclic compound binding; GO:1901363 heterocyclic compound binding; GO:0003824 catalytic activity; GO:0005488 binding; GO:0043167 ion binding; GO:0043168 anion binding; GO:0048037 cofactor binding; GO:0030170 pyridoxal phosphate binding;	K01762	ACS; 1-aminocyclopropane-1-carboxylate synthase [EC:4.4.1.14]	sly01110 Biosynthesis of secondary metabolites - Solanum lycopersicum (tomato); sly00270 Cysteine and methionine metabolism - Solanum lycopersicum (tomato); sly01100 Metabolic pathways - Solanum lycopersicum (tomato);	IPR015424; IPR004839; IPR015422; IPR015421;	Pyridoxal phosphate-dependent transferase; Aminotransferase, class I/classII; Pyridoxal phosphate-dependent transferase, major region, subdomain 2; Pyridoxal phosphate-dependent transferase, major region, subdomain 1;	T	KOG0256	1-aminocyclopropane-1-carboxylate synthase, and related proteins
A0A1U8EDJ6	Peroxisomal membrane protein 11C OS=Capsicum annuum OX=4072 GN=T459_25097	T459_25097	26.186	31.735	14.5	3	4	3	0.969	0.939	0.993	1.052	1.002	1.022	1.06	0.052523	extracellular	GO:0007031 peroxisome organization; GO:0016043 cellular component organization; GO:0006996 organelle organization; GO:0048285 organelle fission; GO:0009987 cellular process; GO:0071840 cellular component organization or biogenesis; GO:0016559 peroxisome fission;	GO:0016020 membrane; GO:0043229 intracellular organelle; GO:0031903 microbody membrane; GO:0031231 intrinsic component of peroxisomal membrane; GO:0044439 peroxisomal part; GO:0098588 bounding membrane of organelle; GO:0031090 organelle membrane; GO:0005777 peroxisome; GO:0005737 cytoplasm; GO:0044446 intracellular organelle part; GO:0031224 intrinsic component of membrane; GO:0044438 microbody p…							U	KOG4186	Peroxisomal biogenesis protein (peroxin)
A0A1U8EDK9	Uncharacterized protein OS=Capsicum annuum OX=4072 GN=T459_23984	T459_23984	71.09	5.3628	6.1	4	4	4	0.538	0.544	0.542	1.419	1.367	1.551	2.671	0.00146297	cytoplasm							IPR013536; IPR029071; IPR018997;	WLM domain; Ubiquitin-related domain; PUB domain;	D	KOG4842	Protein involved in sister chromatid separation and/or segregation
A0A1U8EDM0	Uncharacterized protein OS=Capsicum annuum OX=4072 GN=T459_24649	T459_24649	44.962	13.579	17.1	6	6	6	0.965	0.96	1.003	1.02	1.012	1.043	1.05	0.041019	cytoplasm	GO:0006508 proteolysis; GO:0008152 metabolic process; GO:0043170 macromolecule metabolic process; GO:0019538 protein metabolic process; GO:0044238 primary metabolic process; GO:0071704 organic substance metabolic process;		GO:0004175 endopeptidase activity; GO:0008233 peptidase activity; GO:0003824 catalytic activity; GO:0005488 binding; GO:0004190 aspartic-type endopeptidase activity; GO:0070011 peptidase activity, acting on L-amino acid peptides; GO:0070001 aspartic-type peptidase activity; GO:0005515 protein binding; GO:0016787 hydrolase activity;	K11885			IPR019103; IPR015940; IPR001995; IPR021109; IPR029071; IPR000626; IPR009060;	Aspartic peptidase, DDI1-type; Ubiquitin-associated domain; Peptidase A2A, retrovirus, catalytic; Aspartic peptidase domain; Ubiquitin-related domain; Ubiquitin domain; UBA-like;	L	KOG0012	DNA damage inducible protein
A0A1U8EDN2	Uncharacterized protein OS=Capsicum annuum OX=4072 GN=T459_23505	T459_23505	19.936	24.276	39.2	4	5	4	0.927	1.012	1.003	1.054	1.007	0.95	1.023	0.60396	chloroplast
A0A1U8EDR8	LIMR family protein OS=Capsicum annuum OX=4072 GN=T459_23441	T459_23441	56.37	3.3998	4.1	2	3	2	1	1.062	1.058	1.029	0.911	0.957	0.929	0.1366	plasma membrane				K14617
A0A1U8EDS3	Uroporphyrinogen decarboxylase OS=Capsicum annuum OX=4072 GN=T459_24733	T459_24733	45.766	30.582	18.1	7	13	7	1.046	1.015	1.061	0.92	0.949	0.99	0.916	0.024038	chloroplast	GO:0051188 cofactor biosynthetic process; GO:0018130 heterocycle biosynthetic process; GO:0006725 cellular aromatic compound metabolic process; GO:0006779 porphyrin-containing compound biosynthetic process; GO:0006807 nitrogen compound metabolic process; GO:1901360 organic cyclic compound metabolic process; GO:0009058 biosynthetic process; GO:1901566 organonitrogen compound biosynthetic process; …		GO:0016831 carboxy-lyase activity; GO:0016829 lyase activity; GO:0004853 uroporphyrinogen decarboxylase activity; GO:0003824 catalytic activity; GO:0016830 carbon-carbon lyase activity;	K01599	hemE; uroporphyrinogen decarboxylase [EC:4.1.1.37]	sly00860 Porphyrin and chlorophyll metabolism - Solanum lycopersicum (tomato); sly01110 Biosynthesis of secondary metabolites - Solanum lycopersicum (tomato); sly01100 Metabolic pathways - Solanum lycopersicum (tomato);	IPR000257;	Uroporphyrinogen decarboxylase (URO-D);	H	KOG2872	Uroporphyrinogen decarboxylase
A0A1U8EDX4	"Prohibitin-6, mitochondrial OS=Capsicum annuum OX=4072 GN=T459_24850"	T459_24850	31.82	53.643	33.2	8	14	8	1.004	1.009	1.025	0.986	0.983	1.055	0.995	0.84096	chloroplast		GO:0016020 membrane;		K17081			IPR001107;	Band 7 domain;	O	KOG3090	Prohibitin-like protein
A0A1U8EDZ7	60S ribosomal protein L8 OS=Capsicum annuum OX=4072 GN=T459_33255	T459_33255	28.111	64.081	27.4	6	9	2	1.045	1.129	0.943	0.931	0.96	1.004	0.929	0.2739	cytoplasm	GO:0006518 peptide metabolic process; GO:0043043 peptide biosynthetic process; GO:0044267 cellular protein metabolic process; GO:0006807 nitrogen compound metabolic process; GO:0009058 biosynthetic process; GO:0043603 cellular amide metabolic process; GO:0044238 primary metabolic process; GO:1901566 organonitrogen compound biosynthetic process; GO:1901576 organic substance biosynthetic process; G…	GO:0005840 ribosome; GO:0043229 intracellular organelle; GO:0043232 intracellular non-membrane-bounded organelle; GO:0044446 intracellular organelle part; GO:0005737 cytoplasm; GO:0032991 macromolecular complex; GO:0044424 intracellular part; GO:0005623 cell; GO:0044422 organelle part; GO:0043228 non-membrane-bounded organelle; GO:0043226 organelle; GO:0015934 large ribosomal subunit; GO:0044391 …	GO:0097159 organic cyclic compound binding; GO:1901363 heterocyclic compound binding; GO:0003723 RNA binding; GO:0005488 binding; GO:0003676 nucleic acid binding; GO:0005198 structural molecule activity; GO:0003735 structural constituent of ribosome;	K02938	RP-L8e; large subunit ribosomal protein L8e	sly03010 Ribosome - Solanum lycopersicum (tomato);	IPR008991; IPR012340; IPR022669; IPR022666; IPR014726; IPR014722;	Translation protein SH3-like domain; Nucleic acid-binding, OB-fold; Ribosomal protein L2, C-terminal; Ribosomal Proteins L2, RNA binding domain; Ribosomal protein L2, domain 3; Ribosomal protein L2 domain 2;	J	KOG2309	60s ribosomal protein L2/L8
A0A1U8EE53	Vesicle-associated protein 1-4 OS=Capsicum annuum OX=4072 GN=T459_34789	T459_34789	25.883	3.9751	8.6	2	2	2	1.075	0.875	0.896	0.993	1.119	1.033	1.105	0.23602	nucleus		GO:0016020 membrane; GO:0043229 intracellular organelle; GO:0005783 endoplasmic reticulum; GO:0042175 nuclear outer membrane-endoplasmic reticulum membrane network; GO:0005737 cytoplasm; GO:0044446 intracellular organelle part; GO:0012505 endomembrane system; GO:0044424 intracellular part; GO:0005623 cell; GO:0044422 organelle part; GO:0043231 intracellular membrane-bounded organelle; GO:0043226 …					IPR008962; IPR000535;	PapD-like; Major sperm protein (MSP) domain;	U	KOG0439	VAMP-associated protein involved in inositol metabolism
A0A1U8EE55	Uncharacterized protein OS=Capsicum annuum OX=4072 GN=T459_24705	T459_24705	62.376	1.1758	1.2	1	1	1	1.125	1.059	0.998	1.057	0.907	0.869	0.89	0.159799	plasma membrane		GO:0016020 membrane; GO:0030119 AP-type membrane coat adaptor complex; GO:0044464 cell part; GO:0005622 intracellular; GO:0098796 membrane protein complex; GO:0044425 membrane part; GO:0048475 coated membrane; GO:0005737 cytoplasm; GO:0032991 macromolecular complex; GO:0044424 intracellular part; GO:0030117 membrane coat; GO:0044599 AP-5 adaptor complex; GO:0005623 cell; GO:0043234 protein comple…	GO:0005488 binding;	K19025			IPR011989; IPR016024;	Armadillo-like helical; Armadillo-type fold;
A0A1U8EE67	2-alkenal reductase (NADP(+)-dependent) OS=Capsicum annuum OX=4072 GN=T459_23741	T459_23741	38.258	98.011	36.6	11	20	9	1.016	1.016	0.938	0.999	1.03	1.014	1.025	0.42474	cytoplasm	GO:0044699 single-organism process; GO:0008152 metabolic process; GO:0055114 oxidation-reduction process; GO:0044710 single-organism metabolic process;		GO:0003824 catalytic activity; GO:0016491 oxidoreductase activity;	K19825			IPR011032; IPR020843; IPR016040; IPR013149;	GroES-like; Polyketide synthase, enoylreductase domain; NAD(P)-binding domain; Alcohol dehydrogenase, C-terminal;	R	KOG1196	Predicted NAD-dependent oxidoreductase
A0A1U8EEA5	Malate dehydrogenase OS=Capsicum annuum OX=4072 GN=T459_23760	T459_23760	35.941	44.044	33.9	10	24	5	0.989	1.037	1.021	1.026	0.994	0.996	0.99	0.58948	chloroplast	GO:0043648 dicarboxylic acid metabolic process; GO:0055114 oxidation-reduction process; GO:0044281 small molecule metabolic process; GO:0044763 single-organism cellular process; GO:0044699 single-organism process; GO:0005975 carbohydrate metabolic process; GO:0044238 primary metabolic process; GO:0044237 cellular metabolic process; GO:0071704 organic substance metabolic process; GO:0008152 metabo…		GO:0016614 oxidoreductase activity, acting on CH-OH group of donors; GO:0016616 oxidoreductase activity, acting on the CH-OH group of donors, NAD or NADP as acceptor; GO:0016615 malate dehydrogenase activity; GO:0003824 catalytic activity; GO:0030060 L-malate dehydrogenase activity; GO:0016491 oxidoreductase activity;	K00026	MDH2; malate dehydrogenase [EC:1.1.1.37]	sly00620 Pyruvate metabolism - Solanum lycopersicum (tomato); sly01110 Biosynthesis of secondary metabolites - Solanum lycopersicum (tomato); sly00630 Glyoxylate and dicarboxylate metabolism - Solanum lycopersicum (tomato); sly00270 Cysteine and methionine metabolism - Solanum lycopersicum (tomato); sly01200 Carbon metabolism - Solanum lycopersicum (tomato); sly00710 Carbon fixation in photosynth…	IPR022383; IPR016040; IPR001236; IPR015955;	Lactate/malate dehydrogenase, C-terminal; NAD(P)-binding domain; Lactate/malate dehydrogenase, N-terminal; Lactate dehydrogenase/glycoside hydrolase, family 4, C-terminal;	C	KOG1494	NAD-dependent malate dehydrogenase
A0A1U8EEI0	Cullin-1 OS=Capsicum annuum OX=4072 GN=T459_02965	T459_02965	86.436	6.0463	7.3	6	6	4	0.999	1.008	0.979	1.014	0.993	1.015	1.012	0.34432	cytoplasm	GO:0043632 modification-dependent macromolecule catabolic process; GO:0044265 cellular macromolecule catabolic process; GO:0051603 proteolysis involved in cellular protein catabolic process; GO:0044257 cellular protein catabolic process; GO:0019941 modification-dependent protein catabolic process; GO:0044267 cellular protein metabolic process; GO:0006511 ubiquitin-dependent protein catabolic proc…	GO:1902494 catalytic complex; GO:0044464 cell part; GO:0005622 intracellular; GO:0031461 cullin-RING ubiquitin ligase complex; GO:0032991 macromolecular complex; GO:0044424 intracellular part; GO:1990234 transferase complex; GO:0000151 ubiquitin ligase complex; GO:0005623 cell;	GO:0005515 protein binding; GO:0031625 ubiquitin protein ligase binding; GO:0044389 ubiquitin-like protein ligase binding; GO:0005488 binding; GO:0019899 enzyme binding;	K03347	CUL1; cullin 1	sly04141 Protein processing in endoplasmic reticulum - Solanum lycopersicum (tomato); sly04120 Ubiquitin mediated proteolysis - Solanum lycopersicum (tomato);	IPR011991; IPR019559; IPR016158; IPR001373; IPR016159;	Winged helix-turn-helix DNA-binding domain; Cullin protein, neddylation domain; Cullin homology; Cullin, N-terminal; Cullin repeat-like-containing domain;	D	KOG2166	Cullins
A0A1U8EEI1	Uncharacterized protein OS=Capsicum annuum OX=4072 GN=T459_24627	T459_24627	40.36	18.247	15.4	5	5	5	0.986	1.042	0.996	0.971	1.048	0.988	0.994	0.8474	chloroplast	GO:0044699 single-organism process; GO:0008152 metabolic process; GO:0055114 oxidation-reduction process; GO:0044710 single-organism metabolic process;		GO:0003824 catalytic activity; GO:0016491 oxidoreductase activity;	K06955			IPR023753;	FAD/NAD(P)-binding domain;
A0A1U8EEN6	Methionine aminopeptidase 2 OS=Capsicum annuum OX=4072 GN=T459_03329	T459_03329	48.494	16.324	18	7	9	7	1.017	1.056	1.055	0.947	0.966	0.979	0.925	0.0075399	nucleus	GO:0006508 proteolysis; GO:0008152 metabolic process; GO:0043170 macromolecule metabolic process; GO:0019538 protein metabolic process; GO:0044238 primary metabolic process; GO:0071704 organic substance metabolic process;		GO:0008233 peptidase activity; GO:0008238 exopeptidase activity; GO:0003824 catalytic activity; GO:0008235 metalloexopeptidase activity; GO:0070011 peptidase activity, acting on L-amino acid peptides; GO:0016787 hydrolase activity; GO:0004177 aminopeptidase activity; GO:0008237 metallopeptidase activity;	K01265			IPR011991; IPR000994;	Winged helix-turn-helix DNA-binding domain; Peptidase M24;	R	KOG2775	Metallopeptidase
A0A1U8EEP3	"3-ketoacyl-CoA thiolase 2, peroxisomal OS=Capsicum annuum OX=4072 GN=T459_23667"	T459_23667	48.775	23.819	24.2	8	11	7	0.961	0.974	0.976	1.004	0.956	1.039	1.03	0.30128	cytoplasm	GO:0008152 metabolic process;		GO:0016746 transferase activity, transferring acyl groups; GO:0016747 transferase activity, transferring acyl groups other than amino-acyl groups; GO:0003824 catalytic activity; GO:0016740 transferase activity;	K07513	ACAA1; acetyl-CoA acyltransferase 1 [EC:2.3.1.16]	sly01110 Biosynthesis of secondary metabolites - Solanum lycopersicum (tomato); sly01100 Metabolic pathways - Solanum lycopersicum (tomato); sly00071 Fatty acid degradation - Solanum lycopersicum (tomato); sly01040 Biosynthesis of unsaturated fatty acids - Solanum lycopersicum (tomato); sly00592 alpha-Linolenic acid metabolism - Solanum lycopersicum (tomato); sly01212 Fatty acid metabolism - Sola…	IPR016039; IPR020616; IPR020617;	Thiolase-like; Thiolase, N-terminal; Thiolase, C-terminal;	I	KOG1389	3-oxoacyl CoA thiolase
A0A1U8EEQ3	Thioredoxin H9 OS=Capsicum annuum OX=4072 GN=T459_23672	T459_23672	16.83	27.211	17.8	3	4	3	0.985	0.973	1	1.029	1.025	0.991	1.029	0.113863	chloroplast	GO:0050794 regulation of cellular process; GO:0042592 homeostatic process; GO:0065008 regulation of biological quality; GO:0050789 regulation of biological process; GO:0045454 cell redox homeostasis; GO:0044763 single-organism cellular process; GO:0019725 cellular homeostasis; GO:0044699 single-organism process; GO:0009987 cellular process; GO:0065007 biological regulation;			K03671			IPR013766; IPR012336;	Thioredoxin domain; Thioredoxin-like fold;	O	KOG0907	Thioredoxin
A0A1U8EES5	Vacuolar-sorting receptor 1 OS=Capsicum annuum OX=4072 GN=T459_23655	T459_23655	69.681	2.0121	8.8	5	8	1	1.069	1.033	1.062	0.92	0.983	0.94	0.899	0.0083961	plasma membrane			GO:0043169 cation binding; GO:0046872 metal ion binding; GO:0005509 calcium ion binding; GO:0005488 binding; GO:0043167 ion binding;				IPR003137; IPR001881;	PA domain; EGF-like calcium-binding domain;
A0A1U8EET6	Acyl carrier protein OS=Capsicum annuum OX=4072 GN=T459_02926	T459_02926	14.014	31.506	12.1	2	6	2	1.005	1.002	0.983	1.038	0.996	0.997	1.014	0.42714	chloroplast	GO:0044711 single-organism biosynthetic process; GO:0016053 organic acid biosynthetic process; GO:0044281 small molecule metabolic process; GO:0044763 single-organism cellular process; GO:0044699 single-organism process; GO:0009058 biosynthetic process; GO:0044255 cellular lipid metabolic process; GO:0006631 fatty acid metabolic process; GO:0044238 primary metabolic process; GO:0044237 cellular m…		GO:0031177 phosphopantetheine binding; GO:0019842 vitamin binding; GO:0072341 modified amino acid binding; GO:0005488 binding; GO:0043167 ion binding; GO:0043168 anion binding; GO:0033218 amide binding; GO:0036094 small molecule binding;				IPR020806; IPR009081;	Polyketide synthase, phosphopantetheine-binding domain; Phosphopantetheine binding ACP domain;	CIQ	KOG1748	Acyl carrier protein/NADH-ubiquinone oxidoreductase, NDUFAB1/SDAP subunit
A0A1U8EEV5	Superoxide dismutase [Cu-Zn] OS=Capsicum annuum OX=4072 GN=T459_02925	T459_02925	15.279	12.03	13.2	2	4	1	1.027	0.997	1.023	0.947	1.051	0.956	0.969	0.4063	cytoplasm	GO:0006801 superoxide metabolic process; GO:0008152 metabolic process; GO:0072593 reactive oxygen species metabolic process; GO:0055114 oxidation-reduction process; GO:0044710 single-organism metabolic process; GO:0044699 single-organism process; GO:0009987 cellular process; GO:0044237 cellular metabolic process;		GO:0004784 superoxide dismutase activity; GO:0003824 catalytic activity; GO:0016721 oxidoreductase activity, acting on superoxide radicals as acceptor; GO:0005488 binding; GO:0043167 ion binding; GO:0016209 antioxidant activity; GO:0043169 cation binding; GO:0046872 metal ion binding; GO:0016491 oxidoreductase activity;	K04565	SOD1; superoxide dismutase, Cu-Zn family [EC:1.15.1.1]	sly04146 Peroxisome - Solanum lycopersicum (tomato);	IPR001424;	Superoxide dismutase, copper/zinc binding domain;	P	KOG0441	Cu2+/Zn2+ superoxide dismutase SOD1
A0A1U8EEW9	"Protein PALE CRESS, chloroplastic OS=Capsicum annuum OX=4072 GN=T459_23581"	T459_23581	36.293	5.4852	9.9	3	3	3									chloroplast
A0A1U8EF03	Photosystem II reaction center Psb28 protein OS=Capsicum annuum OX=4072 GN=T459_23616	T459_23616	20.184	15.724	27.2	4	20	4	1.01	0.931	0.999	1.021	1.03	1.039	1.051	0.124843	chloroplast	GO:0008152 metabolic process; GO:0044237 cellular metabolic process; GO:0009987 cellular process; GO:0015979 photosynthesis;	GO:0016020 membrane; GO:0009523 photosystem II; GO:0098796 membrane protein complex; GO:0009654 photosystem II oxygen evolving complex; GO:0042651 thylakoid membrane; GO:0032991 macromolecular complex; GO:0044424 intracellular part; GO:0005623 cell; GO:0034357 photosynthetic membrane; GO:0009521 photosystem; GO:1902494 catalytic complex; GO:0044425 membrane part; GO:0005622 intracellular; GO:0044…		K08903	psb28; photosystem II 13kDa protein	sly00195 Photosynthesis - Solanum lycopersicum (tomato); sly01100 Metabolic pathways - Solanum lycopersicum (tomato);
A0A1U8EF34	"Photosynthetic NDH subunit of lumenal location 3, chloroplastic OS=Capsicum annuum OX=4072 GN=T459_33250"	T459_33250	25.343	1.7994	7.7	2	3	2	1.055	1.053	1.024	0.892	1.024	0.957	0.917	0.098855	extracellular	GO:0008152 metabolic process; GO:0044237 cellular metabolic process; GO:0009987 cellular process; GO:0015979 photosynthesis;	GO:0016020 membrane; GO:0009523 photosystem II; GO:0019898 extrinsic component of membrane; GO:0098796 membrane protein complex; GO:0009654 photosystem II oxygen evolving complex; GO:0042651 thylakoid membrane; GO:0032991 macromolecular complex; GO:0044424 intracellular part; GO:0005623 cell; GO:0034357 photosynthetic membrane; GO:0009521 photosystem; GO:1902494 catalytic complex; GO:0044425 memb…	GO:0043169 cation binding; GO:0046872 metal ion binding; GO:0005509 calcium ion binding; GO:0005488 binding; GO:0043167 ion binding;	K08901	psbQ; photosystem II oxygen-evolving enhancer protein 3	sly00195 Photosynthesis - Solanum lycopersicum (tomato); sly01100 Metabolic pathways - Solanum lycopersicum (tomato);	IPR023222;	PsbQ-like domain;
A0A1U8EF39	Acyl-coenzyme A oxidase OS=Capsicum annuum OX=4072 GN=T459_24846	T459_24846	76.488	127.82	35.6	19	29	19	0.916	0.922	0.954	1.059	1.043	1.052	1.13	0.00079728	mitochondria	GO:0034440 lipid oxidation; GO:0044699 single-organism process; GO:0044255 cellular lipid metabolic process; GO:0044237 cellular metabolic process; GO:0071704 organic substance metabolic process; GO:0008152 metabolic process; GO:0030258 lipid modification; GO:0044248 cellular catabolic process; GO:0032787 monocarboxylic acid metabolic process; GO:0009987 cellular process; GO:0006629 lipid metabol…	GO:0043226 organelle; GO:0043231 intracellular membrane-bounded organelle; GO:0043229 intracellular organelle; GO:0044464 cell part; GO:0005622 intracellular; GO:0005777 peroxisome; GO:0042579 microbody; GO:0005737 cytoplasm; GO:0044424 intracellular part; GO:0005623 cell; GO:0043227 membrane-bounded organelle; GO:0044444 cytoplasmic part;	GO:0016634 oxidoreductase activity, acting on the CH-CH group of donors, oxygen as acceptor; GO:1901265 nucleoside phosphate binding; GO:0050660 flavin adenine dinucleotide binding; GO:0043167 ion binding; GO:0003997 acyl-CoA oxidase activity; GO:0000166 nucleotide binding; GO:0048037 cofactor binding; GO:0016491 oxidoreductase activity; GO:0016627 oxidoreductase activity, acting on the CH-CH gro…	K00232	E1.3.3.6; acyl-CoA oxidase [EC:1.3.3.6]	sly01040 Biosynthesis of unsaturated fatty acids - Solanum lycopersicum (tomato); sly01110 Biosynthesis of secondary metabolites - Solanum lycopersicum (tomato); sly00592 alpha-Linolenic acid metabolism - Solanum lycopersicum (tomato); sly01212 Fatty acid metabolism - Solanum lycopersicum (tomato); sly04146 Peroxisome - Solanum lycopersicum (tomato); sly01100 Metabolic pathways - Solanum lycopers…	IPR009100; IPR006091; IPR002655; IPR009075;	Acyl-CoA dehydrogenase/oxidase, N-terminal and middle domain; Acyl-CoA oxidase/dehydrogenase, central domain; Acyl-CoA oxidase, C-terminal; Acyl-CoA dehydrogenase/oxidase C-terminal;	IQ	KOG0135	Pristanoyl-CoA/acyl-CoA oxidase
A0A1U8EF45	"Peptidyl-prolyl cis-trans isomerase FKBP16-1, chloroplastic OS=Capsicum annuum OX=4072 GN=T459_24647"	T459_24647	23.475	2.9664	5.2	1	3	1	1.07	0.944	0.991	1.051	0.991	0.957	0.998	0.97676	chloroplast							IPR001179;	FKBP-type peptidyl-prolyl cis-trans isomerase domain;	O	KOG0552	FKBP-type peptidyl-prolyl cis-trans isomerase
A0A1U8EF87	Calcineurin B-like protein 3 OS=Capsicum annuum OX=4072 GN=T459_24645	T459_24645	25.461	3.8358	15.8	4	4	4	0.887	0.923	0.98	1.129	1.029	1.055	1.152	0.024397	cytoplasm			GO:0043169 cation binding; GO:0046872 metal ion binding; GO:0005509 calcium ion binding; GO:0005488 binding; GO:0043167 ion binding;	K06268			IPR002048; IPR011992;	EF-hand domain; EF-hand domain pair;	T	KOG0034	Ca2+/calmodulin-dependent protein phosphatase (calcineurin subunit B), EF-Hand superfamily protein
A0A1U8EFD1	Uncharacterized protein OS=Capsicum annuum OX=4072 GN=T459_23511	T459_23511	60.522	19.924	10.1	5	6	4	0.465	0.501	0.519	1.594	1.513	1.583	3.158	2.9435e-06	nucleus	GO:0050794 regulation of cellular process; GO:0010468 regulation of gene expression; GO:0006355 regulation of transcription, DNA-templated; GO:0031326 regulation of cellular biosynthetic process; GO:0080090 regulation of primary metabolic process; GO:0060255 regulation of macromolecule metabolic process; GO:0019219 regulation of nucleobase-containing compound metabolic process; GO:0010556 regulat…		GO:0097159 organic cyclic compound binding; GO:1901363 heterocyclic compound binding; GO:0003677 DNA binding; GO:0005488 binding; GO:0001071 nucleic acid binding transcription factor activity; GO:0003676 nucleic acid binding; GO:0043565 sequence-specific DNA binding; GO:0003700 transcription factor activity, sequence-specific DNA binding;	K13424	WRKY33; WRKY transcription factor 33	sly04016 MAPK signaling pathway - plant - Solanum lycopersicum (tomato); sly04626 Plant-pathogen interaction - Solanum lycopersicum (tomato);	IPR003657;	WRKY domain;
A0A1U8EFG8	Uncharacterized protein OS=Capsicum annuum OX=4072 GN=T459_23527	T459_23527	35.698	14.994	17	5	9	5	1.024	1.025	1.017	0.996	0.971	0.979	0.961	0.0071368	chloroplast
A0A1U8EFM0	"Ribose-phosphate pyrophosphokinase 1, chloroplastic OS=Capsicum annuum OX=4072 GN=T459_25409"	T459_25409	42.992	2.8901	5.5	2	2	2									chloroplast	GO:0009116 nucleoside metabolic process; GO:0009165 nucleotide biosynthetic process; GO:0006725 cellular aromatic compound metabolic process; GO:0009117 nucleotide metabolic process; GO:0044699 single-organism process; GO:0009058 biosynthetic process; GO:0009156 ribonucleoside monophosphate biosynthetic process; GO:0044237 cellular metabolic process; GO:0006796 phosphate-containing compound metab…		GO:0000287 magnesium ion binding; GO:0004749 ribose phosphate diphosphokinase activity; GO:0003824 catalytic activity; GO:0005488 binding; GO:0043167 ion binding; GO:0046872 metal ion binding; GO:0043169 cation binding; GO:0016778 diphosphotransferase activity; GO:0016740 transferase activity; GO:0016772 transferase activity, transferring phosphorus-containing groups;	K00948	PRPS; ribose-phosphate pyrophosphokinase [EC:2.7.6.1]	sly01110 Biosynthesis of secondary metabolites - Solanum lycopersicum (tomato); sly00230 Purine metabolism - Solanum lycopersicum (tomato); sly01200 Carbon metabolism - Solanum lycopersicum (tomato); sly01230 Biosynthesis of amino acids - Solanum lycopersicum (tomato); sly01100 Metabolic pathways - Solanum lycopersicum (tomato); sly00030 Pentose phosphate pathway - Solanum lycopersicum (tomato);	IPR000836; IPR029099; IPR029057;	Phosphoribosyltransferase domain; Ribose-phosphate pyrophosphokinase, N-terminal domain; Phosphoribosyltransferase-like;	FE	KOG1448	Ribose-phosphate pyrophosphokinase
A0A1U8EFP6	RAN GTPase-activating protein 1 OS=Capsicum annuum OX=4072 GN=T459_23324	T459_23324	58.067	29.064	13.9	7	9	7	0.989	0.997	1.002	1.048	0.963	0.937	0.987	0.70862	chloroplast			GO:0005515 protein binding; GO:0005488 binding;	K14319	RANGAP1; Ran GTPase-activating protein 1	sly03013 RNA transport - Solanum lycopersicum (tomato);	IPR025265; IPR032675;	WPP domain; Leucine-rich repeat domain, L domain-like;	AYT	KOG1909	Ran GTPase-activating protein
A0A1U8EFR8	"50S ribosomal protein L5, chloroplastic OS=Capsicum annuum OX=4072 GN=T459_33194"	T459_33194	29.884	235.47	58.3	14	40	14	1.028	1.053	1.017	0.971	0.959	0.976	0.938	0.0051817	chloroplast	GO:0006518 peptide metabolic process; GO:0043043 peptide biosynthetic process; GO:0044267 cellular protein metabolic process; GO:0006807 nitrogen compound metabolic process; GO:0009058 biosynthetic process; GO:0043603 cellular amide metabolic process; GO:0044238 primary metabolic process; GO:1901566 organonitrogen compound biosynthetic process; GO:1901576 organic substance biosynthetic process; G…	GO:0005840 ribosome; GO:0043226 organelle; GO:0043229 intracellular organelle; GO:0043232 intracellular non-membrane-bounded organelle; GO:0044464 cell part; GO:0005622 intracellular; GO:0005737 cytoplasm; GO:0032991 macromolecular complex; GO:0044424 intracellular part; GO:1990904 ribonucleoprotein complex; GO:0005623 cell; GO:0030529 intracellular ribonucleoprotein complex; GO:0044444 cytoplasm…	GO:0003735 structural constituent of ribosome; GO:0005198 structural molecule activity;	K02931	RP-L5; large subunit ribosomal protein L5	sly03010 Ribosome - Solanum lycopersicum (tomato);	IPR022803; IPR031309; IPR031310;	Ribosomal protein L5 domain; Ribosomal protein L5, C-terminal; Ribosomal protein L5, N-terminal;	J	KOG0398	Mitochondrial/chloroplast ribosomal protein L5/L7
A0A1U8EFW0	Adenosine kinase OS=Capsicum annuum OX=4072 GN=T459_22607	T459_22607	37.26	194.57	37.8	9	26	5	1.023	1.038	0.971	1.005	0.986	1.011	0.99	0.68018	cytoplasm	GO:0009116 nucleoside metabolic process; GO:0042278 purine nucleoside metabolic process; GO:0006725 cellular aromatic compound metabolic process; GO:0044699 single-organism process; GO:0046129 purine ribonucleoside biosynthetic process; GO:0009163 nucleoside biosynthetic process; GO:0009058 biosynthetic process; GO:1901566 organonitrogen compound biosynthetic process; GO:0043174 nucleoside salvag…		GO:0016301 kinase activity; GO:0019206 nucleoside kinase activity; GO:0016773 phosphotransferase activity, alcohol group as acceptor; GO:0003824 catalytic activity; GO:0019205 nucleobase-containing compound kinase activity; GO:0016740 transferase activity; GO:0004001 adenosine kinase activity; GO:0016772 transferase activity, transferring phosphorus-containing groups;	K00856	E2.7.1.20; adenosine kinase [EC:2.7.1.20]	sly00230 Purine metabolism - Solanum lycopersicum (tomato); sly01100 Metabolic pathways - Solanum lycopersicum (tomato);	IPR011611; IPR029056;	Carbohydrate kinase PfkB; Ribokinase-like;	G	KOG2854	Possible pfkB family carbohydrate kinase
A0A1U8EG73	"Fructose-1,6-bisphosphatase, chloroplastic OS=Capsicum annuum OX=4072 GN=T459_23150"	T459_23150	44.2	323.31	32.9	13	44	8	0.987	0.965	0.986	0.989	1.036	1.005	1.031	0.118203	nucleus	GO:0008152 metabolic process; GO:0005975 carbohydrate metabolic process; GO:0044238 primary metabolic process; GO:0071704 organic substance metabolic process;		GO:0019203 carbohydrate phosphatase activity; GO:0042578 phosphoric ester hydrolase activity; GO:0003824 catalytic activity; GO:0016791 phosphatase activity; GO:0016788 hydrolase activity, acting on ester bonds; GO:0016787 hydrolase activity; GO:0050308 sugar-phosphatase activity; GO:0042132 fructose 1,6-bisphosphate 1-phosphatase activity;	K03841	FBP; fructose-1,6-bisphosphatase I [EC:3.1.3.11]	sly01110 Biosynthesis of secondary metabolites - Solanum lycopersicum (tomato); sly01200 Carbon metabolism - Solanum lycopersicum (tomato); sly00710 Carbon fixation in photosynthetic organisms - Solanum lycopersicum (tomato); sly00051 Fructose and mannose metabolism - Solanum lycopersicum (tomato); sly00010 Glycolysis / Gluconeogenesis - Solanum lycopersicum (tomato); sly01100 Metabolic pathways …	IPR033391;	Fructose-1-6-bisphosphatase class I, N-terminal;	G	KOG1458	Fructose-1,6-bisphosphatase
A0A1U8EG99	Uncharacterized protein OS=Capsicum annuum OX=4072 GN=T459_22472	T459_22472	109.93	8.9582	1.7	1	1	1									nucleus			GO:0046872 metal ion binding; GO:0043169 cation binding; GO:0005488 binding; GO:0043167 ion binding;	K14400	PCF11; pre-mRNA cleavage complex 2 protein Pcf11	sly03015 mRNA surveillance pathway - Solanum lycopersicum (tomato);	IPR006903; IPR006569; IPR007087; IPR008942;	RNA polymerase II-binding domain; CID domain; Zinc finger, C2H2; ENTH/VHS;	A	KOG2071	mRNA cleavage and polyadenylation factor I/II complex, subunit Pcf11
A0A1U8EGA1	Aldo-keto reductase family 4 member C11 OS=Capsicum annuum OX=4072 GN=T459_22967	T459_22967	35.226	20.347	32.5	10	12	8	0.994	1	1.027	0.989	0.983	1.006	0.986	0.30638	cytoplasm	GO:0044699 single-organism process; GO:0008152 metabolic process; GO:0055114 oxidation-reduction process; GO:0044710 single-organism metabolic process;		GO:0003824 catalytic activity; GO:0016491 oxidoreductase activity;	K00002	AKR1A1; alcohol dehydrogenase (NADP+) [EC:1.1.1.2]	sly01110 Biosynthesis of secondary metabolites - Solanum lycopersicum (tomato); sly00040 Pentose and glucuronate interconversions - Solanum lycopersicum (tomato); sly00561 Glycerolipid metabolism - Solanum lycopersicum (tomato); sly00010 Glycolysis / Gluconeogenesis - Solanum lycopersicum (tomato); sly01100 Metabolic pathways - Solanum lycopersicum (tomato);	IPR023210;	NADP-dependent oxidoreductase domain;	R	KOG1577	Aldo/keto reductase family proteins
A0A1U8EGC7	"Protein SCO1-like protein 1, mitochondrial OS=Capsicum annuum OX=4072 GN=T459_22354"	T459_22354	35.218	2.2294	4.8	1	1	1									chloroplast	GO:0050794 regulation of cellular process; GO:0042592 homeostatic process; GO:0065008 regulation of biological quality; GO:0050789 regulation of biological process; GO:0045454 cell redox homeostasis; GO:0044763 single-organism cellular process; GO:0019725 cellular homeostasis; GO:0044699 single-organism process; GO:0009987 cellular process; GO:0065007 biological regulation;			K07152			IPR013766; IPR012336;	Thioredoxin domain; Thioredoxin-like fold;	C	KOG2792	Putative cytochrome C oxidase assembly protein
A0A1U8EGD8	Ribose-phosphate pyrophosphokinase 4 OS=Capsicum annuum OX=4072 GN=T459_24795	T459_24795	35.974	23.287	18.7	6	8	5	1.014	1.01	1.012	0.993	0.969	1.009	0.979	0.20666	cytoplasm	GO:0009116 nucleoside metabolic process; GO:0006725 cellular aromatic compound metabolic process; GO:0044281 small molecule metabolic process; GO:0044763 single-organism cellular process; GO:0044699 single-organism process; GO:1901360 organic cyclic compound metabolic process; GO:0006807 nitrogen compound metabolic process; GO:0044238 primary metabolic process; GO:0044237 cellular metabolic proce…						IPR000836; IPR029057;	Phosphoribosyltransferase domain; Phosphoribosyltransferase-like;	FE	KOG1448	Ribose-phosphate pyrophosphokinase
A0A1U8EGF1	Coatomer subunit beta OS=Capsicum annuum OX=4072 GN=T459_03385	T459_03385	105.75	79.235	31.1	24	32	12	1.023	0.991	0.999	1.021	0.999	0.968	0.992	0.66514	plasma membrane	GO:0045184 establishment of protein localization; GO:0006810 transport; GO:0046907 intracellular transport; GO:0070727 cellular macromolecule localization; GO:0051649 establishment of localization in cell; GO:0016192 vesicle-mediated transport; GO:0006886 intracellular protein transport; GO:0071702 organic substance transport; GO:0008104 protein localization; GO:0033036 macromolecule localization…	GO:0016020 membrane; GO:0031410 cytoplasmic vesicle; GO:0031090 organelle membrane; GO:0098796 membrane protein complex; GO:0030137 COPI-coated vesicle; GO:0031982 vesicle; GO:0030660 Golgi-associated vesicle membrane; GO:0005737 cytoplasm; GO:0044433 cytoplasmic vesicle part; GO:0032991 macromolecular complex; GO:0044424 intracellular part; GO:0030120 vesicle coat; GO:0030663 COPI-coated vesicle…	GO:0005198 structural molecule activity; GO:0005488 binding;	K17301			IPR011710; IPR011989; IPR016024; IPR029446; IPR002553;	Coatomer beta subunit, C-terminal; Armadillo-like helical; Armadillo-type fold; Coatomer beta subunit, appendage platform domain; Clathrin/coatomer adaptor, adaptin-like, N-terminal;	U	KOG1058	Vesicle coat complex COPI, beta subunit
A0A1U8EGH6	Signal recognition particle protein OS=Capsicum annuum OX=4072 GN=T459_22412	T459_22412	62.253	57.308	29.2	15	27	15	1.032	1.056	1.042	0.953	0.933	0.963	0.91	0.00119736	chloroplast	GO:0046907 intracellular transport; GO:0072599 establishment of protein localization to endoplasmic reticulum; GO:0072594 establishment of protein localization to organelle; GO:0072657 protein localization to membrane; GO:0045047 protein targeting to ER; GO:0071702 organic substance transport; GO:0006613 cotranslational protein targeting to membrane; GO:0015031 protein transport; GO:0051641 cellu…	GO:0044464 cell part; GO:0005622 intracellular; GO:0048500 signal recognition particle; GO:0005737 cytoplasm; GO:0032991 macromolecular complex; GO:0044424 intracellular part; GO:1990904 ribonucleoprotein complex; GO:0030529 intracellular ribonucleoprotein complex; GO:0005623 cell; GO:0044444 cytoplasmic part;	GO:0003723 RNA binding; GO:1901265 nucleoside phosphate binding; GO:0001882 nucleoside binding; GO:0043167 ion binding; GO:0016817 hydrolase activity, acting on acid anhydrides; GO:0016787 hydrolase activity; GO:0000166 nucleotide binding; GO:0017111 nucleoside-triphosphatase activity; GO:0008312 7S RNA binding; GO:0097159 organic cyclic compound binding; GO:1901363 heterocyclic compound binding;…	K03106	SRP54; signal recognition particle subunit SRP54 [EC:3.6.5.4]	sly03060 Protein export - Solanum lycopersicum (tomato);	IPR003593; IPR013822; IPR004125; IPR000897; IPR027417;	AAA+ ATPase domain; Signal recognition particle, SRP54 subunit, helical bundle; Signal recognition particle, SRP54 subunit, M-domain; Signal recognition particle, SRP54 subunit, GTPase domain; P-loop containing nucleoside triphosphate hydrolase;	U	KOG0780	Signal recognition particle, subunit Srp54
A0A1U8EGJ4	"Thioredoxin M1, chloroplastic OS=Capsicum annuum OX=4072 GN=T459_33291"	T459_33291	18.92	99.334	38.5	7	29	3	0.976	0.979	0.972	1.007	0.993	1.07	1.049	0.176885	chloroplast	GO:0050794 regulation of cellular process; GO:0065008 regulation of biological quality; GO:0045454 cell redox homeostasis; GO:0044281 small molecule metabolic process; GO:0044763 single-organism cellular process; GO:0019725 cellular homeostasis; GO:0018904 ether metabolic process; GO:0044699 single-organism process; GO:0071704 organic substance metabolic process; GO:0042592 homeostatic process; G…		GO:0015035 protein disulfide oxidoreductase activity; GO:0016667 oxidoreductase activity, acting on a sulfur group of donors; GO:0015036 disulfide oxidoreductase activity; GO:0003824 catalytic activity; GO:0016491 oxidoreductase activity;	K03671			IPR013766; IPR012336;	Thioredoxin domain; Thioredoxin-like fold;	O	KOG0910	Thioredoxin-like protein
A0A1U8EGK6	Sorting nexin 1 OS=Capsicum annuum OX=4072 GN=T459_22430	T459_22430	46.756	39.654	28.5	11	15	11	1.001	0.992	1.015	0.999	1.016	1.001	1.003	0.76974	chloroplast			GO:0008289 lipid binding; GO:0043168 anion binding; GO:0005488 binding; GO:0035091 phosphatidylinositol binding; GO:0005543 phospholipid binding; GO:0043167 ion binding;	K17917	SNX1_2; sorting nexin-1/2	sly04144 Endocytosis - Solanum lycopersicum (tomato);	IPR015404; IPR027267; IPR001683;	Sorting nexin Vps5-like, C-terminal; Arfaptin homology (AH) domain/BAR domain; Phox homologous domain;	U	KOG2273	Membrane coat complex Retromer, subunit VPS5/SNX1, Sorting nexins, and related PX domain-containing proteins
A0A1U8EGL7	"Ribulose bisphosphate carboxylase/oxygenase activase 2, chloroplastic OS=Capsicum annuum OX=4072 GN=T459_25644"	T459_25644	48.298	323.31	65.1	25	234	12	1.014	0.993	1.012	0.997	0.98	0.99	0.983	0.105676	chloroplast			GO:0005524 ATP binding; GO:1901265 nucleoside phosphate binding; GO:0001882 nucleoside binding; GO:0043167 ion binding; GO:0000166 nucleotide binding; GO:0097159 organic cyclic compound binding; GO:1901363 heterocyclic compound binding; GO:0032549 ribonucleoside binding; GO:0097367 carbohydrate derivative binding; GO:0032553 ribonucleotide binding; GO:0005488 binding; GO:0032550 purine ribonucleo…				IPR003959; IPR027417;	ATPase, AAA-type, core; P-loop containing nucleoside triphosphate hydrolase;	O	KOG0651	26S proteasome regulatory complex, ATPase RPT4
A0A1U8EGP1	Ras-related protein RABE1e OS=Capsicum annuum OX=4072 GN=T459_25685	T459_25685	23.826	22.605	23.1	4	8	1	0.993	0.987	0.955	1.038	1.015	1.016	1.046	0.03418	cytoplasm	GO:0050794 regulation of cellular process; GO:0044700 single organism signaling; GO:0051716 cellular response to stimulus; GO:0007165 signal transduction; GO:0050789 regulation of biological process; GO:0007154 cell communication; GO:0035556 intracellular signal transduction; GO:0044699 single-organism process; GO:0007264 small GTPase mediated signal transduction; GO:0023052 signaling; GO:0050896…		GO:1901265 nucleoside phosphate binding; GO:0001882 nucleoside binding; GO:0043167 ion binding; GO:0000166 nucleotide binding; GO:0097159 organic cyclic compound binding; GO:1901363 heterocyclic compound binding; GO:0032549 ribonucleoside binding; GO:0097367 carbohydrate derivative binding; GO:0032553 ribonucleotide binding; GO:0005488 binding; GO:0032550 purine ribonucleoside binding; GO:0043168…	K07901	RAB8A; Ras-related protein Rab-8A	sly04144 Endocytosis - Solanum lycopersicum (tomato);	IPR005225; IPR027417;	Small GTP-binding protein domain; P-loop containing nucleoside triphosphate hydrolase;	TU	KOG0078	GTP-binding protein SEC4, small G protein superfamily, and related Ras family GTP-binding proteins
A0A1U8EGQ0	Uncharacterized protein OS=Capsicum annuum OX=4072 GN=T459_03314	T459_03314	43.567	1.1468	2.1	1	1	1	1.041	1	1.102	0.954	0.857	1.064	0.915	0.24952	cytoplasm	GO:0018130 heterocycle biosynthetic process; GO:0006725 cellular aromatic compound metabolic process; GO:0097659 nucleic acid-templated transcription; GO:0034654 nucleobase-containing compound biosynthetic process; GO:1901360 organic cyclic compound metabolic process; GO:0006807 nitrogen compound metabolic process; GO:0032774 RNA biosynthetic process; GO:0009058 biosynthetic process; GO:0044238 p…		GO:0097159 organic cyclic compound binding; GO:1901363 heterocyclic compound binding; GO:0003677 DNA binding; GO:0016779 nucleotidyltransferase activity; GO:0034062 5'-3' RNA polymerase activity; GO:0003824 catalytic activity; GO:0097747 RNA polymerase activity; GO:0005488 binding; GO:0046983 protein dimerization activity; GO:0003676 nucleic acid binding; GO:0003899 DNA-directed 5'-3' RNA polymer…	K03027	RPC40; DNA-directed RNA polymerases I and III subunit RPAC1	sly03020 RNA polymerase - Solanum lycopersicum (tomato); sly00230 Purine metabolism - Solanum lycopersicum (tomato); sly01100 Metabolic pathways - Solanum lycopersicum (tomato); sly00240 Pyrimidine metabolism - Solanum lycopersicum (tomato);	IPR011262; IPR011263; IPR009025;	DNA-directed RNA polymerase, insert domain; DNA-directed RNA polymerase, RpoA/D/Rpb3-type; DNA-directed RNA polymerase, RBP11-like dimerisation domain;	K	KOG1521	RNA polymerase I and III, subunit RPA40/RPC40
A0A1U8EGR2	Vesicle-associated protein 1-1 OS=Capsicum annuum OX=4072 GN=T459_03311	T459_03311	26.353	1.1485	3.3	1	1	1	0.949	0.921	0.936	1.018	1.071	1.103	1.138	0.0067784	Golgi apparatus		GO:0016020 membrane; GO:0043229 intracellular organelle; GO:0005783 endoplasmic reticulum; GO:0042175 nuclear outer membrane-endoplasmic reticulum membrane network; GO:0005737 cytoplasm; GO:0044446 intracellular organelle part; GO:0012505 endomembrane system; GO:0044424 intracellular part; GO:0005623 cell; GO:0044422 organelle part; GO:0043231 intracellular membrane-bounded organelle; GO:0043226 …					IPR008962; IPR000535;	PapD-like; Major sperm protein (MSP) domain;	U	KOG0439	VAMP-associated protein involved in inositol metabolism
A0A1U8EGS6	Golgi SNAP receptor complex member 1 OS=Capsicum annuum OX=4072 GN=T459_03308	T459_03308	27.057	3.6344	15.6	3	3	3									Golgi apparatus	GO:0006810 transport; GO:0046907 intracellular transport; GO:0051649 establishment of localization in cell; GO:0016192 vesicle-mediated transport; GO:0048193 Golgi vesicle transport; GO:0051179 localization; GO:0006888 ER to Golgi vesicle-mediated transport; GO:0051641 cellular localization; GO:0051234 establishment of localization;	GO:0043229 intracellular organelle; GO:0016020 membrane; GO:0098588 bounding membrane of organelle; GO:0031090 organelle membrane; GO:0005737 cytoplasm; GO:0044446 intracellular organelle part; GO:0005801 cis-Golgi network; GO:0000139 Golgi membrane; GO:0012505 endomembrane system; GO:0031224 intrinsic component of membrane; GO:0044424 intracellular part; GO:0005623 cell; GO:0016021 integral comp…		K08495	GOSR1; golgi SNAP receptor complex member 1	sly04130 SNARE interactions in vesicular transport - Solanum lycopersicum (tomato);			U	KOG3208	SNARE protein GS28
A0A1U8EGT3	Eukaryotic translation initiation factor 3 subunit A OS=Capsicum annuum OX=4072 GN=T459_22918	T459_22918	111.86	64.125	20.9	18	26	18	0.998	0.999	1.038	0.994	0.982	1.025	0.989	0.56888	cytoplasm		GO:0044464 cell part; GO:0005622 intracellular; GO:0005737 cytoplasm; GO:0032991 macromolecular complex; GO:0044424 intracellular part; GO:0043234 protein complex; GO:0005623 cell; GO:0044444 cytoplasmic part; GO:0005852 eukaryotic translation initiation factor 3 complex;	GO:0005515 protein binding; GO:0005488 binding;	K03254	EIF3A; translation initiation factor 3 subunit A	sly03013 RNA transport - Solanum lycopersicum (tomato);	IPR000717;	Proteasome component (PCI) domain;	J	KOG2072	Translation initiation factor 3, subunit a (eIF-3a)
A0A1U8EGX0	Uncharacterized protein OS=Capsicum annuum OX=4072 GN=T459_24955	T459_24955	12.808	2.4655	7.7	1	2	1	1.595	1.569	1.488	0.482	0.465	0.467	0.304	4.7903e-07	extracellular
A0A1U8EGY9	Serine/threonine-protein phosphatase OS=Capsicum annuum OX=4072 GN=T459_03034	T459_03034	35.64	38.888	32.1	8	13	6	0.954	1.006	1.019	1.024	0.94	1.04	1.008	0.84512	cytoplasm			GO:0016787 hydrolase activity; GO:0003824 catalytic activity;	K04382	PPP2C; serine/threonine-protein phosphatase 2A catalytic subunit [EC:3.1.3.16]	sly03015 mRNA surveillance pathway - Solanum lycopersicum (tomato); sly04136 Autophagy - other - Solanum lycopersicum (tomato);	IPR029052; IPR004843; IPR006186;	Metallo-dependent phosphatase-like; Calcineurin-like phosphoesterase domain, ApaH type; Serine/threonine-specific protein phosphatase/bis(5-nucleosyl)-tetraphosphatase;	T	KOG0371	Serine/threonine protein phosphatase 2A, catalytic subunit
A0A1U8EH43	Uncharacterized protein OS=Capsicum annuum OX=4072 GN=T459_25829	T459_25829	26.864	33.356	6.6	1	2	1	1.035	1.05	0.989	0.936	0.951	1.049	0.955	0.30554	cytoplasm	GO:0044699 single-organism process; GO:0008152 metabolic process; GO:0044238 primary metabolic process; GO:0044710 single-organism metabolic process; GO:0006629 lipid metabolic process; GO:0071704 organic substance metabolic process;			K12382			IPR008139; IPR011001; IPR007856; IPR008138;	Saposin B type domain; Saposin-like; Saposin-like type B, region 1; Saposin B type, region 2;	IG	KOG1340	Prosaposin
A0A1U8EH62	Heparanase-like protein 3 OS=Capsicum annuum OX=4072 GN=T459_25869	T459_25869	59.983	1.5637	3.1	2	2	1	1.117	0.997	0.994	0.953	0.975	0.971	0.933	0.155657	chloroplast	GO:0008152 metabolic process; GO:0005975 carbohydrate metabolic process; GO:0044238 primary metabolic process; GO:0071704 organic substance metabolic process;	GO:0016020 membrane;	GO:0016787 hydrolase activity; GO:0003824 catalytic activity; GO:0016798 hydrolase activity, acting on glycosyl bonds;	K07964	HPSE; heparanase [EC:3.2.1.166]	sly00531 Glycosaminoglycan degradation - Solanum lycopersicum (tomato); sly01100 Metabolic pathways - Solanum lycopersicum (tomato);	IPR017853; IPR013781;	Glycoside hydrolase superfamily; Glycoside hydrolase, catalytic domain;
A0A1U8EHB1	Uncharacterized protein OS=Capsicum annuum OX=4072 GN=T459_03349	T459_03349	31.648	1.6991	5.5	1	1	1									mitochondria	GO:0044085 cellular component biogenesis; GO:0006457 protein folding; GO:0016043 cellular component organization; GO:0071822 protein complex subunit organization; GO:0022607 cellular component assembly; GO:0065003 macromolecular complex assembly; GO:0070271 protein complex biogenesis; GO:0009987 cellular process; GO:0006461 protein complex assembly; GO:0071840 cellular component organization or b…		GO:0005515 protein binding; GO:0051087 chaperone binding; GO:0005488 binding;	K04082			IPR009073; IPR001623;	Co-chaperone HscB, C-terminal oligomerisation domain; DnaJ domain;	O	KOG3192	Mitochondrial J-type chaperone
A0A1U8EHD5	Calcium-binding protein CAST OS=Capsicum annuum OX=4072 GN=T459_25401	T459_25401	22.555	28.813	14.5	2	2	2	0.696	0.633	0.612	1.406	1.303	1.32	2.076	8.2351e-05	cytoplasm			GO:0043169 cation binding; GO:0046872 metal ion binding; GO:0005509 calcium ion binding; GO:0005488 binding; GO:0043167 ion binding;	K13448	CML; calcium-binding protein CML	sly04626 Plant-pathogen interaction - Solanum lycopersicum (tomato);	IPR011992; IPR002048;	EF-hand domain pair; EF-hand domain;	T	KOG0027	Calmodulin and related proteins (EF-Hand superfamily)
A0A1U8EHG4	Uncharacterized protein OS=Capsicum annuum OX=4072 GN=T459_11705	T459_11705	42.418	13.095	14.7	5	6	5	0.987	1.006	1.02	1.044	0.933	1.023	0.996	0.88728	chloroplast	GO:1901071 glucosamine-containing compound metabolic process; GO:0006030 chitin metabolic process; GO:0006026 aminoglycan catabolic process; GO:1901136 carbohydrate derivative catabolic process; GO:0006807 nitrogen compound metabolic process; GO:0006032 chitin catabolic process; GO:0005975 carbohydrate metabolic process; GO:0044238 primary metabolic process; GO:1901072 glucosamine-containing comp…		GO:0004553 hydrolase activity, hydrolyzing O-glycosyl compounds; GO:0016787 hydrolase activity; GO:0004568 chitinase activity; GO:0003824 catalytic activity; GO:0016798 hydrolase activity, acting on glycosyl bonds;	K01183	E3.2.1.14; chitinase [EC:3.2.1.14]	sly01100 Metabolic pathways - Solanum lycopersicum (tomato); sly00520 Amino sugar and nucleotide sugar metabolism - Solanum lycopersicum (tomato);	IPR001223; IPR011583; IPR029070; IPR017853; IPR013781;	Glycoside hydrolase family 18, catalytic domain; Chitinase II; Chitinase insertion domain; Glycoside hydrolase superfamily; Glycoside hydrolase, catalytic domain;	G	KOG2806	Chitinase
A0A1U8EHG9	"Putative 3-hydroxyisobutyrate dehydrogenase-like 2, mitochondrial OS=Capsicum annuum OX=4072 GN=T459_03086"	T459_03086	31.949	28.324	26.2	6	7	6	0.907	0.988	1.065	1.021	1.035	1.012	1.036	0.50306	chloroplast	GO:0044699 single-organism process; GO:0008152 metabolic process; GO:0055114 oxidation-reduction process; GO:0044710 single-organism metabolic process;		GO:0097159 organic cyclic compound binding; GO:1901363 heterocyclic compound binding; GO:0016614 oxidoreductase activity, acting on CH-OH group of donors; GO:0016616 oxidoreductase activity, acting on the CH-OH group of donors, NAD or NADP as acceptor; GO:0004616 phosphogluconate dehydrogenase (decarboxylating) activity; GO:1901265 nucleoside phosphate binding; GO:0051287 NAD binding; GO:0003824 …				IPR006115; IPR013328; IPR008927; IPR016040; IPR029154;	6-phosphogluconate dehydrogenase, NADP-binding; 6-phosphogluconate dehydrogenase, domain 2; 6-phosphogluconate dehydrogenase C-terminal domain-like; NAD(P)-binding domain; 3-hydroxyisobutyrate dehydrogenase, NAD-binding domain;	R	KOG0409	Predicted dehydrogenase
A0A1U8EHJ3	"Photosynthetic NDH subunit of lumenal location 1, chloroplastic OS=Capsicum annuum OX=4072 GN=T459_25214"	T459_25214	26.298	28.232	40.1	8	14	8	0.976	1.018	0.985	0.993	1.011	1.06	1.029	0.29698	chloroplast	GO:0008152 metabolic process; GO:0044237 cellular metabolic process; GO:0009987 cellular process; GO:0015979 photosynthesis;	GO:0016020 membrane; GO:0009523 photosystem II; GO:0019898 extrinsic component of membrane; GO:0098796 membrane protein complex; GO:0009654 photosystem II oxygen evolving complex; GO:0042651 thylakoid membrane; GO:0032991 macromolecular complex; GO:0044424 intracellular part; GO:0005623 cell; GO:0034357 photosynthetic membrane; GO:0009521 photosystem; GO:1902494 catalytic complex; GO:0044425 memb…	GO:0043169 cation binding; GO:0046872 metal ion binding; GO:0005509 calcium ion binding; GO:0005488 binding; GO:0043167 ion binding;	K02717	psbP; photosystem II oxygen-evolving enhancer protein 2	sly00195 Photosynthesis - Solanum lycopersicum (tomato); sly01100 Metabolic pathways - Solanum lycopersicum (tomato);	IPR016123;	Mog1/PsbP, alpha/beta/alpha sandwich;
A0A1U8EHL9	Uncharacterized protein OS=Capsicum annuum OX=4072 GN=T459_22522	T459_22522	39.578	45.328	16.9	5	10	5	1.009	1.001	1.021	1.041	0.99	0.956	0.985	0.58144	chloroplast			GO:0003824 catalytic activity; GO:0016491 oxidoreductase activity;				IPR000683; IPR016040;	Oxidoreductase, N-terminal; NAD(P)-binding domain;	GQ	KOG2741	Dimeric dihydrodiol dehydrogenase
A0A1U8EHS3	"6,7-dimethyl-8-ribityllumazine synthase OS=Capsicum annuum OX=4072 GN=T459_03445"	T459_03445	24.021	30.043	20.4	3	3	3	0.975	1.081	0.952	0.994	0.962	1.046	0.998	0.9828	chloroplast	GO:0009110 vitamin biosynthetic process; GO:0018130 heterocycle biosynthetic process; GO:0044711 single-organism biosynthetic process; GO:0009231 riboflavin biosynthetic process; GO:0044281 small molecule metabolic process; GO:0044763 single-organism cellular process; GO:0044699 single-organism process; GO:1901360 organic cyclic compound metabolic process; GO:0006807 nitrogen compound metabolic p…	GO:0032991 macromolecular complex; GO:1902494 catalytic complex; GO:1990234 transferase complex; GO:0005623 cell; GO:0044464 cell part; GO:0009349 riboflavin synthase complex;		K00794	ribH; 6,7-dimethyl-8-ribityllumazine synthase [EC:2.5.1.78]	sly01110 Biosynthesis of secondary metabolites - Solanum lycopersicum (tomato); sly01100 Metabolic pathways - Solanum lycopersicum (tomato); sly00740 Riboflavin metabolism - Solanum lycopersicum (tomato);			H	KOG3243	6,7-dimethyl-8-ribityllumazine synthase
A0A1U8EHU6	Uncharacterized protein OS=Capsicum annuum OX=4072 GN=T459_25529	T459_25529	12.323	18.026	20.9	3	6	3	0.984	0.946	1.013	0.975	1.032	1.047	1.038	0.27768	cytoplasm							IPR014347;	Tautomerase/MIF superfamily;	V	KOG1759	Macrophage migration inhibitory factor
A0A1U8EHV7	Uncharacterized protein OS=Capsicum annuum OX=4072 GN=T459_03074	T459_03074	241.54	2.8238	0.6	1	1	1									nucleus			GO:0005488 binding;				IPR016024; IPR008979;	Armadillo-type fold; Galactose-binding domain-like;
A0A1U8EHW1	Fructose-bisphosphate aldolase OS=Capsicum annuum OX=4072 GN=T459_26163	T459_26163	38.409	60.332	38.3	13	27	8	0.968	0.997	0.991	1.023	1.007	1.015	1.03	0.042121	cytoplasm	GO:0006757 ATP generation from ADP; GO:0009116 nucleoside metabolic process; GO:0042278 purine nucleoside metabolic process; GO:0006165 nucleoside diphosphate phosphorylation; GO:0046031 ADP metabolic process; GO:0019362 pyridine nucleotide metabolic process; GO:0006096 glycolytic process; GO:0009167 purine ribonucleoside monophosphate metabolic process; GO:0009117 nucleotide metabolic process; G…		GO:0016829 lyase activity; GO:0004332 fructose-bisphosphate aldolase activity; GO:0016832 aldehyde-lyase activity; GO:0003824 catalytic activity; GO:0016830 carbon-carbon lyase activity;	K01623	ALDO; fructose-bisphosphate aldolase, class I [EC:4.1.2.13]	sly01110 Biosynthesis of secondary metabolites - Solanum lycopersicum (tomato); sly01200 Carbon metabolism - Solanum lycopersicum (tomato); sly00710 Carbon fixation in photosynthetic organisms - Solanum lycopersicum (tomato); sly00051 Fructose and mannose metabolism - Solanum lycopersicum (tomato); sly00010 Glycolysis / Gluconeogenesis - Solanum lycopersicum (tomato); sly01230 Biosynthesis of ami…	IPR013785;	Aldolase-type TIM barrel;	G	KOG1557	Fructose-biphosphate aldolase
A0A1U8EHX5	Cell division protein FtsZ OS=Capsicum annuum OX=4072 GN=T459_22357	T459_22357	50.458	68.984	28.9	10	24	6	0.99	1.028	1.056	0.957	0.973	1.025	0.961	0.22908	chloroplast		GO:0044424 intracellular part; GO:0005623 cell; GO:0044464 cell part; GO:0005622 intracellular; GO:0005737 cytoplasm;	GO:1901265 nucleoside phosphate binding; GO:0001882 nucleoside binding; GO:0043167 ion binding; GO:0016817 hydrolase activity, acting on acid anhydrides; GO:0016787 hydrolase activity; GO:0000166 nucleotide binding; GO:0017111 nucleoside-triphosphatase activity; GO:0097159 organic cyclic compound binding; GO:1901363 heterocyclic compound binding; GO:0032549 ribonucleoside binding; GO:0097367 carb…	K03531			IPR024757; IPR003008; IPR008280; IPR018316;	Cell division protein FtsZ, C-terminal; Tubulin/FtsZ, GTPase domain; Tubulin/FtsZ, C-terminal; Tubulin/FtsZ, 2-layer sandwich domain;
A0A1U8EHY4	Tubulin beta chain OS=Capsicum annuum OX=4072 GN=T459_25303	T459_25303	50.3	192.5	47.4	15	38	2	1.047	1.089	1.07	0.945	0.94	0.923	0.876	0.00059602	nucleus	GO:0007017 microtubule-based process; GO:0009987 cellular process;	GO:0043229 intracellular organelle; GO:0099513 polymeric cytoskeletal fiber; GO:0005874 microtubule; GO:0043232 intracellular non-membrane-bounded organelle; GO:0044430 cytoskeletal part; GO:0044446 intracellular organelle part; GO:0099512 supramolecular fiber; GO:0044424 intracellular part; GO:0005623 cell; GO:0099080 supramolecular complex; GO:0044422 organelle part; GO:0099081 supramolecular p…	GO:1901265 nucleoside phosphate binding; GO:0001882 nucleoside binding; GO:0043167 ion binding; GO:0016817 hydrolase activity, acting on acid anhydrides; GO:0016787 hydrolase activity; GO:0000166 nucleotide binding; GO:0017111 nucleoside-triphosphatase activity; GO:0097159 organic cyclic compound binding; GO:1901363 heterocyclic compound binding; GO:0032549 ribonucleoside binding; GO:0097367 carb…	K07375	TUBB; tubulin beta	sly04145 Phagosome - Solanum lycopersicum (tomato);	IPR003008; IPR023123; IPR008280; IPR018316;	Tubulin/FtsZ, GTPase domain; Tubulin, C-terminal; Tubulin/FtsZ, C-terminal; Tubulin/FtsZ, 2-layer sandwich domain;	Z	KOG1375	Beta tubulin
A0A1U8EI03	Rhodanese-like domain-containing protein 10 OS=Capsicum annuum OX=4072 GN=T459_25501	T459_25501	24.889	2.895	11.2	2	3	2	1.046	1.031	1.074	0.973	0.992	0.975	0.933	0.0067573	chloroplast							IPR001763;	Rhodanese-like domain;
A0A1U8EI47	Uncharacterized protein OS=Capsicum annuum OX=4072 GN=T459_26236	T459_26236	46.92	1.4691	2.4	1	1	1									nucleus							IPR006571; IPR011992;	TLDc domain; EF-hand domain pair;	S	KOG2557	Uncharacterized conserved protein, contains TLDc domain
A0A1U8EI55	Uncharacterized protein OS=Capsicum annuum OX=4072 GN=T459_22417	T459_22417	52.069	10.493	12.5	5	6	2	0.968	0.988	0.975	1.066	0.994	1.021	1.051	0.080003	chloroplast
A0A1U8EI71	Coatomer subunit beta OS=Capsicum annuum OX=4072 GN=T459_26271	T459_26271	105.64	63.376	25.5	19	27	7	1.009	0.985	0.993	0.984	1.009	1.018	1.008	0.556	nucleus	GO:0045184 establishment of protein localization; GO:0006810 transport; GO:0046907 intracellular transport; GO:0070727 cellular macromolecule localization; GO:0051649 establishment of localization in cell; GO:0016192 vesicle-mediated transport; GO:0006886 intracellular protein transport; GO:0071702 organic substance transport; GO:0008104 protein localization; GO:0033036 macromolecule localization…	GO:0016020 membrane; GO:0031410 cytoplasmic vesicle; GO:0031090 organelle membrane; GO:0098796 membrane protein complex; GO:0030137 COPI-coated vesicle; GO:0031982 vesicle; GO:0030660 Golgi-associated vesicle membrane; GO:0005737 cytoplasm; GO:0044433 cytoplasmic vesicle part; GO:0032991 macromolecular complex; GO:0044424 intracellular part; GO:0030120 vesicle coat; GO:0030663 COPI-coated vesicle…	GO:0005198 structural molecule activity; GO:0005488 binding;	K17301			IPR011710; IPR011989; IPR029446; IPR016024; IPR002553;	Coatomer beta subunit, C-terminal; Armadillo-like helical; Coatomer beta subunit, appendage platform domain; Armadillo-type fold; Clathrin/coatomer adaptor, adaptin-like, N-terminal;	U	KOG1058	Vesicle coat complex COPI, beta subunit
A0A1U8EI97	Uncharacterized protein OS=Capsicum annuum OX=4072 GN=T459_28870	T459_28870	40.741	68.663	28.1	10	17	10	1.042	1.019	0.955	0.968	0.953	1.018	0.974	0.47982	cytoplasm	GO:0044699 single-organism process; GO:0008152 metabolic process; GO:0055114 oxidation-reduction process; GO:0044710 single-organism metabolic process;		GO:0046914 transition metal ion binding; GO:0003824 catalytic activity; GO:0005488 binding; GO:0043167 ion binding; GO:0046872 metal ion binding; GO:0043169 cation binding; GO:0008270 zinc ion binding; GO:0016491 oxidoreductase activity;	K00121	frmA; S-(hydroxymethyl)glutathione dehydrogenase / alcohol dehydrogenase [EC:1.1.1.284 1.1.1.1]	sly01110 Biosynthesis of secondary metabolites - Solanum lycopersicum (tomato); sly00350 Tyrosine metabolism - Solanum lycopersicum (tomato); sly01200 Carbon metabolism - Solanum lycopersicum (tomato); sly00010 Glycolysis / Gluconeogenesis - Solanum lycopersicum (tomato); sly01100 Metabolic pathways - Solanum lycopersicum (tomato); sly00071 Fatty acid degradation - Solanum lycopersicum (tomato);	IPR011032; IPR020843; IPR016040; IPR013154; IPR013149;	GroES-like; Polyketide synthase, enoylreductase domain; NAD(P)-binding domain; Alcohol dehydrogenase, N-terminal; Alcohol dehydrogenase, C-terminal;	Q	KOG0022	Alcohol dehydrogenase, class III
A0A1U8EIA7	Uncharacterized protein OS=Capsicum annuum OX=4072 GN=T459_27741	T459_27741	100.04	3.4498	2.8	2	2	2	0.986	0.99	1.048	1.009	0.926	1.054	0.988	0.78178	cytoplasm	GO:0016310 phosphorylation; GO:0044267 cellular protein metabolic process; GO:0044238 primary metabolic process; GO:0044237 cellular metabolic process; GO:0006796 phosphate-containing compound metabolic process; GO:0071704 organic substance metabolic process; GO:0008152 metabolic process; GO:0006468 protein phosphorylation; GO:0006793 phosphorus metabolic process; GO:0044260 cellular macromolecul…		GO:0005524 ATP binding; GO:1901265 nucleoside phosphate binding; GO:0016773 phosphotransferase activity, alcohol group as acceptor; GO:0001882 nucleoside binding; GO:0043167 ion binding; GO:0004672 protein kinase activity; GO:0000166 nucleotide binding; GO:0097159 organic cyclic compound binding; GO:1901363 heterocyclic compound binding; GO:0032549 ribonucleoside binding; GO:0097367 carbohydrate …	K17541			IPR000719; IPR011989; IPR016024; IPR011009;	Protein kinase domain; Armadillo-like helical; Armadillo-type fold; Protein kinase-like domain;	T	KOG2137	Protein kinase
A0A1U8EIA9	Alpha-L-arabinofuranosidase 1 OS=Capsicum annuum OX=4072 GN=T459_26400	T459_26400	73.999	130.9	35.5	22	37	22	1.025	1.019	1.005	0.991	0.99	0.995	0.976	0.0160407	chloroplast	GO:0044723 single-organism carbohydrate metabolic process; GO:0008152 metabolic process; GO:0019566 arabinose metabolic process; GO:0044710 single-organism metabolic process; GO:0044281 small molecule metabolic process; GO:0005996 monosaccharide metabolic process; GO:0044699 single-organism process; GO:0046373 L-arabinose metabolic process; GO:0005975 carbohydrate metabolic process; GO:0044238 pr…		GO:0046556 alpha-L-arabinofuranosidase activity; GO:0004553 hydrolase activity, hydrolyzing O-glycosyl compounds; GO:0016787 hydrolase activity; GO:0003824 catalytic activity; GO:0016798 hydrolase activity, acting on glycosyl bonds;	K01209	abfA; alpha-N-arabinofuranosidase [EC:3.2.1.55]	sly00520 Amino sugar and nucleotide sugar metabolism - Solanum lycopersicum (tomato);	IPR010720; IPR017853; IPR008979;	Alpha-L-arabinofuranosidase, C-terminal; Glycoside hydrolase superfamily; Galactose-binding domain-like;
A0A1U8EIB4	Splicing factor 3B subunit 1 OS=Capsicum annuum OX=4072 GN=T459_26402	T459_26402	141.88	17.984	7	8	9	8	1.046	1.041	0.969	1.024	0.925	1.032	0.975	0.58606	plasma membrane			GO:0005488 binding;	K12828	SF3B1; splicing factor 3B subunit 1	sly03040 Spliceosome - Solanum lycopersicum (tomato);	IPR034085; IPR011989; IPR015016; IPR016024;	TOG domain; Armadillo-like helical; Splicing factor 3B subunit 1; Armadillo-type fold;	A	KOG0213	Splicing factor 3b, subunit 1
A0A1U8EIB5	Uncharacterized protein OS=Capsicum annuum OX=4072 GN=T459_25682	T459_25682	71.014	15.209	47.6	26	111	3	0.983	0.917	0.986	1.021	1.022	1.056	1.074	0.051939	cytoplasm				K03283	HSPA1s; heat shock 70kDa protein 1/2/6/8	sly03040 Spliceosome - Solanum lycopersicum (tomato); sly04144 Endocytosis - Solanum lycopersicum (tomato); sly04141 Protein processing in endoplasmic reticulum - Solanum lycopersicum (tomato);	IPR029048; IPR029047;	Heat shock protein 70kD, C-terminal domain; Heat shock protein 70kD, peptide-binding domain;	O	KOG0101	Molecular chaperones HSP70/HSC70, HSP70 superfamily
A0A1U8EIC9	Uncharacterized protein OS=Capsicum annuum OX=4072 GN=T459_25702	T459_25702	34.438	8.2442	11.6	5	5	5	0.989	1.063	1.023	0.957	0.987	0.973	0.949	0.08194	extracellular
A0A1U8EIE7	Dihydrolipoamide acetyltransferase component of pyruvate dehydrogenase complex OS=Capsicum annuum OX=4072 GN=T459_26871	T459_26871	47.196	66.07	35.9	15	33	13	0.99	0.999	1.027	0.961	1.024	0.968	0.979	0.4031	chloroplast	GO:0008152 metabolic process;		GO:0016746 transferase activity, transferring acyl groups; GO:0003824 catalytic activity; GO:0016740 transferase activity;	K00627	DLAT; pyruvate dehydrogenase E2 component (dihydrolipoamide acetyltransferase) [EC:2.3.1.12]	sly00620 Pyruvate metabolism - Solanum lycopersicum (tomato); sly01110 Biosynthesis of secondary metabolites - Solanum lycopersicum (tomato); sly01200 Carbon metabolism - Solanum lycopersicum (tomato); sly00010 Glycolysis / Gluconeogenesis - Solanum lycopersicum (tomato); sly01100 Metabolic pathways - Solanum lycopersicum (tomato); sly00020 Citrate cycle (TCA cycle) - Solanum lycopersicum (tomato…	IPR004167; IPR001078; IPR011053; IPR000089; IPR023213;	E3-binding domain; 2-oxoacid dehydrogenase acyltransferase, catalytic domain; Single hybrid motif; Biotin/lipoyl attachment; Chloramphenicol acetyltransferase-like domain;	C	KOG0557	Dihydrolipoamide acetyltransferase
A0A1U8EIF5	Uncharacterized protein OS=Capsicum annuum OX=4072 GN=T459_25721	T459_25721	39.289	1.566	3.4	1	1	1	0.933	0.941	1.071	1.063	0.993	1.005	1.039	0.46066	chloroplast		GO:0031224 intrinsic component of membrane; GO:0016020 membrane; GO:0016021 integral component of membrane; GO:0044425 membrane part;
A0A1U8EIN3	"Digalactosyldiacylglycerol synthase 1, chloroplastic OS=Capsicum annuum OX=4072 GN=T459_03380"	T459_03380	85.263	2.1171	3.1	2	2	2									nucleus				K09480	DGD; digalactosyldiacylglycerol synthase [EC:2.4.1.241]	sly00561 Glycerolipid metabolism - Solanum lycopersicum (tomato); sly01100 Metabolic pathways - Solanum lycopersicum (tomato);	IPR001296;	Glycosyl transferase, family 1;
A0A1U8EIS9	Uncharacterized protein OS=Capsicum annuum OX=4072 GN=T459_03460	T459_03460	125.56	94.471	21	22	31	22	0.986	0.991	1.006	1.015	0.989	1.001	1.007	0.4887	chloroplast	GO:0008152 metabolic process; GO:0005975 carbohydrate metabolic process; GO:0044238 primary metabolic process; GO:0071704 organic substance metabolic process;	GO:0032991 macromolecular complex; GO:1902494 catalytic complex; GO:0009341 beta-galactosidase complex;	GO:0015925 galactosidase activity; GO:0003824 catalytic activity; GO:0005488 binding; GO:0016798 hydrolase activity, acting on glycosyl bonds; GO:0030246 carbohydrate binding; GO:0004553 hydrolase activity, hydrolyzing O-glycosyl compounds; GO:0016787 hydrolase activity; GO:0004565 beta-galactosidase activity;	K01190	lacZ; beta-galactosidase [EC:3.2.1.23]	sly00600 Sphingolipid metabolism - Solanum lycopersicum (tomato); sly00511 Other glycan degradation - Solanum lycopersicum (tomato); sly00052 Galactose metabolism - Solanum lycopersicum (tomato); sly01100 Metabolic pathways - Solanum lycopersicum (tomato);	IPR006102; IPR017853; IPR004199; IPR006103; IPR011013; IPR006104; IPR014718; IPR013781; IPR032312; IPR013812; IPR008979;	Glycoside hydrolase, family 2, immunoglobulin-like beta-sandwich; Glycoside hydrolase superfamily; Beta galactosidase small chain/ domain 5; Glycoside hydrolase family 2, catalytic domain; Galactose mutarotase-like domain; Glycosyl hydrolases family 2, sugar binding domain; Glycoside hydrolase-type carbohydrate-binding; Glycoside hydrolase, catalytic domain; Beta-galactosidase, domain 4; Glycosid…	G	KOG2024	Beta-Glucuronidase GUSB (glycosylhydrolase superfamily 2)
A0A1U8EIU9	60S ribosomal protein L9 OS=Capsicum annuum OX=4072 GN=T459_03455	T459_03455	21.977	29.263	58.2	10	23	2	0.905	1.031	1.045	0.984	0.998	1.045	1.015	0.74698	cytoplasm	GO:0006518 peptide metabolic process; GO:0043043 peptide biosynthetic process; GO:0044267 cellular protein metabolic process; GO:0006807 nitrogen compound metabolic process; GO:0009058 biosynthetic process; GO:0043603 cellular amide metabolic process; GO:0044238 primary metabolic process; GO:1901566 organonitrogen compound biosynthetic process; GO:1901576 organic substance biosynthetic process; G…	GO:0005840 ribosome; GO:0043226 organelle; GO:0043229 intracellular organelle; GO:0043232 intracellular non-membrane-bounded organelle; GO:0044464 cell part; GO:0005622 intracellular; GO:0005737 cytoplasm; GO:0032991 macromolecular complex; GO:0044424 intracellular part; GO:1990904 ribonucleoprotein complex; GO:0005623 cell; GO:0030529 intracellular ribonucleoprotein complex; GO:0044444 cytoplasm…	GO:0097159 organic cyclic compound binding; GO:1901363 heterocyclic compound binding; GO:0003723 RNA binding; GO:0005488 binding; GO:0003676 nucleic acid binding; GO:0005198 structural molecule activity; GO:0003735 structural constituent of ribosome; GO:0019843 rRNA binding;	K02940	RP-L9e; large subunit ribosomal protein L9e	sly03010 Ribosome - Solanum lycopersicum (tomato);	IPR020040;	Ribosomal protein L6, alpha-beta domain;	J	KOG3255	60S ribosomal protein L9
A0A1U8EIX3	L-ornithine N5-acetyltransferase NATA1 OS=Capsicum annuum OX=4072 GN=T459_25974	T459_25974	26.356	13.862	21	4	6	4	0.965	1.081	1.004	0.992	0.93	1.043	0.972	0.5801	cytoplasm			GO:0016746 transferase activity, transferring acyl groups; GO:0008080 N-acetyltransferase activity; GO:0003824 catalytic activity; GO:0016740 transferase activity; GO:0016747 transferase activity, transferring acyl groups other than amino-acyl groups; GO:0016407 acetyltransferase activity; GO:0016410 N-acyltransferase activity;	K22883			IPR000182; IPR016181;	GNAT domain; Acyl-CoA N-acyltransferase;	E	KOG3216	Diamine acetyltransferase
A0A1U8EIY2	"Folate synthesis bifunctional protein, mitochondrial OS=Capsicum annuum OX=4072 GN=T459_27129"	T459_27129	56.537	37.834	13.9	6	7	6	1.008	0.987	1.066	0.954	1.033	0.938	0.956	0.28986	chloroplast	GO:0051188 cofactor biosynthetic process; GO:0042559 pteridine-containing compound biosynthetic process; GO:0016053 organic acid biosynthetic process; GO:0006725 cellular aromatic compound metabolic process; GO:0044699 single-organism process; GO:0042398 cellular modified amino acid biosynthetic process; GO:0009058 biosynthetic process; GO:1901566 organonitrogen compound biosynthetic process; GO:…		GO:0003824 catalytic activity; GO:0003848 2-amino-4-hydroxy-6-hydroxymethyldihydropteridine diphosphokinase activity; GO:0016765 transferase activity, transferring alkyl or aryl (other than methyl) groups; GO:0016778 diphosphotransferase activity; GO:0004156 dihydropteroate synthase activity; GO:0016740 transferase activity; GO:0016772 transferase activity, transferring phosphorus-containing grou…	K13941	folKP; 2-amino-4-hydroxy-6-hydroxymethyldihydropteridine diphosphokinase / dihydropteroate synthase [EC:2.7.6.3 2.5.1.15]	sly00790 Folate biosynthesis - Solanum lycopersicum (tomato); sly01100 Metabolic pathways - Solanum lycopersicum (tomato);	IPR011005; IPR000550; IPR000489; IPR006390;	Dihydropteroate synthase-like; 7,8-Dihydro-6-hydroxymethylpterin-pyrophosphokinase, HPPK; Pterin-binding domain; Dihydropteroate synthase;	H	KOG2544	Dihydropteroate synthase/7,8-dihydro-6-hydroxymethylpterin-pyrophosphokinase/Dihydroneopterin aldolase
A0A1U8EJ06	"2-Cys peroxiredoxin BAS1, chloroplastic OS=Capsicum annuum OX=4072 GN=T459_03397"	T459_03397	29.605	139.85	44.8	11	30	6	0.992	1.015	1.014	0.985	0.989	0.978	0.977	0.047617	chloroplast	GO:0050794 regulation of cellular process; GO:0042592 homeostatic process; GO:0065008 regulation of biological quality; GO:0008152 metabolic process; GO:0050789 regulation of biological process; GO:0055114 oxidation-reduction process; GO:0044710 single-organism metabolic process; GO:0045454 cell redox homeostasis; GO:0044763 single-organism cellular process; GO:0019725 cellular homeostasis; GO:00…		GO:0016209 antioxidant activity; GO:0003824 catalytic activity; GO:0051920 peroxiredoxin activity; GO:0016684 oxidoreductase activity, acting on peroxide as acceptor; GO:0016491 oxidoreductase activity;	K03386			IPR019479; IPR000866; IPR012336; IPR013766;	Peroxiredoxin, C-terminal; Alkyl hydroperoxide reductase subunit C/ Thiol specific antioxidant; Thioredoxin-like fold; Thioredoxin domain;	O	KOG0852	Alkyl hydroperoxide reductase, thiol specific antioxidant and related enzymes
A0A1U8EJ16	Uncharacterized protein OS=Capsicum annuum OX=4072 GN=T459_27754	T459_27754	82.099	20.987	6.7	5	6	5	0.938	0.954	0.935	1.095	1.053	1.026	1.123	0.0044024	nucleus			GO:0097159 organic cyclic compound binding; GO:1901363 heterocyclic compound binding; GO:0003723 RNA binding; GO:0005488 binding; GO:0003676 nucleic acid binding;	K13210			IPR004087; IPR004088;	K Homology domain; K Homology domain, type 1;	A	KOG0342	ATP-dependent RNA helicase pitchoune
A0A1U8EJ32	"Serine/threonine-protein kinase STN7, chloroplastic OS=Capsicum annuum OX=4072 GN=T459_28036"	T459_28036	63.039	28.182	20.4	10	13	10	0.961	0.985	0.979	1.074	0.987	0.963	1.034	0.3949	chloroplast	GO:0016310 phosphorylation; GO:0044267 cellular protein metabolic process; GO:0044238 primary metabolic process; GO:0044237 cellular metabolic process; GO:0006796 phosphate-containing compound metabolic process; GO:0071704 organic substance metabolic process; GO:0008152 metabolic process; GO:0006468 protein phosphorylation; GO:0006793 phosphorus metabolic process; GO:0044260 cellular macromolecul…		GO:0005524 ATP binding; GO:1901265 nucleoside phosphate binding; GO:0016773 phosphotransferase activity, alcohol group as acceptor; GO:0001882 nucleoside binding; GO:0043167 ion binding; GO:0004672 protein kinase activity; GO:0000166 nucleotide binding; GO:0097159 organic cyclic compound binding; GO:1901363 heterocyclic compound binding; GO:0032549 ribonucleoside binding; GO:0097367 carbohydrate …				IPR000719; IPR011009;	Protein kinase domain; Protein kinase-like domain;	R	KOG0594	Protein kinase PCTAIRE and related kinases
A0A1U8EJ68	Protein TPLATE OS=Capsicum annuum OX=4072 GN=T459_28540	T459_28540	129.18	13.492	5.5	6	6	6	0.972	0.983	0.961	1.035	1.023	1.017	1.055	0.0030975	chloroplast			GO:0005488 binding;				IPR011989; IPR016024;	Armadillo-like helical; Armadillo-type fold;
A0A1U8EJ83	Indole-3-acetaldehyde oxidase OS=Capsicum annuum OX=4072 GN=T459_28426	T459_28426	152.2	16.214	11.7	16	22	6	0.975	1.021	1.022	1.012	0.957	1.005	0.985	0.56358	chloroplast	GO:0044699 single-organism process; GO:0008152 metabolic process; GO:0055114 oxidation-reduction process; GO:0044710 single-organism metabolic process;		GO:0051537 2 iron, 2 sulfur cluster binding; GO:1901265 nucleoside phosphate binding; GO:0005506 iron ion binding; GO:0050660 flavin adenine dinucleotide binding; GO:0043167 ion binding; GO:0000166 nucleotide binding; GO:0048037 cofactor binding; GO:0016491 oxidoreductase activity; GO:0016614 oxidoreductase activity, acting on CH-OH group of donors; GO:0009055 electron carrier activity; GO:190136…	K09842	AAO3; abscisic-aldehyde oxidase [EC:1.2.3.14]	sly01110 Biosynthesis of secondary metabolites - Solanum lycopersicum (tomato); sly00906 Carotenoid biosynthesis - Solanum lycopersicum (tomato); sly01100 Metabolic pathways - Solanum lycopersicum (tomato);	IPR001041; IPR002346; IPR012675; IPR002888; IPR016166; IPR005107; IPR016169; IPR000674; IPR008274;	2Fe-2S ferredoxin-type iron-sulfur binding domain; Molybdopterin dehydrogenase, FAD-binding; Beta-grasp domain; [2Fe-2S]-binding; FAD-binding, type 2; CO dehydrogenase flavoprotein, C-terminal; CO dehydrogenase flavoprotein-like, FAD-binding, subdomain 2; Aldehyde oxidase/xanthine dehydrogenase, a/b hammerhead; Aldehyde oxidase/xanthine dehydrogenase, molybdopterin binding;	F	KOG0430	Xanthine dehydrogenase
A0A1U8EJ84	IAA-amino acid hydrolase ILR1-like 4 OS=Capsicum annuum OX=4072 GN=T459_03415	T459_03415	47.349	4.8144	6	2	2	2									chloroplast	GO:0008152 metabolic process;		GO:0016787 hydrolase activity; GO:0003824 catalytic activity;	K14664			IPR011650;	Peptidase M20, dimerisation domain;
A0A1U8EJ96	Uncharacterized protein OS=Capsicum annuum OX=4072 GN=T459_03068	T459_03068	37.325	2.7404	3.3	1	1	1									cytoplasm
A0A1U8EJC8	Uncharacterized protein OS=Capsicum annuum OX=4072 GN=T459_26862	T459_26862	102.45	2.3112	6	7	8	2									nucleus			GO:1901265 nucleoside phosphate binding; GO:0001882 nucleoside binding; GO:0043167 ion binding; GO:0000166 nucleotide binding; GO:0097159 organic cyclic compound binding; GO:1901363 heterocyclic compound binding; GO:0032549 ribonucleoside binding; GO:0097367 carbohydrate derivative binding; GO:0032553 ribonucleotide binding; GO:0005488 binding; GO:0032550 purine ribonucleoside binding; GO:0043531…				IPR002182; IPR027417; IPR032675;	NB-ARC; P-loop containing nucleoside triphosphate hydrolase; Leucine-rich repeat domain, L domain-like;	T	KOG4658	Apoptotic ATPase
A0A1U8EJF5	"4-hydroxy-3-methylbut-2-en-1-yl diphosphate synthase (Ferredoxin), chloroplastic OS=Capsicum annuum OX=4072 GN=T459_28778"	T459_28778	81.914	236.86	44.3	27	52	26	1.069	1.084	1.059	0.939	0.942	0.914	0.87	0.00028465	chloroplast	GO:0006720 isoprenoid metabolic process; GO:0044711 single-organism biosynthetic process; GO:0055114 oxidation-reduction process; GO:0044763 single-organism cellular process; GO:0044699 single-organism process; GO:0009058 biosynthetic process; GO:0044255 cellular lipid metabolic process; GO:0044238 primary metabolic process; GO:1901576 organic substance biosynthetic process; GO:0044237 cellular m…		GO:0016725 oxidoreductase activity, acting on CH or CH2 groups; GO:0052592 oxidoreductase activity, acting on CH or CH2 groups, with an iron-sulfur protein as acceptor; GO:0005506 iron ion binding; GO:0046914 transition metal ion binding; GO:0003824 catalytic activity; GO:0005488 binding; GO:0043167 ion binding; GO:0046872 metal ion binding; GO:0043169 cation binding; GO:0046429 4-hydroxy-3-methy…	K03526	gcpE; (E)-4-hydroxy-3-methylbut-2-enyl-diphosphate synthase [EC:1.17.7.1 1.17.7.3]	sly01110 Biosynthesis of secondary metabolites - Solanum lycopersicum (tomato); sly00900 Terpenoid backbone biosynthesis - Solanum lycopersicum (tomato); sly01100 Metabolic pathways - Solanum lycopersicum (tomato);	IPR013785;	Aldolase-type TIM barrel;
A0A1U8EJF7	Calcium-transporting ATPase OS=Capsicum annuum OX=4072 GN=T459_26322	T459_26322	109.56	1.6305	1.2	1	1	1									plasma membrane	GO:0006810 transport; GO:0072511 divalent inorganic cation transport; GO:0006816 calcium ion transport; GO:0006812 cation transport; GO:0006811 ion transport; GO:0030001 metal ion transport; GO:0051179 localization; GO:0051234 establishment of localization; GO:0070838 divalent metal ion transport;	GO:0031224 intrinsic component of membrane; GO:0016020 membrane; GO:0016021 integral component of membrane; GO:0044425 membrane part;	GO:0042625 ATPase coupled ion transmembrane transporter activity; GO:1901265 nucleoside phosphate binding; GO:0015399 primary active transmembrane transporter activity; GO:0022892 substrate-specific transporter activity; GO:0016817 hydrolase activity, acting on acid anhydrides; GO:0016787 hydrolase activity; GO:0022891 substrate-specific transmembrane transporter activity; GO:0016887 ATPase activ…	K05853			IPR004014; IPR023298; IPR008250; IPR023299; IPR006068; IPR023214;	Cation-transporting P-type ATPase, N-terminal; P-type ATPase, transmembrane domain; P-type ATPase, A domain; P-type ATPase, cytoplasmic domain N; Cation-transporting P-type ATPase, C-terminal; HAD-like domain;	P	KOG0202	Ca2+ transporting ATPase
A0A1U8EJG9	Uncharacterized protein OS=Capsicum annuum OX=4072 GN=T459_03429	T459_03429	66.063	38.219	26.1	12	14	12	0.995	1.055	1.045	0.987	0.947	0.97	0.938	0.043216	chloroplast							IPR016040; IPR013857; IPR008979;	NAD(P)-binding domain; NADH:ubiquinone oxidoreductase intermediate-associated protein 30; Galactose-binding domain-like;	G	KOG1203	Predicted dehydrogenase
A0A1U8EJJ3	Uncharacterized protein OS=Capsicum annuum OX=4072 GN=T459_26872	T459_26872	97.563	1.6079	1.3	1	1	1									plasma membrane							IPR007484;	Peptidase M28;	OR	KOG2194	Aminopeptidases of the M20 family
A0A1U8EJS9	"2-Cys peroxiredoxin BAS1, chloroplastic OS=Capsicum annuum OX=4072 GN=T459_26258"	T459_26258	29.038	113.99	49.8	11	44	6	1.002	0.988	1.003	0.974	1.017	0.965	0.988	0.49454	chloroplast	GO:0050794 regulation of cellular process; GO:0042592 homeostatic process; GO:0065008 regulation of biological quality; GO:0008152 metabolic process; GO:0050789 regulation of biological process; GO:0055114 oxidation-reduction process; GO:0044710 single-organism metabolic process; GO:0045454 cell redox homeostasis; GO:0044763 single-organism cellular process; GO:0019725 cellular homeostasis; GO:00…		GO:0016209 antioxidant activity; GO:0003824 catalytic activity; GO:0051920 peroxiredoxin activity; GO:0016684 oxidoreductase activity, acting on peroxide as acceptor; GO:0016491 oxidoreductase activity;	K03386			IPR019479; IPR000866; IPR012336; IPR013766;	Peroxiredoxin, C-terminal; Alkyl hydroperoxide reductase subunit C/ Thiol specific antioxidant; Thioredoxin-like fold; Thioredoxin domain;	O	KOG0852	Alkyl hydroperoxide reductase, thiol specific antioxidant and related enzymes
A0A1U8EJT2	3-hydroxyisobutyryl-CoA hydrolase 1 OS=Capsicum annuum OX=4072 GN=T459_03137	T459_03137	45.038	54.881	28.3	10	12	10	0.951	0.948	0.914	1.058	0.997	1.059	1.107	0.0128002	chloroplast			GO:0016787 hydrolase activity; GO:0016289 CoA hydrolase activity; GO:0016790 thiolester hydrolase activity; GO:0003824 catalytic activity; GO:0003860 3-hydroxyisobutyryl-CoA hydrolase activity; GO:0016788 hydrolase activity, acting on ester bonds;	K05605	HIBCH; 3-hydroxyisobutyryl-CoA hydrolase [EC:3.1.2.4]	sly00410 beta-Alanine metabolism - Solanum lycopersicum (tomato); sly00640 Propanoate metabolism - Solanum lycopersicum (tomato); sly01200 Carbon metabolism - Solanum lycopersicum (tomato); sly00280 Valine, leucine and isoleucine degradation - Solanum lycopersicum (tomato); sly01100 Metabolic pathways - Solanum lycopersicum (tomato);	IPR029045;	ClpP/crotonase-like domain;	I	KOG1684	Enoyl-CoA hydratase
A0A1U8EJY6	Tubulin beta chain OS=Capsicum annuum OX=4072 GN=T459_26416	T459_26416	50.294	8.2498	28.4	10	25	2	1.106	1.052	1.125	0.914	0.873	0.948	0.833	0.0042399	nucleus	GO:0007017 microtubule-based process; GO:0009987 cellular process;	GO:0043229 intracellular organelle; GO:0099513 polymeric cytoskeletal fiber; GO:0005874 microtubule; GO:0043232 intracellular non-membrane-bounded organelle; GO:0044430 cytoskeletal part; GO:0044446 intracellular organelle part; GO:0099512 supramolecular fiber; GO:0044424 intracellular part; GO:0005623 cell; GO:0099080 supramolecular complex; GO:0044422 organelle part; GO:0099081 supramolecular p…	GO:1901265 nucleoside phosphate binding; GO:0001882 nucleoside binding; GO:0043167 ion binding; GO:0016817 hydrolase activity, acting on acid anhydrides; GO:0016787 hydrolase activity; GO:0000166 nucleotide binding; GO:0017111 nucleoside-triphosphatase activity; GO:0097159 organic cyclic compound binding; GO:1901363 heterocyclic compound binding; GO:0032549 ribonucleoside binding; GO:0097367 carb…	K07375	TUBB; tubulin beta	sly04145 Phagosome - Solanum lycopersicum (tomato);	IPR003008; IPR023123; IPR008280; IPR018316;	Tubulin/FtsZ, GTPase domain; Tubulin, C-terminal; Tubulin/FtsZ, C-terminal; Tubulin/FtsZ, 2-layer sandwich domain;	Z	KOG1375	Beta tubulin
A0A1U8EK03	Dihydropyrimidinase OS=Capsicum annuum OX=4072 GN=T459_28030	T459_28030	58.046	1.4114	3	2	2	2									extracellular		GO:0044424 intracellular part; GO:0005623 cell; GO:0044464 cell part; GO:0005622 intracellular; GO:0005737 cytoplasm;	GO:0016787 hydrolase activity; GO:0003824 catalytic activity; GO:0016810 hydrolase activity, acting on carbon-nitrogen (but not peptide) bonds;	K01464	DPYS; dihydropyrimidinase [EC:3.5.2.2]	sly00410 beta-Alanine metabolism - Solanum lycopersicum (tomato); sly00770 Pantothenate and CoA biosynthesis - Solanum lycopersicum (tomato); sly01100 Metabolic pathways - Solanum lycopersicum (tomato); sly00240 Pyrimidine metabolism - Solanum lycopersicum (tomato);	IPR032466; IPR006680; IPR011059;	Metal-dependent hydrolase; Amidohydrolase-related; Metal-dependent hydrolase, composite domain;	F	KOG2584	Dihydroorotase and related enzymes
A0A1U8EK16	Dynamin-related protein 1E OS=Capsicum annuum OX=4072 GN=T459_03162	T459_03162	68.754	43.265	20.5	10	10	7	0.912	0.963	0.869	1.101	1.065	1.096	1.189	0.0052412	cytoplasm			GO:1901265 nucleoside phosphate binding; GO:0001882 nucleoside binding; GO:0043167 ion binding; GO:0016817 hydrolase activity, acting on acid anhydrides; GO:0016787 hydrolase activity; GO:0000166 nucleotide binding; GO:0017111 nucleoside-triphosphatase activity; GO:0097159 organic cyclic compound binding; GO:1901363 heterocyclic compound binding; GO:0032549 ribonucleoside binding; GO:0097367 carb…				IPR030381; IPR003130; IPR001401; IPR027417; IPR020850; IPR000375;	Dynamin-type guanine nucleotide-binding (G) domain; Dynamin GTPase effector; Dynamin, GTPase domain; P-loop containing nucleoside triphosphate hydrolase; GTPase effector domain; Dynamin central domain;	UR	KOG0446	Vacuolar sorting protein VPS1, dynamin, and related proteins
A0A1U8EK55	Uncharacterized protein OS=Capsicum annuum OX=4072 GN=T459_03441	T459_03441	35.836	42.887	27.7	8	11	8	0.925	0.913	0.956	1.076	1.053	1.078	1.148	0.00090397	cytoplasm	GO:0009414 response to water deprivation; GO:0001101 response to acid chemical; GO:0042221 response to chemical; GO:0006950 response to stress; GO:0009415 response to water; GO:0009628 response to abiotic stimulus; GO:1901700 response to oxygen-containing compound; GO:0010035 response to inorganic substance; GO:0050896 response to stimulus; GO:0009269 response to desiccation;						IPR013783; IPR013990; IPR004864;	Immunoglobulin-like fold; Water stress and hypersensitive response domain; Late embryogenesis abundant protein, LEA-14;
A0A1U8EKC1	Uncharacterized protein OS=Capsicum annuum OX=4072 GN=T459_26857	T459_26857	101.57	28.72	13.1	11	14	9	0.982	1.017	0.981	1.045	0.957	0.959	0.994	0.83164	chloroplast			GO:1901265 nucleoside phosphate binding; GO:0001882 nucleoside binding; GO:0043167 ion binding; GO:0000166 nucleotide binding; GO:0097159 organic cyclic compound binding; GO:1901363 heterocyclic compound binding; GO:0032549 ribonucleoside binding; GO:0097367 carbohydrate derivative binding; GO:0032553 ribonucleotide binding; GO:0005488 binding; GO:0032550 purine ribonucleoside binding; GO:0043531…				IPR003593; IPR002182; IPR027417; IPR032675;	AAA+ ATPase domain; NB-ARC; P-loop containing nucleoside triphosphate hydrolase; Leucine-rich repeat domain, L domain-like;
A0A1U8EKC4	Uncharacterized protein OS=Capsicum annuum OX=4072 GN=T459_28663	T459_28663	96.792	3.1767	2.5	2	3	2	1.014	0.953	1.076	0.953	0.982	1.028	0.974	0.56542	nucleus	GO:0006396 RNA processing; GO:0006725 cellular aromatic compound metabolic process; GO:1901360 organic cyclic compound metabolic process; GO:0006807 nitrogen compound metabolic process; GO:0044238 primary metabolic process; GO:0044237 cellular metabolic process; GO:0071704 organic substance metabolic process; GO:0016070 RNA metabolic process; GO:0008152 metabolic process; GO:0090304 nucleic acid …		GO:0097159 organic cyclic compound binding; GO:1901363 heterocyclic compound binding; GO:0003723 RNA binding; GO:1901265 nucleoside phosphate binding; GO:0005488 binding; GO:0003676 nucleic acid binding; GO:0000166 nucleotide binding; GO:0036094 small molecule binding;	K12842	SR140; U2-associated protein SR140	sly03040 Spliceosome - Solanum lycopersicum (tomato);	IPR000061; IPR006569; IPR000504; IPR012677; IPR013170; IPR008942;	SWAP/Surp; CID domain; RNA recognition motif domain; Nucleotide-binding alpha-beta plait domain; mRNA splicing factor Cwf21 domain; ENTH/VHS;	R	KOG0151	Predicted splicing regulator, contains RRM, SWAP and RPR domains
A0A1U8EKL9	"Alpha-1,4-glucan-protein synthase [UDP-forming] 2 OS=Capsicum annuum OX=4072 GN=T459_27131"	T459_27131	41.413	81.86	48.9	17	28	7	1.019	0.973	1.014	1.002	1.049	0.962	1.002	0.95052	cytoplasm	GO:0016051 carbohydrate biosynthetic process; GO:0044711 single-organism biosynthetic process; GO:0006073 cellular glucan metabolic process; GO:0000271 polysaccharide biosynthetic process; GO:0030243 cellulose metabolic process; GO:0044042 glucan metabolic process; GO:0044763 single-organism cellular process; GO:0044699 single-organism process; GO:0033692 cellular polysaccharide biosynthetic proc…		GO:0016853 isomerase activity; GO:0016866 intramolecular transferase activity; GO:0003824 catalytic activity;	K13379	RGP; reversibly glycosylated polypeptide / UDP-arabinopyranose mutase [EC:2.4.1.- 5.4.99.30]	sly00520 Amino sugar and nucleotide sugar metabolism - Solanum lycopersicum (tomato);	IPR029044;	Nucleotide-diphospho-sugar transferases;
A0A1U8EKQ9	Uncharacterized protein OS=Capsicum annuum OX=4072 GN=T459_11861	T459_11861	21.686	4.9468	12.6	2	2	2	0.977	1.066	1.217	0.82	1.008	0.921	0.843	0.123904	cytoplasm			GO:0043169 cation binding; GO:0046872 metal ion binding; GO:0005515 protein binding; GO:0008270 zinc ion binding; GO:0046914 transition metal ion binding; GO:0005488 binding; GO:0043167 ion binding;	K15707			IPR001841; IPR013083;	Zinc finger, RING-type; Zinc finger, RING/FYVE/PHD-type;	S	KOG4604	Uncharacterized conserved protein
A0A1U8EKR1	40S ribosomal protein S5 OS=Capsicum annuum OX=4072 GN=T459_32758	T459_32758	23.513	23.733	37.3	9	21	9	1.018	1.001	1.005	1.013	1.006	0.999	0.998	0.77548	cytoskeleton	GO:0006518 peptide metabolic process; GO:0043043 peptide biosynthetic process; GO:0044267 cellular protein metabolic process; GO:0006807 nitrogen compound metabolic process; GO:0009058 biosynthetic process; GO:0043603 cellular amide metabolic process; GO:0044238 primary metabolic process; GO:1901566 organonitrogen compound biosynthetic process; GO:1901576 organic substance biosynthetic process; G…	GO:0043229 intracellular organelle; GO:0005840 ribosome; GO:0043232 intracellular non-membrane-bounded organelle; GO:0015935 small ribosomal subunit; GO:0005737 cytoplasm; GO:0044446 intracellular organelle part; GO:0032991 macromolecular complex; GO:0044424 intracellular part; GO:0005623 cell; GO:0044422 organelle part; GO:0043228 non-membrane-bounded organelle; GO:0043226 organelle; GO:0044464 …	GO:0097159 organic cyclic compound binding; GO:1901363 heterocyclic compound binding; GO:0003723 RNA binding; GO:0005488 binding; GO:0003676 nucleic acid binding; GO:0005198 structural molecule activity; GO:0003735 structural constituent of ribosome;	K02989	RP-S5e; small subunit ribosomal protein S5e	sly03010 Ribosome - Solanum lycopersicum (tomato);	IPR023798;	Ribosomal protein S7 domain;	J	KOG3291	Ribosomal protein S7
A0A1U8EKT2	Nucleoside diphosphate kinase OS=Capsicum annuum OX=4072 GN=T459_03238	T459_03238	16.296	53.166	52	7	13	7	1.007	0.996	1.051	0.99	0.966	1.013	0.972	0.25834	cytoplasm	GO:0042278 purine nucleoside metabolic process; GO:0009116 nucleoside metabolic process; GO:0046132 pyrimidine ribonucleoside biosynthetic process; GO:0006165 nucleoside diphosphate phosphorylation; GO:0009147 pyrimidine nucleoside triphosphate metabolic process; GO:0009117 nucleotide metabolic process; GO:0044699 single-organism process; GO:0046129 purine ribonucleoside biosynthetic process; GO:…		GO:0016301 kinase activity; GO:0003824 catalytic activity; GO:0004550 nucleoside diphosphate kinase activity; GO:0019205 nucleobase-containing compound kinase activity; GO:0016740 transferase activity; GO:0016776 phosphotransferase activity, phosphate group as acceptor; GO:0016772 transferase activity, transferring phosphorus-containing groups;	K00940	ndk; nucleoside-diphosphate kinase [EC:2.7.4.6]	sly01110 Biosynthesis of secondary metabolites - Solanum lycopersicum (tomato); sly00230 Purine metabolism - Solanum lycopersicum (tomato); sly04016 MAPK signaling pathway - plant - Solanum lycopersicum (tomato); sly01100 Metabolic pathways - Solanum lycopersicum (tomato); sly00240 Pyrimidine metabolism - Solanum lycopersicum (tomato);			F	KOG0888	Nucleoside diphosphate kinase
A0A1U8EKT3	Uncharacterized protein OS=Capsicum annuum OX=4072 GN=T459_19190	T459_19190	80.271	-2	1.6	1	1	1	0.966	0.931	0.961	0.979	1.118	1.038	1.097	0.085462	Golgi apparatus									T	KOG0192	Tyrosine kinase specific for activated (GTP-bound) p21cdc42Hs
A0A1U8EKU8	Nucleolar GTP-binding protein 1 OS=Capsicum annuum OX=4072 GN=T459_03121	T459_03121	77.795	1.2912	1.2	1	1	1									cytoplasm		GO:0043229 intracellular organelle; GO:0043232 intracellular non-membrane-bounded organelle; GO:0044446 intracellular organelle part; GO:0031981 nuclear lumen; GO:0044424 intracellular part; GO:0005730 nucleolus; GO:0005623 cell; GO:0044422 organelle part; GO:0043228 non-membrane-bounded organelle; GO:0043226 organelle; GO:0043231 intracellular membrane-bounded organelle; GO:0031974 membrane-encl…	GO:1901265 nucleoside phosphate binding; GO:0001882 nucleoside binding; GO:0043167 ion binding; GO:0000166 nucleotide binding; GO:0097159 organic cyclic compound binding; GO:1901363 heterocyclic compound binding; GO:0032549 ribonucleoside binding; GO:0097367 carbohydrate derivative binding; GO:0032553 ribonucleotide binding; GO:0005488 binding; GO:0032550 purine ribonucleoside binding; GO:0043168…	K06943	NOG1; nucleolar GTP-binding protein	sly03008 Ribosome biogenesis in eukaryotes - Solanum lycopersicum (tomato);	IPR006073; IPR031167; IPR027417; IPR010674; IPR012973;	GTP binding domain; OBG-type guanine nucleotide-binding (G) domain; P-loop containing nucleoside triphosphate hydrolase; Nucleolar GTP-binding protein 1, Rossman-fold domain; NOG, C-terminal;	R	KOG1490	GTP-binding protein CRFG/NOG1 (ODN superfamily)
A0A1U8EKW3	Cyclin-T1-4 OS=Capsicum annuum OX=4072 GN=T459_32678	T459_32678	69.363	1.6608	3.9	2	2	2									nucleus				K15188			IPR013763; IPR006671;	Cyclin-like; Cyclin, N-terminal;	D	KOG0834	CDK9 kinase-activating protein cyclin T
A0A1U8EL12	Elongation factor 1-alpha OS=Capsicum annuum OX=4072 GN=T459_28668	T459_28668	49.23	136.93	41.6	20	74	4	1.012	1.008	1.043	0.987	1	0.972	0.966	0.063559	cytoplasm	GO:0006518 peptide metabolic process; GO:0006414 translational elongation; GO:0043043 peptide biosynthetic process; GO:0044267 cellular protein metabolic process; GO:0006807 nitrogen compound metabolic process; GO:0009058 biosynthetic process; GO:0043603 cellular amide metabolic process; GO:0044238 primary metabolic process; GO:1901566 organonitrogen compound biosynthetic process; GO:1901576 orga…	GO:0044424 intracellular part; GO:0005623 cell; GO:0044464 cell part; GO:0005622 intracellular; GO:0005737 cytoplasm;	GO:0003723 RNA binding; GO:1901265 nucleoside phosphate binding; GO:0003746 translation elongation factor activity; GO:0001882 nucleoside binding; GO:0043167 ion binding; GO:0016817 hydrolase activity, acting on acid anhydrides; GO:0016787 hydrolase activity; GO:0000166 nucleotide binding; GO:0017111 nucleoside-triphosphatase activity; GO:1901363 heterocyclic compound binding; GO:0097159 organic …	K03231	EEF1A; elongation factor 1-alpha	sly03013 RNA transport - Solanum lycopersicum (tomato);	IPR004160; IPR004161; IPR009001; IPR027417; IPR000795; IPR009000;	Translation elongation factor EFTu/EF1A, C-terminal; Translation elongation factor EFTu-like, domain 2; Translation elongation factor EF1A/initiation factor IF2gamma, C-terminal; P-loop containing nucleoside triphosphate hydrolase; Transcription factor, GTP-binding domain; Translation protein, beta-barrel domain;	J	KOG0052	Translation elongation factor EF-1 alpha/Tu
A0A1U8EL26	"Sec-independent protein translocase protein TATC, chloroplastic OS=Capsicum annuum OX=4072 GN=T459_26746"	T459_26746	37.648	21.66	8.6	1	1	1	0.951	1.002	1.007	1.056	1.036	0.952	1.028	0.49852	chloroplast		GO:0031224 intrinsic component of membrane; GO:0016020 membrane; GO:0016021 integral component of membrane; GO:0044425 membrane part;		K03118	tatC; sec-independent protein translocase protein TatC	sly03060 Protein export - Solanum lycopersicum (tomato);
A0A1U8EL35	Uridine 5'-monophosphate synthase OS=Capsicum annuum OX=4072 GN=T459_28572	T459_28572	51.51	44.862	21.8	10	12	10	1.046	0.947	0.997	1.069	0.984	1.06	1.041	0.35768	plasma membrane	GO:0009116 nucleoside metabolic process; GO:0046132 pyrimidine ribonucleoside biosynthetic process; GO:0009130 pyrimidine nucleoside monophosphate biosynthetic process; GO:0009117 nucleotide metabolic process; GO:0044699 single-organism process; GO:0009163 nucleoside biosynthetic process; GO:0009058 biosynthetic process; GO:0009156 ribonucleoside monophosphate biosynthetic process; GO:0044237 cel…		GO:0016763 transferase activity, transferring pentosyl groups; GO:0004590 orotidine-5'-phosphate decarboxylase activity; GO:0003824 catalytic activity; GO:0016830 carbon-carbon lyase activity; GO:0016831 carboxy-lyase activity; GO:0016829 lyase activity; GO:0016757 transferase activity, transferring glycosyl groups; GO:0016740 transferase activity; GO:0004588 orotate phosphoribosyltransferase act…	K13421	UMPS; uridine monophosphate synthetase [EC:2.4.2.10 4.1.1.23]	sly01100 Metabolic pathways - Solanum lycopersicum (tomato); sly00240 Pyrimidine metabolism - Solanum lycopersicum (tomato);	IPR013785; IPR000836; IPR004467; IPR001754; IPR011060; IPR029057;	Aldolase-type TIM barrel; Phosphoribosyltransferase domain; Orotate phosphoribosyl transferase domain; Orotidine 5'-phosphate decarboxylase domain; Ribulose-phosphate binding barrel; Phosphoribosyltransferase-like;	F	KOG1377	Uridine 5'- monophosphate synthase/orotate phosphoribosyltransferase
A0A1U8EL92	2-methylene-furan-3-one reductase OS=Capsicum annuum OX=4072 GN=T459_27676	T459_27676	41.185	187.33	46.6	16	47	16	1.001	0.965	1.002	0.98	1.021	0.968	1	0.99156	chloroplast	GO:0044699 single-organism process; GO:0008152 metabolic process; GO:0055114 oxidation-reduction process; GO:0044710 single-organism metabolic process;		GO:0046914 transition metal ion binding; GO:0003824 catalytic activity; GO:0005488 binding; GO:0043167 ion binding; GO:0046872 metal ion binding; GO:0043169 cation binding; GO:0008270 zinc ion binding; GO:0016491 oxidoreductase activity;	K18980			IPR011032; IPR020843; IPR016040; IPR013154;	GroES-like; Polyketide synthase, enoylreductase domain; NAD(P)-binding domain; Alcohol dehydrogenase, N-terminal;	CR	KOG1198	Zinc-binding oxidoreductase
A0A1U8EL96	Pantothenate kinase 1 OS=Capsicum annuum OX=4072 GN=T459_27663	T459_27663	47.15	1.3709	3.3	1	1	1	0.856	1.007	0.892	1.037	1.178	1.022	1.175	0.07182	nucleus	GO:0051188 cofactor biosynthetic process; GO:0009116 nucleoside metabolic process; GO:0042278 purine nucleoside metabolic process; GO:0009117 nucleotide metabolic process; GO:0044699 single-organism process; GO:0046129 purine ribonucleoside biosynthetic process; GO:0009163 nucleoside biosynthetic process; GO:0009058 biosynthetic process; GO:0044237 cellular metabolic process; GO:0006796 phosphate…		GO:0005524 ATP binding; GO:1901265 nucleoside phosphate binding; GO:0016773 phosphotransferase activity, alcohol group as acceptor; GO:0001882 nucleoside binding; GO:0043167 ion binding; GO:0000166 nucleotide binding; GO:0004594 pantothenate kinase activity; GO:0097159 organic cyclic compound binding; GO:1901363 heterocyclic compound binding; GO:0032549 ribonucleoside binding; GO:0097367 carbohyd…	K09680	coaW; type II pantothenate kinase [EC:2.7.1.33]	sly00770 Pantothenate and CoA biosynthesis - Solanum lycopersicum (tomato); sly01100 Metabolic pathways - Solanum lycopersicum (tomato);			H	KOG2201	Pantothenate kinase PanK and related proteins
A0A1U8ELA2	"Fructokinase-like 2, chloroplastic OS=Capsicum annuum OX=4072 GN=T459_27128"	T459_27128	72.927	14.054	15.1	8	11	8	1.086	0.976	1.039	1	0.915	0.931	0.918	0.106404	chloroplast							IPR011611; IPR029056;	Carbohydrate kinase PfkB; Ribokinase-like;	G	KOG2855	Ribokinase
A0A1U8ELB2	ATP-binding cassette sub-family F member 2 OS=Capsicum annuum OX=4072 GN=T459_28671	T459_28671	67.024	9.6341	5.2	2	2	2	1.004	1.031	0.993	1.029	0.962	0.99	0.984	0.51816	cytoplasm			GO:0005524 ATP binding; GO:1901265 nucleoside phosphate binding; GO:0001882 nucleoside binding; GO:0043167 ion binding; GO:0016817 hydrolase activity, acting on acid anhydrides; GO:0016787 hydrolase activity; GO:0000166 nucleotide binding; GO:0017111 nucleoside-triphosphatase activity; GO:0016887 ATPase activity; GO:0097159 organic cyclic compound binding; GO:1901363 heterocyclic compound binding…	K06185			IPR032781; IPR003593; IPR003439; IPR027417;	ABC-transporter extension domain; AAA+ ATPase domain; ABC transporter-like; P-loop containing nucleoside triphosphate hydrolase;	R	KOG0927	Predicted transporter (ABC superfamily)
A0A1U8ELB3	Uric acid degradation bifunctional protein TTL OS=Capsicum annuum OX=4072 GN=T459_03136	T459_03136	37.211	6.2877	12.8	4	6	4	0.958	1.037	0.935	0.986	1.047	1.04	1.049	0.25734	nucleus	GO:0006725 cellular aromatic compound metabolic process; GO:0044281 small molecule metabolic process; GO:0044763 single-organism cellular process; GO:0072521 purine-containing compound metabolic process; GO:0044699 single-organism process; GO:1901360 organic cyclic compound metabolic process; GO:0006807 nitrogen compound metabolic process; GO:0006144 purine nucleobase metabolic process; GO:004423…		GO:0016812 hydrolase activity, acting on carbon-nitrogen (but not peptide) bonds, in cyclic amides; GO:0016787 hydrolase activity; GO:0033971 hydroxyisourate hydrolase activity; GO:0003824 catalytic activity; GO:0016810 hydrolase activity, acting on carbon-nitrogen (but not peptide) bonds;	K13484	TTHL; 5-hydroxyisourate hydrolase / 2-oxo-4-hydroxy-4-carboxy-5-ureidoimidazoline decarboxylase [EC:3.5.2.17 4.1.1.97]	sly00230 Purine metabolism - Solanum lycopersicum (tomato); sly01100 Metabolic pathways - Solanum lycopersicum (tomato);	IPR023416; IPR018020;	Transthyretin/hydroxyisourate hydrolase, superfamily; Oxo-4-hydroxy-4-carboxy-5-ureidoimidazoline decarboxylase;	I	KOG3006	Transthyretin and related proteins
A0A1U8ELC6	Elongation factor 1-alpha OS=Capsicum annuum OX=4072 GN=T459_28941	T459_28941	49.351	18.042	38.8	18	53	2	0.739	0.746	0.628	1.225	1.368	1.26	1.823	0.00075547	cytoplasm	GO:0006518 peptide metabolic process; GO:0006414 translational elongation; GO:0043043 peptide biosynthetic process; GO:0044267 cellular protein metabolic process; GO:0006807 nitrogen compound metabolic process; GO:0009058 biosynthetic process; GO:0043603 cellular amide metabolic process; GO:0044238 primary metabolic process; GO:1901566 organonitrogen compound biosynthetic process; GO:1901576 orga…	GO:0044424 intracellular part; GO:0005623 cell; GO:0044464 cell part; GO:0005622 intracellular; GO:0005737 cytoplasm;	GO:0003723 RNA binding; GO:1901265 nucleoside phosphate binding; GO:0003746 translation elongation factor activity; GO:0001882 nucleoside binding; GO:0043167 ion binding; GO:0016817 hydrolase activity, acting on acid anhydrides; GO:0016787 hydrolase activity; GO:0000166 nucleotide binding; GO:0017111 nucleoside-triphosphatase activity; GO:1901363 heterocyclic compound binding; GO:0097159 organic …	K03231	EEF1A; elongation factor 1-alpha	sly03013 RNA transport - Solanum lycopersicum (tomato);	IPR004160; IPR004161; IPR009001; IPR027417; IPR000795; IPR009000;	Translation elongation factor EFTu/EF1A, C-terminal; Translation elongation factor EFTu-like, domain 2; Translation elongation factor EF1A/initiation factor IF2gamma, C-terminal; P-loop containing nucleoside triphosphate hydrolase; Transcription factor, GTP-binding domain; Translation protein, beta-barrel domain;	J	KOG0052	Translation elongation factor EF-1 alpha/Tu
A0A1U8ELC7	Uncharacterized protein OS=Capsicum annuum OX=4072 GN=T459_27672	T459_27672	14.715	24.866	15.3	2	3	2	0.93	0.964	0.942	0.991	1.056	1.034	1.086	0.0182353	chloroplast				K07466	RFA1; replication factor A1	sly03440 Homologous recombination - Solanum lycopersicum (tomato); sly03030 DNA replication - Solanum lycopersicum (tomato); sly03420 Nucleotide excision repair - Solanum lycopersicum (tomato); sly03430 Mismatch repair - Solanum lycopersicum (tomato);	IPR012340;	Nucleic acid-binding, OB-fold;
A0A1U8ELG6	Uncharacterized protein OS=Capsicum annuum OX=4072 GN=T459_28775	T459_28775	30.657	106.45	21.3	5	20	5	1.024	1.066	1.017	0.966	1.008	0.928	0.934	0.070579	plasma membrane	GO:0006810 transport; GO:0051179 localization; GO:0051234 establishment of localization;	GO:0016020 membrane;	GO:0005215 transporter activity;	K09872			IPR023271;	Aquaporin-like;	G	KOG0223	Aquaporin (major intrinsic protein family)
A0A1U8ELJ3	Lactoylglutathione lyase OS=Capsicum annuum OX=4072 GN=T459_28676	T459_28676	25.808	95.533	49.8	9	17	9	1.006	1.023	1.026	0.994	0.999	0.999	0.979	0.030705	chloroplast			GO:0004462 lactoylglutathione lyase activity; GO:0046872 metal ion binding; GO:0043169 cation binding; GO:0016829 lyase activity; GO:0016846 carbon-sulfur lyase activity; GO:0003824 catalytic activity; GO:0005488 binding; GO:0043167 ion binding;	K01759	GLO1; lactoylglutathione lyase [EC:4.4.1.5]	sly00620 Pyruvate metabolism - Solanum lycopersicum (tomato);	IPR029068; IPR004360;	Glyoxalase/Bleomycin resistance protein/Dihydroxybiphenyl dioxygenase; Glyoxalase/fosfomycin resistance/dioxygenase domain;	G	KOG2944	Glyoxalase
A0A1U8ELJ5	Uncharacterized protein OS=Capsicum annuum OX=4072 GN=T459_26814	T459_26814	58.715	6.2984	7.8	3	4	3	0.985	1.012	0.952	1.037	0.993	1.025	1.036	0.181061	cytoplasm							IPR001279;	Metallo-beta-lactamase;	R	KOG0813	Glyoxylase
A0A1U8ELM1	Uncharacterized protein OS=Capsicum annuum OX=4072 GN=T459_32593	T459_32593	90.778	265.89	35.6	23	58	19	0.993	1.004	1.004	0.993	1.003	0.987	0.994	0.36896	chloroplast	GO:0006457 protein folding; GO:0006950 response to stress; GO:0050896 response to stimulus; GO:0009987 cellular process;		GO:0005524 ATP binding; GO:1901265 nucleoside phosphate binding; GO:0001882 nucleoside binding; GO:0043167 ion binding; GO:0005515 protein binding; GO:0000166 nucleotide binding; GO:0097159 organic cyclic compound binding; GO:1901363 heterocyclic compound binding; GO:0032549 ribonucleoside binding; GO:0097367 carbohydrate derivative binding; GO:0032553 ribonucleotide binding; GO:0005488 binding; …	K09487	HSP90B; heat shock protein 90kDa beta	sly04626 Plant-pathogen interaction - Solanum lycopersicum (tomato); sly04141 Protein processing in endoplasmic reticulum - Solanum lycopersicum (tomato);	IPR020575; IPR020568; IPR003594;	Heat shock protein Hsp90, N-terminal; Ribosomal protein S5 domain 2-type fold; Histidine kinase-like ATPase, C-terminal domain;	O	KOG0019	Molecular chaperone (HSP90 family)
A0A1U8ELM8	Ras-related protein RABH1c OS=Capsicum annuum OX=4072 GN=T459_03166	T459_03166	23.071	23.763	41.8	8	12	8	1.019	0.975	0.938	1.045	0.986	1.036	1.046	0.20592	chloroplast	GO:0050794 regulation of cellular process; GO:0044700 single organism signaling; GO:0051716 cellular response to stimulus; GO:0007165 signal transduction; GO:0050789 regulation of biological process; GO:0007154 cell communication; GO:0035556 intracellular signal transduction; GO:0044699 single-organism process; GO:0007264 small GTPase mediated signal transduction; GO:0023052 signaling; GO:0050896…		GO:1901265 nucleoside phosphate binding; GO:0001882 nucleoside binding; GO:0043167 ion binding; GO:0000166 nucleotide binding; GO:0097159 organic cyclic compound binding; GO:1901363 heterocyclic compound binding; GO:0032549 ribonucleoside binding; GO:0097367 carbohydrate derivative binding; GO:0032553 ribonucleotide binding; GO:0005488 binding; GO:0032550 purine ribonucleoside binding; GO:0043168…	K07893			IPR005225; IPR027417;	Small GTP-binding protein domain; P-loop containing nucleoside triphosphate hydrolase;	U	KOG0094	GTPase Rab6/YPT6/Ryh1, small G protein superfamily
A0A1U8ELP4	Leukotriene A-4 hydrolase-like protein OS=Capsicum annuum OX=4072 GN=T459_28476	T459_28476	68.807	54.153	24.3	11	12	11	1.024	1.036	1.044	0.943	0.985	0.967	0.933	0.0072209	cytoplasm			GO:0008233 peptidase activity; GO:0046914 transition metal ion binding; GO:0003824 catalytic activity; GO:0005488 binding; GO:0043167 ion binding; GO:0070011 peptidase activity, acting on L-amino acid peptides; GO:0046872 metal ion binding; GO:0043169 cation binding; GO:0016787 hydrolase activity; GO:0008237 metallopeptidase activity; GO:0008270 zinc ion binding;	K01254	LTA4H; leukotriene-A4 hydrolase [EC:3.3.2.6]	sly00590 Arachidonic acid metabolism - Solanum lycopersicum (tomato); sly01100 Metabolic pathways - Solanum lycopersicum (tomato);	IPR014782; IPR015211; IPR016024;	Peptidase M1, membrane alanine aminopeptidase, N-terminal; Peptidase M1, leukotriene A4 hydrolase/aminopeptidase C-terminal; Armadillo-type fold;	IOVE	KOG1047	Bifunctional leukotriene A4 hydrolase/aminopeptidase LTA4H
A0A1U8ELR0	Uncharacterized protein OS=Capsicum annuum OX=4072 GN=T459_27126	T459_27126	34.612	6.567	14.9	4	5	4	0.998	0.968	1.046	1.045	0.893	1.021	0.982	0.73456	chloroplast	GO:0044085 cellular component biogenesis; GO:0042254 ribosome biogenesis; GO:0022613 ribonucleoprotein complex biogenesis; GO:0042274 ribosomal small subunit biogenesis; GO:0071840 cellular component organization or biogenesis;						IPR028989;	Ribosome maturation factor RimP, N-terminal;
A0A1U8ELR8	Uncharacterized protein OS=Capsicum annuum OX=4072 GN=T459_28299	T459_28299	35.871	28.399	23.1	7	10	7	1.048	1.011	0.993	0.997	0.992	0.947	0.962	0.164176	cytoplasm			GO:0048037 cofactor binding; GO:0003824 catalytic activity; GO:0005488 binding; GO:0050662 coenzyme binding;				IPR001509; IPR016040;	NAD-dependent epimerase/dehydratase; NAD(P)-binding domain;	V	KOG1502	Flavonol reductase/cinnamoyl-CoA reductase
[truncated: 4,196 more rows]
