# Supplementary material for: Comparative proteomic analysis of pepper (Capsicum annuum L.) seedlings under selenium stress
Source: PeerJ. 2019 Nov 27;7:e8020. doi: 10.7717/peerj.8020 (PMC6884995; doi:10.7717/peerj.8020)
Supplement: Supplemental Information 6 [file peerj-07-8020-s006.xlsx]

## Sheet: TableS4
Table S4.The detail information of DEPs.
Protein accession	Protein description	Se/CK Ratio	Regulated Type	Se/Mock P value	Gene name	MW [kDa]	Score	Coverage [%]	Mock_1	Mock_2	Mock_3	Se_1	Se_2	Se_3	Subcellular localization	Biological Process	Cellular Component	Molecular Function	KEGG KO No.	KEGG Gene	KEGG pathway	IPR ID	Domain description
A0A059P1E3	Patatin OS=Capsicum annuum OX=4072 GN=PLP1	2.119	Up	1.60185e-05	PLP1	45.298	43.091	25.7	0.626	0.611	0.665	1.338	1.316	1.376	chloroplast	GO:0016042 lipid catabolic process; GO:1901575 organic substance catabolic process; GO:0008152 metabolic process; GO:0044710 single-organism metabolic process; GO:0044712 single-organism catabolic process; GO:0044699 single-organism process; GO:0044238 primary metabolic process; GO:0009056 catabolic process; GO:0071704 organic substance metabolic process; GO:0006629 lipid metabolic process;		GO:0016787 hydrolase activity; GO:0003824 catalytic activity;				IPR016035; IPR002641;	Acyl transferase/acyl hydrolase/lysophospholipase; Patatin/Phospholipase A2-related;
A0A075B8I5	ABA-responsive protein 1 OS=Capsicum annuum OX=4072 GN=ABR1	2.983	Up	7.0795e-07	ABR1	31.696	185.86	55.3	0.482	0.504	0.493	1.413	1.512	1.487	nucleus							IPR004182;	GRAM domain;
A0A1U8DTQ7	Uncharacterized protein OS=Capsicum annuum OX=4072 GN=T459_21359	1.619	Up	1.9546e-05	T459_21359	25.038	63.434	43.9	0.754	0.746	0.783	1.239	1.199	1.258	nucleus				K04507			IPR015120; IPR007052; IPR007699; IPR008978;	Siah interacting protein, N-terminal; CS domain; SGS domain; HSP20-like chaperone;
A0A1U8DU50	Phosphoglycerate mutase-like protein AT74H OS=Capsicum annuum OX=4072 GN=T459_22329	2.173	Up	0.0101024	T459_22329	34.719	2.6934	8.8	0.693	0.653	0.534	1.381	1.358	1.346	cytoplasm	GO:0008152 metabolic process;		GO:0003824 catalytic activity;
A0A1U8DW23	Peroxidase OS=Capsicum annuum OX=4072 GN=T459_32043	1.569	Up	2.2029e-05	T459_32043	36.129	71.306	23.5	0.755	0.755	0.794	1.22	1.178	1.217	plasma membrane	GO:0008152 metabolic process; GO:0042743 hydrogen peroxide metabolic process; GO:0006950 response to stress; GO:0072593 reactive oxygen species metabolic process; GO:0055114 oxidation-reduction process; GO:0044710 single-organism metabolic process; GO:0006979 response to oxidative stress; GO:0044699 single-organism process; GO:0044248 cellular catabolic process; GO:0050896 response to stimulus; G…		GO:0097159 organic cyclic compound binding; GO:1901363 heterocyclic compound binding; GO:0020037 heme binding; GO:0003824 catalytic activity; GO:0005488 binding; GO:0016209 antioxidant activity; GO:0004601 peroxidase activity; GO:0046906 tetrapyrrole binding; GO:0016491 oxidoreductase activity; GO:0016684 oxidoreductase activity, acting on peroxide as acceptor;	K00430	E1.11.1.7; peroxidase [EC:1.11.1.7]	sly01110 Biosynthesis of secondary metabolites - Solanum lycopersicum (tomato); sly00940 Phenylpropanoid biosynthesis - Solanum lycopersicum (tomato); sly01100 Metabolic pathways - Solanum lycopersicum (tomato);	IPR033905; IPR002016;	Secretory peroxidase; Haem peroxidase, plant/fungal/bacterial;
A0A1U8DWR1	18.5 kDa class I heat shock protein OS=Capsicum annuum OX=4072 GN=T459_32220	10.623	Up	0.00083969	T459_32220	18.225	55.893	30.2	0.169	0.19	0.15	1.826	1.801	1.78	cytoplasm				K13993	HSP20; HSP20 family protein	sly04141 Protein processing in endoplasmic reticulum - Solanum lycopersicum (tomato);	IPR002068; IPR008978;	Alpha crystallin/Hsp20 domain; HSP20-like chaperone;
A0A1U8DXD5	Extra-large guanine nucleotide-binding protein 2 OS=Capsicum annuum OX=4072 GN=T459_31775	1.585	Up	0.00069858	T459_31775	103.61	4.6272	2.7	0.79	0.807	0.715	1.149	1.277	1.238	nucleus	GO:0007186 G-protein coupled receptor signaling pathway; GO:0050794 regulation of cellular process; GO:0044700 single organism signaling; GO:0051716 cellular response to stimulus; GO:0007165 signal transduction; GO:0050789 regulation of biological process; GO:0007154 cell communication; GO:0044699 single-organism process; GO:0023052 signaling; GO:0050896 response to stimulus; GO:0009987 cellular …		GO:1901265 nucleoside phosphate binding; GO:0044877 macromolecular complex binding; GO:0031683 G-protein beta/gamma-subunit complex binding; GO:0016817 hydrolase activity, acting on acid anhydrides; GO:0016787 hydrolase activity; GO:0005515 protein binding; GO:0000166 nucleotide binding; GO:0017111 nucleoside-triphosphatase activity; GO:0004871 signal transducer activity; GO:1901363 heterocyclic …				IPR027417; IPR011025;	P-loop containing nucleoside triphosphate hydrolase; G protein alpha subunit, helical insertion;
A0A1U8DY44	Uncharacterized protein OS=Capsicum annuum OX=4072 GN=T459_32134	2.386	Up	0.00040092	T459_32134	48.346	47.73	23.6	0.569	0.586	0.604	1.398	1.393	1.406	cytoplasm				K19366	SPG20; spartin	sly04144 Endocytosis - Solanum lycopersicum (tomato);	IPR009686;	Senescence/spartin-associated;
A0A1U8DZ99	Charged multivesicular body protein 2a OS=Capsicum annuum OX=4072 GN=T459_24369	1.861	Up	0.0042169	T459_24369	25.034	1.1873	4.5	0.746	0.729	0.607	1.097	1.454	1.324	cytoplasm	GO:0006810 transport; GO:0051179 localization; GO:0007034 vacuolar transport; GO:0051234 establishment of localization;			K12191	CHMP2A; charged multivesicular body protein 2A	sly04144 Endocytosis - Solanum lycopersicum (tomato);
A0A1U8DZV9	9-divinyl ether synthase OS=Capsicum annuum OX=4072 GN=T459_31777	4.927	Up	1.96677e-05	T459_31777	54.061	94.023	42.1	0.362	0.289	0.335	1.58	1.668	1.61	chloroplast	GO:0044699 single-organism process; GO:0008152 metabolic process; GO:0055114 oxidation-reduction process; GO:0044710 single-organism metabolic process;		GO:0097159 organic cyclic compound binding; GO:1901363 heterocyclic compound binding; GO:0020037 heme binding; GO:0005506 iron ion binding; GO:0046914 transition metal ion binding; GO:0003824 catalytic activity; GO:0005488 binding; GO:0043167 ion binding; GO:0043169 cation binding; GO:0046872 metal ion binding; GO:0016705 oxidoreductase activity, acting on paired donors, with incorporation or red…	K17874
A0A1U8E166	"Hydroxymethylglutaryl-CoA lyase, mitochondrial OS=Capsicum annuum OX=4072 GN=T459_02763"	1.788	Up	0.00039971	T459_02763	45.332	1.6164	5.5	0.73	0.754	0.662	1.351	1.194	1.291	chloroplast,mitochondria			GO:0003824 catalytic activity;	K01640	E4.1.3.4; hydroxymethylglutaryl-CoA lyase [EC:4.1.3.4]	sly00650 Butanoate metabolism - Solanum lycopersicum (tomato); sly00072 Synthesis and degradation of ketone bodies - Solanum lycopersicum (tomato); sly00280 Valine, leucine and isoleucine degradation - Solanum lycopersicum (tomato); sly04146 Peroxisome - Solanum lycopersicum (tomato); sly01100 Metabolic pathways - Solanum lycopersicum (tomato);	IPR013785; IPR000891;	Aldolase-type TIM barrel; Pyruvate carboxyltransferase;
A0A1U8E2S3	Glycine cleavage system P protein OS=Capsicum annuum OX=4072 GN=T459_21274	1.978	Up	0.0043442	T459_21274	113.22	4.104	33.8	0.771	0.67	0.558	1.14	1.444	1.371	mitochondria	GO:1901606 alpha-amino acid catabolic process; GO:0044699 single-organism process; GO:0006544 glycine metabolic process; GO:0044237 cellular metabolic process; GO:0071704 organic substance metabolic process; GO:0006546 glycine catabolic process; GO:0008152 metabolic process; GO:0006520 cellular amino acid metabolic process; GO:0044248 cellular catabolic process; GO:0009987 cellular process; GO:00…		GO:0016638 oxidoreductase activity, acting on the CH-NH2 group of donors; GO:0016642 oxidoreductase activity, acting on the CH-NH2 group of donors, disulfide as acceptor; GO:0003824 catalytic activity; GO:0004375 glycine dehydrogenase (decarboxylating) activity; GO:0016491 oxidoreductase activity;	K00281	GLDC; glycine dehydrogenase [EC:1.4.4.2]	sly00260 Glycine, serine and threonine metabolism - Solanum lycopersicum (tomato); sly01110 Biosynthesis of secondary metabolites - Solanum lycopersicum (tomato); sly00630 Glyoxylate and dicarboxylate metabolism - Solanum lycopersicum (tomato); sly01200 Carbon metabolism - Solanum lycopersicum (tomato); sly01100 Metabolic pathways - Solanum lycopersicum (tomato);	IPR015424; IPR015421;	Pyridoxal phosphate-dependent transferase; Pyridoxal phosphate-dependent transferase, major region, subdomain 1;
A0A1U8E433	Phosphoglycerate mutase-like protein AT74 OS=Capsicum annuum OX=4072 GN=T459_22330	1.997	Up	3.8325e-06	T459_22330	33.311	24.816	29.6	0.638	0.67	0.685	1.346	1.301	1.333	mitochondria	GO:0008152 metabolic process;		GO:0003824 catalytic activity;
A0A1U8E5W4	Uncharacterized protein OS=Capsicum annuum OX=4072 GN=T459_34118	0.489	Down	0.00025569	T459_34118	13.739	38.296	13.3	1.384	1.366	1.314	0.675	0.593	0.718	cytoplasm
A0A1U8E671	Cytokinin riboside 5'-monophosphate phosphoribohydrolase OS=Capsicum annuum OX=4072 GN=T459_22622	1.736	Up	0.0033959	T459_22622	23.99	2.8281	8.7	0.695	0.723	0.76	1.104	1.467	1.211	cytoplasm				K22522
A0A1U8E6M6	18.5 kDa class I heat shock protein OS=Capsicum annuum OX=4072 GN=T459_32218	15.569	Up	1.5158e-06	T459_32218	18.122	-2	27.7	0.136	0.113	0.108	1.892	1.778	1.888	cytoplasm				K13993	HSP20; HSP20 family protein	sly04141 Protein processing in endoplasmic reticulum - Solanum lycopersicum (tomato);	IPR002068; IPR008978;	Alpha crystallin/Hsp20 domain; HSP20-like chaperone;
A0A1U8E7F1	Putative glutathione S-transferase OS=Capsicum annuum OX=4072 GN=T459_23071	1.664	Up	0.00038072	T459_23071	25.308	9.5514	16.1	0.728	0.815	0.702	1.257	1.26	1.218	chloroplast			GO:0005515 protein binding; GO:0005488 binding;	K00799	GST; glutathione S-transferase [EC:2.5.1.18]	sly00480 Glutathione metabolism - Solanum lycopersicum (tomato);	IPR004046; IPR010987; IPR012336; IPR004045;	Glutathione S-transferase, C-terminal; Glutathione S-transferase, C-terminal-like; Thioredoxin-like fold; Glutathione S-transferase, N-terminal;
A0A1U8E7M0	Protein LURP-one-related 15 OS=Capsicum annuum OX=4072 GN=T459_25832	1.502	Up	0.0057822	T459_25832	23.672	6.7247	7.6	0.701	0.874	0.818	1.126	1.181	1.287	nucleus							IPR025659; IPR007612;	Tubby C-terminal-like domain; LURP1-related protein domain;
A0A1U8E820	18.5 kDa class I heat shock protein OS=Capsicum annuum OX=4072 GN=T459_32217	4.088	Up	1.63866e-05	T459_32217	18.093	8.0286	30.8	0.355	0.419	0.393	1.613	1.642	1.516	cytoplasm				K13993	HSP20; HSP20 family protein	sly04141 Protein processing in endoplasmic reticulum - Solanum lycopersicum (tomato);	IPR002068; IPR008978;	Alpha crystallin/Hsp20 domain; HSP20-like chaperone;
A0A1U8E953	Arginine decarboxylase OS=Capsicum annuum OX=4072 GN=T459_01418	3.279	Up	4.8968e-06	T459_01418	78.211	1.9505	2.3	0.49	0.471	0.429	1.488	1.502	1.568	endoplasmic reticulum	GO:1901606 alpha-amino acid catabolic process; GO:0008216 spermidine metabolic process; GO:0044699 single-organism process; GO:0097164 ammonium ion metabolic process; GO:0009058 biosynthetic process; GO:1901566 organonitrogen compound biosynthetic process; GO:0044237 cellular metabolic process; GO:0006576 cellular biogenic amine metabolic process; GO:0071704 organic substance metabolic process; G…		GO:0016831 carboxy-lyase activity; GO:0016829 lyase activity; GO:0003824 catalytic activity; GO:0016830 carbon-carbon lyase activity; GO:0008792 arginine decarboxylase activity;	K01583	E4.1.1.19; arginine decarboxylase [EC:4.1.1.19]	sly00330 Arginine and proline metabolism - Solanum lycopersicum (tomato); sly01100 Metabolic pathways - Solanum lycopersicum (tomato);	IPR022643; IPR009006; IPR029066; IPR022644;	Orn/DAP/Arg decarboxylase 2, C-terminal; Alanine racemase/group IV decarboxylase, C-terminal; PLP-binding barrel; Orn/DAP/Arg decarboxylase 2, N-terminal;
A0A1U8EBI9	Uncharacterized protein OS=Capsicum annuum OX=4072 GN=T459_01949	0.555	Down	0.00104413	T459_01949	25.35	1.9209	9.7	1.378	1.255	1.25	0.675	0.671	0.81	cytoplasm							IPR024286; IPR029055;	Domain of unknown function DUF3700; Nucleophile aminohydrolases, N-terminal;
A0A1U8EC90	"Magnesium-protoporphyrin IX monomethyl ester [oxidative] cyclase, chloroplastic OS=Capsicum annuum OX=4072 GN=T459_32698"	0.652	Down	1.0817e-07	T459_32698	46.645	55.818	33	1.208	1.212	1.203	0.796	0.783	0.783	chloroplast	GO:0051188 cofactor biosynthetic process; GO:0046148 pigment biosynthetic process; GO:0006725 cellular aromatic compound metabolic process; GO:0015994 chlorophyll metabolic process; GO:0044699 single-organism process; GO:0009058 biosynthetic process; GO:1901566 organonitrogen compound biosynthetic process; GO:0044237 cellular metabolic process; GO:0071704 organic substance metabolic process; GO:0…		GO:0016709 oxidoreductase activity, acting on paired donors, with incorporation or reduction of molecular oxygen, NAD(P)H as one donor, and incorporation of one atom of oxygen; GO:0003824 catalytic activity; GO:0005488 binding; GO:0043167 ion binding; GO:0043169 cation binding; GO:0046872 metal ion binding; GO:0016705 oxidoreductase activity, acting on paired donors, with incorporation or reducti…	K04035	E1.14.13.81; magnesium-protoporphyrin IX monomethyl ester (oxidative) cyclase [EC:1.14.13.81]	sly00860 Porphyrin and chlorophyll metabolism - Solanum lycopersicum (tomato); sly01110 Biosynthesis of secondary metabolites - Solanum lycopersicum (tomato); sly01100 Metabolic pathways - Solanum lycopersicum (tomato);	IPR009078; IPR003251;	Ferritin-like superfamily; Rubrerythrin;
A0A1U8EDA7	Uncharacterized protein OS=Capsicum annuum OX=4072 GN=T459_03183	1.536	Up	0.000123166	T459_03183	33.116	26.188	19.1	0.805	0.808	0.746	1.192	1.191	1.241	nucleus			GO:0097159 organic cyclic compound binding; GO:1901363 heterocyclic compound binding; GO:1901265 nucleoside phosphate binding; GO:0005488 binding; GO:0003676 nucleic acid binding; GO:0000166 nucleotide binding; GO:0036094 small molecule binding;	K09537			IPR000504; IPR034254; IPR012677; IPR001623;	RNA recognition motif domain; DNAJC17, RNA recognition motif; Nucleotide-binding alpha-beta plait domain; DnaJ domain;
A0A1U8EDK9	Uncharacterized protein OS=Capsicum annuum OX=4072 GN=T459_23984	2.671	Up	0.00146297	T459_23984	71.09	5.3628	6.1	0.538	0.544	0.542	1.419	1.367	1.551	cytoplasm							IPR013536; IPR029071; IPR018997;	WLM domain; Ubiquitin-related domain; PUB domain;
A0A1U8EFD1	Uncharacterized protein OS=Capsicum annuum OX=4072 GN=T459_23511	3.158	Up	2.9435e-06	T459_23511	60.522	19.924	10.1	0.465	0.501	0.519	1.594	1.513	1.583	nucleus	GO:0050794 regulation of cellular process; GO:0010468 regulation of gene expression; GO:0006355 regulation of transcription, DNA-templated; GO:0031326 regulation of cellular biosynthetic process; GO:0080090 regulation of primary metabolic process; GO:0060255 regulation of macromolecule metabolic process; GO:0019219 regulation of nucleobase-containing compound metabolic process; GO:0010556 regulat…		GO:0097159 organic cyclic compound binding; GO:1901363 heterocyclic compound binding; GO:0003677 DNA binding; GO:0005488 binding; GO:0001071 nucleic acid binding transcription factor activity; GO:0003676 nucleic acid binding; GO:0043565 sequence-specific DNA binding; GO:0003700 transcription factor activity, sequence-specific DNA binding;	K13424	WRKY33; WRKY transcription factor 33	sly04016 MAPK signaling pathway - plant - Solanum lycopersicum (tomato); sly04626 Plant-pathogen interaction - Solanum lycopersicum (tomato);	IPR003657;	WRKY domain;
A0A1U8EGX0	Uncharacterized protein OS=Capsicum annuum OX=4072 GN=T459_24955	0.304	Down	4.7903e-07	T459_24955	12.808	2.4655	7.7	1.595	1.569	1.488	0.482	0.465	0.467	extracellular
A0A1U8EHD5	Calcium-binding protein CAST OS=Capsicum annuum OX=4072 GN=T459_25401	2.076	Up	8.2351e-05	T459_25401	22.555	28.813	14.5	0.696	0.633	0.612	1.406	1.303	1.32	cytoplasm			GO:0043169 cation binding; GO:0046872 metal ion binding; GO:0005509 calcium ion binding; GO:0005488 binding; GO:0043167 ion binding;	K13448	CML; calcium-binding protein CML	sly04626 Plant-pathogen interaction - Solanum lycopersicum (tomato);	IPR011992; IPR002048;	EF-hand domain pair; EF-hand domain;
A0A1U8ELC6	Elongation factor 1-alpha OS=Capsicum annuum OX=4072 GN=T459_28941	1.823	Up	0.00075547	T459_28941	49.351	18.042	38.8	0.739	0.746	0.628	1.225	1.368	1.26	cytoplasm	GO:0006518 peptide metabolic process; GO:0006414 translational elongation; GO:0043043 peptide biosynthetic process; GO:0044267 cellular protein metabolic process; GO:0006807 nitrogen compound metabolic process; GO:0009058 biosynthetic process; GO:0043603 cellular amide metabolic process; GO:0044238 primary metabolic process; GO:1901566 organonitrogen compound biosynthetic process; GO:1901576 orga…	GO:0044424 intracellular part; GO:0005623 cell; GO:0044464 cell part; GO:0005622 intracellular; GO:0005737 cytoplasm;	GO:0003723 RNA binding; GO:1901265 nucleoside phosphate binding; GO:0003746 translation elongation factor activity; GO:0001882 nucleoside binding; GO:0043167 ion binding; GO:0016817 hydrolase activity, acting on acid anhydrides; GO:0016787 hydrolase activity; GO:0000166 nucleotide binding; GO:0017111 nucleoside-triphosphatase activity; GO:1901363 heterocyclic compound binding; GO:0097159 organic …	K03231	EEF1A; elongation factor 1-alpha	sly03013 RNA transport - Solanum lycopersicum (tomato);	IPR004160; IPR004161; IPR009001; IPR027417; IPR000795; IPR009000;	Translation elongation factor EFTu/EF1A, C-terminal; Translation elongation factor EFTu-like, domain 2; Translation elongation factor EF1A/initiation factor IF2gamma, C-terminal; P-loop containing nucleoside triphosphate hydrolase; Transcription factor, GTP-binding domain; Translation protein, beta-barrel domain;
A0A1U8EPD7	Uncharacterized protein OS=Capsicum annuum OX=4072 GN=T459_10340	1.619	Up	0.0021751	T459_10340	40.36	20.144	38.1	0.758	0.76	0.765	1.184	1.233	1.279	cytoplasm	GO:0016051 carbohydrate biosynthetic process; GO:0044711 single-organism biosynthetic process; GO:0006073 cellular glucan metabolic process; GO:0000271 polysaccharide biosynthetic process; GO:0030243 cellulose metabolic process; GO:0044042 glucan metabolic process; GO:0044763 single-organism cellular process; GO:0044699 single-organism process; GO:0033692 cellular polysaccharide biosynthetic proc…		GO:0016853 isomerase activity; GO:0016866 intramolecular transferase activity; GO:0003824 catalytic activity;	K13379	RGP; reversibly glycosylated polypeptide / UDP-arabinopyranose mutase [EC:2.4.1.- 5.4.99.30]	sly00520 Amino sugar and nucleotide sugar metabolism - Solanum lycopersicum (tomato);	IPR029044;	Nucleotide-diphospho-sugar transferases;
A0A1U8EPX9	Secologanin synthase OS=Capsicum annuum OX=4072 GN=T459_24817	2.515	Up	5.6075e-07	T459_24817	59.956	1.9631	5.4	0.573	0.552	0.569	1.377	1.44	1.444	chloroplast	GO:0044699 single-organism process; GO:0008152 metabolic process; GO:0055114 oxidation-reduction process; GO:0044710 single-organism metabolic process;		GO:0097159 organic cyclic compound binding; GO:1901363 heterocyclic compound binding; GO:0020037 heme binding; GO:0005506 iron ion binding; GO:0046914 transition metal ion binding; GO:0003824 catalytic activity; GO:0005488 binding; GO:0043167 ion binding; GO:0043169 cation binding; GO:0046872 metal ion binding; GO:0016705 oxidoreductase activity, acting on paired donors, with incorporation or red…	K07428
A0A1U8ER46	Uncharacterized protein OS=Capsicum annuum OX=4072 GN=T459_24808	0.492	Down	1.54459e-05	T459_24808	12.212	3.1435	15.8	1.349	1.375	1.33	0.648	0.648	0.697	extracellular
A0A1U8ETH5	ABC transporter F family member 5 OS=Capsicum annuum OX=4072 GN=T459_30294	0.588	Down	0.0028952	T459_30294	78.973	1.3033	1.4	1.218	1.397	1.192	0.798	0.653	0.789	cytoplasm			GO:0005524 ATP binding; GO:1901265 nucleoside phosphate binding; GO:0001882 nucleoside binding; GO:0043167 ion binding; GO:0016817 hydrolase activity, acting on acid anhydrides; GO:0016787 hydrolase activity; GO:0000166 nucleotide binding; GO:0017111 nucleoside-triphosphatase activity; GO:0016887 ATPase activity; GO:0097159 organic cyclic compound binding; GO:1901363 heterocyclic compound binding…				IPR032781; IPR003593; IPR003439; IPR027417;	ABC-transporter extension domain; AAA+ ATPase domain; ABC transporter-like; P-loop containing nucleoside triphosphate hydrolase;
A0A1U8EUP0	Inositol-3-phosphate synthase OS=Capsicum annuum OX=4072 GN=T459_30253	1.513	Up	3.5594e-05	T459_30253	56.388	4.7935	5.5	0.785	0.81	0.764	1.184	1.213	1.171	cytoplasm	GO:0016051 carbohydrate biosynthetic process; GO:1901615 organic hydroxy compound metabolic process; GO:0006066 alcohol metabolic process; GO:0006020 inositol metabolic process; GO:0008654 phospholipid biosynthetic process; GO:0006021 inositol biosynthetic process; GO:0044699 single-organism process; GO:0044255 cellular lipid metabolic process; GO:0009058 biosynthetic process; GO:0044237 cellular…		GO:0016872 intramolecular lyase activity; GO:0004512 inositol-3-phosphate synthase activity; GO:0016853 isomerase activity; GO:0003824 catalytic activity;	K01858	INO1; myo-inositol-1-phosphate synthase [EC:5.5.1.4]	sly00562 Inositol phosphate metabolism - Solanum lycopersicum (tomato); sly01100 Metabolic pathways - Solanum lycopersicum (tomato);	IPR013021; IPR016040;	Myo-inositol-1-phosphate synthase, GAPDH-like; NAD(P)-binding domain;
A0A1U8EWI6	Uncharacterized protein OS=Capsicum annuum OX=4072 GN=T459_31824	3.689	Up	1.67363e-05	T459_31824	56.854	5.0625	8.4	0.39	0.43	0.448	1.509	1.516	1.653	chloroplast	GO:0044699 single-organism process; GO:0008152 metabolic process; GO:0055114 oxidation-reduction process; GO:0044710 single-organism metabolic process;		GO:0097159 organic cyclic compound binding; GO:1901363 heterocyclic compound binding; GO:0020037 heme binding; GO:0005506 iron ion binding; GO:0046914 transition metal ion binding; GO:0003824 catalytic activity; GO:0005488 binding; GO:0043167 ion binding; GO:0043169 cation binding; GO:0046872 metal ion binding; GO:0016705 oxidoreductase activity, acting on paired donors, with incorporation or red…	K15472	CYP71D55; premnaspirodiene oxygenase [EC:1.14.14.151]	sly01110 Biosynthesis of secondary metabolites - Solanum lycopersicum (tomato); sly00909 Sesquiterpenoid and triterpenoid biosynthesis - Solanum lycopersicum (tomato);
A0A1U8EXX6	Mitochondrial fission 1 protein OS=Capsicum annuum OX=4072 GN=T459_31557	1.795	Up	0.0084624	T459_31557	18.25	1.1714	4.2	0.816	0.604	0.721	1.475	1.102	1.267	nucleus	GO:0016043 cellular component organization; GO:0006996 organelle organization; GO:0007005 mitochondrion organization; GO:0048285 organelle fission; GO:0009987 cellular process; GO:0000266 mitochondrial fission; GO:0071840 cellular component organization or biogenesis;		GO:0005515 protein binding; GO:0005488 binding;	K17969			IPR011990; IPR033745;	Tetratricopeptide-like helical domain; Mitochondria fission protein Fis1, cytosolic domain;
A0A1U8EYM1	Tyrosine aminotransferase OS=Capsicum annuum OX=4072 GN=T459_31139	2.399	Up	0.00038372	T459_31139	47.177	2.5787	2.6	0.541	0.642	0.575	1.506	1.239	1.472	cytoplasm	GO:0044281 small molecule metabolic process; GO:0044763 single-organism cellular process; GO:0006807 nitrogen compound metabolic process; GO:0044699 single-organism process; GO:0009058 biosynthetic process; GO:0044238 primary metabolic process; GO:0044237 cellular metabolic process; GO:0071704 organic substance metabolic process; GO:0008152 metabolic process; GO:0006520 cellular amino acid metabo…		GO:0097159 organic cyclic compound binding; GO:1901363 heterocyclic compound binding; GO:0016769 transferase activity, transferring nitrogenous groups; GO:0003824 catalytic activity; GO:0005488 binding; GO:0043167 ion binding; GO:0043168 anion binding; GO:0008483 transaminase activity; GO:0016740 transferase activity; GO:0048037 cofactor binding; GO:0030170 pyridoxal phosphate binding;	K00815	TAT; tyrosine aminotransferase [EC:2.6.1.5]	sly01110 Biosynthesis of secondary metabolites - Solanum lycopersicum (tomato); sly00350 Tyrosine metabolism - Solanum lycopersicum (tomato); sly00270 Cysteine and methionine metabolism - Solanum lycopersicum (tomato); sly00950 Isoquinoline alkaloid biosynthesis - Solanum lycopersicum (tomato); sly01230 Biosynthesis of amino acids - Solanum lycopersicum (tomato); sly01100 Metabolic pathways - Sol…	IPR004839; IPR015424; IPR015421; IPR015422;	Aminotransferase, class I/classII; Pyridoxal phosphate-dependent transferase; Pyridoxal phosphate-dependent transferase, major region, subdomain 1; Pyridoxal phosphate-dependent transferase, major region, subdomain 2;
A0A1U8EZ92	Uncharacterized protein OS=Capsicum annuum OX=4072 GN=T459_29783	3.065	Up	2.4095e-06	T459_29783	38.258	26.196	25.7	0.51	0.507	0.464	1.553	1.505	1.481	cytoplasm	GO:0044699 single-organism process; GO:0008152 metabolic process; GO:0055114 oxidation-reduction process; GO:0044710 single-organism metabolic process;		GO:0003824 catalytic activity; GO:0016491 oxidoreductase activity;	K22745			IPR016040; IPR023753;	NAD(P)-binding domain; FAD/NAD(P)-binding domain;
A0A1U8EZP2	Putative glutathione S-transferase OS=Capsicum annuum OX=4072 GN=T459_20467	5.189	Up	3.7286e-05	T459_20467	25.562	22.785	21.9	0.35	0.28	0.326	1.532	1.802	1.627	cytoplasm			GO:0005515 protein binding; GO:0005488 binding;	K00799	GST; glutathione S-transferase [EC:2.5.1.18]	sly00480 Glutathione metabolism - Solanum lycopersicum (tomato);	IPR010987; IPR012336; IPR004045;	Glutathione S-transferase, C-terminal-like; Thioredoxin-like fold; Glutathione S-transferase, N-terminal;
A0A1U8F092	Uncharacterized protein OS=Capsicum annuum OX=4072 GN=T459_29772	1.859	Up	0.0008596	T459_29772	26.236	1.6921	6.4	0.649	0.787	0.654	1.241	1.275	1.37	mitochondria	GO:0006810 transport; GO:0051179 localization; GO:0007034 vacuolar transport; GO:0051234 establishment of localization;			K12198	CHMP5; charged multivesicular body protein 5	sly04144 Endocytosis - Solanum lycopersicum (tomato);
A0A1U8F3A2	Transcription factor HBP-1b(C1) OS=Capsicum annuum OX=4072 GN=T459_28028	1.646	Up	0.0028649	T459_28028	36.041	5.2845	7.4	0.722	0.856	0.685	1.31	1.154	1.262	nucleus	GO:0050794 regulation of cellular process; GO:0006725 cellular aromatic compound metabolic process; GO:0097659 nucleic acid-templated transcription; GO:0060255 regulation of macromolecule metabolic process; GO:0019219 regulation of nucleobase-containing compound metabolic process; GO:0009058 biosynthetic process; GO:0044237 cellular metabolic process; GO:0071704 organic substance metabolic proces…		GO:0097159 organic cyclic compound binding; GO:1901363 heterocyclic compound binding; GO:0003677 DNA binding; GO:0005488 binding; GO:0001071 nucleic acid binding transcription factor activity; GO:0003676 nucleic acid binding; GO:0043565 sequence-specific DNA binding; GO:0003700 transcription factor activity, sequence-specific DNA binding;	K14431	TGA; transcription factor TGA	sly04075 Plant hormone signal transduction - Solanum lycopersicum (tomato);	IPR004827; IPR025422;	Basic-leucine zipper domain; Transcription factor TGA like domain;
A0A1U8F3L8	Ubiquinol oxidase OS=Capsicum annuum OX=4072 GN=T459_01048	3.464	Up	0.0044823	T459_01048	36.504	4.9997	11.3	0.477	0.481	0.373	1.509	1.557	1.545	mitochondria	GO:0044699 single-organism process; GO:0008152 metabolic process; GO:0055114 oxidation-reduction process; GO:0044710 single-organism metabolic process;		GO:0016682 oxidoreductase activity, acting on diphenols and related substances as donors, oxygen as acceptor; GO:0016679 oxidoreductase activity, acting on diphenols and related substances as donors; GO:0003824 catalytic activity; GO:0009916 alternative oxidase activity; GO:0016491 oxidoreductase activity;	K17893
A0A1U8F481	Uncharacterized protein OS=Capsicum annuum OX=4072 GN=T459_25912	6.999	Up	0.0070959	T459_25912	19.898	14.397	15.1	0.279	0.287	0.172	1.67	1.762	1.733	extracellular
A0A1U8F6N4	Multiprotein-bridging factor 1c OS=Capsicum annuum OX=4072 GN=T459_14051	4.623	Up	1.52586e-05	T459_14051	15.784	4.9092	16.1	0.33	0.339	0.385	1.547	1.712	1.614	cytoplasm			GO:0097159 organic cyclic compound binding; GO:1901363 heterocyclic compound binding; GO:0003677 DNA binding; GO:0043565 sequence-specific DNA binding; GO:0005488 binding; GO:0003676 nucleic acid binding;	K03627			IPR010982; IPR013729; IPR001387;	Lambda repressor-like, DNA-binding domain; Multiprotein bridging factor 1, N-terminal; Cro/C1-type helix-turn-helix domain;
A0A1U8F981	SNAP25-like proteinous protein SNAP33 OS=Capsicum annuum OX=4072 GN=T459_17663	3.315	Up	0.0020764	T459_17663	34.043	24.035	14.7	0.335	0.6	0.447	1.583	1.414	1.584	nucleus			GO:0005515 protein binding; GO:0005488 binding;	K18211			IPR000727;	Target SNARE coiled-coil homology domain;
A0A1U8FBD0	Proline dehydrogenase OS=Capsicum annuum OX=4072 GN=T459_06801	2.603	Up	0.00046451	T459_06801	55.32	1.1548	1.6	0.554	0.51	0.584	1.24	1.645	1.404	mitochondria				K00318	PRODH; proline dehydrogenase [EC:1.5.-.-]	sly01110 Biosynthesis of secondary metabolites - Solanum lycopersicum (tomato); sly00330 Arginine and proline metabolism - Solanum lycopersicum (tomato); sly01100 Metabolic pathways - Solanum lycopersicum (tomato);	IPR002872; IPR029041;	Proline dehydrogenase domain; FAD-linked oxidoreductase-like;
A0A1U8FBI6	Pathogenesis-related protein STH-21 OS=Capsicum annuum OX=4072 GN=T459_31175	3.238	Up	3.288e-07	T459_31175	17.956	59.548	46.8	0.449	0.47	0.481	1.522	1.49	1.521	cytoplasm	GO:0006952 defense response; GO:0050896 response to stimulus; GO:0006950 response to stress; GO:0009607 response to biotic stimulus;						IPR023393; IPR000916;	START-like domain; Bet v I/Major latex protein;
A0A1U8FBU3	"Arogenate dehydrogenase 1, chloroplastic OS=Capsicum annuum OX=4072 GN=T459_19028"	1.76	Up	0.0026381	T459_19028	42.449	2.8159	5.9	0.658	0.838	0.673	1.295	1.183	1.339	chloroplast	GO:0006725 cellular aromatic compound metabolic process; GO:0016053 organic acid biosynthetic process; GO:0044699 single-organism process; GO:0009058 biosynthetic process; GO:1901566 organonitrogen compound biosynthetic process; GO:0044237 cellular metabolic process; GO:0071704 organic substance metabolic process; GO:0008152 metabolic process; GO:0006520 cellular amino acid metabolic process; GO:…	GO:0043226 organelle; GO:0043231 intracellular membrane-bounded organelle; GO:0043229 intracellular organelle; GO:0044464 cell part; GO:0005622 intracellular; GO:0005737 cytoplasm; GO:0044424 intracellular part; GO:0043227 membrane-bounded organelle; GO:0005623 cell; GO:0009536 plastid; GO:0044444 cytoplasmic part; GO:0009507 chloroplast;	GO:0016627 oxidoreductase activity, acting on the CH-CH group of donors; GO:0008977 prephenate dehydrogenase (NAD+) activity; GO:0016628 oxidoreductase activity, acting on the CH-CH group of donors, NAD or NADP as acceptor; GO:0003824 catalytic activity; GO:0004665 prephenate dehydrogenase (NADP+) activity; GO:0016491 oxidoreductase activity;	K15227	TYRAAT; arogenate dehydrogenase (NADP+), plant [EC:1.3.1.78]	sly00400 Phenylalanine, tyrosine and tryptophan biosynthesis - Solanum lycopersicum (tomato); sly01110 Biosynthesis of secondary metabolites - Solanum lycopersicum (tomato); sly01230 Biosynthesis of amino acids - Solanum lycopersicum (tomato); sly01100 Metabolic pathways - Solanum lycopersicum (tomato);	IPR003099; IPR008927; IPR016040;	Prephenate dehydrogenase; 6-phosphogluconate dehydrogenase C-terminal domain-like; NAD(P)-binding domain;
A0A1U8FC73	"Thiamine thiazole synthase, chloroplastic OS=Capsicum annuum OX=4072 GN=THI1"	0.548	Down	0.000136529	THI1	38.071	42.029	18.4	1.225	1.342	1.33	0.715	0.673	0.746	chloroplast	GO:0009110 vitamin biosynthetic process; GO:0006725 cellular aromatic compound metabolic process; GO:0044699 single-organism process; GO:0009058 biosynthetic process; GO:0042724 thiamine-containing compound biosynthetic process; GO:0050896 response to stimulus; GO:1901566 organonitrogen compound biosynthetic process; GO:0006772 thiamine metabolic process; GO:0044237 cellular metabolic process; GO…		GO:0003824 catalytic activity; GO:0016491 oxidoreductase activity;	K03146	THI4; cysteine-dependent adenosine diphosphate thiazole synthase [EC:2.4.2.60]	sly00730 Thiamine metabolism - Solanum lycopersicum (tomato); sly01100 Metabolic pathways - Solanum lycopersicum (tomato);	IPR023753;	FAD/NAD(P)-binding domain;
A0A1U8FD13	Uncharacterized protein OS=Capsicum annuum OX=4072 GN=T459_18901	1.589	Up	0.00034487	T459_18901	21.314	105.94	35.1	0.815	0.722	0.761	1.24	1.246	1.166	cytoplasm			GO:0005215 transporter activity;	K03098			IPR012674; IPR000566; IPR011038;	Calycin; Lipocalin/cytosolic fatty-acid binding domain; Calycin-like;
A0A1U8FEU9	1-aminocyclopropane-1-carboxylate oxidase 1 OS=Capsicum annuum OX=4072 GN=T459_19927	3.69	Up	1.6569e-06	T459_19927	36.059	30.526	25.4	0.411	0.421	0.436	1.657	1.525	1.497	cytoplasm	GO:0044699 single-organism process; GO:0008152 metabolic process; GO:0055114 oxidation-reduction process; GO:0044710 single-organism metabolic process;		GO:0003824 catalytic activity; GO:0016491 oxidoreductase activity;	K05933	E1.14.17.4; aminocyclopropanecarboxylate oxidase [EC:1.14.17.4]	sly01110 Biosynthesis of secondary metabolites - Solanum lycopersicum (tomato); sly00270 Cysteine and methionine metabolism - Solanum lycopersicum (tomato); sly01100 Metabolic pathways - Solanum lycopersicum (tomato);	IPR005123; IPR027443; IPR026992;	Oxoglutarate/iron-dependent dioxygenase; Isopenicillin N synthase-like; Non-haem dioxygenase N-terminal domain;
A0A1U8FG41	Cytochrome OS=Capsicum annuum OX=4072 GN=T459_33430	3.048	Up	0.00025765	T459_33430	60.209	2.632	4.3	0.51	0.416	0.544	1.425	1.432	1.623	chloroplast	GO:0044699 single-organism process; GO:0008152 metabolic process; GO:0055114 oxidation-reduction process; GO:0044710 single-organism metabolic process;		GO:0097159 organic cyclic compound binding; GO:1901363 heterocyclic compound binding; GO:0020037 heme binding; GO:0005506 iron ion binding; GO:0046914 transition metal ion binding; GO:0003824 catalytic activity; GO:0005488 binding; GO:0043167 ion binding; GO:0043169 cation binding; GO:0046872 metal ion binding; GO:0016705 oxidoreductase activity, acting on paired donors, with incorporation or red…
A0A1U8FJ05	1-aminocyclopropane-1-carboxylate oxidase 4 OS=Capsicum annuum OX=4072 GN=T459_19900	1.601	Up	1.67031e-05	T459_19900	36.33	12.63	15	0.75	0.779	0.769	1.193	1.253	1.233	cytoplasm	GO:0044699 single-organism process; GO:0008152 metabolic process; GO:0055114 oxidation-reduction process; GO:0044710 single-organism metabolic process;		GO:0003824 catalytic activity; GO:0016491 oxidoreductase activity;	K05933	E1.14.17.4; aminocyclopropanecarboxylate oxidase [EC:1.14.17.4]	sly01110 Biosynthesis of secondary metabolites - Solanum lycopersicum (tomato); sly00270 Cysteine and methionine metabolism - Solanum lycopersicum (tomato); sly01100 Metabolic pathways - Solanum lycopersicum (tomato);	IPR005123; IPR027443; IPR026992;	Oxoglutarate/iron-dependent dioxygenase; Isopenicillin N synthase-like; Non-haem dioxygenase N-terminal domain;
A0A1U8FJQ5	Uncharacterized protein OS=Capsicum annuum OX=4072 GN=T459_06811	2.286	Up	0.0022354	T459_06811	80.028	41.056	14.8	0.578	0.588	0.655	1.386	1.384	1.393	cytoplasm			GO:0004553 hydrolase activity, hydrolyzing O-glycosyl compounds; GO:0052736 beta-glucanase activity; GO:0016787 hydrolase activity; GO:0052861 glucan endo-1,3-beta-glucanase activity, C-3 substituted reducing group; GO:0003824 catalytic activity; GO:0016798 hydrolase activity, acting on glycosyl bonds;	K01180
A0A1U8FJW5	Uncharacterized protein OS=Capsicum annuum OX=4072 GN=T459_05332	0.588	Down	4.3445e-05	T459_05332	32.093	3.6345	6.6	1.248	1.315	1.24	0.729	0.729	0.777	chloroplast			GO:0003824 catalytic activity;				IPR013785;	Aldolase-type TIM barrel;
A0A1U8FKF0	Uncharacterized protein OS=Capsicum annuum OX=4072 GN=T459_05516	7.516	Up	7.7588e-05	T459_05516	48.733	2.1903	4.8	0.202	0.206	0.286	1.689	1.894	1.633	chloroplast							IPR001480; IPR003609;	Bulb-type lectin domain; PAN/Apple domain;
A0A1U8FML3	Calmodulin-like protein 5 OS=Capsicum annuum OX=4072 GN=T459_19078	1.749	Up	0.000183818	T459_19078	25.644	2.2309	5.3	0.729	0.681	0.762	1.254	1.33	1.214	chloroplast			GO:0043169 cation binding; GO:0046872 metal ion binding; GO:0005509 calcium ion binding; GO:0005488 binding; GO:0043167 ion binding;				IPR011992; IPR002048;	EF-hand domain pair; EF-hand domain;
A0A1U8FR15	16.6 kDa heat shock protein OS=Capsicum annuum OX=4072 GN=T459_07099	9.158	Up	3.9679e-06	T459_07099	16.353	10.64	12.1	0.196	0.217	0.169	1.751	1.849	1.73	cytoplasm				K13993	HSP20; HSP20 family protein	sly04141 Protein processing in endoplasmic reticulum - Solanum lycopersicum (tomato);	IPR002068; IPR008978;	Alpha crystallin/Hsp20 domain; HSP20-like chaperone;
A0A1U8FT28	Putative WRKY transcription factor 24 OS=Capsicum annuum OX=4072 GN=T459_07177	1.987	Up	4.0628e-07	T459_07177	18.636	1.8846	6.9	0.668	0.673	0.658	1.353	1.302	1.317	nucleus	GO:0050794 regulation of cellular process; GO:0010468 regulation of gene expression; GO:0006355 regulation of transcription, DNA-templated; GO:0031326 regulation of cellular biosynthetic process; GO:0080090 regulation of primary metabolic process; GO:0060255 regulation of macromolecule metabolic process; GO:0019219 regulation of nucleobase-containing compound metabolic process; GO:0010556 regulat…		GO:0097159 organic cyclic compound binding; GO:1901363 heterocyclic compound binding; GO:0003677 DNA binding; GO:0005488 binding; GO:0001071 nucleic acid binding transcription factor activity; GO:0003676 nucleic acid binding; GO:0043565 sequence-specific DNA binding; GO:0003700 transcription factor activity, sequence-specific DNA binding;				IPR003657;	WRKY domain;
A0A1U8FTF7	17.4 kDa class III heat shock protein OS=Capsicum annuum OX=4072 GN=T459_11007	3.754	Up	3.2023e-07	T459_11007	16.549	6.2554	8.1	0.405	0.41	0.435	1.588	1.567	1.538	cytoplasm				K13993	HSP20; HSP20 family protein	sly04141 Protein processing in endoplasmic reticulum - Solanum lycopersicum (tomato);	IPR002068; IPR008978;	Alpha crystallin/Hsp20 domain; HSP20-like chaperone;
A0A1U8FTW0	ESCRT-related protein CHMP1 OS=Capsicum annuum OX=4072 GN=T459_34486	1.868	Up	0.00100083	T459_34486	22.73	20.719	15.8	0.673	0.789	0.62	1.249	1.316	1.325	nucleus	GO:0006810 transport; GO:0051179 localization; GO:0007034 vacuolar transport; GO:0051234 establishment of localization;			K12197	CHMP1; charged multivesicular body protein 1	sly04144 Endocytosis - Solanum lycopersicum (tomato);
A0A1U8FUA5	Vesicle-associated protein 4-2 OS=Capsicum annuum OX=4072 GN=T459_05798	1.57	Up	0.00045896	T459_05798	30.514	16.868	15.9	0.72	0.789	0.82	1.263	1.207	1.186	nucleus							IPR008962; IPR000535;	PapD-like; Major sperm protein (MSP) domain;
A0A1U8FUW3	Flotillin-like protein 2 OS=Capsicum annuum OX=4072 GN=T459_10573	0.625	Down	0.000122645	T459_10573	53.736	5.1763	6.4	1.231	1.198	1.28	0.751	0.813	0.755	cytoplasm				K07192			IPR001107;	Band 7 domain;
A0A1U8FV13	"Chaperone protein dnaJ 8, chloroplastic OS=Capsicum annuum OX=4072 GN=T459_10608"	2.252	Up	0.000123282	T459_10608	18.231	6.8211	6.8	0.588	0.659	0.589	1.492	1.324	1.318	chloroplast							IPR001623;	DnaJ domain;
A0A1U8FVD7	Acidic endochitinase Q OS=Capsicum annuum OX=4072 GN=T459_06173	1.847	Up	5.7521e-05	T459_06173	27.796	25.666	30	0.668	0.692	0.696	1.189	1.292	1.317	extracellular	GO:1901071 glucosamine-containing compound metabolic process; GO:0006030 chitin metabolic process; GO:0044036 cell wall macromolecule metabolic process; GO:0006026 aminoglycan catabolic process; GO:1901136 carbohydrate derivative catabolic process; GO:0006807 nitrogen compound metabolic process; GO:0006032 chitin catabolic process; GO:0005975 carbohydrate metabolic process; GO:0044238 primary met…		GO:0004553 hydrolase activity, hydrolyzing O-glycosyl compounds; GO:0016787 hydrolase activity; GO:0004568 chitinase activity; GO:0003824 catalytic activity; GO:0016798 hydrolase activity, acting on glycosyl bonds;	K20547	CHIB; basic endochitinase B [EC:3.2.1.14]	sly04016 MAPK signaling pathway - plant - Solanum lycopersicum (tomato); sly01100 Metabolic pathways - Solanum lycopersicum (tomato); sly00520 Amino sugar and nucleotide sugar metabolism - Solanum lycopersicum (tomato);	IPR023346; IPR000726;	Lysozyme-like domain; Glycoside hydrolase, family 19, catalytic;
A0A1U8FVS2	Uncharacterized protein OS=Capsicum annuum OX=4072 GN=T459_05596	2.173	Up	0.00041868	T459_05596	38.402	30.069	14.2	0.647	0.554	0.673	1.462	1.34	1.271	cytoskeleton	GO:0006457 protein folding; GO:0009987 cellular process;		GO:0005515 protein binding; GO:0051082 unfolded protein binding; GO:0005488 binding;	K09510			IPR008971; IPR002939; IPR001623;	HSP40/DnaJ peptide-binding; Chaperone DnaJ, C-terminal; DnaJ domain;
A0A1U8FVW2	Heat shock 70 kDa protein OS=Capsicum annuum OX=4072 GN=T459_10610	3.756	Up	1.54834e-05	T459_10610	71.558	68.426	37.1	0.389	0.411	0.458	1.589	1.546	1.59	cytoplasm				K03283	HSPA1s; heat shock 70kDa protein 1/2/6/8	sly03040 Spliceosome - Solanum lycopersicum (tomato); sly04144 Endocytosis - Solanum lycopersicum (tomato); sly04141 Protein processing in endoplasmic reticulum - Solanum lycopersicum (tomato);	IPR029048; IPR029047;	Heat shock protein 70kD, C-terminal domain; Heat shock protein 70kD, peptide-binding domain;
A0A1U8FWD5	Putative NAD(P)H dehydrogenase (Quinone) FQR1-like 1 OS=Capsicum annuum OX=4072 GN=T459_05740	1.719	Up	0.0124045	T459_05740	21.674	4.538	30	0.898	0.62	0.679	1.169	1.19	1.418	cytoplasm			GO:0016651 oxidoreductase activity, acting on NAD(P)H; GO:1901265 nucleoside phosphate binding; GO:0003955 NAD(P)H dehydrogenase (quinone) activity; GO:0043167 ion binding; GO:0000166 nucleotide binding; GO:0048037 cofactor binding; GO:0016655 oxidoreductase activity, acting on NAD(P)H, quinone or similar compound as acceptor; GO:0016491 oxidoreductase activity; GO:1901363 heterocyclic compound b…	K03809	wrbA; NAD(P)H dehydrogenase (quinone) [EC:1.6.5.2]	sly01110 Biosynthesis of secondary metabolites - Solanum lycopersicum (tomato); sly00130 Ubiquinone and other terpenoid-quinone biosynthesis - Solanum lycopersicum (tomato);	IPR005025; IPR008254; IPR029039;	NADPH-dependent FMN reductase-like; Flavodoxin/nitric oxide synthase; Flavoprotein-like domain;
A0A1U8FWG6	Uncharacterized protein OS=Capsicum annuum OX=4072 GN=T459_05722	2.13	Up	2.4888e-05	T459_05722	32.394	2.1467	8.7	0.61	0.616	0.681	1.361	1.335	1.365	nucleus			GO:0003824 catalytic activity;				IPR013785;	Aldolase-type TIM barrel;
A0A1U8FWJ8	Uncharacterized protein OS=Capsicum annuum OX=4072 GN=T459_10720	1.529	Up	0.00021793	T459_10720	18.639	1.6772	5.5	0.783	0.77	0.812	1.243	1.237	1.136	nucleus			GO:0005515 protein binding; GO:0005488 binding;				IPR000008;	C2 domain;
A0A1U8FWZ5	Putative indole-3-acetic acid-amido synthetase GH3.8 OS=Capsicum annuum OX=4072 GN=T459_06630	4.989	Up	3.6003e-06	T459_06630	67.709	3.2652	3.5	0.298	0.347	0.345	1.586	1.691	1.662	nucleus				K14487	GH3; auxin responsive GH3 gene family	sly04075 Plant hormone signal transduction - Solanum lycopersicum (tomato);
A0A1U8G1E3	Glycerophosphodiester phosphodiesterase GDPD2 OS=Capsicum annuum OX=4072 GN=T459_07201	2.767	Up	2.4846e-07	T459_07201	42.766	1.6387	3.7	0.515	0.522	0.544	1.472	1.456	1.446	cytoplasm	GO:0044699 single-organism process; GO:0008152 metabolic process; GO:0044238 primary metabolic process; GO:0044710 single-organism metabolic process; GO:0006629 lipid metabolic process; GO:0071704 organic substance metabolic process;		GO:0008081 phosphoric diester hydrolase activity; GO:0016787 hydrolase activity; GO:0003824 catalytic activity; GO:0042578 phosphoric ester hydrolase activity; GO:0016788 hydrolase activity, acting on ester bonds;	K18696	GDE1; glycerophosphodiester phosphodiesterase [EC:3.1.4.46]	sly00564 Glycerophospholipid metabolism - Solanum lycopersicum (tomato);	IPR030395; IPR017946;	Glycerophosphodiester phosphodiesterase domain; PLC-like phosphodiesterase, TIM beta/alpha-barrel domain;
A0A1U8G4S0	Uncharacterized protein OS=Capsicum annuum OX=4072 GN=T459_10117	6.576	Up	3.3925e-07	T459_10117	94.566	130.55	20.6	0.241	0.269	0.264	1.703	1.712	1.675	chloroplast			GO:0043169 cation binding; GO:0046872 metal ion binding; GO:0005515 protein binding; GO:0008270 zinc ion binding; GO:0046914 transition metal ion binding; GO:0005488 binding; GO:0043167 ion binding;	K17987			IPR000270; IPR032350; IPR000433; IPR009060;	PB1 domain; Next to BRCA1, central domain; Zinc finger, ZZ-type; UBA-like;
A0A1U8G5J6	Chaperone protein ClpB1 OS=Capsicum annuum OX=4072 GN=T459_10363	3.116	Up	1.1515e-06	T459_10363	101.07	138.55	32.7	0.491	0.481	0.454	1.526	1.471	1.446	cytoplasm	GO:0008152 metabolic process; GO:0019538 protein metabolic process; GO:0043170 macromolecule metabolic process; GO:0044238 primary metabolic process; GO:0071704 organic substance metabolic process;		GO:0005524 ATP binding; GO:1901265 nucleoside phosphate binding; GO:0001882 nucleoside binding; GO:0043167 ion binding; GO:0000166 nucleotide binding; GO:0097159 organic cyclic compound binding; GO:1901363 heterocyclic compound binding; GO:0032549 ribonucleoside binding; GO:0097367 carbohydrate derivative binding; GO:0032553 ribonucleotide binding; GO:0005488 binding; GO:0032550 purine ribonucleo…	K03695			IPR019489; IPR003593; IPR003959; IPR027417; IPR004176;	Clp ATPase, C-terminal; AAA+ ATPase domain; ATPase, AAA-type, core; P-loop containing nucleoside triphosphate hydrolase; Clp, N-terminal;
A0A1U8GCS8	Sugar transport protein 13 OS=Capsicum annuum OX=4072 GN=T459_08093	1.797	Up	0.00024137	T459_08093	57.61	5.7625	3.2	0.693	0.771	0.674	1.305	1.221	1.316	vacuolar membrane	GO:0006810 transport; GO:0055085 transmembrane transport; GO:0051179 localization; GO:0051234 establishment of localization;	GO:0031224 intrinsic component of membrane; GO:0016020 membrane; GO:0016021 integral component of membrane; GO:0044425 membrane part;	GO:0022892 substrate-specific transporter activity; GO:0022891 substrate-specific transmembrane transporter activity; GO:0005215 transporter activity; GO:0022857 transmembrane transporter activity;				IPR020846;	Major facilitator superfamily domain;
A0A1U8GCU8	B2 protein OS=Capsicum annuum OX=4072 GN=T459_00105	4.929	Up	1.0915e-06	T459_00105	36.712	4.3097	7.9	0.341	0.333	0.328	1.764	1.552	1.623	nucleus							IPR013989;	Development/cell death domain;
A0A1U8GDG4	Bet1-like protein OS=Capsicum annuum OX=4072 GN=T459_12740	1.623	Up	0.0006158	T459_12740	15.052	1.9583	8.3	0.793	0.693	0.792	1.261	1.257	1.18	Golgi apparatus			GO:0005515 protein binding; GO:0005488 binding;	K08505	SFT1; protein transport protein SFT1	sly04130 SNARE interactions in vesicular transport - Solanum lycopersicum (tomato);	IPR000727;	Target SNARE coiled-coil homology domain;
A0A1U8GE37	Vacuolar protein sorting-associated protein 45-like protein OS=Capsicum annuum OX=4072 GN=T459_12319	1.525	Up	0.0030833	T459_12319	65.025	3.1891	3.7	0.706	0.866	0.8	1.279	1.169	1.17	cytoplasm	GO:0006904 vesicle docking involved in exocytosis; GO:0016192 vesicle-mediated transport; GO:0044763 single-organism cellular process; GO:0044699 single-organism process; GO:0048278 vesicle docking; GO:0022406 membrane docking; GO:0051234 establishment of localization; GO:0006810 transport; GO:1902578 single-organism localization; GO:0032940 secretion by cell; GO:0051179 localization; GO:0009987 …			K12479	VPS45; vacuolar protein sorting-associated protein 45	sly04144 Endocytosis - Solanum lycopersicum (tomato);	IPR027482;	Sec1-like, domain 2;
A0A1U8GEH7	Pathogenesis-related protein STH-21 OS=Capsicum annuum OX=4072 GN=T459_07754	2.746	Up	3.5742e-07	T459_07754	17.371	109.09	61	0.542	0.515	0.539	1.458	1.486	1.438	cytoplasm	GO:0006952 defense response; GO:0050896 response to stimulus; GO:0006950 response to stress; GO:0009607 response to biotic stimulus;						IPR023393; IPR000916;	START-like domain; Bet v I/Major latex protein;
A0A1U8GEQ9	Glutathione S-transferase U9 OS=Capsicum annuum OX=4072 GN=T459_07904	1.83	Up	3.4636e-06	T459_07904	25.931	21.972	24	0.699	0.741	0.703	1.294	1.325	1.303	cytoplasm			GO:0005515 protein binding; GO:0005488 binding;	K00799	GST; glutathione S-transferase [EC:2.5.1.18]	sly00480 Glutathione metabolism - Solanum lycopersicum (tomato);	IPR010987; IPR004045; IPR012336;	Glutathione S-transferase, C-terminal-like; Glutathione S-transferase, N-terminal; Thioredoxin-like fold;
A0A1U8GEV5	Uncharacterized protein OS=Capsicum annuum OX=4072 GN=T459_07888	1.559	Up	1.90601e-05	T459_07888	37.454	17.52	12.6	0.779	0.803	0.788	1.192	1.248	1.255	nucleus			GO:0005515 protein binding; GO:0005488 binding;				IPR000008;	C2 domain;
A0A1U8GHW7	Haloacid dehalogenase-like hydrolase domain-containing protein Sgpp OS=Capsicum annuum OX=4072 GN=T459_00764	3.199	Up	3.0171e-06	T459_00764	28.127	9.6858	23.1	0.496	0.466	0.442	1.508	1.532	1.452	endoplasmic reticulum	GO:0008152 metabolic process;		GO:0016787 hydrolase activity; GO:0003824 catalytic activity;				IPR023214;	HAD-like domain;
A0A1U8GIP3	Beta-amylase OS=Capsicum annuum OX=4072 GN=T459_00795	2.584	Up	0.00067577	T459_00795	60.868	3.5792	5.3	0.457	0.576	0.631	1.517	1.386	1.397	nucleus	GO:1901575 organic substance catabolic process; GO:0008152 metabolic process; GO:0005976 polysaccharide metabolic process; GO:0009057 macromolecule catabolic process; GO:0043170 macromolecule metabolic process; GO:0000272 polysaccharide catabolic process; GO:0044238 primary metabolic process; GO:0005975 carbohydrate metabolic process; GO:0009056 catabolic process; GO:0016052 carbohydrate cataboli…		GO:0004553 hydrolase activity, hydrolyzing O-glycosyl compounds; GO:0016787 hydrolase activity; GO:0016160 amylase activity; GO:0016161 beta-amylase activity; GO:0003824 catalytic activity; GO:0016798 hydrolase activity, acting on glycosyl bonds;	K01177	E3.2.1.2; beta-amylase [EC:3.2.1.2]	sly00500 Starch and sucrose metabolism - Solanum lycopersicum (tomato);	IPR017853; IPR013781;	Glycoside hydrolase superfamily; Glycoside hydrolase, catalytic domain;
A0A1U8GLK8	"15.7 kDa heat shock protein, peroxisomal OS=Capsicum annuum OX=4072 GN=T459_13779"	2.288	Up	4.6111e-06	T459_13779	16.335	11.709	36.7	0.614	0.575	0.595	1.365	1.41	1.306	cytoplasm				K13993	HSP20; HSP20 family protein	sly04141 Protein processing in endoplasmic reticulum - Solanum lycopersicum (tomato);	IPR002068; IPR008978;	Alpha crystallin/Hsp20 domain; HSP20-like chaperone;
A0A1U8GLV8	Heat shock cognate 70 kDa protein OS=Capsicum annuum OX=4072 GN=T459_13912	3.039	Up	2.2944e-08	T459_13912	71.354	127.15	53.5	0.483	0.488	0.499	1.501	1.485	1.482	cytoplasm				K03283	HSPA1s; heat shock 70kDa protein 1/2/6/8	sly03040 Spliceosome - Solanum lycopersicum (tomato); sly04144 Endocytosis - Solanum lycopersicum (tomato); sly04141 Protein processing in endoplasmic reticulum - Solanum lycopersicum (tomato);	IPR029048; IPR029047;	Heat shock protein 70kD, C-terminal domain; Heat shock protein 70kD, peptide-binding domain;
A0A1U8GP32	Bax inhibitor 1 OS=Capsicum annuum OX=4072 GN=T459_00713	2.922	Up	5.7609e-05	T459_00713	27.565	2.6844	6	0.493	0.461	0.563	1.471	1.505	1.456	plasma membrane				K21889
A0A1U8GQ71	Zinc finger CCCH domain-containing protein 47 OS=Capsicum annuum OX=4072 GN=T459_15066	3.275	Up	3.0269e-06	T459_15066	75.715	22.091	3.9	0.432	0.478	0.482	1.518	1.485	1.556	nucleus			GO:0046872 metal ion binding; GO:0043169 cation binding; GO:0005515 protein binding; GO:0005488 binding; GO:0043167 ion binding;				IPR000571; IPR020683;	Zinc finger, CCCH-type; Ankyrin repeat-containing domain;
A0A1U8GR46	ALA-interacting subunit OS=Capsicum annuum OX=4072 GN=T459_15475	1.592	Up	0.000138983	T459_15475	39.195	3.329	4.9	0.771	0.731	0.804	1.224	1.26	1.187	plasma membrane		GO:0016020 membrane;
A0A1U8GUR2	Uncharacterized protein OS=Capsicum annuum OX=4072 GN=T459_17189	2.795	Up	1.2244e-06	T459_17189	13.02	57.17	43.3	0.545	0.511	0.519	1.466	1.512	1.424	vacuolar membrane							IPR010259;	Peptidase S8 propeptide/proteinase inhibitor I9;
A0A1U8H027	Chaperone protein dnaJ 3 OS=Capsicum annuum OX=4072 GN=T459_15525	2.452	Up	1.3116e-06	T459_15525	46.582	83.097	24.8	0.59	0.552	0.584	1.423	1.427	1.382	nucleus	GO:0006457 protein folding; GO:0050896 response to stimulus; GO:0006950 response to stress; GO:0009987 cellular process; GO:0009408 response to heat; GO:0009628 response to abiotic stimulus; GO:0009266 response to temperature stimulus;		GO:0005524 ATP binding; GO:0031072 heat shock protein binding; GO:1901265 nucleoside phosphate binding; GO:0001882 nucleoside binding; GO:0043167 ion binding; GO:0005515 protein binding; GO:0000166 nucleotide binding; GO:0097159 organic cyclic compound binding; GO:1901363 heterocyclic compound binding; GO:0032549 ribonucleoside binding; GO:0097367 carbohydrate derivative binding; GO:0032553 ribon…	K09503	DNAJA2; DnaJ homolog subfamily A member 2	sly04141 Protein processing in endoplasmic reticulum - Solanum lycopersicum (tomato);	IPR008971; IPR002939; IPR001623; IPR001305;	HSP40/DnaJ peptide-binding; Chaperone DnaJ, C-terminal; DnaJ domain; Heat shock protein DnaJ, cysteine-rich domain;
A0A1U8H0F1	Glycerol-3-phosphate acyltransferase 5 OS=Capsicum annuum OX=4072 GN=T459_13869	2.083	Up	0.00026256	T459_13869	55.181	5.101	7.7	0.629	0.702	0.608	1.389	1.236	1.414	plasma membrane	GO:0008152 metabolic process;		GO:0016746 transferase activity, transferring acyl groups; GO:0003824 catalytic activity; GO:0016740 transferase activity;	K13508	GPAT; glycerol-3-phosphate acyltransferase [EC:2.3.1.15 2.3.1.198]	sly01110 Biosynthesis of secondary metabolites - Solanum lycopersicum (tomato); sly00564 Glycerophospholipid metabolism - Solanum lycopersicum (tomato); sly00561 Glycerolipid metabolism - Solanum lycopersicum (tomato); sly01100 Metabolic pathways - Solanum lycopersicum (tomato);	IPR002123;	Phospholipid/glycerol acyltransferase;
A0A1U8H364	Exocyst subunit Exo70 family protein OS=Capsicum annuum OX=4072 GN=T459_18215	1.988	Up	1.90942e-05	T459_18215	68.339	7.8578	7.4	0.689	0.634	0.674	1.336	1.348	1.286	chloroplast	GO:0006810 transport; GO:1902578 single-organism localization; GO:0032940 secretion by cell; GO:0016192 vesicle-mediated transport; GO:0044763 single-organism cellular process; GO:0044699 single-organism process; GO:0051179 localization; GO:0009987 cellular process; GO:0051234 establishment of localization; GO:0006887 exocytosis; GO:0044765 single-organism transport; GO:0046903 secretion;	GO:0005938 cell cortex; GO:0044464 cell part; GO:0044448 cell cortex part; GO:0005622 intracellular; GO:0071944 cell periphery; GO:0005737 cytoplasm; GO:0099568 cytoplasmic region; GO:0032991 macromolecular complex; GO:0044424 intracellular part; GO:0000145 exocyst; GO:0043234 protein complex; GO:0005623 cell; GO:0044444 cytoplasmic part; GO:0099023 tethering complex;		K07195			IPR016159;	Cullin repeat-like-containing domain;
A0A1U8H9G0	Uncharacterized protein OS=Capsicum annuum OX=4072 GN=T459_18290	1.869	Up	0.00034415	T459_18290	17.776	-2	31.2	0.705	0.632	0.742	1.254	1.371	1.261	cytoplasm				K13993	HSP20; HSP20 family protein	sly04141 Protein processing in endoplasmic reticulum - Solanum lycopersicum (tomato);	IPR002068; IPR008978;	Alpha crystallin/Hsp20 domain; HSP20-like chaperone;
A0A1U8HBF0	Uncharacterized protein OS=Capsicum annuum OX=4072 GN=T459_18291	2.127	Up	0.00040234	T459_18291	17.765	28.382	48.7	0.578	0.707	0.626	1.371	1.261	1.433	cytoplasm				K13993	HSP20; HSP20 family protein	sly04141 Protein processing in endoplasmic reticulum - Solanum lycopersicum (tomato);	IPR002068; IPR008978;	Alpha crystallin/Hsp20 domain; HSP20-like chaperone;
A0A1U8HE01	Uncharacterized protein OS=Capsicum annuum OX=4072 GN=T459_21299	2.13	Up	6.4332e-05	T459_21299	19.707	32.259	23.3	0.633	0.607	0.689	1.396	1.305	1.407	extracellular			GO:0005515 protein binding; GO:0005488 binding;				IPR000008;	C2 domain;
A0A1U8HF83	Uncharacterized protein OS=Capsicum annuum OX=4072 GN=T459_01954	2.216	Up	0.00043597	T459_01954	33.337	2.7864	3.4	0.541	0.678	0.638	1.376	1.294	1.446	nucleus							IPR007679; IPR008999;	Domain of unknown function DUF569; Actin cross-linking;
A0A1U8HFR8	Vetispiradiene synthase 1 OS=Capsicum annuum OX=4072 GN=T459_33611	6.712	Up	1.67142e-05	T459_33611	64.165	1.172	1.6	0.228	0.266	0.273	1.716	1.858	1.574	cytoskeleton	GO:0008152 metabolic process;		GO:0000287 magnesium ion binding; GO:0003824 catalytic activity; GO:0010333 terpene synthase activity; GO:0005488 binding; GO:0043167 ion binding; GO:0046872 metal ion binding; GO:0043169 cation binding; GO:0016829 lyase activity; GO:0016838 carbon-oxygen lyase activity, acting on phosphates; GO:0016835 carbon-oxygen lyase activity;	K14182	HVS; vetispiradiene synthase [EC:4.2.3.21]	sly01110 Biosynthesis of secondary metabolites - Solanum lycopersicum (tomato); sly00909 Sesquiterpenoid and triterpenoid biosynthesis - Solanum lycopersicum (tomato);	IPR005630; IPR008949; IPR008930; IPR001906;	Terpene synthase, metal-binding domain; Isoprenoid synthase domain; Terpenoid cyclases/protein prenyltransferase alpha-alpha toroid; Terpene synthase, N-terminal domain;
A0A1U8HH85	Uncharacterized protein OS=Capsicum annuum OX=4072 GN=T459_18958	3.367	Up	1.5364e-05	T459_18958	17.636	3.4893	6.4	0.416	0.466	0.479	1.505	1.561	1.517	nucleus
A0A1U8HJE1	Chitin-inducible gibberellin-responsive protein 1 OS=Capsicum annuum OX=4072 GN=T459_20716	2.023	Up	0.00090235	T459_20716	64.569	3.4935	5.3	0.737	0.578	0.659	1.43	1.308	1.255	chloroplast							IPR005202;	Transcription factor GRAS;
A0A2G2XJD9	Uncharacterized protein OS=Capsicum annuum OX=4072 GN=T459_35401	0.349	Down	6.0642e-05	T459_35401	9.9915	11.889	55.7	1.453	1.498	1.543	0.577	0.519	0.473	cytoplasm	GO:0006952 defense response; GO:0050896 response to stimulus; GO:0006950 response to stress;						IPR003614;	Knottin, scorpion toxin-like;
A0A2G2XVZ4	Uncharacterized protein OS=Capsicum annuum OX=4072 GN=T459_34475	9.24	Up	1.2127e-07	T459_34475	29.886	11.65	4.3	0.19	0.184	0.204	1.809	1.762	1.77	nucleus			GO:0005515 protein binding; GO:0005488 binding;				IPR000008;	C2 domain;
A0A2G2XWY7	Putative calcium-binding protein CML19 OS=Capsicum annuum OX=4072 GN=T459_34143	3.38	Up	6.1388e-05	T459_34143	21.92	2.4957	12.1	0.398	0.471	0.487	1.453	1.617	1.513	nucleus			GO:0043169 cation binding; GO:0046872 metal ion binding; GO:0005509 calcium ion binding; GO:0005488 binding; GO:0043167 ion binding;	K13448	CML; calcium-binding protein CML	sly04626 Plant-pathogen interaction - Solanum lycopersicum (tomato);	IPR011992; IPR002048;	EF-hand domain pair; EF-hand domain;
A0A2G2XX20	Luminal-binding protein 5 OS=Capsicum annuum OX=4072 GN=T459_34102	4.036	Up	1.1912e-08	T459_34102	74.329	4.6855	9.8	0.398	0.394	0.387	1.581	1.609	1.569	endoplasmic reticulum				K09490	HSPA5; heat shock 70kDa protein 5	sly03060 Protein export - Solanum lycopersicum (tomato); sly04141 Protein processing in endoplasmic reticulum - Solanum lycopersicum (tomato);	IPR029048; IPR029047;	Heat shock protein 70kD, C-terminal domain; Heat shock protein 70kD, peptide-binding domain;
A0A2G2XY67	Scarecrow-like protein 14 OS=Capsicum annuum OX=4072 GN=T459_33675	4.357	Up	4.9893e-08	T459_33675	77.705	9.4525	8.2	0.376	0.36	0.372	1.626	1.626	1.576	nucleus							IPR005202;	Transcription factor GRAS;
A0A2G2XYP7	Uncharacterized protein OS=Capsicum annuum OX=4072 GN=T459_33522	1.589	Up	3.5642e-05	T459_33522	27.54	17.654	17.9	0.759	0.794	0.761	1.246	1.246	1.185	nucleus			GO:0005515 protein binding; GO:0005488 binding;				IPR000008;	C2 domain;
A0A2G2XZ73	Uncharacterized protein OS=Capsicum annuum OX=4072 GN=T459_33369	0.627	Down	0.0110596	T459_33369	24.556	19.444	6.7	1.239	1.242	1.231	0.836	0.705	0.785	cytoplasm
A0A2G2Y0Q2	Carbonic anhydrase OS=Capsicum annuum OX=4072 GN=T459_32834	0.638	Down	3.6169e-05	T459_32834	28.561	75.925	49.8	1.175	1.251	1.217	0.762	0.793	0.77	cytoplasm	GO:0015976 carbon utilization; GO:0044699 single-organism process;		GO:0046914 transition metal ion binding; GO:0003824 catalytic activity; GO:0005488 binding; GO:0043167 ion binding; GO:0016829 lyase activity; GO:0046872 metal ion binding; GO:0043169 cation binding; GO:0016836 hydro-lyase activity; GO:0008270 zinc ion binding; GO:0004089 carbonate dehydratase activity; GO:0016835 carbon-oxygen lyase activity;	K01673	cynT; carbonic anhydrase [EC:4.2.1.1]	sly00910 Nitrogen metabolism - Solanum lycopersicum (tomato);
A0A2G2Y186	Uncharacterized protein OS=Capsicum annuum OX=4072 GN=T459_32612	1.532	Up	6.4499e-05	T459_32612	27.78	21.795	22.4	0.791	0.775	0.797	1.16	1.201	1.258	plasma membrane			GO:0030234 enzyme regulator activity; GO:0030414 peptidase inhibitor activity; GO:0061134 peptidase regulator activity; GO:0061135 endopeptidase regulator activity; GO:0004857 enzyme inhibitor activity; GO:0098772 molecular function regulator; GO:0004866 endopeptidase inhibitor activity;				IPR011065;	Kunitz inhibitor ST1-like;
A0A2G2Y1C5	Uncharacterized protein OS=Capsicum annuum OX=4072 GN=T459_32615	1.81	Up	7.6016e-05	T459_32615	22.954	11.683	10.1	0.683	0.699	0.746	1.31	1.225	1.316	vacuolar membrane			GO:0030234 enzyme regulator activity; GO:0030414 peptidase inhibitor activity; GO:0061134 peptidase regulator activity; GO:0061135 endopeptidase regulator activity; GO:0004857 enzyme inhibitor activity; GO:0098772 molecular function regulator; GO:0004866 endopeptidase inhibitor activity;				IPR011065;	Kunitz inhibitor ST1-like;
A0A2G2Y306	"Bifunctional riboflavin biosynthesis protein RIBA 1, chloroplastic OS=Capsicum annuum OX=4072 GN=T459_32000"	1.721	Up	0.00193638	T459_32000	59.281	5.1521	3.9	0.672	0.707	0.819	1.197	1.206	1.38	chloroplast	GO:0009110 vitamin biosynthetic process; GO:0018130 heterocycle biosynthetic process; GO:0044711 single-organism biosynthetic process; GO:0009231 riboflavin biosynthetic process; GO:0044281 small molecule metabolic process; GO:0044763 single-organism cellular process; GO:0044699 single-organism process; GO:1901360 organic cyclic compound metabolic process; GO:0006807 nitrogen compound metabolic p…		GO:0016814 hydrolase activity, acting on carbon-nitrogen (but not peptide) bonds, in cyclic amidines; GO:0003935 GTP cyclohydrolase II activity; GO:0003824 catalytic activity; GO:0016830 carbon-carbon lyase activity; GO:0008686 3,4-dihydroxy-2-butanone-4-phosphate synthase activity; GO:0016829 lyase activity; GO:0016787 hydrolase activity; GO:0019238 cyclohydrolase activity; GO:0003933 GTP cycloh…	K14652	ribBA; 3,4-dihydroxy 2-butanone 4-phosphate synthase / GTP cyclohydrolase II [EC:4.1.99.12 3.5.4.25]	sly01110 Biosynthesis of secondary metabolites - Solanum lycopersicum (tomato); sly00790 Folate biosynthesis - Solanum lycopersicum (tomato); sly01100 Metabolic pathways - Solanum lycopersicum (tomato); sly00740 Riboflavin metabolism - Solanum lycopersicum (tomato);	IPR017945; IPR032677;	DHBP synthase RibB-like alpha/beta domain; GTP cyclohydrolase II;
A0A2G2Y3H9	5-epiaristolochene synthase OS=Capsicum annuum OX=4072 GN=T459_31829	6.415	Up	4.3875e-07	T459_31829	65.054	72.867	23.3	0.271	0.254	0.273	1.658	1.804	1.657	cytoskeleton	GO:0008152 metabolic process;		GO:0000287 magnesium ion binding; GO:0003824 catalytic activity; GO:0010333 terpene synthase activity; GO:0005488 binding; GO:0043167 ion binding; GO:0046872 metal ion binding; GO:0043169 cation binding; GO:0016829 lyase activity; GO:0016838 carbon-oxygen lyase activity, acting on phosphates; GO:0016835 carbon-oxygen lyase activity;	K15804			IPR005630; IPR008949; IPR008930; IPR001906;	Terpene synthase, metal-binding domain; Isoprenoid synthase domain; Terpenoid cyclases/protein prenyltransferase alpha-alpha toroid; Terpene synthase, N-terminal domain;
A0A2G2Y3L4	NAC domain-containing protein 53 OS=Capsicum annuum OX=4072 GN=T459_31837	2.084	Up	3.9296e-05	T459_31837	57.668	1.9813	2.9	0.675	0.606	0.654	1.345	1.3	1.388	nucleus	GO:0050794 regulation of cellular process; GO:0010468 regulation of gene expression; GO:0006355 regulation of transcription, DNA-templated; GO:0031326 regulation of cellular biosynthetic process; GO:0080090 regulation of primary metabolic process; GO:0060255 regulation of macromolecule metabolic process; GO:0019219 regulation of nucleobase-containing compound metabolic process; GO:0010556 regulat…		GO:0097159 organic cyclic compound binding; GO:1901363 heterocyclic compound binding; GO:0003677 DNA binding; GO:0005488 binding; GO:0003676 nucleic acid binding;				IPR003441; IPR012337;	NAC domain; Ribonuclease H-like domain;
A0A2G2Y413	Uncharacterized protein OS=Capsicum annuum OX=4072 GN=T459_31660	1.743	Up	0.00046393	T459_31660	28.007	2.837	6.7	0.751	0.66	0.769	1.301	1.207	1.291	chloroplast							IPR024286; IPR029055;	Domain of unknown function DUF3700; Nucleophile aminohydrolases, N-terminal;
A0A2G2Y5Y1	Uncharacterized protein OS=Capsicum annuum OX=4072 GN=T459_29592	0.301	Down	0.00031816	T459_29592	15.525	-2	6.5	1.573	1.662	1.426	0.386	0.528	0.488	chloroplast				K12858	DDX23; ATP-dependent RNA helicase DDX23/PRP28 [EC:3.6.4.13]	sly03040 Spliceosome - Solanum lycopersicum (tomato);	IPR027417; IPR001650;	P-loop containing nucleoside triphosphate hydrolase; Helicase, C-terminal;
A0A2G2Y5Y4	Uncharacterized protein OS=Capsicum annuum OX=4072 GN=T459_29569	2.886	Up	0.000195154	T459_29569	16.536	2.9008	8.2	0.498	0.579	0.456	1.589	1.451	1.385	chloroplast
A0A2G2Y6P1	Uncharacterized protein OS=Capsicum annuum OX=4072 GN=T459_29807	1.879	Up	0.000135708	T459_29807	34.866	3.6167	6.9	0.672	0.68	0.725	1.392	1.23	1.28	cytoplasm			GO:0005515 protein binding; GO:0005488 binding;				IPR001810;	F-box domain;
A0A2G2Y703	Uncharacterized protein OS=Capsicum annuum OX=4072 GN=T459_29945	3.369	Up	8.4892e-05	T459_29945	72.675	14.85	10.8	0.512	0.398	0.448	1.588	1.521	1.466	cytoplasm			GO:0003824 catalytic activity;				IPR015424; IPR000192; IPR015421; IPR015422;	Pyridoxal phosphate-dependent transferase; Aminotransferase class V domain; Pyridoxal phosphate-dependent transferase, major region, subdomain 1; Pyridoxal phosphate-dependent transferase, major region, subdomain 2;
A0A2G2YBC0	Protein CER1-like 1 OS=Capsicum annuum OX=4072 GN=T459_31481	2.74	Up	0.00029629	T459_31481	71.993	5.8682	8.2	0.462	0.516	0.614	1.493	1.479	1.39	cytoplasm	GO:0044711 single-organism biosynthetic process; GO:0016053 organic acid biosynthetic process; GO:0055114 oxidation-reduction process; GO:0044281 small molecule metabolic process; GO:0044763 single-organism cellular process; GO:0044699 single-organism process; GO:0009058 biosynthetic process; GO:0044255 cellular lipid metabolic process; GO:0006631 fatty acid metabolic process; GO:0044238 primary …		GO:0005506 iron ion binding; GO:0046914 transition metal ion binding; GO:0003824 catalytic activity; GO:0005488 binding; GO:0043167 ion binding; GO:0046872 metal ion binding; GO:0043169 cation binding; GO:0016491 oxidoreductase activity;	K15404	CER1; aldehyde decarbonylase [EC:4.1.99.5]	sly01110 Biosynthesis of secondary metabolites - Solanum lycopersicum (tomato); sly00073 Cutin, suberine and wax biosynthesis - Solanum lycopersicum (tomato);	IPR006694; IPR021940;	Fatty acid hydroxylase; Uncharacterised domain Wax2, C-terminal;
A0A2G2YBY3	"Omega-6 fatty acid desaturase, endoplasmic reticulum OS=Capsicum annuum OX=4072 GN=T459_31486"	2.505	Up	1.4012e-06	T459_31486	44.315	11.415	11.4	0.572	0.575	0.552	1.441	1.453	1.362	plasma membrane	GO:0008152 metabolic process; GO:0055114 oxidation-reduction process; GO:0044710 single-organism metabolic process; GO:0044699 single-organism process; GO:0044238 primary metabolic process; GO:0071704 organic substance metabolic process; GO:0006629 lipid metabolic process;		GO:0016705 oxidoreductase activity, acting on paired donors, with incorporation or reduction of molecular oxygen; GO:0003824 catalytic activity; GO:0016717 oxidoreductase activity, acting on paired donors, with oxidation of a pair of donors resulting in the reduction of molecular oxygen to two molecules of water; GO:0016491 oxidoreductase activity;				IPR021863; IPR005804;	Fatty acid desaturase, N-terminal; Fatty acid desaturase domain;
A0A2G2YDB4	3-ketoacyl-CoA synthase OS=Capsicum annuum OX=4072 GN=T459_27221	0.516	Down	0.00031502	T459_27221	55.485	1.4801	1.6	1.3	1.353	1.331	0.613	0.707	0.737	chloroplast	GO:0044711 single-organism biosynthetic process; GO:0016053 organic acid biosynthetic process; GO:0044281 small molecule metabolic process; GO:0044763 single-organism cellular process; GO:0044699 single-organism process; GO:0044255 cellular lipid metabolic process; GO:0009058 biosynthetic process; GO:0006631 fatty acid metabolic process; GO:0044238 primary metabolic process; GO:0044237 cellular m…	GO:0016020 membrane;	GO:0016746 transferase activity, transferring acyl groups; GO:0016747 transferase activity, transferring acyl groups other than amino-acyl groups; GO:0003824 catalytic activity; GO:0016740 transferase activity;	K15397	KCS; 3-ketoacyl-CoA synthase [EC:2.3.1.199]	sly01110 Biosynthesis of secondary metabolites - Solanum lycopersicum (tomato); sly00062 Fatty acid elongation - Solanum lycopersicum (tomato); sly01100 Metabolic pathways - Solanum lycopersicum (tomato);	IPR016039; IPR013747; IPR013601;	Thiolase-like; 3-Oxoacyl-[acyl-carrier-protein (ACP)] synthase III, C-terminal; FAE1/Type III polyketide synthase-like protein;
A0A2G2YES5	REF/SRPP-like protein OS=Capsicum annuum OX=4072 GN=T459_27737	2.569	Up	0.00070475	T459_27737	24.343	2.8403	5.4	0.453	0.624	0.593	1.394	1.412	1.485	chloroplast
A0A2G2YG29	Putative mediator of RNA polymerase II transcription subunit 37c OS=Capsicum annuum OX=4072 GN=T459_28167	3.165	Up	1.4133e-07	T459_28167	71.253	323.31	57.9	0.474	0.487	0.463	1.504	1.524	1.479	cytoplasm				K03283	HSPA1s; heat shock 70kDa protein 1/2/6/8	sly03040 Spliceosome - Solanum lycopersicum (tomato); sly04144 Endocytosis - Solanum lycopersicum (tomato); sly04141 Protein processing in endoplasmic reticulum - Solanum lycopersicum (tomato);	IPR029048; IPR029047;	Heat shock protein 70kD, C-terminal domain; Heat shock protein 70kD, peptide-binding domain;
A0A2G2YGD8	"4,5-DOPA dioxygenase extradiol OS=Capsicum annuum OX=4072 GN=T459_28303"	5.683	Up	1.5661e-07	T459_28303	34.519	2.717	6.8	0.288	0.293	0.306	1.717	1.707	1.617	chloroplast	GO:0008152 metabolic process; GO:0006725 cellular aromatic compound metabolic process; GO:0055114 oxidation-reduction process; GO:0044710 single-organism metabolic process; GO:0044699 single-organism process; GO:0009987 cellular process; GO:0044237 cellular metabolic process;		GO:0005506 iron ion binding; GO:0016701 oxidoreductase activity, acting on single donors with incorporation of molecular oxygen; GO:0046914 transition metal ion binding; GO:0003824 catalytic activity; GO:0005488 binding; GO:0043167 ion binding; GO:0046872 metal ion binding; GO:0043169 cation binding; GO:0008270 zinc ion binding; GO:0008198 ferrous iron binding; GO:0016491 oxidoreductase activity;	K15777	DOPA; 4,5-DOPA dioxygenase extradiol [EC:1.13.11.-]	sly00965 Betalain biosynthesis - Solanum lycopersicum (tomato);	IPR004183;	Extradiol ring-cleavage dioxygenase, class III enzyme, subunit B;
A0A2G2YGS9	Indole-3-acetaldehyde oxidase OS=Capsicum annuum OX=4072 GN=T459_28443	1.832	Up	5.6424e-05	T459_28443	148.29	12.215	7.7	0.676	0.728	0.699	1.22	1.318	1.314	chloroplast	GO:0044699 single-organism process; GO:0008152 metabolic process; GO:0055114 oxidation-reduction process; GO:0044710 single-organism metabolic process;		GO:0051537 2 iron, 2 sulfur cluster binding; GO:1901265 nucleoside phosphate binding; GO:0005506 iron ion binding; GO:0050660 flavin adenine dinucleotide binding; GO:0043167 ion binding; GO:0000166 nucleotide binding; GO:0048037 cofactor binding; GO:0016491 oxidoreductase activity; GO:0016614 oxidoreductase activity, acting on CH-OH group of donors; GO:0009055 electron carrier activity; GO:190136…	K09842	AAO3; abscisic-aldehyde oxidase [EC:1.2.3.14]	sly01110 Biosynthesis of secondary metabolites - Solanum lycopersicum (tomato); sly00906 Carotenoid biosynthesis - Solanum lycopersicum (tomato); sly01100 Metabolic pathways - Solanum lycopersicum (tomato);	IPR001041; IPR002346; IPR012675; IPR016167; IPR002888; IPR016166; IPR005107; IPR016169; IPR000674; IPR008274;	2Fe-2S ferredoxin-type iron-sulfur binding domain; Molybdopterin dehydrogenase, FAD-binding; Beta-grasp domain; FAD-binding, type 2, subdomain 1; [2Fe-2S]-binding; FAD-binding, type 2; CO dehydrogenase flavoprotein, C-terminal; CO dehydrogenase flavoprotein-like, FAD-binding, subdomain 2; Aldehyde oxidase/xanthine dehydrogenase, a/b hammerhead; Aldehyde oxidase/xanthine dehydrogenase, molybdopter…
A0A2G2YH15	Chaperone protein dnaJ 3 OS=Capsicum annuum OX=4072 GN=T459_28486	6.559	Up	6.7841e-09	T459_28486	46.614	44.16	19.8	0.261	0.257	0.256	1.664	1.683	1.73	nucleus	GO:0006457 protein folding; GO:0050896 response to stimulus; GO:0006950 response to stress; GO:0009987 cellular process; GO:0009408 response to heat; GO:0009628 response to abiotic stimulus; GO:0009266 response to temperature stimulus;		GO:0005524 ATP binding; GO:0031072 heat shock protein binding; GO:1901265 nucleoside phosphate binding; GO:0001882 nucleoside binding; GO:0043167 ion binding; GO:0005515 protein binding; GO:0000166 nucleotide binding; GO:0097159 organic cyclic compound binding; GO:1901363 heterocyclic compound binding; GO:0032549 ribonucleoside binding; GO:0097367 carbohydrate derivative binding; GO:0032553 ribon…	K09503	DNAJA2; DnaJ homolog subfamily A member 2	sly04141 Protein processing in endoplasmic reticulum - Solanum lycopersicum (tomato);	IPR008971; IPR002939; IPR001623; IPR001305;	HSP40/DnaJ peptide-binding; Chaperone DnaJ, C-terminal; DnaJ domain; Heat shock protein DnaJ, cysteine-rich domain;
A0A2G2YM98	Putative glutathione S-transferase OS=Capsicum annuum OX=4072 GN=T459_25929	1.628	Up	1.78169e-05	T459_25929	25.021	32.483	27.7	0.778	0.757	0.732	1.212	1.249	1.23	chloroplast			GO:0005515 protein binding; GO:0005488 binding;	K00799	GST; glutathione S-transferase [EC:2.5.1.18]	sly00480 Glutathione metabolism - Solanum lycopersicum (tomato);	IPR010987; IPR004046; IPR004045; IPR012336;	Glutathione S-transferase, C-terminal-like; Glutathione S-transferase, C-terminal; Glutathione S-transferase, N-terminal; Thioredoxin-like fold;
A0A2G2YN50	Uncharacterized protein OS=Capsicum annuum OX=4072 GN=T459_26266	4.008	Up	0.000123369	T459_26266	25.999	29.714	14.5	0.396	0.332	0.458	1.645	1.579	1.529	chloroplast							IPR004864;	Late embryogenesis abundant protein, LEA-14;
A0A2G2YNA3	Uncharacterized protein OS=Capsicum annuum OX=4072 GN=T459_26279	1.563	Up	0.00170486	T459_26279	34.553	6.9925	15.6	0.695	0.806	0.84	1.215	1.185	1.258	peroxisome	GO:0045184 establishment of protein localization; GO:0006810 transport; GO:0046907 intracellular transport; GO:0070727 cellular macromolecule localization; GO:0051649 establishment of localization in cell; GO:0016192 vesicle-mediated transport; GO:0006886 intracellular protein transport; GO:0071702 organic substance transport; GO:0008104 protein localization; GO:0033036 macromolecule localization…	GO:0016020 membrane;	GO:0005484 SNAP receptor activity; GO:0005515 protein binding; GO:0005488 binding;	K08486	STX1B_2_3; syntaxin 1B/2/3	sly04130 SNARE interactions in vesicular transport - Solanum lycopersicum (tomato);	IPR000727; IPR010989; IPR006011;	Target SNARE coiled-coil homology domain; SNARE; Syntaxin, N-terminal domain;
A0A2G2YNP7	Uncharacterized protein OS=Capsicum annuum OX=4072 GN=T459_26419	1.657	Up	0.00022334	T459_26419	30.708	3.6684	3.5	0.785	0.711	0.755	1.296	1.179	1.255	cytoplasm			GO:0003824 catalytic activity; GO:0016491 oxidoreductase activity;				IPR016040;	NAD(P)-binding domain;
A0A2G2YNT2	Putative calcium-binding protein CML50 OS=Capsicum annuum OX=4072 GN=T459_26517	1.879	Up	1.53102e-05	T459_26517	30.419	6.7345	9.5	0.692	0.71	0.672	1.319	1.322	1.256	nucleus			GO:0043169 cation binding; GO:0046872 metal ion binding; GO:0005509 calcium ion binding; GO:0005488 binding; GO:0043167 ion binding;	K13448	CML; calcium-binding protein CML	sly04626 Plant-pathogen interaction - Solanum lycopersicum (tomato);	IPR011992; IPR002048;	EF-hand domain pair; EF-hand domain;
A0A2G2YQ21	Cell division cycle protein 48-like protein OS=Capsicum annuum OX=4072 GN=T459_22589	6.363	Up	3.6815e-07	T459_22589	90.01	14.888	33.2	0.254	0.282	0.263	1.673	1.662	1.749	cytoplasm			GO:0005524 ATP binding; GO:1901265 nucleoside phosphate binding; GO:0001882 nucleoside binding; GO:0043167 ion binding; GO:0016787 hydrolase activity; GO:0000166 nucleotide binding; GO:0097159 organic cyclic compound binding; GO:1901363 heterocyclic compound binding; GO:0032549 ribonucleoside binding; GO:0097367 carbohydrate derivative binding; GO:0003824 catalytic activity; GO:0032553 ribonucleo…	K13525	VCP; transitional endoplasmic reticulum ATPase	sly04141 Protein processing in endoplasmic reticulum - Solanum lycopersicum (tomato);	IPR029067; IPR003959; IPR003593; IPR009010; IPR004201; IPR027417; IPR003338;	CDC48 domain 2-like; ATPase, AAA-type, core; AAA+ ATPase domain; Aspartate decarboxylase-like domain; CDC48, domain 2; P-loop containing nucleoside triphosphate hydrolase; CDC48, N-terminal subdomain;
A0A2G2YQ27	Phenylalanine ammonia-lyase OS=Capsicum annuum OX=4072 GN=T459_22642	4.291	Up	3.8524e-08	T459_22642	78.308	43.435	17.4	0.361	0.38	0.374	1.591	1.605	1.588	chloroplast	GO:1902222 erythrose 4-phosphate/phosphoenolpyruvate family amino acid catabolic process; GO:1901606 alpha-amino acid catabolic process; GO:0006725 cellular aromatic compound metabolic process; GO:0044699 single-organism process; GO:0044237 cellular metabolic process; GO:0071704 organic substance metabolic process; GO:0006559 L-phenylalanine catabolic process; GO:0008152 metabolic process; GO:000…	GO:0044424 intracellular part; GO:0005623 cell; GO:0044464 cell part; GO:0005622 intracellular; GO:0005737 cytoplasm;	GO:0016829 lyase activity; GO:0016840 carbon-nitrogen lyase activity; GO:0016841 ammonia-lyase activity; GO:0003824 catalytic activity;	K10775	PAL; phenylalanine ammonia-lyase [EC:4.3.1.24]	sly01110 Biosynthesis of secondary metabolites - Solanum lycopersicum (tomato); sly00940 Phenylpropanoid biosynthesis - Solanum lycopersicum (tomato); sly01100 Metabolic pathways - Solanum lycopersicum (tomato); sly00360 Phenylalanine metabolism - Solanum lycopersicum (tomato);	IPR024083; IPR008948; IPR023144;	Fumarase/histidase, N-terminal; L-Aspartase-like; Phenylalanine ammonia-lyase, shielding domain;
A0A2G2YRI9	"Arogenate dehydrogenase 1, chloroplastic OS=Capsicum annuum OX=4072 GN=T459_23145"	2.856	Up	1.4056e-06	T459_23145	45.635	4.7578	5	0.51	0.533	0.502	1.493	1.411	1.509	chloroplast	GO:0006725 cellular aromatic compound metabolic process; GO:0016053 organic acid biosynthetic process; GO:0044699 single-organism process; GO:0009058 biosynthetic process; GO:1901566 organonitrogen compound biosynthetic process; GO:0044237 cellular metabolic process; GO:0071704 organic substance metabolic process; GO:0008152 metabolic process; GO:0006520 cellular amino acid metabolic process; GO:…		GO:0016627 oxidoreductase activity, acting on the CH-CH group of donors; GO:0008977 prephenate dehydrogenase (NAD+) activity; GO:0016628 oxidoreductase activity, acting on the CH-CH group of donors, NAD or NADP as acceptor; GO:0003824 catalytic activity; GO:0004665 prephenate dehydrogenase (NADP+) activity; GO:0016491 oxidoreductase activity;	K15227	TYRAAT; arogenate dehydrogenase (NADP+), plant [EC:1.3.1.78]	sly00400 Phenylalanine, tyrosine and tryptophan biosynthesis - Solanum lycopersicum (tomato); sly01110 Biosynthesis of secondary metabolites - Solanum lycopersicum (tomato); sly01230 Biosynthesis of amino acids - Solanum lycopersicum (tomato); sly01100 Metabolic pathways - Solanum lycopersicum (tomato);	IPR003099; IPR008927; IPR016040;	Prephenate dehydrogenase; 6-phosphogluconate dehydrogenase C-terminal domain-like; NAD(P)-binding domain;
A0A2G2YS35	Uncharacterized protein OS=Capsicum annuum OX=4072 GN=T459_23362	1.992	Up	0.00192406	T459_23362	32.378	2.2441	6	0.569	0.718	0.709	1.209	1.293	1.475	chloroplast				K22762			IPR008580;	PPPDE putative peptidase domain;
A0A2G2YUF1	Retinal dehydrogenase 1 OS=Capsicum annuum OX=4072 GN=T459_24183	2.003	Up	3.8333e-06	T459_24183	54.692	4.1686	6	0.651	0.655	0.683	1.354	1.281	1.349	cytoplasm	GO:0044699 single-organism process; GO:0008152 metabolic process; GO:0055114 oxidation-reduction process; GO:0044710 single-organism metabolic process;		GO:0016620 oxidoreductase activity, acting on the aldehyde or oxo group of donors, NAD or NADP as acceptor; GO:0003824 catalytic activity; GO:0016491 oxidoreductase activity; GO:0016903 oxidoreductase activity, acting on the aldehyde or oxo group of donors;	K12355	REF1; coniferyl-aldehyde dehydrogenase [EC:1.2.1.68]	sly00940 Phenylpropanoid biosynthesis - Solanum lycopersicum (tomato);	IPR016161; IPR015590; IPR016162; IPR016163;	Aldehyde/histidinol dehydrogenase; Aldehyde dehydrogenase domain; Aldehyde dehydrogenase N-terminal domain; Aldehyde dehydrogenase, C-terminal;
A0A2G2YVX0	Glutamate decarboxylase OS=Capsicum annuum OX=4072 GN=T459_21184	4.962	Up	1.6822e-07	T459_21184	59.504	6.9862	14.2	0.342	0.318	0.322	1.631	1.649	1.593	cytoplasm	GO:0009064 glutamine family amino acid metabolic process; GO:0043648 dicarboxylic acid metabolic process; GO:0044281 small molecule metabolic process; GO:0044763 single-organism cellular process; GO:0006807 nitrogen compound metabolic process; GO:0044699 single-organism process; GO:0044238 primary metabolic process; GO:1901605 alpha-amino acid metabolic process; GO:0044237 cellular metabolic proc…		GO:0097159 organic cyclic compound binding; GO:1901363 heterocyclic compound binding; GO:0004351 glutamate decarboxylase activity; GO:0003824 catalytic activity; GO:0005488 binding; GO:0016830 carbon-carbon lyase activity; GO:0043167 ion binding; GO:0016831 carboxy-lyase activity; GO:0016829 lyase activity; GO:0043168 anion binding; GO:0048037 cofactor binding; GO:0030170 pyridoxal phosphate bind…	K01580	E4.1.1.15; glutamate decarboxylase [EC:4.1.1.15]	sly00650 Butanoate metabolism - Solanum lycopersicum (tomato); sly00410 beta-Alanine metabolism - Solanum lycopersicum (tomato); sly00430 Taurine and hypotaurine metabolism - Solanum lycopersicum (tomato); sly01110 Biosynthesis of secondary metabolites - Solanum lycopersicum (tomato); sly00250 Alanine, aspartate and glutamate metabolism - Solanum lycopersicum (tomato); sly01100 Metabolic pathways…	IPR015424; IPR015421;	Pyridoxal phosphate-dependent transferase; Pyridoxal phosphate-dependent transferase, major region, subdomain 1;
A0A2G2YXE3	Glyoxysomal fatty acid beta-oxidation multifunctional protein MFP-a OS=Capsicum annuum OX=4072 GN=T459_21691	4.247	Up	0.00027878	T459_21691	101.81	3.4742	3.2	0.416	0.299	0.414	1.593	1.747	1.455	plasma membrane	GO:0055114 oxidation-reduction process; GO:0044281 small molecule metabolic process; GO:0044763 single-organism cellular process; GO:0044699 single-organism process; GO:0044255 cellular lipid metabolic process; GO:0006631 fatty acid metabolic process; GO:0044238 primary metabolic process; GO:0044237 cellular metabolic process; GO:0071704 organic substance metabolic process; GO:0008152 metabolic p…		GO:0016614 oxidoreductase activity, acting on CH-OH group of donors; GO:0016616 oxidoreductase activity, acting on the CH-OH group of donors, NAD or NADP as acceptor; GO:0003857 3-hydroxyacyl-CoA dehydrogenase activity; GO:0003824 catalytic activity; GO:0016491 oxidoreductase activity;	K10527	MFP2; enoyl-CoA hydratase/3-hydroxyacyl-CoA dehydrogenase [EC:4.2.1.17 1.1.1.35 1.1.1.211]	sly01110 Biosynthesis of secondary metabolites - Solanum lycopersicum (tomato); sly00592 alpha-Linolenic acid metabolism - Solanum lycopersicum (tomato); sly01212 Fatty acid metabolism - Solanum lycopersicum (tomato); sly01100 Metabolic pathways - Solanum lycopersicum (tomato); sly00071 Fatty acid degradation - Solanum lycopersicum (tomato);	IPR029045; IPR008927; IPR013328; IPR016040; IPR006176; IPR006108;	ClpP/crotonase-like domain; 6-phosphogluconate dehydrogenase C-terminal domain-like; 6-phosphogluconate dehydrogenase, domain 2; NAD(P)-binding domain; 3-hydroxyacyl-CoA dehydrogenase, NAD binding; 3-hydroxyacyl-CoA dehydrogenase, C-terminal;
A0A2G2YXY5	(+)-neomenthol dehydrogenase OS=Capsicum annuum OX=4072 GN=T459_21752	4.026	Up	7.4957e-07	T459_21752	34.757	35.362	24.5	0.413	0.374	0.393	1.623	1.564	1.564	nucleus				K15095	E1.1.1.208; (+)-neomenthol dehydrogenase [EC:1.1.1.208]	sly01110 Biosynthesis of secondary metabolites - Solanum lycopersicum (tomato); sly00902 Monoterpenoid biosynthesis - Solanum lycopersicum (tomato);	IPR016040;	NAD(P)-binding domain;
A0A2G2YY43	Glycerol-3-phosphate 2-O-acyltransferase 4 OS=Capsicum annuum OX=4072 GN=T459_21812	0.625	Down	0.00053958	T459_21812	51.031	8.8629	14.2	1.262	1.253	1.196	0.715	0.775	0.831	plasma membrane	GO:0008152 metabolic process;		GO:0016746 transferase activity, transferring acyl groups; GO:0003824 catalytic activity; GO:0016740 transferase activity;	K13508	GPAT; glycerol-3-phosphate acyltransferase [EC:2.3.1.15 2.3.1.198]	sly01110 Biosynthesis of secondary metabolites - Solanum lycopersicum (tomato); sly00564 Glycerophospholipid metabolism - Solanum lycopersicum (tomato); sly00561 Glycerolipid metabolism - Solanum lycopersicum (tomato); sly01100 Metabolic pathways - Solanum lycopersicum (tomato);	IPR002123; IPR023214;	Phospholipid/glycerol acyltransferase; HAD-like domain;
A0A2G2YZV4	Uncharacterized protein OS=Capsicum annuum OX=4072 GN=T459_18775	0.657	Down	1.65196e-05	T459_18775	9.9645	21.113	44.3	1.214	1.24	1.186	0.813	0.789	0.79	cytoplasm	GO:0006952 defense response; GO:0050896 response to stimulus; GO:0006950 response to stress;						IPR003614;	Knottin, scorpion toxin-like;
A0A2G2Z2X1	Uncharacterized protein OS=Capsicum annuum OX=4072 GN=T459_19845	2.281	Up	2.0802e-05	T459_19845	63.358	8.6368	13	0.573	0.617	0.629	1.435	1.329	1.385	nucleus	GO:0043632 modification-dependent macromolecule catabolic process; GO:0044265 cellular macromolecule catabolic process; GO:0051603 proteolysis involved in cellular protein catabolic process; GO:0044257 cellular protein catabolic process; GO:0019941 modification-dependent protein catabolic process; GO:0044267 cellular protein metabolic process; GO:0006511 ubiquitin-dependent protein catabolic proc…
A0A2G2Z3W4	Uncharacterized protein OS=Capsicum annuum OX=4072 GN=T459_20224	1.975	Up	4.9379e-06	T459_20224	37.215	22.841	10.4	0.682	0.676	0.648	1.342	1.348	1.272	cytoskeleton	GO:0006457 protein folding; GO:0009987 cellular process;		GO:0005515 protein binding; GO:0051082 unfolded protein binding; GO:0005488 binding;	K09510			IPR008971; IPR002939; IPR001623;	HSP40/DnaJ peptide-binding; Chaperone DnaJ, C-terminal; DnaJ domain;
A0A2G2Z402	Cannabidiolic acid synthase OS=Capsicum annuum OX=4072 GN=T459_20117	2.292	Up	1.0566e-06	T459_20117	57.18	10.635	12.5	0.598	0.616	0.596	1.346	1.428	1.375	chloroplast	GO:0044699 single-organism process; GO:0008152 metabolic process; GO:0055114 oxidation-reduction process; GO:0044710 single-organism metabolic process;		GO:0097159 organic cyclic compound binding; GO:1901363 heterocyclic compound binding; GO:0016614 oxidoreductase activity, acting on CH-OH group of donors; GO:1901265 nucleoside phosphate binding; GO:0050660 flavin adenine dinucleotide binding; GO:0003824 catalytic activity; GO:0005488 binding; GO:0043167 ion binding; GO:0043168 anion binding; GO:0000166 nucleotide binding; GO:0048037 cofactor bin…				IPR016166; IPR016169; IPR012951; IPR016167; IPR006094;	FAD-binding, type 2; CO dehydrogenase flavoprotein-like, FAD-binding, subdomain 2; Berberine/berberine-like; FAD-binding, type 2, subdomain 1; FAD linked oxidase, N-terminal;
A0A2G2Z4I7	Uncharacterized protein OS=Capsicum annuum OX=4072 GN=T459_20405	1.615	Up	0.004161	T459_20405	12.745	1.1549	18	0.673	0.814	0.804	1.269	1.108	1.324	nucleus	GO:0008152 metabolic process; GO:0006073 cellular glucan metabolic process; GO:0044262 cellular carbohydrate metabolic process; GO:0005976 polysaccharide metabolic process; GO:0044042 glucan metabolic process; GO:0044260 cellular macromolecule metabolic process; GO:0043170 macromolecule metabolic process; GO:0005975 carbohydrate metabolic process; GO:0044238 primary metabolic process; GO:0044237 …	GO:0048046 apoplast; GO:0030312 external encapsulating structure; GO:0044464 cell part; GO:0071944 cell periphery; GO:0005618 cell wall; GO:0005623 cell; GO:0005576 extracellular region;	GO:0016762 xyloglucan:xyloglucosyl transferase activity; GO:0016757 transferase activity, transferring glycosyl groups; GO:0016758 transferase activity, transferring hexosyl groups; GO:0003824 catalytic activity; GO:0016740 transferase activity;	K08235			IPR010713; IPR013320;	Xyloglucan endo-transglycosylase, C-terminal; Concanavalin A-like lectin/glucanase domain;
A0A2G2Z4P7	Xyloglucan endotransglucosylase/hydrolase OS=Capsicum annuum OX=4072 GN=T459_20403	3.359	Up	2.5623e-07	T459_20403	31.351	2.8147	5	0.464	0.461	0.439	1.537	1.55	1.494	nucleus	GO:0044085 cellular component biogenesis; GO:0006073 cellular glucan metabolic process; GO:0044036 cell wall macromolecule metabolic process; GO:0044042 glucan metabolic process; GO:0005975 carbohydrate metabolic process; GO:0044238 primary metabolic process; GO:0044237 cellular metabolic process; GO:0010410 hemicellulose metabolic process; GO:0044264 cellular polysaccharide metabolic process; GO…	GO:0048046 apoplast; GO:0030312 external encapsulating structure; GO:0044464 cell part; GO:0071944 cell periphery; GO:0005618 cell wall; GO:0005623 cell; GO:0005576 extracellular region;	GO:0016762 xyloglucan:xyloglucosyl transferase activity; GO:0016758 transferase activity, transferring hexosyl groups; GO:0003824 catalytic activity; GO:0016798 hydrolase activity, acting on glycosyl bonds; GO:0004553 hydrolase activity, hydrolyzing O-glycosyl compounds; GO:0016757 transferase activity, transferring glycosyl groups; GO:0016787 hydrolase activity; GO:0016740 transferase activity;	K08235			IPR010713; IPR013320; IPR000757;	Xyloglucan endo-transglycosylase, C-terminal; Concanavalin A-like lectin/glucanase domain; Glycoside hydrolase family 16;
A0A2G2Z4R4	Heat stress transcription factor A-5 OS=Capsicum annuum OX=4072 GN=T459_20367	2.206	Up	3.8813e-05	T459_20367	49.296	2.7031	2.3	0.627	0.592	0.642	1.343	1.309	1.454	nucleus	GO:0050794 regulation of cellular process; GO:0010468 regulation of gene expression; GO:0006355 regulation of transcription, DNA-templated; GO:0031326 regulation of cellular biosynthetic process; GO:0080090 regulation of primary metabolic process; GO:0060255 regulation of macromolecule metabolic process; GO:0019219 regulation of nucleobase-containing compound metabolic process; GO:0010556 regulat…	GO:0043226 organelle; GO:0043231 intracellular membrane-bounded organelle; GO:0043229 intracellular organelle; GO:0005634 nucleus; GO:0044464 cell part; GO:0005622 intracellular; GO:0044424 intracellular part; GO:0043227 membrane-bounded organelle; GO:0005623 cell;	GO:0097159 organic cyclic compound binding; GO:1901363 heterocyclic compound binding; GO:0003677 DNA binding; GO:0005488 binding; GO:0001071 nucleic acid binding transcription factor activity; GO:0003676 nucleic acid binding; GO:0043565 sequence-specific DNA binding; GO:0003700 transcription factor activity, sequence-specific DNA binding;	K09419			IPR011991; IPR000232;	Winged helix-turn-helix DNA-binding domain; Heat shock factor (HSF)-type, DNA-binding;
A0A2G2Z4T9	"50S ribosomal protein L4, chloroplastic OS=Capsicum annuum OX=4072 GN=T459_20496"	0.653	Down	0.0023361	T459_20496	37.681	1.7418	4.7	1.223	1.238	1.189	0.773	0.722	0.889	chloroplast	GO:0006518 peptide metabolic process; GO:0043043 peptide biosynthetic process; GO:0044267 cellular protein metabolic process; GO:0006807 nitrogen compound metabolic process; GO:0009058 biosynthetic process; GO:0043603 cellular amide metabolic process; GO:0044238 primary metabolic process; GO:1901566 organonitrogen compound biosynthetic process; GO:1901576 organic substance biosynthetic process; G…	GO:0005840 ribosome; GO:0043226 organelle; GO:0043229 intracellular organelle; GO:0043232 intracellular non-membrane-bounded organelle; GO:0044464 cell part; GO:0005622 intracellular; GO:0005737 cytoplasm; GO:0032991 macromolecular complex; GO:0044424 intracellular part; GO:1990904 ribonucleoprotein complex; GO:0005623 cell; GO:0030529 intracellular ribonucleoprotein complex; GO:0044444 cytoplasm…	GO:0003735 structural constituent of ribosome; GO:0005198 structural molecule activity;	K02926	RP-L4; large subunit ribosomal protein L4	sly03010 Ribosome - Solanum lycopersicum (tomato);	IPR023574;	Ribosomal protein L4 domain;
A0A2G2Z5I7	Autophagy-related protein OS=Capsicum annuum OX=4072 GN=T459_20761	1.933	Up	0.000124411	T459_20761	18.091	2.6674	10.3	0.721	0.644	0.67	1.253	1.291	1.39	cytoplasm				K08341	GABARAP; GABA(A) receptor-associated protein	sly04136 Autophagy - other - Solanum lycopersicum (tomato);	IPR029071;	Ubiquitin-related domain;
A0A2G2Z6H7	ABC transporter B family member 11 OS=Capsicum annuum OX=4072 GN=T459_15631	1.73	Up	4.0177e-05	T459_15631	138.16	3.2259	3	0.766	0.721	0.702	1.283	1.268	1.236	plasma membrane	GO:0006810 transport; GO:0055085 transmembrane transport; GO:0051179 localization; GO:0051234 establishment of localization;	GO:0031224 intrinsic component of membrane; GO:0016020 membrane; GO:0016021 integral component of membrane; GO:0044425 membrane part;	GO:1901265 nucleoside phosphate binding; GO:0015399 primary active transmembrane transporter activity; GO:0016817 hydrolase activity, acting on acid anhydrides; GO:0016787 hydrolase activity; GO:0016887 ATPase activity; GO:0097159 organic cyclic compound binding; GO:1901363 heterocyclic compound binding; GO:0016462 pyrophosphatase activity; GO:0003824 catalytic activity; GO:0032553 ribonucleotide…	K05658	ABCB1; ATP-binding cassette, subfamily B (MDR/TAP), member 1 [EC:7.6.2.2]	sly02010 ABC transporters - Solanum lycopersicum (tomato);	IPR003593; IPR003439; IPR011527; IPR027417;	AAA+ ATPase domain; ABC transporter-like; ABC transporter type 1, transmembrane domain; P-loop containing nucleoside triphosphate hydrolase;
A0A2G2Z8I0	Phosphomethylpyrimidine synthase OS=Capsicum annuum OX=4072 GN=T459_16227	0.612	Down	0.00125775	T459_16227	70.093	36.881	15.2	1.189	1.193	1.359	0.708	0.766	0.817	chloroplast	GO:0009110 vitamin biosynthetic process; GO:0006725 cellular aromatic compound metabolic process; GO:0044699 single-organism process; GO:0009058 biosynthetic process; GO:0042724 thiamine-containing compound biosynthetic process; GO:1901566 organonitrogen compound biosynthetic process; GO:0006772 thiamine metabolic process; GO:0044237 cellular metabolic process; GO:0044272 sulfur compound biosynth…		GO:0051536 iron-sulfur cluster binding; GO:0005488 binding; GO:0051540 metal cluster binding;	K03147	thiC; phosphomethylpyrimidine synthase [EC:4.1.99.17]	sly00730 Thiamine metabolism - Solanum lycopersicum (tomato); sly01100 Metabolic pathways - Solanum lycopersicum (tomato);	IPR025747;	ThiC-associated domain;
A0A2G2Z916	Asparagine synthetase [glutamine-hydrolyzing] OS=Capsicum annuum OX=4072 GN=T459_16555	1.697	Up	0.000157134	T459_16555	66.093	35.717	12.9	0.756	0.736	0.718	1.207	1.339	1.205	cytoplasm	GO:0016053 organic acid biosynthetic process; GO:0009066 aspartate family amino acid metabolic process; GO:0044699 single-organism process; GO:0009058 biosynthetic process; GO:1901566 organonitrogen compound biosynthetic process; GO:0044237 cellular metabolic process; GO:0071704 organic substance metabolic process; GO:0008152 metabolic process; GO:0006520 cellular amino acid metabolic process; GO…		GO:0016879 ligase activity, forming carbon-nitrogen bonds; GO:0016884 carbon-nitrogen ligase activity, with glutamine as amido-N-donor; GO:0003824 catalytic activity; GO:0004066 asparagine synthase (glutamine-hydrolyzing) activity; GO:0016874 ligase activity;	K01953	asnB; asparagine synthase (glutamine-hydrolysing) [EC:6.3.5.4]	sly01110 Biosynthesis of secondary metabolites - Solanum lycopersicum (tomato); sly00250 Alanine, aspartate and glutamate metabolism - Solanum lycopersicum (tomato); sly01230 Biosynthesis of amino acids - Solanum lycopersicum (tomato); sly01100 Metabolic pathways - Solanum lycopersicum (tomato);	IPR014729; IPR029055; IPR033738; IPR001962; IPR017932;	Rossmann-like alpha/beta/alpha sandwich fold; Nucleophile aminohydrolases, N-terminal; Asparagine synthase, N-terminal domain; Asparagine synthase; Glutamine amidotransferase type 2 domain;
A0A2G2Z950	Heat shock protein 82 OS=Capsicum annuum OX=4072 GN=T459_16580	2.254	Up	0.000160442	T459_16580	80.367	10.721	44.8	0.65	0.544	0.639	1.387	1.333	1.412	cytoplasm	GO:0006457 protein folding; GO:0006950 response to stress; GO:0050896 response to stimulus; GO:0009987 cellular process;		GO:0005524 ATP binding; GO:1901265 nucleoside phosphate binding; GO:0001882 nucleoside binding; GO:0043167 ion binding; GO:0005515 protein binding; GO:0000166 nucleotide binding; GO:0097159 organic cyclic compound binding; GO:1901363 heterocyclic compound binding; GO:0032549 ribonucleoside binding; GO:0097367 carbohydrate derivative binding; GO:0032553 ribonucleotide binding; GO:0005488 binding; …	K04079	HSP90A; molecular chaperone HtpG	sly04626 Plant-pathogen interaction - Solanum lycopersicum (tomato); sly04141 Protein processing in endoplasmic reticulum - Solanum lycopersicum (tomato);	IPR020575; IPR020568; IPR003594;	Heat shock protein Hsp90, N-terminal; Ribosomal protein S5 domain 2-type fold; Histidine kinase-like ATPase, C-terminal domain;
A0A2G2ZAV6	Flotillin-like protein 3 OS=Capsicum annuum OX=4072 GN=T459_17126	3.293	Up	2.0395e-05	T459_17126	53.261	5.389	9.8	0.446	0.505	0.436	1.57	1.451	1.546	mitochondria				K07192			IPR001107;	Band 7 domain;
A0A2G2ZBY6	Lipoxygenase OS=Capsicum annuum OX=4072 GN=T459_17447	3.646	Up	2.0736e-08	T459_17447	97.904	231.14	41.5	0.433	0.422	0.424	1.53	1.577	1.556	cytoplasm	GO:0044699 single-organism process; GO:0008152 metabolic process; GO:0055114 oxidation-reduction process; GO:0044710 single-organism metabolic process;		GO:0016702 oxidoreductase activity, acting on single donors with incorporation of molecular oxygen, incorporation of two atoms of oxygen; GO:0016701 oxidoreductase activity, acting on single donors with incorporation of molecular oxygen; GO:0003824 catalytic activity; GO:0005488 binding; GO:0051213 dioxygenase activity; GO:0043167 ion binding; GO:0043169 cation binding; GO:0046872 metal ion bindi…	K15718	LOX1_5; linoleate 9S-lipoxygenase [EC:1.13.11.58]	sly00591 Linoleic acid metabolism - Solanum lycopersicum (tomato);	IPR001024; IPR027433; IPR013819;	PLAT/LH2 domain; Lipoxygenase, domain 3; Lipoxygenase, C-terminal;
A0A2G2ZD86	Uncharacterized protein OS=Capsicum annuum OX=4072 GN=T459_17897	4.005	Up	1.2916e-06	T459_17897	39.137	7.7473	12.2	0.42	0.38	0.386	1.6	1.62	1.53	chloroplast			GO:0005515 protein binding; GO:0051087 chaperone binding; GO:0005488 binding;				IPR003103;	BAG domain;
A0A2G2ZDA2	"Tetrapyrrole-binding protein, chloroplastic (Fragment) OS=Capsicum annuum OX=4072 GN=T459_17976"	0.536	Down	0.00064419	T459_17976	27.196	2.4592	8.8	1.388	1.236	1.309	0.783	0.659	0.667	cytoplasm							IPR008629;	GUN4-like;
A0A2G2ZDG3	Uncharacterized protein OS=Capsicum annuum OX=4072 GN=T459_18109	0.408	Down	0.00025785	T459_18109	134.63	-2	0.6	1.366	1.344	1.592	0.585	0.535	0.635	chloroplast	GO:0006725 cellular aromatic compound metabolic process; GO:0060255 regulation of macromolecule metabolic process; GO:0048519 negative regulation of biological process; GO:0044237 cellular metabolic process; GO:0071704 organic substance metabolic process; GO:0044270 cellular nitrogen compound catabolic process; GO:0008152 metabolic process; GO:0000184 nuclear-transcribed mRNA catabolic process, n…			K18734
A0A2G2ZDX8	Heat shock cognate 70 kDa protein OS=Capsicum annuum OX=4072 GN=T459_18252	1.831	Up	1.51e-06	T459_18252	70.959	106.61	48.3	0.709	0.708	0.682	1.273	1.306	1.264	cytoplasm				K03283	HSPA1s; heat shock 70kDa protein 1/2/6/8	sly03040 Spliceosome - Solanum lycopersicum (tomato); sly04144 Endocytosis - Solanum lycopersicum (tomato); sly04141 Protein processing in endoplasmic reticulum - Solanum lycopersicum (tomato);	IPR029048; IPR029047;	Heat shock protein 70kD, C-terminal domain; Heat shock protein 70kD, peptide-binding domain;
A0A2G2ZF62	"Magnesium-chelatase subunit ChlH, chloroplastic OS=Capsicum annuum OX=4072 GN=T459_13633"	0.532	Down	5.5904e-05	T459_13633	154.22	47.421	10.4	1.374	1.277	1.286	0.699	0.728	0.667	chloroplast	GO:0051188 cofactor biosynthetic process; GO:0046148 pigment biosynthetic process; GO:0006725 cellular aromatic compound metabolic process; GO:0015994 chlorophyll metabolic process; GO:0044699 single-organism process; GO:0009058 biosynthetic process; GO:1901566 organonitrogen compound biosynthetic process; GO:0044237 cellular metabolic process; GO:0071704 organic substance metabolic process; GO:0…		GO:0016851 magnesium chelatase activity; GO:0051002 ligase activity, forming nitrogen-metal bonds; GO:0051003 ligase activity, forming nitrogen-metal bonds, forming coordination complexes; GO:0003824 catalytic activity; GO:0016874 ligase activity;	K03403	chlH; magnesium chelatase subunit H [EC:6.6.1.1]	sly00860 Porphyrin and chlorophyll metabolism - Solanum lycopersicum (tomato); sly01110 Biosynthesis of secondary metabolites - Solanum lycopersicum (tomato); sly01100 Metabolic pathways - Solanum lycopersicum (tomato);	IPR022571;	Magnesium chelatase, subunit H, N-terminal;
A0A2G2ZFR1	Cytochrome OS=Capsicum annuum OX=4072 GN=T459_13858	4.87	Up	2.6381e-06	T459_13858	55.359	2.0877	4.3	0.363	0.329	0.32	1.686	1.546	1.696	cytoplasm	GO:0044699 single-organism process; GO:0008152 metabolic process; GO:0055114 oxidation-reduction process; GO:0044710 single-organism metabolic process;		GO:0097159 organic cyclic compound binding; GO:1901363 heterocyclic compound binding; GO:0020037 heme binding; GO:0005506 iron ion binding; GO:0046914 transition metal ion binding; GO:0003824 catalytic activity; GO:0005488 binding; GO:0043167 ion binding; GO:0043169 cation binding; GO:0046872 metal ion binding; GO:0016705 oxidoreductase activity, acting on paired donors, with incorporation or red…	K20562
A0A2G2ZFX8	Putative low-specificity L-threonine aldolase 1 OS=Capsicum annuum OX=4072 GN=T459_13934	1.689	Up	0.00023756	T459_13934	38.604	3.0557	5.6	0.782	0.696	0.744	1.289	1.274	1.19	cytoplasm	GO:0044281 small molecule metabolic process; GO:0044763 single-organism cellular process; GO:0006807 nitrogen compound metabolic process; GO:0044699 single-organism process; GO:0044238 primary metabolic process; GO:0044237 cellular metabolic process; GO:0071704 organic substance metabolic process; GO:0008152 metabolic process; GO:0006520 cellular amino acid metabolic process; GO:0044710 single-or…		GO:0016829 lyase activity; GO:0003824 catalytic activity;	K01620	ltaE; threonine aldolase [EC:4.1.2.48]	sly00260 Glycine, serine and threonine metabolism - Solanum lycopersicum (tomato); sly01110 Biosynthesis of secondary metabolites - Solanum lycopersicum (tomato); sly01230 Biosynthesis of amino acids - Solanum lycopersicum (tomato); sly01100 Metabolic pathways - Solanum lycopersicum (tomato);	IPR015424; IPR001597; IPR015421; IPR015422;	Pyridoxal phosphate-dependent transferase; Aromatic amino acid beta-eliminating lyase/threonine aldolase; Pyridoxal phosphate-dependent transferase, major region, subdomain 1; Pyridoxal phosphate-dependent transferase, major region, subdomain 2;
A0A2G2ZPX5	Endochitinase B OS=Capsicum annuum OX=4072 GN=T459_12482	1.527	Up	3.8164e-05	T459_12482	30.122	43.998	24.2	0.803	0.799	0.763	1.202	1.233	1.177	extracellular	GO:1901071 glucosamine-containing compound metabolic process; GO:0006030 chitin metabolic process; GO:0044036 cell wall macromolecule metabolic process; GO:0006026 aminoglycan catabolic process; GO:1901136 carbohydrate derivative catabolic process; GO:0006807 nitrogen compound metabolic process; GO:0006032 chitin catabolic process; GO:0005975 carbohydrate metabolic process; GO:0044238 primary met…		GO:0004553 hydrolase activity, hydrolyzing O-glycosyl compounds; GO:0016787 hydrolase activity; GO:0008061 chitin binding; GO:0097367 carbohydrate derivative binding; GO:0004568 chitinase activity; GO:0003824 catalytic activity; GO:0005488 binding; GO:0016798 hydrolase activity, acting on glycosyl bonds;	K01183	E3.2.1.14; chitinase [EC:3.2.1.14]	sly01100 Metabolic pathways - Solanum lycopersicum (tomato); sly00520 Amino sugar and nucleotide sugar metabolism - Solanum lycopersicum (tomato);	IPR023346; IPR001002; IPR000726;	Lysozyme-like domain; Chitin-binding, type 1; Glycoside hydrolase, family 19, catalytic;
A0A2G2ZQ18	Putative choline kinase 1 OS=Capsicum annuum OX=4072 GN=T459_12487	2.506	Up	8.3157e-05	T459_12487	40.256	7.4065	9.8	0.536	0.532	0.631	1.405	1.455	1.397	cytoplasm				K14156	CHK; choline/ethanolamine kinase [EC:2.7.1.32 2.7.1.82]	sly00564 Glycerophospholipid metabolism - Solanum lycopersicum (tomato); sly01100 Metabolic pathways - Solanum lycopersicum (tomato);	IPR011009;	Protein kinase-like domain;
A0A2G2ZQA5	Uncharacterized protein OS=Capsicum annuum OX=4072 GN=T459_12567	1.83	Up	3.5201e-05	T459_12567	58.749	71.903	20.2	0.734	0.668	0.701	1.303	1.284	1.261	chloroplast	GO:0045184 establishment of protein localization; GO:0006810 transport; GO:0071702 organic substance transport; GO:0051179 localization; GO:0033036 macromolecule localization; GO:0008104 protein localization; GO:0015031 protein transport; GO:0051234 establishment of localization;			K19476	IST1; vacuolar protein sorting-associated protein IST1	sly04144 Endocytosis - Solanum lycopersicum (tomato);
A0A2G2ZQX5	Protein LURP-one-related 15 OS=Capsicum annuum OX=4072 GN=T459_12826	2.37	Up	7.904e-07	T459_12826	25.72	17.138	6.1	0.592	0.608	0.569	1.406	1.389	1.398	plasma membrane							IPR025659; IPR007612;	Tubby C-terminal-like domain; LURP1-related protein domain;
A0A2G2ZS71	"Glucan endo-1,3-beta-glucosidase 7 OS=Capsicum annuum OX=4072 GN=T459_13247"	1.554	Up	0.00121752	T459_13247	48.438	9.9765	11.3	0.735	0.735	0.858	1.169	1.211	1.237	extracellular	GO:0008152 metabolic process; GO:0005975 carbohydrate metabolic process; GO:0044238 primary metabolic process; GO:0071704 organic substance metabolic process;		GO:0004553 hydrolase activity, hydrolyzing O-glycosyl compounds; GO:0016787 hydrolase activity; GO:0003824 catalytic activity; GO:0016798 hydrolase activity, acting on glycosyl bonds;				IPR017853; IPR013781;	Glycoside hydrolase superfamily; Glycoside hydrolase, catalytic domain;
A0A2G2ZSJ5	Uncharacterized protein OS=Capsicum annuum OX=4072 GN=T459_13401	2.414	Up	0.00022374	T459_13401	66.767	7.421	6.5	0.539	0.663	0.545	1.463	1.383	1.372	nucleus
A0A2G2ZSR1	Uncharacterized protein OS=Capsicum annuum OX=4072 GN=T459_13463	2.056	Up	5.7451e-05	T459_13463	24.294	76.21	38	0.684	0.648	0.625	1.318	1.42	1.285	nucleus	GO:0001101 response to acid chemical; GO:0042221 response to chemical; GO:0009415 response to water; GO:0006950 response to stress; GO:0009628 response to abiotic stimulus; GO:1901700 response to oxygen-containing compound; GO:0010035 response to inorganic substance; GO:0050896 response to stimulus;
A0A2G2ZTC5	Glycine-rich protein OS=Capsicum annuum OX=4072 GN=T459_07331	0.279	Down	2.3401e-06	T459_07331	26.916	3.4528	17.7	1.673	1.526	1.543	0.427	0.435	0.463	extracellular
A0A2G2ZTD3	Glycine-rich protein OS=Capsicum annuum OX=4072 GN=T459_07329	0.583	Down	3.5521e-06	T459_07329	36.494	13.791	40.3	1.258	1.306	1.277	0.726	0.761	0.752	extracellular
A0A2G2ZU72	Beta-amylase OS=Capsicum annuum OX=4072 GN=T459_07607	1.92	Up	4.4838e-05	T459_07607	65.294	14.289	14.1	0.71	0.631	0.682	1.304	1.302	1.278	peroxisome	GO:1901575 organic substance catabolic process; GO:0008152 metabolic process; GO:0005976 polysaccharide metabolic process; GO:0009057 macromolecule catabolic process; GO:0043170 macromolecule metabolic process; GO:0000272 polysaccharide catabolic process; GO:0044238 primary metabolic process; GO:0005975 carbohydrate metabolic process; GO:0009056 catabolic process; GO:0071704 organic substance met…		GO:0004553 hydrolase activity, hydrolyzing O-glycosyl compounds; GO:0016787 hydrolase activity; GO:0016160 amylase activity; GO:0016161 beta-amylase activity; GO:0003824 catalytic activity; GO:0016798 hydrolase activity, acting on glycosyl bonds;	K01177	E3.2.1.2; beta-amylase [EC:3.2.1.2]	sly00500 Starch and sucrose metabolism - Solanum lycopersicum (tomato);	IPR017853; IPR013781;	Glycoside hydrolase superfamily; Glycoside hydrolase, catalytic domain;
A0A2G2ZVP6	Lipoxygenase OS=Capsicum annuum OX=4072 GN=T459_08160	2.359	Up	2.6782e-07	T459_08160	102.6	24.859	12	0.617	0.612	0.593	1.456	1.428	1.414	cytoplasm	GO:0044699 single-organism process; GO:0008152 metabolic process; GO:0055114 oxidation-reduction process; GO:0044710 single-organism metabolic process;		GO:0016702 oxidoreductase activity, acting on single donors with incorporation of molecular oxygen, incorporation of two atoms of oxygen; GO:0016701 oxidoreductase activity, acting on single donors with incorporation of molecular oxygen; GO:0003824 catalytic activity; GO:0005488 binding; GO:0051213 dioxygenase activity; GO:0043167 ion binding; GO:0043169 cation binding; GO:0046872 metal ion bindi…	K00454	LOX2S; lipoxygenase [EC:1.13.11.12]	sly01110 Biosynthesis of secondary metabolites - Solanum lycopersicum (tomato); sly00592 alpha-Linolenic acid metabolism - Solanum lycopersicum (tomato); sly00591 Linoleic acid metabolism - Solanum lycopersicum (tomato); sly01100 Metabolic pathways - Solanum lycopersicum (tomato);	IPR027433; IPR001024; IPR013819;	Lipoxygenase, domain 3; PLAT/LH2 domain; Lipoxygenase, C-terminal;
A0A2G2ZZH4	Heat shock protein 82 OS=Capsicum annuum OX=4072 GN=T459_09482	6.136	Up	1.4369e-06	T459_09482	80.573	229.41	44.1	0.257	0.287	0.288	1.658	1.804	1.643	cytoplasm	GO:0006457 protein folding; GO:0006950 response to stress; GO:0050896 response to stimulus; GO:0009987 cellular process;		GO:0005524 ATP binding; GO:1901265 nucleoside phosphate binding; GO:0001882 nucleoside binding; GO:0043167 ion binding; GO:0005515 protein binding; GO:0000166 nucleotide binding; GO:0097159 organic cyclic compound binding; GO:1901363 heterocyclic compound binding; GO:0032549 ribonucleoside binding; GO:0097367 carbohydrate derivative binding; GO:0032553 ribonucleotide binding; GO:0005488 binding; …	K04079	HSP90A; molecular chaperone HtpG	sly04626 Plant-pathogen interaction - Solanum lycopersicum (tomato); sly04141 Protein processing in endoplasmic reticulum - Solanum lycopersicum (tomato);	IPR020568; IPR020575; IPR003594;	Ribosomal protein S5 domain 2-type fold; Heat shock protein Hsp90, N-terminal; Histidine kinase-like ATPase, C-terminal domain;
A0A2G3A055	"Small heat shock protein, chloroplastic OS=Capsicum annuum OX=4072 GN=T459_09696"	4.608	Up	9.5707e-07	T459_09696	25.777	40.11	39.3	0.376	0.346	0.337	1.669	1.628	1.583	chloroplast				K13993	HSP20; HSP20 family protein	sly04141 Protein processing in endoplasmic reticulum - Solanum lycopersicum (tomato);	IPR002068; IPR008978;	Alpha crystallin/Hsp20 domain; HSP20-like chaperone;
A0A2G3A131	Adenylate kinase 4 OS=Capsicum annuum OX=4072 GN=T459_10053	0.604	Down	4.9351e-06	T459_10053	26.487	37.97	44	1.268	1.227	1.259	0.77	0.733	0.763	cytoplasm	GO:0008152 metabolic process; GO:0006725 cellular aromatic compound metabolic process; GO:0046483 heterocycle metabolic process; GO:0006139 nucleobase-containing compound metabolic process; GO:1901360 organic cyclic compound metabolic process; GO:0006807 nitrogen compound metabolic process; GO:0034641 cellular nitrogen compound metabolic process; GO:0044238 primary metabolic process; GO:0009987 c…		GO:0005524 ATP binding; GO:1901265 nucleoside phosphate binding; GO:0004017 adenylate kinase activity; GO:0019205 nucleobase-containing compound kinase activity; GO:0001882 nucleoside binding; GO:0043167 ion binding; GO:0000166 nucleotide binding; GO:0019201 nucleotide kinase activity; GO:0016776 phosphotransferase activity, phosphate group as acceptor; GO:0097159 organic cyclic compound binding;…	K00939	adk; adenylate kinase [EC:2.7.4.3]	sly01110 Biosynthesis of secondary metabolites - Solanum lycopersicum (tomato); sly00230 Purine metabolism - Solanum lycopersicum (tomato); sly00730 Thiamine metabolism - Solanum lycopersicum (tomato); sly01100 Metabolic pathways - Solanum lycopersicum (tomato);	IPR007862; IPR027417;	Adenylate kinase, active site lid domain; P-loop containing nucleoside triphosphate hydrolase;
A0A2G3A187	17.9 kDa class II heat shock protein OS=Capsicum annuum OX=4072 GN=T459_10098	2.682	Up	0.00142375	T459_10098	17.757	27.846	30.4	0.576	0.531	0.507	1.448	1.443	1.437	cytoplasm				K13993	HSP20; HSP20 family protein	sly04141 Protein processing in endoplasmic reticulum - Solanum lycopersicum (tomato);	IPR002068; IPR008978;	Alpha crystallin/Hsp20 domain; HSP20-like chaperone;
A0A2G3A1B9	17.9 kDa class II heat shock protein OS=Capsicum annuum OX=4072 GN=T459_10097	6.608	Up	1.4232e-08	T459_10097	17.689	3.6741	30.4	0.255	0.265	0.266	1.716	1.719	1.759	cytoplasm				K13993	HSP20; HSP20 family protein	sly04141 Protein processing in endoplasmic reticulum - Solanum lycopersicum (tomato);	IPR002068; IPR008978;	Alpha crystallin/Hsp20 domain; HSP20-like chaperone;
A0A2G3A3D9	Putative pyridoxal 5'-phosphate synthase subunit PDX1 OS=Capsicum annuum OX=4072 GN=T459_10865	3.124	Up	0.0003034	T459_10865	32.848	48.002	28.2	0.398	0.482	0.555	1.516	1.529	1.438	cytoplasm	GO:0051188 cofactor biosynthetic process; GO:0009110 vitamin biosynthetic process; GO:0006725 cellular aromatic compound metabolic process; GO:1901615 organic hydroxy compound metabolic process; GO:0042822 pyridoxal phosphate metabolic process; GO:0044699 single-organism process; GO:0009058 biosynthetic process; GO:1901566 organonitrogen compound biosynthetic process; GO:0044237 cellular metaboli…		GO:0003824 catalytic activity;	K06215	pdxS; pyridoxal 5'-phosphate synthase pdxS subunit [EC:4.3.3.6]	sly00750 Vitamin B6 metabolism - Solanum lycopersicum (tomato);	IPR033755; IPR013785; IPR011060;	PdxS/SNZ N-terminal domain; Aldolase-type TIM barrel; Ribulose-phosphate binding barrel;
A0A2G3A698	5-epiaristolochene synthase OS=Capsicum annuum OX=4072 GN=T459_04880	4.081	Up	0.0010996	T459_04880	64.685	23.157	19	0.329	0.53	0.312	1.623	1.505	1.651	cytoskeleton	GO:0008152 metabolic process;		GO:0000287 magnesium ion binding; GO:0003824 catalytic activity; GO:0010333 terpene synthase activity; GO:0005488 binding; GO:0043167 ion binding; GO:0046872 metal ion binding; GO:0043169 cation binding; GO:0016829 lyase activity; GO:0016838 carbon-oxygen lyase activity, acting on phosphates; GO:0016835 carbon-oxygen lyase activity;	K15804			IPR005630; IPR008949; IPR008930; IPR001906;	Terpene synthase, metal-binding domain; Isoprenoid synthase domain; Terpenoid cyclases/protein prenyltransferase alpha-alpha toroid; Terpene synthase, N-terminal domain;
A0A2G3A6G3	Uncharacterized protein OS=Capsicum annuum OX=4072 GN=T459_04940	2.652	Up	1.83672e-05	T459_04940	42.234	3.4385	4.6	0.572	0.534	0.526	1.532	1.398	1.398	nucleus			GO:0043169 cation binding; GO:0046872 metal ion binding; GO:0005515 protein binding; GO:0008270 zinc ion binding; GO:0046914 transition metal ion binding; GO:0005488 binding; GO:0043167 ion binding;				IPR004146; IPR013083; IPR001965;	DC1; Zinc finger, RING/FYVE/PHD-type; Zinc finger, PHD-type;
A0A2G3A835	Caffeoyl-CoA O-methyltransferase 1 OS=Capsicum annuum OX=4072 GN=T459_05481	1.769	Up	2.0361e-05	T459_05481	27.232	1.9059	6.6	0.723	0.691	0.743	1.28	1.295	1.241	cytoplasm			GO:0016741 transferase activity, transferring one-carbon groups; GO:0008171 O-methyltransferase activity; GO:0008168 methyltransferase activity; GO:0003824 catalytic activity; GO:0016740 transferase activity;	K00588	E2.1.1.104; caffeoyl-CoA O-methyltransferase [EC:2.1.1.104]	sly01110 Biosynthesis of secondary metabolites - Solanum lycopersicum (tomato); sly00945 Stilbenoid, diarylheptanoid and gingerol biosynthesis - Solanum lycopersicum (tomato); sly00941 Flavonoid biosynthesis - Solanum lycopersicum (tomato); sly00940 Phenylpropanoid biosynthesis - Solanum lycopersicum (tomato); sly01100 Metabolic pathways - Solanum lycopersicum (tomato); sly00360 Phenylalanine met…	IPR029063;	S-adenosyl-L-methionine-dependent methyltransferase;
A0A2G3A839	Putative F-box/LRR-repeat protein 8 OS=Capsicum annuum OX=4072 GN=T459_05456	2.907	Up	2.4532e-05	T459_05456	59.335	20.934	11.5	0.546	0.464	0.522	1.503	1.506	1.445	chloroplast			GO:0005515 protein binding; GO:0005488 binding;	K10268			IPR001810; IPR032675;	F-box domain; Leucine-rich repeat domain, L domain-like;
A0A2G3AAC0	Histone H1 OS=Capsicum annuum OX=4072 GN=T459_06271	0.488	Down	2.1967e-05	T459_06271	24.706	4.3718	12.3	1.344	1.368	1.349	0.622	0.668	0.693	chloroplast	GO:0044085 cellular component biogenesis; GO:0016043 cellular component organization; GO:0034728 nucleosome organization; GO:0034622 cellular macromolecular complex assembly; GO:0006333 chromatin assembly or disassembly; GO:0043933 macromolecular complex subunit organization; GO:0065004 protein-DNA complex assembly; GO:0006323 DNA packaging; GO:0006334 nucleosome assembly; GO:0051276 chromosome o…	GO:0043229 intracellular organelle; GO:0043232 intracellular non-membrane-bounded organelle; GO:0044446 intracellular organelle part; GO:0032991 macromolecular complex; GO:0044424 intracellular part; GO:0005623 cell; GO:0044422 organelle part; GO:0044427 chromosomal part; GO:0000786 nucleosome; GO:0043228 non-membrane-bounded organelle; GO:0043231 intracellular membrane-bounded organelle; GO:0043…	GO:0097159 organic cyclic compound binding; GO:1901363 heterocyclic compound binding; GO:0003677 DNA binding; GO:0005488 binding; GO:0003676 nucleic acid binding;	K11275			IPR011991; IPR005818;	Winged helix-turn-helix DNA-binding domain; Linker histone H1/H5, domain H15;
A0A2G3ADN2	1-aminocyclopropane-1-carboxylate synthase OS=Capsicum annuum OX=4072 GN=T459_00227	3.506	Up	0.00199508	T459_00227	54.867	5.4189	7	0.489	0.423	0.407	1.56	1.531	1.534	cytoplasm	GO:0009058 biosynthetic process; GO:0008152 metabolic process;		GO:0097159 organic cyclic compound binding; GO:1901363 heterocyclic compound binding; GO:0003824 catalytic activity; GO:0005488 binding; GO:0043167 ion binding; GO:0043168 anion binding; GO:0048037 cofactor binding; GO:0030170 pyridoxal phosphate binding;	K20772	ACS1_2_6; 1-aminocyclopropane-1-carboxylate synthase 1/2/6 [EC:4.4.1.14]	sly01110 Biosynthesis of secondary metabolites - Solanum lycopersicum (tomato); sly00270 Cysteine and methionine metabolism - Solanum lycopersicum (tomato); sly04016 MAPK signaling pathway - plant - Solanum lycopersicum (tomato); sly01100 Metabolic pathways - Solanum lycopersicum (tomato);	IPR004839; IPR015424; IPR015421; IPR015422;	Aminotransferase, class I/classII; Pyridoxal phosphate-dependent transferase; Pyridoxal phosphate-dependent transferase, major region, subdomain 1; Pyridoxal phosphate-dependent transferase, major region, subdomain 2;
A0A2G3AE16	Glutathione peroxidase OS=Capsicum annuum OX=4072 GN=T459_00315	1.714	Up	0.00024084	T459_00315	18.81	21.551	29.6	0.76	0.71	0.728	1.238	1.348	1.182	chloroplast	GO:0008152 metabolic process; GO:0006950 response to stress; GO:0055114 oxidation-reduction process; GO:0044710 single-organism metabolic process; GO:0006979 response to oxidative stress; GO:0044699 single-organism process; GO:0050896 response to stimulus;		GO:0016209 antioxidant activity; GO:0004601 peroxidase activity; GO:0004602 glutathione peroxidase activity; GO:0003824 catalytic activity; GO:0016491 oxidoreductase activity; GO:0016684 oxidoreductase activity, acting on peroxide as acceptor;	K00432	gpx; glutathione peroxidase [EC:1.11.1.9]	sly00590 Arachidonic acid metabolism - Solanum lycopersicum (tomato); sly00480 Glutathione metabolism - Solanum lycopersicum (tomato);	IPR012336;	Thioredoxin-like fold;
A0A2G3AE27	Uncharacterized protein OS=Capsicum annuum OX=4072 GN=T459_00369	1.74	Up	4.8713e-07	T459_00369	66.626	24.334	9.7	0.716	0.721	0.734	1.248	1.249	1.28	nucleus			GO:0005515 protein binding; GO:0005488 binding;				IPR029071; IPR001012; IPR009060;	Ubiquitin-related domain; UBX domain; UBA-like;
A0A2G3AED4	Uncharacterized protein OS=Capsicum annuum OX=4072 GN=T459_00488	1.524	Up	0.0009197	T459_00488	39.332	2.2235	5.8	0.741	0.766	0.863	1.215	1.224	1.173	nucleus
A0A2G3AEG8	FAM10 family protein OS=Capsicum annuum OX=4072 GN=T459_00513	0.603	Down	0.00171502	T459_00513	41.404	87.424	36.8	1.258	1.249	1.263	0.746	0.789	0.738	nucleus			GO:0005515 protein binding; GO:0005488 binding;	K09560			IPR006636; IPR011990; IPR013026;	Heat shock chaperonin-binding; Tetratricopeptide-like helical domain; Tetratricopeptide repeat-containing domain;
A0A2G3AEL6	L-lactate dehydrogenase OS=Capsicum annuum OX=4072 GN=T459_00568	4.042	Up	0.00132081	T459_00568	37.54	22.503	18.6	0.408	0.354	0.416	1.593	1.581	1.587	chloroplast	GO:0008152 metabolic process; GO:0055114 oxidation-reduction process; GO:0044710 single-organism metabolic process; GO:0044281 small molecule metabolic process; GO:0044763 single-organism cellular process; GO:0019752 carboxylic acid metabolic process; GO:0044699 single-organism process; GO:0005975 carbohydrate metabolic process; GO:0044238 primary metabolic process; GO:0006082 organic acid metabo…	GO:0044424 intracellular part; GO:0005623 cell; GO:0044464 cell part; GO:0005622 intracellular; GO:0005737 cytoplasm;	GO:0016614 oxidoreductase activity, acting on CH-OH group of donors; GO:0004457 lactate dehydrogenase activity; GO:0016616 oxidoreductase activity, acting on the CH-OH group of donors, NAD or NADP as acceptor; GO:0004459 L-lactate dehydrogenase activity; GO:0003824 catalytic activity; GO:0016491 oxidoreductase activity;	K00016	LDH; L-lactate dehydrogenase [EC:1.1.1.27]	sly00640 Propanoate metabolism - Solanum lycopersicum (tomato); sly00620 Pyruvate metabolism - Solanum lycopersicum (tomato); sly01110 Biosynthesis of secondary metabolites - Solanum lycopersicum (tomato); sly00270 Cysteine and methionine metabolism - Solanum lycopersicum (tomato); sly00010 Glycolysis / Gluconeogenesis - Solanum lycopersicum (tomato); sly01100 Metabolic pathways - Solanum lycoper…	IPR022383; IPR016040; IPR001236; IPR015955;	Lactate/malate dehydrogenase, C-terminal; NAD(P)-binding domain; Lactate/malate dehydrogenase, N-terminal; Lactate dehydrogenase/glycoside hydrolase, family 4, C-terminal;
A0A2G3AEQ2	"Heat shock 22 kDa protein, mitochondrial OS=Capsicum annuum OX=4072 GN=T459_00593"	4.342	Up	3.2546e-08	T459_00593	24.148	22.78	28.9	0.359	0.375	0.372	1.581	1.603	1.618	cytoplasm				K13993	HSP20; HSP20 family protein	sly04141 Protein processing in endoplasmic reticulum - Solanum lycopersicum (tomato);	IPR002068; IPR008978;	Alpha crystallin/Hsp20 domain; HSP20-like chaperone;
A0A2G3AET1	"Heat shock 22 kDa protein, mitochondrial OS=Capsicum annuum OX=4072 GN=T459_00592"	5.993	Up	5.9877e-08	T459_00592	24.323	45.644	38.1	0.273	0.282	0.27	1.646	1.697	1.601	chloroplast				K13993	HSP20; HSP20 family protein	sly04141 Protein processing in endoplasmic reticulum - Solanum lycopersicum (tomato);	IPR002068; IPR008978;	Alpha crystallin/Hsp20 domain; HSP20-like chaperone;
A0A2G3AJ84	YTH domain-containing family protein 2 OS=Capsicum annuum OX=4072 GN=T459_02142	2.465	Up	1.8909e-07	T459_02142	57.327	45.841	23.7	0.594	0.572	0.57	1.411	1.435	1.434	nucleus			GO:0097159 organic cyclic compound binding; GO:1901363 heterocyclic compound binding; GO:0003723 RNA binding; GO:0005488 binding; GO:0003676 nucleic acid binding;	K20102			IPR007275;	YTH domain;
A0A2G3AKT2	Long chain acyl-CoA synthetase 1 OS=Capsicum annuum OX=4072 GN=T459_02739	0.666	Down	0.0074995	T459_02739	69.55	2.8477	1.5	1.3	1.189	1.124	0.695	0.842	0.87	cytoplasm	GO:0008152 metabolic process;		GO:0003824 catalytic activity;	K01897	ACSL; long-chain acyl-CoA synthetase [EC:6.2.1.3]	sly00061 Fatty acid biosynthesis - Solanum lycopersicum (tomato); sly01212 Fatty acid metabolism - Solanum lycopersicum (tomato); sly04146 Peroxisome - Solanum lycopersicum (tomato); sly01100 Metabolic pathways - Solanum lycopersicum (tomato); sly00071 Fatty acid degradation - Solanum lycopersicum (tomato);	IPR000873;	AMP-dependent synthetase/ligase;
A0A2G3ALC4	"1-deoxy-D-xylulose-5-phosphate synthase, chloroplastic OS=Capsicum annuum OX=4072 GN=T459_02911"	0.607	Down	0.000102066	T459_02911	76.896	3.6192	3.8	1.259	1.229	1.268	0.78	0.714	0.787	cytoplasm	GO:0006720 isoprenoid metabolic process; GO:0044711 single-organism biosynthetic process; GO:0044763 single-organism cellular process; GO:0044699 single-organism process; GO:0009058 biosynthetic process; GO:0044255 cellular lipid metabolic process; GO:0044238 primary metabolic process; GO:0044237 cellular metabolic process; GO:1901576 organic substance biosynthetic process; GO:0044249 cellular bi…		GO:0008661 1-deoxy-D-xylulose-5-phosphate synthase activity; GO:0003824 catalytic activity; GO:0016740 transferase activity; GO:0016744 transferase activity, transferring aldehyde or ketonic groups;	K01662	dxs; 1-deoxy-D-xylulose-5-phosphate synthase [EC:2.2.1.7]	sly01110 Biosynthesis of secondary metabolites - Solanum lycopersicum (tomato); sly00730 Thiamine metabolism - Solanum lycopersicum (tomato); sly00900 Terpenoid backbone biosynthesis - Solanum lycopersicum (tomato); sly01100 Metabolic pathways - Solanum lycopersicum (tomato);	IPR005474; IPR009014; IPR033248; IPR029061; IPR005475;	Transketolase, N-terminal; Transketolase C-terminal/Pyruvate-ferredoxin oxidoreductase domain II; Transketolase, C-terminal domain; Thiamin diphosphate-binding fold; Transketolase-like, pyrimidine-binding domain;
A0A2G3ALH4	Ribulose bisphosphate carboxylase large chain OS=Capsicum annuum OX=4072 GN=T459_02979	1.739	Up	0.00088244	T459_02979	23.4	2.1804	42.9	0.692	0.803	0.688	1.196	1.246	1.354	chloroplast			GO:0000287 magnesium ion binding; GO:0043169 cation binding; GO:0046872 metal ion binding; GO:0005488 binding; GO:0043167 ion binding;	K01601	rbcL; ribulose-bisphosphate carboxylase large chain [EC:4.1.1.39]	sly00630 Glyoxylate and dicarboxylate metabolism - Solanum lycopersicum (tomato); sly01200 Carbon metabolism - Solanum lycopersicum (tomato); sly00710 Carbon fixation in photosynthetic organisms - Solanum lycopersicum (tomato); sly01100 Metabolic pathways - Solanum lycopersicum (tomato);	IPR000685;	Ribulose bisphosphate carboxylase, large subunit, C-terminal;
A0A2G3AM12	UMP-CMP kinase 3 OS=Capsicum annuum OX=4072 GN=T459_03157	3.104	Up	6.3285e-05	T459_03157	16.233	3.8342	18.4	0.466	0.443	0.541	1.581	1.444	1.476	cytoplasm	GO:0008152 metabolic process; GO:0006725 cellular aromatic compound metabolic process; GO:0046483 heterocycle metabolic process; GO:0006139 nucleobase-containing compound metabolic process; GO:1901360 organic cyclic compound metabolic process; GO:0006807 nitrogen compound metabolic process; GO:0034641 cellular nitrogen compound metabolic process; GO:0044238 primary metabolic process; GO:0009987 c…		GO:0005524 ATP binding; GO:1901265 nucleoside phosphate binding; GO:0019205 nucleobase-containing compound kinase activity; GO:0001882 nucleoside binding; GO:0043167 ion binding; GO:0000166 nucleotide binding; GO:0097159 organic cyclic compound binding; GO:1901363 heterocyclic compound binding; GO:0032549 ribonucleoside binding; GO:0097367 carbohydrate derivative binding; GO:0016301 kinase activi…	K13800	CMPK1; UMP-CMP kinase [EC:2.7.4.14]	sly01100 Metabolic pathways - Solanum lycopersicum (tomato); sly00240 Pyrimidine metabolism - Solanum lycopersicum (tomato);	IPR027417;	P-loop containing nucleoside triphosphate hydrolase;
A0A2G3AMN4	Uncharacterized protein OS=Capsicum annuum OX=4072 GN=T459_03361	3.538	Up	2.6629e-06	T459_03361	33.429	21.72	25.3	0.461	0.463	0.413	1.602	1.583	1.545	cytoplasm	GO:0045184 establishment of protein localization; GO:0006810 transport; GO:0046907 intracellular transport; GO:0070727 cellular macromolecule localization; GO:0051649 establishment of localization in cell; GO:0016192 vesicle-mediated transport; GO:0006886 intracellular protein transport; GO:0071702 organic substance transport; GO:0008104 protein localization; GO:0033036 macromolecule localization…	GO:0016020 membrane;	GO:0005484 SNAP receptor activity; GO:0005515 protein binding; GO:0005488 binding;	K08486	STX1B_2_3; syntaxin 1B/2/3	sly04130 SNARE interactions in vesicular transport - Solanum lycopersicum (tomato);	IPR000727; IPR010989; IPR006011;	Target SNARE coiled-coil homology domain; SNARE; Syntaxin, N-terminal domain;
A0A2G3AP59	Uncharacterized protein OS=Capsicum annuum OX=4072 GN=T459_03904	5.904	Up	1.6576e-06	T459_03904	26.151	3.9289	4.7	0.296	0.301	0.261	1.628	1.717	1.721	chloroplast							IPR013783; IPR004864;	Immunoglobulin-like fold; Late embryogenesis abundant protein, LEA-14;
D7PF27	Stress-related protein 1 OS=Capsicum annuum OX=4072 GN=SRP1	6.112	Up	6.1976e-05	SRP1	24.795	14.836	30.7	0.284	0.284	0.209	1.638	1.592	1.519	nucleus
E9JEC2	Epidermis-specific secreted glycoprotein EP1 OS=Capsicum annuum OX=4072 GN=MBL1	1.793	Up	2.1624e-07	MBL1	33.683	83.137	26.3	0.703	0.722	0.715	1.265	1.288	1.284	extracellular			GO:0030246 carbohydrate binding; GO:0005488 binding;				IPR001480;	Bulb-type lectin domain;
I6VW44	Pathogenesis-related protein 4 OS=Capsicum annuum OX=4072 GN=PR4	2.608	Up	1.9638e-05	PR4	15.87	14.305	32.9	0.518	0.55	0.582	1.429	1.494	1.38	extracellular	GO:0050832 defense response to fungus; GO:0009605 response to external stimulus; GO:0009620 response to fungus; GO:0006950 response to stress; GO:0042742 defense response to bacterium; GO:0098542 defense response to other organism; GO:0006952 defense response; GO:0043207 response to external biotic stimulus; GO:0050896 response to stimulus; GO:0051707 response to other organism; GO:0009617 respon…						IPR009009; IPR001153;	RlpA-like protein, double-psi beta-barrel domain; Barwin domain;
